# Supplementary material for: Cities near volcanoes are increasingly threatened by volcanic hazards
Source: Research Square preprint supplement (doi:10.21203/rs.3.rs-8315006/v1), 2025-12-10
Supplement: Supplementary file 1 [file 5562ba8bb74e066565e6ba2e.xlsx]

## Sheet: CityGrowthMetrics_2030(CityGrow
city_ID	City	Country	Continent	Subregion	Latitude	Longitude	YOB	YOD	Nyears	Nvolc_100km	Within	Ninc_10km	Ninc_30km	Ninc_100km	Ninc_10to30km	Ninc_30to100km	ICA_total	ICA_10km	ICA_30km	ICA_100km	ICA_10to30km	ICA_30to100km	FCA_total	FCA_10km	FCA_30km	FCA_100km	FCA_10to30km	FCA_30to100km	CCA_total	CCA_10km	CCA_30km	CCA_100km	CCA_10to30km	CCA_30to100km	ACA_total	ACA_10km	ACA_30km	ACA_100km	Freq_10km	Freq_10to30km	Freq_30to100km	IPOP_total	IPOP_10km	IPOP_30km	IPOP_100km	FPOP_total	FPOP_10km	FPOP_30km	FPOP_100km
1	`Amran	Yemen	Asia	Western Asia	15.6574	43.9385	1985	2030	9	1	FULL	0	6	6	6	0	9.93824	0	9.93824	9.93824	9.93824	0	20.8701	0	20.8701	20.8701	20.8701	0	10.9318	0	10.9318	10.9318	10.9318	0	1.21465	0	1.21465	1.21465	0	66.6667	0	54385.7	0	54385.7	54385.7	191866	0	191866	191866
3	Aachen	Germany	Europe	Western Europe	50.7765	6.10933	1975	2030	11	1	FULL	0	0	5	0	5	48.0766	0	0	48.0766	0	48.0766	61.0955	0	0	61.0955	0	61.0955	13.0189	0	0	13.0189	0	13.0189	1.18354	0	0	1.18354	0	0	45.4545	197643	0	0	197643	221674	0	0	221674
4	Abbotsford	Canada	North America	Northern America	49.0513	-122.316	1995	2030	7	2	FULL	0	0	6	0	6	27.0053	0	0	27.0053	0	27.0053	46.0097	0	0	46.0097	0	46.0097	19.0044	0	0	19.0044	0	19.0044	2.71491	0	0	2.71491	0	0	85.7143	61085.4	0	0	61085.4	131105	0	0	131105
5	Abha	Saudi Arabia	Asia	Western Asia	18.2188	42.5139	1975	2030	11	1	PARTIAL	0	0	3	0	3	25.8835	0	0	25.8835	0	25.8835	28.8697	0	0	28.0913	0	28.0913	2.98612	0	0	2.20776	0	2.20776	0.271466	0	0	0.200706	0	0	27.2727	107385	0	0	107385	125267	0	0	124566
6	Abomsa	Ethiopia	Africa	Eastern Africa	8.48779	39.8316	2000	2030	6	10	FULL	0	0	2	0	2	3.97203	0	0	3.97203	0	3.97203	5.95819	0	0	5.95819	0	5.95819	1.98616	0	0	1.98616	0	1.98616	0.331027	0	0	0.331027	0	0	33.3333	56072.5	0	0	56072.5	64528.3	0	0	64528.3
7	Abu `Arish	Saudi Arabia	Asia	Western Asia	16.9692	42.8325	1975	2030	11	1	FULL	2	4	4	2	0	7.95946	7.15855	7.95946	7.95946	0.800909	0	11.9396	9.58058	11.9396	11.9396	2.35897	0	3.9801	2.42204	3.9801	3.9801	1.55806	0	0.361827	0.220185	0.361827	0.361827	18.1818	18.1818	0	61879.7	60909.3	61879.7	61879.7	95271.6	87411.6	95271.6	95271.6
8	AcÃ¡mbaro	Mexico	North America	Central America	20.0283	-100.722	2015	2030	3	1	FULL	0	0	0	0	0	11.9382	0	0	11.9382	0	11.9382	11.9382	0	0	11.9382	0	11.9382	0	0	0	0	0	0	0	0	0	0	0	0	0	53720.7	0	0	53720.7	69853.5	0	0	69853.5
9	Acayucan	Mexico	North America	Central America	17.954	-94.909	2005	2030	5	1	FULL	0	0	2	0	2	12.9323	0	0	12.9323	0	12.9323	16.9124	0	0	16.9124	0	16.9124	3.98016	0	0	3.98016	0	3.98016	0.796032	0	0	0.796032	0	0	40	51817.8	0	0	51817.8	67216.1	0	0	67216.1
12	Acilia	Italy	Europe	Southern Europe	41.7693	12.3638	1975	2030	11	1	FULL	0	0	1	0	1	31.9885	0	14.4482	31.9885	14.4482	17.5403	42.9845	0	14.4482	42.9845	14.4482	28.5363	10.996	0	0	10.996	0	10.996	0.999632	0	0	0.999632	0	0	9.09091	101935	0	42222.7	101935	134073	0	50006.1	134073
13	Acireale	Italy	Europe	Southern Europe	37.6027	15.1524	1975	2030	11	3	FULL	0	2	2	2	0	13.9647	0	13.9647	13.9647	13.9647	0	19.9497	0	19.9497	19.9497	19.9497	0	5.98492	0	5.98492	5.98492	5.98492	0	0.544083	0	0.544083	0.544083	0	18.1818	0	52331.9	0	52331.9	52331.9	73891.4	0	73891.4	73891.4
15	Ad Dala	Yemen	Asia	Western Asia	13.7046	44.7317	1995	2030	7	1	FULL	0	0	2	0	2	4.96628	0	0	4.96628	0	4.96628	6.95313	0	0	6.95313	0	6.95313	1.98685	0	0	1.98685	0	1.98685	0.283836	0	0	0.283836	0	0	28.5714	51010.6	0	0	51010.6	103731	0	0	103731
16	Adama	Ethiopia	Africa	Eastern Africa	8.54058	39.2758	1975	2030	11	11	FULL	3	10	10	10	0	17.8708	0	17.8708	17.8708	17.8708	0	64.5334	2.27667	64.5334	64.5334	62.2567	0	46.6626	2.27667	46.6626	46.6626	44.3859	0	4.24205	0.20697	4.24205	4.24205	27.2727	90.9091	0	68435.5	0	68435.5	68435.5	705993	7031.81	705993	705993
17	Addis Ababa	Ethiopia	Africa	Eastern Africa	9.01291	38.7534	1975	2030	11	9	FULL	0	9	11	9	11	151.907	0	4.79262	151.907	4.79262	147.115	474.584	0	112.306	474.584	112.306	362.278	322.676	0	107.513	322.676	107.513	215.163	29.3342	0	9.77394	29.3342	0	81.8182	100	882702	0	16125.7	882702	9080252	0	998000	9080252
18	Adigrat	Ethiopia	Africa	Eastern Africa	14.2835	39.4631	1985	2030	9	2	FULL	0	0	5	0	5	8.94023	0	0	8.94023	0	8.94023	15.8943	0	0	15.8943	0	15.8943	6.95405	0	0	6.95405	0	6.95405	0.772672	0	0	0.772672	0	0	55.5556	52329.3	0	0	52329.3	164811	0	0	164811
19	Afar Zone 1	Ethiopia	Africa	Eastern Africa	11.4042	40.7538	2025	2030	1	7	FULL	0	0	0	0	0	10.9332	0	0	10.9332	0	10.9332	10.9332	0	0	10.9332	0	10.9332	0	0	0	0	0	0	0	0	0	0	0	0	0	67075.1	0	0	67075.1	68789.8	0	0	68789.8
21	Afar Zone 4	Ethiopia	Africa	Eastern Africa	12.1435	39.9784	2025	2030	1	5	FULL	0	0	0	0	0	2.98018	0	2.98018	2.98018	2.98018	0	2.98018	0	2.98018	2.98018	2.98018	0	0	0	0	0	0	0	0	0	0	0	0	0	0	52518	0	52518	52518	50540.1	0	50540.1	50540.1
22	Agadez	Niger	Africa	Western Africa	16.9719	7.98634	1975	2030	11	1	FULL	0	0	8	0	8	9.93922	0	0	9.93922	0	9.93922	27.83	0	0	27.83	0	27.83	17.8908	0	0	17.8907	0	17.8907	1.62643	0	0	1.62643	0	0	72.7273	66745.3	0	0	66745.3	425566	0	0	425566
23	Agre Salam	Ethiopia	Africa	Eastern Africa	6.48759	38.5219	1980	2030	10	3	FULL	0	0	4	0	4	2.97825	0	0	2.97825	0	2.97825	6.94926	0	0	6.94926	0	6.94926	3.97102	0	0	3.97102	0	3.97102	0.397102	0	0	0.397102	0	0	40	50706.6	0	0	50706.6	63475.3	0	0	63475.3
24	Agri	Turkey	Asia	Western Asia	39.7193	43.05	1980	2030	10	1	FULL	0	0	5	0	5	7.98917	0	0	7.98917	0	7.98917	21.9704	0	0	21.9704	0	21.9704	13.9812	0	0	13.9812	0	13.9812	1.39812	0	0	1.39812	0	0	50	52409.1	0	0	52409.1	151930	0	0	151930
25	Ahuachapan	El Salvador	North America	Central America	13.9287	-89.8499	1980	2030	10	21	FULL	2	3	3	3	0	9.95638	0	9.95638	9.95638	9.95638	0	19.9123	0.984144	19.9123	19.9123	18.9282	0	9.95593	0.984144	9.95593	9.95593	8.97178	0	0.995593	0.0984144	0.995593	0.995593	20	30	0	52468.9	0	52468.9	52468.9	86419.1	1714.17	86419.1	86419.1
26	Ainamoi	Kenya	Africa	Eastern Africa	-0.361058	35.2747	2025	2030	1	2	FULL	0	0	1	0	1	13.9172	0	0	13.9172	0	13.9172	14.9113	0	0	14.9113	0	14.9113	0.994069	0	0	0.994069	0	0.994069	0.994069	0	0	0.994069	0	0	100	55990.1	0	0	55990.1	61158.4	0	0	61158.4
27	Aira	Japan	Asia	Eastern Asia	31.7254	130.63	1975	2030	11	4	FULL	1	1	1	0	0	24.9203	24.9203	24.9203	24.9203	0	0	23.9226	23.9226	23.9226	23.9226	0	0	-0.997705	-0.997705	-0.997705	-0.997705	0	0	-0.0907004	-0.0907004	-0.0907004	-0.0907004	9.09091	0	0	68943.4	68943.4	68943.4	68943.4	52240.3	52240.3	52240.3	52240.3
29	Akhisar	Turkey	Asia	Western Asia	38.9215	27.8371	1985	2030	9	1	FULL	0	0	6	0	6	8.98116	0	0	8.98116	0	8.98116	16.9643	0	0	16.9643	0	16.9643	7.98312	0	0	7.98312	0	7.98312	0.887014	0	0	0.887014	0	0	66.6667	57038.5	0	0	57038.5	127949	0	0	127949
30	Akita	Japan	Asia	Eastern Asia	39.725	140.091	1975	2030	11	8	FULL	0	0	4	0	4	79.8496	0	0	79.8496	0	79.8496	91.8246	0	0	91.8246	0	91.8246	11.975	0	0	11.975	0	11.975	1.08864	0	0	1.08864	0	0	36.3636	183716	0	0	183716	195331	0	0	195331
31	Aksaray	Turkey	Asia	Western Asia	38.372	34.0205	1975	2030	11	1	FULL	0	2	3	2	1	15.9656	0	8.36039	15.9656	8.36039	7.60516	19.9566	0	10.9074	19.9566	10.9074	9.04916	3.99104	0	2.54705	3.99104	2.54705	1.444	0.362822	0	0.23155	0.362822	0	18.1818	9.09091	55054.1	0	37764.5	55054.1	145128	0	85295.4	145128
32	Al	Turkey	Asia	Western Asia	38.0721	40.0456	2005	2030	5	1	FULL	0	0	3	0	3	6.98479	0	0	6.98479	0	6.98479	9.97784	0	0	9.97784	0	9.97784	2.99305	0	0	2.99305	0	2.99305	0.598611	0	0	0.598611	0	0	60	67060.5	0	0	67060.5	114372	0	0	114372
33	Al `Udayn	Yemen	Asia	Western Asia	13.968	44.0067	1995	2030	7	1	PARTIAL	0	0	2	0	2	2.98071	0	0	2.98071	0	2.98071	10.9306	0	0	5.6633	0	5.6633	7.94985	0	0	2.68259	0	2.68259	1.13569	0	0	0.383227	0	0	28.5714	59258.7	0	0	59258.7	184263	0	0	160929
34	Al Beidha	Yemen	Asia	Western Asia	13.9889	45.5723	2020	2030	2	1	FULL	0	0	1	0	1	8.9402	0	0	8.9402	0	8.9402	10.9267	0	0	10.9267	0	10.9267	1.98653	0	0	1.98653	0	1.98653	0.993264	0	0	0.993264	0	0	50	54301.8	0	0	54301.8	68565	0	0	68565
36	Al Hidab	Yemen	Asia	Western Asia	17.0649	43.6013	2015	2030	3	1	FULL	0	0	1	0	1	3.9768	0	0	3.9768	0	3.9768	5.96519	0	0	5.96519	0	5.96519	1.98839	0	0	1.98839	0	1.98839	0.662795	0	0	0.662795	0	0	33.3333	52574.1	0	0	52574.1	64394.6	0	0	64394.6
37	Al Husaydhiah	Yemen	Asia	Western Asia	14.3526	43.3151	2010	2030	4	2	FULL	0	0	2	0	2	5.96484	0	0	5.96484	0	5.96484	13.917	0	0	13.917	0	13.917	7.95213	0	0	7.95213	0	7.95213	1.98803	0	0	1.98803	0	0	50	55437.3	0	0	55437.3	85180.9	0	0	85180.9
39	Al Jarrahi	Yemen	Asia	Western Asia	14.1343	43.3943	1995	2030	7	2	FULL	0	0	3	0	3	5.96436	0	0	5.96436	0	5.96436	9.94069	0	0	9.94069	0	9.94069	3.97633	0	0	3.97633	0	3.97633	0.568048	0	0	0.568048	0	0	42.8571	57044.4	0	0	57044.4	133684	0	0	133684
40	Al Khabt	Yemen	Asia	Western Asia	15.4752	43.3275	2025	2030	1	1	FULL	0	0	0	0	0	2.98275	0	0	2.98275	0	2.98275	2.98275	0	0	2.98275	0	2.98275	0	0	0	0	0	0	0	0	0	0	0	0	0	51848.1	0	0	51848.1	57428.7	0	0	57428.7
42	Al Mahabishah	Yemen	Asia	Western Asia	15.9464	43.4227	2000	2030	6	1	FULL	0	0	2	0	2	11.9309	0	0	11.9309	0	11.9309	15.9075	0	0	15.9075	0	15.9075	3.9766	0	0	3.9766	0	3.9766	0.662767	0	0	0.662767	0	0	33.3333	77697.7	0	0	77697.7	155645	0	0	155645
44	Al Marawi`ah	Yemen	Asia	Western Asia	14.8317	43.1544	2000	2030	6	1	PARTIAL	0	0	0	0	0	5.96611	0	0	3.39752	0	3.39752	6.96025	0	0	3.4717	0	3.4717	0.994139	0	0	0	0	0	0.16569	0	0	0	0	0	0	53258.4	0	0	33620.5	108875	0	0	69111.6
45	Al Mirqab	Yemen	Asia	Western Asia	14.4181	43.9132	2015	2030	3	1	FULL	0	0	0	0	0	1.98735	0	0	1.98735	0	1.98735	1.98735	0	0	1.98735	0	1.98735	0	0	0	0	0	0	0	0	0	0	0	0	0	54075.6	0	0	54075.6	71011.2	0	0	71011.2
46	Al Mu`ayinah	Yemen	Asia	Western Asia	15.4629	43.5096	2005	2030	5	1	FULL	0	0	0	0	0	3.97634	0	0	3.97634	0	3.97634	3.97634	0	0	3.97634	0	3.97634	0	0	0	0	0	0	0	0	0	0	0	0	0	55051.6	0	0	55051.6	97383.4	0	0	97383.4
47	Al Qaflah	Yemen	Asia	Western Asia	16.3167	43.7825	2025	2030	1	1	FULL	0	0	0	0	0	7.95181	0	0	7.95181	0	7.95181	7.95181	0	0	7.95181	0	7.95181	0	0	0	0	0	0	0	0	0	0	0	0	0	50578	0	0	50578	53780.7	0	0	53780.7
49	Alaba Kulito	Ethiopia	Africa	Eastern Africa	7.30807	38.0901	1975	2030	11	6	FULL	0	4	4	4	0	5.95783	0	5.95783	5.95783	5.95783	0	11.9157	0	11.9157	11.9157	11.9157	0	5.95785	0	5.95785	5.95785	5.95785	0	0.541622	0	0.541622	0.541622	0	36.3636	0	84007.2	0	84007.2	84007.2	178346	0	178346	178346
50	Alamata	Ethiopia	Africa	Eastern Africa	12.4178	39.562	2000	2030	6	4	FULL	0	0	4	0	4	6.95262	0	0	6.95262	0	6.95262	10.9252	0	0	10.9252	0	10.9252	3.97261	0	0	3.97261	0	3.97261	0.662101	0	0	0.662101	0	0	66.6667	59789.9	0	0	59789.9	101849	0	0	101849
51	Alasehir	Turkey	Asia	Western Asia	38.3521	28.5205	2010	2030	4	1	FULL	0	0	0	0	0	8.9826	0	8.9826	8.9826	8.9826	0	8.9826	0	8.9826	8.9826	8.9826	0	0	0	0	0	0	0	0	0	0	0	0	0	0	54234.6	0	54234.6	54234.6	72233.1	0	72233.1	72233.1
52	Albano Laziale	Italy	Europe	Southern Europe	41.7214	12.6687	2020	2030	2	1	FULL	0	0	0	0	0	17.988	17.988	17.988	17.988	0	0	17.988	17.988	17.988	17.988	0	0	0	0	0	0	0	0	0	0	0	0	0	0	0	52705	52705	52705	52705	53477.1	53477.1	53477.1	53477.1
53	Aleta Wendo	Ethiopia	Africa	Eastern Africa	6.60515	38.4223	1975	2030	11	4	FULL	0	0	6	0	6	3.97115	0	0	3.97115	0	3.97115	15.8842	0	0	15.8842	0	15.8842	11.913	0	0	11.913	0	11.913	1.083	0	0	1.083	0	0	54.5455	76805.2	0	0	76805.2	161697	0	0	161697
55	Ali Sabieh	Djibouti	Africa	Eastern Africa	11.1532	42.7066	2000	2030	6	1	FULL	0	0	0	0	0	4.97286	0	0	4.97286	0	4.97286	4.97286	0	0	4.97286	0	4.97286	0	0	0	0	0	0	0	0	0	0	0	0	0	61307.4	0	0	61307.4	91190.2	0	0	91190.2
57	Almoloya de JuÃ¡rez	Mexico	North America	Central America	19.355	-99.7494	2020	2030	2	4	FULL	0	1	1	1	0	19.8827	0	19.4368	19.8827	19.4368	0	20.8768	0	20.4309	20.8768	20.4309	0	0.99414	0	0.99414	0.99414	0.99414	0	0.49707	0	0.49707	0.49707	0	50	0	55732.6	0	54823.3	55732.6	65056.4	0	64086.7	65056.4
58	Amadeo	Philippines	Asia	South-Eastern Asia	14.1321	120.96	2025	2030	1	3	FULL	0	1	1	1	0	30.8293	0	30.8293	30.8293	30.8293	0	35.801	0	35.801	35.801	35.801	0	4.97177	0	4.97177	4.97177	4.97177	0	4.97177	0	4.97177	4.97177	0	100	0	75412.7	0	75412.7	75412.7	91233.7	0	91233.7	91233.7
59	Ambano	Madagascar	Africa	Eastern Africa	-19.7632	47.0571	2000	2030	6	2	FULL	0	4	4	4	0	49.7592	0	49.7592	49.7592	49.7592	0	81.6056	0	81.6056	81.6056	81.6056	0	31.8464	0	31.8464	31.8464	31.8464	0	5.30773	0	5.30773	5.30773	0	66.6667	0	98127.7	0	98127.7	98127.7	231762	0	231762	231762
60	Ambarawa	Indonesia	Asia	South-Eastern Asia	-7.25742	110.404	1975	2030	11	6	FULL	0	3	3	3	0	12.9068	0	12.9068	12.9068	12.9068	0	21.8422	0	21.8422	21.8422	21.8422	0	8.93542	0	8.93542	8.93542	8.93542	0	0.812311	0	0.812311	0.812311	0	27.2727	0	85102.6	0	85102.6	85102.6	77049.2	0	77049.2	77049.2
61	Ambato	Ecuador	South America	South America	-1.25402	-78.6263	1975	2030	11	11	FULL	0	7	8	7	6	30.8249	0	10.2153	30.8249	10.2153	20.6097	68.6037	0	35.8649	68.6037	35.8649	32.7388	37.7787	0	25.6496	37.7787	25.6496	12.1291	3.43443	0	2.33178	3.43443	0	63.6364	54.5455	82765.9	0	22283.4	82765.9	291142	0	115948	291142
62	Amol	Iran	Asia	Southern Asia	36.4684	52.358	1980	2030	10	1	FULL	0	0	8	0	8	21.9468	0	0	21.9468	0	21.9468	43.8927	0	0	43.8927	0	43.8927	21.9459	0	0	21.9459	0	21.9459	2.19459	0	0	2.19459	0	0	80	62248.2	0	0	62248.2	181054	0	0	181054
63	Ampana	Indonesia	Asia	South-Eastern Asia	-0.868861	121.58	2015	2030	3	1	FULL	0	0	0	0	0	13.9038	0	0	13.9038	0	13.9038	13.9038	0	0	13.9038	0	13.9038	0	0	0	0	0	0	0	0	0	0	0	0	0	51348.5	0	0	51348.5	57249.5	0	0	57249.5
64	Amurang	Indonesia	Asia	South-Eastern Asia	1.19903	124.583	2015	2030	3	6	FULL	0	0	0	0	0	15.8926	0	15.8926	15.8926	15.8926	0	15.8926	0	15.8926	15.8926	15.8926	0	0	0	0	0	0	0	0	0	0	0	0	0	0	52058.6	0	52058.6	52058.6	57768.7	0	57768.7	57768.7
65	An Nadirah	Yemen	Asia	Western Asia	14.1005	44.4719	2020	2030	2	1	FULL	0	0	0	0	0	4.96695	0	0	4.96695	0	4.96695	4.96695	0	0	4.96695	0	4.96695	0	0	0	0	0	0	0	0	0	0	0	0	0	53171.5	0	0	53171.5	59194.8	0	0	59194.8
68	Angeles	Philippines	Asia	South-Eastern Asia	15.1487	120.606	1975	2030	11	1	FULL	0	9	10	9	9	64.6787	0	48.1504	64.6787	48.1504	16.5283	322.373	0	97.8201	322.373	97.8201	224.552	257.694	0	49.6697	257.694	49.6697	208.024	23.4267	0	4.51543	23.4267	0	81.8182	81.8182	214015	0	143568	214015	1.65603e+06	0	622028	1.65603e+06
69	Antananarivo	Madagascar	Africa	Eastern Africa	-18.8789	47.5405	1975	2030	11	1	PARTIAL	0	0	11	0	11	66.7107	0	0	66.7107	0	66.7107	473.932	0	0	454.171	0	454.171	407.222	0	0	387.461	0	387.461	37.0201	0	0	35.2237	0	0	100	290641	0	0	290641	5.24773e+06	0	0	5.19256e+06
70	Antigua Guatemala	Guatemala	North America	Central America	14.5686	-90.7395	2000	2030	6	15	FULL	2	2	2	0	0	12.9323	3.2628	12.9323	12.9323	9.66947	0	24.8695	15.2	24.8695	24.8695	9.66947	0	11.9372	11.9372	11.9372	11.9372	0	0	1.98954	1.98954	1.98954	1.98954	33.3333	0	0	52128.3	9328.63	52128.3	52128.3	111146	59748.2	111146	111146
72	Antsirabe	Madagascar	Africa	Eastern Africa	-19.8599	47.0356	2020	2030	2	2	FULL	0	1	1	1	0	17.9127	8.50032	17.9127	17.9127	9.41239	0	19.9035	8.5043	19.9035	19.9035	11.3992	0	1.99081	0	1.99081	1.99081	1.98683	0	0.995404	0	0.995404	0.995404	0	50	0	53726.2	31289.2	53726.2	53726.2	56394.8	31691.7	56394.8	56394.8
73	Antsiranana	Madagascar	Africa	Eastern Africa	-12.2934	49.2939	2015	2030	3	1	FULL	0	0	3	0	3	24.8487	0	0	24.8487	0	24.8487	28.8241	0	0	28.8241	0	28.8241	3.9754	0	0	3.9754	0	3.9754	1.32513	0	0	1.32513	0	0	100	51805	0	0	51805	123177	0	0	123177
74	Anzio	Italy	Europe	Southern Europe	41.4756	12.6265	2010	2030	4	1	FULL	0	1	1	1	0	37.9748	0	3.13819	37.9748	3.13819	34.8366	38.9736	0	4.10268	38.9736	4.10268	34.8709	0.998746	0	0.96449	0.998746	0.96449	0	0.249687	0	0.241122	0.249687	0	25	0	72916.2	0	6534.82	72916.2	87130.6	0	9260.28	87130.6
75	Aomori	Japan	Asia	Eastern Asia	40.8221	140.749	1975	2030	11	6	FULL	0	3	3	3	0	49.9118	0	49.9118	49.9118	49.9118	0	56.899	0	56.899	56.899	56.899	0	6.9872	0	6.9872	6.9872	6.9872	0	0.6352	0	0.6352	0.6352	0	27.2727	0	152058	0	152058	152058	164592	0	164592	164592
76	Apalit	Philippines	Asia	South-Eastern Asia	14.9613	120.772	2000	2030	6	1	FULL	0	0	2	0	2	15.9174	0	0	15.9174	0	15.9174	17.907	0	0	17.907	0	17.907	1.98963	0	0	1.98963	0	1.98963	0.331606	0	0	0.331606	0	0	33.3333	55252.7	0	0	55252.7	98389.9	0	0	98389.9
77	Apizaco	Mexico	North America	Central America	19.4143	-98.1463	1980	2030	10	9	FULL	0	5	5	5	0	15.9077	0	15.9077	15.9077	15.9077	0	31.815	0	31.815	31.815	31.815	0	15.9073	0	15.9073	15.9073	15.9073	0	1.59073	0	1.59073	1.59073	0	50	0	53650.2	0	53650.2	53650.2	131065	0	131065	131065
78	Ar Rijad	Yemen	Asia	Western Asia	14.0997	44.185	1990	2030	8	1	FULL	0	0	4	0	4	9.93496	0	0	9.93496	0	9.93496	18.877	0	0	18.877	0	18.877	8.94201	0	0	8.94201	0	8.94201	1.11775	0	0	1.11775	0	0	50	56267.8	0	0	56267.8	173624	0	0	173624
79	Ar Rubu`	Yemen	Asia	Western Asia	14.0686	44.0939	2010	2030	4	1	FULL	0	0	2	0	2	9.93537	0	0	9.93537	0	9.93537	12.9157	0	0	12.9157	0	12.9157	2.98037	0	0	2.98037	0	2.98037	0.745092	0	0	0.745092	0	0	50	56538.7	0	0	56538.7	81215.6	0	0	81215.6
81	Arayat	Philippines	Asia	South-Eastern Asia	15.148	120.785	2000	2030	6	1	FULL	0	0	2	0	2	20.8909	0	0	20.8909	0	20.8909	24.871	0	0	24.871	0	24.871	3.9801	0	0	3.9801	0	3.9801	0.66335	0	0	0.66335	0	0	33.3333	52249.7	0	0	52249.7	95597.2	0	0	95597.2
82	Arba Minch	Ethiopia	Africa	Eastern Africa	6.02038	37.5523	1975	2030	11	1	FULL	0	0	7	0	7	10.9262	0	0	10.9262	0	10.9262	20.8589	0	0	20.8589	0	20.8589	9.93274	0	0	9.93274	0	9.93274	0.902976	0	0	0.902976	0	0	63.6364	56332.6	0	0	56332.6	190223	0	0	190223
83	Arbe Gona	Ethiopia	Africa	Eastern Africa	6.68867	38.7179	1990	2030	8	4	FULL	0	0	1	0	1	4.96364	0	0	4.96364	0	4.96364	6.94896	0	0	6.94896	0	6.94896	1.98533	0	0	1.98533	0	1.98533	0.248166	0	0	0.248166	0	0	12.5	63593.3	0	0	63593.3	94634.1	0	0	94634.1
84	Areka	Ethiopia	Africa	Eastern Africa	7.06741	37.7084	1975	2030	11	3	FULL	0	0	5	0	5	3.97285	0	0	3.97285	0	3.97285	12.9119	0	0	12.9119	0	12.9119	8.93903	0	0	8.93903	0	8.93903	0.81264	0	0	0.81264	0	0	45.4545	71387	0	0	71387	119658	0	0	119658
85	Arequipa	Peru	South America	South America	-16.4076	-71.5198	1975	2030	11	6	FULL	0	9	9	9	0	54.7445	0	54.7445	54.7445	54.7445	0	167.226	0	167.226	167.226	167.226	0	112.481	0	112.481	112.481	112.481	0	10.2256	0	10.2256	10.2256	0	81.8182	0	265155	0	265155	265155	1.06653e+06	0	1.06653e+06	1.06653e+06
87	Arica	Chile	South America	South America	-18.4817	-70.2984	1975	2030	11	2	FULL	0	0	4	0	4	15.9089	0	0	15.9089	0	15.9089	34.8012	0	0	34.8012	0	34.8012	18.8923	0	0	18.8923	0	18.8923	1.71748	0	0	1.71748	0	0	36.3636	76522.1	0	0	76522.1	120971	0	0	120971
88	Arjawinangun	Indonesia	Asia	South-Eastern Asia	-6.61597	108.398	1990	2030	8	7	FULL	0	2	2	2	2	23.8733	0	7.1032	23.8733	7.1032	16.7701	45.7578	0	27.3424	45.7578	27.3424	18.4154	21.8845	0	20.2392	21.8845	20.2392	1.64531	2.73556	0	2.5299	2.73556	0	25	25	74638.8	0	25080.5	74638.8	153285	0	93587.8	153285
89	Armenia	Colombia	South America	South America	4.53293	-75.6841	1975	2030	11	6	FULL	0	1	6	1	6	23.8256	0	0	23.8256	0	23.8256	34.7455	0	1.39421	34.7455	1.39421	33.3513	10.9199	0	1.39421	10.9199	1.39421	9.5257	0.992719	0	0.126746	0.992719	0	9.09091	54.5455	159844	0	0	159844	329472	0	2181.56	329472
100	Arsi Negelle	Ethiopia	Africa	Eastern Africa	7.35337	38.6733	1975	2030	11	8	FULL	0	7	7	7	0	7.94203	0	7.94203	7.94203	7.94203	0	20.8476	0	20.8476	20.8476	20.8476	0	12.9056	0	12.9056	12.9056	12.9056	0	1.17323	0	1.17323	1.17323	0	63.6364	0	74003.3	0	74003.3	74003.3	256992	0	256992	256992
101	Arusha	Tanzania	Africa	Eastern Africa	-3.36142	36.6836	1980	2030	10	2	FULL	0	10	10	10	0	31.8139	0	31.8139	31.8139	31.8139	0	198.829	0	198.829	198.829	198.829	0	167.016	0	167.016	167.016	167.016	0	16.7016	0	16.7016	16.7016	0	100	0	67149.5	0	67149.5	67149.5	1003326	0	1003326	1003326
102	As Saddah	Yemen	Asia	Western Asia	14.1139	44.4265	2025	2030	1	1	FULL	0	0	0	0	0	11.921	0	0	11.921	0	11.921	11.921	0	0	11.921	0	11.921	0	0	0	0	0	0	0	0	0	0	0	0	0	61165.5	0	0	61165.5	67897.3	0	0	67897.3
104	As Suwayda	Syria	Asia	Western Asia	32.7015	36.5748	2025	2030	1	1	PARTIAL	0	0	0	0	0	23.9441	0	0	1.67154	0	1.67154	23.9441	0	0	1.67154	0	1.67154	0	0	0	0	0	0	0	0	0	0	0	0	0	128546	0	0	4523.07	141755	0	0	4978.58
105	Asahikawa	Japan	Asia	Eastern Asia	43.7802	142.379	1975	2030	11	3	FULL	0	0	4	0	4	66.9448	0	0	66.9448	0	66.9448	89.9341	0	0	89.9341	0	89.9341	22.9893	0	0	22.9893	0	22.9893	2.08994	0	0	2.08994	0	0	36.3636	213372	0	0	213372	274507	0	0	274507
106	Asassa	Ethiopia	Africa	Eastern Africa	7.10256	39.1956	1975	2030	11	5	FULL	0	0	5	0	5	5.95637	0	0	5.95637	0	5.95637	12.9054	0	0	12.9054	0	12.9054	6.94902	0	0	6.94902	0	6.94902	0.631729	0	0	0.631729	0	0	45.4545	59046.4	0	0	59046.4	127056	0	0	127056
107	Asella	Ethiopia	Africa	Eastern Africa	7.95459	39.1319	1975	2030	11	10	FULL	4	8	8	6	0	11.9133	5.62488	11.9133	11.9133	6.28842	0	23.8272	11.1865	23.8272	23.8272	12.6406	0	11.9139	5.56166	11.9139	11.9139	6.35222	0	1.08308	0.505605	1.08308	1.08308	36.3636	54.5455	0	50381.9	25982.3	50381.9	50381.9	229561	102011	229561	229561
108	Asembagus	Indonesia	Asia	South-Eastern Asia	-7.74303	114.206	1995	2030	7	5	FULL	0	2	2	2	0	25.8711	0	25.8711	25.8711	25.8711	0	27.8612	0	27.8612	27.8612	27.8612	0	1.9901	0	1.9901	1.9901	1.9901	0	0.2843	0	0.2843	0.2843	0	28.5714	0	65802.3	0	65802.3	65802.3	64894.9	0	64894.9	64894.9
109	Assab	Eritrea	Africa	Eastern Africa	13.0131	42.7423	2005	2030	5	5	FULL	0	0	1	0	1	9.9465	0	0	9.9465	0	9.9465	10.9412	0	0	10.9412	0	10.9412	0.994659	0	0	0.994659	0	0.994659	0.198932	0	0	0.198932	0	0	20	53484.6	0	0	53484.6	72299.5	0	0	72299.5
110	At Tuhayta	Yemen	Asia	Western Asia	14.1848	43.224	2000	2030	6	2	FULL	0	0	0	0	0	3.97685	0	0	3.97685	0	3.97685	3.97685	0	0	3.97685	0	3.97685	0	0	0	0	0	0	0	0	0	0	0	0	0	50214.6	0	0	50214.6	86635.6	0	0	86635.6
111	Ataye	Ethiopia	Africa	Eastern Africa	10.3455	39.959	1990	2030	8	4	FULL	0	0	2	0	2	6.95248	0	0	6.95248	0	6.95248	8.93884	0	0	8.93884	0	8.93884	1.98636	0	0	1.98636	0	1.98636	0.248295	0	0	0.248295	0	0	25	53555.5	0	0	53555.5	60223.3	0	0	60223.3
112	Ath Thuluth	Yemen	Asia	Western Asia	14.4713	44.0113	2005	2030	5	1	FULL	0	0	0	0	0	3.97448	0	0	3.97448	0	3.97448	3.97448	0	0	3.97448	0	3.97448	0	0	0	0	0	0	0	0	0	0	0	0	0	57422.6	0	0	57422.6	124427	0	0	124427
113	Athens	Greece	Europe	Southern Europe	37.9917	23.7396	1975	2030	11	1	FULL	0	0	6	0	6	391.605	0	0	391.605	0	391.605	411.583	0	0	411.583	0	411.583	19.9781	0	0	19.9781	0	19.9781	1.8162	0	0	1.8162	0	0	54.5455	2.93101e+06	0	0	2.93101e+06	3.14739e+06	0	0	3.14739e+06
114	Atlixco	Mexico	North America	Central America	18.9088	-98.4329	1995	2030	7	4	FULL	0	2	2	2	0	11.9282	0	11.9282	11.9282	11.9282	0	15.9045	0	15.9045	15.9045	15.9045	0	3.97628	0	3.97628	3.97628	3.97628	0	0.56804	0	0.56804	0.56804	0	28.5714	0	53469.7	0	53469.7	53469.7	67059	0	67059	67059
115	Auburn	United States of America	North America	Northern America	47.2948	-122.218	2020	2030	2	1	FULL	0	0	1	0	1	35.9926	0	0	35.9926	0	35.9926	36.9922	0	0	36.9922	0	36.9922	0.9996	0	0	0.9996	0	0.9996	0.4998	0	0	0.4998	0	0	50	59229.8	0	0	59229.8	65199.2	0	0	65199.2
116	Auckland	New Zealand	Oceania	Australia and New Zealand	-36.8955	174.796	1975	2030	11	1	FULL	2	10	10	10	0	514.104	263.031	514.104	514.104	251.072	0	636.9	275.477	636.9	636.9	361.423	0	122.797	12.446	122.797	122.797	110.351	0	11.1633	1.13146	11.1633	11.1633	18.1818	90.9091	0	613558	316526	613558	613558	1.68722e+06	788312	1.68722e+06	1.68722e+06
118	Avellino	Italy	Europe	Southern Europe	40.9158	14.7986	1985	2030	9	3	FULL	0	1	2	1	2	10.981	0	0	10.981	0	10.981	21.9626	0	5.41847	21.9626	5.41847	16.5441	10.9816	0	5.41847	10.9816	5.41847	5.56309	1.22017	0	0.602052	1.22017	0	11.1111	22.2222	50636.7	0	0	50636.7	70862.2	0	11443	70862.2
119	Aydin	Turkey	Asia	Western Asia	37.8432	27.8354	1990	2030	8	1	PARTIAL	0	0	2	0	2	14.9653	0	0	1.85786	0	1.85786	28.9336	0	0	6.38309	0	6.38309	13.9683	0	0	4.52523	0	4.52523	1.74604	0	0	0.565654	0	0	25	110124	0	0	2429.31	276078	0	0	24095.6
120	Az Zaydiyah	Yemen	Asia	Western Asia	15.3317	43.008	2005	2030	5	1	FULL	0	0	0	0	0	3.97826	0	0	3.97826	0	3.97826	3.97826	0	0	3.97826	0	3.97826	0	0	0	0	0	0	0	0	0	0	0	0	0	55549.6	0	0	55549.6	91442.5	0	0	91442.5
121	Ba'dan	Yemen	Asia	Western Asia	13.9878	44.3808	2025	2030	1	1	FULL	0	0	1	0	1	6.95379	0	0	6.95379	0	6.95379	7.94718	0	0	7.94718	0	7.94718	0.993393	0	0	0.993393	0	0.993393	0.993393	0	0	0.993393	0	0	100	50424.2	0	0	50424.2	55195.8	0	0	55195.8
122	Babahoyo	Ecuador	South America	South America	-1.80367	-79.5255	1985	2030	9	2	FULL	0	0	2	0	2	11.9181	0	0	11.9181	0	11.9181	13.9048	0	0	13.9048	0	13.9048	1.98668	0	0	1.98668	0	1.98668	0.220743	0	0	0.220743	0	0	22.2222	54183.1	0	0	54183.1	109721	0	0	109721
123	Babol	Iran	Asia	Southern Asia	36.5483	52.6787	1975	2030	11	1	FULL	0	0	9	0	9	17.9599	0	0	17.9599	0	17.9599	45.8986	0	0	45.8986	0	45.8986	27.9387	0	0	27.9387	0	27.9387	2.53988	0	0	2.53988	0	0	81.8182	58796.4	0	0	58796.4	229146	0	0	229146
124	Bacolod	Philippines	Asia	South-Eastern Asia	10.6582	122.953	1975	2030	11	1	FULL	0	3	8	3	8	75.457	0	2.96871	75.457	2.96871	72.4883	130.069	0	17.5217	130.069	17.5217	112.548	54.6123	0	14.553	54.6123	14.553	40.0593	4.96476	0	1.323	4.96476	0	27.2727	72.7273	237063	0	10291.8	237063	747375	0	85320.9	747375
125	Bafoussam	Cameroon	Africa	Middle Africa	5.48423	10.413	1975	2030	11	1	FULL	0	0	6	0	6	34.7633	0	0	34.7633	0	34.7633	59.5942	0	0	59.5942	0	59.5942	24.8309	0	0	24.8309	0	24.8309	2.25736	0	0	2.25736	0	0	54.5455	147811	0	0	147811	342537	0	0	342537
126	Bagelen	Indonesia	Asia	South-Eastern Asia	-5.37639	105.098	1975	2030	11	3	FULL	0	0	4	0	4	8.93384	0	0	8.93384	0	8.93384	31.764	0	0	31.764	0	31.764	22.8302	0	0	22.8302	0	22.8302	2.07547	0	0	2.07547	0	0	36.3636	55456.7	0	0	55456.7	123914	0	0	123914
128	BahÃ­a de Banderas	United States of America	North America	Northern America	20.762	-105.233	2025	2030	1	3	FULL	0	0	1	0	1	9.942	0	0	9.942	0	9.942	10.9362	0	0	10.9362	0	10.9362	0.994175	0	0	0.994175	0	0.994175	0.994175	0	0	0.994175	0	0	100	68070	0	0	68070	74579.3	0	0	74579.3
129	Baishan	China	Asia	Eastern Asia	41.9381	126.429	1975	2030	11	1	FULL	0	0	7	0	7	10.9953	0	0	10.9953	0	10.9953	36.9854	0	0	36.9854	0	36.9854	25.99	0	0	25.99	0	25.99	2.36273	0	0	2.36273	0	0	63.6364	128244	0	0	128244	646317	0	0	646317
133	Baksan	Russia	Europe	Eastern Europe	43.6795	43.5411	1975	2030	11	1	FULL	0	0	2	0	2	16.9869	0	0	16.9869	0	16.9869	15.9877	0	0	15.9877	0	15.9877	-0.999216	0	0	-0.999216	0	-0.999216	-0.0908378	0	0	-0.0908378	0	0	18.1818	62646	0	0	62646	54812.4	0	0	54812.4
134	Balanga	Philippines	Asia	South-Eastern Asia	14.6762	120.552	1985	2030	9	3	FULL	0	0	5	0	5	20.8968	0	0	20.8968	0	20.8968	30.8475	0	0	30.8475	0	30.8475	9.95068	0	0	9.95068	0	9.95068	1.10563	0	0	1.10563	0	0	55.5556	61928.9	0	0	61928.9	135382	0	0	135382
136	Balingasag	Philippines	Asia	South-Eastern Asia	8.74179	124.779	2025	2030	1	2	FULL	0	0	1	0	1	25.8391	0	0	25.8391	0	25.8391	41.7394	0	0	41.7394	0	41.7394	15.9002	0	0	15.9002	0	15.9002	15.9002	0	0	15.9002	0	0	100	59875.3	0	0	59875.3	98049.7	0	0	98049.7
137	Baloi	Philippines	Asia	South-Eastern Asia	8.11527	124.217	2025	2030	1	3	FULL	0	0	1	0	1	7.94553	0	0	7.94553	0	7.94553	8.93896	0	0	8.93896	0	8.93896	0.993431	0	0	0.993431	0	0.993431	0.993431	0	0	0.993431	0	0	100	50267.6	0	0	50267.6	60558.9	0	0	60558.9
138	Balung	Indonesia	Asia	South-Eastern Asia	-8.31928	113.564	1975	2030	11	7	FULL	0	2	6	2	6	35.8117	0	0	35.8117	0	35.8117	136.284	0	3.18971	136.284	3.18971	133.094	100.472	0	3.18971	100.472	3.18971	97.2822	9.13381	0	0.289973	9.13381	0	18.1818	54.5455	187856	0	0	187856	427087	0	5841.36	427087
139	Bamban	Philippines	Asia	South-Eastern Asia	15.2805	120.562	2005	2030	5	1	FULL	0	0	1	0	1	11.942	0	11.5396	11.942	11.5396	0	13.9329	0	11.7134	13.9329	11.7134	2.21945	1.99087	0	0	1.99087	0	2.21945	0.398175	0	0	0.398175	0	0	20	52694.8	0	52382.9	52694.8	64597.6	0	61239.1	64597.6
140	Bamenda	Cameroon	Africa	Middle Africa	5.95861	10.1558	1975	2030	11	1	FULL	0	0	9	0	9	34.7572	0	0	34.7572	0	34.7572	81.4295	0	0	81.4295	0	81.4295	46.6723	0	0	46.6723	0	46.6723	4.24294	0	0	4.24294	0	0	81.8182	138540	0	0	138540	418217	0	0	418217
141	Bandar Lampung	Indonesia	Asia	South-Eastern Asia	-5.414	105.268	1975	2030	11	2	FULL	0	0	10	0	10	46.6528	0	0	46.6528	0	46.6528	175.697	0	0	175.697	0	175.697	129.044	0	0	129.044	0	129.044	11.7313	0	0	11.7313	0	0	90.9091	143396	0	0	143396	1.36465e+06	0	0	1.36465e+06
142	Bandung	Indonesia	Asia	South-Eastern Asia	-6.92514	107.628	1975	2030	11	12	FULL	10	11	11	11	0	536.186	45.6467	536.186	536.186	490.54	0	1025.65	109.755	1025.65	1025.65	915.89	0	489.459	64.1085	489.459	489.459	425.35	0	44.4962	5.82805	44.4962	44.4962	90.9091	100	0	3.45905e+06	182810	3.45905e+06	3.45905e+06	8977864	560098	8977864	8977864
143	Bangkalan	Indonesia	Asia	South-Eastern Asia	-7.02519	112.751	1975	2030	11	2	FULL	0	0	3	0	3	16.8917	0	0	16.8917	0	16.8917	18.8788	0	0	18.8788	0	18.8788	1.98711	0	0	1.98711	0	1.98711	0.180646	0	0	0.180646	0	0	27.2727	123253	0	0	123253	74327.3	0	0	74327.3
146	Bangkinang	Indonesia	Asia	South-Eastern Asia	0.33795	101.021	1975	2030	11	1	PARTIAL	0	0	5	0	5	6.95629	0	0	3.24528	0	3.24528	24.8437	0	0	13.8675	0	13.8675	17.8874	0	0	10.6223	0	10.6223	1.62613	0	0	0.96566	0	0	45.4545	67305.3	0	0	23070.3	183361	0	0	76719
147	Bangko	Indonesia	Asia	South-Eastern Asia	-2.06731	102.277	1990	2030	8	1	FULL	0	0	4	0	4	10.9421	0	0	10.9421	0	10.9421	16.9114	0	0	16.9114	0	16.9114	5.96933	0	0	5.96933	0	5.96933	0.746166	0	0	0.746166	0	0	50	51656.1	0	0	51656.1	123568	0	0	123568
149	Banjar	Indonesia	Asia	South-Eastern Asia	-7.37288	108.54	1975	2030	11	8	FULL	0	0	5	0	5	12.9284	0	0	12.9284	0	12.9284	23.8691	0	0	23.8691	0	23.8691	10.9407	0	0	10.9407	0	10.9407	0.994609	0	0	0.994609	0	0	45.4545	82425.6	0	0	82425.6	128176	0	0	128176
150	Banjaran	Indonesia	Asia	South-Eastern Asia	-6.70096	108.351	1995	2030	7	8	FULL	0	1	1	1	0	18.9012	0	18.9012	18.9012	18.9012	0	20.8908	0	20.8908	20.8908	20.8908	0	1.98956	0	1.98956	1.98956	1.98956	0	0.284223	0	0.284223	0.284223	0	14.2857	0	57638.7	0	57638.7	57638.7	74462	0	74462	74462
151	Banjarmasin	Indonesia	Asia	South-Eastern Asia	-6.384	105.83	1975	2030	11	5	FULL	0	6	6	6	0	8.93532	0	8.93532	8.93532	8.93532	0	30.7795	0	30.7795	30.7795	30.7795	0	21.8442	0	21.8442	21.8442	21.8442	0	1.98583	0	1.98583	1.98583	0	54.5455	0	73986.9	0	73986.9	73986.9	138621	0	138621	138621
152	Banjarnegara	Indonesia	Asia	South-Eastern Asia	-7.39365	109.686	1975	2030	11	6	FULL	0	2	4	2	4	20.8579	0	10.7837	20.8579	10.7837	10.0742	39.7317	0	15.7256	39.7317	15.7256	24.0061	18.8738	0	4.94186	18.8738	4.94186	13.9319	1.7158	0	0.44926	1.7158	0	18.1818	36.3636	211700	0	153238	211700	171268	0	85630.3	171268
153	Banjarsari	Indonesia	Asia	South-Eastern Asia	-7.48522	108.609	1975	2030	11	6	FULL	0	0	3	0	3	6.96109	0	0	6.96109	0	6.96109	19.8886	0	0	19.8886	0	19.8886	12.9275	0	0	12.9275	0	12.9275	1.17523	0	0	1.17523	0	0	27.2727	57895.7	0	0	57895.7	72406.3	0	0	72406.3
156	Banyuwangi	Indonesia	Asia	South-Eastern Asia	-8.21322	114.369	1975	2030	11	5	FULL	0	3	3	3	0	28.8495	0	28.8495	28.8495	28.8495	0	44.771	0	44.771	44.771	44.771	0	15.9215	0	15.9215	15.9215	15.9215	0	1.44741	0	1.44741	1.44741	0	27.2727	0	244740	0	244740	244740	168373	0	168373	168373
157	Baoshan	China	Asia	Eastern Asia	25.1177	99.1672	1975	2030	11	1	FULL	0	0	7	0	7	11.939	0	0	11.939	0	11.939	81.5844	0	0	81.5844	0	81.5844	69.6454	0	0	69.6454	0	69.6454	6.3314	0	0	6.3314	0	0	63.6364	52039.6	0	0	52039.6	275987	0	0	275987
158	Barcelona	Spain	Europe	Southern Europe	41.4321	2.15249	1975	2030	11	1	PARTIAL	0	0	11	0	11	258.606	0	0	250.965	0	250.965	439.332	0	0	428.82	0	428.82	180.726	0	0	177.855	0	177.855	16.4296	0	0	16.1686	0	0	100	2.23209e+06	0	0	2.19835e+06	3948256	0	0	3.89762e+06
159	Basha	Ethiopia	Africa	Eastern Africa	7.0228	38.6059	2000	2030	6	6	FULL	0	3	4	3	2	3.97112	0	1.20742	3.97112	1.20742	2.7637	15.8841	0	7.53642	15.8841	7.53642	8.34768	11.913	0	6.32899	11.913	6.32899	5.58398	1.9855	0	1.05483	1.9855	0	50	33.3333	61862.1	0	2192.43	61862.1	120391	0	46832.3	120391
161	Batangas City	Philippines	Asia	South-Eastern Asia	13.7631	121.061	1975	2030	11	3	FULL	0	10	10	10	5	25.854	0	21.2486	25.854	21.2486	4.60542	119.327	0	88.5744	119.327	88.5744	30.7522	93.4725	0	67.3258	93.4725	67.3258	26.1467	8.4975	0	6.12053	8.4975	0	90.9091	45.4545	71172.9	0	57862	71172.9	464070	0	375787	464070
162	Bati	Ethiopia	Africa	Eastern Africa	11.1923	40.0133	1995	2030	7	1	FULL	0	0	1	0	1	3.97325	0	0	3.97325	0	3.97325	4.96662	0	0	4.96662	0	4.96662	0.993364	0	0	0.993364	0	0.993364	0.141909	0	0	0.141909	0	0	14.2857	57690.5	0	0	57690.5	81813.3	0	0	81813.3
163	Battipaglia	Italy	Europe	Southern Europe	40.6103	14.9745	1975	2030	11	3	FULL	0	0	2	0	2	12.9774	0	0	12.9774	0	12.9774	17.9679	0	0	17.9679	0	17.9679	4.99047	0	0	4.99047	0	4.99047	0.453679	0	0	0.453679	0	0	18.1818	50526.1	0	0	50526.1	59626.1	0	0	59626.1
164	Baturaja	Indonesia	Asia	South-Eastern Asia	-4.12001	104.173	1975	2030	11	2	FULL	0	0	4	0	4	11.9133	0	0	11.9133	0	11.9133	20.8482	0	0	20.8482	0	20.8482	8.93497	0	0	8.93497	0	8.93497	0.81227	0	0	0.81227	0	0	36.3636	108396	0	0	108396	105396	0	0	105396
165	Batusangkar	Indonesia	Asia	South-Eastern Asia	-0.455338	100.583	1975	2030	11	4	FULL	0	2	2	2	0	9.93269	0	9.93269	9.93269	9.93269	0	12.9126	0	12.9126	12.9126	12.9126	0	2.97991	0	2.97991	2.97991	2.97991	0	0.270901	0	0.270901	0.270901	0	18.1818	0	57169.6	0	57169.6	57169.6	55926.2	0	55926.2	55926.2
166	Bayambang	Philippines	Asia	South-Eastern Asia	15.8167	120.467	2015	2030	3	1	FULL	0	0	2	0	2	20.9027	0	0	20.9027	0	20.9027	35.8325	0	0	35.8325	0	35.8325	14.9298	0	0	14.9298	0	14.9298	4.97659	0	0	4.97659	0	0	66.6667	53261.9	0	0	53261.9	92339.6	0	0	92339.6
167	Bayhan	Yemen	Asia	Western Asia	14.8017	45.7163	2025	2030	1	1	FULL	0	0	0	0	0	5.9611	0	0	5.9611	0	5.9611	5.9611	0	0	5.9611	0	5.9611	0	0	0	0	0	0	0	0	0	0	0	0	0	51714.6	0	0	51714.6	56044.5	0	0	56044.5
168	Bayt al Faqih	Yemen	Asia	Western Asia	14.5163	43.3246	1975	2030	11	1	FULL	0	0	1	0	1	5.96489	0	0	5.96489	0	5.96489	6.95921	0	0	6.95921	0	6.95921	0.994326	0	0	0.994326	0	0.994326	0.0903933	0	0	0.0903933	0	0	9.09091	57260.2	0	0	57260.2	150290	0	0	150290
169	Bayt al Kabsh	Yemen	Asia	Western Asia	15.2606	43.9324	2020	2030	2	1	FULL	0	0	0	0	0	5.96253	0	0	5.96253	0	5.96253	5.96253	0	0	5.96253	0	5.96253	0	0	0	0	0	0	0	0	0	0	0	0	0	50818.9	0	0	50818.9	61417.9	0	0	61417.9
170	Bedessa	Ethiopia	Africa	Eastern Africa	8.89905	40.7772	1990	2030	8	3	FULL	0	0	3	0	3	7.95013	0	0	7.95013	0	7.95013	10.9316	0	0	10.9316	0	10.9316	2.98144	0	0	2.98144	0	2.98144	0.37268	0	0	0.37268	0	0	37.5	57703.4	0	0	57703.4	68581.3	0	0	68581.3
171	Bei'an	China	Asia	Eastern Asia	48.2428	126.498	1975	2030	11	1	FULL	0	0	3	0	3	15.0121	0	0	15.0121	0	15.0121	22.0173	0	0	22.0173	0	22.0173	7.00526	0	0	7.00526	0	7.00526	0.636842	0	0	0.636842	0	0	27.2727	103019	0	0	103019	107115	0	0	107115
172	Bekoji	Ethiopia	Africa	Eastern Africa	7.53229	39.2534	1985	2030	9	8	FULL	0	0	5	0	5	4.96385	0	0	4.96385	0	4.96385	10.9204	0	0	10.9204	0	10.9204	5.95659	0	0	5.95659	0	5.95659	0.661844	0	0	0.661844	0	0	55.5556	51039.1	0	0	51039.1	104111	0	0	104111
173	Bekonang	Indonesia	Asia	South-Eastern Asia	-7.611	110.89	1975	2030	11	6	FULL	0	4	5	4	1	21.8404	0	2.8385	21.8404	2.8385	19.0019	22.8332	0	3.83123	22.8332	3.83123	19.0019	0.992728	0	0.992736	0.992728	0.992736	0	0.090248	0	0.0902488	0.090248	0	36.3636	9.09091	70855.7	0	10498.7	70855.7	61985.6	0	9104.23	61985.6
174	Bellingham	United States of America	North America	Northern America	48.7467	-122.475	2015	2030	3	1	FULL	0	0	2	0	2	30.0035	0	0	30.0035	0	30.0035	35.003	0	0	35.003	0	35.003	4.99952	0	0	4.99952	0	4.99952	1.66651	0	0	1.66651	0	0	66.6667	55980.3	0	0	55980.3	67477.6	0	0	67477.6
175	Bendo	Indonesia	Asia	South-Eastern Asia	-8.07849	111.735	1995	2030	7	5	FULL	0	1	2	1	1	20.8567	0	9.13175	20.8567	9.13175	11.725	26.8095	0	6.59396	26.8095	6.59396	20.2155	5.95274	0	-2.53779	5.95274	-2.53779	8.49053	0.850392	0	-0.362542	0.850392	0	14.2857	14.2857	52592.5	0	21295.7	52592.5	69011.2	0	20155	69011.2
176	Beng	Indonesia	Asia	South-Eastern Asia	-8.54154	115.342	1985	2030	9	3	FULL	0	8	8	8	4	16.8921	0	14.0874	16.8921	14.0874	2.80466	69.5552	0	33.1903	69.5552	33.1903	36.3649	52.6631	0	19.1029	52.6631	19.1029	33.5602	5.85145	0	2.12254	5.85145	0	88.8889	44.4444	54285.6	0	42373.9	54285.6	208224	0	94068	208224
177	Bengkulu	Indonesia	Asia	South-Eastern Asia	-3.81817	102.287	1985	2030	9	2	FULL	0	0	7	0	7	40.7881	0	0	40.7881	0	40.7881	83.5633	0	0	83.5633	0	83.5633	42.7752	0	0	42.7752	0	42.7752	4.7528	0	0	4.7528	0	0	77.7778	81321.6	0	0	81321.6	447179	0	0	447179
178	Beni	Dem. Rep. Congo	Africa	Middle Africa	0.495721	29.4673	1975	2030	11	4	FULL	0	0	11	0	11	28.8369	0	0	28.8369	0	28.8369	73.5843	0	0	73.5843	0	73.5843	44.7474	0	0	44.7474	0	44.7474	4.06795	0	0	4.06795	0	0	100	478080	0	0	478080	2045651	0	0	2045651
179	Beppu	Japan	Asia	Eastern Asia	33.3028	131.492	1975	2030	11	3	FULL	1	2	2	2	0	33.9256	15.7938	33.9256	33.9256	18.1318	0	34.9234	16.7917	34.9234	34.9234	18.1318	0	0.997828	0.997828	0.997828	0.997828	0	0	0.0907116	0.0907116	0.0907116	0.0907116	9.09091	18.1818	0	106840	52594	106840	106840	102047	60187.3	102047	102047
180	Berastagi	Indonesia	Asia	South-Eastern Asia	3.19122	98.5109	2000	2030	6	3	FULL	1	1	1	0	0	10.9187	10.9187	10.9187	10.9187	0	0	11.9113	11.9113	11.9113	11.9113	0	0	0.992625	0.992625	0.992625	0.992625	0	0	0.165437	0.165437	0.165437	0.165437	16.6667	0	0	51470.6	51470.6	51470.6	51470.6	58833.4	58833.4	58833.4	58833.4
181	Bike	Ethiopia	Africa	Eastern Africa	9.52795	41.1956	1990	2030	8	3	FULL	0	0	1	0	1	1.98861	0	0	1.98861	0	1.98861	2.98291	0	0	2.98291	0	2.98291	0.994306	0	0	0.994306	0	0.994306	0.124288	0	0	0.124288	0	0	12.5	50788.5	0	0	50788.5	112960	0	0	112960
182	Bima	Indonesia	Asia	South-Eastern Asia	-8.46032	118.738	1975	2030	11	2	FULL	0	0	6	0	6	16.8931	0	0	16.8931	0	16.8931	28.8172	0	0	28.8172	0	28.8172	11.9241	0	0	11.9241	0	11.9241	1.08401	0	0	1.08401	0	0	54.5455	62794.5	0	0	62794.5	132767	0	0	132767
183	Binangonan	Philippines	Asia	South-Eastern Asia	14.4836	121.187	1975	2030	11	3	FULL	0	0	9	0	9	13.9199	0	0	13.9199	0	13.9199	64.6265	0	0	64.6265	0	64.6265	50.7067	0	0	50.7067	0	50.7067	4.6097	0	0	4.6097	0	0	81.8182	66313.7	0	0	66313.7	407072	0	0	407072
184	Binangun	Indonesia	Asia	South-Eastern Asia	-7.62433	109.253	1975	2030	11	4	FULL	0	0	8	0	8	6.95586	0	0	6.95586	0	6.95586	70.5501	0	0	70.5501	0	70.5501	63.5942	0	0	63.5942	0	63.5942	5.78129	0	0	5.78129	0	0	72.7273	53917.8	0	0	53917.8	165098	0	0	165098
185	Bireuen	Indonesia	Asia	South-Eastern Asia	5.20059	96.7015	1975	2030	11	2	FULL	0	0	6	0	6	15.9077	0	0	15.9077	0	15.9077	24.8556	0	0	24.8556	0	24.8556	8.9479	0	0	8.9479	0	8.9479	0.813445	0	0	0.813445	0	0	54.5455	130111	0	0	130111	117666	0	0	117666
186	Bishoftu	Ethiopia	Africa	Eastern Africa	8.75037	38.9641	1980	2030	10	11	FULL	9	9	9	1	0	22.8349	22.8349	22.8349	22.8349	0	0	73.4687	71.7916	73.4687	73.4687	1.67713	0	50.6338	48.9567	50.6338	50.6338	1.67713	0	5.06338	4.89567	5.06338	5.06338	90	10	0	68483.7	68483.7	68483.7	68483.7	517042	514700	517042	517042
188	Bismil	Turkey	Asia	Western Asia	37.8527	40.6641	1985	2030	9	1	FULL	0	0	1	0	1	5.98837	0	0	5.98837	0	5.98837	8.98273	0	0	8.98273	0	8.98273	2.99437	0	0	2.99437	0	2.99437	0.332707	0	0	0.332707	0	0	11.1111	51909.3	0	0	51909.3	80085	0	0	80085
189	Bitung	Indonesia	Asia	South-Eastern Asia	1.44128	125.166	1975	2030	11	6	FULL	10	10	10	1	0	19.879	15.1464	19.879	19.879	4.73261	0	40.7508	34.2709	40.7508	40.7508	6.47989	0	20.8718	19.1245	20.8718	20.8718	1.74728	0	1.89744	1.73859	1.89744	1.89744	90.9091	9.09091	0	56490.7	48486.3	56490.7	56490.7	237832	199437	237832	237832
190	Blitar	Indonesia	Asia	South-Eastern Asia	-8.12511	112.178	1975	2030	11	7	FULL	0	7	7	7	0	79.4567	0	75.2238	79.4567	75.2238	4.23287	146	0	143.416	146	143.416	2.58366	66.5433	0	68.1925	66.5433	68.1925	-1.64921	6.04939	0	6.19932	6.04939	0	63.6364	0	259348	0	250787	259348	410887	0	405718	410887
193	Blora	Indonesia	Asia	South-Eastern Asia	-6.96907	111.416	1975	2030	11	2	FULL	0	0	3	0	3	15.8843	0	0	15.8843	0	15.8843	21.8413	0	0	21.8413	0	21.8413	5.95695	0	0	5.95695	0	5.95695	0.541541	0	0	0.541541	0	0	27.2727	123521	0	0	123521	101161	0	0	101161
194	Boditi	Ethiopia	Africa	Eastern Africa	6.95143	37.857	1975	2030	11	4	FULL	0	5	5	5	0	4.96543	0	4.96543	4.96543	4.96543	0	11.9172	0	11.9172	11.9172	11.9172	0	6.95177	0	6.95177	6.95177	6.95177	0	0.631979	0	0.631979	0.631979	0	45.4545	0	56584	0	56584	56584	115226	0	115226	115226
195	Bodrum	Turkey	Asia	Western Asia	37.0349	27.4143	2015	2030	3	1	FULL	0	0	2	0	2	20.9455	0	0	20.9455	0	20.9455	23.9377	0	0	23.9377	0	23.9377	2.99229	0	0	2.99229	0	2.99229	0.99743	0	0	0.99743	0	0	66.6667	57056.7	0	0	57056.7	72242.8	0	0	72242.8
196	Boise	United States of America	North America	Northern America	43.6188	-116.295	2020	2030	2	1	PARTIAL	0	0	1	0	1	186.805	0	0	10.3621	0	10.3621	192.799	0	0	12.36	0	12.36	5.99427	0	0	1.99784	0	1.99784	2.99714	0	0	0.998918	0	0	50	323335	0	0	20035.8	364871	0	0	25220.7
197	Bojonegoro	Indonesia	Asia	South-Eastern Asia	-7.15103	111.889	1975	2030	11	6	FULL	0	0	5	0	5	25.816	0	0	25.816	0	25.816	78.4436	0	0	78.4436	0	78.4436	52.6276	0	0	52.6276	0	52.6276	4.78433	0	0	4.78433	0	0	45.4545	230231	0	0	230231	273732	0	0	273732
199	Bona Qabelanka	Ethiopia	Africa	Eastern Africa	6.53015	38.7118	1990	2030	8	3	FULL	0	0	3	0	3	3.97092	0	0	3.97092	0	3.97092	9.92714	0	0	9.92714	0	9.92714	5.95623	0	0	5.95623	0	5.95623	0.744528	0	0	0.744528	0	0	37.5	61387	0	0	61387	69930	0	0	69930
200	Bondowoso	Indonesia	Asia	South-Eastern Asia	-7.91942	113.826	1975	2030	11	7	FULL	0	4	5	4	3	17.9122	0	13.9567	17.9122	13.9567	3.95546	32.8392	0	24.6997	32.8392	24.6997	8.13947	14.927	0	10.743	14.927	10.743	4.18401	1.357	0	0.976639	1.357	0	36.3636	27.2727	170388	0	153542	170388	149803	0	125085	149803
201	Bonn	Germany	Europe	Western Europe	50.7802	7.09529	1975	2030	11	1	FULL	0	0	5	0	5	235.23	0	0	235.23	0	235.23	274.27	0	0	274.27	0	274.27	39.0401	0	0	39.0401	0	39.0401	3.5491	0	0	3.5491	0	0	45.4545	598373	0	0	598373	757054	0	0	757054
203	Bonsa Bota	Ethiopia	Africa	Eastern Africa	6.52407	38.8292	1975	2030	11	3	FULL	0	0	8	0	8	3.97077	0	0	3.97077	0	3.97077	24.8181	0	0	24.8181	0	24.8181	20.8473	0	0	20.8473	0	20.8473	1.89521	0	0	1.89521	0	0	72.7273	74494.9	0	0	74494.9	226627	0	0	226627
204	Bore	Ethiopia	Africa	Eastern Africa	6.36193	38.6212	1990	2030	8	3	FULL	0	0	2	0	2	3.97087	0	0	3.97087	0	3.97087	6.94905	0	0	6.94905	0	6.94905	2.97818	0	0	2.97818	0	2.97818	0.372272	0	0	0.372272	0	0	25	60153.6	0	0	60153.6	62995.4	0	0	62995.4
205	Braja Asri	Indonesia	Asia	South-Eastern Asia	-5.16898	105.704	1975	2030	11	1	FULL	0	0	4	0	4	6.94956	0	0	6.94956	0	6.94956	10.9203	0	0	10.9203	0	10.9203	3.97076	0	0	3.97076	0	3.97076	0.360978	0	0	0.360978	0	0	36.3636	61414.2	0	0	61414.2	59899.6	0	0	59899.6
206	Brondong	Indonesia	Asia	South-Eastern Asia	-6.87261	112.329	2015	2030	3	2	FULL	0	0	1	0	1	26.8168	0	0	26.8168	0	26.8168	27.8101	0	0	27.8101	0	27.8101	0.993295	0	0	0.993295	0	0.993295	0.331098	0	0	0.331098	0	0	33.3333	79985.9	0	0	79985.9	73846.9	0	0	73846.9
207	Buea	Cameroon	Africa	Middle Africa	4.15658	9.2641	1990	2030	8	3	FULL	2	5	5	4	0	14.8888	4.29724	14.8888	14.8888	10.5915	0	36.7265	8.91545	36.7265	36.7265	27.811	0	21.8377	4.61821	21.8377	21.8377	17.2195	0	2.72971	0.577277	2.72971	2.72971	25	50	0	50578.5	11828.3	50578.5	50578.5	208571	31221.9	208571	208571
208	Bukittinggi	Indonesia	Asia	South-Eastern Asia	-0.311655	100.386	1975	2030	11	4	FULL	2	7	7	5	0	28.7995	10.6289	28.7995	28.7995	18.1706	0	37.7379	11.6224	37.7379	37.7379	26.1155	0	8.93839	0.993458	8.93839	8.93839	7.94493	0	0.812581	0.0903144	0.812581	0.812581	18.1818	45.4545	0	207980	77672	207980	207980	261880	76559.6	261880	261880
209	Bumihayu	Indonesia	Asia	South-Eastern Asia	-6.65989	107.707	2020	2030	2	10	FULL	0	0	0	0	0	19.901	0	19.901	19.901	19.901	0	19.901	0	19.901	19.901	19.901	0	0	0	0	0	0	0	0	0	0	0	0	0	0	53142.7	0	53142.7	53142.7	55081.6	0	55081.6	55081.6
210	Bunia	Dem. Rep. Congo	Africa	Middle Africa	1.56157	30.2474	1975	2030	11	1	PARTIAL	0	0	10	0	10	27.8552	0	0	27.8552	0	27.8552	64.6639	0	0	63.8958	0	63.8958	36.8088	0	0	36.0407	0	36.0407	3.34625	0	0	3.27642	0	0	90.9091	185639	0	0	185639	549255	0	0	548522
212	Busisi	Dem. Rep. Congo	Africa	Middle Africa	-1.7012	29.0216	1975	2030	11	6	FULL	0	0	3	0	3	5.96248	0	0	5.96248	0	5.96248	10.9314	0	0	10.9314	0	10.9314	4.9689	0	0	4.9689	0	4.9689	0.451718	0	0	0.451718	0	0	27.2727	78127.9	0	0	78127.9	77124.5	0	0	77124.5
213	Butajira	Ethiopia	Africa	Eastern Africa	8.12102	38.3688	2005	2030	5	9	FULL	4	4	4	0	0	11.9145	11.8678	11.9145	11.9145	0	0	17.8722	17.4529	17.8722	17.8722	0	0	5.95769	5.58515	5.95769	5.95769	0	0	1.19154	1.11703	1.19154	1.19154	80	0	0	63396.2	63395.8	63396.2	63396.2	105492	104825	105492	105492
214	Butembo	Dem. Rep. Congo	Africa	Middle Africa	0.125007	29.2972	1975	2030	11	2	FULL	0	0	11	0	11	22.8652	0	0	22.8652	0	22.8652	79.5286	0	0	79.5286	0	79.5286	56.6634	0	0	56.6634	0	56.6634	5.15121	0	0	5.15121	0	0	100	64193.8	0	0	64193.8	463505	0	0	463505
216	Butuan	Philippines	Asia	South-Eastern Asia	8.95938	125.55	1975	2030	11	1	PARTIAL	0	0	5	0	5	19.8953	0	0	10.0285	0	10.0285	45.7578	0	0	28.9243	0	28.9243	25.8625	0	0	18.8958	0	18.8958	2.35114	0	0	1.7178	0	0	45.4545	54348.2	0	0	35032.5	259908	0	0	187057
217	Bwera	Uganda	Africa	Eastern Africa	0.0367797	29.7464	2005	2030	5	5	FULL	0	5	5	5	0	20.8911	0	20.8911	20.8911	20.8911	0	43.7722	0	43.7722	43.7722	43.7722	0	22.8812	0	22.8812	22.8812	22.8812	0	4.57624	0	4.57624	4.57624	0	100	0	58251.2	0	58251.2	58251.2	137429	0	137429	137429
218	Cabanatuan	Philippines	Asia	South-Eastern Asia	15.4884	120.969	1980	2030	10	1	FULL	0	0	9	0	9	14.9191	0	0	14.9191	0	14.9191	59.6738	0	0	59.6738	0	59.6738	44.7547	0	0	44.7547	0	44.7547	4.47547	0	0	4.47547	0	0	90	54191.6	0	0	54191.6	308661	0	0	308661
219	Cadiz	Philippines	Asia	South-Eastern Asia	10.9592	123.314	2000	2030	6	1	FULL	0	0	1	0	1	20.8529	0	0	20.8529	0	20.8529	21.8455	0	0	21.8455	0	21.8455	0.992677	0	0	0.992677	0	0.992677	0.165446	0	0	0.165446	0	0	16.6667	65543.2	0	0	65543.2	84974	0	0	84974
220	Cagayan de Oro	Philippines	Asia	South-Eastern Asia	8.49232	124.64	1975	2030	11	4	FULL	0	0	10	0	10	51.6677	0	0	51.6677	0	51.6677	132.154	0	0	132.154	0	132.154	80.4858	0	0	80.4858	0	80.4858	7.31689	0	0	7.31689	0	0	90.9091	120122	0	0	120122	1.06965e+06	0	0	1.06965e+06
221	Calabanga	Philippines	Asia	South-Eastern Asia	13.7108	123.212	2025	2030	1	3	FULL	0	0	0	0	0	24.8321	0	24.8321	24.8321	24.8321	0	24.8321	0	24.8321	24.8321	24.8321	0	0	0	0	0	0	0	0	0	0	0	0	0	0	63461.4	0	63461.4	63461.4	68682.2	0	68682.2	68682.2
222	Calaca	Philippines	Asia	South-Eastern Asia	13.9217	120.828	2015	2030	3	3	FULL	0	3	3	3	1	34.8119	0	34.8119	34.8119	34.8119	0	78.5799	0	73.4138	78.5799	73.4138	5.16616	43.7681	0	38.6019	43.7681	38.6019	5.16616	14.5894	0	12.8673	14.5894	0	100	33.3333	62037.8	0	62037.8	62037.8	172122	0	152550	172122
223	Calapan	Philippines	Asia	South-Eastern Asia	13.4071	121.182	2010	2030	4	3	FULL	0	0	2	0	2	21.8714	0	0	21.8714	0	21.8714	26.8426	0	0	26.8426	0	26.8426	4.97119	0	0	4.97119	0	4.97119	1.2428	0	0	1.2428	0	0	50	58457.6	0	0	58457.6	95023.9	0	0	95023.9
224	Calbayog	Philippines	Asia	South-Eastern Asia	12.0689	124.592	2010	2030	4	2	FULL	0	0	2	0	2	16.8948	0	0	16.8948	0	16.8948	21.8642	0	0	21.8642	0	21.8642	4.9694	0	0	4.9694	0	4.9694	1.24235	0	0	1.24235	0	0	50	56730.3	0	0	56730.3	84703.5	0	0	84703.5
225	Cali	Colombia	South America	South America	3.43203	-76.5181	1975	2030	11	1	FULL	0	0	9	0	9	134.091	0	0	134.091	0	134.091	185.737	0	0	185.737	0	185.737	51.6462	0	0	51.6462	0	51.6462	4.69511	0	0	4.69511	0	0	81.8182	1152297	0	0	1152297	2742128	0	0	2742128
227	Capulhuac de Mirafuentes	Mexico	North America	Central America	19.1788	-99.4724	2015	2030	3	6	FULL	0	0	0	0	0	18.8862	0	5.41318	18.8862	5.41318	13.473	18.8862	0	5.41318	18.8862	5.41318	13.473	0	0	0	0	0	0	0	0	0	0	0	0	0	68492.7	0	19800.2	68492.7	81079.7	0	23407.5	81079.7
228	CÃ¡rdenas	Mexico	North America	Central America	17.987	-93.3794	1995	2030	7	1	FULL	0	0	6	0	6	14.9075	0	0	14.9075	0	14.9075	31.8025	0	0	31.8025	0	31.8025	16.895	0	0	16.895	0	16.895	2.41357	0	0	2.41357	0	0	85.7143	51964.4	0	0	51964.4	149842	0	0	149842
229	Cartago	Costa Rica	North America	Central America	9.85829	-83.9239	1975	2030	11	5	FULL	0	6	6	6	0	24.8858	0	24.8858	24.8858	24.8858	0	42.804	0	42.804	42.804	42.804	0	17.9182	0	17.9182	17.9182	17.9182	0	1.62893	0	1.62893	1.62893	0	54.5455	0	83838.2	0	83838.2	83838.2	189468	0	189468	189468
230	Cartago	Colombia	South America	South America	4.7455	-75.9129	1975	2030	11	6	FULL	0	0	3	0	3	9.92849	0	0	9.92849	0	9.92849	16.8783	0	0	16.8783	0	16.8783	6.94977	0	0	6.94977	0	6.94977	0.631797	0	0	0.631797	0	0	27.2727	75443.2	0	0	75443.2	120718	0	0	120718
231	Caserta	Italy	Europe	Southern Europe	41.0663	14.3075	1975	2030	11	3	FULL	0	4	4	4	0	60.9025	0	43.443	60.9025	43.443	17.4596	68.8887	0	51.4291	68.8887	51.4291	17.4596	7.98615	0	7.98615	7.98615	7.98615	0	0.726013	0	0.726013	0.726013	0	36.3636	0	188113	0	139151	188113	256925	0	192861	256925
233	Catania	Italy	Europe	Southern Europe	37.5323	15.0743	1975	2030	11	2	FULL	0	3	3	3	1	98.7488	0	95.2229	98.7488	95.2229	3.52591	108.726	0	103.206	108.726	103.206	5.52049	9.97771	0	7.98312	9.97771	7.98312	1.99458	0.907064	0	0.725739	0.907064	0	27.2727	9.09091	432246	0	425081	432246	455420	0	447561	455420
235	Catarman	Philippines	Asia	South-Eastern Asia	12.5053	124.645	2015	2030	3	1	FULL	0	0	1	0	1	7.95146	0	0	7.95146	0	7.95146	13.9163	0	0	13.9163	0	13.9163	5.96489	0	0	5.96489	0	5.96489	1.9883	0	0	1.9883	0	0	33.3333	52204.3	0	0	52204.3	85065.1	0	0	85065.1
236	Catbalogan	Philippines	Asia	South-Eastern Asia	11.7779	124.879	2015	2030	3	1	FULL	0	0	0	0	0	18.8916	0	0	18.8916	0	18.8916	18.8916	0	0	18.8916	0	18.8916	0	0	0	0	0	0	0	0	0	0	0	0	0	53279.3	0	0	53279.3	65565.7	0	0	65565.7
237	Cayambe	Ecuador	South America	South America	0.0369338	-78.1483	2025	2030	1	17	FULL	0	1	1	1	0	14.9249	0	14.9249	14.9249	14.9249	0	20.8945	0	20.8945	20.8945	20.8945	0	5.96962	0	5.96962	5.96962	5.96962	0	5.96962	0	5.96962	5.96962	0	100	0	51685.2	0	51685.2	51685.2	58780.1	0	58780.1	58780.1
238	Cebu City	Philippines	Asia	South-Eastern Asia	10.3119	123.911	1975	2030	11	1	PARTIAL	0	0	11	0	11	136.065	0	0	136.065	0	136.065	423.103	0	0	417.156	0	417.156	287.038	0	0	281.091	0	281.091	26.0944	0	0	25.5537	0	0	100	563498	0	0	563498	3.51833e+06	0	0	3.51667e+06
240	Ceylanpinar	Turkey	Asia	Western Asia	36.8522	40.0495	2015	2030	3	1	FULL	0	0	0	0	0	8.97729	0	0	8.97729	0	8.97729	8.97729	0	0	8.97729	0	8.97729	0	0	0	0	0	0	0	0	0	0	0	0	0	50396.4	0	0	50396.4	63398.4	0	0	63398.4
241	Chacabuco	Chile	South America	South America	-33.1971	-70.6682	2025	2030	1	2	FULL	0	0	1	0	1	8.97364	0	0	8.97364	0	8.97364	10.9681	0	0	10.9681	0	10.9681	1.99447	0	0	1.99447	0	1.99447	1.99447	0	0	1.99447	0	0	100	51718	0	0	51718	61056.1	0	0	61056.1
242	Chalchuapa	El Salvador	North America	Central America	13.9836	-89.6865	1990	2030	8	21	FULL	1	1	1	1	0	10.9487	6.02934	10.9487	10.9487	4.91941	0	12.9394	7.0185	12.9394	12.9394	5.92086	0	1.99061	0.989161	1.99061	1.99061	1.00145	0	0.248827	0.123645	0.248827	0.248827	12.5	12.5	0	58484.2	46320.2	58484.2	58484.2	65077.8	43208.2	65077.8	65077.8
243	Changliu	China	Asia	Eastern Asia	19.9915	110.188	2010	2030	4	1	FULL	1	2	2	1	0	17.8965	5.48618	17.8965	17.8965	12.4103	0	23.861	10.4565	23.861	23.861	13.4045	0	5.96451	4.97033	5.96451	5.96451	0.994183	0	1.49113	1.24258	1.49113	1.49113	25	25	0	53698.2	16391.7	53698.2	53698.2	70099.6	29346.3	70099.6	70099.6
244	Chauk	Myanmar	Asia	South-Eastern Asia	20.8947	94.8212	1990	2030	8	1	FULL	0	0	1	0	1	7.96069	0	0	7.96069	0	7.96069	7.96069	0	0	7.96069	0	7.96069	0	0	0	0	0	0	0	0	0	0	0	0	12.5	53926.3	0	0	53926.3	62711.5	0	0	62711.5
245	Chencha	Ethiopia	Africa	Eastern Africa	6.25087	37.5736	1990	2030	8	1	FULL	0	0	4	0	4	4.96632	0	0	4.96632	0	4.96632	8.93929	0	0	8.93929	0	8.93929	3.97297	0	0	3.97297	0	3.97297	0.496621	0	0	0.496621	0	0	50	55056.8	0	0	55056.8	90557.1	0	0	90557.1
246	Chengmai County	China	Asia	Eastern Asia	19.7316	110.006	1975	2030	11	1	FULL	0	1	2	1	1	8.94865	0	3.59657	8.94865	3.59657	5.35208	10.9368	0	4.59072	10.9368	4.59072	6.34609	1.98817	0	0.994157	1.98817	0.994157	0.994011	0.180743	0	0.0903779	0.180743	0	9.09091	9.09091	70731.2	0	24502.5	70731.2	76047.6	0	32579.2	76047.6
247	Cherkessk	Russia	Europe	Eastern Europe	44.2266	42.0559	1975	2030	11	1	PARTIAL	0	0	4	0	4	19.0077	0	0	1.93667	0	1.93667	36.0142	0	0	8.22137	0	8.22137	17.0065	0	0	6.28469	0	6.28469	1.54604	0	0	0.571336	0	0	36.3636	68820.8	0	0	6485.6	138769	0	0	32712.1
248	Chiantla	Guatemala	North America	Central America	15.3529	-91.4542	2010	2030	4	6	FULL	0	0	2	0	2	11.93	0	0	11.93	0	11.93	15.9062	0	0	15.9062	0	15.9062	3.97626	0	0	3.97626	0	3.97626	0.994066	0	0	0.994066	0	0	50	55708.9	0	0	55708.9	78939.5	0	0	78939.5
249	Chico	United States of America	North America	Northern America	39.7438	-121.84	2000	2030	6	1	FULL	0	0	5	0	5	32.9419	0	0	32.9419	0	32.9419	46.9159	0	0	46.9159	0	46.9159	13.974	0	0	13.974	0	13.974	2.32901	0	0	2.32901	0	0	83.3333	59215.8	0	0	59215.8	93082.3	0	0	93082.3
251	Chifra	Ethiopia	Africa	Eastern Africa	11.6039	40.0188	2005	2030	5	2	FULL	0	0	1	0	1	3.97341	0	0	3.97341	0	3.97341	5.9601	0	0	5.9601	0	5.9601	1.98669	0	0	1.98669	0	1.98669	0.397338	0	0	0.397338	0	0	20	52344.1	0	0	52344.1	91555.5	0	0	91555.5
252	ChillÃ¡n	Chile	South America	South America	-36.6117	-72.1122	1975	2030	11	3	FULL	0	0	6	0	6	20.9766	0	0	20.9766	0	20.9766	37.9607	0	0	37.9607	0	37.9607	16.9841	0	0	16.9841	0	16.9841	1.54401	0	0	1.54401	0	0	54.5455	118278	0	0	118278	163713	0	0	163713
253	Chimaltenango	Guatemala	North America	Central America	14.66	-90.8221	1990	2030	8	14	FULL	0	6	6	6	0	10.9418	0	10.9418	10.9418	10.9418	0	31.8302	0	31.8302	31.8302	31.8302	0	20.8884	0	20.8884	20.8884	20.8884	0	2.61105	0	2.61105	2.61105	0	75	0	56905	0	56905	56905	210922	0	210922	210922
255	Chinandega	Nicaragua	North America	Central America	12.6277	-87.1309	1975	2030	11	9	FULL	0	5	5	5	0	8.93836	0	8.93836	8.93836	8.93836	0	14.8977	0	14.8977	14.8977	14.8977	0	5.95938	0	5.95938	5.95938	5.95938	0	0.541762	0	0.541762	0.541762	0	45.4545	0	81699.1	0	81699.1	81699.1	103476	0	103476	103476
258	Chiquimula	Guatemala	North America	Central America	14.7989	-89.5455	1995	2030	7	10	FULL	0	0	1	0	1	9.95225	0	0	9.95225	0	9.95225	10.9477	0	0	10.9477	0	10.9477	0.995437	0	0	0.995437	0	0.995437	0.142205	0	0	0.142205	0	0	14.2857	50229.6	0	0	50229.6	66333.2	0	0	66333.2
259	Chiro	Ethiopia	Africa	Eastern Africa	9.08005	40.8685	1985	2030	9	3	FULL	0	0	3	0	3	9.93875	0	0	9.93875	0	9.93875	14.9081	0	0	14.9081	0	14.9081	4.96933	0	0	4.96933	0	4.96933	0.552147	0	0	0.552147	0	0	33.3333	55369.4	0	0	55369.4	133549	0	0	133549
260	Chitose	Japan	Asia	Eastern Asia	42.8348	141.643	1985	2030	9	5	FULL	0	2	2	2	0	16.9796	0	16.7509	16.9796	16.7509	0	16.9792	0	16.7505	16.9792	16.7505	0	0	0	0	0	0	0	0	0	0	0	0	22.2222	0	55995.1	0	55979.8	55995.1	51216.6	0	51196.3	51216.6
261	Choluteca	Honduras	North America	Central America	13.3016	-87.1854	1975	2030	11	7	FULL	0	0	7	0	7	13.9051	0	0	13.9051	0	13.9051	34.7622	0	0	34.7622	0	34.7622	20.857	0	0	20.857	0	20.857	1.8961	0	0	1.8961	0	0	63.6364	69640.1	0	0	69640.1	130648	0	0	130648
262	Chucko	Ethiopia	Africa	Eastern Africa	6.58759	38.333	1975	2030	11	4	FULL	0	0	6	0	6	2.97847	0	0	2.97847	0	2.97847	21.8418	0	0	21.8418	0	21.8418	18.8633	0	0	18.8633	0	18.8633	1.71485	0	0	1.71485	0	0	54.5455	61206.9	0	0	61206.9	120970	0	0	120970
263	Chuncheon	South Korea	Asia	Eastern Asia	37.8783	127.735	1975	2030	11	1	FULL	0	0	6	0	6	22.9501	0	0	22.9501	0	22.9501	37.9176	0	0	37.9176	0	37.9176	14.9675	0	0	14.9675	0	14.9675	1.36068	0	0	1.36068	0	0	54.5455	179241	0	0	179241	218541	0	0	218541
264	Cianting Utara	Indonesia	Asia	South-Eastern Asia	-6.63759	107.385	1995	2030	7	11	FULL	0	5	5	5	0	15.9109	0	15.4167	15.9109	15.4167	0	27.8436	0	27.3494	27.8436	27.3494	0	11.9327	0	11.9327	11.9327	11.9327	0	1.70467	0	1.70467	1.70467	0	71.4286	0	51668.1	0	50868.6	51668.1	104527	0	103493	104527
265	Cibodas	Indonesia	Asia	South-Eastern Asia	-7.34872	107.803	1995	2030	7	9	FULL	3	3	3	1	0	16.9169	14.0026	16.9169	16.9169	2.91428	0	40.7984	31.1725	40.7984	40.7984	9.62588	0	23.8814	17.1698	23.8814	23.8814	6.7116	0	3.41163	2.45283	3.41163	3.41163	42.8571	14.2857	0	61967.2	48778.3	61967.2	61967.2	148293	117924	148293	148293
266	Cikijing	Indonesia	Asia	South-Eastern Asia	-7.00996	108.358	1990	2030	8	9	FULL	0	1	1	1	0	11.9378	0	11.9378	11.9378	11.9378	0	20.8918	0	20.8918	20.8918	20.8918	0	8.95395	0	8.95395	8.95395	8.95395	0	1.11924	0	1.11924	1.11924	0	12.5	0	55714.7	0	55714.7	55714.7	109890	0	109890	109890
267	Cilacap	Indonesia	Asia	South-Eastern Asia	-7.69424	109.034	1975	2030	11	3	FULL	0	0	8	0	8	65.597	0	0	65.597	0	65.597	101.372	0	0	101.372	0	101.372	35.7747	0	0	35.7747	0	35.7747	3.25225	0	0	3.25225	0	0	72.7273	732854	0	0	732854	484329	0	0	484329
268	Cilandak Lor	Indonesia	Asia	South-Eastern Asia	-6.31478	107.948	2000	2030	6	5	FULL	0	0	0	0	0	18.9108	0	0	18.9108	0	18.9108	18.9108	0	0	18.9108	0	18.9108	0	0	0	0	0	0	0	0	0	0	0	0	0	53533.5	0	0	53533.5	58667.7	0	0	58667.7
269	Cilegon	Indonesia	Asia	South-Eastern Asia	-6.02357	106.063	1975	2030	11	5	FULL	0	9	10	9	7	32.7684	0	27.8725	32.7684	27.8725	4.89591	204.553	0	118.029	204.553	118.029	86.5235	171.784	0	90.1568	171.784	90.1568	81.6276	15.6168	0	8.19608	15.6168	0	81.8182	63.6364	100825	0	88021.2	100825	755782	0	523240	755782
270	Cintalapa	Mexico	North America	Central America	16.6891	-93.7264	2025	2030	1	1	FULL	0	0	0	0	0	10.9316	0	0	10.9316	0	10.9316	10.9316	0	0	10.9316	0	10.9316	0	0	0	0	0	0	0	0	0	0	0	0	0	53826.2	0	0	53826.2	56681.2	0	0	56681.2
271	Cipanas	Indonesia	Asia	South-Eastern Asia	-6.73253	107.048	1975	2030	11	9	FULL	5	5	5	2	0	47.711	28.5445	47.711	47.711	19.1664	0	64.6061	38.4361	64.6061	64.6061	26.17	0	16.8952	9.89154	16.8952	16.8952	7.00362	0	1.53592	0.899231	1.53592	1.53592	45.4545	18.1818	0	433187	333549	433187	433187	529568	360492	529568	529568
272	Cirebon	Indonesia	Asia	South-Eastern Asia	-6.70701	108.524	1975	2030	11	9	FULL	0	9	9	9	3	129.292	0	114.513	129.292	114.513	14.7786	265.555	0	245.724	265.555	245.724	19.8311	136.263	0	131.21	136.263	131.21	5.05245	12.3875	0	11.9282	12.3875	0	81.8182	27.2727	765487	0	710517	765487	1.68797e+06	0	1597456	1.68797e+06
273	Ciudad Arce	El Salvador	North America	Central America	13.8316	-89.4336	2015	2030	3	19	FULL	0	1	1	1	0	11.9398	0	11.9398	11.9398	11.9398	0	13.9298	0	13.9298	13.9298	13.9298	0	1.99004	0	1.99004	1.99004	1.99004	0	0.663346	0	0.663346	0.663346	0	33.3333	0	50926.6	0	50926.6	50926.6	57873.9	0	57873.9	57873.9
274	Ciudad GuzmÃ¡n	Mexico	North America	Central America	19.7002	-103.467	1975	2030	11	1	FULL	0	1	1	1	0	15.9145	0	15.9145	15.9145	15.9145	0	16.9091	0	16.9091	16.9091	16.9091	0	0.994654	0	0.994654	0.994654	0.994654	0	0.0904231	0	0.0904231	0.0904231	0	9.09091	0	65146.9	0	65146.9	65146.9	93532	0	93532	93532
275	Ciudad Hidalgo	Mexico	North America	Central America	19.6898	-100.55	2000	2030	6	2	FULL	0	0	1	0	1	12.9312	0	0	12.9312	0	12.9312	13.9253	0	0	13.9253	0	13.9253	0.994181	0	0	0.994181	0	0.994181	0.165697	0	0	0.165697	0	0	16.6667	52736.7	0	0	52736.7	77245.2	0	0	77245.2
276	Ciudad Real	Spain	Europe	Southern Europe	38.9838	-3.92947	1985	2030	9	1	FULL	0	2	2	2	0	6.98566	0	6.98566	6.98566	6.98566	0	8.98129	0	8.98129	8.98129	8.98129	0	1.99563	0	1.99563	1.99563	1.99563	0	0.221737	0	0.221737	0.221737	0	22.2222	0	50613.5	0	50613.5	50613.5	53358.3	0	53358.3	53358.3
277	Ciudad SahagÃºn	Mexico	North America	Central America	19.7744	-98.5717	2020	2030	2	4	FULL	0	0	0	0	0	11.9289	0	0	11.9289	0	11.9289	11.9289	0	0	11.9289	0	11.9289	0	0	0	0	0	0	0	0	0	0	0	0	0	50095.2	0	0	50095.2	57226.8	0	0	57226.8
278	Clermont-Ferrand	France	Europe	Western Europe	45.7801	3.09877	1975	2030	11	1	FULL	1	4	4	4	0	50.9681	27.2046	50.9681	50.9681	23.7635	0	65.9589	28.4516	65.9589	65.9589	37.5073	0	14.9908	1.24703	14.9908	14.9908	13.7437	0	1.3628	0.113366	1.3628	1.3628	9.09091	36.3636	0	183500	118395	183500	183500	206990	119457	206990	206990
279	Coatepec	Mexico	North America	Central America	19.4539	-96.9581	2010	2030	4	8	FULL	0	1	1	1	0	9.95119	0	9.95119	9.95119	9.95119	0	11.9414	0	11.9414	11.9414	11.9414	0	1.99018	0	1.99018	1.99018	1.99018	0	0.497545	0	0.497545	0.497545	0	25	0	51810.2	0	51810.2	51810.2	66832.9	0	66832.9	66832.9
280	Coatepeque	Guatemala	North America	Central America	14.7055	-91.8643	1995	2030	7	6	FULL	0	0	5	0	5	9.93784	0	0	9.93784	0	9.93784	22.8564	0	0	22.8564	0	22.8564	12.9186	0	0	12.9186	0	12.9186	1.84551	0	0	1.84551	0	0	71.4286	54000.5	0	0	54000.5	107769	0	0	107769
281	Coatzacoalcos	Mexico	North America	Central America	18.1407	-94.4536	1975	2030	11	1	PARTIAL	0	0	7	0	7	40.7712	0	0	40.7712	0	40.7712	76.5669	0	0	75.875	0	75.875	35.7956	0	0	35.1038	0	35.1038	3.25415	0	0	3.19125	0	0	63.6364	68727.5	0	0	68727.5	321061	0	0	320987
282	CofradÃ­a	Honduras	North America	Central America	15.4053	-88.1597	2020	2030	2	1	FULL	0	0	1	0	1	20.8706	0	0	20.8706	0	20.8706	22.8581	0	0	22.8581	0	22.8581	1.98746	0	0	1.98746	0	1.98746	0.993729	0	0	0.993729	0	0	50	92037	0	0	92037	108994	0	0	108994
283	Cojutepeque	El Salvador	North America	Central America	13.7226	-88.9284	1995	2030	7	20	FULL	0	1	1	1	0	8.94896	0	8.94896	8.94896	8.94896	0	9.94337	0	9.94337	9.94337	9.94337	0	0.994409	0	0.994409	0.994409	0.994409	0	0.142058	0	0.142058	0.142058	0	14.2857	0	51738.7	0	51738.7	51738.7	60409.2	0	60409.2	60409.2
284	Colima	Mexico	North America	Central America	19.245	-103.721	1985	2030	9	1	FULL	0	5	7	5	6	31.8208	0	2.3896	31.8208	2.3896	29.4312	58.669	0	14.1924	58.669	14.1924	44.4767	26.8482	0	11.8028	26.8482	11.8028	15.0455	2.98314	0	1.31142	2.98314	0	55.5556	66.6667	78259.3	0	4152.47	78259.3	324620	0	69597.6	324620
285	Cologne	Germany	Europe	Western Europe	50.9761	6.98942	1975	2030	11	1	PARTIAL	0	0	11	0	11	244.26	0	0	238.499	0	238.499	298.32	0	0	289.439	0	289.439	54.0602	0	0	50.9403	0	50.9403	4.91457	0	0	4.63093	0	0	100	865468	0	0	843499	1.17192e+06	0	0	1.14261e+06
287	Colonia Santa Teresa	Mexico	North America	Central America	19.8461	-99.2427	2015	2030	3	4	FULL	0	0	0	0	0	9.94054	0	0	9.94054	0	9.94054	9.94054	0	0	9.94054	0	9.94054	0	0	0	0	0	0	0	0	0	0	0	0	0	53139	0	0	53139	57247.2	0	0	57247.2
288	Comalcalco	Mexico	North America	Central America	18.2636	-93.2221	2020	2030	2	1	PARTIAL	0	0	0	0	0	14.9067	0	0	8.00022	0	8.00022	14.9067	0	0	8.00022	0	8.00022	0	0	0	0	0	0	0	0	0	0	0	0	0	54436.1	0	0	27780.2	61617.8	0	0	31675.7
289	Comayagua	Honduras	North America	Central America	14.4565	-87.6373	2000	2030	6	1	FULL	0	0	2	0	2	12.9148	0	0	12.9148	0	12.9148	16.8888	0	0	16.8888	0	16.8888	3.97401	0	0	3.97401	0	3.97401	0.662335	0	0	0.662335	0	0	33.3333	54390.3	0	0	54390.3	125611	0	0	125611
290	Compostela	Philippines	Asia	South-Eastern Asia	7.67186	126.093	2025	2030	1	1	FULL	0	0	0	0	0	8.95751	0	0	8.95751	0	8.95751	8.95751	0	0	8.95751	0	8.95751	0	0	0	0	0	0	0	0	0	0	0	0	0	57052.1	0	0	57052.1	62727.4	0	0	62727.4
291	CÃ³rdoba	Mexico	North America	Central America	18.8875	-96.9452	1975	2030	11	7	FULL	0	1	4	1	4	23.879	0	0	23.879	0	23.879	48.76	0	0.793033	48.76	0.793033	47.967	24.881	0	0.793033	24.881	0.793033	24.088	2.26191	0	0.0720939	2.26191	0	9.09091	36.3636	57951.5	0	0	57951.5	236300	0	3858.76	236300
292	Cotabato City	Philippines	Asia	South-Eastern Asia	7.21911	124.243	1975	2030	11	2	FULL	0	0	4	0	4	33.7676	0	0	33.7676	0	33.7676	24.8282	0	0	24.8282	0	24.8282	-8.93941	0	0	-8.93941	0	-8.93941	-0.812674	0	0	-0.812674	0	0	36.3636	233672	0	0	233672	183239	0	0	183239
293	Coyhaique	Chile	South America	South America	-45.578	-72.0546	2020	2030	2	3	FULL	0	0	0	0	0	9.00607	0	0	9.00607	0	9.00607	9.00607	0	0	9.00607	0	9.00607	0	0	0	0	0	0	0	0	0	0	0	0	0	50006.3	0	0	50006.3	52406.3	0	0	52406.3
294	CuarterÃ­a El Uno	Spain	Europe	Southern Europe	27.8503	-15.4217	2005	2030	5	1	FULL	0	2	2	2	0	20.906	0	20.906	20.906	20.906	0	26.879	0	26.879	26.879	26.879	0	5.97292	0	5.97292	5.97292	5.97292	0	1.19458	0	1.19458	1.19458	0	40	0	58085	0	58085	58085	70257.5	0	70257.5	70257.5
295	Cuautla	Mexico	North America	Central America	18.8302	-98.9426	1990	2030	8	4	FULL	0	0	4	0	4	39.7557	0	0	39.7557	0	39.7557	60.6292	0	0	60.6292	0	60.6292	20.8735	0	0	20.8735	0	20.8735	2.60919	0	0	2.60919	0	0	50	115130	0	0	115130	246583	0	0	246583
296	Cuernavaca	Mexico	North America	Central America	18.9268	-99.2111	1975	2030	11	5	FULL	0	7	10	7	7	63.6111	0	63.6111	63.6111	63.6111	0	196.797	0	132.348	196.797	132.348	64.4492	133.186	0	68.7367	133.186	68.7367	64.4492	12.1078	0	6.24879	12.1078	0	63.6364	63.6364	85770.9	0	85770.9	85770.9	909150	0	655167	909150
297	Cumbaya	Ecuador	South America	South America	-0.204841	-78.4144	2005	2030	5	16	FULL	0	4	4	4	0	28.8416	0	28.8416	28.8416	28.8416	0	38.7883	0	38.7883	38.7883	38.7883	0	9.9467	0	9.9467	9.9467	9.9467	0	1.98934	0	1.98934	1.98934	0	80	0	60024.8	0	60024.8	60024.8	106594	0	106594	106594
298	CuricÃ³	Chile	South America	South America	-34.985	-71.2382	1975	2030	11	6	FULL	0	0	5	0	5	11.9738	0	0	11.9738	0	11.9738	21.9535	0	0	21.9535	0	21.9535	9.97966	0	0	9.97966	0	9.97966	0.907242	0	0	0.907242	0	0	45.4545	50850.9	0	0	50850.9	103338	0	0	103338
299	Curup	Indonesia	Asia	South-Eastern Asia	-3.47195	102.529	1975	2030	11	2	FULL	2	4	4	3	0	15.9108	2.60474	15.9108	15.9108	13.3061	0	29.8321	6.74875	29.8321	29.8321	23.0834	0	13.9213	4.14402	13.9213	13.9213	9.77729	0	1.26557	0.376729	1.26557	1.26557	18.1818	27.2727	0	118312	7178.08	118312	118312	154520	20258	154520	154520
300	Cusco	Peru	South America	South America	-13.5321	-71.9497	1975	2030	11	1	FULL	0	0	10	0	10	39.833	0	0	39.833	0	39.833	63.729	0	0	63.729	0	63.729	23.896	0	0	23.896	0	23.896	2.17237	0	0	2.17237	0	0	90.9091	149633	0	0	149633	547027	0	0	547027
301	Cutral CÃ³	Argentina	South America	South America	-38.9368	-69.2183	2015	2030	3	1	PARTIAL	0	0	1	0	1	13.967	0	0	6.83803	0	6.83803	14.9649	0	0	7.83595	0	7.83595	0.997925	0	0	0.997923	0	0.997923	0.332642	0	0	0.332641	0	0	33.3333	50925.9	0	0	26973.6	61896.3	0	0	33481.3
302	Daegot	South Korea	Asia	Eastern Asia	37.6697	126.584	2015	2030	3	1	PARTIAL	0	0	1	0	1	24.9653	0	0	20.0414	0	20.0414	26.9628	0	0	21.0586	0	21.0586	1.99749	0	0	1.01724	0	1.01724	0.665829	0	0	0.339081	0	0	33.3333	59264.3	0	0	45397.5	74052.9	0	0	56308
303	Daet	Philippines	Asia	South-Eastern Asia	14.1203	122.964	2000	2030	6	2	FULL	0	0	5	0	5	15.8929	0	0	15.8929	0	15.8929	40.7255	0	0	40.7255	0	40.7255	24.8326	0	0	24.8326	0	24.8326	4.13876	0	0	4.13876	0	0	83.3333	58795	0	0	58795	159516	0	0	159516
304	Dagupan [Lingayen]	Philippines	Asia	South-Eastern Asia	16.0308	120.284	1985	2030	9	1	PARTIAL	0	0	9	0	9	45.7985	0	0	20.9074	0	20.9074	386.249	0	0	194.362	0	194.362	340.451	0	0	173.454	0	173.454	37.8278	0	0	19.2727	0	0	100	90913.7	0	0	32510.6	1.07523e+06	0	0	460523
305	Danzhou City	China	Asia	Eastern Asia	19.5155	109.571	1985	2030	9	1	FULL	0	0	9	0	9	8.95038	0	0	8.95038	0	8.95038	36.7983	0	0	36.7983	0	36.7983	27.8479	0	0	27.8479	0	27.8479	3.09421	0	0	3.09421	0	0	100	55064.2	0	0	55064.2	512941	0	0	512941
309	Davao City	Philippines	Asia	South-Eastern Asia	7.08914	125.618	1975	2030	11	3	FULL	0	0	11	0	11	55.7086	0	0	55.7086	0	55.7086	230.774	0	0	230.774	0	230.774	175.065	0	0	175.065	0	175.065	15.915	0	0	15.915	0	0	100	208812	0	0	208812	1848379	0	0	1848379
310	David	Panama	North America	Central America	8.42079	-82.4316	1995	2030	7	1	FULL	0	0	3	0	3	19.8681	0	0	19.8681	0	19.8681	35.7617	0	0	35.7617	0	35.7617	15.8935	0	0	15.8935	0	15.8935	2.27051	0	0	2.27051	0	0	42.8571	55189.1	0	0	55189.1	141963	0	0	141963
311	Davis	United States of America	North America	Northern America	38.5517	-121.744	2005	2030	5	1	PARTIAL	0	0	1	0	1	23.9506	0	0	9.77055	0	9.77055	27.9437	0	0	10.3323	0	10.3323	3.99307	0	0	0.561793	0	0.561793	0.798615	0	0	0.112359	0	0	20	58022.6	0	0	26697.7	79220	0	0	34689.5
312	Dawran AlJadeedah	Yemen	Asia	Western Asia	14.7653	44.1873	2005	2030	5	2	FULL	0	0	1	0	1	4.96776	0	0	4.96776	0	4.96776	5.96148	0	0	5.96148	0	5.96148	0.993722	0	0	0.993722	0	0.993722	0.198744	0	0	0.198744	0	0	20	54427.6	0	0	54427.6	73582.8	0	0	73582.8
314	Debre Birhan	Ethiopia	Africa	Eastern Africa	9.67567	39.5301	1980	2030	10	6	FULL	0	0	5	0	5	8.93671	0	0	8.93671	0	8.93671	17.8735	0	0	17.8735	0	17.8735	8.93681	0	0	8.93681	0	8.93681	0.893681	0	0	0.893681	0	0	50	50066.3	0	0	50066.3	145265	0	0	145265
320	Debubawi	Ethiopia	Africa	Eastern Africa	13.2468	39.5148	1995	2030	7	1	FULL	0	0	2	0	2	4.96633	0	0	4.96633	0	4.96633	6.95287	0	0	6.95287	0	6.95287	1.98653	0	0	1.98653	0	1.98653	0.28379	0	0	0.28379	0	0	28.5714	59664.6	0	0	59664.6	51091.9	0	0	51091.9
321	Dekemhare	Eritrea	Africa	Eastern Africa	15.0693	39.0419	1990	2030	8	1	FULL	0	0	2	0	2	7.94707	0	0	7.94707	0	7.94707	10.9274	0	0	10.9274	0	10.9274	2.98032	0	0	2.98032	0	2.98032	0.372541	0	0	0.372541	0	0	25	59676	0	0	59676	66780.1	0	0	66780.1
322	Demak	Indonesia	Asia	South-Eastern Asia	-6.89303	110.644	1975	2030	11	6	FULL	0	0	4	0	4	8.93467	0	0	8.93467	0	8.93467	11.9128	0	0	11.9128	0	11.9128	2.97811	0	0	2.97811	0	2.97811	0.270737	0	0	0.270737	0	0	36.3636	82774	0	0	82774	69733.3	0	0	69733.3
323	Denizli	Turkey	Asia	Western Asia	37.7784	29.0923	1975	2030	11	1	PARTIAL	0	0	8	0	8	29.951	0	0	3.79047	0	3.79047	80.8653	0	0	40.958	0	40.958	50.9143	0	0	37.1676	0	37.1676	4.62858	0	0	3.37887	0	0	72.7273	153940	0	0	11917.1	463151	0	0	129891
324	Denpasar	Indonesia	Asia	South-Eastern Asia	-8.65752	115.205	1975	2030	11	3	FULL	0	6	11	6	11	170.933	0	13.4636	170.933	13.4636	157.469	409.441	0	22.8602	409.441	22.8602	386.581	238.508	0	9.39666	238.508	9.39666	229.112	21.6826	0	0.854242	21.6826	0	54.5455	100	296755	0	71489.6	296755	2.13505e+06	0	138541	2.13505e+06
325	Dera	Ethiopia	Africa	Eastern Africa	8.3278	39.3203	2000	2030	6	11	FULL	0	3	3	3	0	4.96416	0	4.96416	4.96416	4.96416	0	9.92825	0	9.92825	9.92825	9.92825	0	4.96409	0	4.96409	4.96409	4.96409	0	0.827349	0	0.827349	0.827349	0	50	0	50119.2	0	50119.2	50119.2	87577.9	0	87577.9	87577.9
326	Dessie	Ethiopia	Africa	Eastern Africa	11.139	39.6375	1975	2030	11	1	PARTIAL	0	0	4	0	4	21.8476	0	0	13.1341	0	13.1341	27.8064	0	0	15.6989	0	15.6989	5.95875	0	0	2.56479	0	2.56479	0.541704	0	0	0.233163	0	0	36.3636	102656	0	0	40378.8	321213	0	0	166181
327	Dhamar	Yemen	Asia	Western Asia	14.5482	44.4008	1975	2030	11	1	FULL	0	7	8	7	5	17.882	0	12.3166	17.882	12.3166	5.56535	43.7116	0	31.9612	43.7116	31.9612	11.7504	25.8297	0	19.6446	25.8297	19.6446	6.18507	2.34815	0	1.78587	2.34815	0	63.6364	45.4545	71332.5	0	53319.1	71332.5	386190	0	298620	386190
328	Diana	Madagascar	Africa	Eastern Africa	-13.6725	48.45	2025	2030	1	2	FULL	0	0	1	0	1	7.96101	0	0	7.96101	0	7.96101	8.95619	0	0	8.95619	0	8.95619	0.99519	0	0	0.99519	0	0.99519	0.99519	0	0	0.99519	0	0	100	55235.4	0	0	55235.4	63847.2	0	0	63847.2
329	Diana	Madagascar	Africa	Eastern Africa	-12.2405	49.3499	2025	2030	1	1	FULL	0	0	0	0	0	8.94483	0	0	8.94483	0	8.94483	8.94483	0	0	8.94483	0	8.94483	0	0	0	0	0	0	0	0	0	0	0	0	0	60056.7	0	0	60056.7	72524.3	0	0	72524.3
330	Didim	Turkey	Asia	Western Asia	37.3668	27.2714	2020	2030	2	1	FULL	0	0	0	0	0	11.9693	0	0	11.9693	0	11.9693	11.9693	0	0	11.9693	0	11.9693	0	0	0	0	0	0	0	0	0	0	0	0	0	51277.3	0	0	51277.3	53930.5	0	0	53930.5
331	Digos	Philippines	Asia	South-Eastern Asia	6.75517	125.347	1990	2030	8	3	FULL	0	0	7	0	7	15.9098	0	0	15.9098	0	15.9098	50.7171	0	0	50.7171	0	50.7171	34.8073	0	0	34.8073	0	34.8073	4.35091	0	0	4.35091	0	0	87.5	54276.3	0	0	54276.3	172092	0	0	172092
333	Dilla	Ethiopia	Africa	Eastern Africa	6.4126	38.3093	1975	2030	11	3	FULL	0	0	6	0	6	7.94265	0	0	7.94265	0	7.94265	40.705	0	0	40.705	0	40.705	32.7623	0	0	32.7623	0	32.7623	2.97839	0	0	2.97839	0	0	54.5455	51023.7	0	0	51023.7	229956	0	0	229956
334	Diyarbakir	Turkey	Asia	Western Asia	37.9206	40.2163	1975	2030	11	1	FULL	0	0	8	0	8	16.963	0	0	16.963	0	16.963	71.8423	0	0	71.8423	0	71.8423	54.8793	0	0	54.8793	0	54.8793	4.98903	0	0	4.98903	0	0	72.7273	125051	0	0	125051	634427	0	0	634427
335	Djibouti	Djibouti	Africa	Eastern Africa	11.5883	43.1459	1975	2030	11	1	FULL	0	0	9	0	9	23.857	0	0	23.857	0	23.857	69.5854	0	0	69.5854	0	69.5854	45.7284	0	0	45.7284	0	45.7284	4.15712	0	0	4.15712	0	0	81.8182	75816.4	0	0	75816.4	791749	0	0	791749
336	Dodolla	Ethiopia	Africa	Eastern Africa	6.97576	39.1833	1975	2030	11	3	FULL	0	0	4	0	4	4.96367	0	0	4.96367	0	4.96367	10.9201	0	0	10.9201	0	10.9201	5.9564	0	0	5.9564	0	5.9564	0.541491	0	0	0.541491	0	0	36.3636	56503.9	0	0	56503.9	166316	0	0	166316
337	Dogubayazit	Turkey	Asia	Western Asia	39.5525	44.0725	1985	2030	9	2	FULL	0	4	4	4	0	10.9788	0	10.9788	10.9788	10.9788	0	16.9671	0	16.9671	16.9671	16.9671	0	5.98825	0	5.98825	5.98825	5.98825	0	0.665361	0	0.665361	0.665361	0	44.4444	0	50097.4	0	50097.4	50097.4	118557	0	118557	118557
338	Dolopo	Indonesia	Asia	South-Eastern Asia	-7.77632	111.515	1985	2030	9	4	FULL	0	3	3	3	1	30.778	0	30.0887	30.778	30.0887	0.689328	54.6058	0	53.1272	54.6058	53.1272	1.47862	23.8278	0	23.0385	23.8278	23.0385	0.789288	2.64753	0	2.55983	2.64753	0	33.3333	11.1111	83100.1	0	81508.4	83100.1	140702	0	138474	140702
339	Dompu	Indonesia	Asia	South-Eastern Asia	-8.54329	118.439	1975	2030	11	2	FULL	0	0	3	0	3	8.94096	0	0	8.94096	0	8.94096	16.8896	0	0	16.8896	0	16.8896	7.94861	0	0	7.94861	0	7.94861	0.722601	0	0	0.722601	0	0	27.2727	57417.2	0	0	57417.2	102504	0	0	102504
341	Dongducheon	South Korea	Asia	Eastern Asia	37.9064	127.056	2000	2030	6	1	FULL	0	0	5	0	5	13.9758	0	0	13.9758	0	13.9758	53.9074	0	0	53.9074	0	53.9074	39.9316	0	0	39.9316	0	39.9316	6.65527	0	0	6.65527	0	0	83.3333	53794.3	0	0	53794.3	187021	0	0	187021
342	Dongfeng	China	Asia	Eastern Asia	42.6772	125.53	1975	2030	11	1	FULL	0	0	2	0	2	8.99718	0	0	8.99718	0	8.99718	10.9967	0	0	10.9967	0	10.9967	1.99951	0	0	1.99951	0	1.99951	0.181774	0	0	0.181774	0	0	18.1818	85491.2	0	0	85491.2	52235.7	0	0	52235.7
343	Dongjingcheng	China	Asia	Eastern Asia	44.1193	129.227	1990	2030	8	1	FULL	0	1	1	1	1	13.9861	0	2.98875	13.9861	2.98875	10.9973	17.9827	0	6.90703	17.9827	6.90703	11.0757	3.99665	0	3.91829	3.99665	3.91829	0	0.499581	0	0.489786	0.499581	0	12.5	12.5	53371.3	0	6412.7	53371.3	60361.4	0	19202	60361.4
344	Dormagen	Germany	Europe	Western Europe	51.081	6.8321	1995	2030	7	1	PARTIAL	0	0	0	0	0	17.0185	0	0	4.62762	0	4.62762	19.0215	0	0	4.62762	0	4.62762	2.003	0	0	0	0	0	0.286143	0	0	0	0	0	0	51204.6	0	0	13902.2	56941	0	0	15951
345	Douala	Cameroon	Africa	Middle Africa	4.0525	9.73202	1975	2030	11	2	FULL	0	0	11	0	11	128.064	0	0	128.064	0	128.064	286.903	0	0	286.903	0	286.903	158.839	0	0	158.839	0	158.839	14.4399	0	0	14.4399	0	0	100	401131	0	0	401131	5.31238e+06	0	0	5.31238e+06
346	Doyogena	Ethiopia	Africa	Eastern Africa	7.35337	37.7858	2000	2030	6	5	FULL	0	0	2	0	2	3.9726	0	0	3.9726	0	3.9726	6.95205	0	0	6.95205	0	6.95205	2.97946	0	0	2.97946	0	2.97946	0.496576	0	0	0.496576	0	0	33.3333	51096.7	0	0	51096.7	65000.4	0	0	65000.4
347	Dschang	Cameroon	Africa	Middle Africa	5.45094	10.058	1975	2030	11	2	FULL	0	0	7	0	7	10.9227	0	0	10.9227	0	10.9227	16.8804	0	0	16.8804	0	16.8804	5.95775	0	0	5.95775	0	5.95775	0.541614	0	0	0.541614	0	0	63.6364	61410.9	0	0	61410.9	65146.9	0	0	65146.9
348	Dunhua	China	Asia	Eastern Asia	43.361	128.233	1975	2030	11	1	FULL	0	0	7	0	7	25.9701	0	0	25.9701	0	25.9701	33.9616	0	0	33.9616	0	33.9616	7.99146	0	0	7.99146	0	7.99146	0.726496	0	0	0.726496	0	0	63.6364	205782	0	0	205782	194945	0	0	194945
349	Durame	Ethiopia	Africa	Eastern Africa	7.24762	37.9024	1985	2030	9	5	FULL	0	4	4	4	2	6.95145	0	5.54723	6.95145	5.54723	1.40422	14.8968	0	10.8695	14.8968	10.8695	4.02738	7.94538	0	5.32222	7.94538	5.32222	2.62316	0.88282	0	0.591358	0.88282	0	44.4444	22.2222	52141.2	0	47855.8	52141.2	187031	0	150804	187031
350	Durango	Mexico	North America	Central America	24.0242	-104.661	1975	2030	11	1	FULL	0	7	7	7	1	54.7107	0	53.8682	54.7107	53.8682	0.842537	90.5215	0	88.4032	90.5215	88.4032	2.11832	35.8108	0	34.535	35.8108	34.535	1.27579	3.25553	0	3.13955	3.25553	0	63.6364	9.09091	181197	0	180022	181197	556075	0	549718	556075
352	Echizen	Japan	Asia	Eastern Asia	35.9172	136.172	1975	2030	11	1	FULL	0	0	3	0	3	26.9289	0	0	26.9289	0	26.9289	24.9341	0	0	24.9341	0	24.9341	-1.9948	0	0	-1.9948	0	-1.9948	-0.181345	0	0	-0.181345	0	0	27.2727	82022.5	0	0	82022.5	57191.8	0	0	57191.8
353	El Carmen	Ecuador	South America	South America	-0.270938	-79.461	2010	2030	4	4	FULL	0	0	1	0	1	7.94591	0	0	7.94591	0	7.94591	11.9188	0	0	11.9188	0	11.9188	3.97293	0	0	3.97293	0	3.97293	0.993232	0	0	0.993232	0	0	25	52556.9	0	0	52556.9	73975.2	0	0	73975.2
355	El Progreso	Honduras	North America	Central America	15.3983	-87.802	1975	2030	11	1	FULL	0	0	6	0	6	12.9177	0	0	12.9177	0	12.9177	26.8279	0	0	26.8279	0	26.8279	13.9103	0	0	13.9103	0	13.9103	1.26457	0	0	1.26457	0	0	54.5455	63363.1	0	0	63363.1	148412	0	0	148412
356	Eldoret	Kenya	Africa	Eastern Africa	0.532256	35.256	1990	2030	8	2	FULL	0	0	8	0	8	28.8277	0	0	28.8277	0	28.8277	98.4137	0	0	98.4137	0	98.4137	69.5861	0	0	69.5861	0	69.5861	8.69826	0	0	8.69826	0	0	100	83882.8	0	0	83882.8	512252	0	0	512252
357	Elizovskiy rayon	Russia	Europe	Eastern Europe	53.0521	158.631	1975	2030	11	16	FULL	0	0	0	0	0	48.0511	0	47.1541	48.0511	47.1541	0.897015	42.0446	0	41.9791	42.0446	41.9791	0	-6.00652	0	-5.17504	-6.00652	-5.17504	-0.897015	-0.546047	0	-0.470458	-0.546047	0	0	0	156586	0	156586	156586	133398	0	133398	133398
358	Embu	Kenya	Africa	Eastern Africa	-0.535628	37.4589	2015	2030	3	1	FULL	0	0	3	0	3	10.9256	0	0	10.9256	0	10.9256	95.3485	0	0	95.3485	0	95.3485	84.4229	0	0	84.4229	0	84.4229	28.141	0	0	28.141	0	0	100	72129.2	0	0	72129.2	426089	0	0	426089
359	Ende	Indonesia	Asia	South-Eastern Asia	-8.84217	121.659	1975	2030	11	7	FULL	4	4	4	0	0	15.8931	15.8931	15.8931	15.8931	0	0	24.8334	24.8334	24.8334	24.8334	0	0	8.94025	8.94025	8.94025	8.94025	0	0	0.81275	0.81275	0.81275	0.81275	36.3636	0	0	110134	110134	110134	110134	185272	185272	185272	185272
360	Ercis	Turkey	Asia	Western Asia	39.0304	43.3597	1995	2030	7	1	FULL	0	0	4	0	4	12.9771	0	0	12.9771	0	12.9771	21.962	0	0	21.962	0	21.962	8.98496	0	0	8.98496	0	8.98496	1.28357	0	0	1.28357	0	0	57.1429	61685.8	0	0	61685.8	167676	0	0	167676
361	Erdaojiang	China	Asia	Eastern Asia	41.7793	126.038	1975	2030	11	1	FULL	0	0	3	0	3	9.99864	0	0	9.99864	0	9.99864	17.9979	0	0	17.9979	0	17.9979	7.99928	0	0	7.99928	0	7.99928	0.727207	0	0	0.727207	0	0	27.2727	60441.1	0	0	60441.1	76813	0	0	76813
362	Erdenet	Mongolia	Asia	Eastern Asia	49.0269	104.038	2000	2030	6	1	PARTIAL	0	0	1	0	1	13.0048	0	0	1.5311	0	1.5311	18.0056	0	0	2.63111	0	2.63111	5.00076	0	0	1.10001	0	1.10001	0.83346	0	0	0.183336	0	0	16.6667	52769.6	0	0	3058.49	104376	0	0	7241.53
363	Eregli	Turkey	Asia	Western Asia	37.5107	34.046	1995	2030	7	1	FULL	0	0	2	0	2	9.97692	0	0	9.97692	0	9.97692	12.9697	0	0	12.9697	0	12.9697	2.99275	0	0	2.99275	0	2.99275	0.427536	0	0	0.427536	0	0	28.5714	55010.2	0	0	55010.2	73569.9	0	0	73569.9
364	Erer	Ethiopia	Africa	Eastern Africa	9.55912	41.3825	1995	2030	7	2	FULL	0	0	2	0	2	2.98364	0	0	2.98364	0	2.98364	4.97259	0	0	4.97259	0	4.97259	1.98895	0	0	1.98895	0	1.98895	0.284135	0	0	0.284135	0	0	28.5714	53922.2	0	0	53922.2	82452.1	0	0	82452.1
365	Ergani	Turkey	Asia	Western Asia	38.2645	39.7638	2000	2030	6	1	FULL	0	0	3	0	3	6.98416	0	0	6.98416	0	6.98416	10.975	0	0	10.975	0	10.975	3.99082	0	0	3.99082	0	3.99082	0.665137	0	0	0.665137	0	0	50	54851.5	0	0	54851.5	92930.9	0	0	92930.9
366	Escuintla	Guatemala	North America	Central America	14.3017	-90.7835	1980	2030	10	15	FULL	0	3	3	3	0	13.9257	0	13.9257	13.9257	13.9257	0	19.8958	0	19.8958	19.8958	19.8958	0	5.97016	0	5.97016	5.97016	5.97016	0	0.597016	0	0.597016	0.597016	0	30	0	54450.8	0	54450.8	54450.8	59768.9	0	59768.9	59768.9
369	Esteli	Nicaragua	North America	Central America	13.0905	-86.3569	1975	2030	11	6	FULL	0	0	6	0	6	8.93968	0	0	8.93968	0	8.93968	18.8726	0	0	18.8726	0	18.8726	9.93291	0	0	9.93291	0	9.93291	0.902992	0	0	0.902992	0	0	54.5455	54405.2	0	0	54405.2	114873	0	0	114873
370	Eugene	United States of America	North America	Northern America	44.0519	-123.129	1995	2030	7	5	PARTIAL	0	0	5	0	5	39.9592	0	0	5.18089	0	5.18089	141.851	0	0	69.8693	0	69.8693	101.892	0	0	64.6884	0	64.6884	14.5559	0	0	9.2412	0	0	71.4286	66100	0	0	15138.6	267560	0	0	135534
371	Fairfield	United States of America	North America	Northern America	38.2614	-122.027	1990	2030	8	1	PARTIAL	0	0	1	0	1	31.9299	0	0	5.5152	0	5.5152	37.9162	0	0	7.27602	0	7.27602	5.98627	0	0	1.76082	0	1.76082	0.748284	0	0	0.220103	0	0	12.5	68409.1	0	0	9606.63	103084	0	0	16297.8
372	Faleata West	Samoa	Oceania	Polynesia	-13.8333	-171.783	2025	2030	1	2	FULL	0	0	0	0	0	34.7699	0.999902	34.7699	34.7699	33.77	0	34.7699	0.999902	34.7699	34.7699	33.77	0	0	0	0	0	0	0	0	0	0	0	0	0	0	60041.7	1620.55	60041.7	60041.7	64523.3	1703.92	64523.3	64523.3
373	Famy	Philippines	Asia	South-Eastern Asia	14.4308	121.446	2025	2030	1	3	FULL	0	0	0	0	0	8.94625	0	0	8.94625	0	8.94625	8.94625	0	0	8.94625	0	8.94625	0	0	0	0	0	0	0	0	0	0	0	0	0	59310.6	0	0	59310.6	64898.5	0	0	64898.5
374	Fereydunkenar	Iran	Asia	Southern Asia	36.6874	52.5397	2015	2030	3	1	FULL	0	0	0	0	0	23.9405	0	0	23.9405	0	23.9405	23.9405	0	0	23.9405	0	23.9405	0	0	0	0	0	0	0	0	0	0	0	0	0	57789.8	0	0	57789.8	63336.4	0	0	63336.4
375	Floridablanca	Philippines	Asia	South-Eastern Asia	14.9705	120.554	2015	2030	3	1	FULL	0	1	1	1	1	24.8775	0	19.8281	24.8775	19.8281	5.04945	43.7838	0	36.7898	43.7838	36.7898	6.994	18.9062	0	16.9617	18.9062	16.9617	1.94455	6.30208	0	5.6539	6.30208	0	33.3333	33.3333	71743.9	0	54139.4	71743.9	136012	0	108147	136012
376	Fomboni	Comoros	Africa	Eastern Africa	-12.2822	43.7419	1975	2030	11	2	FULL	0	0	3	0	3	8.9422	0	0	8.9422	0	8.9422	13.91	0	0	13.91	0	13.91	4.96777	0	0	4.96777	0	4.96777	0.451615	0	0	0.451615	0	0	27.2727	77353.5	0	0	77353.5	252958	0	0	252958
377	Fort-de-France	Martinique	Europe	Western Europe	14.6156	-61.068	1975	2030	11	5	FULL	0	3	3	3	0	41.766	0	41.766	41.766	41.766	0	43.7551	0	43.7551	43.7551	43.7551	0	1.98911	0	1.98911	1.98911	1.98911	0	0.180828	0	0.180828	0.180828	0	27.2727	0	128452	0	128452	128452	90627.4	0	90627.4	90627.4
378	Fort Portal	Uganda	Africa	Eastern Africa	0.655108	30.2738	2025	2030	1	4	FULL	1	1	1	0	0	19.8956	19.8956	19.8956	19.8956	0	0	23.8747	23.8747	23.8747	23.8747	0	0	3.97914	3.97914	3.97914	3.97914	0	0	3.97914	3.97914	3.97914	3.97914	100	0	0	55643.1	55643.1	55643.1	55643.1	65422.3	65422.3	65422.3	65422.3
379	Foumban	Cameroon	Africa	Middle Africa	5.72855	10.8944	1975	2030	11	1	FULL	0	0	4	0	4	16.8934	0	0	16.8934	0	16.8934	23.8495	0	0	23.8495	0	23.8495	6.95609	0	0	6.95609	0	6.95609	0.632372	0	0	0.632372	0	0	36.3636	118701	0	0	118701	176044	0	0	176044
380	Foumbot	Cameroon	Africa	Middle Africa	5.50986	10.6335	2015	2030	3	1	FULL	0	0	1	0	1	10.9278	0	0	10.9278	0	10.9278	11.9212	0	0	11.9212	0	11.9212	0.993417	0	0	0.993417	0	0.993417	0.331139	0	0	0.331139	0	0	33.3333	51061.3	0	0	51061.3	52627.1	0	0	52627.1
381	Fuji	Japan	Asia	Eastern Asia	35.1836	138.657	1975	2030	11	7	FULL	0	5	5	5	0	83.8372	0	83.8372	83.8372	83.8372	0	100.804	0	100.804	100.804	100.804	0	16.9669	0	16.9669	16.9669	16.9669	0	1.54244	0	1.54244	1.54244	0	45.4545	0	226788	0	226788	226788	136474	0	136474	136474
385	Fukaya	Japan	Asia	Eastern Asia	36.1784	139.305	1975	2030	11	12	FULL	0	0	5	0	5	27.9367	0	0	27.9367	0	27.9367	44.8996	0	0	44.8996	0	44.8996	16.9629	0	0	16.9629	0	16.9629	1.54208	0	0	1.54208	0	0	45.4545	79801.2	0	0	79801.2	99947.7	0	0	99947.7
387	Fukui	Japan	Asia	Eastern Asia	36.0802	136.223	1975	2030	11	1	FULL	0	0	6	0	6	43.8874	0	0	43.8874	0	43.8874	63.8355	0	0	63.8355	0	63.8355	19.9481	0	0	19.9481	0	19.9481	1.81346	0	0	1.81346	0	0	54.5455	114237	0	0	114237	188408	0	0	188408
388	Fukuoka	Japan	Asia	Eastern Asia	33.6079	130.438	1975	2030	11	4	PARTIAL	0	0	8	0	8	385.85	0	0	360.439	0	360.439	449.659	0	0	415.029	0	415.029	63.8095	0	0	54.5896	0	54.5896	5.80087	0	0	4.9627	0	0	72.7273	1.83407e+06	0	0	1.79303e+06	2172410	0	0	2.11515e+06
389	Fukushima	Japan	Asia	Eastern Asia	37.7741	140.467	1975	2030	11	7	FULL	0	4	4	4	0	48.8816	0	48.8816	48.8816	48.8816	0	65.8394	0	65.8394	65.8394	65.8394	0	16.9578	0	16.9578	16.9578	16.9578	0	1.54162	0	1.54162	1.54162	0	36.3636	0	102642	0	102642	102642	158645	0	158645	158645
390	Fukuyama	Japan	Asia	Eastern Asia	34.4787	133.402	1975	2030	11	1	PARTIAL	0	0	5	0	5	77.7912	0	0	16.4292	0	16.4292	135.638	0	0	62.1405	0	62.1405	57.8466	0	0	45.7113	0	45.7113	5.25878	0	0	4.15557	0	0	45.4545	135019	0	0	23198.9	344621	0	0	125933
391	Funchal	Portugal	Europe	Southern Europe	32.6549	-16.9372	1990	2030	8	1	FULL	2	4	4	3	0	39.8884	26.4134	39.8884	39.8884	13.4749	0	46.8679	28.3937	46.8679	46.8679	18.4742	0	6.97953	1.98028	6.97953	6.97953	4.99926	0	0.872441	0.247535	0.872441	0.872441	25	37.5	0	102007	72436.1	102007	102007	137191	95035.9	137191	137191
392	Fuwwah	Yemen	Asia	Western Asia	14.4937	49.0523	2005	2030	5	1	FULL	0	0	1	0	1	12.9274	0	0	12.9274	0	12.9274	20.883	0	0	20.883	0	20.883	7.95553	0	0	7.95553	0	7.95553	1.59111	0	0	1.59111	0	0	20	57437	0	0	57437	111543	0	0	111543
397	Ganja	Azerbaijan	Asia	Western Asia	40.6855	46.3548	1975	2030	11	1	FULL	0	0	7	0	7	42.9359	0	0	42.9359	0	42.9359	65.9014	0	0	65.9014	0	65.9014	22.9655	0	0	22.9655	0	22.9655	2.08777	0	0	2.08777	0	0	63.6364	238004	0	0	238004	420315	0	0	420315
398	Gapan	Philippines	Asia	South-Eastern Asia	15.308	120.923	2010	2030	4	1	FULL	0	0	4	0	4	17.9038	0	0	17.9038	0	17.9038	71.6217	0	0	71.6217	0	71.6217	53.7178	0	0	53.7178	0	53.7178	13.4295	0	0	13.4295	0	0	100	66139.8	0	0	66139.8	224403	0	0	224403
400	GarzÃ³n	Colombia	South America	South America	2.19601	-75.6259	2010	2030	4	2	FULL	0	0	2	0	2	5.9559	0	0	5.9559	0	5.9559	9.9265	0	0	9.9265	0	9.9265	3.9706	0	0	3.9706	0	3.9706	0.99265	0	0	0.99265	0	0	50	53773.7	0	0	53773.7	75783.2	0	0	75783.2
401	Gedeb	Ethiopia	Africa	Eastern Africa	5.91612	38.2509	1990	2030	8	1	PARTIAL	0	0	4	0	4	3.97129	0	0	3.97129	0	3.97129	7.94255	0	0	7.70859	0	7.70859	3.97127	0	0	3.7373	0	3.7373	0.496408	0	0	0.467163	0	0	50	54518.5	0	0	54518.5	89960.8	0	0	89649.5
404	Gela	Italy	Europe	Southern Europe	37.0648	14.2496	1975	2030	11	1	PARTIAL	0	0	1	0	1	19.9504	0	0	4.8954	0	4.8954	20.9479	0	0	5.89293	0	5.89293	0.997531	0	0	0.997531	0	0.997531	0.0906846	0	0	0.0906846	0	0	9.09091	70511.1	0	0	13360.8	57239.3	0	0	10886.1
405	Gelemso	Ethiopia	Africa	Eastern Africa	8.81191	40.5192	1975	2030	11	5	FULL	0	0	3	0	3	4.96748	0	0	4.96748	0	4.96748	6.95449	0	0	6.95449	0	6.95449	1.98701	0	0	1.98701	0	1.98701	0.180637	0	0	0.180637	0	0	27.2727	54262.6	0	0	54262.6	86325.2	0	0	86325.2
406	Gembu	Nigeria	Africa	Western Africa	6.71868	11.2528	1995	2030	7	1	PARTIAL	0	0	1	0	1	7.95375	0	0	7.9532	0	7.9532	9.94223	0	0	8.90635	0	8.90635	1.98848	0	0	0.953149	0	0.953149	0.284068	0	0	0.136164	0	0	14.2857	50061.3	0	0	50061.3	86874.9	0	0	85666.8
407	General Santos	Philippines	Asia	South-Eastern Asia	6.10798	125.175	1975	2030	11	2	FULL	0	7	7	7	2	28.8278	0	20.4895	28.8278	20.4895	8.33825	102.392	0	92.1009	102.392	92.1009	10.2909	73.564	0	71.6113	73.564	71.6113	1.95268	6.68764	0	6.51012	6.68764	0	63.6364	18.1818	72142.7	0	55483.7	72142.7	467400	0	417407	467400
408	Genteng	Indonesia	Asia	South-Eastern Asia	-8.36123	114.153	1975	2030	11	5	FULL	0	1	2	1	1	11.9428	0	9.853	11.9428	9.853	2.08978	13.933	0	10.969	13.933	10.969	2.96401	1.9902	0	1.11597	1.9902	1.11597	0.874233	0.180928	0	0.101452	0.180928	0	9.09091	9.09091	74891.7	0	70584.2	74891.7	66236.7	0	61213.1	66236.7
409	Gimbichu	Ethiopia	Africa	Eastern Africa	7.44871	37.6228	1985	2030	9	3	FULL	0	0	4	0	4	3.97321	0	0	3.97321	0	3.97321	8.93976	0	0	8.93976	0	8.93976	4.96655	0	0	4.96655	0	4.96655	0.551838	0	0	0.551838	0	0	44.4444	52678	0	0	52678	85862.4	0	0	85862.4
410	Gimpo	South Korea	Asia	Eastern Asia	37.6176	126.721	1975	2030	11	1	PARTIAL	0	0	3	0	3	9.98476	0	0	9.98476	0	9.98476	47.9276	0	0	30.931	0	30.931	37.9429	0	0	20.9463	0	20.9463	3.44935	0	0	1.90421	0	0	27.2727	54407	0	0	54407	183926	0	0	105906
411	Gingoog	Philippines	Asia	South-Eastern Asia	8.82626	125.105	2015	2030	3	1	FULL	0	0	0	0	0	11.9299	0	0	11.9299	0	11.9299	11.9299	0	0	11.9299	0	11.9299	0	0	0	0	0	0	0	0	0	0	0	0	0	55928.9	0	0	55928.9	78635.3	0	0	78635.3
412	Ginsi	Ethiopia	Africa	Eastern Africa	9.0294	38.1447	1995	2030	7	1	FULL	0	0	3	0	3	5.95838	0	0	5.95838	0	5.95838	8.93752	0	0	8.93752	0	8.93752	2.97915	0	0	2.97915	0	2.97915	0.425592	0	0	0.425592	0	0	42.8571	50191.8	0	0	50191.8	59403.7	0	0	59403.7
413	Girardot	Colombia	South America	South America	4.30205	-74.7999	1975	2030	11	4	FULL	0	0	5	0	5	16.8746	0	0	16.8746	0	16.8746	19.8523	0	0	19.8523	0	19.8523	2.97772	0	0	2.97772	0	2.97772	0.270702	0	0	0.270702	0	0	45.4545	72513.3	0	0	72513.3	110300	0	0	110300
414	Girona	Spain	Europe	Southern Europe	41.9747	2.80865	1975	2030	11	1	FULL	0	1	5	1	5	9.98475	0	0	9.98475	0	9.98475	25.9607	0	4.69324	25.9607	4.69324	21.2675	15.976	0	4.69324	15.976	4.69324	11.2827	1.45236	0	0.426658	1.45236	0	9.09091	45.4545	58359.4	0	0	58359.4	120487	0	7950.06	120487
415	Goa	Philippines	Asia	South-Eastern Asia	13.6718	123.498	2020	2030	2	3	FULL	0	2	2	2	0	23.8402	0	23.8402	23.8402	23.8402	0	27.8109	0	27.8109	27.8109	27.8109	0	3.97074	0	3.97074	3.97074	3.97074	0	1.98537	0	1.98537	1.98537	0	100	0	70455.8	0	70455.8	70455.8	94357	0	94357	94357
416	Gobesa	Ethiopia	Africa	Eastern Africa	7.61911	39.493	1985	2030	9	6	FULL	0	0	3	0	3	3.97127	0	0	3.97127	0	3.97127	6.94967	0	0	6.94967	0	6.94967	2.9784	0	0	2.9784	0	2.9784	0.330933	0	0	0.330933	0	0	33.3333	51988.9	0	0	51988.9	74651	0	0	74651
417	Goma	Dem. Rep. Congo	Africa	Middle Africa	-1.66139	29.2222	1975	2030	11	6	FULL	1	9	9	9	0	33.7971	0	33.7971	33.7971	33.7971	0	86.4783	1.05947	86.4783	86.4783	85.4188	0	52.6812	1.05947	52.6812	52.6812	51.6217	0	4.7892	0.0963155	4.7892	4.7892	9.09091	81.8182	0	171885	0	171885	171885	844648	6904.58	844648	844648
418	Gombong	Indonesia	Asia	South-Eastern Asia	-7.60694	109.508	1975	2030	11	6	FULL	0	0	4	0	4	21.855	0	0	21.855	0	21.855	32.7822	0	0	32.7822	0	32.7822	10.9272	0	0	10.9272	0	10.9272	0.993379	0	0	0.993379	0	0	36.3636	196756	0	0	196756	108902	0	0	108902
419	Gondanglegi	Indonesia	Asia	South-Eastern Asia	-8.17154	112.69	1975	2030	11	8	FULL	0	5	5	5	2	17.8852	0	17.8801	17.8852	17.8801	0	60.6118	0	54.4012	60.6118	54.4012	6.21053	42.7265	0	36.5211	42.7265	36.5211	6.21053	3.88423	0	3.3201	3.88423	0	45.4545	18.1818	62690.8	0	62690.8	62690.8	179538	0	153718	179538
420	Gonghuakeng	Taiwan	Asia	Eastern Asia	25.0631	121.372	1985	2030	9	2	FULL	0	8	8	8	0	14.9327	0	14.9327	14.9327	14.9327	0	40.8186	0	40.8186	40.8186	40.8186	0	25.8859	0	25.8859	25.8859	25.8859	0	2.87621	0	2.87621	2.87621	0	88.8889	0	60329.7	0	60329.7	60329.7	184908	0	184908	184908
423	Grabag	Indonesia	Asia	South-Eastern Asia	-7.81237	109.853	2000	2030	6	6	FULL	0	0	2	0	2	15.8904	0	0	15.8904	0	15.8904	19.8633	0	0	19.8633	0	19.8633	3.97291	0	0	3.97291	0	3.97291	0.662151	0	0	0.662151	0	0	33.3333	55049.8	0	0	55049.8	53111.3	0	0	53111.3
424	Granada	Nicaragua	North America	Central America	11.9321	-85.9547	1975	2030	11	9	FULL	3	3	3	0	0	11.9209	11.9209	11.9209	11.9209	0	0	16.8878	16.8878	16.8878	16.8878	0	0	4.96693	4.96693	4.96693	4.96693	0	0	0.451539	0.451539	0.451539	0.451539	27.2727	0	0	70434.7	70434.7	70434.7	70434.7	97577.1	97577.1	97577.1	97577.1
425	Granollers	Spain	Europe	Southern Europe	41.6061	2.28745	1975	2030	11	1	FULL	0	0	5	0	5	12.9802	0	0	12.9802	0	12.9802	20.9685	0	0	20.9685	0	20.9685	7.98825	0	0	7.98825	0	7.98825	0.726204	0	0	0.726204	0	0	45.4545	58234.2	0	0	58234.2	101987	0	0	101987
426	Gresik	Indonesia	Asia	South-Eastern Asia	-7.16517	112.641	1975	2030	11	5	FULL	0	0	7	0	7	48.6826	0	0	48.6826	0	48.6826	69.5432	0	0	69.5432	0	69.5432	20.8606	0	0	20.8606	0	20.8606	1.89642	0	0	1.89642	0	0	63.6364	268025	0	0	268025	398443	0	0	398443
428	Grufes Sector de Mujere	Guatemala	North America	Central America	14.7365	-90.445	2015	2030	3	15	FULL	0	0	2	0	2	7.96161	0	0	7.96161	0	7.96161	9.95219	0	0	9.95219	0	9.95219	1.99058	0	0	1.99058	0	1.99058	0.663528	0	0	0.663528	0	0	66.6667	57165.9	0	0	57165.9	70597.6	0	0	70597.6
429	Guatemala City	Guatemala	North America	Central America	14.6024	-90.5462	1975	2030	11	19	FULL	1	11	11	11	11	277.628	2.3083	211.43	277.628	209.121	66.1984	479.635	6.40309	352.684	479.635	346.281	126.951	202.007	4.09479	141.254	202.007	137.159	60.7529	18.3643	0.372254	12.8413	18.3643	9.09091	100	100	1.13083e+06	5777.74	822809	1.13083e+06	3.14147e+06	25534.6	2.34974e+06	3.14147e+06
430	Gumaca	Philippines	Asia	South-Eastern Asia	13.9256	122.096	2025	2030	1	2	FULL	0	0	0	0	0	21.8567	0	0	21.8567	0	21.8567	21.8567	0	0	21.8567	0	21.8567	0	0	0	0	0	0	0	0	0	0	0	0	0	54638.4	0	0	54638.4	58424.7	0	0	58424.7
435	Gwangwa	Ethiopia	Africa	Eastern Africa	6.36251	38.2986	2010	2030	4	3	FULL	0	0	2	0	2	6.94972	0	0	6.94972	0	6.94972	60.5617	0	0	60.5617	0	60.5617	53.612	0	0	53.612	0	53.612	13.403	0	0	13.403	0	0	50	78654.1	0	0	78654.1	179015	0	0	179015
436	Gyumri	Armenia	Asia	Western Asia	40.7906	43.852	1975	2030	11	2	FULL	0	0	2	0	2	26.9579	0	0	26.9579	0	26.9579	22.9641	0	0	22.9641	0	22.9641	-3.99383	0	0	-3.99383	0	-3.99383	-0.363075	0	0	-0.363075	0	0	18.1818	187898	0	0	187898	85072.3	0	0	85072.3
437	Hachinohe	Japan	Asia	Eastern Asia	40.5234	141.51	1975	2030	11	8	FULL	0	0	3	0	3	50.904	0	0	50.904	0	50.904	59.8915	0	0	59.8915	0	59.8915	8.98748	0	0	8.98748	0	8.98748	0.817044	0	0	0.817044	0	0	27.2727	102789	0	0	102789	129497	0	0	129497
438	Hacienda RÃ­o Blanco	Colombia	South America	South America	2.48366	-76.57	2020	2030	2	3	FULL	0	0	0	0	0	8.93939	0	8.93939	8.93939	8.93939	0	8.93939	0	8.93939	8.93939	8.93939	0	0	0	0	0	0	0	0	0	0	0	0	0	0	57193.2	0	57193.2	57193.2	59164.6	0	59164.6	59164.6
439	Hadero	Ethiopia	Africa	Eastern Africa	7.1945	37.6698	1990	2030	8	4	FULL	0	0	4	0	4	5.95953	0	0	5.95953	0	5.95953	10.926	0	0	10.926	0	10.926	4.9665	0	0	4.9665	0	4.9665	0.620813	0	0	0.620813	0	0	50	50979.4	0	0	50979.4	94973.8	0	0	94973.8
440	Hadiya	Ethiopia	Africa	Eastern Africa	7.50551	38.0923	1995	2030	7	7	FULL	0	0	4	0	4	1.98597	0	0	1.98597	0	1.98597	7.9438	0	0	7.9438	0	7.9438	5.95783	0	0	5.95783	0	5.95783	0.851119	0	0	0.851119	0	0	57.1429	55759.4	0	0	55759.4	51464.3	0	0	51464.3
445	Hajja	Yemen	Asia	Western Asia	15.694	43.6045	2000	2030	6	1	FULL	0	0	2	0	2	2.9821	0	0	2.9821	0	2.9821	5.9642	0	0	5.9642	0	5.9642	2.98209	0	0	2.98209	0	2.98209	0.497015	0	0	0.497015	0	0	33.3333	50023	0	0	50023	101164	0	0	101164
446	Hakodate	Japan	Asia	Eastern Asia	41.7942	140.732	1975	2030	11	5	FULL	0	4	4	4	0	78.879	0	36.1984	78.879	36.1984	42.6806	82.8711	0	40.1905	82.8711	40.1905	42.6806	3.99206	0	3.99206	3.99206	3.99206	0	0.362914	0	0.362914	0.362914	0	36.3636	0	339970	0	167047	339970	259474	0	128773	259474
448	Hamilton	New Zealand	Oceania	Australia and New Zealand	-37.7789	175.27	1980	2030	10	2	PARTIAL	0	0	2	0	2	57.8891	0	0	4.50655	0	4.50655	79.8459	0	0	11.1226	0	11.1226	21.9568	0	0	6.61608	0	6.61608	2.19568	0	0	0.661608	0	0	20	61591.8	0	0	4293.62	181004	0	0	23594
449	Hammam Damt	Yemen	Asia	Western Asia	14.0841	44.6672	2010	2030	4	1	FULL	0	0	1	0	1	4.96676	0	0	4.96676	0	4.96676	6.95336	0	0	6.95336	0	6.95336	1.9866	0	0	1.9866	0	1.9866	0.496651	0	0	0.496651	0	0	25	51666.2	0	0	51666.2	64929	0	0	64929
451	Harad	Yemen	Asia	Western Asia	16.41	43.0561	2015	2030	3	1	FULL	0	0	2	0	2	6.96193	0	0	6.96193	0	6.96193	10.9407	0	0	10.9407	0	10.9407	3.97882	0	0	3.97882	0	3.97882	1.32627	0	0	1.32627	0	0	66.6667	52939.5	0	0	52939.5	66904.2	0	0	66904.2
452	Haurgeulis	Indonesia	Asia	South-Eastern Asia	-6.43804	107.945	1990	2030	8	9	FULL	0	0	3	0	3	17.9161	0	0	17.9161	0	17.9161	29.8587	0	0	29.8587	0	29.8587	11.9426	0	0	11.9426	0	11.9426	1.49283	0	0	1.49283	0	0	37.5	70691.1	0	0	70691.1	115221	0	0	115221
454	Hawassa	Ethiopia	Africa	Eastern Africa	7.06065	38.4783	1975	2030	11	6	FULL	0	10	10	10	0	17.8706	0	17.8706	17.8706	17.8706	0	58.5745	0	58.5745	58.5745	58.5745	0	40.7039	0	40.7039	40.7039	40.7039	0	3.70035	0	3.70035	3.70035	0	90.9091	0	91902.6	0	91902.6	91902.6	497654	0	497654	497654
455	Haydan	Yemen	Asia	Western Asia	16.7729	43.4314	2020	2030	2	1	FULL	0	0	0	0	0	2.98292	0	0	2.98292	0	2.98292	2.98292	0	0	2.98292	0	2.98292	0	0	0	0	0	0	0	0	0	0	0	0	0	61017.3	0	0	61017.3	83080.9	0	0	83080.9
456	Hayq	Ethiopia	Africa	Eastern Africa	11.3105	39.6801	1985	2030	9	1	FULL	0	0	1	0	1	5.95895	0	0	5.95895	0	5.95895	6.95227	0	0	6.95227	0	6.95227	0.993323	0	0	0.993323	0	0.993323	0.110369	0	0	0.110369	0	0	11.1111	53984	0	0	53984	54455.1	0	0	54455.1
457	Hays	Yemen	Asia	Western Asia	13.9284	43.4753	2020	2030	2	2	FULL	0	0	2	0	2	5.96375	0	0	5.96375	0	5.96375	7.95183	0	0	7.95183	0	7.95183	1.98808	0	0	1.98808	0	1.98808	0.99404	0	0	0.99404	0	0	100	53434.6	0	0	53434.6	65386.9	0	0	65386.9
458	Heerlen	Netherlands	Europe	Western Europe	50.9006	5.99431	1975	2030	11	1	PARTIAL	0	0	3	0	3	72.1191	0	0	29.2325	0	29.2325	65.1073	0	0	19.2157	0	19.2157	-7.01179	0	0	-10.0168	0	-10.0168	-0.637435	0	0	-0.910617	0	0	27.2727	202086	0	0	73061.6	157521	0	0	41078.5
459	Hegarsari	Indonesia	Asia	South-Eastern Asia	-7.09087	107.894	1975	2030	11	9	FULL	8	9	9	7	0	22.8904	19.2212	22.8904	22.8904	3.66917	0	120.432	36.0769	120.432	120.432	84.3548	0	97.5412	16.8556	97.5412	97.5412	80.6856	0	8.86738	1.53233	8.86738	8.86738	72.7273	63.6364	0	112197	104136	112197	112197	381489	193445	381489	381489
460	Hell-Ville	Madagascar	Africa	Eastern Africa	-13.4022	48.2632	2020	2030	2	1	FULL	0	1	1	1	0	10.9495	0	10.9495	10.9495	10.9495	0	12.9402	0	12.9402	12.9402	12.9402	0	1.99076	0	1.99076	1.99076	1.99076	0	0.995378	0	0.995378	0.995378	0	50	0	58588.5	0	58588.5	58588.5	79239.4	0	79239.4	79239.4
461	Helong	China	Asia	Eastern Asia	42.5329	128.983	1990	2030	8	1	PARTIAL	0	0	3	0	3	10.9848	0	0	10.9848	0	10.9848	17.9751	0	0	17.5438	0	17.5438	6.99029	0	0	6.55898	0	6.55898	0.873787	0	0	0.819872	0	0	37.5	51485	0	0	51485	92283.9	0	0	91936.4
462	Heuleut	Indonesia	Asia	South-Eastern Asia	-6.7576	108.326	2000	2030	6	8	FULL	0	4	4	4	0	19.8971	0	19.8971	19.8971	19.8971	0	47.7531	0	47.7531	47.7531	47.7531	0	27.856	0	27.856	27.856	27.856	0	4.64266	0	4.64266	4.64266	0	66.6667	0	56073.4	0	56073.4	56073.4	136510	0	136510	136510
464	Higashimatsuyama	Japan	Asia	Eastern Asia	36.0438	139.396	1985	2030	9	12	FULL	0	0	4	0	4	24.9405	0	0	24.9405	0	24.9405	27.9319	0	0	27.9319	0	27.9319	2.99149	0	0	2.99149	0	2.99149	0.332388	0	0	0.332388	0	0	44.4444	61362.8	0	0	61362.8	69413.1	0	0	69413.1
465	Hirna	Ethiopia	Africa	Eastern Africa	9.21984	41.1007	1985	2030	9	2	FULL	0	0	3	0	3	4.97084	0	0	4.97084	0	4.97084	6.95919	0	0	6.95919	0	6.95919	1.98835	0	0	1.98835	0	1.98835	0.220928	0	0	0.220928	0	0	33.3333	51723.4	0	0	51723.4	58405.4	0	0	58405.4
466	Hirosaki	Japan	Asia	Eastern Asia	40.6024	140.479	1975	2030	11	9	FULL	0	6	6	6	0	23.957	0	23.957	23.957	23.957	0	32.9408	0	32.9408	32.9408	32.9408	0	8.98382	0	8.98382	8.98382	8.98382	0	0.816711	0	0.816711	0.816711	0	54.5455	0	73977.9	0	73977.9	73977.9	101540	0	101540	101540
467	Hiroshima	Japan	Asia	Eastern Asia	34.404	132.451	1975	2030	11	2	FULL	0	0	7	0	7	287.457	0	0	287.457	0	287.457	323.391	0	0	323.391	0	323.391	35.9347	0	0	35.9347	0	35.9347	3.26679	0	0	3.26679	0	0	63.6364	1.23306e+06	0	0	1.23306e+06	1.08378e+06	0	0	1.08378e+06
469	Hitachi	Japan	Asia	Eastern Asia	36.5677	140.645	1975	2030	11	2	FULL	0	0	4	0	4	56.8442	0	0	56.8442	0	56.8442	60.8336	0	0	60.8336	0	60.8336	3.98934	0	0	3.98934	0	3.98934	0.362667	0	0	0.362667	0	0	36.3636	116963	0	0	116963	124481	0	0	124481
470	Hitachinaka	Japan	Asia	Eastern Asia	36.4078	140.531	1995	2030	7	4	FULL	0	0	2	0	2	38.8926	0	0	38.8926	0	38.8926	40.8873	0	0	40.8873	0	40.8873	1.99472	0	0	1.99472	0	1.99472	0.28496	0	0	0.28496	0	0	28.5714	102717	0	0	102717	90787.7	0	0	90787.7
471	Hodeidah	Yemen	Asia	Western Asia	14.7987	42.9472	1975	2030	11	2	FULL	0	0	10	0	10	16.9082	0	0	16.9082	0	16.9082	61.6621	0	0	61.6621	0	61.6621	44.7539	0	0	44.7539	0	44.7539	4.06854	0	0	4.06854	0	0	90.9091	135611	0	0	135611	883581	0	0	883581
472	Hofu	Japan	Asia	Eastern Asia	34.0415	131.567	1975	2030	11	2	FULL	0	0	2	0	2	38.9256	0	0	38.9256	0	38.9256	35.9321	0	0	35.9321	0	35.9321	-2.99354	0	0	-2.99354	0	-2.99354	-0.27214	0	0	-0.27214	0	0	18.1818	110435	0	0	110435	78222	0	0	78222
473	Hoi An	Vietnam	Asia	South-Eastern Asia	15.9184	108.284	1995	2030	7	1	PARTIAL	0	0	3	0	3	23.8935	0	0	1.4461	0	1.4461	39.8212	0	0	11.3527	0	11.3527	15.9278	0	0	9.90655	0	9.90655	2.2754	0	0	1.41522	0	0	42.8571	70935.1	0	0	4239	85806.5	0	0	19020.3
474	Holeta Genet	Ethiopia	Africa	Eastern Africa	9.06646	38.4819	2010	2030	4	1	FULL	0	0	3	0	3	10.9219	0	0	10.9219	0	10.9219	22.8374	0	0	22.8374	0	22.8374	11.9154	0	0	11.9154	0	11.9154	2.97886	0	0	2.97886	0	0	75	55829.5	0	0	55829.5	93899.9	0	0	93899.9
475	Honiara	Solomon Is.	Oceania	Melanesia	-9.43508	159.967	2000	2030	6	2	FULL	0	3	3	3	1	25.8216	0	18.418	25.8216	18.418	7.40363	38.733	0	24.3769	38.733	24.3769	14.3561	12.9114	0	5.9589	12.9114	5.9589	6.9525	2.1519	0	0.993151	2.1519	0	50	16.6667	51061	0	38538.9	51061	164139	0	114196	164139
476	Honjo	Japan	Asia	Eastern Asia	36.2376	139.165	1985	2030	9	11	FULL	0	0	4	0	4	22.9499	0	0	22.9499	0	22.9499	28.9377	0	0	28.9377	0	28.9377	5.98787	0	0	5.98787	0	5.98787	0.665319	0	0	0.665319	0	0	44.4444	63177.6	0	0	63177.6	64967.6	0	0	64967.6
477	Hossana	Ethiopia	Africa	Eastern Africa	7.55516	37.8614	1995	2030	7	6	FULL	0	0	6	0	6	20.8555	0	0	20.8555	0	20.8555	41.7113	0	0	41.7113	0	41.7113	20.8558	0	0	20.8558	0	20.8558	2.9794	0	0	2.9794	0	0	85.7143	89390.4	0	0	89390.4	237472	0	0	237472
478	Hsinchu	Taiwan	Asia	Eastern Asia	24.8191	120.992	1975	2030	11	2	FULL	0	0	10	0	10	62.7389	0	0	62.7389	0	62.7389	147.387	0	0	147.387	0	147.387	84.6479	0	0	84.6479	0	84.6479	7.69526	0	0	7.69526	0	0	90.9091	309483	0	0	309483	708179	0	0	708179
480	Huadian	China	Asia	Eastern Asia	42.9701	126.735	1975	2030	11	1	FULL	0	0	5	0	5	18.9914	0	0	18.9914	0	18.9914	23.9881	0	0	23.9881	0	23.9881	4.99663	0	0	4.99663	0	4.99663	0.454239	0	0	0.454239	0	0	45.4545	100487	0	0	100487	131211	0	0	131211
481	Hualien	Taiwan	Asia	Eastern Asia	23.97	121.589	1980	2030	10	1	PARTIAL	0	0	2	0	2	40.8048	0	0	4.55724	0	4.55724	52.7484	0	0	15.5058	0	15.5058	11.9436	0	0	10.9485	0	10.9485	1.19436	0	0	1.09485	0	0	20	141275	0	0	10307.9	133514	0	0	27134.5
482	Huamantla	Mexico	North America	Central America	19.309	-97.9211	2010	2030	4	9	FULL	0	2	2	2	0	11.9315	0	11.9315	11.9315	11.9315	0	14.9141	0	14.9141	14.9141	14.9141	0	2.98257	0	2.98257	2.98257	2.98257	0	0.745642	0	0.745642	0.745642	0	50	0	51516.4	0	51516.4	51516.4	71398.4	0	71398.4	71398.4
483	Huanglong	China	Asia	Eastern Asia	19.9038	109.529	1975	2030	11	1	FULL	0	0	2	0	2	18.8964	0	0	18.8964	0	18.8964	26.8505	0	0	26.8505	0	26.8505	7.95408	0	0	7.95408	0	7.95408	0.723098	0	0	0.723098	0	0	18.1818	58705.1	0	0	58705.1	90569.1	0	0	90569.1
484	Huauchinango	Mexico	North America	Central America	20.1721	-98.0557	2005	2030	5	1	FULL	0	0	1	0	1	13.9208	0	0	13.9208	0	13.9208	14.9148	0	0	14.9148	0	14.9148	0.994001	0	0	0.994001	0	0.994001	0.1988	0	0	0.1988	0	0	20	53643.4	0	0	53643.4	71257	0	0	71257
485	Huehuetoca	Mexico	North America	Central America	19.8306	-99.2007	2015	2030	3	4	FULL	0	0	0	0	0	15.9047	0	0	15.9047	0	15.9047	15.9047	0	0	15.9047	0	15.9047	0	0	0	0	0	0	0	0	0	0	0	0	0	58561.8	0	0	58561.8	63084.6	0	0	63084.6
486	Huinan	China	Asia	Eastern Asia	42.6812	126.032	1975	2030	11	1	FULL	0	0	4	0	4	9.00154	0	0	9.00154	0	9.00154	13.0015	0	0	13.0015	0	13.0015	3.99997	0	0	3.99997	0	3.99997	0.363634	0	0	0.363634	0	0	36.3636	116680	0	0	116680	94893.7	0	0	94893.7
487	Huruta	Ethiopia	Africa	Eastern Africa	8.15079	39.3537	1995	2030	7	10	FULL	0	1	1	1	0	6.94971	0	2.44812	6.94971	2.44812	4.50159	7.94256	0	3.44097	7.94256	3.44097	4.50159	0.99285	0	0.99285	0.99285	0.99285	0	0.141836	0	0.141836	0.141836	0	14.2857	0	59904.4	0	3127.97	59904.4	56326.6	0	13158.4	56326.6
488	Hwado	South Korea	Asia	Eastern Asia	37.6538	127.282	2005	2030	5	1	FULL	0	0	4	0	4	16.9671	0	0	16.9671	0	16.9671	31.9396	0	0	31.9396	0	31.9396	14.9725	0	0	14.9725	0	14.9725	2.99451	0	0	2.99451	0	0	80	68410.4	0	0	68410.4	173974	0	0	173974
489	Hyesan	North Korea	Asia	Eastern Asia	41.4043	128.192	1975	2030	11	1	FULL	0	0	5	0	5	11.982	0	0	11.982	0	11.982	23.9644	0	0	23.9644	0	23.9644	11.9823	0	0	11.9823	0	11.9823	1.0893	0	0	1.0893	0	0	45.4545	130859	0	0	130859	245339	0	0	245339
492	IbaguÃ©	Colombia	South America	South America	4.44134	-75.2062	1975	2030	11	6	FULL	0	7	7	7	0	31.7634	0	31.7634	31.7634	31.7634	0	58.5642	0	58.5642	58.5642	58.5642	0	26.8008	0	26.8008	26.8008	26.8008	0	2.43643	0	2.43643	2.43643	0	63.6364	0	216768	0	216768	216768	517539	0	517539	517539
493	Ibarra	Ecuador	South America	South America	0.342716	-78.1212	1975	2030	11	16	FULL	3	7	7	5	0	15.9197	2.95338	15.9197	15.9197	12.9664	0	37.8081	12.9391	37.8081	37.8081	24.8691	0	21.8884	9.98567	21.8884	21.8884	11.9027	0	1.98985	0.907788	1.98985	1.98985	27.2727	45.4545	0	58804.2	7603.43	58804.2	58804.2	170227	39280.2	170227	170227
494	Ibb	Yemen	Asia	Western Asia	13.9696	44.1706	1975	2030	11	1	FULL	0	0	9	0	9	9.93507	0	0	9.93507	0	9.93507	58.6179	0	0	58.6179	0	58.6179	48.6829	0	0	48.6829	0	48.6829	4.42572	0	0	4.42572	0	0	81.8182	73204.8	0	0	73204.8	986689	0	0	986689
496	Igdir	Turkey	Asia	Western Asia	39.9249	44.0425	2000	2030	6	4	FULL	0	0	4	0	4	3.99269	0	0	3.99269	0	3.99269	14.973	0	0	14.973	0	14.973	10.9803	0	0	10.9803	0	10.9803	1.83005	0	0	1.83005	0	0	66.6667	53000.2	0	0	53000.2	104984	0	0	104984
497	Iguala	Mexico	North America	Central America	18.348	-99.5414	1985	2030	9	2	FULL	0	0	3	0	3	12.9204	0	0	12.9204	0	12.9204	26.8354	0	0	26.8354	0	26.8354	13.915	0	0	13.915	0	13.915	1.54611	0	0	1.54611	0	0	33.3333	50366.7	0	0	50366.7	115403	0	0	115403
498	Igualada	Spain	Europe	Southern Europe	41.5816	1.62184	2005	2030	5	1	PARTIAL	0	0	2	0	2	9.98673	0	0	6.05905	0	6.05905	12.9832	0	0	8.88209	0	8.88209	2.99651	0	0	2.82304	0	2.82304	0.599303	0	0	0.564608	0	0	40	51604	0	0	32457.6	56313.5	0	0	37539.5
499	Iida	Japan	Asia	Eastern Asia	35.5093	137.83	1975	2030	11	6	FULL	0	0	2	0	2	28.9596	0	0	28.9596	0	28.9596	25.9646	0	0	25.9646	0	25.9646	-2.99499	0	0	-2.99499	0	-2.99499	-0.272272	0	0	-0.272272	0	0	18.1818	90065.1	0	0	90065.1	66422.9	0	0	66422.9
500	Iizuka	Japan	Asia	Eastern Asia	33.6403	130.685	1975	2030	11	4	FULL	0	0	4	0	4	27.9219	0	0	27.9219	0	27.9219	36.8965	0	0	36.8965	0	36.8965	8.97464	0	0	8.97464	0	8.97464	0.815877	0	0	0.815877	0	0	36.3636	69597.4	0	0	69597.4	88199.7	0	0	88199.7
501	Iligan	Philippines	Asia	South-Eastern Asia	8.23151	124.247	1975	2030	11	4	FULL	0	0	8	0	8	16.8849	0	0	16.8849	0	16.8849	95.3413	0	0	95.3413	0	95.3413	78.4564	0	0	78.4564	0	78.4564	7.1324	0	0	7.1324	0	0	72.7273	59598.8	0	0	59598.8	456041	0	0	456041
502	Iloilo City	Philippines	Asia	South-Eastern Asia	10.7079	122.555	1975	2030	11	1	FULL	0	0	9	0	9	56.6018	0	0	56.6018	0	56.6018	169.808	0	0	169.808	0	169.808	113.207	0	0	113.207	0	113.207	10.2915	0	0	10.2915	0	0	81.8182	260221	0	0	260221	784284	0	0	784284
503	Indio	United States of America	North America	Northern America	33.7018	-116.217	2005	2030	5	1	FULL	0	0	5	0	5	22.9239	0	0	22.9239	0	22.9239	108.643	0	0	108.643	0	108.643	85.7195	0	0	85.7195	0	85.7195	17.1439	0	0	17.1439	0	0	100	57667.8	0	0	57667.8	229565	0	0	229565
504	Indramayu	Indonesia	Asia	South-Eastern Asia	-6.35023	108.316	1975	2030	11	6	FULL	0	0	9	0	9	34.819	0	0	34.819	0	34.819	106.445	0	0	106.445	0	106.445	71.6257	0	0	71.6257	0	71.6257	6.51143	0	0	6.51143	0	0	81.8182	137192	0	0	137192	353039	0	0	353039
505	Inter-nishi	Japan	Asia	Eastern Asia	37.4951	139.927	1975	2030	11	11	FULL	0	1	1	1	0	28.9327	0	28.9327	28.9327	28.9327	0	25.94	0	25.94	25.94	25.94	0	-2.99274	0	-2.99274	-2.99274	-2.99274	0	-0.272067	0	-0.272067	-0.272067	0	9.09091	0	125814	0	125814	125814	83026.4	0	83026.4	83026.4
506	Ipiales	Colombia	South America	South America	0.826057	-77.637	1990	2030	8	10	FULL	0	3	3	3	0	10.9409	0	10.9409	10.9409	10.9409	0	13.9249	0	13.9249	13.9249	13.9249	0	2.98392	0	2.98392	2.98392	2.98392	0	0.37299	0	0.37299	0.37299	0	37.5	0	53645.9	0	53645.9	53645.9	116106	0	116106	116106
507	Irapuato	Mexico	North America	Central America	20.6742	-101.354	1975	2030	11	1	PARTIAL	0	0	7	0	7	32.8564	0	0	15.1055	0	15.1055	66.7091	0	0	30.1638	0	30.1638	33.8527	0	0	15.0583	0	15.0583	3.07752	0	0	1.36894	0	0	63.6364	116548	0	0	66713.9	495341	0	0	269409
508	Irba	Ethiopia	Africa	Eastern Africa	6.92277	38.3694	1975	2030	11	4	FULL	0	3	5	3	3	2.97851	0	1.67987	2.97851	1.67987	1.29864	22.8352	0	5.30071	22.8352	5.30071	17.5345	19.8567	0	3.62085	19.8567	3.62085	16.2359	1.80516	0	0.329168	1.80516	0	27.2727	27.2727	60817.8	0	55292.9	60817.8	105110	0	61776	105110
509	Irgalem	Ethiopia	Africa	Eastern Africa	6.74706	38.4113	1975	2030	11	4	FULL	0	0	7	0	7	6.94959	0	0	6.94959	0	6.94959	23.8271	0	0	23.8271	0	23.8271	16.8775	0	0	16.8775	0	16.8775	1.53432	0	0	1.53432	0	0	63.6364	95358.2	0	0	95358.2	242555	0	0	242555
510	Iriga	Philippines	Asia	South-Eastern Asia	13.435	123.386	2015	2030	3	4	FULL	3	3	3	1	0	39.7308	33.324	39.7308	39.7308	6.40675	0	68.5365	49.9081	68.5365	68.5365	18.6284	0	28.8057	16.5841	28.8057	28.8057	12.2217	0	9.60191	5.52802	9.60191	9.60191	100	33.3333	0	122472	98405.3	122472	122472	223649	164853	223649	223649
511	Isahaya	Japan	Asia	Eastern Asia	32.8391	130.033	1975	2030	11	2	FULL	0	1	1	1	0	33.8839	0	30.5964	33.8839	30.5964	3.28751	27.9047	0	26.6098	27.9047	26.6098	1.29487	-5.97924	0	-3.98661	-5.97924	-3.98661	-1.99264	-0.543568	0	-0.362419	-0.543568	0	9.09091	0	119043	0	106952	119043	70219.9	0	66677.2	70219.9
512	Isesaki	Japan	Asia	Eastern Asia	36.3687	139.266	1975	2030	11	12	FULL	0	7	8	7	2	82.8165	0	80.5853	82.8165	80.5853	2.2312	141.687	0	132.474	141.687	132.474	9.21359	58.8707	0	51.8883	58.8707	51.8883	6.98239	5.35188	0	4.71712	5.35188	0	63.6364	18.1818	223105	0	219311	223105	243018	0	227731	243018
513	Ishinomaki	Japan	Asia	Eastern Asia	38.4268	141.284	1975	2030	11	4	FULL	0	0	6	0	6	25.94	0	0	25.94	0	25.94	40.9036	0	0	40.9036	0	40.9036	14.9636	0	0	14.9636	0	14.9636	1.36033	0	0	1.36033	0	0	54.5455	59837.1	0	0	59837.1	104120	0	0	104120
514	Isulan	Philippines	Asia	South-Eastern Asia	6.62993	124.604	2020	2030	2	2	FULL	0	0	0	0	0	8.94131	0	0	8.94131	0	8.94131	8.94131	0	0	8.94131	0	8.94131	0	0	0	0	0	0	0	0	0	0	0	0	0	53582.7	0	0	53582.7	68631.4	0	0	68631.4
515	Itiya	Ethiopia	Africa	Eastern Africa	8.1359	39.2339	1995	2030	7	10	FULL	0	1	1	1	0	5.9568	0	5.9568	5.9568	5.9568	0	6.94955	0	6.94955	6.94955	6.94955	0	0.992753	0	0.992753	0.992753	0.992753	0	0.141822	0	0.141822	0.141822	0	14.2857	0	54797.8	0	54797.8	54797.8	79977.9	0	79977.9	79977.9
516	Iwaki	Japan	Asia	Eastern Asia	37.0501	140.875	1995	2030	7	5	FULL	0	0	1	0	1	18.9503	0	0	18.9503	0	18.9503	19.9484	0	0	19.9484	0	19.9484	0.998077	0	0	0.998077	0	0.998077	0.142582	0	0	0.142582	0	0	14.2857	75994.7	0	0	75994.7	68763.5	0	0	68763.5
517	Iwaki	Japan	Asia	Eastern Asia	36.9398	140.855	1995	2030	7	5	FULL	0	0	1	0	1	70.8097	0	0	70.8097	0	70.8097	74.7994	0	0	74.7994	0	74.7994	3.98973	0	0	3.98973	0	3.98973	0.569961	0	0	0.569961	0	0	14.2857	129354	0	0	129354	131887	0	0	131887
518	Iwakuni	Japan	Asia	Eastern Asia	34.1698	132.219	1975	2030	11	1	FULL	0	0	2	0	2	60.8988	0	0	60.8988	0	60.8988	58.9025	0	0	58.9025	0	58.9025	-1.99625	0	0	-1.99625	0	-1.99625	-0.181478	0	0	-0.181478	0	0	18.1818	151397	0	0	151397	105111	0	0	105111
521	Izumo	Japan	Asia	Eastern Asia	35.3649	132.745	1975	2030	11	1	FULL	0	1	1	1	0	32.9346	0	30.7232	32.9346	30.7232	2.21138	24.9501	0	24.6413	24.9501	24.6413	0	-7.98451	0	-6.08192	-7.98451	-6.08192	-2.21138	-0.725865	0	-0.552902	-0.725865	0	9.09091	0	102675	0	99858	102675	57769.9	0	57500.5	57769.9
522	Ja`ar	Yemen	Asia	Western Asia	13.2216	45.3066	2000	2030	6	1	FULL	0	0	2	0	2	6.95282	0	0	6.95282	0	6.95282	8.93905	0	0	8.93905	0	8.93905	1.98622	0	0	1.98622	0	1.98622	0.331037	0	0	0.331037	0	0	33.3333	53038.5	0	0	53038.5	95506	0	0	95506
523	Jacona de Plancarte	Mexico	North America	Central America	19.9509	-102.311	2010	2030	4	1	FULL	0	0	1	0	1	12.9481	0	0	12.9481	0	12.9481	13.9441	0	0	13.9441	0	13.9441	0.996023	0	0	0.996023	0	0.996023	0.249006	0	0	0.249006	0	0	25	54328.5	0	0	54328.5	59504.5	0	0	59504.5
525	Jajag	Indonesia	Asia	South-Eastern Asia	-8.45511	114.197	2010	2030	4	5	FULL	0	0	1	0	1	41.7965	0	0	41.7965	0	41.7965	37.815	0	0	37.815	0	37.815	-3.98148	0	0	-3.98148	0	-3.98148	-0.99537	0	0	-0.99537	0	0	25	109533	0	0	109533	97112.5	0	0	97112.5
526	Jakarta	Indonesia	Asia	South-Eastern Asia	-6.32814	106.843	1975	2030	11	15	FULL	10	11	11	11	11	2109.64	24.961	402.652	2109.64	377.691	1706.99	4700.2	125.266	1303.61	4700.2	1178.34	3396.59	2590.56	100.305	900.955	2590.56	800.65	1689.6	235.505	9.11865	81.905	235.505	90.9091	100	100	11548081	155153	2485152	11548081	42983216	488851	7572440	42983216
527	Jalapa	Guatemala	North America	Central America	14.6365	-89.9874	1990	2030	8	20	FULL	0	3	3	3	0	8.96318	0	8.96318	8.96318	8.96318	0	14.9387	0	14.9387	14.9387	14.9387	0	5.97549	0	5.97549	5.97549	5.97549	0	0.746936	0	0.746936	0.746936	0	37.5	0	52821.1	0	52821.1	52821.1	90819.4	0	90819.4	90819.4
528	JamundÃ­	Colombia	South America	South America	3.26226	-76.5368	2005	2030	5	1	FULL	0	0	3	0	3	8.93946	0	0	8.93946	0	8.93946	21.8519	0	0	21.8519	0	21.8519	12.9125	0	0	12.9125	0	12.9125	2.58249	0	0	2.58249	0	0	60	54658.9	0	0	54658.9	144262	0	0	144262
529	Jasaan	Philippines	Asia	South-Eastern Asia	8.6211	124.758	2015	2030	3	2	FULL	0	0	2	0	2	22.8557	0	0	22.8557	0	22.8557	27.8206	0	0	27.8206	0	27.8206	4.96493	0	0	4.96493	0	4.96493	1.65498	0	0	1.65498	0	0	66.6667	56244.4	0	0	56244.4	95356.3	0	0	95356.3
530	Jatibarang	Indonesia	Asia	South-Eastern Asia	-6.473	108.313	1975	2030	11	6	FULL	0	0	2	0	2	14.9225	0	0	14.9225	0	14.9225	18.9018	0	0	18.9018	0	18.9018	3.97924	0	0	3.97924	0	3.97924	0.361749	0	0	0.361749	0	0	18.1818	58618	0	0	58618	89623.4	0	0	89623.4
531	Jatilawang	Indonesia	Asia	South-Eastern Asia	-7.52579	109.084	1985	2030	9	4	FULL	0	0	2	0	2	15.9016	0	0	15.9016	0	15.9016	18.883	0	0	18.883	0	18.883	2.98138	0	0	2.98138	0	2.98138	0.331264	0	0	0.331264	0	0	22.2222	66450.7	0	0	66450.7	72331.4	0	0	72331.4
532	Jeju-si	South Korea	Asia	Eastern Asia	33.5078	126.528	1975	2030	11	1	FULL	0	6	6	6	0	28.9386	0	28.9386	28.9386	28.9386	0	47.8971	0	47.8971	47.8971	47.8971	0	18.9584	0	18.9584	18.9584	18.9584	0	1.72349	0	1.72349	1.72349	0	54.5455	0	123626	0	123626	123626	60343.1	0	60343.1	60343.1
533	Jember	Indonesia	Asia	South-Eastern Asia	-8.18424	113.688	1975	2030	11	7	FULL	0	7	7	7	5	66.6612	0	60.1278	66.6612	60.1278	6.53339	92.5284	0	83.011	92.5284	83.011	9.5174	25.8672	0	22.8832	25.8672	22.8832	2.98401	2.35157	0	2.08029	2.35157	0	63.6364	45.4545	559915	0	547398	559915	484116	0	464419	484116
534	Jepara	Indonesia	Asia	South-Eastern Asia	-6.69466	110.714	1975	2030	11	4	PARTIAL	0	0	7	0	7	77.4335	0	0	75.5154	0	75.5154	167.773	0	0	160.884	0	160.884	90.3392	0	0	85.3687	0	85.3687	8.21266	0	0	7.76079	0	0	63.6364	433524	0	0	430807	654182	0	0	635597
535	Jiangyuan	China	Asia	Eastern Asia	42.0741	126.598	1980	2030	10	1	FULL	0	2	5	2	5	12.9932	0	8.08876	12.9932	8.08876	4.90445	26.9863	0	11.1137	26.9863	11.1137	15.8726	13.9931	0	3.02494	13.9931	3.02494	10.9681	1.39931	0	0.302494	1.39931	0	20	50	62312.4	0	43199.3	62312.4	197702	0	81492.1	197702
536	Jinotega	Nicaragua	North America	Central America	13.0909	-85.9988	1995	2030	7	4	FULL	0	0	2	0	2	6.95472	0	0	6.95472	0	6.95472	8.9419	0	0	8.9419	0	8.9419	1.98718	0	0	1.98718	0	1.98718	0.283883	0	0	0.283883	0	0	28.5714	58628.5	0	0	58628.5	81969.7	0	0	81969.7
537	Jizan	Saudi Arabia	Asia	Western Asia	16.9021	42.5582	2005	2030	5	1	FULL	0	0	0	0	0	20.9012	0	0	20.9012	0	20.9012	20.9012	0	0	20.9012	0	20.9012	0	0	0	0	0	0	0	0	0	0	0	0	0	62892	0	0	62892	66295.7	0	0	66295.7
538	JoÃ£o Teves	Cabo Verde	Africa	Western Africa	15.0646	-23.5937	1975	2030	11	1	FULL	0	0	6	0	6	12.9393	0	0	12.9393	0	12.9393	25.8785	0	0	25.8785	0	25.8785	12.9392	0	0	12.9392	0	12.9392	1.1763	0	0	1.1763	0	0	54.5455	71936.5	0	0	71936.5	176976	0	0	176976
539	Joetsu	Japan	Asia	Eastern Asia	37.1843	138.268	1975	2030	11	8	FULL	0	0	1	0	1	36.9547	0	2.15662	36.9547	2.15662	34.798	29.9632	0	2.15662	29.9632	2.15662	27.8065	-6.99148	0	0	-6.99148	0	-6.99148	-0.635589	0	0	-0.635589	0	0	9.09091	93805	0	5272.29	93805	65323.8	0	5501.53	65323.8
541	Jombang	Indonesia	Asia	South-Eastern Asia	-7.53485	112.243	1975	2030	11	7	FULL	0	0	7	0	7	42.7071	0	0	42.7071	0	42.7071	129.117	0	0	129.117	0	129.117	86.4102	0	0	86.4102	0	86.4102	7.85547	0	0	7.85547	0	0	63.6364	253024	0	0	253024	451157	0	0	451157
542	Joresan	Indonesia	Asia	South-Eastern Asia	-7.93442	111.494	1975	2030	11	3	FULL	0	0	1	0	1	22.8354	0	0.673104	22.8354	0.673104	22.1623	23.828	0	0.673104	23.828	0.673104	23.1549	0.992592	0	0	0.992592	0	0.992592	0.0902357	0	0	0.0902357	0	0	9.09091	82606.2	0	1108.81	82606.2	77127.8	0	1297.06	77127.8
543	Jubang	Indonesia	Asia	South-Eastern Asia	-6.95681	108.975	1975	2030	11	3	FULL	0	0	3	0	3	21.8663	0	0	21.8663	0	21.8663	23.854	0	0	23.854	0	23.854	1.98767	0	0	1.98767	0	1.98767	0.180697	0	0	0.180697	0	0	27.2727	63793.5	0	0	63793.5	75705.6	0	0	75705.6
545	Jutiapa	Guatemala	North America	Central America	14.2953	-89.9026	2010	2030	4	21	FULL	0	0	0	0	0	11.9488	11.9488	11.9488	11.9488	0	0	11.9488	11.9488	11.9488	11.9488	0	0	0	0	0	0	0	0	0	0	0	0	0	0	0	53956.5	53956.5	53956.5	53956.5	53090.8	53090.8	53090.8	53090.8
546	Juwana	Indonesia	Asia	South-Eastern Asia	-6.71614	111.157	1975	2030	11	1	PARTIAL	0	0	1	0	1	15.883	0	0	4.35955	0	4.35955	20.8459	0	0	9.32262	0	9.32262	4.96293	0	0	4.96307	0	4.96307	0.451175	0	0	0.451188	0	0	9.09091	107522	0	0	9242.81	86403.3	0	0	19176.5
547	K'Ali K'Esa Bota	Ethiopia	Africa	Eastern Africa	7.84411	38.1813	2005	2030	5	7	FULL	0	1	2	1	1	8.93672	0	5.24633	8.93672	5.24633	3.69038	11.9156	0	7.12116	11.9156	7.12116	4.79446	2.9789	0	1.87483	2.9789	1.87483	1.10408	0.595781	0	0.374966	0.595781	0	20	20	53184.3	0	36061.4	53184.3	61297.6	0	33997.2	61297.6
549	Kabanjahe	Indonesia	Asia	South-Eastern Asia	3.10544	98.495	1975	2030	11	3	FULL	0	2	2	2	0	9.9268	0	9.9268	9.9268	9.9268	0	12.9043	0	12.9043	12.9043	12.9043	0	2.97753	0	2.97753	2.97753	2.97753	0	0.270684	0	0.270684	0.270684	0	18.1818	0	64901.2	0	64901.2	64901.2	89755.6	0	89755.6	89755.6
550	Kabkabiya	Sudan	Africa	Northern Africa	13.7618	23.862	2025	2030	1	1	PARTIAL	0	0	0	0	0	4.97804	0	0	2.17389	0	2.17389	4.97804	0	0	2.17389	0	2.17389	0	0	0	0	0	0	0	0	0	0	0	0	0	55935.5	0	0	40231.5	60778.7	0	0	43554.8
551	Kadipaten	Indonesia	Asia	South-Eastern Asia	-6.73209	108.25	1975	2030	11	9	FULL	0	6	6	6	0	25.8692	0	25.8692	25.8692	25.8692	0	57.7117	0	57.7117	57.7117	57.7117	0	31.8425	0	31.8425	31.8425	31.8425	0	2.89477	0	2.89477	2.89477	0	54.5455	0	106205	0	106205	106205	243371	0	243371	243371
552	Kaesong	North Korea	Asia	Eastern Asia	37.976	126.559	1975	2030	11	1	FULL	0	0	1	0	1	13.9813	0	0	13.9813	0	13.9813	14.9799	0	0	14.9799	0	14.9799	0.998648	0	0	0.998648	0	0.998648	0.0907861	0	0	0.0907861	0	0	9.09091	200096	0	0	200096	282101	0	0	282101
553	Kagoshima	Japan	Asia	Eastern Asia	31.5654	130.534	1975	2030	11	5	FULL	3	7	7	7	0	107.642	16.7629	107.642	107.642	90.8794	0	133.558	24.7653	133.558	133.558	108.793	0	25.9159	8.00245	25.9159	25.9159	17.9135	0	2.35599	0.727496	2.35599	2.35599	27.2727	63.6364	0	365529	41471.5	365529	365529	426076	43044.9	426076	426076
554	Kakamega	Kenya	Africa	Eastern Africa	0.287113	34.752	2000	2030	6	1	FULL	0	0	5	0	5	16.8888	0	0	16.8888	0	16.8888	36.7576	0	0	36.7576	0	36.7576	19.8688	0	0	19.8688	0	19.8688	3.31147	0	0	3.31147	0	0	83.3333	67621.8	0	0	67621.8	152646	0	0	152646
556	Kalabahi	Indonesia	Asia	South-Eastern Asia	-8.21777	124.525	1980	2030	10	1	FULL	0	0	2	0	2	11.922	0	0	11.922	0	11.922	13.9087	0	0	13.9087	0	13.9087	1.98669	0	0	1.98669	0	1.98669	0.198669	0	0	0.198669	0	0	20	52276.6	0	0	52276.6	76662.9	0	0	76662.9
558	Kanazawa	Japan	Asia	Eastern Asia	36.5688	136.625	1975	2030	11	5	FULL	0	0	6	0	6	132.703	0	0	132.703	0	132.703	172.613	0	0	172.613	0	172.613	39.9104	0	0	39.9104	0	39.9104	3.62822	0	0	3.62822	0	0	54.5455	404120	0	0	404120	510619	0	0	510619
559	Kani	Japan	Asia	Eastern Asia	35.428	137.046	1975	2030	11	5	FULL	0	0	5	0	5	36.9201	0	0	36.9201	0	36.9201	53.8829	0	0	53.8829	0	53.8829	16.9628	0	0	16.9628	0	16.9628	1.54207	0	0	1.54207	0	0	45.4545	92439.5	0	0	92439.5	100020	0	0	100020
561	Kanyabayonga	Dem. Rep. Congo	Africa	Middle Africa	-0.701209	29.1754	1975	2030	11	6	FULL	0	0	3	0	3	4.96973	0	0	4.96973	0	4.96973	10.9338	0	0	10.9338	0	10.9338	5.96405	0	0	5.96405	0	5.96405	0.542187	0	0	0.542187	0	0	27.2727	64140.6	0	0	64140.6	117937	0	0	117937
562	Karaj	Iran	Asia	Southern Asia	35.7542	50.9896	1975	2030	11	1	PARTIAL	0	0	8	0	8	147.566	0	0	7.1028	0	7.1028	338.006	0	0	48.8632	0	48.8632	190.441	0	0	41.7604	0	41.7604	17.3128	0	0	3.7964	0	0	72.7273	837567	0	0	14342.9	3.87526e+06	0	0	243381
563	Karamile	Ethiopia	Africa	Eastern Africa	9.37429	41.3734	1995	2030	7	1	FULL	0	0	2	0	2	4.97271	0	0	4.97271	0	4.97271	10.9397	0	0	10.9397	0	10.9397	5.96701	0	0	5.96701	0	5.96701	0.852429	0	0	0.852429	0	0	28.5714	59501	0	0	59501	95706.1	0	0	95706.1
564	Karang Kliwon	Indonesia	Asia	South-Eastern Asia	-7.70721	112.999	1980	2030	10	8	FULL	0	5	5	5	0	30.8123	0	30.8007	30.8123	30.8007	0	41.7449	0	41.7333	41.7449	41.7333	0	10.9326	0	10.9326	10.9326	10.9326	0	1.09326	0	1.09326	1.09326	0	50	0	80630.8	0	80630.8	80630.8	107370	0	107370	107370
565	Karangampel	Indonesia	Asia	South-Eastern Asia	-6.47195	108.443	1995	2030	7	6	FULL	0	0	1	0	1	13.9252	0	0	13.9252	0	13.9252	19.8932	0	0	19.8932	0	19.8932	5.96795	0	0	5.96795	0	5.96795	0.852565	0	0	0.852565	0	0	14.2857	54748.5	0	0	54748.5	75222.5	0	0	75222.5
568	Karangasem	Indonesia	Asia	South-Eastern Asia	-8.44834	115.599	1980	2030	10	4	FULL	0	4	4	4	0	13.9077	0	13.9077	13.9077	13.9077	0	22.8477	0	22.8477	22.8477	22.8477	0	8.94006	0	8.94006	8.94006	8.94006	0	0.894006	0	0.894006	0.894006	0	40	0	56698.9	0	56698.9	56698.9	90761	0	90761	90761
569	Karangwareng	Indonesia	Asia	South-Eastern Asia	-6.84553	108.635	1980	2030	10	6	FULL	0	4	4	4	0	13.9212	0	13.9212	13.9212	13.9212	0	38.7734	0	38.7734	38.7734	38.7734	0	24.8521	0	24.8521	24.8521	24.8521	0	2.48521	0	2.48521	2.48521	0	40	0	55304.4	0	55304.4	55304.4	146968	0	146968	146968
570	Karatsu	Japan	Asia	Eastern Asia	33.4517	129.978	1975	2030	11	1	FULL	0	0	2	0	2	26.9126	0	0	26.9126	0	26.9126	36.8814	0	0	36.8814	0	36.8814	9.96876	0	0	9.96876	0	9.96876	0.906251	0	0	0.906251	0	0	18.1818	74184.8	0	0	74184.8	63729.5	0	0	63729.5
572	Kars	Turkey	Asia	Western Asia	40.5995	43.094	1985	2030	9	1	FULL	0	0	4	0	4	9.98835	0	0	9.98835	0	9.98835	14.9825	0	0	14.9825	0	14.9825	4.99416	0	0	4.99416	0	4.99416	0.554906	0	0	0.554906	0	0	44.4444	54071.7	0	0	54071.7	74720.6	0	0	74720.6
573	Karyamakmur	Indonesia	Asia	South-Eastern Asia	-6.08509	107.201	2015	2030	3	4	FULL	0	0	1	0	1	22.8649	0	0	22.8649	0	22.8649	26.8409	0	0	26.8409	0	26.8409	3.97603	0	0	3.97603	0	3.97603	1.32534	0	0	1.32534	0	0	33.3333	62937.4	0	0	62937.4	74755.4	0	0	74755.4
574	Kas	Sudan	Africa	Northern Africa	12.5073	24.2879	1975	2030	11	1	FULL	0	0	6	0	6	7.96218	0	0	7.96218	0	7.96218	18.9109	0	0	18.9109	0	18.9109	10.9487	0	0	10.9487	0	10.9487	0.995336	0	0	0.995336	0	0	54.5455	54495.3	0	0	54495.3	441791	0	0	441791
575	Kasese	Uganda	Africa	Eastern Africa	0.179662	30.0817	2000	2030	6	5	FULL	0	0	4	0	4	13.9314	0	0	13.9314	0	13.9314	18.9068	0	0	18.9068	0	18.9068	4.97538	0	0	4.97538	0	4.97538	0.829231	0	0	0.829231	0	0	66.6667	56416.5	0	0	56416.5	107322	0	0	107322
576	Kashiwazaki	Japan	Asia	Eastern Asia	37.3688	138.564	1975	2030	11	9	FULL	0	0	3	0	3	17.9736	0	0	17.9736	0	17.9736	16.9738	0	0	16.9738	0	16.9738	-0.999828	0	0	-0.999828	0	-0.999828	-0.0908934	0	0	-0.0908934	0	0	27.2727	71817.1	0	0	71817.1	50479.5	0	0	50479.5
577	Kayseri	Turkey	Asia	Western Asia	38.7455	35.5239	1975	2030	11	1	FULL	0	11	11	11	4	40.9567	0	33.5659	40.9567	33.5659	7.39079	170.815	0	154.282	170.815	154.282	16.5332	129.858	0	120.716	129.858	120.716	9.14242	11.8053	0	10.9742	11.8053	0	100	36.3636	120042	0	91340.6	120042	928368	0	795264	928368
578	Keban Agung	Indonesia	Asia	South-Eastern Asia	-3.75629	103.799	1975	2030	11	2	FULL	0	0	4	0	4	10.9227	0	0	10.9227	0	10.9227	14.8941	0	0	14.8941	0	14.8941	3.97142	0	0	3.97142	0	3.97142	0.361039	0	0	0.361039	0	0	36.3636	88081.8	0	0	88081.8	93789.4	0	0	93789.4
579	Kebkabiya	Sudan	Africa	Northern Africa	13.6482	24.0936	1975	2030	11	1	FULL	0	0	6	0	6	9.95679	0	0	9.95679	0	9.95679	20.9096	0	0	20.9096	0	20.9096	10.9529	0	0	10.9529	0	10.9529	0.995714	0	0	0.995714	0	0	54.5455	111289	0	0	111289	838391	0	0	838391
581	Kebonan	Indonesia	Asia	South-Eastern Asia	-8.31149	113.464	1990	2030	8	6	FULL	0	0	2	0	2	23.8708	0	0	23.8708	0	23.8708	43.7615	0	0	43.7615	0	43.7615	19.8907	0	0	19.8907	0	19.8907	2.48634	0	0	2.48634	0	0	25	87553.9	0	0	87553.9	137757	0	0	137757
582	Kebumen	Indonesia	Asia	South-Eastern Asia	-7.67402	109.662	1975	2030	11	6	FULL	0	0	7	0	7	48.6723	0	0	48.6723	0	48.6723	69.5289	0	0	69.5289	0	69.5289	20.8566	0	0	20.8566	0	20.8566	1.89605	0	0	1.89605	0	0	63.6364	478529	0	0	478529	282037	0	0	282037
583	Kecamatan Pringgabaya	Indonesia	Asia	South-Eastern Asia	-8.56938	116.619	1990	2030	8	1	FULL	0	2	2	2	0	10.922	0	10.922	10.922	10.922	0	15.8858	0	15.8858	15.8858	15.8858	0	4.96388	0	4.96388	4.96388	4.96388	0	0.620485	0	0.620485	0.620485	0	25	0	51038.6	0	51038.6	51038.6	75223	0	75223	75223
584	Kedawang	Indonesia	Asia	South-Eastern Asia	-7.72784	113.108	2000	2030	6	8	FULL	0	1	1	1	0	28.8283	0	17.1649	28.8283	17.1649	11.6635	28.8283	0	17.1649	28.8283	17.1649	11.6635	0	0	0	0	0	0	0	0	0	0	0	16.6667	0	66667.4	0	53912.9	66667.4	58003.7	0	45918.4	58003.7
585	Kediri	Indonesia	Asia	South-Eastern Asia	-7.81338	112.031	1975	2030	11	8	FULL	0	5	6	5	4	86.3991	0	56.3352	86.3991	56.3352	30.064	119.169	0	82.5924	119.169	82.5924	36.577	32.7703	0	26.2573	32.7703	26.2573	6.51299	2.97911	0	2.38703	2.97911	0	45.4545	36.3636	358460	0	241149	358460	515673	0	382310	515673
586	Kefole	Ethiopia	Africa	Eastern Africa	7.07553	38.7865	1975	2030	11	6	FULL	0	0	6	0	6	3.97091	0	0	3.97091	0	3.97091	12.9055	0	0	12.9055	0	12.9055	8.93458	0	0	8.93458	0	8.93458	0.812235	0	0	0.812235	0	0	54.5455	52069.3	0	0	52069.3	153704	0	0	153704
587	Kelibia	Tunisia	Africa	Northern Africa	36.8443	11.0974	2015	2030	3	1	FULL	0	0	0	0	0	13.9738	0	0	13.9738	0	13.9738	13.9738	0	0	13.9738	0	13.9738	0	0	0	0	0	0	0	0	0	0	0	0	0	50670.9	0	0	50670.9	55838.2	0	0	55838.2
588	Kembata Tembaro	Ethiopia	Africa	Eastern Africa	7.28401	37.543	1995	2030	7	3	FULL	0	0	3	0	3	4.96675	0	0	4.96675	0	4.96675	8.94029	0	0	8.94029	0	8.94029	3.97355	0	0	3.97355	0	3.97355	0.56765	0	0	0.56765	0	0	42.8571	62509	0	0	62509	55692.1	0	0	55692.1
590	Kencong	Indonesia	Asia	South-Eastern Asia	-8.27042	113.362	1985	2030	9	6	FULL	0	0	0	0	0	14.9166	0	0.96779	14.9166	0.96779	13.9489	14.9166	0	0.96779	14.9166	0.96779	13.9489	0	0	0	0	0	0	0	0	0	0	0	0	0	68172.4	0	2310.53	68172.4	66068.1	0	2483.92	66068.1
592	Kepanjen	Indonesia	Asia	South-Eastern Asia	-8.12751	112.568	1975	2030	11	8	FULL	0	3	3	3	1	14.902	0	14.902	14.902	14.902	0	28.8112	0	26.6111	28.8112	26.6111	2.20007	13.9092	0	11.7091	13.9092	11.7091	2.20007	1.26447	0	1.06447	1.26447	0	27.2727	9.09091	64490.8	0	64490.8	64490.8	93975.7	0	87846.4	93975.7
593	Kersa	Ethiopia	Africa	Eastern Africa	7.52985	38.9814	1990	2030	8	8	FULL	0	0	2	0	2	3.97096	0	0	3.97096	0	3.97096	6.94933	0	0	6.94933	0	6.94933	2.97838	0	0	2.97838	0	2.97838	0.372297	0	0	0.372297	0	0	25	52078.5	0	0	52078.5	55828.2	0	0	55828.2
594	Kersana	Indonesia	Asia	South-Eastern Asia	-6.93733	108.886	1975	2030	11	5	FULL	0	0	5	0	5	12.9227	0	0	12.9227	0	12.9227	54.6738	0	0	54.6738	0	54.6738	41.7511	0	0	41.7511	0	41.7511	3.79555	0	0	3.79555	0	0	45.4545	67592.3	0	0	67592.3	171713	0	0	171713
595	Kertasari	Indonesia	Asia	South-Eastern Asia	-6.81599	107.293	1990	2030	8	11	FULL	0	0	3	0	3	13.9198	0	0	13.9198	0	13.9198	21.8742	0	0	21.8742	0	21.8742	7.95434	0	0	7.95434	0	7.95434	0.994293	0	0	0.994293	0	0	37.5	52997.8	0	0	52997.8	76064.5	0	0	76064.5
597	Keshan	China	Asia	Eastern Asia	48.0287	125.866	1975	2030	11	1	FULL	0	0	2	0	2	9.00918	0	0	9.00918	0	9.00918	11.0119	0	0	11.0119	0	11.0119	2.00269	0	0	2.00269	0	2.00269	0.182062	0	0	0.182062	0	0	18.1818	57901	0	0	57901	51664.8	0	0	51664.8
598	Khamir	Yemen	Asia	Western Asia	15.9881	43.9522	2000	2030	6	1	FULL	0	0	3	0	3	3.97532	0	0	3.97532	0	3.97532	7.9505	0	0	7.9505	0	7.9505	3.97519	0	0	3.97519	0	3.97519	0.662531	0	0	0.662531	0	0	50	53095.3	0	0	53095.3	96731	0	0	96731
599	Khayran	Yemen	Asia	Western Asia	16.0251	43.3744	2010	2030	4	1	FULL	0	0	2	0	2	1.98854	0	0	1.98854	0	1.98854	7.95407	0	0	7.95407	0	7.95407	5.96554	0	0	5.96554	0	5.96554	1.49138	0	0	1.49138	0	0	50	50975.5	0	0	50975.5	133192	0	0	133192
600	Khureit (Al Kuma)	Sudan	Africa	Northern Africa	13.9598	26.0203	2015	2030	3	1	FULL	0	0	2	0	2	5.96136	0	0	5.96136	0	5.96136	8.942	0	0	8.942	0	8.942	2.98064	0	0	2.98064	0	2.98064	0.993545	0	0	0.993545	0	0	66.6667	60682.5	0	0	60682.5	99529.5	0	0	99529.5
601	Kiambu	Kenya	Africa	Eastern Africa	-1.16394	36.8241	2000	2030	6	5	FULL	0	0	2	0	2	16.8973	0	0	16.8973	0	16.8973	23.8552	0	0	23.8552	0	23.8552	6.95791	0	0	6.95791	0	6.95791	1.15965	0	0	1.15965	0	0	33.3333	52642.3	0	0	52642.3	75973.6	0	0	75973.6
602	Kibet	Ethiopia	Africa	Eastern Africa	8.02495	38.3272	1980	2030	10	8	FULL	4	4	4	0	0	3.97162	3.97162	3.97162	3.97162	0	0	8.93602	8.93602	8.93602	8.93602	0	0	4.9644	4.9644	4.9644	4.9644	0	0	0.49644	0.49644	0.49644	0.49644	40	0	0	57218.8	57218.8	57218.8	57218.8	80973.3	80973.3	80973.3	80973.3
603	Kidapawan	Philippines	Asia	South-Eastern Asia	7.00928	125.086	2010	2030	4	4	FULL	0	0	3	0	3	11.9286	0	0	11.9286	0	11.9286	24.8508	0	0	24.8508	0	24.8508	12.9221	0	0	12.9221	0	12.9221	3.23053	0	0	3.23053	0	0	75	55619.2	0	0	55619.2	110747	0	0	110747
604	Kigali	Rwanda	Africa	Eastern Africa	-1.95582	30.0793	1975	2030	11	5	FULL	0	0	11	0	11	41.7935	0	0	41.7935	0	41.7935	302.499	0	0	302.499	0	302.499	260.706	0	0	260.706	0	260.706	23.7005	0	0	23.7005	0	0	100	69468.9	0	0	69468.9	1.9725e+06	0	0	1.9725e+06
605	Kipese	Dem. Rep. Congo	Africa	Middle Africa	-0.241822	29.2919	2005	2030	5	2	FULL	0	0	1	0	1	4.97057	0	0	4.97057	0	4.97057	6.95877	0	0	6.95877	0	6.95877	1.98819	0	0	1.98819	0	1.98819	0.397638	0	0	0.397638	0	0	20	52132.1	0	0	52132.1	89015.6	0	0	89015.6
606	Kirishima	Japan	Asia	Eastern Asia	31.7382	130.752	1975	2030	11	4	FULL	0	1	1	1	0	36.884	0	36.884	36.884	36.884	0	28.9092	0	28.9092	28.9092	28.9092	0	-7.97488	0	-7.97488	-7.97488	-7.97488	0	-0.724989	0	-0.724989	-0.724989	0	9.09091	0	101806	0	101806	101806	72321.7	0	72321.7	72321.7
607	Kirumba	Dem. Rep. Congo	Africa	Middle Africa	-0.561086	29.1821	1980	2030	10	3	FULL	0	0	4	0	4	7.95175	0	0	7.95175	0	7.95175	12.9216	0	0	12.9216	0	12.9216	4.96983	0	0	4.96983	0	4.96983	0.496983	0	0	0.496983	0	0	40	56334.5	0	0	56334.5	171280	0	0	171280
608	Kisaran	Indonesia	Asia	South-Eastern Asia	2.97654	99.635	1975	2030	11	1	PARTIAL	0	0	4	0	4	16.8759	0	0	16.8759	0	16.8759	29.7809	0	0	25.3961	0	25.3961	12.905	0	0	8.52024	0	8.52024	1.17318	0	0	0.774568	0	0	36.3636	162116	0	0	162116	187797	0	0	170878
609	Kisarazu	Japan	Asia	Eastern Asia	35.3582	139.893	1975	2030	11	4	FULL	0	0	6	0	6	50.8591	0	0	50.8591	0	50.8591	79.7787	0	0	79.7787	0	79.7787	28.9196	0	0	28.9196	0	28.9196	2.62905	0	0	2.62905	0	0	54.5455	126416	0	0	126416	164572	0	0	164572
610	Kisii	Kenya	Africa	Eastern Africa	-0.669793	34.7727	1990	2030	8	1	FULL	0	0	7	0	7	18.8759	0	0	18.8759	0	18.8759	72.5232	0	0	72.5232	0	72.5232	53.6473	0	0	53.6473	0	53.6473	6.70591	0	0	6.70591	0	0	87.5	60201	0	0	60201	218458	0	0	218458
611	Kislovodsk	Russia	Europe	Eastern Europe	43.9172	42.7182	1975	2030	11	1	FULL	0	0	1	0	1	21.9942	0	0	21.9942	0	21.9942	20.9948	0	0	20.9948	0	20.9948	-0.999304	0	0	-0.999304	0	-0.999304	-0.0908459	0	0	-0.0908459	0	0	9.09091	93688.6	0	0	93688.6	123465	0	0	123465
612	Kisumu	Kenya	Africa	Eastern Africa	-0.101695	34.7694	1975	2030	11	1	FULL	0	0	7	0	7	26.824	0	0	26.824	0	26.824	104.312	0	0	104.312	0	104.312	77.4882	0	0	77.4882	0	77.4882	7.04438	0	0	7.04438	0	0	63.6364	79096	0	0	79096	582539	0	0	582539
614	Kitakyushu	Japan	Asia	Eastern Asia	33.9053	130.848	1975	2030	11	3	FULL	0	0	7	0	7	322.155	0	0	322.155	0	322.155	388.98	0	0	388.98	0	388.98	66.825	0	0	66.825	0	66.825	6.075	0	0	6.075	0	0	63.6364	1.06418e+06	0	0	1.06418e+06	1.18811e+06	0	0	1.18811e+06
615	Kitami	Japan	Asia	Eastern Asia	43.8068	143.879	1975	2030	11	7	FULL	0	0	2	0	2	26.0049	0	0	26.0049	0	26.0049	27.0055	0	0	27.0055	0	27.0055	1.00066	0	0	1.00066	0	1.00066	0.0909688	0	0	0.0909688	0	0	18.1818	106944	0	0	106944	77765	0	0	77765
616	Kitchanga	Dem. Rep. Congo	Africa	Middle Africa	-1.25421	29.0603	2015	2030	3	6	FULL	0	1	1	1	0	6.95652	0	6.95652	6.95652	6.95652	0	7.95018	0	7.95018	7.95018	7.95018	0	0.993661	0	0.993661	0.993661	0.993661	0	0.33122	0	0.33122	0.33122	0	33.3333	0	51971.7	0	51971.7	51971.7	67012	0	67012	67012
617	Kitengela	Kenya	Africa	Eastern Africa	-1.4798	36.9565	2010	2030	4	3	FULL	0	0	2	0	2	12.9193	0	0	12.9193	0	12.9193	14.9069	0	0	14.9069	0	14.9069	1.98752	0	0	1.98752	0	1.98752	0.49688	0	0	0.49688	0	0	50	51766.5	0	0	51766.5	57160.3	0	0	57160.3
618	Kitsombiro	Dem. Rep. Congo	Africa	Middle Africa	-0.26914	29.2002	2010	2030	4	2	FULL	0	0	0	0	0	8.94588	0	0	8.94588	0	8.94588	8.94588	0	0	8.94588	0	8.94588	0	0	0	0	0	0	0	0	0	0	0	0	0	53577.9	0	0	53577.9	76335	0	0	76335
619	Kiziltepe	Turkey	Asia	Western Asia	37.1939	40.5876	1995	2030	7	1	FULL	0	0	4	0	4	9.97841	0	0	9.97841	0	9.97841	15.9666	0	0	15.9666	0	15.9666	5.98815	0	0	5.98815	0	5.98815	0.855451	0	0	0.855451	0	0	57.1429	57747.5	0	0	57747.5	128294	0	0	128294
620	KK Market Centre	Kenya	Africa	Eastern Africa	0.294725	37.9461	2015	2030	3	1	FULL	1	1	1	1	0	33.7576	10.9863	33.7576	33.7576	22.7713	0	35.7427	12.1243	35.7427	35.7427	23.6184	0	1.9851	1.13802	1.9851	1.9851	0.847079	0	0.6617	0.37934	0.6617	0.6617	33.3333	33.3333	0	63043.3	22468.5	63043.3	63043.3	64975.1	24834.9	64975.1	64975.1
622	Kluwut	Indonesia	Asia	South-Eastern Asia	-6.87239	108.93	1975	2030	11	3	FULL	0	0	0	0	0	10.9341	0	0	10.9341	0	10.9341	10.9341	0	0	10.9341	0	10.9341	0	0	0	0	0	0	0	0	0	0	0	0	0	66562.3	0	0	66562.3	57037.7	0	0	57037.7
623	Koblenz	Germany	Europe	Western Europe	50.3606	7.58635	1975	2030	11	1	FULL	0	0	7	0	7	35.0243	0	0	35.0243	0	35.0243	53.0369	0	0	53.0369	0	53.0369	18.0126	0	0	18.0126	0	18.0126	1.63751	0	0	1.63751	0	0	63.6364	103721	0	0	103721	134996	0	0	134996
624	Kobo	Ethiopia	Africa	Eastern Africa	12.1554	39.6376	1975	2030	11	2	FULL	0	0	3	0	3	7.94575	0	0	7.94575	0	7.94575	10.9255	0	0	10.9255	0	10.9255	2.97973	0	0	2.97973	0	2.97973	0.270884	0	0	0.270884	0	0	27.2727	85508.8	0	0	85508.8	122641	0	0	122641
625	Kofu	Japan	Asia	Eastern Asia	35.6492	138.564	1975	2030	11	9	FULL	0	0	4	0	4	147.741	0	0	147.741	0	147.741	157.724	0	0	157.724	0	157.724	9.98327	0	0	9.98327	0	9.98327	0.90757	0	0	0.90757	0	0	36.3636	393678	0	0	393678	342229	0	0	342229
626	Kokosa	Ethiopia	Africa	Eastern Africa	6.74165	38.7913	2005	2030	5	4	FULL	0	0	1	0	1	2.97813	0	0	2.97813	0	2.97813	3.97083	0	0	3.97083	0	3.97083	0.992696	0	0	0.992696	0	0.992696	0.198539	0	0	0.198539	0	0	20	57300.4	0	0	57300.4	58169.2	0	0	58169.2
627	Koksan	North Korea	Asia	Eastern Asia	38.7837	126.667	1975	2030	11	1	FULL	0	0	0	0	0	3.99502	0	0	3.99502	0	3.99502	3.99502	0	0	3.99502	0	3.99502	0	0	0	0	0	0	0	0	0	0	0	0	0	73114.3	0	0	73114.3	92481.6	0	0	92481.6
628	Kolofo'ou	Tonga	Oceania	Polynesia	-21.1443	-175.203	2025	2030	1	5	FULL	0	0	0	0	0	19.9027	0	0	19.9027	0	19.9027	19.9027	0	0	19.9027	0	19.9027	0	0	0	0	0	0	0	0	0	0	0	0	0	51990.8	0	0	51990.8	55171	0	0	55171
630	Kombolcha	Ethiopia	Africa	Eastern Africa	11.0807	39.7304	1975	2030	11	1	PARTIAL	0	0	6	0	6	16.8838	0	0	14.6963	0	14.6963	29.7952	0	0	24.8965	0	24.8965	12.9114	0	0	10.2002	0	10.2002	1.17376	0	0	0.927295	0	0	54.5455	117714	0	0	112610	292368	0	0	273303
631	Korem	Ethiopia	Africa	Eastern Africa	12.5118	39.5182	1995	2030	7	2	FULL	0	0	1	0	1	4.96602	0	0	4.96602	0	4.96602	5.95923	0	0	5.95923	0	5.95923	0.993212	0	0	0.993212	0	0.993212	0.141887	0	0	0.141887	0	0	14.2857	50218.5	0	0	50218.5	68079.8	0	0	68079.8
632	Koriyama	Japan	Asia	Eastern Asia	37.3916	140.366	1975	2030	11	9	FULL	0	4	5	4	4	37.9052	0	23.6788	37.9052	23.6788	14.2264	61.8459	0	40.0357	61.8459	40.0357	21.8102	23.9407	0	16.3569	23.9407	16.3569	7.58374	2.17642	0	1.48699	2.17642	0	36.3636	36.3636	99244.3	0	66359.9	99244.3	200639	0	136339	200639
633	Koronadal	Philippines	Asia	South-Eastern Asia	6.48568	124.851	2000	2030	6	2	FULL	0	5	5	5	3	16.8928	0	13.7949	16.8928	13.7949	3.09791	34.7803	0	27.6238	34.7803	27.6238	7.15656	17.8876	0	13.8289	17.8876	13.8289	4.05865	2.98126	0	2.30482	2.98126	0	83.3333	50	55657.5	0	49860.4	55657.5	148129	0	129157	148129
634	Kosan	North Korea	Asia	Eastern Asia	38.8575	127.419	1975	2030	11	1	FULL	0	0	2	0	2	4.99098	0	0	4.99098	0	4.99098	6.98728	0	0	6.98728	0	6.98728	1.9963	0	0	1.9963	0	1.9963	0.181482	0	0	0.181482	0	0	18.1818	71608.6	0	0	71608.6	78873.1	0	0	78873.1
635	Kotaanyar	Indonesia	Asia	South-Eastern Asia	-7.72868	113.522	1980	2030	10	9	FULL	0	3	3	3	1	16.9091	0	16.8426	16.9091	16.8426	0	40.7799	0	39.2243	40.7799	39.2243	1.55564	23.8708	0	22.3816	23.8708	22.3816	1.55564	2.38708	0	2.23816	2.38708	0	30	10	54634.5	0	54632.6	54634.5	96578.3	0	95911.8	96578.3
636	Kotabumi	Indonesia	Asia	South-Eastern Asia	-4.83702	104.896	1975	2030	11	1	FULL	0	0	5	0	5	19.852	0	0	19.852	0	19.852	31.7631	0	0	31.7631	0	31.7631	11.9111	0	0	11.9111	0	11.9111	1.08283	0	0	1.08283	0	0	45.4545	172906	0	0	172906	188786	0	0	188786
637	Kotamobagu	Indonesia	Asia	South-Eastern Asia	0.738786	124.309	1980	2030	10	4	FULL	0	5	5	5	0	12.9096	0	12.9096	12.9096	12.9096	0	26.8181	0	26.8181	26.8181	26.8181	0	13.9085	0	13.9085	13.9085	13.9085	0	1.39085	0	1.39085	1.39085	0	50	0	54752	0	54752	54752	148924	0	148924	148924
638	Kraksaan	Indonesia	Asia	South-Eastern Asia	-7.75979	113.419	1975	2030	11	9	FULL	0	3	3	3	0	11.934	0	11.934	11.934	11.934	0	21.8794	0	21.8794	21.8794	21.8794	0	9.94544	0	9.94544	9.94544	9.94544	0	0.904131	0	0.904131	0.904131	0	27.2727	0	69199.9	0	69199.9	69199.9	75921.9	0	75921.9	75921.9
639	Kudus	Indonesia	Asia	South-Eastern Asia	-6.80304	110.834	1975	2030	11	3	FULL	0	0	8	0	8	51.6204	0	0	51.6204	0	51.6204	157.84	0	0	157.84	0	157.84	106.219	0	0	106.219	0	106.219	9.65629	0	0	9.65629	0	0	72.7273	348084	0	0	348084	615550	0	0	615550
640	Kuhlan Ash Sharaf	Yemen	Asia	Western Asia	16.0005	43.4606	2025	2030	1	1	FULL	0	0	0	0	0	3.97664	0	0	3.97664	0	3.97664	3.97664	0	0	3.97664	0	3.97664	0	0	0	0	0	0	0	0	0	0	0	0	0	55298.4	0	0	55298.4	62470.8	0	0	62470.8
641	Kumagaya	Japan	Asia	Eastern Asia	36.1494	139.381	1975	2030	11	12	FULL	0	0	7	0	7	16.9602	0	0	16.9602	0	16.9602	25.9398	0	0	25.9398	0	25.9398	8.97957	0	0	8.97957	0	8.97957	0.816324	0	0	0.816324	0	0	63.6364	60354.3	0	0	60354.3	71016.1	0	0	71016.1
642	Kumamoto	Japan	Asia	Eastern Asia	32.8114	130.737	1975	2030	11	5	FULL	0	5	8	5	7	129.619	0	23.9909	129.619	23.9909	105.628	162.524	0	36.0598	162.524	36.0598	126.465	32.9053	0	12.0689	32.9053	12.0689	20.8364	2.99139	0	1.09717	2.99139	0	45.4545	63.6364	433608	0	68971.6	433608	596149	0	96032	596149
643	Kumba	Cameroon	Africa	Middle Africa	4.63415	9.44606	1975	2030	11	2	FULL	0	0	7	0	7	19.8531	0	0	19.8531	0	19.8531	34.7432	0	0.753562	34.7432	0.753562	33.9896	14.89	0	0.753562	14.89	0.753562	14.1365	1.35364	0	0.0685057	1.35364	0	0	63.6364	109567	0	0	109567	327904	0	781.378	327904
644	Kumbo	Cameroon	Africa	Middle Africa	6.20892	10.6825	1975	2030	11	1	FULL	0	7	7	7	0	7.94818	0	7.94818	7.94818	7.94818	0	24.838	0	24.838	24.838	24.838	0	16.8898	0	16.8898	16.8898	16.8898	0	1.53544	0	1.53544	1.53544	0	63.6364	0	57671	0	57671	57671	129943	0	129943	129943
645	Kuningan	Indonesia	Asia	South-Eastern Asia	-6.94532	108.486	1975	2030	11	9	FULL	3	10	10	10	1	84.5415	32.3938	84.5415	84.5415	52.1477	0	205.875	45.4291	203.019	205.875	157.59	2.85548	121.333	13.0353	118.478	121.333	105.442	2.85548	11.0303	1.18502	10.7707	11.0303	27.2727	90.9091	9.09091	276325	86851.5	276325	276325	732977	175285	727701	732977
646	Kure	Japan	Asia	Eastern Asia	34.2396	132.556	1975	2030	11	2	PARTIAL	0	0	0	0	0	21.9563	0	0	20.3513	0	20.3513	21.9563	0	0	20.3513	0	20.3513	0	0	0	0	0	0	0	0	0	0	0	0	0	107161	0	0	96251.7	90835.6	0	0	80705.9
649	Kurume	Japan	Asia	Eastern Asia	33.3077	130.527	1975	2030	11	4	FULL	0	0	5	0	5	35.8931	0	0	35.8931	0	35.8931	45.8643	0	0	45.8643	0	45.8643	9.97121	0	0	9.97121	0	9.97121	0.906473	0	0	0.906473	0	0	45.4545	154000	0	0	154000	172222	0	0	172222
650	Kushiro	Japan	Asia	Eastern Asia	42.9922	144.38	1975	2030	11	3	FULL	0	0	3	0	3	63.9886	0	0	63.9886	0	63.9886	66.9931	0	0	66.9931	0	66.9931	3.00452	0	0	3.00452	0	3.00452	0.273138	0	0	0.273138	0	0	27.2727	170019	0	0	170019	134493	0	0	134493
651	Kutoarjo	Indonesia	Asia	South-Eastern Asia	-7.72499	109.906	1975	2030	11	6	FULL	0	0	5	0	5	10.9242	0	0	10.9242	0	10.9242	19.8626	0	0	19.8626	0	19.8626	8.93841	0	0	8.93841	0	8.93841	0.812583	0	0	0.812583	0	0	45.4545	167293	0	0	167293	83532	0	0	83532
652	Kyaukpadaung	Myanmar	Asia	South-Eastern Asia	20.8418	95.1257	1995	2030	7	1	FULL	0	2	2	2	0	7.96307	0	7.96307	7.96307	7.96307	0	9.95351	0	9.95351	9.95351	9.95351	0	1.99044	0	1.99044	1.99044	1.99044	0	0.284349	0	0.284349	0.284349	0	28.5714	0	53362.9	0	53362.9	53362.9	68482.6	0	68482.6	68482.6
653	Kyela	Tanzania	Africa	Eastern Africa	-9.59644	33.8712	2020	2030	2	3	FULL	0	0	2	0	2	12.9103	0	0	12.9103	0	12.9103	15.8896	0	0	15.8896	0	15.8896	2.97922	0	0	2.97922	0	2.97922	1.48961	0	0	1.48961	0	0	100	59651.8	0	0	59651.8	82728.3	0	0	82728.3
655	La Dorada	Colombia	South America	South America	5.46204	-74.6639	1990	2030	8	3	FULL	0	0	2	0	2	12.9049	0	0	12.9049	0	12.9049	15.8825	0	0	15.8825	0	15.8825	2.9776	0	0	2.9776	0	2.9776	0.3722	0	0	0.3722	0	0	25	59029.5	0	0	59029.5	79621.1	0	0	79621.1
656	La Lima	Honduras	North America	Central America	15.4342	-87.9178	2025	2030	1	1	FULL	0	0	0	0	0	10.9306	0	0	10.9306	0	10.9306	10.9306	0	0	10.9306	0	10.9306	0	0	0	0	0	0	0	0	0	0	0	0	0	51353.2	0	0	51353.2	55855.9	0	0	55855.9
657	La Orotava	Spain	Europe	Southern Europe	28.4019	-16.5406	2010	2030	4	1	FULL	0	0	0	0	0	17.9295	0	17.9295	17.9295	17.9295	0	17.9295	0	17.9295	17.9295	17.9295	0	0	0	0	0	0	0	0	0	0	0	0	0	0	55853.3	0	55853.3	55853.3	54979.2	0	54979.2	54979.2
658	La Piedad de Cabadas	Mexico	North America	Central America	20.3447	-102.028	1995	2030	7	1	FULL	0	0	5	0	5	12.9547	0	0	12.9547	0	12.9547	28.8933	0	0	28.8933	0	28.8933	15.9387	0	0	15.9387	0	15.9387	2.27695	0	0	2.27695	0	0	71.4286	51709	0	0	51709	121176	0	0	121176
659	Labuan Bajo	Indonesia	Asia	South-Eastern Asia	-8.4951	119.889	2015	2030	3	3	FULL	0	0	0	0	0	14.9297	0	9.09333	14.9297	9.09333	5.83636	14.9297	0	9.09333	14.9297	9.09333	5.83636	0	0	0	0	0	0	0	0	0	0	0	0	0	64744.9	0	50415.8	64744.9	69991.5	0	54176.7	69991.5
660	Labuha	Indonesia	Asia	South-Eastern Asia	-0.65157	127.481	2015	2030	3	3	FULL	0	1	1	1	0	15.8891	0	15.8891	15.8891	15.8891	0	17.8754	0	17.8754	17.8754	17.8754	0	1.98624	0	1.98624	1.98624	1.98624	0	0.662078	0	0.662078	0.662078	0	33.3333	0	61874.6	0	61874.6	61874.6	96761.2	0	96761.2	96761.2
661	Lahat	Indonesia	Asia	South-Eastern Asia	-3.78528	103.547	1975	2030	11	2	FULL	0	0	2	0	2	14.8979	0	0	14.8979	0	14.8979	16.8843	0	0	16.8843	0	16.8843	1.98647	0	0	1.98647	0	1.98647	0.180588	0	0	0.180588	0	0	18.1818	128660	0	0	128660	121640	0	0	121640
662	Lala	Philippines	Asia	South-Eastern Asia	7.92416	123.772	2025	2030	1	2	FULL	0	0	1	0	1	11.9099	0	0	11.9099	0	11.9099	18.86	0	0	18.86	0	18.86	6.95012	0	0	6.95012	0	6.95012	6.95012	0	0	6.95012	0	0	100	63360	0	0	63360	84135.3	0	0	84135.3
663	Lamongan	Indonesia	Asia	South-Eastern Asia	-7.12217	112.409	1975	2030	11	4	FULL	0	0	3	0	3	11.9203	0	0	11.9203	0	11.9203	16.8862	0	0	16.8862	0	16.8862	4.96588	0	0	4.96588	0	4.96588	0.451443	0	0	0.451443	0	0	27.2727	70521.8	0	0	70521.8	72760.1	0	0	72760.1
664	Langley City	Canada	North America	Northern America	49.1137	-122.692	2000	2030	6	3	FULL	0	0	5	0	5	31.0065	0	0	31.0065	0	31.0065	44.0103	0	0	44.0103	0	44.0103	13.0038	0	0	13.0038	0	13.0038	2.1673	0	0	2.1673	0	0	83.3333	71327.7	0	0	71327.7	120622	0	0	120622
665	Las Palmas de Gran Canaria	Spain	Europe	Southern Europe	28.1113	-15.4341	1975	2030	11	1	FULL	0	3	3	3	0	40.8157	0	40.8157	40.8157	40.8157	0	50.7706	0	50.7706	50.7706	50.7706	0	9.95495	0	9.95495	9.95495	9.95495	0	0.904996	0	0.904996	0.904996	0	27.2727	0	266885	0	266885	266885	380546	0	380546	380546
666	Latacunga	Ecuador	South America	South America	-0.935041	-78.6202	1995	2030	7	11	FULL	0	2	3	2	2	17.8959	0	2.29957	17.8959	2.29957	15.5963	22.8676	0	4.34246	22.8676	4.34246	18.5251	4.97173	0	2.04289	4.97173	2.04289	2.92885	0.710247	0	0.291841	0.710247	0	28.5714	28.5714	54227.5	0	6419.97	54227.5	89705.9	0	12897.8	89705.9
667	Latina	Italy	Europe	Southern Europe	41.4617	12.896	1980	2030	10	1	FULL	0	0	2	0	2	12.9887	0	0	12.9887	0	12.9887	14.9873	0	0	14.9873	0	14.9873	1.99862	0	0	1.99862	0	1.99862	0.199862	0	0	0.199862	0	0	20	50041.8	0	0	50041.8	82845.7	0	0	82845.7
668	Lawdar	Yemen	Asia	Western Asia	13.8821	45.8664	2005	2030	5	1	FULL	0	0	1	0	1	3.97397	0	0	3.97397	0	3.97397	5.96085	0	0	5.96085	0	5.96085	1.98688	0	0	1.98688	0	1.98688	0.397376	0	0	0.397376	0	0	20	53815.9	0	0	53815.9	92845.7	0	0	92845.7
670	Le Port	RÃ©union	Europe	Western Europe	-20.9524	55.3143	2000	2030	6	1	FULL	0	0	4	0	4	39.7961	0	0	39.7961	0	39.7961	52.7321	0	0	52.7321	0	52.7321	12.936	0	0	12.936	0	12.936	2.156	0	0	2.156	0	0	66.6667	79818	0	0	79818	110497	0	0	110497
671	Le Tampon	RÃ©union	Europe	Western Europe	-21.274	55.5128	2010	2030	4	1	FULL	0	2	2	2	0	20.8918	0	20.8918	20.8918	20.8918	0	23.8758	0	23.8758	23.8758	23.8758	0	2.98395	0	2.98395	2.98395	2.98395	0	0.745989	0	0.745989	0.745989	0	50	0	57933.5	0	57933.5	57933.5	68327.4	0	68327.4	68327.4
672	Legazpi	Philippines	Asia	South-Eastern Asia	13.1504	123.74	1980	2030	10	4	FULL	3	9	9	9	0	31.7882	0	31.7882	31.7882	31.7882	0	74.5015	12.9032	74.5015	74.5015	61.5983	0	42.7133	12.9032	42.7133	42.7133	29.8101	0	4.27133	1.29032	4.27133	4.27133	30	90	0	70216	0	70216	70216	289709	22660.1	289709	289709
673	Leku	Ethiopia	Africa	Eastern Africa	6.87519	38.4465	1975	2030	11	4	FULL	0	0	4	0	4	4.96403	0	0	4.96403	0	4.96403	16.8776	0	0	16.8776	0	16.8776	11.9136	0	0	11.9136	0	11.9136	1.08305	0	0	1.08305	0	0	36.3636	92043.3	0	0	92043.3	161431	0	0	161431
674	Lemery	Philippines	Asia	South-Eastern Asia	13.8749	120.92	2005	2030	5	3	FULL	1	4	4	4	0	15.9134	0	15.9134	15.9134	15.9134	0	67.6262	6.51531	67.6262	67.6262	61.1109	0	51.7128	6.51531	51.7128	51.7128	45.1975	0	10.3426	1.30306	10.3426	10.3426	20	80	0	54573.3	0	54573.3	54573.3	192252	13655.1	192252	192252
675	LeÃ³n	Nicaragua	North America	Central America	12.4382	-86.8794	1975	2030	11	9	FULL	0	7	7	7	0	13.9039	0	13.9039	13.9039	13.9039	0	27.8073	0	27.8073	27.8073	27.8073	0	13.9035	0	13.9035	13.9035	13.9035	0	1.26395	0	1.26395	1.26395	0	63.6364	0	120570	0	120570	120570	152679	0	152679	152679
676	Lewoleba	Indonesia	Asia	South-Eastern Asia	-8.37525	123.423	2015	2030	3	8	FULL	0	0	0	0	0	13.8991	0	13.8991	13.8991	13.8991	0	13.8991	0	13.8991	13.8991	13.8991	0	0	0	0	0	0	0	0	0	0	0	0	0	0	53762.2	0	53762.2	53762.2	59796.1	0	59796.1	59796.1
677	Lhokseumawe	Indonesia	Asia	South-Eastern Asia	5.18135	97.1411	1975	2030	11	2	FULL	0	0	4	0	4	15.8991	0	0	15.8991	0	15.8991	22.8549	0	0	22.8549	0	22.8549	6.9558	0	0	6.9558	0	6.9558	0.632346	0	0	0.632346	0	0	36.3636	59433.2	0	0	59433.2	66178.5	0	0	66178.5
678	Liberia	Costa Rica	North America	Central America	10.6331	-85.4384	2020	2030	2	6	FULL	0	2	2	2	0	11.9242	0	11.9242	11.9242	11.9242	0	13.9112	0	13.9112	13.9112	13.9112	0	1.98701	0	1.98701	1.98701	1.98701	0	0.993503	0	0.993503	0.993503	0	100	0	50045.9	0	50045.9	50045.9	57731.7	0	57731.7	57731.7
679	Lido di Ostia	Italy	Europe	Southern Europe	41.7327	12.2755	1975	2030	11	1	FULL	0	0	2	0	2	10.9966	0	0	10.9966	0	10.9966	11.9962	0	0	11.9962	0	11.9962	0.99956	0	0	0.99956	0	0.99956	0.0908691	0	0	0.0908691	0	0	18.1818	69130.5	0	0	69130.5	82791.2	0	0	82791.2
680	LiÃ¨ge	Belgium	Europe	Western Europe	50.6329	5.56117	1975	2030	11	1	PARTIAL	0	0	1	0	1	105.138	0	0	4.10006	0	4.10006	126.166	0	0	5.07595	0	5.07595	21.0288	0	0	0.975885	0	0.975885	1.91171	0	0	0.0887168	0	0	9.09091	316081	0	0	10621.9	376963	0	0	12049.6
681	Limbe	Cameroon	Africa	Middle Africa	4.01564	9.20562	1975	2030	11	5	FULL	0	7	7	7	0	13.8963	0	13.8963	13.8963	13.8963	0	36.7255	0	36.7255	36.7255	36.7255	0	22.8292	0	22.8292	22.8292	22.8292	0	2.07539	0	2.07539	2.07539	0	63.6364	0	51121.9	0	51121.9	51121.9	227868	0	227868	227868
683	Linares	Chile	South America	South America	-35.8451	-71.5959	2015	2030	3	6	FULL	0	0	0	0	0	14.9757	0	0	14.9757	0	14.9757	14.9757	0	0	14.9757	0	14.9757	0	0	0	0	0	0	0	0	0	0	0	0	0	54380.4	0	0	54380.4	54805.3	0	0	54805.3
684	Lingao County	China	Asia	Eastern Asia	19.9082	109.683	1975	2030	11	1	FULL	0	0	2	0	2	9.94521	0	0	9.94521	0	9.94521	12.9289	0	0	12.9289	0	12.9289	2.98367	0	0	2.98367	0	2.98367	0.271242	0	0	0.271242	0	0	18.1818	67779.4	0	0	67779.4	90664.4	0	0	90664.4
685	Linjiang	China	Asia	Eastern Asia	41.8163	126.917	1975	2030	11	2	FULL	0	0	3	0	3	8.99291	0	0	8.99291	0	8.99291	12.9907	0	0	12.9907	0	12.9907	3.99778	0	0	3.99778	0	3.99778	0.363435	0	0	0.363435	0	0	27.2727	92981.2	0	0	92981.2	79167.8	0	0	79167.8
686	Lipa	Philippines	Asia	South-Eastern Asia	13.9431	121.149	1985	2030	9	3	FULL	0	8	8	8	0	22.8688	0	22.8688	22.8688	22.8688	0	245.59	0	245.59	245.59	245.59	0	222.721	0	222.721	222.721	222.721	0	24.7468	0	24.7468	24.7468	0	88.8889	0	66238.8	0	66238.8	66238.8	915685	0	915685	915685
687	Liuhe	China	Asia	Eastern Asia	42.2774	125.737	1975	2030	11	1	FULL	0	0	2	0	2	11.9976	0	0	11.9976	0	11.9976	12.9974	0	0	12.9974	0	12.9974	0.999824	0	0	0.999824	0	0.999824	0.0908931	0	0	0.0908931	0	0	18.1818	92848.2	0	0	92848.2	72134.9	0	0	72134.9
688	Lodwar	Kenya	Africa	Eastern Africa	3.11687	35.6001	2010	2030	4	1	FULL	0	0	2	0	2	15.9139	0	0	15.9139	0	15.9139	19.8924	0	0	19.8924	0	19.8924	3.97851	0	0	3.97851	0	3.97851	0.994629	0	0	0.994629	0	0	50	54975.3	0	0	54975.3	72242.6	0	0	72242.6
690	Lombok Tengah	Indonesia	Asia	South-Eastern Asia	-8.63225	116.369	2025	2030	1	2	FULL	0	0	0	0	0	20.8517	0	20.8517	20.8517	20.8517	0	20.8517	0	20.8517	20.8517	20.8517	0	0	0	0	0	0	0	0	0	0	0	0	0	0	54602.1	0	54602.1	54602.1	54641.9	0	54641.9	54641.9
691	Longmen	China	Asia	Eastern Asia	20.6956	110.018	1995	2030	7	1	FULL	0	0	4	0	4	3.97772	0	0	3.97772	0	3.97772	7.95538	0	0	7.95538	0	7.95538	3.97766	0	0	3.97766	0	3.97766	0.568237	0	0	0.568237	0	0	57.1429	53443.5	0	0	53443.5	61822.6	0	0	61822.6
692	Loning	Indonesia	Asia	South-Eastern Asia	-6.8845	109.465	1975	2030	11	4	FULL	0	0	5	0	5	18.8823	0	0	18.8823	0	18.8823	15.8956	0	0	15.8956	0	15.8956	-2.98669	0	0	-2.98669	0	-2.98669	-0.271518	0	0	-0.271518	0	0	45.4545	107166	0	0	107166	77065.8	0	0	77065.8
694	Los Andes	Chile	South America	South America	-32.8358	-70.6017	2005	2030	5	1	PARTIAL	0	0	3	0	3	8.97284	0	0	5.6023	0	5.6023	14.9545	0	0	10.629	0	10.629	5.98164	0	0	5.02674	0	5.02674	1.19633	0	0	1.00535	0	0	60	51746.1	0	0	39302.8	88772.3	0	0	66723.4
695	Los Ãngeles	Chile	South America	South America	-37.4695	-72.3533	1995	2030	7	2	FULL	0	0	5	0	5	14.9819	0	0	14.9819	0	14.9819	28.9653	0	0	28.9653	0	28.9653	13.9834	0	0	13.9834	0	13.9834	1.99763	0	0	1.99763	0	0	71.4286	59837	0	0	59837	124414	0	0	124414
696	Los Cristianos	Spain	Europe	Southern Europe	28.0659	-16.7243	2005	2030	5	1	FULL	0	1	1	1	0	20.9198	0	20.9198	20.9198	20.9198	0	21.9162	0	21.9162	21.9162	21.9162	0	0.996374	0	0.996374	0.996374	0.996374	0	0.199275	0	0.199275	0.199275	0	20	0	55323.6	0	55323.6	55323.6	61154.6	0	61154.6	61154.6
697	Los Reyes Acozac	Mexico	North America	Central America	19.7698	-98.9836	2015	2030	3	4	FULL	0	0	0	0	0	20.8748	0	0	20.8748	0	20.8748	20.8748	0	0	20.8748	0	20.8748	0	0	0	0	0	0	0	0	0	0	0	0	0	62178.1	0	0	62178.1	65223.5	0	0	65223.5
698	Los Reyes de Salgado	Mexico	North America	Central America	19.5895	-102.469	2020	2030	2	1	FULL	0	0	0	0	0	9.95684	0	0	9.95684	0	9.95684	9.95684	0	0	9.95684	0	9.95684	0	0	0	0	0	0	0	0	0	0	0	0	0	53014.7	0	0	53014.7	57299.4	0	0	57299.4
699	Losari	Indonesia	Asia	South-Eastern Asia	-6.83858	108.818	1975	2030	11	5	FULL	0	0	6	0	6	27.835	0	0	27.835	0	27.835	43.7417	0	0	43.7417	0	43.7417	15.9067	0	0	15.9067	0	15.9067	1.44606	0	0	1.44606	0	0	54.5455	109481	0	0	109481	157266	0	0	157266
700	Lourdes	El Salvador	North America	Central America	13.7282	-89.37	1995	2030	7	22	FULL	3	3	3	2	0	15.918	13.6933	15.918	15.918	2.22468	0	25.8661	21.6512	25.8661	25.8661	4.21491	0	9.94818	7.95795	9.94818	9.94818	1.99023	0	1.42117	1.13685	1.42117	1.42117	42.8571	28.5714	0	54583.2	51054.9	54583.2	54583.2	140712	125377	140712	140712
701	Lowian	Indonesia	Asia	South-Eastern Asia	1.15252	124.829	2010	2030	4	6	FULL	1	1	1	0	0	18.8758	5.39736	18.8758	18.8758	13.4785	0	19.8701	6.39161	19.8701	19.8701	13.4785	0	0.994258	0.994255	0.994258	0.994258	0	0	0.248565	0.248564	0.248565	0.248565	25	0	0	56712.2	10461.1	56712.2	56712.2	70695.9	14581.8	70695.9	70695.9
702	Lubero	Dem. Rep. Congo	Africa	Middle Africa	-0.136592	29.3325	2025	2030	1	3	FULL	0	0	0	0	0	17.8951	0	0	17.8951	0	17.8951	17.8951	0	0	17.8951	0	17.8951	0	0	0	0	0	0	0	0	0	0	0	0	0	54358.5	0	0	54358.5	57527.3	0	0	57527.3
704	Lubuk Pakam	Indonesia	Asia	South-Eastern Asia	3.55946	98.8727	1975	2030	11	2	FULL	0	0	2	0	2	13.8959	0	0	13.8959	0	13.8959	15.8802	0	0	15.8802	0	15.8802	1.98424	0	0	1.98424	0	1.98424	0.180386	0	0	0.180386	0	0	18.1818	53358.7	0	0	53358.7	82119.3	0	0	82119.3
705	Lubuk Sikaping	Indonesia	Asia	South-Eastern Asia	0.135469	100.17	1975	2030	11	5	FULL	0	3	3	3	0	3.97189	0	3.97189	3.97189	3.97189	0	8.93632	0	8.93632	8.93632	8.93632	0	4.96443	0	4.96443	4.96443	4.96443	0	0.451312	0	0.451312	0.451312	0	27.2727	0	57657.6	0	57657.6	57657.6	57010.9	0	57010.9	57010.9
706	Lubuklinggau	Indonesia	Asia	South-Eastern Asia	-3.29354	102.862	1975	2030	11	2	FULL	0	0	3	0	3	13.915	0	0	13.915	0	13.915	32.7989	0	0	32.7989	0	32.7989	18.8839	0	0	18.8839	0	18.8839	1.71672	0	0	1.71672	0	0	27.2727	88030.1	0	0	88030.1	150407	0	0	150407
707	Lucena	Philippines	Asia	South-Eastern Asia	13.9412	121.616	1975	2030	11	3	FULL	0	7	7	7	0	14.9069	0	14.9069	14.9069	14.9069	0	53.6656	0	53.6656	53.6656	53.6656	0	38.7587	0	38.7587	38.7587	38.7587	0	3.52352	0	3.52352	3.52352	0	63.6364	0	67205.4	0	67205.4	67205.4	345767	0	345767	345767
708	Lumajang	Indonesia	Asia	South-Eastern Asia	-8.12156	113.221	1975	2030	11	9	FULL	0	1	1	1	0	19.8856	0	19.8856	19.8856	19.8856	0	16.9023	0	16.9023	16.9023	16.9023	0	-2.98328	0	-2.98328	-2.98328	-2.98328	0	-0.271207	0	-0.271207	-0.271207	0	9.09091	0	199577	0	199577	199577	109740	0	109740	109740
710	Luodong	Taiwan	Asia	Eastern Asia	24.6758	121.764	1975	2030	11	2	FULL	0	3	3	3	0	19.9023	0	19.9006	19.9023	19.9006	0	18.9071	0	18.9054	18.9071	18.9054	0	-0.995213	0	-0.995213	-0.995213	-0.995213	0	-0.0904739	0	-0.0904739	-0.0904739	0	27.2727	0	113234	0	113234	113234	67892.6	0	67891	67892.6
711	Lushui	China	Asia	Eastern Asia	25.8357	98.856	1990	2030	8	1	FULL	0	0	0	0	0	8.9553	0	0	8.9553	0	8.9553	8.9553	0	0	8.9553	0	8.9553	0	0	0	0	0	0	0	0	0	0	0	0	0	52243.2	0	0	52243.2	52205.3	0	0	52205.3
712	Luxembourg	Luxembourg	Europe	Western Europe	49.6139	6.13278	1975	2030	11	1	FULL	0	0	6	0	6	21.0277	0	0	21.0277	0	21.0277	40.0537	0	0	40.0537	0	40.0537	19.026	0	0	19.026	0	19.026	1.72964	0	0	1.72964	0	0	54.5455	68165.6	0	0	68165.6	170118	0	0	170118
713	Ma`bar	Yemen	Asia	Western Asia	14.7935	44.2924	1995	2030	7	2	FULL	0	0	3	0	3	5.96112	0	0	5.96112	0	5.96112	9.93526	0	0	9.93526	0	9.93526	3.97414	0	0	3.97414	0	3.97414	0.567734	0	0	0.567734	0	0	42.8571	53203.6	0	0	53203.6	108194	0	0	108194
714	Madang	Papua New Guinea	Oceania	Melanesia	-5.22499	145.796	1995	2030	7	1	FULL	0	0	4	0	4	14.896	0	0	14.896	0	14.896	23.8332	0	0	23.8332	0	23.8332	8.93723	0	0	8.93723	0	8.93723	1.27675	0	0	1.27675	0	0	57.1429	53165.8	0	0	53165.8	90208.4	0	0	90208.4
715	Madinat ash Sharq	Yemen	Asia	Western Asia	14.6351	43.9551	2015	2030	3	1	FULL	0	0	3	0	3	1.98734	0	0	1.98734	0	1.98734	5.96198	0	0	5.96198	0	5.96198	3.97464	0	0	3.97464	0	3.97464	1.32488	0	0	1.32488	0	0	100	50469.7	0	0	50469.7	70411.4	0	0	70411.4
716	Madinat Lab'us	Yemen	Asia	Western Asia	13.8515	45.2405	2010	2030	4	2	PARTIAL	0	0	3	0	3	12.9123	0	0	10.2515	0	10.2515	21.8523	0	0	15.446	0	15.446	8.94002	0	0	5.19451	0	5.19451	2.23501	0	0	1.29863	0	0	75	70104.6	0	0	48495.9	104898	0	0	69021.2
717	Madiun	Indonesia	Asia	South-Eastern Asia	-7.61497	111.499	1975	2030	11	3	FULL	0	1	2	1	1	90.3467	0	31.1679	90.3467	31.1679	59.1788	94.3235	0	31.168	94.3235	31.168	63.1555	3.97677	0	0	3.97677	0	3.97675	0.361524	0	0	0.361524	0	9.09091	9.09091	360137	0	110899	360137	396487	0	104915	396487
718	Mafuo	Dem. Rep. Congo	Africa	Middle Africa	-2.09547	28.5831	2005	2030	5	1	FULL	0	0	0	0	0	6.95307	0	0	6.95307	0	6.95307	6.95307	0	0	6.95307	0	6.95307	0	0	0	0	0	0	0	0	0	0	0	0	0	50837.4	0	0	50837.4	83987.6	0	0	83987.6
719	Magelang	Indonesia	Asia	South-Eastern Asia	-7.48807	110.22	1975	2030	11	5	FULL	0	6	6	6	0	36.7385	0	36.7385	36.7385	36.7385	0	64.5432	0	64.5432	64.5432	64.5432	0	27.8047	0	27.8047	27.8047	27.8047	0	2.5277	0	2.5277	2.5277	0	54.5455	0	426341	0	426341	426341	368179	0	368179	368179
721	Magway	Myanmar	Asia	South-Eastern Asia	20.1496	94.9338	1985	2030	9	1	FULL	0	0	4	0	4	13.9309	0	0	13.9309	0	13.9309	26.8678	0	0	26.8678	0	26.8678	12.9368	0	0	12.9368	0	12.9368	1.43742	0	0	1.43742	0	0	44.4444	58402.1	0	0	58402.1	123432	0	0	123432
723	Majalengka	Indonesia	Asia	South-Eastern Asia	-6.83626	108.238	1975	2030	11	9	FULL	0	5	5	5	0	7.96	0	7.96	7.96	7.96	0	18.9052	0	18.9052	18.9052	18.9052	0	10.9452	0	10.9452	10.9452	10.9452	0	0.995017	0	0.995017	0.995017	0	45.4545	0	51449.7	0	51449.7	51449.7	100381	0	100381	100381
724	Majenang	Indonesia	Asia	South-Eastern Asia	-7.29942	108.757	1975	2030	11	5	FULL	0	0	4	0	4	9.94232	0	0	9.94232	0	9.94232	29.8268	0	0	29.8268	0	29.8268	19.8845	0	0	19.8845	0	19.8845	1.80768	0	0	1.80768	0	0	36.3636	103396	0	0	103396	100215	0	0	100215
726	Malabo	Eq. Guinea	Africa	Middle Africa	3.7525	8.77909	1995	2030	7	4	FULL	0	5	5	5	0	19.8517	0	19.8517	19.8517	19.8517	0	70.4736	0	70.4736	70.4736	70.4736	0	50.6218	0	50.6218	50.6218	50.6218	0	7.23169	0	7.23169	7.23169	0	71.4286	0	66909.3	0	66909.3	66909.3	845088	0	845088	845088
727	MalacatÃ¡n	Guatemala	North America	Central America	14.9107	-92.0578	2015	2030	3	6	FULL	0	2	2	2	0	6.95548	0	6.95548	6.95548	6.95548	0	8.94286	0	8.94286	8.94286	8.94286	0	1.98738	0	1.98738	1.98738	1.98738	0	0.662459	0	0.662459	0.662459	0	66.6667	0	54149.6	0	54149.6	54149.6	65027.6	0	65027.6	65027.6
728	Malang	Indonesia	Asia	South-Eastern Asia	-7.93017	112.631	1975	2030	11	9	FULL	3	8	8	8	0	226.538	6.60866	226.538	226.538	219.93	0	318.935	9.70718	318.935	318.935	309.228	0	92.3972	3.09852	92.3972	92.3972	89.2987	0	8.39974	0.281684	8.39974	8.39974	27.2727	72.7273	0	1.17465e+06	37966.5	1.17465e+06	1.17465e+06	1.91907e+06	53945.2	1.91907e+06	1.91907e+06
731	Mamoudzou	Mayotte	Europe	Western Europe	-12.7622	45.2226	2005	2030	5	1	FULL	1	2	2	1	0	20.8566	9.57225	20.8566	20.8566	11.2844	0	27.8084	14.5089	27.8084	27.8084	13.2995	0	6.95177	4.93666	6.95177	6.95177	2.01511	0	1.39035	0.987332	1.39035	1.39035	20	20	0	57826.3	39564.7	57826.3	57826.3	149387	81683.2	149387	149387
732	Manado	Indonesia	Asia	South-Eastern Asia	1.48002	124.848	1975	2030	11	7	FULL	7	9	9	7	0	44.7092	0	44.7092	44.7092	44.7092	0	94.386	18.5409	94.386	94.386	75.8451	0	49.6768	18.5409	49.6768	49.6768	31.1359	0	4.51607	1.68554	4.51607	4.51607	63.6364	63.6364	0	192146	0	192146	192146	522352	57227.9	522352	522352
733	Managua	Nicaragua	North America	Central America	12.1339	-86.2506	1975	2030	11	12	FULL	9	11	11	10	0	99.3287	65.2338	99.3287	99.3287	34.0949	0	219.512	145.92	219.512	219.512	73.5919	0	120.183	80.686	120.183	120.183	39.4969	0	10.9257	7.33509	10.9257	10.9257	81.8182	90.9091	0	431881	289161	431881	431881	1.56385e+06	1.01845e+06	1.56385e+06	1.56385e+06
734	Manakhah	Yemen	Asia	Western Asia	15.0734	43.7401	2005	2030	5	1	FULL	0	0	0	0	0	1.98772	0	0	1.98772	0	1.98772	1.98772	0	0	1.98772	0	1.98772	0	0	0	0	0	0	0	0	0	0	0	0	0	51438.7	0	0	51438.7	76559.5	0	0	76559.5
735	Manazil Baradan	Yemen	Asia	Western Asia	13.898	44.1648	2015	2030	3	1	FULL	0	0	2	0	2	10.9283	0	0	10.9283	0	10.9283	17.8829	0	0	17.8829	0	17.8829	6.95466	0	0	6.95466	0	6.95466	2.31822	0	0	2.31822	0	0	66.6667	56026.2	0	0	56026.2	169980	0	0	169980
736	Mandiraja	Indonesia	Asia	South-Eastern Asia	-7.46629	109.435	1975	2030	11	6	FULL	0	0	7	0	7	8.94103	0	0	8.94103	0	8.94103	67.5515	0	0	67.5515	0	67.5515	58.6105	0	0	58.6105	0	58.6105	5.32822	0	0	5.32822	0	0	63.6364	63571.6	0	0	63571.6	192972	0	0	192972
738	Manila	Philippines	Asia	South-Eastern Asia	14.5999	120.988	1975	2030	11	4	FULL	6	11	11	11	11	1138.73	0	72.2546	1138.73	72.2546	1066.47	2598.74	60.5406	299.161	2598.74	238.62	2299.58	1460.02	60.5406	226.906	1460.02	166.365	1233.11	132.729	5.50369	20.6278	132.729	54.5455	100	100	8456581	0	176369	8456581	27511716	285322	1.94202e+06	27511716
739	Manisa	Turkey	Asia	Western Asia	38.6182	27.4066	1975	2030	11	1	PARTIAL	0	0	7	0	7	15.9632	0	0	13.3676	0	13.3676	53.8599	0	0	28.8093	0	28.8093	37.8967	0	0	15.4418	0	15.4418	3.44516	0	0	1.4038	0	0	63.6364	84180.1	0	0	79656.4	429647	0	0	327129
740	Manizales	Colombia	South America	South America	5.06111	-75.5025	1975	2030	11	6	FULL	0	8	8	8	0	30.7741	0	30.7741	30.7741	30.7741	0	54.5992	0	54.5992	54.5992	54.5992	0	23.8251	0	23.8251	23.8251	23.8251	0	2.16592	0	2.16592	2.16592	0	72.7273	0	239445	0	239445	239445	434911	0	434911	434911
741	Manna	Indonesia	Asia	South-Eastern Asia	-4.45669	102.912	1975	2030	11	2	FULL	0	0	2	0	2	11.9267	0	0	11.9267	0	11.9267	14.9091	0	0	14.9091	0	14.9091	2.98234	0	0	2.98234	0	2.98234	0.271122	0	0	0.271122	0	0	18.1818	64871.3	0	0	64871.3	73863	0	0	73863
742	Manresa	Spain	Europe	Southern Europe	41.7269	1.83204	1985	2030	9	1	FULL	0	0	2	0	2	6.99053	0	0	6.99053	0	6.99053	10.9854	0	0	10.9854	0	10.9854	3.9949	0	0	3.9949	0	3.9949	0.443878	0	0	0.443878	0	0	22.2222	50236.5	0	0	50236.5	61393.1	0	0	61393.1
743	Manzanillo	Mexico	North America	Central America	19.0908	-104.316	2000	2030	6	1	FULL	0	0	5	0	5	37.7737	0	0	37.7737	0	37.7737	55.6679	0	0	55.6679	0	55.6679	17.8942	0	0	17.8942	0	17.8942	2.98237	0	0	2.98237	0	0	83.3333	84776.9	0	0	84776.9	184779	0	0	184779
744	Maple Ridge	Canada	North America	Northern America	49.22	-122.625	2005	2030	5	3	FULL	0	0	5	0	5	22.0045	0	0	22.0045	0	22.0045	59.0228	0	0	59.0228	0	59.0228	37.0183	0	0	37.0183	0	37.0183	7.40366	0	0	7.40366	0	0	100	52436.4	0	0	52436.4	122326	0	0	122326
745	Marawi	Philippines	Asia	South-Eastern Asia	7.99596	124.328	1975	2030	11	3	FULL	0	0	2	0	2	97.342	0	0	97.342	0	97.342	31.7829	0	0	31.7829	0	31.7829	-65.5591	0	0	-65.5591	0	-65.5591	-5.95992	0	0	-5.95992	0	0	18.1818	353249	0	0	353249	89413	0	0	89413
746	Mardin	Turkey	Asia	Western Asia	37.3192	40.7332	2015	2030	3	1	FULL	0	0	2	0	2	9.9801	0	0	9.9801	0	9.9801	15.9676	0	0	15.9676	0	15.9676	5.9875	0	0	5.9875	0	5.9875	1.99583	0	0	1.99583	0	0	66.6667	56424.5	0	0	56424.5	88043.3	0	0	88043.3
748	Mariscal Nieto	Peru	South America	South America	-17.1982	-70.9365	2025	2030	1	5	FULL	0	0	0	0	0	9.94739	0	0	9.94739	0	9.94739	9.94739	0	0	9.94739	0	9.94739	0	0	0	0	0	0	0	0	0	0	0	0	0	50499.7	0	0	50499.7	52897.7	0	0	52897.7
749	Mariveles	Philippines	Asia	South-Eastern Asia	14.4392	120.494	2015	2030	3	3	FULL	0	0	0	0	0	11.9419	0	0	11.9419	0	11.9419	11.9419	0	0	11.9419	0	11.9419	0	0	0	0	0	0	0	0	0	0	0	0	0	50943.3	0	0	50943.3	59012.1	0	0	59012.1
750	MartÃ­nez de la Torre	Mexico	North America	Central America	20.0676	-97.0531	1975	2030	11	6	FULL	0	0	6	0	6	11.9415	0	0	11.9415	0	11.9415	22.8876	0	0	22.8876	0	22.8876	10.9461	0	0	10.9461	0	10.9461	0.995103	0	0	0.995103	0	0	54.5455	50566.7	0	0	50566.7	94754.2	0	0	94754.2
751	Masaya	Nicaragua	North America	Central America	11.9755	-86.0941	1975	2030	11	10	FULL	2	3	3	1	0	12.9134	12.0014	12.9134	12.9134	0.911935	0	20.8597	18.889	20.8597	20.8597	1.97073	0	7.94633	6.88754	7.94633	7.94633	1.05879	0	0.722394	0.62614	0.722394	0.722394	18.1818	9.09091	0	67072.6	66315.4	67072.6	67072.6	173800	166649	173800	173800
752	Masbate City	Philippines	Asia	South-Eastern Asia	12.3603	123.628	2010	2030	4	2	FULL	0	0	2	0	2	20.8578	0	0	20.8578	0	20.8578	26.8179	0	0	26.8179	0	26.8179	5.96011	0	0	5.96011	0	5.96011	1.49003	0	0	1.49003	0	0	50	64066	0	0	64066	108341	0	0	108341
753	Masisi	Dem. Rep. Congo	Africa	Middle Africa	-1.39922	28.8211	2010	2030	4	6	FULL	0	0	0	0	0	3.97411	0	0	3.97411	0	3.97411	3.97411	0	0	3.97411	0	3.97411	0	0	0	0	0	0	0	0	0	0	0	0	0	56386	0	0	56386	75169.7	0	0	75169.7
754	Massawa	Eritrea	Africa	Eastern Africa	15.6131	39.4634	1985	2030	9	1	PARTIAL	0	0	4	0	4	14.9032	0	0	14.9032	0	14.9032	42.722	0	0	42.5123	0	42.5123	27.8188	0	0	27.6092	0	27.6092	3.09098	0	0	3.06768	0	0	44.4444	58441.7	0	0	58441.7	388682	0	0	388670
755	Matagalpa	Nicaragua	North America	Central America	12.9275	-85.9175	1975	2030	11	5	FULL	0	0	6	0	6	6.95469	0	0	6.95469	0	6.95469	16.8896	0	0	16.8896	0	16.8896	9.93489	0	0	9.93489	0	9.93489	0.903172	0	0	0.903172	0	0	54.5455	54059.5	0	0	54059.5	141951	0	0	141951
756	Mataram	Indonesia	Asia	South-Eastern Asia	-8.57321	116.101	1975	2030	11	3	FULL	0	0	9	0	9	62.5512	0	0	62.5512	0	62.5512	193.619	0	0	193.619	0	193.619	131.068	0	0	131.068	0	131.068	11.9152	0	0	11.9152	0	0	81.8182	202505	0	0	202505	1.05689e+06	0	0	1.05689e+06
757	MatarÃ³	Spain	Europe	Southern Europe	41.538	2.43573	1975	2030	11	1	FULL	0	0	3	0	3	12.9797	0	0	12.9797	0	12.9797	17.9724	0	0	17.9724	0	17.9724	4.99272	0	0	4.99272	0	4.99272	0.453883	0	0	0.453883	0	0	27.2727	87291.8	0	0	87291.8	141273	0	0	141273
758	Mati	Philippines	Asia	South-Eastern Asia	6.96535	126.212	2005	2030	5	1	FULL	0	0	3	0	3	11.941	0	0	11.941	0	11.941	16.9159	0	0	16.9159	0	16.9159	4.97496	0	0	4.97496	0	4.97496	0.994993	0	0	0.994993	0	0	60	51346.6	0	0	51346.6	84084.9	0	0	84084.9
759	Matsue	Japan	Asia	Eastern Asia	35.4608	133.061	1975	2030	11	1	FULL	0	0	5	0	5	26.9388	0	0	26.9388	0	26.9388	35.918	0	0	35.918	0	35.918	8.97927	0	0	8.97927	0	8.97927	0.816297	0	0	0.816297	0	0	45.4545	51504.7	0	0	51504.7	100050	0	0	100050
761	Matsumoto	Japan	Asia	Eastern Asia	36.2281	137.967	1975	2030	11	12	FULL	0	0	3	0	3	22.9749	0	0	22.9749	0	22.9749	64.9292	0	0	64.9292	0	64.9292	41.9544	0	0	41.9544	0	41.9544	3.81403	0	0	3.81403	0	0	27.2727	58305.4	0	0	58305.4	169347	0	0	169347
762	Maui	United States of America	North America	Northern America	20.8918	-156.484	2025	2030	1	1	FULL	0	0	1	0	1	24.8969	0	5.05046	24.8969	5.05046	19.8464	26.8884	0	5.05046	26.8884	5.05046	21.8379	1.99147	0	0	1.99147	0	1.99147	1.99147	0	0	1.99147	0	0	100	51667.9	0	11748.1	51667.9	60205.6	0	13283	60205.6
763	Maumere	Indonesia	Asia	South-Eastern Asia	-8.61748	122.213	1975	2030	11	6	FULL	0	3	5	3	3	14.8948	0	14.7569	14.8948	14.7569	0	21.8445	0	19.2746	21.8445	19.2746	2.56993	6.94966	0	4.51768	6.94966	4.51768	2.56993	0.631787	0	0.410699	0.631787	0	27.2727	27.2727	102769	0	102754	102769	165663	0	161639	165663
764	Mawza`	Yemen	Asia	Western Asia	13.2675	43.5069	1985	2030	9	1	FULL	0	0	2	0	2	2.98157	0	0	2.98157	0	2.98157	4.9693	0	0	4.9693	0	4.9693	1.98774	0	0	1.98774	0	1.98774	0.22086	0	0	0.22086	0	0	22.2222	51271.1	0	0	51271.1	142602	0	0	142602
765	Maychew	Ethiopia	Africa	Eastern Africa	12.7849	39.54	2010	2030	4	2	FULL	0	0	1	0	1	7.94618	0	0	7.94618	0	7.94618	8.93922	0	0	8.93922	0	8.93922	0.993042	0	0	0.993042	0	0.993042	0.24826	0	0	0.24826	0	0	25	50843.6	0	0	50843.6	59419	0	0	59419
766	Mazatenango	Guatemala	North America	Central America	14.5335	-91.5043	1990	2030	8	10	FULL	0	4	4	4	0	9.94036	0	9.94036	9.94036	9.94036	0	18.8858	0	18.8858	18.8858	18.8858	0	8.94541	0	8.94541	8.94541	8.94541	0	1.11818	0	1.11818	1.11818	0	50	0	50784	0	50784	50784	119119	0	119119	119119
767	Mbalizi	Tanzania	Africa	Eastern Africa	-8.93678	33.3556	2005	2030	5	3	FULL	0	3	3	3	0	12.9068	0	12.9068	12.9068	12.9068	0	18.8647	0	18.8647	18.8647	18.8647	0	5.9579	0	5.9579	5.9579	5.9579	0	1.19158	0	1.19158	1.19158	0	60	0	53039.9	0	53039.9	53039.9	90990.6	0	90990.6	90990.6
768	Mbarara	Uganda	Africa	Eastern Africa	-0.610976	30.6639	1995	2030	7	3	FULL	0	0	6	0	6	22.8661	0	0	22.8661	0	22.8661	48.7149	0	0	48.7149	0	48.7149	25.8489	0	0	25.8489	0	25.8489	3.69269	0	0	3.69269	0	0	85.7143	64751.1	0	0	64751.1	371905	0	0	371905
769	Mbeya	Tanzania	Africa	Eastern Africa	-8.9095	33.4527	1980	2030	10	3	FULL	7	10	10	10	0	33.7586	0	33.7586	33.7586	33.7586	0	107.234	18.1776	107.234	107.234	89.0563	0	73.4753	18.1776	73.4753	73.4753	55.2977	0	7.34753	1.81776	7.34753	7.34753	70	100	0	76273.2	0	76273.2	76273.2	682781	72306.2	682781	682781
770	Mbouda	Cameroon	Africa	Middle Africa	5.62372	10.2552	1975	2030	11	1	FULL	0	0	1	0	1	11.9173	0	0	11.9173	0	11.9173	12.9104	0	0	12.9104	0	12.9104	0.993119	0	0	0.993119	0	0.993119	0.0902835	0	0	0.0902835	0	0	9.09091	68575.8	0	0	68575.8	66184	0	0	66184
772	Mechara	Ethiopia	Africa	Eastern Africa	8.60286	40.323	1995	2030	7	5	FULL	0	0	3	0	3	2.98003	0	0	2.98003	0	2.98003	10.9265	0	0	10.9265	0	10.9265	7.94649	0	0	7.94649	0	7.94649	1.13521	0	0	1.13521	0	0	42.8571	59697.6	0	0	59697.6	59465.1	0	0	59465.1
773	Medan	Indonesia	Asia	South-Eastern Asia	3.59093	98.6657	1975	2030	11	3	FULL	0	1	10	1	10	365.276	0	0	365.276	0	365.276	604.496	0	1.14482	604.496	1.14482	603.351	239.221	0	1.14482	239.221	1.14482	238.076	21.7473	0	0.104075	21.7473	0	9.09091	90.9091	1.68777e+06	0	0	1.68777e+06	4.56079e+06	0	1056.2	4.56079e+06
774	Medford	United States of America	North America	Northern America	42.3428	-122.875	1995	2030	7	1	FULL	0	0	2	0	2	42.9375	0	0	42.9375	0	42.9375	46.9306	0	0	46.9306	0	46.9306	3.99307	0	0	3.99307	0	3.99307	0.570439	0	0	0.570439	0	0	28.5714	58125	0	0	58125	91458.6	0	0	91458.6
775	Mehal Meda	Ethiopia	Africa	Eastern Africa	10.3089	39.6589	1980	2030	10	1	FULL	0	0	1	0	1	3.97226	0	0	3.97226	0	3.97226	4.9654	0	0	4.9654	0	4.9654	0.99314	0	0	0.99314	0	0.99314	0.099314	0	0	0.099314	0	0	10	51786.7	0	0	51786.7	61305.7	0	0	61305.7
776	Meihekou	China	Asia	Eastern Asia	42.5324	125.678	1975	2030	11	1	FULL	0	0	6	0	6	19.996	0	0	19.996	0	19.996	32.9941	0	0	32.9941	0	32.9941	12.9981	0	0	12.9981	0	12.9981	1.18165	0	0	1.18165	0	0	54.5455	163419	0	0	163419	214449	0	0	214449
777	Meiktila	Myanmar	Asia	South-Eastern Asia	20.8856	95.8624	1985	2030	9	1	FULL	0	0	4	0	4	19.9275	0	0	19.9275	0	19.9275	26.9022	0	0	26.9022	0	26.9022	6.97474	0	0	6.97474	0	6.97474	0.774971	0	0	0.774971	0	0	44.4444	63192.9	0	0	63192.9	134236	0	0	134236
779	Mek'ele	Ethiopia	Africa	Eastern Africa	13.4959	39.4677	1990	2030	8	1	PARTIAL	0	0	7	0	7	21.852	0	0	21.852	0	21.852	73.5045	0	0	72.0297	0	72.0297	51.6525	0	0	50.1777	0	50.1777	6.45656	0	0	6.27221	0	0	87.5	55590.1	0	0	55590.1	483753	0	0	481140
780	Mekarsari	Indonesia	Asia	South-Eastern Asia	-7.04633	108.009	1995	2030	7	9	FULL	0	6	6	6	0	19.9083	0	19.9083	19.9083	19.9083	0	60.7193	0	60.7193	60.7193	60.7193	0	40.811	0	40.811	40.811	40.811	0	5.83014	0	5.83014	5.83014	0	85.7143	0	70106.9	0	70106.9	70106.9	147458	0	147458	147458
781	Meki	Ethiopia	Africa	Eastern Africa	8.15079	38.8215	1980	2030	10	10	FULL	0	3	3	3	3	6.94951	0	4.85464	6.94951	4.85464	2.09488	15.8846	0	9.12164	15.8846	9.12164	6.76294	8.93507	0	4.26701	8.93507	4.26701	4.66806	0.893507	0	0.426701	0.893507	0	30	30	53102	0	39532.5	53102	139810	0	88380	139810
782	Mekoni	Ethiopia	Africa	Eastern Africa	12.7992	39.644	1990	2030	8	4	FULL	0	0	0	0	0	5.9597	0	0	5.9597	0	5.9597	5.9597	0	0	5.9597	0	5.9597	0	0	0	0	0	0	0	0	0	0	0	0	0	55744.6	0	0	55744.6	58961.7	0	0	58961.7
783	Mellit	Sudan	Africa	Northern Africa	14.1332	25.5464	1985	2030	9	1	FULL	0	0	7	0	7	9.93899	0	0	9.93899	0	9.93899	22.8599	0	0	22.8599	0	22.8599	12.921	0	0	12.921	0	12.921	1.43566	0	0	1.43566	0	0	77.7778	51264.1	0	0	51264.1	241812	0	0	241812
784	Mendoza	Argentina	South America	South America	-32.9056	-68.8291	1975	2030	11	1	PARTIAL	0	0	2	0	2	139.504	0	0	4.76742	0	4.76742	215.234	0	0	8.7323	0	8.7323	75.7308	0	0	3.96489	0	3.96489	6.88462	0	0	0.360444	0	0	18.1818	468066	0	0	7607.26	1.1092e+06	0	0	20247.1
785	Mersa	Ethiopia	Africa	Eastern Africa	11.665	39.6604	1975	2030	11	2	FULL	0	0	1	0	1	7.94546	0	0	7.94546	0	7.94546	8.93848	0	0	8.93848	0	8.93848	0.993024	0	0	0.993024	0	0.993024	0.0902749	0	0	0.0902749	0	0	9.09091	60740.5	0	0	60740.5	77842.6	0	0	77842.6
786	Meru	Kenya	Africa	Eastern Africa	0.0520942	37.6476	2005	2030	5	1	FULL	0	1	2	1	1	16.8821	0	0.638835	16.8821	0.638835	16.2432	19.8613	0	2.20321	19.8613	2.20321	17.6581	2.97923	0	1.56438	2.97923	1.56438	1.41485	0.595845	0	0.312875	0.595845	0	20	20	57907	0	1004.61	57907	136661	0	3331.5	136661
787	Messina	Italy	Europe	Southern Europe	38.1886	15.5449	1975	2030	11	5	FULL	0	0	2	0	2	44.8951	0	0	44.8951	0	44.8951	44.8951	0	0	44.8951	0	44.8951	0	0	0	0	0	0	0	0	0	0	0	0	18.1818	197008	0	0	197008	178767	0	0	178767
788	Metro	Indonesia	Asia	South-Eastern Asia	-5.12192	105.314	1975	2030	11	1	FULL	0	0	7	0	7	20.8457	0	0	20.8457	0	20.8457	66.5067	0	0	66.5067	0	66.5067	45.661	0	0	45.661	0	45.661	4.151	0	0	4.151	0	0	63.6364	78824.6	0	0	78824.6	198928	0	0	198928
789	Meulaboh	Indonesia	Asia	South-Eastern Asia	4.14362	96.128	1975	2030	11	2	FULL	0	0	4	0	4	11.9413	0	0	11.9413	0	11.9413	14.9267	0	0	14.9267	0	14.9267	2.98543	0	0	2.98543	0	2.98543	0.271402	0	0	0.271402	0	0	36.3636	102871	0	0	102871	51203.8	0	0	51203.8
790	Mexicali	Mexico	North America	Central America	32.6232	-115.456	1975	2030	11	2	FULL	0	6	6	6	2	104.689	0	80.3772	104.689	80.3772	24.3121	165.498	0	138.658	165.498	138.658	26.8402	60.8088	0	58.2806	60.8088	58.2806	2.52813	5.52807	0	5.29824	5.52807	0	54.5455	18.1818	202018	0	158148	202018	765231	0	629866	765231
791	Mexico City	Mexico	North America	Central America	19.4513	-99.1164	1975	2030	11	7	FULL	1	8	11	8	11	1685.82	1.48696	597.783	1685.82	596.296	1088.03	2128.14	2.25864	729.987	2128.14	727.729	1398.16	442.327	0.771675	132.204	442.327	131.432	310.123	40.2115	0.0701523	12.0185	40.2115	9.09091	72.7273	100	11138410	2331.25	4294760	11138410	18059360	2242.56	5866919	18059360
792	Miaoli	Taiwan	Asia	Eastern Asia	24.5521	120.826	1975	2030	11	1	PARTIAL	0	0	0	0	0	19.9201	0	0	6.51403	0	6.51403	16.9324	0	0	6.57802	0	6.57802	-2.98766	0	0	0	0	0	-0.271605	0	0	0	0	0	0	104772	0	0	38586.2	71594.7	0	0	25478.2
793	Midsayap	Philippines	Asia	South-Eastern Asia	7.20045	124.524	2020	2030	2	3	FULL	0	0	2	0	2	19.8681	0	0	19.8681	0	19.8681	27.8154	0	0	27.8154	0	27.8154	7.94731	0	0	7.94731	0	7.94731	3.97365	0	0	3.97365	0	0	100	72304.9	0	0	72304.9	113524	0	0	113524
794	Migori	Kenya	Africa	Eastern Africa	-1.0676	34.4694	2010	2030	4	1	FULL	0	0	3	0	3	15.8909	0	0	15.8909	0	15.8909	18.8703	0	0	18.8703	0	18.8703	2.97939	0	0	2.97939	0	2.97939	0.744848	0	0	0.744848	0	0	75	52158.8	0	0	52158.8	89054.7	0	0	89054.7
796	Milas	Turkey	Asia	Western Asia	37.3095	27.7828	2020	2030	2	1	PARTIAL	0	0	0	0	0	9.97529	0	0	9.97131	0	9.97131	9.97529	0	0	9.97131	0	9.97131	0	0	0	0	0	0	0	0	0	0	0	0	0	55948.9	0	0	55947.3	62069.8	0	0	62068
797	MinatitlÃ¡n	Mexico	North America	Central America	17.995	-94.5579	1985	2030	9	1	FULL	0	0	2	0	2	34.8052	0	0	34.8052	0	34.8052	38.781	0	0	38.781	0	38.781	3.97577	0	0	3.97577	0	3.97577	0.441752	0	0	0.441752	0	0	22.2222	80818.1	0	0	80818.1	174512	0	0	174512
805	Misraq Shewa	Ethiopia	Africa	Eastern Africa	8.29965	38.9477	2005	2030	5	10	FULL	0	1	1	1	0	2.97838	0	2.97838	2.97838	2.97838	0	4.96397	0	4.96397	4.96397	4.96397	0	1.98559	0	1.98559	1.98559	1.98559	0	0.397119	0	0.397119	0.397119	0	20	0	51179.4	0	51179.4	51179.4	50005.4	0	50005.4	50005.4
810	Mito	Japan	Asia	Eastern Asia	36.3705	140.453	1975	2030	11	4	FULL	0	0	7	0	7	40.888	0	0	40.888	0	40.888	65.8199	0	0	65.8199	0	65.8199	24.9319	0	0	24.9319	0	24.9319	2.26653	0	0	2.26653	0	0	63.6364	82863.9	0	0	82863.9	169919	0	0	169919
811	Mixquiahuala	Mexico	North America	Central America	20.2351	-99.2082	2020	2030	2	1	FULL	0	0	1	0	1	14.9112	0	0	14.9112	0	14.9112	15.9049	0	0	15.9049	0	15.9049	0.993786	0	0	0.993786	0	0.993786	0.496893	0	0	0.496893	0	0	50	54216.9	0	0	54216.9	63317.7	0	0	63317.7
812	Miyakonojo	Japan	Asia	Eastern Asia	31.7337	131.076	1975	2030	11	4	FULL	0	2	3	2	2	35.8968	0	18.4071	35.8968	18.4071	17.4898	40.8827	0	20.7659	40.8827	20.7659	20.1168	4.98585	0	2.35884	4.98585	2.35884	2.62701	0.453259	0	0.21444	0.453259	0	18.1818	18.1818	117959	0	55742.2	117959	92672.9	0	45214.3	92672.9
813	Miyazaki	Japan	Asia	Eastern Asia	31.9135	131.42	1975	2030	11	3	FULL	0	0	6	0	6	39.9008	0	0	39.9008	0	39.9008	56.8586	0	0	56.8586	0	56.8586	16.9578	0	0	16.9578	0	16.9578	1.54162	0	0	1.54162	0	0	54.5455	86937.1	0	0	86937.1	179189	0	0	179189
814	Mojo	Ethiopia	Africa	Eastern Africa	8.59203	39.1267	1990	2030	8	11	FULL	0	4	4	4	0	8.93512	0	8.93512	8.93512	8.93512	0	15.8849	0	15.8849	15.8849	15.8849	0	6.94976	0	6.94976	6.94976	6.94976	0	0.86872	0	0.86872	0.86872	0	50	0	50000.2	0	50000.2	50000.2	115482	0	115482	115482
815	Mojoagung	Indonesia	Asia	South-Eastern Asia	-7.56398	112.364	1990	2030	8	7	FULL	0	1	2	1	1	16.8862	0	11.7632	16.8862	11.7632	5.12301	22.8459	0	16.6233	22.8459	16.6233	6.22261	5.95969	0	4.86008	5.95969	4.86008	1.09961	0.744961	0	0.60751	0.744961	0	12.5	12.5	55391.2	0	29227.2	55391.2	68412.7	0	40896.7	68412.7
817	Momostenango	Guatemala	North America	Central America	15.0274	-91.4103	2015	2030	3	9	FULL	0	2	2	2	0	12.9234	0	11.1809	12.9234	11.1809	1.74244	15.9057	0	14.1632	15.9057	14.1632	1.74244	2.98228	0	2.98228	2.98228	2.98228	0	0.994094	0	0.994094	0.994094	0	66.6667	0	51059.6	0	38700.5	51059.6	66779.7	0	52173	66779.7
818	Morelia	Mexico	North America	Central America	19.6998	-101.196	1975	2030	11	2	FULL	0	0	7	0	7	61.7106	0	0	61.7106	0	61.7106	109.486	0	0	109.486	0	109.486	47.7751	0	0	47.7751	0	47.7751	4.34319	0	0	4.34319	0	0	63.6364	157508	0	0	157508	653314	0	0	653314
819	Morioka	Japan	Asia	Eastern Asia	39.7168	141.135	1975	2030	11	6	FULL	0	5	5	5	0	58.8809	0	58.8809	58.8809	58.8809	0	64.8681	0	64.8681	64.8681	64.8681	0	5.98723	0	5.98723	5.98723	5.98723	0	0.544293	0	0.544293	0.544293	0	45.4545	0	181589	0	181589	181589	198779	0	198779	198779
820	Moroni	Comoros	Africa	Eastern Africa	-11.6951	43.2557	1985	2030	9	2	FULL	0	7	7	7	0	15.9033	0	15.9033	15.9033	15.9033	0	40.7517	0	40.7517	40.7517	40.7517	0	24.8483	0	24.8483	24.8483	24.8483	0	2.76093	0	2.76093	2.76093	0	77.7778	0	51878.4	0	51878.4	51878.4	196595	0	196595	196595
821	Morsito	Ethiopia	Africa	Eastern Africa	7.6908	37.7245	2000	2030	6	4	FULL	0	0	2	0	2	2.97967	0	0	2.97967	0	2.97967	5.95943	0	0	5.95943	0	5.95943	2.97976	0	0	2.97976	0	2.97976	0.496626	0	0	0.496626	0	0	33.3333	57407.4	0	0	57407.4	53477	0	0	53477
822	Moshi	Tanzania	Africa	Eastern Africa	-3.36027	37.341	1980	2030	10	2	FULL	0	0	10	0	10	17.881	0	0	17.881	0	17.881	67.5504	0	0	67.5504	0	67.5504	49.6693	0	0	49.6693	0	49.6693	4.96693	0	0	4.96693	0	0	100	52811.5	0	0	52811.5	356832	0	0	356832
825	Muara Bungo	Indonesia	Asia	South-Eastern Asia	-1.49134	102.111	1975	2030	11	1	FULL	0	0	7	0	7	8.95617	0	0	8.95617	0	8.95617	22.8877	0	0	22.8877	0	22.8877	13.9315	0	0	13.9315	0	13.9315	1.2665	0	0	1.2665	0	0	63.6364	69105.5	0	0	69105.5	172405	0	0	172405
826	Muara Enim	Indonesia	Asia	South-Eastern Asia	-3.65456	103.774	1975	2030	11	2	FULL	0	0	5	0	5	7.94422	0	0	7.94422	0	7.94422	13.9036	0	0	13.9036	0	13.9036	5.95936	0	0	5.95936	0	5.95936	0.54176	0	0	0.54176	0	0	45.4545	65857.6	0	0	65857.6	82274.6	0	0	82274.6
827	Mudanjiang	China	Asia	Eastern Asia	44.5804	129.603	1975	2030	11	1	FULL	0	0	8	0	8	87.9256	0	0	87.9256	0	87.9256	119.897	0	0	119.897	0	119.897	31.9718	0	0	31.9718	0	31.9718	2.90653	0	0	2.90653	0	0	72.7273	584536	0	0	584536	743579	0	0	743579
828	Muhanga	Rwanda	Africa	Eastern Africa	-2.07679	29.7524	2005	2030	5	6	FULL	0	0	1	0	1	18.9019	0	0	18.9019	0	18.9019	22.8818	0	0	22.8818	0	22.8818	3.97996	0	0	3.97996	0	3.97996	0.795991	0	0	0.795991	0	0	20	59853.5	0	0	59853.5	66377.9	0	0	66377.9
831	Muncar	Indonesia	Asia	South-Eastern Asia	-8.43943	114.333	1975	2030	11	5	FULL	0	0	7	0	7	10.9442	0	0	10.9442	0	10.9442	60.6947	0	0	60.6947	0	60.6947	49.7505	0	0	49.7505	0	49.7505	4.52277	0	0	4.52277	0	0	63.6364	80976.8	0	0	80976.8	165639	0	0	165639
832	Munchon	North Korea	Asia	Eastern Asia	39.2491	127.363	1975	2030	11	1	PARTIAL	0	0	0	0	0	14.975	0	0	2.61506	0	2.61506	23.9599	0	0	2.61506	0	2.61506	8.98487	0	0	0	0	0	0.816806	0	0	0	0	0	0	87637.3	0	0	6855.36	115469	0	0	8316.39
833	Muntilan	Indonesia	Asia	South-Eastern Asia	-7.58231	110.282	1975	2030	11	6	FULL	0	8	8	8	0	27.8009	0	27.8009	27.8009	27.8009	0	76.452	0	76.452	76.452	76.452	0	48.651	0	48.651	48.651	48.651	0	4.42282	0	4.42282	4.42282	0	72.7273	0	138859	0	138859	138859	225500	0	225500	225500
834	Muroran	Japan	Asia	Eastern Asia	42.3417	141.008	1975	2030	11	7	FULL	1	3	3	3	0	53.9218	0	53.9218	53.9218	53.9218	0	58.9154	2.01743	58.9154	58.9154	56.8979	0	4.99355	2.01743	4.99355	4.99355	2.97612	0	0.453959	0.183402	0.453959	0.453959	9.09091	27.2727	0	128709	0	128709	128709	86582.9	6004.78	86582.9	86582.9
835	Mus	Turkey	Asia	Western Asia	38.7459	41.5022	1975	2030	11	1	FULL	0	0	2	0	2	7.99112	0	0	7.99112	0	7.99112	9.98881	0	0	9.98881	0	9.98881	1.9977	0	0	1.9977	0	1.9977	0.181609	0	0	0.181609	0	0	18.1818	69436.4	0	0	69436.4	115022	0	0	115022
836	Musan	China	Asia	Eastern Asia	42.2261	129.215	1975	2030	11	1	PARTIAL	0	0	2	0	2	5.99136	0	0	5.99092	0	5.99092	16.9745	0	0	7.44993	0	7.44993	10.9832	0	0	1.459	0	1.459	0.998471	0	0	0.132637	0	0	18.1818	77124.5	0	0	77124.5	102952	0	0	70839.4
837	Musanze	Rwanda	Africa	Eastern Africa	-1.49898	29.6407	1990	2030	8	6	FULL	0	7	7	7	0	23.8714	0	23.8714	23.8714	23.8714	0	42.7695	0	42.7695	42.7695	42.7695	0	18.8981	0	18.8981	18.8981	18.8981	0	2.36226	0	2.36226	2.36226	0	87.5	0	64704	0	64704	64704	153168	0	153168	153168
839	Myingyan	Myanmar	Asia	South-Eastern Asia	21.4554	95.3914	1985	2030	9	1	FULL	0	0	3	0	3	9.95755	0	0	9.95755	0	9.95755	18.9198	0	0	18.9198	0	18.9198	8.96225	0	0	8.96225	0	8.96225	0.995806	0	0	0.995806	0	0	33.3333	53245.1	0	0	53245.1	123476	0	0	123476
840	Naga	Philippines	Asia	South-Eastern Asia	13.6269	123.195	1985	2030	9	3	FULL	0	8	8	8	0	16.8844	0	16.8844	16.8844	16.8844	0	71.5151	0	71.5151	71.5151	71.5151	0	54.6308	0	54.6308	54.6308	54.6308	0	6.07008	0	6.07008	6.07008	0	88.8889	0	56571.9	0	56571.9	56571.9	390252	0	390252	390252
841	Nagahama	Japan	Asia	Eastern Asia	35.3831	136.277	2025	2030	1	1	FULL	0	0	0	0	0	19.9471	0	0	19.9467	0	19.9467	19.9471	0	0	19.9467	0	19.9467	0	0	0	0	0	0	0	0	0	0	0	0	0	51750.3	0	0	51750.3	52680.5	0	0	52680.5
842	Nagano	Japan	Asia	Eastern Asia	36.6497	138.206	1975	2030	11	15	FULL	0	5	5	5	3	32.957	0	32.9118	32.957	32.9118	0	79.9052	0	53.4714	79.9052	53.4714	26.4338	46.9482	0	20.5596	46.9482	20.5596	26.4338	4.26802	0	1.86905	4.26802	0	45.4545	27.2727	73830.1	0	73755.5	73830.1	251051	0	183030	251051
843	Nagaoka	Japan	Asia	Eastern Asia	37.4469	138.855	1990	2030	8	11	FULL	0	0	3	0	3	18.9683	0	0	18.9683	0	18.9683	30.9477	0	0	30.9477	0	30.9477	11.9794	0	0	11.9794	0	11.9794	1.49742	0	0	1.49742	0	0	37.5	67842.7	0	0	67842.7	94224.6	0	0	94224.6
844	Nagasaki	Japan	Asia	Eastern Asia	32.7772	129.861	1975	2030	11	2	FULL	0	0	2	0	2	81.7177	0	0	81.7177	0	81.7177	77.7318	0	0	77.7318	0	77.7318	-3.98588	0	0	-3.98588	0	-3.98588	-0.362353	0	0	-0.362353	0	0	18.1818	325226	0	0	325226	278921	0	0	278921
845	Nagcarlan	Philippines	Asia	South-Eastern Asia	14.123	121.416	2005	2030	5	3	FULL	2	3	3	1	0	19.8795	15.7859	19.8795	19.8795	4.09362	0	33.7959	25.9012	33.7959	33.7959	7.89473	0	13.9164	10.1153	13.9164	13.9164	3.8011	0	2.78328	2.02306	2.78328	2.78328	40	20	0	62631.4	47070.1	62631.4	62631.4	134382	104022	134382	134382
846	Nagoya	Japan	Asia	Eastern Asia	35.1291	136.861	1975	2030	11	3	PARTIAL	0	0	8	0	8	1995.28	0	0	1028.07	0	1028.07	2349.48	0	0	1167.55	0	1167.55	354.2	0	0	139.483	0	139.483	32.2	0	0	12.6803	0	0	72.7273	6.08667e+06	0	0	3.63455e+06	7.46674e+06	0	0	4.44329e+06
848	Nairobi	Kenya	Africa	Eastern Africa	-1.28462	36.8399	1975	2030	11	5	FULL	0	0	11	0	11	147.103	0	0	147.103	0	147.103	608.287	0	0	608.287	0	608.287	461.184	0	0	461.184	0	461.184	41.9258	0	0	41.9258	0	0	100	564452	0	0	564452	7.93478e+06	0	0	7.93478e+06
849	Naivasha	Kenya	Africa	Eastern Africa	-0.720122	36.4356	2015	2030	3	6	FULL	0	3	3	3	0	12.9283	0	12.9283	12.9283	12.9283	0	45.747	0	45.747	45.747	45.747	0	32.8187	0	32.8187	32.8187	32.8187	0	10.9396	0	10.9396	10.9396	0	100	0	82269.8	0	82269.8	82269.8	300524	0	300524	300524
851	Nakhchivan	Azerbaijan	Asia	Western Asia	39.2059	45.4031	1980	2030	10	3	FULL	0	0	4	0	4	16.9635	0	0	16.9635	0	16.9635	22.9508	0	0	22.9508	0	22.9508	5.98733	0	0	5.98733	0	5.98733	0.598733	0	0	0.598733	0	0	40	56885.5	0	0	56885.5	189010	0	0	189010
852	Nakonde	Zambia	Africa	Eastern Africa	-9.32335	32.7583	2005	2030	5	2	FULL	0	0	3	0	3	14.8931	0	0	14.8931	0	14.8931	19.8575	0	0	19.8575	0	19.8575	4.96442	0	0	4.96442	0	4.96442	0.992885	0	0	0.992885	0	0	60	58622.8	0	0	58622.8	161409	0	0	161409
853	Nakuru	Kenya	Africa	Eastern Africa	-0.297104	36.0673	1980	2030	10	7	FULL	8	9	9	9	0	16.9173	3.65779	16.9173	16.9173	13.2595	0	103.489	45.8002	103.489	103.489	57.6887	0	86.5716	42.1424	86.5716	86.5716	44.4292	0	8.65716	4.21424	8.65716	8.65716	80	90	0	51282.9	6551.07	51282.9	51282.9	758809	224680	758809	758809
854	Nalchik	Russia	Europe	Eastern Europe	43.4946	43.6275	1975	2030	11	1	PARTIAL	0	0	6	0	6	33.9704	0	0	28.6857	0	28.6857	48.9588	0	0	36.6779	0	36.6779	14.9884	0	0	7.99219	0	7.99219	1.36258	0	0	0.726563	0	0	54.5455	158203	0	0	140764	222660	0	0	185702
855	Nampa	United States of America	North America	Northern America	43.5681	-116.571	2015	2030	3	1	FULL	0	0	3	0	3	35.9585	0	0	35.9585	0	35.9585	55.9372	0	0	55.9372	0	55.9372	19.9786	0	0	19.9786	0	19.9786	6.65955	0	0	6.65955	0	0	100	62904	0	0	62904	98131.6	0	0	98131.6
856	Nanaimo	Canada	North America	Northern America	49.2017	-123.985	2010	2030	4	1	PARTIAL	0	0	0	0	0	42.0123	0	0	4.85593	0	4.85593	49.0147	0	0	4.85593	0	4.85593	7.00238	0	0	0	0	0	1.7506	0	0	0	0	0	0	57998.7	0	0	3639.91	81607.6	0	0	4492.99
857	Napa	United States of America	North America	Northern America	38.3084	-122.299	2000	2030	6	1	FULL	0	0	3	0	3	24.9426	0	0	24.9426	0	24.9426	33.9214	0	0	33.9214	0	33.9214	8.97885	0	0	8.97885	0	8.97885	1.49648	0	0	1.49648	0	0	50	54049.7	0	0	54049.7	81264.9	0	0	81264.9
858	Naples	Italy	Europe	Southern Europe	40.8521	14.3355	1975	2030	11	3	FULL	3	7	7	7	0	515.115	215.37	515.115	515.115	299.745	0	611.951	221.646	611.951	611.951	390.306	0	96.8367	6.27578	96.8367	96.8367	90.5609	0	8.80334	0.570525	8.80334	8.80334	27.2727	63.6364	0	2.58808e+06	1.15143e+06	2.58808e+06	2.58808e+06	2875128	1.12122e+06	2875128	2875128
859	Nasugbu	Philippines	Asia	South-Eastern Asia	14.0806	120.63	2015	2030	3	3	FULL	0	0	0	0	0	12.9347	0	0	12.9347	0	12.9347	12.9347	0	0	12.9347	0	12.9347	0	0	0	0	0	0	0	0	0	0	0	0	0	54742	0	0	54742	69467	0	0	69467
860	Nazilli	Turkey	Asia	Western Asia	37.9146	28.3322	1975	2030	11	1	FULL	0	0	4	0	4	7.983	0	0	7.983	0	7.983	12.9722	0	0	12.9722	0	12.9722	4.98924	0	0	4.98924	0	4.98924	0.453568	0	0	0.453568	0	0	36.3636	59447.7	0	0	59447.7	132634	0	0	132634
861	Nazran	Russia	Europe	Eastern Europe	43.2217	44.7648	2000	2030	6	1	FULL	0	0	3	0	3	17.9782	0	0	17.9782	0	17.9782	47.941	0	0	47.941	0	47.941	29.9628	0	0	29.9628	0	29.9628	4.99381	0	0	4.99381	0	0	50	56353.6	0	0	56353.6	145506	0	0	145506
862	Ndenderu	Kenya	Africa	Eastern Africa	-1.17517	36.7484	2015	2030	3	5	FULL	0	0	0	0	0	19.8812	0	0	19.8812	0	19.8812	19.8812	0	0	19.8812	0	19.8812	0	0	0	0	0	0	0	0	0	0	0	0	0	54399.4	0	0	54399.4	52934.1	0	0	52934.1
863	Ndop	Cameroon	Africa	Middle Africa	5.99041	10.4362	1995	2030	7	1	FULL	0	0	0	0	0	11.9194	0	6.95658	11.9194	6.95658	4.96279	11.9194	0	6.95658	11.9194	6.95658	4.96279	0	0	0	0	0	0	0	0	0	0	0	0	0	50094.6	0	27448.3	50094.6	61074.2	0	32424.2	61074.2
864	Nebaj	Guatemala	North America	Central America	15.4073	-91.1476	2025	2030	1	5	FULL	0	0	0	0	0	6.96064	0	0	6.96064	0	6.96064	6.96064	0	0	6.96064	0	6.96064	0	0	0	0	0	0	0	0	0	0	0	0	0	53080.4	0	0	53080.4	57267.1	0	0	57267.1
865	Negara	Indonesia	Asia	South-Eastern Asia	-8.35947	114.625	1975	2030	11	6	FULL	0	0	2	0	2	9.94449	0	0	9.94449	0	9.94449	13.9224	0	0	13.9224	0	13.9224	3.9779	0	0	3.9779	0	3.9779	0.361627	0	0	0.361627	0	0	18.1818	76241.4	0	0	76241.4	97821	0	0	97821
866	Nehe	China	Asia	Eastern Asia	48.4796	124.858	1975	2030	11	1	PARTIAL	0	0	4	0	4	12.0049	0	0	8.51048	0	8.51048	16.0068	0	0	11.5549	0	11.5549	4.00187	0	0	3.04445	0	3.04445	0.363806	0	0	0.276768	0	0	36.3636	107493	0	0	94859.6	86717.9	0	0	74362.6
867	Neiva	Colombia	South America	South America	2.93227	-75.2774	1975	2030	11	1	FULL	0	0	8	0	8	22.8294	0	0	22.8294	0	22.8294	48.6356	0	0	48.6356	0	48.6356	25.8062	0	0	25.8062	0	25.8062	2.34602	0	0	2.34602	0	0	72.7273	119842	0	0	119842	335695	0	0	335695
868	Nenjiang	China	Asia	Eastern Asia	49.1728	125.221	1975	2030	11	2	FULL	0	0	3	0	3	13.0112	0	0	13.0112	0	13.0112	19.0152	0	0	19.0152	0	19.0152	6.00402	0	0	6.00402	0	6.00402	0.54582	0	0	0.54582	0	0	27.2727	132971	0	0	132971	133264	0	0	133264
869	Neuwied	Germany	Europe	Western Europe	50.4315	7.44225	1975	2030	11	1	FULL	0	0	5	0	5	25.0194	0	0	25.0194	0	25.0194	29.022	0	0	29.022	0	29.022	4.00253	0	0	4.00253	0	4.00253	0.363866	0	0	0.363866	0	0	45.4545	52483.6	0	0	52483.6	59669.8	0	0	59669.8
870	Nevsehir	Turkey	Asia	Western Asia	38.6275	34.7161	1995	2030	7	2	FULL	0	0	1	0	1	11.9796	0	0	11.9796	0	11.9796	16.9704	0	0	16.9704	0	16.9704	4.99081	0	0	4.99081	0	4.99081	0.712973	0	0	0.712973	0	0	14.2857	53071.1	0	0	53071.1	87687.1	0	0	87687.1
871	Nganjuk	Indonesia	Asia	South-Eastern Asia	-7.59716	111.887	1975	2030	11	6	FULL	0	6	6	6	1	67.5239	0	55.7202	67.5239	55.7202	11.8037	132.07	0	115.581	132.07	115.581	16.4884	64.5458	0	59.8612	64.5458	59.8612	4.68468	5.8678	0	5.44192	5.8678	0	54.5455	9.09091	250899	0	205670	250899	375193	0	330524	375193
872	Ngawi	Indonesia	Asia	South-Eastern Asia	-7.40658	111.442	1975	2030	11	2	FULL	0	0	3	0	3	12.9062	0	0	12.9062	0	12.9062	17.8702	0	0	17.8702	0	17.8702	4.96407	0	0	4.96407	0	4.96407	0.451279	0	0	0.451279	0	0	27.2727	104742	0	0	104742	78653.5	0	0	78653.5
873	Ngluwar	Indonesia	Asia	South-Eastern Asia	-7.65175	110.302	2005	2030	5	6	FULL	0	2	2	2	0	22.8367	0	22.8367	22.8367	22.8367	0	26.8073	0	26.8073	26.8073	26.8073	0	3.97061	0	3.97061	3.97061	3.97061	0	0.794122	0	0.794122	0.794122	0	40	0	55831.8	0	55831.8	55831.8	60082.9	0	60082.9	60082.9
874	Ngong	Kenya	Africa	Eastern Africa	-1.353	36.6646	2010	2030	4	5	FULL	0	0	3	0	3	13.9185	0	0	13.9185	0	13.9185	17.8953	0	0	17.8953	0	17.8953	3.97676	0	0	3.97676	0	3.97676	0.99419	0	0	0.99419	0	0	75	53767.1	0	0	53767.1	81456.7	0	0	81456.7
875	Ngungu Centre	Dem. Rep. Congo	Africa	Middle Africa	-1.65887	28.8742	2010	2030	4	6	FULL	0	0	2	0	2	4.96799	0	0	4.96799	0	4.96799	6.95508	0	0	6.95508	0	6.95508	1.9871	0	0	1.9871	0	1.9871	0.496774	0	0	0.496774	0	0	50	50290.9	0	0	50290.9	53822.2	0	0	53822.2
876	Nigde	Turkey	Asia	Western Asia	37.9686	34.6798	1990	2030	8	2	FULL	0	0	3	0	3	9.98089	0	0	9.98089	0	9.98089	17.9654	0	0	17.9654	0	17.9654	7.98453	0	0	7.98453	0	7.98453	0.998066	0	0	0.998066	0	0	37.5	50164.9	0	0	50164.9	98774.1	0	0	98774.1
877	Niigata	Japan	Asia	Eastern Asia	37.9138	139.053	1975	2030	11	3	FULL	0	0	5	0	5	103.819	0	0	103.819	0	103.819	142.75	0	0	142.75	0	142.75	38.9305	0	0	38.9305	0	38.9305	3.53914	0	0	3.53914	0	0	45.4545	261126	0	0	261126	401978	0	0	401978
878	Ning'an	China	Asia	Eastern Asia	44.3378	129.462	1975	2030	11	1	FULL	0	0	5	0	5	11.9888	0	0	11.9888	0	11.9888	24.9766	0	0	24.9766	0	24.9766	12.9877	0	0	12.9877	0	12.9877	1.1807	0	0	1.1807	0	0	45.4545	67614.8	0	0	67614.8	65968.3	0	0	65968.3
879	Nkongsamba	Cameroon	Africa	Middle Africa	4.95877	9.93654	1975	2030	11	1	FULL	0	0	4	0	4	14.8932	0	0	14.8932	0	14.8932	18.8648	0	0	18.8648	0	18.8648	3.97164	0	0	3.97164	0	3.97164	0.361058	0	0	0.361058	0	0	36.3636	100584	0	0	100584	181928	0	0	181928
880	Nobeoka	Japan	Asia	Eastern Asia	32.5798	131.676	1975	2030	11	3	FULL	0	0	2	0	2	34.927	0	0	34.927	0	34.927	35.925	0	0	35.925	0	35.925	0.998039	0	0	0.998039	0	0.998039	0.0907309	0	0	0.0907309	0	0	18.1818	108941	0	0	108941	91010.2	0	0	91010.2
881	Nola	Italy	Europe	Southern Europe	40.9338	14.5295	1985	2030	9	3	FULL	0	1	1	1	0	20.9636	0	20.9636	20.9636	20.9636	0	22.9602	0	22.9602	22.9602	22.9602	0	1.99656	0	1.99656	1.99656	1.99656	0	0.22184	0	0.22184	0.22184	0	11.1111	0	53341	0	53341	53341	66030.9	0	66030.9	66030.9
885	North Shewa	Ethiopia	Africa	Eastern Africa	9.54828	38.8724	2005	2030	5	1	FULL	0	0	3	0	3	2.97865	0	0	2.97865	0	2.97865	5.95736	0	0	5.95736	0	5.95736	2.97872	0	0	2.97872	0	2.97872	0.595743	0	0	0.595743	0	0	60	54290.1	0	0	54290.1	51209.9	0	0	51209.9
887	Nueva Loja	Ecuador	South America	South America	0.0859316	-76.8925	2015	2030	3	2	FULL	0	0	1	0	1	15.8976	0	0	15.8976	0	15.8976	17.8848	0	0	17.8848	0	17.8848	1.9872	0	0	1.9872	0	1.9872	0.662399	0	0	0.662399	0	0	33.3333	56161	0	0	56161	83144.2	0	0	83144.2
888	Numazu	Japan	Asia	Eastern Asia	35.1139	138.888	1975	2030	11	7	FULL	2	5	5	5	0	106.767	0	106.767	106.767	106.767	0	109.759	0	109.759	109.759	109.759	0	2.99198	0	2.99198	2.99198	2.99198	0	0.271999	0	0.271999	0.271999	18.1818	45.4545	0	380551	0	380551	380551	365985	0	365985	365985
893	Nyeri	Kenya	Africa	Eastern Africa	-0.428379	36.9566	2000	2030	6	5	FULL	0	0	2	0	2	14.9069	0	0	14.9069	0	14.9069	15.9006	0	0	15.9006	0	15.9006	0.993781	0	0	0.993781	0	0.993781	0.16563	0	0	0.16563	0	0	33.3333	52312.7	0	0	52312.7	62340.1	0	0	62340.1
894	Obihiro	Japan	Asia	Eastern Asia	42.9263	143.19	1975	2030	11	4	FULL	0	0	5	0	5	43.9781	0	0	43.9781	0	43.9781	55.9694	0	0	55.9694	0	55.9694	11.9912	0	0	11.9912	0	11.9912	1.09011	0	0	1.09011	0	0	45.4545	119534	0	0	119534	145553	0	0	145553
897	Ã–demis	Turkey	Asia	Western Asia	38.229	27.9751	1980	2030	10	1	FULL	0	0	3	0	3	6.98459	0	0	6.98459	0	6.98459	9.9779	0	0	9.9779	0	9.9779	2.99331	0	0	2.99331	0	2.99331	0.299331	0	0	0.299331	0	0	30	52755.5	0	0	52755.5	89130.7	0	0	89130.7
898	Oita	Japan	Asia	Eastern Asia	33.2445	131.64	1975	2030	11	3	FULL	0	8	10	8	7	76.8474	0	75.9865	76.8474	75.9865	0.860896	137.728	0	105.206	137.728	105.206	32.5225	60.8807	0	29.2191	60.8807	29.2191	31.6616	5.53461	0	2.65628	5.53461	0	72.7273	63.6364	140219	0	140185	140219	308997	0	272895	308997
899	Okaya	Japan	Asia	Eastern Asia	36.0694	138.063	1975	2030	11	13	FULL	0	1	1	1	0	24.9718	0	24.9718	24.9718	24.9718	0	20.9759	0	20.9759	20.9759	20.9759	0	-3.99582	0	-3.99582	-3.99582	-3.99582	0	-0.363256	0	-0.363256	-0.363256	0	9.09091	0	81102.4	0	81102.4	81102.4	60714	0	60714	60714
900	Olongapo	Philippines	Asia	South-Eastern Asia	14.8403	120.292	1975	2030	11	1	FULL	0	1	5	1	5	21.9001	0	1.1811	21.9001	1.1811	20.719	30.8593	0	2.17636	30.8593	2.17636	28.6829	8.95913	0	0.995262	8.95913	0.995262	7.96386	0.814466	0	0.0904784	0.814466	0	9.09091	45.4545	156095	0	3481.86	156095	172659	0	5621.33	172659
901	Omura	Japan	Asia	Eastern Asia	32.9216	129.949	1975	2030	11	1	FULL	0	0	1	0	1	34.8817	0	0	34.8817	0	34.8817	34.8817	0	0	34.8817	0	34.8817	0	0	0	0	0	0	0	0	0	0	0	0	9.09091	96427.1	0	0	96427.1	65908.6	0	0	65908.6
902	Omuta	Japan	Asia	Eastern Asia	33.0167	130.447	1975	2030	11	4	FULL	0	1	3	1	3	69.7842	0	25.336	69.7842	25.336	44.4481	66.7933	0	26.2963	66.7933	26.2963	40.4969	-2.99088	0	0.960302	-2.99088	0.960302	-3.95118	-0.271898	0	0.0873002	-0.271898	0	9.09091	27.2727	161693	0	47379.6	161693	123516	0	40348.4	123516
903	Ongata Rongai	Kenya	Africa	Eastern Africa	-1.39393	36.7499	1995	2030	7	4	FULL	0	0	3	0	3	12.9227	0	0	12.9227	0	12.9227	18.8872	0	0	18.8872	0	18.8872	5.96443	0	0	5.96443	0	5.96443	0.852061	0	0	0.852061	0	0	42.8571	57154	0	0	57154	154168	0	0	154168
904	Onomichi	Japan	Asia	Eastern Asia	34.4197	133.218	1975	2030	11	1	PARTIAL	0	0	5	0	5	50.8669	0	0	50.8669	0	50.8669	53.8591	0	0	53.388	0	53.388	2.99215	0	0	2.52104	0	2.52104	0.272014	0	0	0.229185	0	0	45.4545	97090	0	0	97090	92828.2	0	0	92232.9
905	Orani	Philippines	Asia	South-Eastern Asia	14.7702	120.544	1995	2030	7	2	FULL	0	0	3	0	3	20.8964	0	0	20.8964	0	20.8964	40.8002	0	0	40.8002	0	40.8002	19.9038	0	0	19.9038	0	19.9038	2.8434	0	0	2.8434	0	0	42.8571	61933.2	0	0	61933.2	155009	0	0	155009
906	Orito	Colombia	South America	South America	0.662746	-76.8703	2025	2030	1	4	FULL	0	0	0	0	0	8.9422	0	0	8.9422	0	8.9422	8.9422	0	0	8.9422	0	8.9422	0	0	0	0	0	0	0	0	0	0	0	0	0	51867.9	0	0	51867.9	55609.5	0	0	55609.5
907	Orizaba	Mexico	North America	Central America	18.85	-97.1009	1975	2030	11	8	FULL	0	7	7	7	3	25.8669	0	25.6447	25.8669	25.6447	0	74.6157	0	68.6945	74.6157	68.6945	5.9212	48.7487	0	43.0498	48.7487	43.0498	5.9212	4.4317	0	3.91362	4.4317	0	63.6364	27.2727	85313.9	0	85214.1	85313.9	337764	0	322628	337764
908	Ormoc	Philippines	Asia	South-Eastern Asia	11.0156	124.599	2005	2030	5	2	FULL	0	0	2	0	2	12.9186	0	0	12.9186	0	12.9186	27.8259	0	0	27.8259	0	27.8259	14.9072	0	0	14.9072	0	14.9072	2.98145	0	0	2.98145	0	0	40	55549.3	0	0	55549.3	108429	0	0	108429
909	Osaki	Japan	Asia	Eastern Asia	38.5767	140.96	2005	2030	5	5	FULL	0	0	0	0	0	14.9656	0	14.9656	14.9656	14.9656	0	14.9656	0	14.9656	14.9656	14.9656	0	0	0	0	0	0	0	0	0	0	0	0	0	0	51703.7	0	51703.7	51703.7	51459.2	0	51459.2	51459.2
911	Osorno	Chile	South America	South America	-40.5789	-73.1404	1975	2030	11	6	FULL	0	0	6	0	6	15.9792	0	0	15.9792	0	15.9792	32.9624	0	0	32.9624	0	32.9624	16.9832	0	0	16.9832	0	16.9832	1.54393	0	0	1.54393	0	0	54.5455	63152.3	0	0	63152.3	139775	0	0	139775
912	Ota	Japan	Asia	Eastern Asia	36.2976	139.409	1975	2030	11	12	FULL	0	3	7	3	7	106.752	0	0.840286	106.752	0.840286	105.912	135.688	0	8.33124	135.688	8.33124	127.356	28.9353	0	7.49095	28.9353	7.49095	21.4444	2.63048	0	0.680996	2.63048	0	27.2727	63.6364	256641	0	1508.63	256641	240180	0	14146.6	240180
913	Otaru	Japan	Asia	Eastern Asia	43.1933	141.014	1975	2030	11	5	FULL	0	0	1	0	1	32.9598	0	0	32.9598	0	32.9598	32.9598	0	0	32.9598	0	32.9598	0	0	0	0	0	0	0	0	0	0	0	0	9.09091	127612	0	0	127612	92925.1	0	0	92925.1
914	Otavalo	Ecuador	South America	South America	0.23616	-78.2631	2020	2030	2	15	FULL	0	0	0	0	0	9.94836	7.4718	9.94836	9.94836	2.47655	0	9.94836	7.4718	9.94836	9.94836	2.47655	0	0	0	0	0	0	0	0	0	0	0	0	0	0	52601.5	43849.7	52601.5	52601.5	55402	46159.3	55402	55402
916	Oyama	Japan	Asia	Eastern Asia	36.3003	139.803	1975	2030	11	8	FULL	0	0	5	0	5	24.9365	0	0	24.9365	0	24.9365	37.9036	0	0	37.9036	0	37.9036	12.9671	0	0	12.9671	0	12.9671	1.17883	0	0	1.17883	0	0	45.4545	89993.7	0	0	89993.7	83824.5	0	0	83824.5
917	Ozamiz	Philippines	Asia	South-Eastern Asia	8.15079	123.847	2000	2030	6	2	FULL	0	0	5	0	5	15.888	0	0	15.888	0	15.888	45.6745	0	0	45.6745	0	45.6745	29.7866	0	0	29.7866	0	29.7866	4.96443	0	0	4.96443	0	0	83.3333	57856	0	0	57856	173751	0	0	173751
918	Ozumba de Alzate	Mexico	North America	Central America	19.0325	-98.7983	2020	2030	2	5	FULL	0	0	0	0	0	14.9084	0	14.9084	14.9084	14.9084	0	14.9084	0	14.9084	14.9084	14.9084	0	0	0	0	0	0	0	0	0	0	0	0	0	0	54975.7	0	54975.7	54975.7	57588.8	0	57588.8	57588.8
919	Pachuca	Mexico	North America	Central America	20.1133	-98.7444	2005	2030	5	1	PARTIAL	0	0	4	0	4	61.6337	0	0	6.22525	0	6.22525	74.5574	0	0	16.222	0	16.222	12.9238	0	0	9.9968	0	9.9968	2.58475	0	0	1.99936	0	0	80	249682	0	0	12347.5	340885	0	0	49786
920	Pacitan	Indonesia	Asia	South-Eastern Asia	-8.19712	111.101	1975	2030	11	3	FULL	0	0	3	0	3	16.8771	0	0	16.8771	0	16.8771	26.8051	0	0	26.8051	0	26.8051	9.92799	0	0	9.92799	0	9.92799	0.902544	0	0	0.902544	0	0	27.2727	196765	0	0	196765	159926	0	0	159926
921	Padang	Indonesia	Asia	South-Eastern Asia	-0.917373	100.373	1975	2030	11	3	FULL	0	3	10	3	10	108.244	0	10.7828	108.244	10.7828	97.4617	212.516	0	38.7544	212.516	38.7544	173.762	104.272	0	27.9716	104.272	27.9716	76.3002	9.47925	0	2.54287	9.47925	0	27.2727	90.9091	366959	0	33462	366959	1.28529e+06	0	192210	1.28529e+06
922	Padang Sidempuan	Indonesia	Asia	South-Eastern Asia	1.38281	99.2764	1975	2030	11	1	FULL	0	0	7	0	7	16.8731	0	0	16.8731	0	16.8731	39.7025	0	0	39.7025	0	39.7025	22.8294	0	0	22.8294	0	22.8294	2.0754	0	0	2.0754	0	0	63.6364	107387	0	0	107387	240196	0	0	240196
923	Padangan	Indonesia	Asia	South-Eastern Asia	-7.14779	111.604	1975	2030	11	2	FULL	0	0	2	0	2	21.8427	0	0	21.8427	0	21.8427	26.8066	0	0	26.8066	0	26.8066	4.9639	0	0	4.9639	0	4.9639	0.451263	0	0	0.451263	0	0	18.1818	133585	0	0	133585	110310	0	0	110310
924	Paechon	North Korea	Asia	Eastern Asia	37.9943	126.309	1975	2030	11	1	FULL	0	0	1	0	1	3.99575	0	0	3.99575	0	3.99575	4.99487	0	0	4.99487	0	4.99487	0.999111	0	0	0.999111	0	0.999111	0.0908283	0	0	0.0908283	0	0	9.09091	86533.5	0	0	86533.5	108241	0	0	108241
925	Pagadian	Philippines	Asia	South-Eastern Asia	7.82312	123.434	1995	2030	7	1	PARTIAL	0	0	3	0	3	10.9207	0	0	8.08318	0	8.08318	35.7419	0	0	23.4202	0	23.4202	24.8212	0	0	15.3371	0	15.3371	3.54588	0	0	2.19101	0	0	42.8571	50608.5	0	0	40899.9	214447	0	0	160916
926	Pagar Alam	Indonesia	Asia	South-Eastern Asia	-4.02219	103.247	1995	2030	7	3	FULL	0	1	1	1	0	8.94177	0	8.94177	8.94177	8.94177	0	10.9287	0	10.9287	10.9287	10.9287	0	1.98697	0	1.98697	1.98697	1.98697	0	0.283853	0	0.283853	0.283853	0	14.2857	0	51524.9	0	51524.9	51524.9	58808.6	0	58808.6	58808.6
927	Pagsanjan	Philippines	Asia	South-Eastern Asia	14.3038	121.458	2010	2030	4	3	FULL	0	1	1	1	0	24.8617	0	23.9623	24.8617	23.9623	0.899405	25.8556	0	24.9561	25.8556	24.9561	0.899405	0.993868	0	0.993868	0.993868	0.993868	0	0.248467	0	0.248467	0.248467	0	25	0	58073.4	0	56764.8	58073.4	87969.1	0	85680.5	87969.1
928	Paguyangan	Indonesia	Asia	South-Eastern Asia	-7.26165	109.015	1975	2030	11	3	FULL	0	3	3	3	0	8.94528	0	8.94528	8.94528	8.94528	0	27.8298	0	27.8298	27.8298	27.8298	0	18.8845	0	18.8845	18.8845	18.8845	0	1.71677	0	1.71677	1.71677	0	27.2727	0	53178.7	0	53178.7	53178.7	90588.3	0	90588.3	90588.3
929	Paju	South Korea	Asia	Eastern Asia	37.7635	126.781	2015	2030	3	1	FULL	0	0	1	0	1	11.9812	0	0	11.9812	0	11.9812	17.9718	0	0	17.9718	0	17.9718	5.99057	0	0	5.99057	0	5.99057	1.99686	0	0	1.99686	0	0	33.3333	52061.4	0	0	52061.4	75465.1	0	0	75465.1
930	Pakdasht	Iran	Asia	Southern Asia	35.4855	51.6755	2005	2030	5	1	FULL	0	0	2	0	2	12.9617	0	0	12.9617	0	12.9617	27.9183	0	0	27.9183	0	27.9183	14.9566	0	0	14.9566	0	14.9566	2.99131	0	0	2.99131	0	0	40	57611.3	0	0	57611.3	126020	0	0	126020
931	Pakokku	Myanmar	Asia	South-Eastern Asia	21.3358	95.0783	1985	2030	9	1	FULL	0	0	4	0	4	9.95399	0	0	9.95399	0	9.95399	13.9355	0	0	13.9355	0	13.9355	3.98149	0	0	3.98149	0	3.98149	0.442388	0	0	0.442388	0	0	44.4444	62713.4	0	0	62713.4	102666	0	0	102666
932	Palabuhanratu	Indonesia	Asia	South-Eastern Asia	-7.00216	106.562	1975	2030	11	6	FULL	0	3	3	3	2	21.8554	0	6.92743	21.8554	6.92743	14.928	33.7756	0	11.4489	33.7756	11.4489	22.3267	11.9202	0	4.52144	11.9202	4.52144	7.39872	1.08365	0	0.41104	1.08365	0	27.2727	18.1818	128255	0	79732.8	128255	134446	0	73967.5	134446
933	Palm Desert	United States of America	North America	Northern America	33.7576	-116.403	2010	2030	4	1	PARTIAL	0	0	3	0	3	70.7642	0	0	52.0468	0	52.0468	81.7286	0	0	57.0382	0	57.0382	10.9645	0	0	4.9914	0	4.9914	2.74111	0	0	1.24785	0	0	75	83128.9	0	0	41066	134696	0	0	65201.9
934	Palmira	Colombia	South America	South America	3.53356	-76.2988	1975	2030	11	1	FULL	0	0	5	0	5	19.8618	0	0	19.8618	0	19.8618	25.8204	0	0	25.8204	0	25.8204	5.95861	0	0	5.95861	0	5.95861	0.541692	0	0	0.541692	0	0	45.4545	119855	0	0	119855	181432	0	0	181432
935	Pamanukan	Indonesia	Asia	South-Eastern Asia	-6.2924	107.822	2000	2030	6	4	FULL	0	0	0	0	0	12.9392	0	0	12.9392	0	12.9392	12.9392	0	0	12.9392	0	12.9392	0	0	0	0	0	0	0	0	0	0	0	0	0	52629.2	0	0	52629.2	55440.9	0	0	55440.9
936	Pamekasan	Indonesia	Asia	South-Eastern Asia	-7.14676	113.49	1975	2030	11	3	FULL	0	0	6	0	6	38.7885	0	0	38.7885	0	38.7885	58.6793	0	0	58.6793	0	58.6793	19.8908	0	0	19.8908	0	19.8908	1.80825	0	0	1.80825	0	0	54.5455	250669	0	0	250669	233243	0	0	233243
937	Panabo	Philippines	Asia	South-Eastern Asia	7.30713	125.686	2000	2030	6	2	FULL	0	0	5	0	5	19.8971	0	0	19.8971	0	19.8971	58.6975	0	0	58.6975	0	58.6975	38.8004	0	0	38.8004	0	38.8004	6.46674	0	0	6.46674	0	0	83.3333	75143.9	0	0	75143.9	309768	0	0	309768
938	Pandan	Indonesia	Asia	South-Eastern Asia	1.68637	98.8258	2020	2030	2	1	PARTIAL	0	0	0	0	0	12.9028	0	0	1.63542	0	1.63542	12.9028	0	0	1.63542	0	1.63542	0	0	0	0	0	0	0	0	0	0	0	0	0	86789.5	0	0	4460.28	81296.8	0	0	4450.92
939	Pandeglang	Indonesia	Asia	South-Eastern Asia	-6.30518	106.108	1975	2030	11	6	FULL	10	10	10	3	0	15.889	15.889	15.889	15.889	0	0	74.484	63.0986	74.484	74.484	11.3854	0	58.595	47.2096	58.595	58.595	11.3854	0	5.32681	4.29178	5.32681	5.32681	90.9091	27.2727	0	152265	152265	152265	152265	346800	322960	346800	346800
940	Pangandaran	Indonesia	Asia	South-Eastern Asia	-7.69012	108.656	1980	2030	10	4	FULL	0	0	4	0	4	7.95493	0	0	7.95493	0	7.95493	23.8654	0	0	23.8654	0	23.8654	15.9105	0	0	15.9105	0	15.9105	1.59105	0	0	1.59105	0	0	40	51814.5	0	0	51814.5	102054	0	0	102054
941	Pangkalan Brandan	Indonesia	Asia	South-Eastern Asia	4.01606	98.2863	1975	2030	11	2	FULL	0	0	4	0	4	10.9199	0	0	10.9199	0	10.9199	16.8765	0	0	16.8765	0	16.8765	5.95657	0	0	5.95657	0	5.95657	0.541506	0	0	0.541506	0	0	36.3636	115518	0	0	115518	92145.6	0	0	92145.6
942	Paniqui	Philippines	Asia	South-Eastern Asia	15.6795	120.581	2020	2030	2	1	FULL	0	0	0	0	0	18.9089	0	0	18.9089	0	18.9089	18.9089	0	0	18.9089	0	18.9089	0	0	0	0	0	0	0	0	0	0	0	0	0	52932.5	0	0	52932.5	55764	0	0	55764
943	Panshi	China	Asia	Eastern Asia	42.9388	126.055	1975	2030	11	1	FULL	0	0	3	0	3	12.0016	0	0	12.0016	0	12.0016	15.003	0	0	15.003	0	15.003	3.0014	0	0	3.0014	0	3.0014	0.272854	0	0	0.272854	0	0	27.2727	65657.9	0	0	65657.9	103293	0	0	103293
944	Panundaan	Indonesia	Asia	South-Eastern Asia	-7.10554	107.451	2005	2030	5	11	FULL	2	2	2	2	0	19.89	13.8104	19.89	19.89	6.07959	0	28.841	17.0126	28.841	28.841	11.8284	0	8.95098	3.20213	8.95098	8.95098	5.74885	0	1.7902	0.640426	1.7902	1.7902	40	40	0	57811	40173.4	57811	57811	95866.4	61087.1	95866.4	95866.4
945	Panyabungan	Indonesia	Asia	South-Eastern Asia	0.857884	99.5616	1975	2030	11	3	FULL	0	3	3	3	0	6.94827	0	6.94827	6.94827	6.94827	0	11.9112	0	11.9112	11.9112	11.9112	0	4.96288	0	4.96288	4.96288	4.96288	0	0.451171	0	0.451171	0.451171	0	27.2727	0	90516.4	0	90516.4	90516.4	103644	0	103644	103644
946	Papantla de Olarte	Mexico	North America	Central America	20.4475	-97.3251	2010	2030	4	1	FULL	0	0	1	0	1	10.9432	0	0	10.9432	0	10.9432	11.9378	0	0	11.9378	0	11.9378	0.99458	0	0	0.99458	0	0.99458	0.248645	0	0	0.248645	0	0	25	50461.4	0	0	50461.4	57708.5	0	0	57708.5
947	Papeete	Fr. Polynesia	Oceania	Polynesia	-17.5487	-149.58	1980	2030	10	2	FULL	0	0	5	0	5	36.8355	0	0	36.8355	0	36.8355	49.7774	0	0	49.7774	0	49.7774	12.9419	0	0	12.9419	0	12.9419	1.29419	0	0	1.29419	0	0	50	57348.6	0	0	57348.6	113584	0	0	113584
948	Parakan	Indonesia	Asia	South-Eastern Asia	-7.28644	110.068	1975	2030	11	6	FULL	3	4	4	3	0	23.8307	15.8872	23.8307	23.8307	7.9435	0	35.7458	24.015	35.7458	35.7458	11.7308	0	11.9151	8.1278	11.9151	11.9151	3.78726	0	1.08319	0.738891	1.08319	1.08319	27.2727	27.2727	0	124844	67598.7	124844	124844	102290	55443.1	102290	102290
951	Pardis	Iran	Asia	Southern Asia	35.7321	51.8755	2000	2030	6	1	FULL	0	0	4	0	4	15.9561	0	1.271	15.9561	1.271	14.6851	44.8761	0	1.271	44.8761	1.271	43.6051	28.9201	0	0	28.9201	0	28.9201	4.82001	0	0	4.82001	0	0	66.6667	63916.1	0	6537.75	63916.1	281487	0	6193.61	281487
952	Pare	Indonesia	Asia	South-Eastern Asia	-7.76428	112.176	1975	2030	11	7	FULL	0	3	3	3	1	56.6181	0	50.3291	56.6181	50.3291	6.28907	79.4549	0	78.6906	79.4549	78.6906	0.764301	22.8367	0	28.3615	22.8367	28.3615	-5.52477	2.07607	0	2.57832	2.07607	0	27.2727	9.09091	188871	0	175315	188871	245270	0	243225	245270
954	Pasir Pengaraian	Indonesia	Asia	South-Eastern Asia	0.876178	100.297	2015	2030	3	3	FULL	0	0	1	0	1	11.9164	0	0	11.9164	0	11.9164	13.9023	0	0	13.9023	0	13.9023	1.98589	0	0	1.98589	0	1.98589	0.661963	0	0	0.661963	0	0	33.3333	54778.5	0	0	54778.5	72134.3	0	0	72134.3
955	Pasirukem	Indonesia	Asia	South-Eastern Asia	-6.18859	107.464	1985	2030	9	4	FULL	0	0	5	0	5	16.9064	0	0	16.9064	0	16.9064	36.7975	0	0	36.7975	0	36.7975	19.8911	0	0	19.8911	0	19.8911	2.21012	0	0	2.21012	0	0	55.5556	60698.8	0	0	60698.8	149974	0	0	149974
956	Pastaza	Ecuador	South America	South America	-1.49004	-78.0039	2025	2030	1	5	FULL	0	0	1	0	1	10.9479	0	0	10.9479	0	10.9479	11.9431	0	0	11.9431	0	11.9431	0.995237	0	0	0.995237	0	0.995237	0.995237	0	0	0.995237	0	0	100	51412.4	0	0	51412.4	57989.8	0	0	57989.8
957	Pasto	Colombia	South America	South America	1.21083	-77.2781	1975	2030	11	6	FULL	2	5	5	4	0	23.8582	10.1403	23.8582	23.8582	13.7179	0	36.7824	16.1808	36.7824	36.7824	20.6016	0	12.9242	6.04048	12.9242	12.9242	6.88371	0	1.17493	0.549134	1.17493	1.17493	18.1818	36.3636	0	147028	57479	147028	147028	338559	138826	338559	338559
958	Pasuruan	Indonesia	Asia	South-Eastern Asia	-7.64616	112.898	1975	2030	11	8	FULL	0	6	7	6	3	23.8511	0	6.28458	23.8511	6.28458	17.5665	50.6872	0	24.6296	50.6872	24.6296	26.0577	26.8361	0	18.345	26.8361	18.345	8.49113	2.43965	0	1.66773	2.43965	0	54.5455	27.2727	102134	0	19721.9	102134	269163	0	103977	269163
959	Pati	Indonesia	Asia	South-Eastern Asia	-6.75517	111.03	1975	2030	11	2	PARTIAL	0	0	4	0	4	25.8094	0	0	24.1152	0	24.1152	35.7372	0	0	29.3187	0	29.3187	9.92776	0	0	5.20346	0	5.20346	0.902523	0	0	0.473042	0	0	36.3636	183025	0	0	178709	168650	0	0	147260
960	Patnos	Turkey	Asia	Western Asia	39.2349	42.857	1980	2030	10	2	FULL	0	0	4	0	4	9.98749	0	0	9.98749	0	9.98749	14.9805	0	0	14.9805	0	14.9805	4.99304	0	0	4.99304	0	4.99304	0.499304	0	0	0.499304	0	0	40	51102.7	0	0	51102.7	107096	0	0	107096
961	PÃ¡tzcuaro	Mexico	North America	Central America	19.5116	-101.608	2005	2030	5	1	FULL	0	0	2	0	2	12.9457	0	0	12.9457	0	12.9457	15.9331	0	0	15.9331	0	15.9331	2.98743	0	0	2.98743	0	2.98743	0.597486	0	0	0.597486	0	0	40	50394.1	0	0	50394.1	78369.6	0	0	78369.6
962	Payakumbuh	Indonesia	Asia	South-Eastern Asia	-0.232521	100.631	1980	2030	10	4	FULL	0	5	5	5	0	11.92	0	11.92	11.92	11.92	0	23.8393	0	23.8393	23.8393	23.8393	0	11.9192	0	11.9192	11.9192	11.9192	0	1.19192	0	1.19192	1.19192	0	50	0	50471.2	0	50471.2	50471.2	102347	0	102347	102347
963	Pekalongan	Indonesia	Asia	South-Eastern Asia	-6.89995	109.617	1975	2030	11	6	FULL	0	0	9	0	9	181.767	0	0	181.767	0	181.767	296.983	0	0	296.983	0	296.983	115.216	0	0	115.216	0	115.216	10.4742	0	0	10.4742	0	0	81.8182	976286	0	0	976286	1.24234e+06	0	0	1.24234e+06
964	Pemalang	Indonesia	Asia	South-Eastern Asia	-6.90188	109.389	1975	2030	11	4	FULL	0	0	2	0	2	54.642	0	0	54.642	0	54.642	53.6495	0	0	53.6495	0	53.6495	-0.992515	0	0	-0.992515	0	-0.992515	-0.0902286	0	0	-0.0902286	0	0	18.1818	381648	0	0	381648	258790	0	0	258790
965	Pemanggilan	Indonesia	Asia	South-Eastern Asia	-5.28876	105.191	1975	2030	11	3	FULL	0	0	5	0	5	13.8918	0	0	13.8918	0	13.8918	32.7546	0	0	32.7546	0	32.7546	18.8629	0	0	18.8629	0	18.8629	1.71481	0	0	1.71481	0	0	45.4545	79574.3	0	0	79574.3	131451	0	0	131451
966	Pematang Siantar	Indonesia	Asia	South-Eastern Asia	2.9634	99.0811	1975	2030	11	3	FULL	0	0	5	0	5	38.709	0	0	38.709	0	38.709	68.4845	0	0	68.4845	0	68.4845	29.7754	0	0	29.7754	0	29.7754	2.70686	0	0	2.70686	0	0	45.4545	365871	0	0	365871	463097	0	0	463097
967	PeÃ±aflor	Chile	South America	South America	-33.6076	-70.8758	2005	2030	5	2	FULL	0	0	1	0	1	12.964	0	0	12.964	0	12.964	14.9601	0	0	14.9601	0	14.9601	1.99613	0	0	1.99613	0	1.99613	0.399226	0	0	0.399226	0	0	20	58652.3	0	0	58652.3	96743.8	0	0	96743.8
968	PÃ©njamo	Mexico	North America	Central America	20.4311	-101.724	2025	2030	1	1	FULL	0	0	0	0	0	8.96514	0	0	8.96514	0	8.96514	8.96514	0	0	8.96514	0	8.96514	0	0	0	0	0	0	0	0	0	0	0	0	0	50452.3	0	0	50452.3	53274.7	0	0	53274.7
969	Perbaungan	Indonesia	Asia	South-Eastern Asia	3.56755	98.9632	1975	2030	11	2	FULL	0	0	3	0	3	7.9405	0	0	7.9405	0	7.9405	9.92563	0	0	9.92563	0	9.92563	1.98513	0	0	1.98513	0	1.98513	0.180466	0	0	0.180466	0	0	27.2727	60174.8	0	0	60174.8	63041.2	0	0	63041.2
970	Pereira	Colombia	South America	South America	4.81627	-75.6994	1975	2030	11	6	FULL	0	0	8	0	8	41.6952	0	0	41.6952	0	41.6952	65.5206	0	0	65.5206	0	65.5206	23.8254	0	0	23.8254	0	23.8254	2.16595	0	0	2.16595	0	0	72.7273	231281	0	0	231281	606698	0	0	606698
971	PÃ©rez ZeledÃ³n	Costa Rica	North America	Central America	9.36637	-83.6954	2010	2030	4	3	FULL	0	0	1	0	1	15.9199	0	0	15.9199	0	15.9199	16.9149	0	0	16.9149	0	16.9149	0.99505	0	0	0.99505	0	0.99505	0.248762	0	0	0.248762	0	0	25	53581.1	0	0	53581.1	51763.8	0	0	51763.8
972	Perpignan	France	Europe	Western Europe	42.7009	2.89552	1975	2030	11	1	FULL	0	0	6	0	6	19.9728	0	0	19.9728	0	19.9728	35.9519	0	0	35.9519	0	35.9519	15.9791	0	0	15.9791	0	15.9791	1.45264	0	0	1.45264	0	0	54.5455	67365.6	0	0	67365.6	126052	0	0	126052
974	Petaluma	United States of America	North America	Northern America	38.2485	-122.63	2020	2030	2	1	FULL	0	0	0	0	0	24.9411	0	0	24.9411	0	24.9411	24.9411	0	0	24.9411	0	24.9411	0	0	0	0	0	0	0	0	0	0	0	0	0	52502.8	0	0	52502.8	54667.9	0	0	54667.9
975	Phyongsan	North Korea	Asia	Eastern Asia	38.3305	126.409	1980	2030	10	1	FULL	0	0	2	0	2	10.9878	0	0	10.9878	0	10.9878	12.9857	0	0	12.9857	0	12.9857	1.99789	0	0	1.99789	0	1.99789	0.199789	0	0	0.199789	0	0	20	70982.2	0	0	70982.2	101375	0	0	101375
976	Pishva	Iran	Asia	Southern Asia	35.3097	51.72	1975	2030	11	1	FULL	0	0	4	0	4	9.97038	0	0	9.97038	0	9.97038	26.9209	0	0	26.9209	0	26.9209	16.9505	0	0	16.9505	0	16.9505	1.54095	0	0	1.54095	0	0	36.3636	69577.2	0	0	69577.2	367870	0	0	367870
977	Pitalito	Colombia	South America	South America	1.85288	-76.051	2005	2030	5	2	FULL	0	0	1	0	1	11.9139	0	0	11.9139	0	11.9139	13.8997	0	0	13.8997	0	13.8997	1.98576	0	0	1.98576	0	1.98576	0.397151	0	0	0.397151	0	0	20	53018.5	0	0	53018.5	78469.8	0	0	78469.8
978	Pohon Sirih	Indonesia	Asia	South-Eastern Asia	-8.32721	123.002	2015	2030	3	8	FULL	0	0	0	0	0	10.9208	0	10.9208	10.9208	10.9208	0	10.9208	0	10.9208	10.9208	10.9208	0	0	0	0	0	0	0	0	0	0	0	0	0	0	51151.7	0	51151.7	51151.7	56185.8	0	56185.8	56185.8
979	Polangui	Philippines	Asia	South-Eastern Asia	13.2624	123.516	2025	2030	1	4	FULL	0	0	0	0	0	43.7045	0	43.7045	43.7045	43.7045	0	43.7045	0	43.7045	43.7045	43.7045	0	0	0	0	0	0	0	0	0	0	0	0	0	0	105743	0	105743	105743	110317	0	110317	110317
980	Poldasht	Azerbaijan	Asia	Western Asia	39.349	45.0662	2000	2030	6	4	FULL	0	0	2	0	2	3.9915	0	0	3.9915	0	3.9915	5.98725	0	0	5.98725	0	5.98725	1.99575	0	0	1.99575	0	1.99575	0.332624	0	0	0.332624	0	0	33.3333	50899.4	0	0	50899.4	74283.2	0	0	74283.2
981	Polomolok	Philippines	Asia	South-Eastern Asia	6.22568	125.075	2000	2030	6	2	FULL	0	6	6	6	0	12.9204	0	12.9204	12.9204	12.9204	0	27.8315	0	27.8315	27.8315	27.8315	0	14.9111	0	14.9111	14.9111	14.9111	0	2.48519	0	2.48519	2.48519	0	100	0	52972.1	0	52972.1	52972.1	124992	0	124992	124992
983	Ponggok	Indonesia	Asia	South-Eastern Asia	-8.03684	112.102	2005	2030	5	7	FULL	0	0	0	0	0	55.6151	0	46.6869	55.6151	46.6869	8.92821	38.7327	0	38.7327	38.7327	38.7327	0	-16.8824	0	-7.95419	-16.8824	-7.95419	-8.92821	-3.37648	0	-1.59084	-3.37648	0	0	0	125234	0	97487.1	125234	84095.2	0	84095.2	84095.2
984	Ponorogo	Indonesia	Asia	South-Eastern Asia	-7.86611	111.484	1975	2030	11	3	FULL	0	1	5	1	4	29.7861	0	11.0344	29.7861	11.0344	18.7517	68.5055	0	11.0344	68.5055	11.0344	57.4712	38.7195	0	0	38.7195	0	38.7195	3.51995	0	0	3.51995	0	9.09091	36.3636	213370	0	49190.7	213370	243268	0	40920.3	243268
985	PopayÃ¡n	Colombia	South America	South America	2.4449	-76.6116	1975	2030	11	3	FULL	0	3	4	3	2	16.8865	0	14.2792	16.8865	14.2792	2.60729	25.8265	0	19.2878	25.8265	19.2878	6.53871	8.93997	0	5.00855	8.93997	5.00855	3.93142	0.812724	0	0.455322	0.812724	0	27.2727	18.1818	79166.9	0	69452.4	79166.9	228893	0	182241	228893
986	Port Vila	Vanuatu	Oceania	Melanesia	-17.7316	168.309	2020	2030	2	2	FULL	0	1	2	1	1	22.904	0	5.56871	22.904	5.56871	17.3353	34.8531	0	6.56447	34.8531	6.56447	28.2886	11.9491	0	0.995759	11.9491	0.995759	10.9534	5.97456	0	0.49788	5.97456	0	50	50	55886.6	0	24538.8	55886.6	85330.2	0	33558.4	85330.2
987	Portland	United States of America	North America	Northern America	45.5317	-122.618	1975	2030	11	6	FULL	0	0	9	0	9	254.828	0	0	254.828	0	254.828	880.412	0	0	880.412	0	880.412	625.584	0	0	625.584	0	625.584	56.8713	0	0	56.8713	0	0	81.8182	311513	0	0	311513	1.9112e+06	0	0	1.9112e+06
988	Poza Rica	Mexico	North America	Central America	20.534	-97.4453	1975	2030	11	1	PARTIAL	0	0	6	0	6	26.8592	0	0	26.8592	0	26.8592	50.7344	0	0	50.6013	0	50.6013	23.8752	0	0	23.7421	0	23.7421	2.17047	0	0	2.15837	0	0	54.5455	63932.3	0	0	63932.3	239437	0	0	239285
989	Praya	Indonesia	Asia	South-Eastern Asia	-8.70792	116.275	1975	2030	11	2	FULL	0	0	7	0	7	9.93001	0	0	9.93001	0	9.93001	34.7547	0	0	34.7547	0	34.7547	24.8247	0	0	24.8247	0	24.8247	2.25679	0	0	2.25679	0	0	63.6364	106192	0	0	106192	170035	0	0	170035
990	Prigen	Indonesia	Asia	South-Eastern Asia	-7.69053	112.635	1975	2030	11	8	FULL	0	0	0	0	0	9.9359	9.9359	9.9359	9.9359	0	0	9.9359	9.9359	9.9359	9.9359	0	0	0	0	0	0	0	0	0	0	0	0	0	0	0	71822.7	71822.7	71822.7	71822.7	68677.9	68677.9	68677.9	68677.9
991	Pringsewu	Indonesia	Asia	South-Eastern Asia	-5.35183	104.974	1975	2030	11	3	FULL	0	0	3	0	3	13.8972	0	0	13.8972	0	13.8972	17.8673	0	0	17.8673	0	17.8673	3.97017	0	0	3.97017	0	3.97017	0.360924	0	0	0.360924	0	0	27.2727	68767	0	0	68767	85393	0	0	85393
992	Probolinggo	Indonesia	Asia	South-Eastern Asia	-7.76385	113.207	1975	2030	11	9	FULL	0	8	8	8	3	68.6001	0	53.3701	68.6001	53.3701	15.23	116.329	0	98.1507	116.329	98.1507	18.1779	47.7285	0	44.7806	47.7285	44.7806	2.94791	4.33896	0	4.07096	4.33896	0	72.7273	27.2727	215500	0	169836	215500	435867	0	391573	435867
994	Puebla	Mexico	North America	Central America	19.0377	-98.2061	1975	2030	11	9	FULL	0	8	9	8	8	192.856	0	119.617	192.856	119.617	73.2389	372.786	0	212.543	372.786	212.543	160.243	179.931	0	92.9267	179.931	92.9267	87.0042	16.3574	0	8.44788	16.3574	0	72.7273	72.7273	569925	0	360851	569925	1.97614e+06	0	1.19692e+06	1.97614e+06
995	Puerto CortÃ©s	Honduras	North America	Central America	15.8431	-87.9351	2000	2030	6	1	PARTIAL	0	0	1	0	1	23.8488	0	0	23.8488	0	23.8488	28.8174	0	0	27.3132	0	27.3132	4.96856	0	0	3.46442	0	3.46442	0.828094	0	0	0.577403	0	0	16.6667	53595.1	0	0	53595.1	82000.6	0	0	82000.6
996	Puerto Francisco de Orellana	Ecuador	South America	South America	-0.451356	-76.9973	2020	2030	2	2	FULL	0	0	2	0	2	12.9181	0	0	12.9181	0	12.9181	16.8928	0	0	16.8928	0	16.8928	3.97471	0	0	3.97471	0	3.97471	1.98735	0	0	1.98735	0	0	100	61243.3	0	0	61243.3	92238.3	0	0	92238.3
998	Puerto Montt	Chile	South America	South America	-41.4688	-72.9421	1975	2030	11	9	FULL	0	4	6	4	6	14.9862	0	3.46386	14.9862	3.46386	11.5224	38.9643	0	11.4193	38.9643	11.4193	27.545	23.9781	0	7.95543	23.9781	7.95543	16.0227	2.17983	0	0.723221	2.17983	0	36.3636	54.5455	61846	0	11419.8	61846	247669	0	63212.8	247669
999	Puerto Vallarta	Mexico	North America	Central America	20.6474	-105.219	1990	2030	8	3	FULL	0	0	5	0	5	25.8499	0	0	25.8499	0	25.8499	44.7384	0	0	44.7384	0	44.7384	18.8885	0	0	18.8885	0	18.8885	2.36106	0	0	2.36106	0	0	62.5	82733.8	0	0	82733.8	177967	0	0	177967
1000	Puntarenas	Costa Rica	North America	Central America	9.98165	-84.7419	2025	2030	1	7	FULL	0	0	0	0	0	20.883	0	0	20.883	0	20.883	20.883	0	0	20.883	0	20.883	0	0	0	0	0	0	0	0	0	0	0	0	0	65405	0	0	65405	67298.6	0	0	67298.6
1001	Puray	Philippines	Asia	South-Eastern Asia	14.7743	121.241	2015	2030	3	3	FULL	0	0	0	0	0	1.98851	0	0	1.98851	0	1.98851	1.98851	0	0	1.98851	0	1.98851	0	0	0	0	0	0	0	0	0	0	0	0	0	58143.3	0	0	58143.3	85246.1	0	0	85246.1
1002	Purwakarta	Indonesia	Asia	South-Eastern Asia	-6.54921	107.443	1975	2030	11	11	FULL	0	7	11	7	11	29.8342	0	13.0248	29.8342	13.0248	16.8094	106.415	0	33.7857	106.415	33.7857	72.6296	76.5811	0	20.7609	76.5811	20.7609	55.8202	6.96192	0	1.88735	6.96192	0	63.6364	100	162381	0	79349.8	162381	507512	0	153466	507512
1003	Purwodadi	Indonesia	Asia	South-Eastern Asia	-7.08855	110.908	1975	2030	11	4	FULL	0	0	4	0	4	18.862	0	0	18.862	0	18.862	32.7591	0	0	32.7591	0	32.7591	13.8971	0	0	13.8971	0	13.8971	1.26337	0	0	1.26337	0	0	36.3636	201636	0	0	201636	144107	0	0	144107
1004	Purwokerto	Indonesia	Asia	South-Eastern Asia	-7.39391	109.279	1975	2030	11	4	FULL	1	8	8	8	0	171.897	3.62249	171.897	171.897	168.274	0	325.903	4.3664	325.903	325.903	321.536	0	154.006	0.743907	154.006	154.006	153.262	0	14.0005	0.0676279	14.0005	14.0005	9.09091	72.7273	0	1.13606e+06	10552.2	1.13606e+06	1.13606e+06	1.21582e+06	11554.3	1.21582e+06	1.21582e+06
1005	Purworejo	Indonesia	Asia	South-Eastern Asia	-7.71885	109.995	1975	2030	11	6	FULL	0	0	5	0	5	18.8685	0	0	18.8685	0	18.8685	28.7989	0	0	28.7989	0	28.7989	9.9304	0	0	9.9304	0	9.9304	0.902763	0	0	0.902763	0	0	45.4545	290096	0	0	290096	138152	0	0	138152
1006	Pyatigorsk	Russia	Europe	Eastern Europe	44.0339	43.0673	1975	2030	11	1	FULL	0	0	7	0	7	27.9877	0	0	27.9877	0	27.9877	45.9808	0	0	45.9808	0	45.9808	17.9931	0	0	17.9931	0	17.9931	1.63574	0	0	1.63574	0	0	63.6364	139167	0	0	139167	216564	0	0	216564
1007	Qa`mal	Yemen	Asia	Western Asia	17.0159	43.6721	2010	2030	4	1	FULL	0	0	3	0	3	10.9357	0	0	10.9357	0	10.9357	17.8941	0	0	17.8941	0	17.8941	6.95844	0	0	6.95844	0	6.95844	1.73961	0	0	1.73961	0	0	75	55937.1	0	0	55937.1	90187.4	0	0	90187.4
1008	Qa`tabah	Yemen	Asia	Western Asia	13.8514	44.7018	2010	2030	4	1	FULL	0	0	2	0	2	3.97325	0	0	3.97325	0	3.97325	5.96004	0	0	5.96004	0	5.96004	1.98679	0	0	1.98679	0	1.98679	0.496697	0	0	0.496697	0	0	50	50154.6	0	0	50154.6	54538.9	0	0	54538.9
1009	Qaem Shahr	Iran	Asia	Southern Asia	36.4685	52.8634	1980	2030	10	1	FULL	0	0	5	0	5	18.9615	0	0	18.9615	0	18.9615	32.9317	0	0	32.9317	0	32.9317	13.9702	0	0	13.9702	0	13.9702	1.39702	0	0	1.39702	0	0	50	56514.8	0	0	56514.8	169473	0	0	169473
1010	Qarchak	Iran	Asia	Southern Asia	35.3365	51.6397	1975	2030	11	1	FULL	0	0	7	0	7	14.9557	0	0	14.9557	0	14.9557	51.8466	0	0	51.8466	0	51.8466	36.8909	0	0	36.8909	0	36.8909	3.35372	0	0	3.35372	0	0	63.6364	78227	0	0	78227	353623	0	0	353623
1011	Qionghai	China	Asia	Eastern Asia	19.2426	110.463	1975	2030	11	1	FULL	0	0	7	0	7	8.94644	0	0	8.94644	0	8.94644	23.8576	0	0	23.8576	0	23.8576	14.9112	0	0	14.9112	0	14.9112	1.35556	0	0	1.35556	0	0	63.6364	109528	0	0	109528	147168	0	0	147168
1012	Quang NgÃ£i	Vietnam	Asia	South-Eastern Asia	15.1158	108.794	1980	2030	10	1	FULL	0	0	6	0	6	11.9377	0	0	11.9377	0	11.9377	85.552	0	0	85.552	0	85.552	73.6143	0	0	73.6143	0	73.6143	7.36143	0	0	7.36143	0	0	60	62997.9	0	0	62997.9	369447	0	0	369447
1014	Quetzaltenango	Guatemala	North America	Central America	14.846	-91.5228	1980	2030	10	9	FULL	8	8	8	6	0	23.8565	23.8565	23.8565	23.8565	0	0	85.4867	58.6989	85.4867	85.4867	26.7878	0	61.6302	34.8424	61.6302	61.6302	26.7878	0	6.16302	3.48424	6.16302	6.16302	80	60	0	58088.8	58088.8	58088.8	58088.8	312946	229956	312946	312946
1015	Quevedo	Ecuador	South America	South America	-1.02473	-79.4648	1975	2030	11	3	FULL	0	0	5	0	5	19.8654	0	0	19.8654	0	19.8654	32.7786	0	0	32.7786	0	32.7786	12.9132	0	0	12.9132	0	12.9132	1.17393	0	0	1.17393	0	0	45.4545	70308.5	0	0	70308.5	193181	0	0	193181
1016	Quezaltepeque	El Salvador	North America	Central America	13.8279	-89.2671	2000	2030	6	23	FULL	0	1	1	1	0	7.95806	1.02395	7.95806	7.95806	6.93411	0	8.95263	1.02392	8.95263	8.95263	7.92871	0	0.994568	0	0.994568	0.994568	0.994602	0	0.165761	0	0.165761	0.165761	0	16.6667	0	51977.1	625.469	51977.1	51977.1	58441.2	1333.08	58441.2	58441.2
1017	Quiha	Ethiopia	Africa	Eastern Africa	13.4757	39.538	1975	2030	11	1	FULL	0	0	6	0	6	4.96649	0	0	4.96649	0	4.96649	11.9197	0	0	11.9197	0	11.9197	6.95321	0	0	6.95321	0	6.95321	0.63211	0	0	0.63211	0	0	54.5455	64924.8	0	0	64924.8	266661	0	0	266661
1018	Quito	Ecuador	South America	South America	-0.16593	-78.4891	1975	2030	11	16	FULL	11	11	11	11	0	181.98	7.23279	181.98	181.98	174.747	0	383.846	64.8036	383.846	383.846	319.042	0	201.865	57.5709	201.865	201.865	144.295	0	18.3514	5.23371	18.3514	18.3514	100	100	0	635489	20388.7	635489	635489	2.79127e+06	445278	2.79127e+06	2.79127e+06
1019	Rada`	Yemen	Asia	Western Asia	14.4135	44.8382	2000	2030	6	1	FULL	0	6	6	6	0	8.94008	0	8.94008	8.94008	8.94008	0	19.867	0	19.867	19.867	19.867	0	10.9269	0	10.9269	10.9269	10.9269	0	1.82116	0	1.82116	1.82116	0	100	0	52026.6	0	52026.6	52026.6	163465	0	163465	163465
1021	Rancagua	Chile	South America	South America	-34.1684	-70.7326	1975	2030	11	5	FULL	0	0	7	0	7	22.9395	0	0	22.9395	0	22.9395	52.8598	0	0	52.8598	0	52.8598	29.9203	0	0	29.9203	0	29.9203	2.72003	0	0	2.72003	0	0	63.6364	88057.2	0	0	88057.2	281850	0	0	281850
1022	Rangkasbitung	Indonesia	Asia	South-Eastern Asia	-6.35556	106.253	1975	2030	11	7	FULL	0	9	9	9	0	13.9038	0	13.9038	13.9038	13.9038	0	61.5756	0	61.5756	61.5756	61.5756	0	47.6717	0	47.6717	47.6717	47.6717	0	4.33379	0	4.33379	4.33379	0	81.8182	0	207734	0	207734	207734	372323	0	372323	372323
1024	Reggio Calabria	Italy	Europe	Southern Europe	38.1088	15.6545	1975	2030	11	5	FULL	0	0	1	0	1	34.9184	0	0	34.9184	0	34.9184	36.914	0	0	36.914	0	36.914	1.99556	0	0	1.99556	0	1.99556	0.181415	0	0	0.181415	0	0	9.09091	123052	0	0	123052	128400	0	0	128400
1025	Rembang	Indonesia	Asia	South-Eastern Asia	-6.71462	111.339	1990	2030	8	1	PARTIAL	0	0	0	0	0	15.883	0	0	1.63003	0	1.63003	19.8543	0	0	1.64833	0	1.64833	3.97125	0	0	0	0	0	0.496407	0	0	0	0	0	0	82131.7	0	0	3302.74	81102.8	0	0	3037.46
1026	Reno	United States of America	North America	Northern America	39.5303	-119.777	1985	2030	9	1	FULL	0	0	6	0	6	45.9705	0	0	45.9705	0	45.9705	109.933	0	0	109.933	0	109.933	63.9621	0	0	63.9621	0	63.9621	7.1069	0	0	7.1069	0	0	66.6667	56370.3	0	0	56370.3	233395	0	0	233395
1027	Retalhuleu	Guatemala	North America	Central America	14.5352	-91.6808	2005	2030	5	9	FULL	0	2	2	2	0	9.93837	0	9.93229	9.93837	9.93229	0	12.9198	0	12.9137	12.9198	12.9137	0	2.98143	0	2.98143	2.98143	2.98143	0	0.596286	0	0.596286	0.596286	0	40	0	53449.2	0	53444	53449.2	67813.7	0	67807.6	67813.7
1028	Reykjavik	Iceland	Europe	Northern Europe	64.1335	-21.8909	1975	2030	11	11	FULL	0	7	7	7	0	43.1448	0	43.1448	43.1448	43.1448	0	97.327	0	97.327	97.327	97.327	0	54.1822	0	54.1822	54.1822	54.1822	0	4.92565	0	4.92565	4.92565	0	63.6364	0	72604.9	0	72604.9	72604.9	211224	0	211224	211224
1029	Rihab	Yemen	Asia	Western Asia	14.2257	44.1799	1995	2030	7	1	FULL	0	0	0	0	0	3.97403	0	0	3.97403	0	3.97403	3.97403	0	0	3.97403	0	3.97403	0	0	0	0	0	0	0	0	0	0	0	0	0	52391.2	0	0	52391.2	125246	0	0	125246
1030	RÃ­o Gallegos	Argentina	South America	South America	-51.6251	-69.2243	1995	2030	7	1	FULL	0	0	3	0	3	25.0186	0	0	25.0186	0	25.0186	29.0229	0	0	29.0229	0	29.0229	4.0043	0	0	4.0043	0	4.0043	0.572043	0	0	0.572043	0	0	42.8571	64474.3	0	0	64474.3	156461	0	0	156461
1031	Riobamba	Ecuador	South America	South America	-1.66689	-78.6499	1975	2030	11	5	FULL	0	6	6	6	0	21.8726	0	21.8726	21.8726	21.8726	0	34.7952	0	34.7952	34.7952	34.7952	0	12.9226	0	12.9226	12.9226	12.9226	0	1.17478	0	1.17478	1.17478	0	54.5455	0	85888.7	0	85888.7	85888.7	185474	0	185474	185474
1032	Robe	Ethiopia	Africa	Eastern Africa	7.86503	39.6317	1985	2030	9	7	FULL	0	0	3	0	3	4.96431	0	0	4.96431	0	4.96431	8.9359	0	0	8.9359	0	8.9359	3.97159	0	0	3.97159	0	3.97159	0.441288	0	0	0.441288	0	0	33.3333	53448.3	0	0	53448.3	77266.7	0	0	77266.7
1033	Rocky Point	Mexico	North America	Central America	31.3301	-113.526	2015	2030	3	1	FULL	0	0	1	0	1	19.9503	0	0	19.9503	0	19.9503	21.946	0	0	21.946	0	21.946	1.99568	0	0	1.99568	0	1.99568	0.665226	0	0	0.665226	0	0	33.3333	55675.6	0	0	55675.6	76277.8	0	0	76277.8
1034	Rome	Italy	Europe	Southern Europe	41.8843	12.5211	1975	2030	11	1	FULL	2	7	7	7	2	357.822	2.16793	313.738	357.822	311.57	44.0836	466.764	5.19487	403.687	466.764	398.492	63.0764	108.942	3.02694	89.9492	108.942	86.9222	18.9928	9.90382	0.275177	8.1772	9.90382	18.1818	63.6364	18.1818	1.95086e+06	6074.19	1.75183e+06	1.95086e+06	2.48792e+06	16934.1	2.20522e+06	2.48792e+06
1035	Rosales	Philippines	Asia	South-Eastern Asia	15.8957	120.62	2010	2030	4	1	FULL	0	0	4	0	4	20.8974	0	0	20.8974	0	20.8974	50.7487	0	0	50.7487	0	50.7487	29.8512	0	0	29.8512	0	29.8512	7.46281	0	0	7.46281	0	0	100	54008.7	0	0	54008.7	124341	0	0	124341
1036	Rosario	Philippines	Asia	South-Eastern Asia	13.8655	121.218	2020	2030	2	3	FULL	0	2	2	2	0	24.8532	0	23.5667	24.8532	23.5667	1.28643	42.7511	0	41.2076	42.7511	41.2076	1.5435	17.8979	0	17.6409	17.8979	17.6409	0	8.94897	0	8.82044	8.94897	0	100	0	66425.3	0	64910.8	66425.3	110368	0	107993	110368
1037	Rubavu	Rwanda	Africa	Eastern Africa	-1.67486	29.2691	1985	2030	9	6	FULL	0	8	8	8	0	25.8463	0	25.8463	25.8463	25.8463	0	74.5588	0	74.5588	74.5588	74.5588	0	48.7125	0	48.7125	48.7125	48.7125	0	5.4125	0	5.4125	5.4125	0	88.8889	0	62804.7	0	62804.7	62804.7	388695	0	388695	388695
1039	Rubaya	Dem. Rep. Congo	Africa	Middle Africa	-1.54401	28.8752	2000	2030	6	6	FULL	0	0	3	0	3	4.96793	0	0	4.96793	0	4.96793	9.93587	0	0	9.93587	0	9.93587	4.96794	0	0	4.96794	0	4.96794	0.82799	0	0	0.82799	0	0	50	55791.5	0	0	55791.5	157196	0	0	157196
1040	Ruteng	Indonesia	Asia	South-Eastern Asia	-8.61221	120.464	1975	2030	11	5	FULL	4	4	4	0	0	10.942	10.934	10.942	10.942	0	0	16.9099	16.6001	16.9099	16.9099	0	0	5.9679	5.66605	5.9679	5.9679	0	0	0.542537	0.515096	0.542537	0.542537	36.3636	0	0	70517.2	70517.2	70517.2	70517.2	123776	123305	123776	123776
1041	Rutshuru	Dem. Rep. Congo	Africa	Middle Africa	-1.15252	29.4303	1975	2030	11	6	FULL	0	3	4	3	3	6.96015	0	0	6.96015	0	6.96015	21.8752	0	9.19203	21.8752	9.19203	12.6831	14.915	0	9.19203	14.915	9.19203	5.723	1.35591	0	0.835639	1.35591	0	27.2727	27.2727	55297.1	0	0	55297.1	204700	0	70455.4	204700
1042	Rutshuru	Dem. Rep. Congo	Africa	Middle Africa	-0.883303	29.567	2025	2030	1	9	FULL	0	0	0	0	0	6.96175	0	0	6.96175	0	6.96175	6.96175	0	0	6.96175	0	6.96175	0	0	0	0	0	0	0	0	0	0	0	0	0	52003.3	0	0	52003.3	55835.7	0	0	55835.7
1043	Sa`dah	Yemen	Asia	Western Asia	16.936	43.7571	2000	2030	6	1	PARTIAL	0	0	4	0	4	5.96436	0	0	3.75982	0	3.75982	33.7996	0	0	29.3903	0	29.3903	27.8352	0	0	25.6305	0	25.6305	4.6392	0	0	4.27175	0	0	66.6667	51235.1	0	0	29925.4	158427	0	0	120795
1044	Sabya	Saudi Arabia	Asia	Western Asia	17.1529	42.6371	1980	2030	10	1	FULL	0	2	2	2	0	9.95239	0	9.95239	9.95239	9.95239	0	10.9473	0	10.9473	10.9473	10.9473	0	0.994927	0	0.994927	0.994927	0.994927	0	0.0994927	0	0.0994927	0.0994927	0	20	0	50182.9	0	50182.9	50182.9	64777.2	0	64777.2	64777.2
1045	Saga	Japan	Asia	Eastern Asia	33.2584	130.29	1980	2030	10	4	FULL	0	0	6	0	6	22.9279	0	0	22.9279	0	22.9279	37.8789	0	0	37.8789	0	37.8789	14.951	0	0	14.951	0	14.951	1.4951	0	0	1.4951	0	0	60	54058.3	0	0	54058.3	117551	0	0	117551
1046	Saint-AndrÃ©	RÃ©union	Europe	Western Europe	-20.947	55.6574	2010	2030	4	1	FULL	0	0	0	0	0	23.8725	0	0.818332	23.8725	0.818332	23.0542	23.8725	0	0.818332	23.8725	0.818332	23.0542	0	0	0	0	0	0	0	0	0	0	0	0	0	56224.2	0	1179.29	56224.2	62075.8	0	1197.41	62075.8
1047	Saint-Denis	RÃ©union	Europe	Western Europe	-20.8895	55.4679	1975	2030	11	1	FULL	0	0	10	0	10	18.9015	0	0	18.9015	0	18.9015	59.6896	0	0	59.6896	0	59.6896	40.7881	0	0	40.7881	0	40.7881	3.70801	0	0	3.70801	0	0	90.9091	101668	0	0	101668	197483	0	0	197483
1049	Sake	Dem. Rep. Congo	Africa	Middle Africa	-1.57313	29.057	1975	2030	11	6	FULL	0	4	4	4	0	6.95666	0	6.95666	6.95666	6.95666	0	9.93815	0	9.93815	9.93815	9.93815	0	2.98148	0	2.98148	2.98148	2.98148	0	0.271044	0	0.271044	0.271044	0	36.3636	0	100909	0	100909	100909	80855.5	0	80855.5	80855.5
1050	Salamanca	Mexico	North America	Central America	20.5719	-101.197	1975	2030	11	1	PARTIAL	0	0	4	0	4	20.9049	0	0	15.7341	0	15.7341	32.8499	0	0	25.082	0	25.082	11.945	0	0	9.34783	0	9.34783	1.08591	0	0	0.849802	0	0	36.3636	65467.6	0	0	58313.7	185472	0	0	162256
1051	Salatiga	Indonesia	Asia	South-Eastern Asia	-7.33377	110.501	1975	2030	11	6	FULL	1	9	9	9	0	20.8507	0	20.8507	20.8507	20.8507	0	50.6348	1.7717	50.6348	50.6348	48.8631	0	29.7841	1.7717	29.7841	29.7841	28.0124	0	2.70764	0.161064	2.70764	2.70764	9.09091	81.8182	0	129327	0	129327	129327	254753	5819.34	254753	254753
1052	Salem	United States of America	North America	Northern America	44.9575	-123.004	1975	2030	11	2	PARTIAL	0	0	5	0	5	45.9626	0	0	20.6324	0	20.6324	114.906	0	0	44.5892	0	44.5892	68.943	0	0	23.9568	0	23.9568	6.26755	0	0	2.17789	0	0	45.4545	61955.6	0	0	32472.3	242220	0	0	102777
1053	Salerno	Italy	Europe	Southern Europe	40.6747	14.771	1975	2030	11	3	FULL	0	0	2	0	2	27.9486	0	0.74131	27.9486	0.74131	27.2073	29.945	0	0.74131	29.945	0.74131	29.2037	1.99639	0	0	1.99639	0	1.99639	0.18149	0	0	0.18149	0	0	18.1818	119699	0	1053.13	119699	129322	0	1138.07	129322
1054	Salihli	Turkey	Asia	Western Asia	38.4832	28.1463	1975	2030	11	1	FULL	0	0	1	0	1	8.98072	0	0	8.98072	0	8.98072	9.97867	0	0	9.97867	0	9.97867	0.997946	0	0	0.997946	0	0.997946	0.0907224	0	0	0.0907224	0	0	9.09091	50473.8	0	0	50473.8	128702	0	0	128702
1055	Samitah	Saudi Arabia	Asia	Western Asia	16.5911	42.9325	1985	2030	9	1	FULL	0	0	2	0	2	8.95319	0	0	8.95319	0	8.95319	10.9426	0	0	10.9426	0	10.9426	1.98945	0	0	1.98945	0	1.98945	0.22105	0	0	0.22105	0	0	22.2222	59725.4	0	0	59725.4	65542.5	0	0	65542.5
1056	Sampang	Indonesia	Asia	South-Eastern Asia	-7.20126	113.243	1975	2030	11	5	FULL	0	0	6	0	6	17.8968	0	0	17.8968	0	17.8968	25.8504	0	0	25.8504	0	25.8504	7.95358	0	0	7.95358	0	7.95358	0.723053	0	0	0.723053	0	0	54.5455	184687	0	0	184687	93140.1	0	0	93140.1
1057	San AndrÃ©s Tuxtla	Mexico	North America	Central America	18.4467	-95.2133	2000	2030	6	1	FULL	0	3	3	3	0	9.95209	0	9.95209	9.95209	9.95209	0	15.9233	0	15.9233	15.9233	15.9233	0	5.97122	0	5.97122	5.97122	5.97122	0	0.995203	0	0.995203	0.995203	0	50	0	50324.3	0	50324.3	50324.3	80052.3	0	80052.3	80052.3
1058	San Carlos	Philippines	Asia	South-Eastern Asia	10.4859	123.417	2005	2030	5	1	FULL	0	0	3	0	3	11.9167	0	0	11.9167	0	11.9167	14.8947	0	0	14.8947	0	14.8947	2.97797	0	0	2.97797	0	2.97797	0.595594	0	0	0.595594	0	0	60	54014.9	0	0	54014.9	58391.7	0	0	58391.7
1059	San Carlos	Philippines	Asia	South-Eastern Asia	15.9195	120.349	2015	2030	3	1	FULL	0	0	1	0	1	21.9009	0	0	21.9009	0	21.9009	50.7701	0	0	50.7701	0	50.7701	28.8692	0	0	28.8692	0	28.8692	9.62307	0	0	9.62307	0	0	33.3333	59352	0	0	59352	125973	0	0	125973
1060	San Carlos de Bariloche	Argentina	South America	South America	-41.1497	-71.3056	1985	2030	9	6	FULL	0	0	4	0	4	18.9854	0	0	18.9854	0	18.9854	23.98	0	0	23.98	0	23.98	4.99458	0	0	4.99458	0	4.99458	0.554954	0	0	0.554954	0	0	44.4444	54355.6	0	0	54355.6	119455	0	0	119455
1061	San CristÃ³bal de las Casas	Mexico	North America	Central America	16.7338	-92.6403	1975	2030	11	1	FULL	0	0	4	0	4	23.8486	0	0	23.8486	0	23.8486	35.771	0	0	35.771	0	35.771	11.9224	0	0	11.9224	0	11.9224	1.08386	0	0	1.08386	0	0	36.3636	80527	0	0	80527	222069	0	0	222069
1062	San Fernando	Chile	South America	South America	-34.5864	-70.9887	2020	2030	2	5	FULL	0	0	0	0	0	14.9645	0	0	14.9645	0	14.9645	14.9645	0	0	14.9645	0	14.9645	0	0	0	0	0	0	0	0	0	0	0	0	0	53318.2	0	0	53318.2	52321.7	0	0	52321.7
1063	San Giuseppe Vesuviano	Italy	Europe	Southern Europe	40.8349	14.4956	2005	2030	5	3	FULL	1	1	1	1	0	17.9693	17.9693	17.9693	17.9693	0	0	28.9497	25.0545	28.9497	28.9497	3.89518	0	10.9804	7.08523	10.9804	10.9804	3.89518	0	2.19608	1.41705	2.19608	2.19608	20	20	0	54738.5	54738.5	54738.5	54738.5	78420.5	69392.8	78420.5	78420.5
1064	San Jose	Philippines	Asia	South-Eastern Asia	15.7952	120.984	2005	2030	5	1	PARTIAL	0	0	2	0	2	12.9304	0	0	5.36134	0	5.36134	21.8814	0	0	7.35385	0	7.35385	8.95099	0	0	1.99251	0	1.99251	1.7902	0	0	0.398502	0	0	40	56182.9	0	0	24579.4	105672	0	0	41953.2
1065	San JosÃ©	Costa Rica	North America	Central America	9.9372	-84.0825	1975	2030	11	6	FULL	1	11	11	11	1	212.029	0	211.216	212.029	211.216	0.812788	491.71	1.40191	489.94	491.71	488.539	1.76905	279.681	1.40191	278.725	279.681	277.323	0.956259	25.4255	0.127447	25.3386	25.4255	9.09091	100	9.09091	623036	0	622150	623036	2336105	3021.27	2.32823e+06	2336105
1066	San Juan del RÃ­o	Mexico	North America	Central America	20.3884	-99.9763	1980	2030	10	1	FULL	0	0	7	0	7	23.8651	0	0	23.8651	0	23.8651	37.7871	0	0	37.7871	0	37.7871	13.9219	0	0	13.9219	0	13.9219	1.39219	0	0	1.39219	0	0	70	57137.2	0	0	57137.2	202464	0	0	202464
1067	San Juan SacatepÃ©quez	Guatemala	North America	Central America	14.7231	-90.653	1990	2030	8	16	FULL	0	4	5	4	3	7.95966	0	2.96265	7.95966	2.96265	4.99702	32.8326	0	24.9427	32.8326	24.9427	7.88989	24.8729	0	21.98	24.8729	21.98	2.89288	3.10911	0	2.7475	3.10911	0	50	37.5	52565.9	0	21163.1	52565.9	120727	0	79381.1	120727
1068	San Luis RÃ­o Colorado	Mexico	North America	Central America	32.4513	-114.757	1980	2030	10	1	FULL	0	0	6	0	6	32.9163	0	0	32.9163	0	32.9163	54.8589	0	0	54.8589	0	54.8589	21.9426	0	0	21.9426	0	21.9426	2.19426	0	0	2.19426	0	0	60	63860.7	0	0	63860.7	212304	0	0	212304
1069	San Miguel	El Salvador	North America	Central America	13.4806	-88.1802	1975	2030	11	13	FULL	2	3	3	3	0	19.8724	12.7021	19.8724	19.8724	7.17034	0	31.7964	20.6696	31.7964	31.7964	11.1268	0	11.9239	7.96749	11.9239	11.9239	3.95644	0	1.08399	0.724318	1.08399	1.08399	18.1818	27.2727	0	121968	79177.7	121968	121968	164558	105091	164558	164558
1070	San Pablo	Philippines	Asia	South-Eastern Asia	14.0707	121.325	1990	2030	8	3	FULL	6	6	6	1	0	17.8952	17.8952	17.8952	17.8952	0	0	73.5642	67.4149	73.5642	73.5642	6.14929	0	55.669	49.5197	55.669	55.669	6.14929	0	6.95863	6.18997	6.95863	6.95863	75	12.5	0	63526.8	63526.8	63526.8	63526.8	332668	311033	332668	332668
1071	San Pedro SacatepÃ©quez [San Marcos]	Guatemala	North America	Central America	14.9628	-91.8019	2000	2030	6	6	FULL	0	4	4	4	0	19.8763	0	19.8763	19.8763	19.8763	0	35.7762	0	35.7762	35.7762	35.7762	0	15.8999	0	15.8999	15.8999	15.8999	0	2.64999	0	2.64999	2.64999	0	66.6667	0	61487.3	0	61487.3	61487.3	123142	0	123142	123142
1072	San Pedro Soloma	Guatemala	North America	Central America	15.6744	-91.428	2020	2030	2	4	FULL	0	0	1	0	1	10.9365	0	0	10.9365	0	10.9365	12.9242	0	0	12.9242	0	12.9242	1.98768	0	0	1.98768	0	1.98768	0.993841	0	0	0.993841	0	0	50	51758.7	0	0	51758.7	59124.4	0	0	59124.4
1073	San Pedro Sula	Honduras	North America	Central America	15.5083	-88.0242	1975	2030	11	1	FULL	0	0	11	0	11	37.7617	0	0	37.7617	0	37.7617	217.629	0	0	217.629	0	217.629	179.867	0	0	179.867	0	179.867	16.3515	0	0	16.3515	0	0	100	185463	0	0	185463	1.35378e+06	0	0	1.35378e+06
1074	San Salvador	El Salvador	North America	Central America	13.6994	-89.1886	1975	2030	11	25	FULL	10	11	11	10	0	147.206	76.0705	147.206	147.206	71.1358	0	269.544	121.107	269.544	269.544	148.437	0	122.338	45.0367	122.338	122.338	77.3011	0	11.1216	4.09425	11.1216	11.1216	90.9091	90.9091	0	974923	441061	974923	974923	1.66667e+06	821543	1.66667e+06	1.66667e+06
1075	Sana'a	Yemen	Asia	Western Asia	15.3373	44.2091	1975	2030	11	3	FULL	0	11	11	11	9	76.5099	0	27.438	76.5099	27.438	49.0719	218.599	0	130.299	218.599	130.299	88.2998	142.089	0	102.861	142.089	102.861	39.2279	12.9172	0	9.35099	12.9172	0	100	81.8182	153998	0	59901.4	153998	4.34745e+06	0	2.48281e+06	4.34745e+06
1076	Sanjo	Japan	Asia	Eastern Asia	37.6281	138.958	1975	2030	11	5	FULL	0	0	5	0	5	20.9638	0	0	20.9638	0	20.9638	36.9361	0	0	36.9361	0	36.9361	15.9723	0	0	15.9723	0	15.9723	1.45202	0	0	1.45202	0	0	45.4545	81088.2	0	0	81088.2	87204.5	0	0	87204.5
1078	Sant Andreu de la Barca	Spain	Europe	Southern Europe	41.4376	1.96017	2020	2030	2	1	FULL	0	0	0	0	0	18.9718	0	0	18.9718	0	18.9718	18.9718	0	0	18.9718	0	18.9718	0	0	0	0	0	0	0	0	0	0	0	0	0	53982	0	0	53982	55956.1	0	0	55956.1
1079	Sant Boi de Llobregat	Spain	Europe	Southern Europe	41.3266	2.0227	1975	2030	11	1	PARTIAL	0	0	1	0	1	18.9714	0	0	1.9931	0	1.9931	26.9595	0	0	5.14688	0	5.14688	7.98807	0	0	3.15378	0	3.15378	0.726189	0	0	0.286707	0	0	9.09091	129361	0	0	7052.36	214040	0	0	18659.8
1080	Sant VicenÃ§ dels Horts	Spain	Europe	Southern Europe	41.4041	2.00856	2005	2030	5	1	FULL	0	0	2	0	2	12.9809	0	0	12.9809	0	12.9809	14.9777	0	0	14.9777	0	14.9777	1.99683	0	0	1.99683	0	1.99683	0.399367	0	0	0.399367	0	0	40	50202.8	0	0	50202.8	66447.5	0	0	66447.5
1081	Santa Ana	El Salvador	North America	Central America	13.9847	-89.5555	1975	2030	11	22	FULL	4	6	6	5	0	21.8925	4.43537	21.8925	21.8925	17.4571	0	36.8211	13.3205	36.8211	36.8211	23.5006	0	14.9286	8.8851	14.9286	14.9286	6.04347	0	1.35714	0.807737	1.35714	1.35714	36.3636	45.4545	0	189692	32566.9	189692	189692	191427	47628.3	191427	191427
1082	Santa Cruz	Philippines	Asia	South-Eastern Asia	14.2658	121.396	1990	2030	8	3	FULL	0	6	6	6	0	29.8213	0	29.8213	29.8213	29.8213	0	63.619	0	63.619	63.619	63.619	0	33.7978	0	33.7978	33.7978	33.7978	0	4.22472	0	4.22472	4.22472	0	75	0	69584.9	0	69584.9	69584.9	269138	0	269138	269138
1085	Santa Cruz de Tenerife	Spain	Europe	Southern Europe	28.4511	-16.2884	1975	2030	11	2	FULL	0	0	4	0	4	49.7969	0	0	49.7969	0	49.7969	58.7599	0	0	58.7599	0	58.7599	8.963	0	0	8.963	0	8.963	0.814818	0	0	0.814818	0	0	36.3636	234920	0	0	234920	367658	0	0	367658
1086	Santa Cruz del QuichÃ©	Guatemala	North America	Central America	15.0325	-91.145	2005	2030	5	9	FULL	0	0	1	0	1	7.9553	0	0	7.9553	0	7.9553	13.9218	0	0	13.9218	0	13.9218	5.96651	0	0	5.96651	0	5.96651	1.1933	0	0	1.1933	0	0	20	50815.5	0	0	50815.5	90375.3	0	0	90375.3
1087	Santa LucÃ­a Cotzumalguapa	Guatemala	North America	Central America	14.3374	-91.0228	1985	2030	9	11	FULL	0	4	4	4	0	6.96125	0	6.96125	6.96125	6.96125	0	14.9166	0	14.9166	14.9166	14.9166	0	7.95532	0	7.95532	7.95532	7.95532	0	0.883924	0	0.883924	0.883924	0	44.4444	0	52059.4	0	52059.4	52059.4	116049	0	116049	116049
1088	Santa Matilde	Mexico	North America	Central America	20.0573	-98.7803	2005	2030	5	1	PARTIAL	0	0	3	0	3	11.9291	0	0	11.3988	0	11.3988	27.8344	0	0	27.3041	0	27.3041	15.9054	0	0	15.9054	0	15.9054	3.18107	0	0	3.18107	0	0	60	53993.5	0	0	53187.6	106128	0	0	105405
1089	Santa Rosa	United States of America	North America	Northern America	38.4456	-122.725	1985	2030	9	1	FULL	0	0	5	0	5	37.9118	0	0	37.9118	0	37.9118	61.8565	0	0	61.8565	0	61.8565	23.9446	0	0	23.9446	0	23.9446	2.66051	0	0	2.66051	0	0	55.5556	55644.1	0	0	55644.1	151531	0	0	151531
1090	Santa Rosa	Honduras	North America	Central America	14.7733	-88.7775	2015	2030	3	3	FULL	0	0	0	0	0	7.95433	0	0	7.95433	0	7.95433	7.95433	0	0	7.95433	0	7.95433	0	0	0	0	0	0	0	0	0	0	0	0	0	56349.7	0	0	56349.7	56640	0	0	56640
1091	Santa Rosa de Cabal	Colombia	South America	South America	4.87148	-75.6233	2005	2030	5	6	FULL	0	0	0	0	0	8.93447	0	6.85538	8.93447	6.85538	2.07909	8.93447	0	6.85538	8.93447	6.85538	2.07909	0	0	0	0	0	0	0	0	0	0	0	0	0	51939.4	0	47106.1	51939.4	55487.2	0	49504.1	55487.2
1092	Santander de Quilichao	Colombia	South America	South America	3.00741	-76.4841	2005	2030	5	3	FULL	0	0	0	0	0	6.95224	0	0	6.95224	0	6.95224	6.95224	0	0	6.95224	0	6.95224	0	0	0	0	0	0	0	0	0	0	0	0	0	54137.8	0	0	54137.8	59574.3	0	0	59574.3
1093	Santiago	Chile	South America	South America	-33.4812	-70.6482	1975	2030	11	3	FULL	0	0	11	0	11	505.552	0	0	505.552	0	505.552	810.681	0	0	810.681	0	810.681	305.129	0	0	305.129	0	305.129	27.739	0	0	27.739	0	0	100	2826460	0	0	2826460	6.73341e+06	0	0	6.73341e+06
1094	Santo Domingo de los Tsachilas	Ecuador	South America	South America	-0.258438	-79.1782	1985	2030	9	7	FULL	0	0	6	0	6	21.8579	0	0	21.8579	0	21.8579	55.6372	0	0	55.6372	0	55.6372	33.7792	0	0	33.7792	0	33.7792	3.75325	0	0	3.75325	0	0	66.6667	73189.5	0	0	73189.5	362722	0	0	362722
1095	Santo Tomas	Philippines	Asia	South-Eastern Asia	7.5183	125.616	2025	2030	1	2	FULL	0	0	0	0	0	12.9324	0	0	12.9324	0	12.9324	12.9324	0	0	12.9324	0	12.9324	0	0	0	0	0	0	0	0	0	0	0	0	0	56207.5	0	0	56207.5	63741.6	0	0	63741.6
1096	Sapporo	Japan	Asia	Eastern Asia	43.071	141.369	1975	2030	11	6	FULL	0	0	8	0	8	295.63	0	0	295.63	0	295.63	352.564	0	0	352.564	0	352.564	56.9343	0	0	56.9343	0	56.9343	5.17585	0	0	5.17585	0	0	72.7273	1.50617e+06	0	0	1.50617e+06	1.85692e+06	0	0	1.85692e+06
1097	Sariaya	Philippines	Asia	South-Eastern Asia	13.9311	121.418	2005	2030	5	3	FULL	0	4	4	4	0	9.94088	0	9.94088	9.94088	9.94088	0	88.4683	0	88.4683	88.4683	88.4683	0	78.5274	0	78.5274	78.5274	78.5274	0	15.7055	0	15.7055	15.7055	0	80	0	52820.9	0	52820.9	52820.9	262783	0	262783	262783
1098	Sasebo	Japan	Asia	Eastern Asia	33.1665	129.734	1975	2030	11	2	FULL	0	0	2	0	2	31.8917	0	0	31.8917	0	31.8917	40.862	0	0	40.862	0	40.862	8.97032	0	0	8.97032	0	8.97032	0.815483	0	0	0.815483	0	0	18.1818	91875	0	0	91875	131398	0	0	131398
1100	Seattle	United States of America	North America	Northern America	47.6086	-122.334	1975	2030	11	3	PARTIAL	0	0	11	0	11	295.958	0	0	217.796	0	217.796	1143.86	0	0	1037.72	0	1037.72	847.9	0	0	819.921	0	819.921	77.0818	0	0	74.5383	0	0	100	371903	0	0	269908	2.20476e+06	0	0	1.95152e+06
1102	Selong	Indonesia	Asia	South-Eastern Asia	-8.64046	116.505	1975	2030	11	1	FULL	0	11	11	11	4	26.808	0	25.9077	26.808	25.9077	0.900294	147.94	0	135.289	147.94	135.289	12.6511	121.132	0	109.381	121.132	109.381	11.7509	11.012	0	9.94374	11.012	0	100	36.3636	153812	0	153166	153812	537275	0	517726	537275
1103	Semarang	Indonesia	Asia	South-Eastern Asia	-7.02242	110.369	1975	2030	11	7	FULL	0	5	9	5	9	320.688	0	32.6182	320.688	32.6182	288.07	588.753	0	29.5074	588.753	29.5074	559.245	268.065	0	-3.11086	268.065	-3.11086	271.176	24.3695	0	-0.282805	24.3695	0	45.4545	81.8182	1.60478e+06	0	103586	1.60478e+06	3386112	0	100447	3386112
1104	Semarapura	Indonesia	Asia	South-Eastern Asia	-8.54308	115.408	1985	2030	9	3	FULL	0	2	2	2	0	12.9163	0	12.9163	12.9163	12.9163	0	17.8847	0	17.8847	17.8847	17.8847	0	4.96837	0	4.96837	4.96837	4.96837	0	0.552041	0	0.552041	0.552041	0	22.2222	0	56432.3	0	56432.3	56432.3	92658.6	0	92658.6	92658.6
1106	Sendai	Japan	Asia	Eastern Asia	38.2725	140.923	1975	2030	11	7	FULL	0	0	9	0	9	230.451	0	0	230.451	0	230.451	297.295	0	0	297.295	0	297.295	66.8445	0	0	66.8445	0	66.8445	6.07677	0	0	6.07677	0	0	81.8182	783088	0	0	783088	1.24105e+06	0	0	1.24105e+06
1107	Seoul	South Korea	Asia	Eastern Asia	37.4896	126.921	1975	2030	11	1	PARTIAL	0	0	11	0	11	981.31	0	0	496.819	0	496.819	2282.05	0	0	1029.41	0	1029.41	1300.74	0	0	532.593	0	532.593	118.249	0	0	48.4176	0	0	100	10122208	0	0	6.81979e+06	22221400	0	0	11499358
1108	Serang	Indonesia	Asia	South-Eastern Asia	-6.02862	106.309	2025	2030	1	6	FULL	0	0	1	0	1	20.8567	0	0	20.8567	0	20.8567	31.7822	0	0	31.7822	0	31.7822	10.9255	0	0	10.9255	0	10.9255	10.9255	0	0	10.9255	0	0	100	51954.7	0	0	51954.7	69853.2	0	0	69853.2
1109	Seririt	Indonesia	Asia	South-Eastern Asia	-8.1933	114.943	1995	2030	7	6	FULL	0	3	3	3	0	16.8986	0	16.8986	16.8986	16.8986	0	24.8499	0	24.8499	24.8499	24.8499	0	7.9513	0	7.9513	7.9513	7.9513	0	1.1359	0	1.1359	1.1359	0	42.8571	0	56757.4	0	56757.4	56757.4	80473.6	0	80473.6	80473.6
1113	Shangdu	China	Asia	Eastern Asia	41.558	113.541	1975	2030	11	1	FULL	0	0	6	0	6	6.99664	0	0	6.99664	0	6.99664	14.9924	0	0	14.9924	0	14.9924	7.99573	0	0	7.99573	0	7.99573	0.726885	0	0	0.726885	0	0	54.5455	82074.7	0	0	82074.7	59328.7	0	0	59328.7
1114	Shashamane	Ethiopia	Africa	Eastern Africa	7.20421	38.5982	1980	2030	10	8	FULL	0	7	7	7	0	21.8409	0	21.8409	21.8409	21.8409	0	40.7031	0	40.7031	40.7031	40.7031	0	18.8622	0	18.8622	18.8622	18.8622	0	1.88622	0	1.88622	1.88622	0	70	0	78910.1	0	78910.1	78910.1	479480	0	479480	479480
1115	Shi`b al Ghayl	Yemen	Asia	Western Asia	14.3706	43.5645	1995	2030	7	1	FULL	0	0	0	0	0	4.96946	0	0	4.96946	0	4.96946	4.96946	0	0	4.96946	0	4.96946	0	0	0	0	0	0	0	0	0	0	0	0	0	51861.4	0	0	51861.4	100210	0	0	100210
1116	Shibata	Japan	Asia	Eastern Asia	38.0575	140.764	2015	2030	3	7	FULL	0	0	0	0	0	24.9381	0	12.172	24.9381	12.172	12.766	24.9381	0	12.172	24.9381	12.172	12.766	0	0	0	0	0	0	0	0	0	0	0	0	0	56024.6	0	28558.6	56024.6	56076.1	0	28564.7	56076.1
1117	Shinshicho	Ethiopia	Africa	Eastern Africa	7.20531	37.7806	1985	2030	9	4	FULL	0	0	3	0	3	3.97266	0	0	3.97266	0	3.97266	8.93844	0	0	8.93844	0	8.93844	4.96578	0	0	4.96578	0	4.96578	0.551753	0	0	0.551753	0	0	33.3333	52146.6	0	0	52146.6	76314	0	0	76314
1118	Shiren	China	Asia	Eastern Asia	41.9586	126.57	2020	2030	2	1	FULL	0	0	1	0	1	7.99512	0	0	7.99512	0	7.99512	9.9934	0	0	9.9934	0	9.9934	1.99828	0	0	1.99828	0	1.99828	0.999142	0	0	0.999142	0	0	50	51101.6	0	0	51101.6	67714.9	0	0	67714.9
1119	Shizuoka	Japan	Asia	Eastern Asia	34.9889	138.434	1975	2030	11	6	FULL	0	0	6	0	6	127.775	0	0	127.775	0	127.775	139.756	0	0	139.756	0	139.756	11.9806	0	0	11.9806	0	11.9806	1.08915	0	0	1.08915	0	0	54.5455	392662	0	0	392662	152219	0	0	152219
1120	Shoa Robit	Ethiopia	Africa	Eastern Africa	9.9956	39.8968	2000	2030	6	5	FULL	0	0	3	0	3	5.95889	0	0	5.95889	0	5.95889	15.8901	0	0	15.8901	0	15.8901	9.93122	0	0	9.93122	0	9.93122	1.6552	0	0	1.6552	0	0	50	51606.7	0	0	51606.7	83632.4	0	0	83632.4
1121	Shone	Ethiopia	Africa	Eastern Africa	7.13839	37.9551	1975	2030	11	4	FULL	0	4	4	4	0	3.97212	0	3.97212	3.97212	3.97212	0	8.93749	0	8.93749	8.93749	8.93749	0	4.96537	0	4.96537	4.96537	4.96537	0	0.451397	0	0.451397	0.451397	0	36.3636	0	51751.1	0	51751.1	51751.1	91065.9	0	91065.9	91065.9
1122	Showt	Iran	Asia	Southern Asia	39.2191	44.771	2000	2030	6	3	FULL	0	0	0	0	0	6.9849	0	0	6.9849	0	6.9849	6.9849	0	0	6.9849	0	6.9849	0	0	0	0	0	0	0	0	0	0	0	0	0	56052.8	0	0	56052.8	90785.8	0	0	90785.8
1123	Shufune	Ethiopia	Africa	Eastern Africa	9.15807	38.7549	2010	2030	4	2	FULL	0	0	3	0	3	14.8933	0	0	14.8933	0	14.8933	25.8151	0	0	25.8151	0	25.8151	10.9217	0	0	10.9217	0	10.9217	2.73044	0	0	2.73044	0	0	75	81389.7	0	0	81389.7	151252	0	0	151252
1124	Shunan	Japan	Asia	Eastern Asia	34.041	131.814	1975	2030	11	2	FULL	0	0	1	0	1	67.8878	0	0	67.8878	0	67.8878	68.8852	0	0	68.8852	0	68.8852	0.997355	0	0	0.997355	0	0.997355	0.0906687	0	0	0.0906687	0	0	9.09091	207989	0	0	207989	144214	0	0	144214
1125	Sibolga	Indonesia	Asia	South-Eastern Asia	1.73423	98.7863	1975	2030	11	1	FULL	0	0	2	0	2	11.9103	0	0	11.9103	0	11.9103	15.8805	0	0	15.8805	0	15.8805	3.97019	0	0	3.97019	0	3.97019	0.360927	0	0	0.360927	0	0	18.1818	52930.3	0	0	52930.3	70936	0	0	70936
1128	Sidama	Ethiopia	Africa	Eastern Africa	6.94636	38.5862	2025	2030	1	5	FULL	0	0	1	0	1	39.71	0	0	39.71	0	39.71	47.6522	0	0	47.6522	0	47.6522	7.94214	0	0	7.94214	0	7.94214	7.94214	0	0	7.94214	0	0	100	79944.1	0	0	79944.1	96267.1	0	0	96267.1
1129	Sidiangkat	Indonesia	Asia	South-Eastern Asia	2.74779	98.3149	1975	2030	11	3	FULL	0	0	3	0	3	9.92682	0	0	9.92682	0	9.92682	12.9049	0	0	12.9049	0	12.9049	2.97809	0	0	2.97809	0	2.97809	0.270736	0	0	0.270736	0	0	27.2727	92608.2	0	0	92608.2	66717.7	0	0	66717.7
1130	Sigli	Indonesia	Asia	South-Eastern Asia	5.37648	95.9545	1975	2030	11	1	FULL	0	0	1	0	1	19.9055	0	0	19.9055	0	19.9055	20.9006	0	0	20.9006	0	20.9006	0.995052	0	0	0.995052	0	0.995052	0.0904593	0	0	0.0904593	0	0	9.09091	99050.7	0	0	99050.7	64375	0	0	64375
1131	Siguatepeque	Honduras	North America	Central America	14.5941	-87.8376	2010	2030	4	1	FULL	0	0	1	0	1	13.9098	0	0	13.9098	0	13.9098	15.8969	0	0	15.8969	0	15.8969	1.98717	0	0	1.98717	0	1.98717	0.496792	0	0	0.496792	0	0	25	57578.9	0	0	57578.9	86627.2	0	0	86627.2
1132	Siirt	Turkey	Asia	Western Asia	37.9299	41.9381	1990	2030	8	1	FULL	0	0	4	0	4	8.99337	0	0	8.99337	0	8.99337	14.9881	0	0	14.9881	0	14.9881	5.99475	0	0	5.99475	0	5.99475	0.749344	0	0	0.749344	0	0	50	58515.4	0	0	58515.4	173626	0	0	173626
1133	Silay	Philippines	Asia	South-Eastern Asia	10.7923	122.972	1995	2030	7	1	FULL	0	0	2	0	2	8.93643	0	0	8.93643	0	8.93643	11.9161	0	0	11.9161	0	11.9161	2.97967	0	0	2.97967	0	2.97967	0.425668	0	0	0.425668	0	0	28.5714	52346	0	0	52346	69308.1	0	0	69308.1
1136	Singaraja	Indonesia	Asia	South-Eastern Asia	-8.11791	115.085	1975	2030	11	5	FULL	0	8	8	8	0	19.8771	0	19.8771	19.8771	19.8771	0	73.5457	0	73.5457	73.5457	73.5457	0	53.6685	0	53.6685	53.6685	53.6685	0	4.87896	0	4.87896	4.87896	0	72.7273	0	131377	0	131377	131377	288505	0	288505	288505
1137	Situbondo	Indonesia	Asia	South-Eastern Asia	-7.7023	113.994	1975	2030	11	5	FULL	0	0	3	0	3	27.872	0	0	27.872	0	27.872	34.8404	0	0	34.8404	0	34.8404	6.96837	0	0	6.96837	0	6.96837	0.633488	0	0	0.633488	0	0	27.2727	171874	0	0	171874	172697	0	0	172697
1138	Siverek	Turkey	Asia	Western Asia	37.7532	39.3182	1975	2030	11	1	FULL	0	0	4	0	4	7.98042	0	0	7.98042	0	7.98042	14.9624	0	0	14.9624	0	14.9624	6.98198	0	0	6.98198	0	6.98198	0.634726	0	0	0.634726	0	0	36.3636	68771.7	0	0	68771.7	209327	0	0	209327
1139	Sodo	Ethiopia	Africa	Eastern Africa	6.85552	37.7574	2000	2030	6	3	FULL	0	5	5	5	0	15.8907	0	15.8907	15.8907	15.8907	0	27.8085	0	27.8085	27.8085	27.8085	0	11.9178	0	11.9178	11.9178	11.9178	0	1.9863	0	1.9863	1.9863	0	83.3333	0	66997.9	0	66997.9	66997.9	163954	0	163954	163954
1140	Sohung	North Korea	Asia	Eastern Asia	38.4196	126.232	1975	2030	11	1	FULL	0	0	3	0	3	3.9964	0	0	3.9964	0	3.9964	6.99413	0	0	6.99413	0	6.99413	2.99774	0	0	2.99774	0	2.99774	0.272522	0	0	0.272522	0	0	27.2727	55212.8	0	0	55212.8	68548.6	0	0	68548.6
1142	Solok	Indonesia	Asia	South-Eastern Asia	-0.802808	100.659	1995	2030	7	3	FULL	0	1	1	1	0	20.8602	0	20.8602	20.8602	20.8602	0	22.847	0	22.847	22.847	22.847	0	1.98682	0	1.98682	1.98682	1.98682	0	0.283831	0	0.283831	0.283831	0	14.2857	0	52906.4	0	52906.4	52906.4	70989.1	0	70989.1	70989.1
1143	SololÃ¡ - Tz'olÃ¶j Ya'	Guatemala	North America	Central America	14.7897	-91.1808	2020	2030	2	10	FULL	0	2	2	2	0	15.9072	0	15.9072	15.9072	15.9072	0	26.848	0	26.848	26.848	26.848	0	10.9408	0	10.9408	10.9408	10.9408	0	5.47041	0	5.47041	5.47041	0	100	0	63557.5	0	63557.5	63557.5	99518.2	0	99518.2	99518.2
1144	Sonsonate	El Salvador	North America	Central America	13.7201	-89.7241	1975	2030	11	21	FULL	1	6	6	6	0	12.94	0	12.94	12.94	12.94	0	32.8493	1.46754	32.8493	32.8493	31.3817	0	19.9093	1.46754	19.9093	19.9093	18.4417	0	1.80993	0.133412	1.80993	1.80993	9.09091	54.5455	0	77675	0	77675	77675	185614	6191.41	185614	185614
1145	Sorsogon City	Philippines	Asia	South-Eastern Asia	12.9738	124.005	2005	2030	5	4	FULL	0	2	2	2	0	12.915	0	12.915	12.915	12.915	0	25.8307	0	25.8307	25.8307	25.8307	0	12.9158	0	12.9158	12.9158	12.9158	0	2.58315	0	2.58315	2.58315	0	40	0	52200	0	52200	52200	104566	0	104566	104566
1146	Sragen	Indonesia	Asia	South-Eastern Asia	-7.42775	111.023	1975	2030	11	4	FULL	0	3	3	3	1	23.8255	0	19.9611	23.8255	19.9611	3.86437	25.8113	0	21.9469	25.8113	21.9469	3.86437	1.98574	0	1.98574	1.98574	1.98574	0	0.180522	0	0.180522	0.180522	0	27.2727	9.09091	197624	0	182171	197624	121317	0	109911	121317
1147	Stabat	Indonesia	Asia	South-Eastern Asia	3.74851	98.4574	1975	2030	11	2	FULL	0	0	3	0	3	13.8971	0	0	13.8971	0	13.8971	16.8749	0	0	16.8749	0	16.8749	2.97787	0	0	2.97787	0	2.97787	0.270716	0	0	0.270716	0	0	27.2727	127088	0	0	127088	110608	0	0	110608
1148	Suan	North Korea	Asia	Eastern Asia	38.7767	126.364	2005	2030	5	1	FULL	0	0	0	0	0	6.99348	0	0	6.99348	0	6.99348	6.99348	0	0	6.99348	0	6.99348	0	0	0	0	0	0	0	0	0	0	0	0	0	54030.6	0	0	54030.6	57310.1	0	0	57310.1
1149	Subang	Indonesia	Asia	South-Eastern Asia	-6.56555	107.764	1975	2030	11	10	FULL	0	6	7	6	5	12.9345	0	11.0419	12.9345	11.0419	1.89257	45.7704	0	31.986	45.7704	31.986	13.7844	32.8359	0	20.9441	32.8359	20.9441	11.8918	2.98508	0	1.90401	2.98508	0	54.5455	45.4545	95348.9	0	78162.3	95348.9	227965	0	169177	227965
1150	Subic	Philippines	Asia	South-Eastern Asia	14.8727	120.244	2015	2030	3	1	FULL	0	1	1	1	0	23.8932	0	8.33685	23.8932	8.33685	15.5564	26.8801	0	11.3237	26.8801	11.3237	15.5564	2.98686	0	2.98685	2.98686	2.98685	0	0.995621	0	0.995618	0.995621	0	33.3333	0	91468	0	27668.9	91468	131591	0	44271.9	131591
1151	Sukasari	Indonesia	Asia	South-Eastern Asia	-6.38142	105.934	2020	2030	2	6	FULL	2	2	2	0	0	20.852	20.852	20.852	20.852	0	0	32.7649	32.7649	32.7649	32.7649	0	0	11.9129	11.9129	11.9129	11.9129	0	0	5.95645	5.95645	5.95645	5.95645	100	0	0	54183.2	54183.2	54183.2	54183.2	81949.9	81949.9	81949.9	81949.9
1152	Sukoharjo	Indonesia	Asia	South-Eastern Asia	-7.67836	110.842	1975	2030	11	6	FULL	0	0	3	0	3	14.8908	0	0	14.8908	0	14.8908	17.8691	0	0	17.8691	0	17.8691	2.97838	0	0	2.97838	0	2.97838	0.270762	0	0	0.270762	0	0	27.2727	73103.7	0	0	73103.7	67735.5	0	0	67735.5
1153	Sukorejo	Indonesia	Asia	South-Eastern Asia	-7.99506	112.028	1995	2030	7	8	FULL	0	1	1	1	2	21.848	0	1.16642	21.848	1.16642	20.6816	21.848	0	1.16642	21.848	1.16642	20.6816	0	0	0	0	0	0	0	0	0	0	0	14.2857	28.5714	52676.3	0	2113.34	52676.3	54274.8	0	1906.63	54274.8
1154	Sumbawa Besar	Indonesia	Asia	South-Eastern Asia	-8.49373	117.418	1975	2030	11	2	FULL	0	0	5	0	5	12.9067	0	0	12.9067	0	12.9067	24.8218	0	0	24.8218	0	24.8218	11.9151	0	0	11.9151	0	11.9151	1.08319	0	0	1.08319	0	0	45.4545	83366.2	0	0	83366.2	160505	0	0	160505
1156	Sumedang	Indonesia	Asia	South-Eastern Asia	-6.84316	107.921	1975	2030	11	9	FULL	3	5	5	4	0	19.9053	10.3103	19.9053	19.9053	9.59509	0	60.7126	46.1649	60.7126	60.7126	14.5477	0	40.8073	35.8547	40.8073	40.8073	4.95262	0	3.70975	3.25951	3.70975	3.70975	27.2727	36.3636	0	111209	54884.5	111209	111209	314831	226973	314831	314831
1157	Sungai Penuh	Indonesia	Asia	South-Eastern Asia	-2.06253	101.395	2015	2030	3	2	FULL	0	0	0	0	0	5.96564	0	0	5.96564	0	5.96564	5.96564	0	0	5.96564	0	5.96564	0	0	0	0	0	0	0	0	0	0	0	0	0	50892.4	0	0	50892.4	60109.4	0	0	60109.4
1158	Sunzha	Russia	Europe	Eastern Europe	43.3187	45.0448	1975	2030	11	1	FULL	0	0	3	0	3	10.9865	0	0	10.9865	0	10.9865	22.9716	0	0	22.9716	0	22.9716	11.9851	0	0	11.9851	0	11.9851	1.08955	0	0	1.08955	0	0	27.2727	145971	0	0	145971	94226.6	0	0	94226.6
1159	Suq Shamar	Yemen	Asia	Western Asia	15.8978	43.3779	2010	2030	4	1	FULL	0	0	1	0	1	11.9309	0	0	11.9309	0	11.9309	11.9309	0	0	11.9309	0	11.9309	0	0	0	0	0	0	0	0	0	0	0	0	25	53276.7	0	0	53276.7	90346.9	0	0	90346.9
1160	Surabaya	Indonesia	Asia	South-Eastern Asia	-7.40246	112.683	1975	2030	11	9	FULL	6	9	9	9	10	696.506	62.282	393.834	696.506	331.552	302.672	1288.64	101.219	862.086	1288.64	760.868	426.554	592.135	38.9367	468.252	592.135	429.315	123.883	53.8304	3.5397	42.5684	53.8304	54.5455	81.8182	90.9091	3.60938e+06	253090	1.4683e+06	3.60938e+06	7001535	365980	3198996	7001535
1161	Surakarta	Indonesia	Asia	South-Eastern Asia	-7.55783	110.796	1975	2030	11	7	FULL	1	5	5	5	5	298.823	0	73.5376	298.823	73.5376	225.285	371.293	0	119.204	371.293	119.204	252.089	72.47	0	45.666	72.47	45.666	26.804	6.58819	0	4.15146	6.58819	9.09091	45.4545	45.4545	1.31068e+06	0	348322	1.31068e+06	1.49333e+06	0	340276	1.49333e+06
1162	Suralaya	Indonesia	Asia	South-Eastern Asia	-5.89163	106.059	2005	2030	5	4	FULL	0	0	1	0	1	22.8383	0	0	22.8383	0	22.8383	28.7964	0	0	28.7964	0	28.7964	5.95804	0	0	5.95804	0	5.95804	1.19161	0	0	1.19161	0	0	20	54737.4	0	0	54737.4	81303.5	0	0	81303.5
1163	Surigao City	Philippines	Asia	South-Eastern Asia	9.78817	125.483	2000	2030	6	1	FULL	0	0	4	0	4	11.9366	0	0	11.9366	0	11.9366	27.8507	0	0	27.8507	0	27.8507	15.9141	0	0	15.9141	0	15.9141	2.65235	0	0	2.65235	0	0	66.6667	52241	0	0	52241	144154	0	0	144154
1164	Suwa	Japan	Asia	Eastern Asia	36.0125	138.138	1975	2030	11	13	FULL	0	3	3	3	0	31.96	0	31.96	31.96	31.96	0	30.9623	0	30.9623	30.9623	30.9623	0	-0.997715	0	-0.997715	-0.997715	-0.997715	0	-0.0907013	0	-0.0907013	-0.0907013	0	27.2727	0	82867.1	0	82867.1	82867.1	64108.3	0	64108.3	64108.3
1165	Syracuse	Italy	Europe	Southern Europe	37.0862	15.279	1975	2030	11	1	FULL	0	0	0	0	0	24.9354	0	0	24.9354	0	24.9354	24.9354	0	0	24.9354	0	24.9354	0	0	0	0	0	0	0	0	0	0	0	0	0	93575.8	0	0	93575.8	95838.2	0	0	95838.2
1168	Tabaco	Philippines	Asia	South-Eastern Asia	13.3538	123.726	1990	2030	8	4	FULL	5	5	5	5	0	17.8809	0.864378	17.8809	17.8809	17.0165	0	70.5294	24.8845	70.5294	70.5294	45.6449	0	52.6485	24.0201	52.6485	52.6485	28.6284	0	6.58106	3.00251	6.58106	6.58106	62.5	62.5	0	53175	1964.6	53175	53175	209715	57010.9	209715	209715
1169	Tabora	Tanzania	Africa	Eastern Africa	-5.01817	32.8114	1980	2030	10	1	PARTIAL	0	0	5	0	5	23.8225	0	0	18.9747	0	18.9747	45.6604	0	0	30.4499	0	30.4499	21.8379	0	0	11.4752	0	11.4752	2.18379	0	0	1.14752	0	0	50	71629.7	0	0	59514.2	245334	0	0	192647
1170	Tacloban	Philippines	Asia	South-Eastern Asia	11.2314	125.004	1975	2030	11	2	FULL	0	0	8	0	8	23.8616	0	0	23.8616	0	23.8616	61.6476	0	0	61.6476	0	61.6476	37.786	0	0	37.786	0	37.786	3.43509	0	0	3.43509	0	0	72.7273	82108.6	0	0	82108.6	284114	0	0	284114
1171	Tacna	Peru	South America	South America	-18.0034	-70.245	1980	2030	10	4	FULL	0	0	7	0	7	21.8731	0	0	21.8731	0	21.8731	47.7229	0	0	47.7229	0	47.7229	25.8498	0	0	25.8498	0	25.8498	2.58498	0	0	2.58498	0	0	70	63383	0	0	63383	360997	0	0	360997
1172	Tacoma	United States of America	North America	Northern America	47.225	-122.458	1975	2030	11	1	FULL	0	0	8	0	8	120.97	0	0	120.97	0	120.97	194.951	0	0	194.951	0	194.951	73.9806	0	0	73.9806	0	73.9806	6.72551	0	0	6.72551	0	0	72.7273	99489.6	0	0	99489.6	346653	0	0	346653
1173	Tacurong	Philippines	Asia	South-Eastern Asia	6.68856	124.685	2020	2030	2	2	FULL	0	0	2	0	2	13.9091	0	0	13.9091	0	13.9091	22.8509	0	0	22.8509	0	22.8509	8.94172	0	0	8.94172	0	8.94172	4.47086	0	0	4.47086	0	0	100	56859.3	0	0	56859.3	99797.4	0	0	99797.4
1174	Tadjoura	Djibouti	Africa	Eastern Africa	11.785	42.8809	2010	2030	4	4	FULL	0	0	0	0	0	6.96055	0	0	6.96055	0	6.96055	6.96055	0	0	6.96055	0	6.96055	0	0	0	0	0	0	0	0	0	0	0	0	0	61695.1	0	0	61695.1	65314.7	0	0	65314.7
1175	Tagbilaran	Philippines	Asia	South-Eastern Asia	9.65119	123.867	1990	2030	8	1	PARTIAL	0	0	3	0	3	31.7804	0	0	8.85665	0	8.85665	48.6615	0	0	12.9404	0	12.9404	16.8811	0	0	4.08373	0	4.08373	2.11014	0	0	0.510467	0	0	37.5	62107.4	0	0	9883.03	141803	0	0	23816.5
1176	Tagum	Philippines	Asia	South-Eastern Asia	7.45074	125.804	1990	2030	8	2	FULL	0	7	7	7	4	19.9026	0	17.4227	19.9026	17.4227	2.47993	63.685	0	52.692	63.685	52.692	10.993	43.7823	0	35.2693	43.7823	35.2693	8.51304	5.47279	0	4.40866	5.47279	0	87.5	50	55464.9	0	51125.5	55464.9	411634	0	373068	411634
1178	Taipei	Taiwan	Asia	Eastern Asia	25.0439	121.51	1975	2030	11	2	FULL	9	11	11	11	11	500.719	35.7283	426.267	500.719	390.538	74.4518	1013.45	64.9578	615.166	1013.45	550.208	398.28	512.727	29.2295	188.899	512.727	159.67	323.828	46.6116	2.65723	17.1727	46.6116	81.8182	100	100	3.72261e+06	271714	3.52588e+06	3.72261e+06	10050948	489464	7.62611e+06	10050948
1179	Tajimi	Japan	Asia	Eastern Asia	35.3401	137.122	1975	2030	11	4	FULL	0	0	4	0	4	24.9463	0	0	24.9463	0	24.9463	22.9514	0	0	22.9514	0	22.9514	-1.9949	0	0	-1.9949	0	-1.9949	-0.181354	0	0	-0.181354	0	0	36.3636	76592.7	0	0	76592.7	59970.7	0	0	59970.7
1180	Takaoka	Japan	Asia	Eastern Asia	36.7656	137.064	1975	2030	11	8	FULL	0	0	6	0	6	60.886	0	0	60.886	0	60.886	92.8211	0	0	92.8211	0	92.8211	31.935	0	0	31.935	0	31.935	2.90318	0	0	2.90318	0	0	54.5455	96153.3	0	0	96153.3	154155	0	0	154155
1181	Takasaki [Maebashi]	Japan	Asia	Eastern Asia	36.3599	139.034	1975	2030	11	13	FULL	0	7	7	7	1	132.725	0	132.725	132.725	132.725	0	220.546	0	220.546	220.546	220.546	0	87.8209	0	87.8209	87.8209	87.8209	0	7.98372	0	7.98372	7.98372	0	63.6364	9.09091	448830	0	448830	448830	445665	0	445665	445665
1183	Takengon	Indonesia	Asia	South-Eastern Asia	4.62943	96.8472	1975	2030	11	2	FULL	0	0	0	0	0	11.9278	0	11.9278	11.9278	11.9278	0	11.9278	0	11.9278	11.9278	11.9278	0	0	0	0	0	0	0	0	0	0	0	0	0	0	82785.2	0	82785.2	82785.2	71810.6	0	71810.6	71810.6
1184	Talagante	Chile	South America	South America	-33.6661	-70.93	2020	2030	2	1	FULL	0	0	0	0	0	10.9712	0	0	10.9712	0	10.9712	10.9712	0	0	10.9712	0	10.9712	0	0	0	0	0	0	0	0	0	0	0	0	0	53501.6	0	0	53501.6	59737.8	0	0	59737.8
1185	Talavera	Philippines	Asia	South-Eastern Asia	15.6021	120.921	2020	2030	2	1	FULL	0	0	1	0	1	16.9078	0	0	16.9078	0	16.9078	23.8728	0	0	23.8728	0	23.8728	6.96497	0	0	6.96497	0	6.96497	3.48249	0	0	3.48249	0	0	50	63151.2	0	0	63151.2	84582.1	0	0	84582.1
1186	Talca	Chile	South America	South America	-35.4303	-71.6523	1975	2030	11	5	FULL	0	0	7	0	7	26.9584	0	0	26.9584	0	26.9584	43.9307	0	0	43.9307	0	43.9307	16.9723	0	0	16.9723	0	16.9723	1.54294	0	0	1.54294	0	0	63.6364	116338	0	0	116338	274618	0	0	274618
1187	Tam Ky	Vietnam	Asia	South-Eastern Asia	15.5618	108.485	1995	2030	7	1	FULL	0	0	2	0	2	19.905	0	0	19.905	0	19.905	19.9043	0	0	19.9043	0	19.9043	0	0	0	0	0	0	0	0	0	0	0	0	28.5714	67692.9	0	0	67692.9	84316.9	0	0	84316.9
1188	Tamanrasset	Algeria	Africa	Northern Africa	22.7902	5.5278	1995	2030	7	2	FULL	0	0	6	0	6	13.9463	0	0	13.9463	0	13.9463	22.9116	0	0	22.9116	0	22.9116	8.96537	0	0	8.96537	0	8.96537	1.28077	0	0	1.28077	0	0	85.7143	52846.9	0	0	52846.9	138511	0	0	138511
1190	Tanay	Philippines	Asia	South-Eastern Asia	14.4978	121.296	2005	2030	5	3	FULL	0	0	3	0	3	18.8889	0	0	18.8889	0	18.8889	50.7028	0	0	50.7028	0	50.7028	31.8139	0	0	31.8139	0	31.8139	6.36278	0	0	6.36278	0	0	60	52725.8	0	0	52725.8	154962	0	0	154962
1191	Tapachula	Mexico	North America	Central America	14.9036	-92.2602	1975	2030	11	4	FULL	0	4	6	4	6	24.8382	0	11.733	24.8382	11.733	13.1052	53.6442	0	17.1242	53.6442	17.1242	36.5199	28.806	0	5.39122	28.806	5.39122	23.4148	2.61873	0	0.490111	2.61873	0	36.3636	54.5455	83651.7	0	34809.5	83651.7	323011	0	107105	323011
1192	Tarlac City	Philippines	Asia	South-Eastern Asia	15.4758	120.593	1975	2030	11	1	FULL	0	0	7	0	7	28.8577	0	0	28.8577	0	28.8577	52.7395	0	0	52.7395	0	52.7395	23.8818	0	0	23.8818	0	23.8818	2.17107	0	0	2.17107	0	0	63.6364	93615	0	0	93615	206982	0	0	206982
1193	Tarogong	Indonesia	Asia	South-Eastern Asia	-7.19394	107.924	1975	2030	11	10	FULL	11	11	11	11	0	81.6132	36.5091	81.6132	81.6132	45.1041	0	314.499	138.628	314.499	314.499	175.871	0	232.886	102.119	232.886	232.886	130.767	0	21.1714	9.28354	21.1714	21.1714	100	100	0	554524	240935	554524	554524	1.49286e+06	650955	1.49286e+06	1.49286e+06
1194	Tarutung	Indonesia	Asia	South-Eastern Asia	2.02006	98.9688	1975	2030	11	1	FULL	0	0	1	0	1	7.93961	0	0	7.93961	0	7.93961	8.93219	0	0	8.93219	0	8.93219	0.992577	0	0	0.992577	0	0.992577	0.0902343	0	0	0.0902343	0	0	9.09091	69646.6	0	0	69646.6	52059.1	0	0	52059.1
1195	Tasikmalaya	Indonesia	Asia	South-Eastern Asia	-7.29334	108.202	1975	2030	11	10	FULL	8	11	11	11	9	199.012	12.0916	180.174	199.012	168.083	18.8377	547.294	71.5745	495.657	547.294	424.083	51.6367	348.282	59.483	315.483	348.282	256	32.7989	31.662	5.40754	28.6803	31.662	72.7273	100	81.8182	1.08332e+06	51996	841235	1.08332e+06	3081331	170705	2777681	3081331
1197	Tatvan	Turkey	Asia	Western Asia	38.5023	42.2866	1995	2030	7	1	FULL	0	2	2	2	0	10.9893	0	10.9893	10.9893	10.9893	0	12.9878	0	12.9878	12.9878	12.9878	0	1.99847	0	1.99847	1.99847	1.99847	0	0.285496	0	0.285496	0.285496	0	28.5714	0	54341.6	0	54341.6	54341.6	53383.8	0	53383.8	53383.8
1198	Tauranga	New Zealand	Oceania	Australia and New Zealand	-37.6896	176.178	2015	2030	3	3	FULL	0	0	1	0	1	86.7909	0	0	86.7909	0	86.7909	104.749	0	0	104.749	0	104.749	17.958	0	0	17.958	0	17.958	5.98601	0	0	5.98601	0	0	33.3333	99418.2	0	0	99418.2	124619	0	0	124619
1199	Taxco	Mexico	North America	Central America	18.5544	-99.6102	2015	2030	3	2	FULL	0	0	1	0	1	7.95147	0	0	7.95147	0	7.95147	8.94564	0	0	8.94564	0	8.94564	0.994165	0	0	0.994165	0	0.994165	0.331388	0	0	0.331388	0	0	33.3333	50716.3	0	0	50716.3	62999.8	0	0	62999.8
1200	Tayabas City	Philippines	Asia	South-Eastern Asia	14.0303	121.593	2025	2030	1	3	FULL	0	0	0	0	0	7.95098	0	7.95098	7.95098	7.95098	0	7.95098	0	7.95098	7.95098	7.95098	0	0	0	0	0	0	0	0	0	0	0	0	0	0	50589.8	0	50589.8	50589.8	54037.2	0	54037.2	54037.2
1201	Tbilisi	Georgia	Asia	Western Asia	41.7164	44.8252	1975	2030	11	1	PARTIAL	0	0	7	0	7	129.793	0	0	108.039	0	108.039	151.759	0	0	128.875	0	128.875	21.9659	0	0	20.8361	0	20.8361	1.9969	0	0	1.89419	0	0	63.6364	884067	0	0	792498	1002770	0	0	890145
1202	Tebela	Ethiopia	Africa	Eastern Africa	6.70246	37.7707	1990	2030	8	3	FULL	0	5	5	5	0	3.97258	0	3.97258	3.97258	3.97258	0	9.93131	0	9.93131	9.93131	9.93131	0	5.95873	0	5.95873	5.95873	5.95873	0	0.744841	0	0.744841	0.744841	0	62.5	0	57142	0	57142	57142	69000	0	69000	69000
1203	Tebing Tinggi	Indonesia	Asia	South-Eastern Asia	3.33876	99.1628	1975	2030	11	3	FULL	0	0	7	0	7	25.8064	0	0	25.8064	0	25.8064	40.695	0	0	40.695	0	40.695	14.8886	0	0	14.8886	0	14.8886	1.35351	0	0	1.35351	0	0	63.6364	130827	0	0	130827	272362	0	0	272362
1204	Tecoman	Mexico	North America	Central America	18.9128	-103.88	1995	2030	7	1	FULL	0	0	2	0	2	16.9028	0	0	16.9028	0	16.9028	18.8918	0	0	18.8918	0	18.8918	1.98897	0	0	1.98897	0	1.98897	0.284138	0	0	0.284138	0	0	28.5714	56301.1	0	0	56301.1	131654	0	0	131654
1205	Tegal	Indonesia	Asia	South-Eastern Asia	-6.92526	109.119	1975	2030	11	4	FULL	0	2	4	2	5	264.35	0	39.7465	264.35	39.7465	224.604	362.728	0	55.8473	362.728	55.8473	306.881	98.3776	0	16.1007	98.3776	16.1007	82.2768	8.94341	0	1.4637	8.94341	0	18.1818	45.4545	1.15806e+06	0	149103	1.15806e+06	1.45005e+06	0	187402	1.45005e+06
1206	Tegalglagah	Indonesia	Asia	South-Eastern Asia	-6.90655	108.99	1975	2030	11	2	FULL	0	0	3	0	3	20.8732	0	0	20.8732	0	20.8732	18.8856	0	0	18.8856	0	18.8856	-1.98757	0	0	-1.98757	0	-1.98757	-0.180688	0	0	-0.180688	0	0	27.2727	82047.9	0	0	82047.9	75606.5	0	0	75606.5
1207	Tegucigalpa	Honduras	North America	Central America	14.0821	-87.197	1975	2030	11	2	PARTIAL	0	0	11	0	11	84.4326	0	0	82.3609	0	82.3609	164.891	0	0	152.843	0	152.843	80.458	0	0	70.4816	0	70.4816	7.31436	0	0	6.40742	0	0	100	422220	0	0	415394	1.76024e+06	0	0	1.7076e+06
1208	Tehran	Iran	Asia	Southern Asia	35.6723	51.3328	1975	2030	11	1	PARTIAL	0	0	11	0	11	671.027	0	0	604.133	0	604.133	825.58	0	0	809.877	0	809.877	154.553	0	0	205.744	0	205.744	14.0503	0	0	18.704	0	0	100	4.15157e+06	0	0	3551037	9802554	0	0	9751881
1209	TehuacÃ¡n	Mexico	North America	Central America	18.4579	-97.3945	1980	2030	10	4	FULL	0	0	5	0	5	28.8411	0	0	28.8411	0	28.8411	52.7107	0	0	52.7107	0	52.7107	23.8696	0	0	23.8696	0	23.8696	2.38696	0	0	2.38696	0	0	50	73672.7	0	0	73672.7	215314	0	0	215314
1210	Telde	Spain	Europe	Southern Europe	27.9929	-15.3924	2005	2030	5	1	FULL	0	2	2	2	0	27.8735	0	27.8735	27.8735	27.8735	0	30.8601	0	30.8601	30.8601	30.8601	0	2.98664	0	2.98664	2.98664	2.98664	0	0.597328	0	0.597328	0.597328	0	40	0	57452.9	0	57452.9	57452.9	69144.7	0	69144.7	69144.7
1211	Temanggung	Indonesia	Asia	South-Eastern Asia	-7.31788	110.18	1975	2030	11	5	FULL	0	7	7	7	0	15.887	0	15.887	15.887	15.887	0	31.7737	0	31.7737	31.7737	31.7737	0	15.8867	0	15.8867	15.8867	15.8867	0	1.44424	0	1.44424	1.44424	0	63.6364	0	136698	0	136698	136698	128953	0	128953	128953
1213	Tempeh	Indonesia	Asia	South-Eastern Asia	-8.16416	113.177	1985	2030	9	9	FULL	0	1	1	1	1	16.9012	0	16.9012	16.9012	16.9012	0	20.8781	0	18.909	20.8781	18.909	1.96907	3.97687	0	2.0078	3.97687	2.0078	1.96907	0.441874	0	0.223089	0.441874	0	11.1111	11.1111	59999.6	0	59999.6	59999.6	56796	0	52493.6	56796
1214	Temuco	Chile	South America	South America	-38.7382	-72.6025	1975	2030	11	6	FULL	0	0	10	0	10	23.972	0	0	23.972	0	23.972	63.9227	0	0	63.9227	0	63.9227	39.9508	0	0	39.9508	0	39.9508	3.63189	0	0	3.63189	0	0	90.9091	86579.4	0	0	86579.4	363011	0	0	363011
1215	Tena	Ecuador	South America	South America	-0.993456	-77.8156	2025	2030	1	6	FULL	0	0	1	0	1	8.95411	0	0	8.95411	0	8.95411	10.9434	0	0	10.9434	0	10.9434	1.98933	0	0	1.98933	0	1.98933	1.98933	0	0	1.98933	0	0	100	54647.6	0	0	54647.6	67035.9	0	0	67035.9
1217	Tengaran	Indonesia	Asia	South-Eastern Asia	-7.44892	110.545	1995	2030	7	6	FULL	0	1	1	1	0	18.862	1.53704	18.862	18.862	17.325	0	18.8631	1.53704	18.8631	18.8631	17.3261	0	0	0	0	0	0	0	0	0	0	0	0	14.2857	0	56899.6	5003.26	56899.6	56899.6	55447.9	5202.64	55447.9	55447.9
1218	Tengchong	China	Asia	Eastern Asia	25.0261	98.4969	1975	2030	11	1	FULL	0	2	2	2	0	14.9274	0	14.9274	14.9274	14.9274	0	18.9055	0	18.9055	18.9055	18.9055	0	3.97806	0	3.97806	3.97806	3.97806	0	0.361642	0	0.361642	0.361642	0	18.1818	0	82534.9	0	82534.9	82534.9	88078.5	0	88078.5	88078.5
1219	Tepeji de Ocampo	Mexico	North America	Central America	19.9071	-99.3444	2020	2030	2	3	FULL	0	0	0	0	0	14.9113	0	0	14.9113	0	14.9113	14.9113	0	0	14.9113	0	14.9113	0	0	0	0	0	0	0	0	0	0	0	0	0	53140.3	0	0	53140.3	60938.3	0	0	60938.3
1220	Tepic	Mexico	North America	Central America	21.5006	-104.886	1975	2030	11	3	FULL	2	9	9	9	0	31.8202	0	31.8202	31.8202	31.8202	0	66.6198	1.08773	66.6198	66.6198	65.5321	0	34.7997	1.08773	34.7997	34.7997	33.7119	0	3.16361	0.0988849	3.16361	3.16361	18.1818	81.8182	0	69215.8	0	69215.8	69215.8	446570	1374.07	446570	446570
1221	Ternate	Indonesia	Asia	South-Eastern Asia	0.79382	127.382	1980	2030	10	12	FULL	3	3	3	0	0	19.8726	19.8726	19.8726	19.8726	0	0	33.7807	33.7807	33.7807	33.7807	0	0	13.9081	13.9081	13.9081	13.9081	0	0	1.39081	1.39081	1.39081	1.39081	30	0	0	61344.4	61344.4	61344.4	61344.4	304015	304015	304015	304015
1222	Terni	Italy	Europe	Southern Europe	42.5663	12.637	1975	2030	11	1	FULL	0	0	1	0	1	30.9857	0	0	30.9857	0	30.9857	31.9854	0	0	31.9854	0	31.9854	0.999744	0	0	0.999744	0	0.999744	0.0908858	0	0	0.0908858	0	0	9.09091	87731.9	0	0	87731.9	92775.8	0	0	92775.8
1223	Terrassa	Spain	Europe	Southern Europe	41.5599	2.02239	1975	2030	11	1	FULL	0	0	4	0	4	19.971	0	0	19.971	0	19.971	34.9488	0	0	34.9488	0	34.9488	14.9778	0	0	14.9778	0	14.9778	1.36162	0	0	1.36162	0	0	36.3636	149877	0	0	149877	263334	0	0	263334
1224	Texcoco de Mora	Mexico	North America	Central America	19.5312	-98.895	1980	2030	10	6	FULL	0	0	8	0	8	26.8408	0	0	26.8408	0	26.8408	69.5807	0	0	69.5807	0	69.5807	42.7399	0	0	42.7399	0	42.7399	4.27399	0	0	4.27399	0	0	80	58770.4	0	0	58770.4	238614	0	0	238614
1225	Texmelucan	Mexico	North America	Central America	19.2904	-98.4494	1980	2030	10	5	FULL	0	5	5	5	0	17.8931	0	17.8931	17.8931	17.8931	0	55.6669	0	55.2528	55.6669	55.2528	0	37.7737	0	37.3597	37.7737	37.3597	0	3.77737	0	3.73597	3.77737	0	50	0	67035.5	0	67035.5	67035.5	191650	0	190758	191650
1226	TeziutlÃ¡n	Mexico	North America	Central America	19.8155	-97.3695	1975	2030	11	9	FULL	0	4	4	4	0	19.8939	0	19.8939	19.8939	19.8939	0	26.8583	0	26.8583	26.8583	26.8583	0	6.96447	0	6.96447	6.96447	6.96447	0	0.633134	0	0.633134	0.633134	0	36.3636	0	58519.8	0	58519.8	58519.8	108587	0	108587	108587
1227	Thika	Kenya	Africa	Eastern Africa	-1.04969	37.0905	1985	2030	9	4	FULL	0	0	6	0	6	13.9108	0	0	13.9108	0	13.9108	33.7832	0	0	33.7832	0	33.7832	19.8724	0	0	19.8724	0	19.8724	2.20805	0	0	2.20805	0	0	66.6667	53001	0	0	53001	122239	0	0	122239
1229	Tiko	Cameroon	Africa	Middle Africa	4.08156	9.34473	2020	2030	2	3	FULL	0	1	1	1	0	16.8745	0	16.8745	16.8745	16.8745	0	17.867	0	17.867	17.867	17.867	0	0.992547	0	0.992547	0.992547	0.992547	0	0.496273	0	0.496273	0.496273	0	50	0	82931.5	0	82931.5	82931.5	98342.1	0	98342.1	98342.1
1230	Tipitapa	Nicaragua	North America	Central America	12.1895	-86.0993	2000	2030	6	11	FULL	0	2	2	2	0	12.9135	0	12.9135	12.9135	12.9135	0	20.8605	0	20.8605	20.8605	20.8605	0	7.94701	0	7.94701	7.94701	7.94701	0	1.3245	0	1.3245	1.3245	0	33.3333	0	53843.5	0	53843.5	53843.5	92339.6	0	92339.6	92339.6
1231	Tire	Turkey	Asia	Western Asia	38.0936	27.7326	2015	2030	3	1	FULL	0	0	0	0	0	6.9836	0	0	6.9836	0	6.9836	6.9836	0	0	6.9836	0	6.9836	0	0	0	0	0	0	0	0	0	0	0	0	0	54255.1	0	0	54255.1	52145.4	0	0	52145.4
1232	Tivoli	Italy	Europe	Southern Europe	41.9603	12.7806	2010	2030	4	1	FULL	0	0	0	0	0	10.9921	0	10.9921	10.9921	10.9921	0	10.9921	0	10.9921	10.9921	10.9921	0	0	0	0	0	0	0	0	0	0	0	0	0	0	50267.6	0	50267.6	50267.6	55005.9	0	55005.9	55005.9
1233	Tizayuca	Mexico	North America	Central America	19.836	-98.9681	2015	2030	3	4	FULL	0	0	2	0	2	24.8511	0	0	24.8511	0	24.8511	29.8212	0	0	29.8212	0	29.8212	4.97007	0	0	4.97007	0	4.97007	1.65669	0	0	1.65669	0	0	66.6667	72801.2	0	0	72801.2	108885	0	0	108885
1234	Tlaxcala	Mexico	North America	Central America	19.3189	-98.2127	1985	2030	9	9	FULL	0	6	6	6	0	32.8095	0	32.8095	32.8095	32.8095	0	61.6366	0	61.6366	61.6366	61.6366	0	28.8271	0	28.8271	28.8271	28.8271	0	3.20301	0	3.20301	3.20301	0	66.6667	0	79275.3	0	79275.3	79275.3	211910	0	211910	211910
1235	Tobelo	Indonesia	Asia	South-Eastern Asia	1.72367	128.01	2010	2030	4	7	FULL	0	2	2	2	0	17.8697	0	17.8697	17.8697	17.8697	0	22.8331	0	22.8331	22.8331	22.8331	0	4.96332	0	4.96332	4.96332	4.96332	0	1.24083	0	1.24083	1.24083	0	50	0	56817.6	0	56817.6	56817.6	121511	0	121511	121511
1237	Tokyo	Japan	Asia	Eastern Asia	35.6658	139.647	1975	2030	11	16	PARTIAL	0	7	9	7	9	4545.28	0	135.692	3894.11	135.692	3758.41	5088.86	0	168.863	4313.29	168.863	4144.43	543.579	0	33.1716	419.188	33.1716	386.016	49.4163	0	3.0156	38.108	0	63.6364	81.8182	24049534	0	385134	21398322	32678382	0	529220	29242652
1238	Toledo	Philippines	Asia	South-Eastern Asia	10.4177	123.662	2005	2030	5	1	FULL	0	0	4	0	4	30.7835	0	0	30.7835	0	30.7835	50.6457	0	0	50.6457	0	50.6457	19.8621	0	0	19.8621	0	19.8621	3.97243	0	0	3.97243	0	0	80	61596.4	0	0	61596.4	147045	0	0	147045
1239	Toluca	Mexico	North America	Central America	19.2821	-99.6392	1975	2030	11	6	FULL	0	10	11	10	10	62.6266	0	62.6266	62.6266	62.6266	0	393.65	0	278.019	393.65	278.019	115.631	331.023	0	215.392	331.023	215.392	115.631	30.093	0	19.5811	30.093	0	90.9091	90.9091	83390.4	0	83390.4	83390.4	1.67815e+06	0	1.35419e+06	1.67815e+06
1240	Tomakomai	Japan	Asia	Eastern Asia	42.6393	141.604	1975	2030	11	7	FULL	0	5	5	5	0	48.9349	0	48.9349	48.9349	48.9349	0	64.9142	0	64.9142	64.9142	64.9142	0	15.9793	0	15.9793	15.9793	15.9793	0	1.45266	0	1.45266	1.45266	0	45.4545	0	102409	0	102409	102409	133489	0	133489	133489
1241	Tomohon	Indonesia	Asia	South-Eastern Asia	1.32931	124.836	2005	2030	5	6	FULL	1	1	1	0	0	13.9087	13.9087	13.9087	13.9087	0	0	17.8842	17.8842	17.8842	17.8842	0	0	3.97547	3.97547	3.97547	3.97547	0	0	0.795094	0.795094	0.795094	0.795094	20	0	0	54723.5	54723.5	54723.5	54723.5	86516.3	86516.3	86516.3	86516.3
1242	Tondano	Indonesia	Asia	South-Eastern Asia	1.30924	124.913	2010	2030	4	6	FULL	3	3	3	0	0	7.94839	7.94839	7.94839	7.94839	0	0	17.8844	17.8162	17.8844	17.8844	0	0	9.93604	9.86777	9.93604	9.93604	0	0	2.48401	2.46694	2.48401	2.48401	75	0	0	50802.8	50802.8	50802.8	50802.8	83833.8	83737.3	83833.8	83833.8
1243	Tonghua	China	Asia	Eastern Asia	41.6773	125.747	1975	2030	11	1	FULL	0	0	3	0	3	5.99819	0	0	5.99819	0	5.99819	6.9976	0	0	6.9976	0	6.9976	0.999415	0	0	0.999415	0	0.999415	0.0908559	0	0	0.0908559	0	0	27.2727	62176.4	0	0	62176.4	54020.2	0	0	54020.2
1244	Tonghua	China	Asia	Eastern Asia	41.7303	125.939	1975	2030	11	1	FULL	0	0	4	0	4	31.9966	0	0	31.9966	0	31.9966	35.9952	0	0	35.9952	0	35.9952	3.99857	0	0	3.99857	0	3.99857	0.363507	0	0	0.363507	0	0	36.3636	297851	0	0	297851	293669	0	0	293669
1245	Tosu	Japan	Asia	Eastern Asia	33.3835	130.526	1975	2030	11	4	FULL	0	0	5	0	5	23.929	0	0	23.929	0	23.929	35.8912	0	0	35.8912	0	35.8912	11.9622	0	0	11.9622	0	11.9622	1.08747	0	0	1.08747	0	0	45.4545	73337.8	0	0	73337.8	82194.4	0	0	82194.4
1246	TotonicapÃ¡n	Guatemala	North America	Central America	14.9057	-91.363	2010	2030	4	10	FULL	0	4	4	4	0	14.9124	0	14.9124	14.9124	14.9124	0	39.766	0	39.766	39.766	39.766	0	24.8536	0	24.8536	24.8536	24.8536	0	6.21339	0	6.21339	6.21339	0	100	0	56164.9	0	56164.9	56164.9	128456	0	128456	128456
1247	Toufen	Taiwan	Asia	Eastern Asia	24.682	120.886	1975	2030	11	1	FULL	0	0	6	0	6	28.8828	0	0	28.8828	0	28.8828	36.8501	0	0	36.8501	0	36.8501	7.96735	0	0	7.96735	0	7.96735	0.724305	0	0	0.724305	0	0	54.5455	134212	0	0	134212	157521	0	0	157521
1249	Toyama	Japan	Asia	Eastern Asia	36.7055	137.232	1975	2030	11	8	FULL	0	0	7	0	7	47.9166	0	0	47.9166	0	47.9166	92.84	0	0	92.84	0	92.84	44.9233	0	0	44.9233	0	44.9233	4.08394	0	0	4.08394	0	0	63.6364	89102.9	0	0	89102.9	223718	0	0	223718
1250	Trenggalek	Indonesia	Asia	South-Eastern Asia	-8.06191	111.703	1975	2030	11	5	FULL	0	5	5	5	4	18.866	0	13.7845	18.866	13.7845	5.08149	40.7093	0	27.9198	40.7093	27.9198	12.7895	21.8433	0	14.1353	21.8433	14.1353	7.70804	1.98576	0	1.28503	1.98576	0	45.4545	36.3636	103445	0	82207	103445	132293	0	95011.4	132293
1251	Trier	Germany	Europe	Western Europe	49.7487	6.64201	1975	2030	11	1	FULL	0	0	5	0	5	16.0163	0	0	16.0163	0	16.0163	26.0263	0	0	26.0263	0	26.0263	10.01	0	0	10.01	0	10.01	0.910002	0	0	0.910002	0	0	45.4545	66080.8	0	0	66080.8	89513	0	0	89513
1252	Tsuchiura	Japan	Asia	Eastern Asia	36.0577	140.196	1975	2030	11	3	PARTIAL	0	0	4	0	4	41.8844	0	0	17.1732	0	17.1732	66.8158	0	0	36.2969	0	36.2969	24.9314	0	0	19.1236	0	19.1236	2.26649	0	0	1.73851	0	0	36.3636	107628	0	0	54716.2	127695	0	0	74814.7
1253	Tsukuba	Japan	Asia	Eastern Asia	36.0754	140.116	1980	2030	10	5	FULL	0	0	5	0	5	24.9322	0	0	24.9322	0	24.9322	25.9295	0	0	25.9295	0	25.9295	0.997281	0	0	0.997281	0	0.997281	0.0997281	0	0	0.0997281	0	0	50	61564.1	0	0	61564.1	57192.2	0	0	57192.2
1255	Tsuruoka	Japan	Asia	Eastern Asia	38.7302	139.831	1975	2030	11	5	FULL	0	0	0	0	0	20.9575	0	0.559512	20.9575	0.559512	20.398	17.9637	0	0.523793	17.9637	0.523793	17.4399	-2.99385	0	0	-2.99385	0	-2.95814	-0.272169	0	0	-0.272169	0	0	0	110818	0	348.553	110818	56218.6	0	307.844	56218.6
1256	Tuban	Indonesia	Asia	South-Eastern Asia	-6.89931	112.051	1975	2030	11	1	PARTIAL	0	0	4	0	4	30.7838	0	0	11.0001	0	11.0001	44.6863	0	0	18.9446	0	18.9446	13.9025	0	0	7.94456	0	7.94456	1.26386	0	0	0.722232	0	0	36.3636	160648	0	0	42544.8	188175	0	0	65209.5
1257	Tubod	Philippines	Asia	South-Eastern Asia	8.06351	123.776	2025	2030	1	2	FULL	0	0	0	0	0	35.7469	0	0	35.7469	0	35.7469	35.7469	0	0	35.7469	0	35.7469	0	0	0	0	0	0	0	0	0	0	0	0	0	72025.4	0	0	72025.4	80631.4	0	0	80631.4
1258	Tuguegarao	Philippines	Asia	South-Eastern Asia	17.6235	121.72	1990	2030	8	1	FULL	0	0	4	0	4	19.8834	0	0	19.8834	0	19.8834	28.8294	0	0	28.8294	0	28.8294	8.94601	0	0	8.94601	0	8.94601	1.11825	0	0	1.11825	0	0	50	54605	0	0	54605	154311	0	0	154311
1259	Tula	Mexico	North America	Central America	20.0486	-99.338	2015	2030	3	2	FULL	0	0	1	0	1	20.8764	0	0	20.8764	0	20.8764	21.8705	0	0	21.8705	0	21.8705	0.994109	0	0	0.994109	0	0.994109	0.33137	0	0	0.33137	0	0	33.3333	54159.5	0	0	54159.5	74912.9	0	0	74912.9
1260	Tulancingo	Mexico	North America	Central America	20.0784	-98.3583	1995	2030	7	2	PARTIAL	0	0	3	0	3	19.8847	0	0	10.0748	0	10.0748	30.8189	0	0	15.3056	0	15.3056	10.9343	0	0	5.23078	0	5.23078	1.56204	0	0	0.747255	0	0	42.8571	62740.6	0	0	19845.9	138732	0	0	45209.8
1261	TulcÃ¡n	Ecuador	South America	South America	0.812087	-77.7212	2000	2030	6	11	FULL	0	0	0	0	0	10.9425	0	10.9425	10.9425	10.9425	0	10.9425	0	10.9425	10.9425	10.9425	0	0	0	0	0	0	0	0	0	0	0	0	0	0	50335.9	0	50335.9	50335.9	53819.3	0	53819.3	53819.3
1262	Tulu Bolo	Ethiopia	Africa	Eastern Africa	8.66243	38.2151	2000	2030	6	2	FULL	0	0	1	0	1	5.95798	0	0	5.95798	0	5.95798	6.951	0	0	6.951	0	6.951	0.993026	0	0	0.993026	0	0.993026	0.165504	0	0	0.165504	0	0	16.6667	54120	0	0	54120	74123.8	0	0	74123.8
1263	TuluÃ¡	Colombia	South America	South America	4.08841	-76.1998	1975	2030	11	1	PARTIAL	0	0	5	0	5	12.9092	0	0	5.44605	0	5.44605	20.8534	0	0	10.8649	0	10.8649	7.9442	0	0	5.41887	0	5.41887	0.7222	0	0	0.492624	0	0	45.4545	103084	0	0	39183.4	252044	0	0	115744
1264	Tulungagung	Indonesia	Asia	South-Eastern Asia	-8.06731	111.919	1975	2030	11	8	FULL	0	4	9	4	8	77.4561	0	13.8122	77.4561	13.8122	63.6439	242.304	0	16.7859	242.304	16.7859	225.518	164.848	0	2.97369	164.848	2.97369	161.874	14.9862	0	0.270336	14.9862	0	36.3636	72.7273	370900	0	47433.5	370900	670068	0	45698.6	670068
1265	Tunchang County	China	Asia	Eastern Asia	19.3691	110.095	1975	2030	11	1	FULL	0	0	4	0	4	6.95905	0	0	6.95905	0	6.95905	11.9303	0	0	11.9303	0	11.9303	4.97128	0	0	4.97128	0	4.97128	0.451935	0	0	0.451935	0	0	36.3636	51465	0	0	51465	70011.7	0	0	70011.7
1266	Tunduma	Tanzania	Africa	Eastern Africa	-9.29693	32.7714	2000	2030	6	2	FULL	0	0	5	0	5	11.9144	0	0	11.9144	0	11.9144	25.8146	0	0	25.8146	0	25.8146	13.9002	0	0	13.9002	0	13.9002	2.3167	0	0	2.3167	0	0	83.3333	53099.2	0	0	53099.2	194178	0	0	194178
1267	Turgutlu	Turkey	Asia	Western Asia	38.4995	27.7036	1985	2030	9	1	FULL	0	0	5	0	5	7.98219	0	0	7.98219	0	7.98219	21.9508	0	0	21.9508	0	21.9508	13.9686	0	0	13.9686	0	13.9686	1.55206	0	0	1.55206	0	0	55.5556	54230.4	0	0	54230.4	164875	0	0	164875
1268	Tuxtla GutiÃ©rrez	Mexico	North America	Central America	16.7597	-93.1174	1975	2030	11	1	FULL	0	0	8	0	8	46.7015	0	0	46.7015	0	46.7015	96.3804	0	0	96.3804	0	96.3804	49.6789	0	0	49.6789	0	49.6789	4.51626	0	0	4.51626	0	0	72.7273	68950.8	0	0	68950.8	575406	0	0	575406
1269	Ube	Japan	Asia	Eastern Asia	33.9477	131.245	1985	2030	9	3	FULL	0	0	4	0	4	32.925	0	0	32.925	0	32.925	70.8371	0	0	70.8371	0	70.8371	37.9121	0	0	37.9121	0	37.9121	4.21245	0	0	4.21245	0	0	44.4444	53351.7	0	0	53351.7	128395	0	0	128395
1270	Ubud	Indonesia	Asia	South-Eastern Asia	-8.51892	115.266	2010	2030	4	3	FULL	0	0	2	0	2	14.906	0	8.82349	14.906	8.82349	6.08248	18.8804	0	9.30929	18.8804	9.30929	9.5711	3.97442	0	0	3.97442	0	3.48862	0.993606	0	0	0.993606	0	0	50	52114.5	0	30804.1	52114.5	69189.4	0	37171.6	69189.4
1271	Ueda	Japan	Asia	Eastern Asia	36.3985	138.247	1975	2030	11	13	FULL	0	5	5	5	0	23.969	0	23.969	23.969	23.969	0	26.965	0	26.965	26.965	26.965	0	2.99609	0	2.99609	2.99609	2.99609	0	0.272372	0	0.272372	0.272372	0	45.4545	0	92039.8	0	92039.8	92039.8	70565.1	0	70565.1	70565.1
1272	Ujung Batu	Indonesia	Asia	South-Eastern Asia	0.707679	100.531	2010	2030	4	2	FULL	0	0	1	0	1	9.93227	0	0	9.93227	0	9.93227	18.8714	0	0	18.8714	0	18.8714	8.93914	0	0	8.93914	0	8.93914	2.23478	0	0	2.23478	0	0	25	53854.8	0	0	53854.8	95159.2	0	0	95159.2
1277	Ulanqab	China	Asia	Eastern Asia	41.0295	113.108	1975	2030	11	1	FULL	0	0	6	0	6	30.9691	0	0	30.9691	0	30.9691	47.9538	0	0	47.9538	0	47.9538	16.9847	0	0	16.9847	0	16.9847	1.54406	0	0	1.54406	0	0	54.5455	324108	0	0	324108	267058	0	0	267058
1278	Umbulrejo	Indonesia	Asia	South-Eastern Asia	-8.22608	113.442	1990	2030	8	6	FULL	0	1	4	1	4	10.9386	0	7.78031	10.9386	7.78031	3.15827	21.8804	0	8.01804	21.8804	8.01804	13.8624	10.9419	0	0	10.9419	0	10.7041	1.36773	0	0	1.36773	0	12.5	50	51880.9	0	45758.3	51880.9	66006.3	0	42339.5	66006.3
1279	Urambo	Tanzania	Africa	Eastern Africa	-5.08162	32.0716	2025	2030	1	1	FULL	0	0	0	0	0	11.9145	0	11.9145	11.9145	11.9145	0	11.9145	0	11.9145	11.9145	11.9145	0	0	0	0	0	0	0	0	0	0	0	0	0	0	51251.5	0	51251.5	51251.5	62391.8	0	62391.8	62391.8
1280	Urdaneta	Philippines	Asia	South-Eastern Asia	15.973	120.564	2005	2030	5	1	PARTIAL	0	0	4	0	4	19.9052	0	0	19.9052	0	19.9052	46.7732	0	0	45.5758	0	45.5758	26.868	0	0	25.6706	0	25.6706	5.37359	0	0	5.13411	0	0	80	58043	0	0	58043	125957	0	0	124250
1281	Uriangato	Mexico	North America	Central America	20.1313	-101.187	1980	2030	10	1	FULL	0	0	5	0	5	14.9297	0	0	14.9297	0	14.9297	23.8881	0	0	23.8881	0	23.8881	8.95844	0	0	8.95844	0	8.95844	0.895844	0	0	0.895844	0	0	50	52383.2	0	0	52383.2	129993	0	0	129993
1282	Uruapan	Mexico	North America	Central America	19.4122	-102.044	1975	2030	11	1	FULL	0	0	7	0	7	31.885	0	0	31.885	0	31.885	54.8029	0	0	54.8029	0	54.8029	22.9179	0	0	22.9179	0	22.9179	2.08345	0	0	2.08345	0	0	63.6364	84135.8	0	0	84135.8	353912	0	0	353912
1283	Usak	Turkey	Asia	Western Asia	38.6735	29.4053	1975	2030	11	1	FULL	0	0	5	0	5	10.9872	0	0	10.9872	0	10.9872	25.9691	0	0	25.9691	0	25.9691	14.9819	0	0	14.9819	0	14.9819	1.36199	0	0	1.36199	0	0	45.4545	61601.7	0	0	61601.7	205942	0	0	205942
1284	UsulutÃ¡n	El Salvador	North America	Central America	13.3434	-88.4343	1990	2030	8	15	FULL	0	2	2	2	0	12.9195	8.93958	12.9195	12.9195	3.97993	0	14.9073	8.93958	14.9073	14.9073	5.96768	0	1.98775	0	1.98775	1.98775	1.98775	0	0.248468	0	0.248468	0.248468	0	25	0	58114.2	48550	58114.2	58114.2	64677.3	49870.3	64677.3	64677.3
1285	Utsunomiya	Japan	Asia	Eastern Asia	36.55	139.889	1975	2030	11	9	FULL	0	0	5	0	5	72.8165	0	0	72.8165	0	72.8165	104.736	0	0	104.736	0	104.736	31.9199	0	0	31.9199	0	31.9199	2.90181	0	0	2.90181	0	0	45.4545	174558	0	0	174558	321425	0	0	321425
1286	Vacaville	United States of America	North America	Northern America	38.3446	-121.969	1990	2030	8	1	PARTIAL	0	0	3	0	3	27.9424	0	0	21.7655	0	21.7655	32.9302	0	0	26.3942	0	26.3942	4.98783	0	0	4.62868	0	4.62868	0.623479	0	0	0.578585	0	0	37.5	56497.2	0	0	43630.6	84427.5	0	0	66532.5
1287	Valencia	Philippines	Asia	South-Eastern Asia	7.9067	125.102	2010	2030	4	3	FULL	3	3	3	0	0	14.9105	14.9105	14.9105	14.9105	0	0	17.8916	17.8916	17.8916	17.8916	0	0	2.9811	2.9811	2.9811	2.9811	0	0	0.745274	0.745274	0.745274	0.745274	75	0	0	67792.9	67792.9	67792.9	67792.9	123179	123179	123179	123179
1288	Valle de Santiago	Mexico	North America	Central America	20.3894	-101.195	2005	2030	5	1	FULL	0	0	3	0	3	11.9447	0	0	11.9447	0	11.9447	14.9312	0	0	14.9312	0	14.9312	2.98654	0	0	2.98654	0	2.98654	0.597309	0	0	0.597309	0	0	60	58035.9	0	0	58035.9	95183.9	0	0	95183.9
1289	Vallejo	United States of America	North America	Northern America	38.1201	-122.242	1985	2030	9	1	PARTIAL	0	0	2	0	2	60.8589	0	0	7.22733	0	7.22733	86.801	0	0	9.15587	0	9.15587	25.9421	0	0	1.92854	0	1.92854	2.88245	0	0	0.214282	0	0	22.2222	98994.6	0	0	5759.88	156483	0	0	10067.5
1290	Van	Turkey	Asia	Western Asia	38.5103	43.3801	1975	2030	11	2	PARTIAL	0	0	8	0	8	20.9619	0	0	4.0644	0	4.0644	66.8765	0	0	22.5287	0	22.5287	45.9146	0	0	18.4643	0	18.4643	4.17405	0	0	1.67858	0	0	72.7273	86638.6	0	0	7694.15	688448	0	0	155713
1291	Vancouver	Canada	North America	Northern America	49.2117	-122.997	1975	2030	11	4	FULL	0	0	11	0	11	398.081	0	0	398.081	0	398.081	650.123	0	0	650.123	0	650.123	252.042	0	0	252.042	0	252.042	22.9129	0	0	22.9129	0	0	100	738634	0	0	738634	2.307e+06	0	0	2.307e+06
1292	Veracruz	Mexico	North America	Central America	19.1732	-96.147	1975	2030	11	3	FULL	0	0	7	0	7	96.6277	0	0	96.6277	0	96.6277	146.433	0	0	146.433	0	146.433	49.8056	0	0	49.8056	0	49.8056	4.52778	0	0	4.52778	0	0	63.6364	269013	0	0	269013	699718	0	0	699718
1293	Verviers	Belgium	Europe	Western Europe	50.5863	5.86193	2005	2030	5	1	FULL	0	0	0	0	0	13.0192	0	0	13.0192	0	13.0192	13.0192	0	0	13.0192	0	13.0192	0	0	0	0	0	0	0	0	0	0	0	0	0	51561.1	0	0	51561.1	52493.7	0	0	52493.7
1294	Vihiga	Kenya	Africa	Eastern Africa	0.085134	34.719	2020	2030	2	1	FULL	0	0	2	0	2	37.7496	0	0	37.7496	0	37.7496	46.6898	0	0	46.6898	0	46.6898	8.9402	0	0	8.9402	0	8.9402	4.4701	0	0	4.4701	0	0	100	77744.7	0	0	77744.7	96451.8	0	0	96451.8
1295	Vihiga	Kenya	Africa	Eastern Africa	0.0310027	34.5846	2020	2030	2	1	FULL	0	0	1	0	1	23.839	0	0	23.839	0	23.839	23.839	0	0	23.839	0	23.839	0	0	0	0	0	0	0	0	0	0	0	0	50	51211.2	0	0	51211.2	53301.7	0	0	53301.7
1297	Villahermosa	Mexico	North America	Central America	17.9837	-92.9376	1985	2030	9	1	FULL	0	0	8	0	8	33.788	0	0	33.788	0	33.788	104.347	0	0	104.347	0	104.347	70.5588	0	0	70.5588	0	70.5588	7.83987	0	0	7.83987	0	0	88.8889	86669.5	0	0	86669.5	532090	0	0	532090
1298	Villanueva	Honduras	North America	Central America	15.3189	-87.9727	2005	2030	5	1	FULL	0	0	3	0	3	14.9057	0	0	14.9057	0	14.9057	24.8434	0	0	24.8434	0	24.8434	9.93771	0	0	9.93771	0	9.93771	1.98754	0	0	1.98754	0	0	60	55891.8	0	0	55891.8	121720	0	0	121720
1299	Virac	Philippines	Asia	South-Eastern Asia	13.586	124.239	2020	2030	2	4	FULL	0	0	1	0	1	23.8495	0	0	23.8495	0	23.8495	29.8105	0	0	29.8105	0	29.8105	5.96104	0	0	5.96104	0	5.96104	2.98052	0	0	2.98052	0	0	50	58197.5	0	0	58197.5	75967.3	0	0	75967.3
1300	Viransehir	Turkey	Asia	Western Asia	37.2339	39.7626	1975	2030	11	1	FULL	0	0	4	0	4	6.98255	0	0	6.98255	0	6.98255	14.9631	0	0	14.9631	0	14.9631	7.98059	0	0	7.98059	0	7.98059	0.725508	0	0	0.725508	0	0	36.3636	54532	0	0	54532	147799	0	0	147799
1301	Vladikavkaz	Russia	Europe	Eastern Europe	43.0542	44.6639	1975	2030	11	1	FULL	0	0	7	0	7	55.9307	0	0	55.9307	0	55.9307	66.9163	0	0	66.9163	0	66.9163	10.9856	0	0	10.9856	0	10.9856	0.998695	0	0	0.998695	0	0	63.6364	273067	0	0	273067	312471	0	0	312471
1302	Vwawa	Tanzania	Africa	Eastern Africa	-9.10768	32.9371	2015	2030	3	3	FULL	0	0	2	0	2	14.8928	0	0	14.8928	0	14.8928	17.8715	0	0	17.8715	0	17.8715	2.97872	0	0	2.97872	0	2.97872	0.992906	0	0	0.992906	0	0	66.6667	53599.9	0	0	53599.9	92401.6	0	0	92401.6
1303	Waled	Indonesia	Asia	South-Eastern Asia	-6.88822	108.721	1975	2030	11	6	FULL	0	0	2	0	2	31.8169	0	0	31.8169	0	31.8169	42.7519	0	0	42.7519	0	42.7519	10.935	0	0	10.935	0	10.935	0.994088	0	0	0.994088	0	0	18.1818	113857	0	0	113857	200327	0	0	200327
1305	Waliso	Ethiopia	Africa	Eastern Africa	8.54501	37.978	2000	2030	6	1	FULL	0	0	4	0	4	10.9243	0	0	10.9243	0	10.9243	21.8497	0	0	21.8497	0	21.8497	10.9254	0	0	10.9254	0	10.9254	1.8209	0	0	1.8209	0	0	66.6667	53336.6	0	0	53336.6	128312	0	0	128312
1306	Warujayeng	Indonesia	Asia	South-Eastern Asia	-7.66344	112.018	2000	2030	6	6	FULL	0	1	2	1	2	25.8195	0	0.821505	25.8195	0.821505	24.998	30.7823	0	0.773116	30.7823	0.773116	30.0091	4.96272	0	0	4.96272	0	5.01111	0.82712	0	0	0.82712	0	16.6667	33.3333	67719.1	0	2833.15	67719.1	72156.9	0	2482.25	72156.9
1308	Wates	Indonesia	Asia	South-Eastern Asia	-7.86057	110.16	1975	2030	11	5	FULL	0	0	4	0	4	7.94355	0	0	7.94355	0	7.94355	25.8194	0	0	25.8194	0	25.8194	17.8758	0	0	17.8758	0	17.8758	1.62508	0	0	1.62508	0	0	36.3636	140431	0	0	140431	99209.4	0	0	99209.4
1309	Welenchete	Ethiopia	Africa	Eastern Africa	8.6608	39.4298	1995	2030	7	9	FULL	0	3	3	3	0	4.96425	0	4.96425	4.96425	4.96425	0	8.93567	0	8.93567	8.93567	8.93567	0	3.97142	0	3.97142	3.97142	3.97142	0	0.567346	0	0.567346	0.567346	0	42.8571	0	56431.6	0	56431.6	56431.6	78717.3	0	78717.3	78717.3
1310	Welkite	Ethiopia	Africa	Eastern Africa	8.29085	37.783	2015	2030	3	1	FULL	0	0	0	0	0	11.9186	0	0	11.9186	0	11.9186	11.9186	0	0	11.9186	0	11.9186	0	0	0	0	0	0	0	0	0	0	0	0	0	53289.2	0	0	53289.2	70271.6	0	0	70271.6
1311	Wenago	Ethiopia	Africa	Eastern Africa	6.32004	38.2604	1995	2030	7	3	FULL	0	0	3	0	3	2.97852	0	0	2.97852	0	2.97852	14.8924	0	0	14.8924	0	14.8924	11.9139	0	0	11.9139	0	11.9139	1.70199	0	0	1.70199	0	0	42.8571	55903.8	0	0	55903.8	67645.2	0	0	67645.2
1312	Wenatchee	United States of America	North America	Northern America	47.4187	-120.307	2020	2030	2	1	PARTIAL	0	0	1	0	1	30.0214	0	0	23.2884	0	23.2884	35.0266	0	0	28.2935	0	28.2935	5.00521	0	0	5.00506	0	5.00506	2.50261	0	0	2.50253	0	0	50	52619	0	0	43155.1	56999.6	0	0	47372.6
1313	Wenchengzhen	China	Asia	Eastern Asia	19.6095	110.752	1995	2030	7	1	FULL	0	0	1	0	1	10.9347	0	0	10.9347	0	10.9347	12.9228	0	0	12.9228	0	12.9228	1.98806	0	0	1.98806	0	1.98806	0.284009	0	0	0.284009	0	0	14.2857	57354.4	0	0	57354.4	57678.8	0	0	57678.8
1314	White Rock	Canada	North America	Northern America	49.0361	-122.822	2000	2030	6	3	FULL	0	0	2	0	2	29.0037	0	0	29.0037	0	29.0037	46.0087	0	0	46.0087	0	46.0087	17.005	0	0	17.005	0	17.005	2.83417	0	0	2.83417	0	0	33.3333	54241.7	0	0	54241.7	97567.8	0	0	97567.8
1315	Wiesbaden	Germany	Europe	Western Europe	50.0278	8.24762	1975	2030	11	1	PARTIAL	0	0	3	0	3	98.0419	0	0	32.5163	0	32.5163	108.047	0	0	38.5192	0	38.5192	10.0048	0	0	6.00292	0	6.00292	0.90953	0	0	0.54572	0	0	27.2727	327066	0	0	121804	413264	0	0	153166
1319	Wolayita	Ethiopia	Africa	Eastern Africa	7.13839	37.5842	1995	2030	7	3	FULL	0	0	2	0	2	3.97321	0	0	3.97321	0	3.97321	5.95991	0	0	5.95991	0	5.95991	1.9867	0	0	1.9867	0	1.9867	0.283814	0	0	0.283814	0	0	28.5714	55883.8	0	0	55883.8	53481.2	0	0	53481.2
1321	Woldia	Ethiopia	Africa	Eastern Africa	11.8291	39.5941	1975	2030	11	2	FULL	0	0	5	0	5	7.94547	0	0	7.94547	0	7.94547	16.8841	0	0	16.8841	0	16.8841	8.93862	0	0	8.93862	0	8.93862	0.812602	0	0	0.812602	0	0	45.4545	64820	0	0	64820	149562	0	0	149562
1322	Wonogiri	Indonesia	Asia	South-Eastern Asia	-7.81074	110.921	1975	2030	11	4	FULL	0	0	3	0	3	17.8693	0	0	17.8693	0	17.8693	19.855	0	0	19.855	0	19.855	1.98563	0	0	1.98563	0	1.98563	0.180512	0	0	0.180512	0	0	27.2727	202820	0	0	202820	88046.1	0	0	88046.1
1323	Wonosari	Indonesia	Asia	South-Eastern Asia	-7.96168	110.596	1975	2030	11	5	FULL	0	0	3	0	3	16.8771	0	0	16.8771	0	16.8771	22.8344	0	0	22.8344	0	22.8344	5.95727	0	0	5.95727	0	5.95727	0.54157	0	0	0.54157	0	0	27.2727	152763	0	0	152763	85271.1	0	0	85271.1
1324	Wonosobo	Indonesia	Asia	South-Eastern Asia	-7.36658	109.937	1975	2030	11	6	FULL	4	4	4	4	0	44.6877	19.1789	44.6877	44.6877	25.5087	0	59.5835	28.8915	59.5835	59.5835	30.692	0	14.8958	9.71254	14.8958	14.8958	5.18325	0	1.35416	0.882958	1.35416	1.35416	36.3636	36.3636	0	300232	65158	300232	300232	250092	75494.6	250092	250092
1325	Wonsan	North Korea	Asia	Eastern Asia	39.1524	127.452	1975	2030	11	1	FULL	0	0	4	0	4	30.9449	0	0	30.9449	0	30.9449	41.9271	0	0	41.9271	0	41.9271	10.9821	0	0	10.9821	0	10.9821	0.998377	0	0	0.998377	0	0	36.3636	276237	0	0	276237	383564	0	0	383564
1326	Woodland	United States of America	North America	Northern America	38.6757	-121.768	2015	2030	3	1	FULL	0	0	0	0	0	22.9516	0	0	22.9516	0	22.9516	22.9516	0	0	22.9516	0	22.9516	0	0	0	0	0	0	0	0	0	0	0	0	0	52217.8	0	0	52217.8	55331.1	0	0	55331.1
1327	Wukro	Ethiopia	Africa	Eastern Africa	13.788	39.6018	2000	2030	6	2	FULL	0	0	2	0	2	5.96022	0	0	5.96022	0	5.96022	7.94706	0	0	7.94706	0	7.94706	1.98683	0	0	1.98683	0	1.98683	0.331139	0	0	0.331139	0	0	33.3333	52265.2	0	0	52265.2	69383.9	0	0	69383.9
1328	Wum	Cameroon	Africa	Middle Africa	6.3903	10.0756	1990	2030	8	1	FULL	0	0	3	0	3	6.95117	0	0	6.95117	0	6.95117	10.9232	0	0	10.9232	0	10.9232	3.97205	0	0	3.97205	0	3.97205	0.496506	0	0	0.496506	0	0	37.5	52735.8	0	0	52735.8	65461.4	0	0	65461.4
1330	Xalapa	Mexico	North America	Central America	19.5466	-96.9209	1975	2030	11	8	FULL	0	8	8	8	0	41.7972	0	41.7972	41.7972	41.7972	0	82.598	0	82.598	82.598	82.598	0	40.8008	0	40.8008	40.8008	40.8008	0	3.70917	0	3.70917	3.70917	0	72.7273	0	119759	0	119759	119759	590535	0	590535	590535
1331	Xicotepec	Mexico	North America	Central America	20.2676	-97.958	2025	2030	1	1	FULL	0	0	0	0	0	12.9266	0	0	12.9266	0	12.9266	12.9266	0	0	12.9266	0	12.9266	0	0	0	0	0	0	0	0	0	0	0	0	0	50753.8	0	0	50753.8	51463.7	0	0	51463.7
1332	Xiuying District	China	Asia	Eastern Asia	20.0162	110.322	1975	2030	11	1	FULL	8	9	9	9	0	88.4842	0	88.4842	88.4842	88.4842	0	189.891	26.0973	189.891	189.891	163.793	0	101.407	26.0973	101.407	101.407	75.3092	0	9.21878	2.37248	9.21878	9.21878	72.7273	81.8182	0	377789	0	377789	377789	1.28025e+06	164275	1.28025e+06	1.28025e+06
1333	Xuwen	China	Asia	Eastern Asia	20.33	110.171	1975	2030	11	1	FULL	0	0	7	0	7	10.9382	0	0	10.9382	0	10.9382	29.8287	0	0	29.8287	0	29.8287	18.8904	0	0	18.8904	0	18.8904	1.71731	0	0	1.71731	0	0	63.6364	95033.6	0	0	95033.6	206997	0	0	206997
1334	Yakima	United States of America	North America	Northern America	46.5908	-120.522	1990	2030	8	2	FULL	0	0	5	0	5	36.0172	0	0	36.0172	0	36.0172	51.024	0	0	51.024	0	51.024	15.0068	0	0	15.0068	0	15.0068	1.87585	0	0	1.87585	0	0	62.5	54649.8	0	0	54649.8	101897	0	0	101897
1335	Yamagata	Japan	Asia	Eastern Asia	38.2503	140.333	1975	2030	11	8	FULL	0	4	4	4	0	31.9273	0	31.9273	31.9273	31.9273	0	46.8926	0	46.8926	46.8926	46.8926	0	14.9653	0	14.9653	14.9653	14.9653	0	1.36048	0	1.36048	1.36048	0	36.3636	0	108420	0	108420	108420	156546	0	156546	156546
1336	Yamaguchi	Japan	Asia	Eastern Asia	34.1687	131.468	1995	2030	7	2	FULL	0	0	1	0	1	26.9462	0	0	26.9462	0	26.9462	27.9444	0	0	27.9444	0	27.9444	0.998171	0	0	0.998171	0	0.998171	0.142596	0	0	0.142596	0	0	14.2857	81340.4	0	0	81340.4	72188.9	0	0	72188.9
1337	Yame	Japan	Asia	Eastern Asia	33.2234	130.535	2010	2030	4	4	FULL	0	0	0	0	0	41.875	0	0	41.875	0	41.875	32.9019	0	0	32.9019	0	32.9019	-8.97311	0	0	-8.97311	0	-8.97311	-2.24328	0	0	-2.24328	0	0	0	76827.8	0	0	76827.8	64098	0	0	64098
1338	Yangju	South Korea	Asia	Eastern Asia	37.8064	127.09	2025	2030	1	1	FULL	0	0	0	0	0	14.9729	0	0	14.9729	0	14.9729	14.9729	0	0	14.9729	0	14.9729	0	0	0	0	0	0	0	0	0	0	0	0	0	51981	0	0	51981	54878.1	0	0	54878.1
1339	Yarim	Yemen	Asia	Western Asia	14.2976	44.3775	1975	2030	11	1	FULL	0	0	4	0	4	6.95417	0	0	6.95417	0	6.95417	11.921	0	0	11.921	0	11.921	4.96684	0	0	4.96684	0	4.96684	0.451531	0	0	0.451531	0	0	36.3636	70302.6	0	0	70302.6	274122	0	0	274122
1340	Yatsushiro	Japan	Asia	Eastern Asia	32.5045	130.606	1975	2030	11	6	FULL	0	0	4	0	4	25.9206	0	0	25.9206	0	25.9206	29.9076	0	0	29.9076	0	29.9076	3.98703	0	0	3.98703	0	3.98703	0.362458	0	0	0.362458	0	0	36.3636	82359.8	0	0	82359.8	66396.8	0	0	66396.8
1341	Yerevan	Armenia	Asia	Western Asia	40.1709	44.5009	1975	2030	11	6	FULL	0	0	5	0	5	161.694	0	0	161.694	0	161.694	198.624	0	0	198.624	0	198.624	36.9294	0	0	36.9294	0	36.9294	3.35722	0	0	3.35722	0	0	45.4545	973476	0	0	973476	1.04149e+06	0	0	1.04149e+06
1342	Yessentuki	Russia	Europe	Eastern Europe	44.0407	42.865	1975	2030	11	1	FULL	0	0	5	0	5	22.9941	0	0	22.9941	0	22.9941	31.9887	0	0	31.9887	0	31.9887	8.99465	0	0	8.99465	0	8.99465	0.817696	0	0	0.817696	0	0	45.4545	82467.6	0	0	82467.6	119864	0	0	119864
1343	Yilan City	Taiwan	Asia	Eastern Asia	24.7516	121.748	1975	2030	11	2	FULL	0	2	2	2	0	21.8953	0	21.8953	21.8953	21.8953	0	17.9142	0	17.9142	17.9142	17.9142	0	-3.98109	0	-3.98109	-3.98109	-3.98109	0	-0.361917	0	-0.361917	-0.361917	0	18.1818	0	130443	0	130443	130443	69932.4	0	69932.4	69932.4
1344	Yingjiang County	China	Asia	Eastern Asia	24.7077	97.9395	1980	2030	10	1	FULL	0	0	1	0	1	8.95608	0	0	8.95608	0	8.95608	10.9463	0	0	10.9463	0	10.9463	1.99026	0	0	1.99026	0	1.99026	0.199026	0	0	0.199026	0	0	10	50790.2	0	0	50790.2	50169.9	0	0	50169.9
1345	Yirga Cheffe	Ethiopia	Africa	Eastern Africa	6.15927	38.2014	1975	2030	11	2	FULL	0	0	5	0	5	3.97142	0	0	3.97142	0	3.97142	28.7925	0	0	28.7925	0	28.7925	24.8211	0	0	24.8211	0	24.8211	2.25646	0	0	2.25646	0	0	45.4545	67818.8	0	0	67818.8	136820	0	0	136820
1346	Yogyakarta	Indonesia	Asia	South-Eastern Asia	-7.7564	110.48	1975	2030	11	6	FULL	0	8	8	8	7	348.486	0	226.725	348.486	226.725	121.761	631.45	0	396.626	631.45	396.626	234.824	282.963	0	169.901	282.963	169.901	113.063	25.7239	0	15.4455	25.7239	0	72.7273	63.6364	1.73454e+06	0	1.12126e+06	1.73454e+06	2.72924e+06	0	1.60912e+06	2.72924e+06
1347	Yonago	Japan	Asia	Eastern Asia	35.4469	133.342	1975	2030	11	1	FULL	0	0	2	0	2	49.8794	0	0	49.8794	0	49.8794	46.8858	0	0	46.8858	0	46.8858	-2.99366	0	0	-2.99366	0	-2.99366	-0.272151	0	0	-0.272151	0	0	18.1818	154564	0	0	154564	107694	0	0	107694
1349	Yuba City	United States of America	North America	Northern America	39.1305	-121.633	2010	2030	4	1	PARTIAL	0	0	0	0	0	26.9503	0	0	13.0327	0	13.0327	27.9485	0	0	13.0327	0	13.0327	0.998158	0	0	0	0	0	0.249539	0	0	0	0	0	0	53023.9	0	0	22195.1	63450.9	0	0	25964.1
1350	Yuma	United States of America	North America	Northern America	32.6965	-114.64	2000	2030	6	1	FULL	0	0	2	0	2	30.9259	0	0	30.9259	0	30.9259	38.9066	0	0	38.9066	0	38.9066	7.9807	0	0	7.9807	0	7.9807	1.33012	0	0	1.33012	0	0	33.3333	53474.9	0	0	53474.9	69240	0	0	69240
1352	Zabid	Yemen	Asia	Western Asia	14.1954	43.3178	2000	2030	6	2	FULL	0	0	2	0	2	4.97066	0	0	4.97066	0	4.97066	6.95867	0	0	6.95867	0	6.95867	1.988	0	0	1.988	0	1.988	0.331334	0	0	0.331334	0	0	33.3333	50425.5	0	0	50425.5	94987.9	0	0	94987.9
1353	Zacapu	Mexico	North America	Central America	19.8111	-101.793	2025	2030	1	1	FULL	0	0	0	0	0	10.958	10.958	10.958	10.958	0	0	10.958	10.958	10.958	10.958	0	0	0	0	0	0	0	0	0	0	0	0	0	0	0	52470.9	52470.9	52470.9	52470.9	54412.1	54412.1	54412.1	54412.1
1354	Zacatecoluca	El Salvador	North America	Central America	13.5073	-88.8795	1995	2030	7	18	FULL	1	2	2	1	0	8.94798	1.64874	8.94798	8.94798	7.29924	0	10.9363	2.56593	10.9363	10.9363	8.37033	0	1.98828	0.917193	1.98828	1.98828	1.07109	0	0.28404	0.131028	0.28404	0.28404	14.2857	14.2857	0	55226.9	10637	55226.9	55226.9	64208.3	12965.4	64208.3	64208.3
1355	Zacatelco	Mexico	North America	Central America	19.207	-98.2399	2005	2030	5	8	FULL	0	3	3	3	0	15.9077	0	15.9077	15.9077	15.9077	0	52.6908	0	52.6908	52.6908	52.6908	0	36.7831	0	36.7831	36.7831	36.7831	0	7.35663	0	7.35663	7.35663	0	60	0	52102.5	0	52102.5	52102.5	139087	0	139087	139087
1357	Zalingei	Sudan	Africa	Northern Africa	12.912	23.468	1975	2030	11	1	FULL	0	0	2	0	2	10.9444	0	0	10.9444	0	10.9444	11.9393	0	0	11.9393	0	11.9393	0.99489	0	0	0.99489	0	0.99489	0.0904445	0	0	0.0904445	0	0	18.1818	72263.5	0	0	72263.5	56390.1	0	0	56390.1
1358	Zalmat Hubaysh	Yemen	Asia	Western Asia	14.1016	44.0904	2020	2030	2	1	FULL	0	0	2	0	2	2.98061	0	0	2.98061	0	2.98061	5.96121	0	0	5.96121	0	5.96121	2.9806	0	0	2.9806	0	2.9806	1.4903	0	0	1.4903	0	0	100	60338.1	0	0	60338.1	80148.1	0	0	80148.1
1359	Zamora	Mexico	North America	Central America	19.9879	-102.285	1980	2030	10	1	FULL	0	0	3	0	3	15.9374	0	0	15.9374	0	15.9374	22.9095	0	0	22.9095	0	22.9095	6.97212	0	0	6.97212	0	6.97212	0.697212	0	0	0.697212	0	0	30	51997.7	0	0	51997.7	133082	0	0	133082
1362	Zhanjiang	China	Asia	Eastern Asia	20.8163	110.081	2025	2030	1	1	PARTIAL	0	0	0	0	0	10.9384	0	0	1.68969	0	1.68969	10.9384	0	0	1.68969	0	1.68969	0	0	0	0	0	0	0	0	0	0	0	0	0	55390.8	0	0	8995.5	56456.7	0	0	9127.43
1363	Zhudong	Taiwan	Asia	Eastern Asia	24.732	121.091	2020	2030	2	2	FULL	0	0	0	0	0	8.96171	0	0	8.96171	0	8.96171	8.96171	0	0	8.96171	0	8.96171	0	0	0	0	0	0	0	0	0	0	0	0	0	50685.1	0	0	50685.1	52313.6	0	0	52313.6
1364	ZitÃ¡cuaro	Mexico	North America	Central America	19.4335	-100.354	1995	2030	7	3	FULL	2	4	4	3	0	13.922	2.71268	13.922	13.922	11.2094	0	19.889	5.79242	19.889	19.889	14.0965	0	5.96692	3.07974	5.96692	5.96692	2.88718	0	0.852417	0.439963	0.852417	0.852417	28.5714	42.8571	0	56572	5988.66	56572	56572	116591	14519.2	116591	116591
1365	Ziway	Ethiopia	Africa	Eastern Africa	7.91942	38.7225	2000	2030	6	10	FULL	0	4	4	4	0	15.8846	0	15.8846	15.8846	15.8846	0	19.8557	0	19.8557	19.8557	19.8557	0	3.97111	0	3.97111	3.97111	3.97111	0	0.661852	0	0.661852	0.661852	0	66.6667	0	53519.4	0	53519.4	53519.4	236316	0	236316	236316
1366	Zumpango	Mexico	North America	Central America	19.7938	-99.0943	2010	2030	4	5	FULL	0	0	1	0	1	21.8689	0	0	21.8689	0	21.8689	22.8632	0	0	22.8632	0	22.8632	0.99432	0	0	0.99432	0	0.99432	0.24858	0	0	0.24858	0	0	25	55005.7	0	0	55005.7	66544.2	0	0	66544.2
[truncated: 16 more columns]

## Sheet: Column Names
Rate of change in area is in square kilometres per 5 years
Frequency is as a percentage of 5-year periods between YOB and YOD
Rate of change in population is in persons per 5 years
Rate of change in population density is persons per square kilometres per 5 years
Column Name	Description
city_ID	Unique ID assigned to city in alphabetical order
City	Name of city assigned, based on GHS-UCDB and/or GHS-DUC
Country	Country city is located, based on Natural Earth
Continent	Continent city is located, based on Natural Earth
Subregion	Subregion city is located, based on Natural Earth
Latitude	Latitude of city centroid in EPSG:4326 when city was first exposed
Longitude	Longitude of city centroid in EPSG:4326 when city was first exposed
YOB	[Initial] Year that city was first exposed
YOD	[Final] Year that city was last exposed (or 2030 when analysis period ends)
Nyears	Number of 5-year periods between YOB and YOD
Nvolc_100km	Number of volcanoes within 100 km of city (with reference to year with largest extent)
Within	Indicates if city is fully (FULL) or partially within (PARTIAL) 100 km of a voclano
Ninc_10km	Number of times city area within 10 km increased between YOB and YOD
Ninc_30km	Number of times city area within 30 km increased between YOB and YOD
Ninc_100km	Number of times city area within 100 km increased between YOB and YOD
Ninc_10to30km	Number of times city area within 10 to 30 km increased between YOB and YOD
Ninc_30to100km	Number of times city area within 30 to 100 km increased between YOB and YOD
ICA_total	Initial total area of city
ICA_10km	Initial city area within 10 km
ICA_30km	Initial city area within 30 km
ICA_100km	Initial city area within 100 km
ICA_10to30km	Initial city area within 10 to 30 km
ICA_30to100km	Initial city area within 30 to 100 km
FCA_total	Final total area of city
FCA_10km	Final city area within 10 km
FCA_30km	Final city area within 30 km
FCA_100km	Final city area within 100 km
FCA_10to30km	Final city area within 10 to 30 km
FCA_30to100km	Final city area within 30 to 100 km
CCA_total	Change in total city area between YOB and YOD
CCA_10km	Change in city area within 10 km between YOB and YOD
CCA_30km	Change in city area within 30 km between YOB and YOD
CCA_100km	Change in city area within 100 km between YOB and YOD
CCA_10to30km	Change in city area within 10 to 30 km between YOB and YOD
CCA_30to100km	Change in city area within 30 to 100 km between YOB and YOD
ACA_total	Average change in total city area per 5 years between YOB and YOD
ACA_10km	Average change in city area within 10 km per 5 years between YOB and YOD
ACA_30km	Average change in city area within 30 km per 5 years between YOB and YOD
ACA_100km	Average change in city area within 100 km per 5 years between YOB and YOD
Freq_10km	Frequency of increase in area within 10 km between YOB and YOD
Freq_10to30km	Frequency of increase in area within 10 to 30 km between YOB and YOD
Freq_30to100km	Frequency of increase in area within 30 to 100 km between YOB and YOD
IPOP_total	Initial total city population
IPOP_10km	Initial city population within 10 km
IPOP_30km	Initial city population within 30 km
IPOP_100km	Initial city population within 100 km
FPOP_total	Final total city population
FPOP_10km	Final city population within 10 km
FPOP_30km	Final city population within 30 km
FPOP_100km	Final city population within 100 km
IDEN_total	Initial population density for entire city
IDEN_10km	Initial population density for area within 10 km
IDEN_30km	Initial population density for area within 30 km
IDEN_100km	Initial population density for area within 100 km
FDEN_total	Final population density for entire city
FDEN_10km	Final population density for area within 10 km
FDEN_30km	Final population density for area within 30 km
FDEN_100km	Final population density for area within 100 km
APOP_total	Average change in total city population per 5 years between YOB and YOD
APOP_10km	Average change in city population within 10 km per 5 years between YOB and YOD
APOP_30km	Average change in city population within 30 km per 5 years between YOB and YOD
APOP_100km	Average change in city population within 100 km per 5 years between YOB and YOD
ADEN_total	Average change in population density per 5 years between YOB and YOD for entire city
ADEN_10km	Average change in population density per 5 years between YOB and YOD for area within 10 km
ADEN_30km	Average change in population density per 5 years between YOB and YOD for area within 30 km
ADEN_100km	Average change in population density per 5 years between YOB and YOD for area within 100 km
