# Supplementary material for: Cities near volcanoes are increasingly threatened by volcanic hazards
Source: Research Square preprint supplement (doi:10.21203/rs.3.rs-8315006/v1), 2025-12-10
Supplement: Supplementary file 2 [file 8a092aa4757fc1a402f03bf3.xlsx]

## Sheet: 1975
Supplementary Material 2: City-level population exposure metrics to volcanic hazards. Each tab refers to each year from 1975 to 2030. Each row gives each city whose footprints intersect volcanic distance bands (10, 20, 30, 40, 50, 60, 70, 80, 90, and 100 km) from active volcanoes.
For each city, the dataset includes administrative attributes (city ID, name, country, subregion, continent), geographic characteristics (area, latitude, longitude), and total population (Ttl_Ppl).
Population, area (Area), and population density (Dens) are reported for each concentric distance band (e.g., 100–90 km, 90–80 km, …, 20–10 km) and within 10 km (Pp_10km). Values represent intersected portions of the city footprint within each distance zone.
city_ID	Name	Country	Subregion	Area_km2	Lat	Lon	Continent	Ttl_Ppl	100to90	90to80	80to70	70to60	60to50	50to40	40to30	30to20	20to10	Pp_10km	Area100to90	Area90to80	Area80to70	Area70to60	Area60to50	Area50to40	Area40to30	Area30to20	Area20to10	Ar_10_2	Dens100to90	Dens90to80	Dens80to70	Dens70to60	Dens60to50	Dens50to40	Dens40to30	Dens30to20	Dens20to10	Dens10
226	Chinandega	Nicaragua	Central America	8.94547e+06	-8601500	1556500	North America	81699.1	0	0	0	0	0	0	0	0	81699.1	0	0	0	0	0	0	0	0	0	9	0	0	0	0	0	0	0	0	0	9077.67	0
75	Arica	Chile	South America	1.59143e+07	-6818750	-2269938	South America	76522.1	76522.1	0	0	0	0	0	0	0	0	0	16	0	0	0	0	0	0	0	0	0	4782.63	0	0	0	0	0	0	0	0	0
341	Fort-de-France	Martinique	0	4.17544e+07	-5997357	1799619	Europe	128452	0	0	0	0	0	0	0	128452	0.175773	0	0	0	0	0	0	0	0	41.9848	0.0152241	0	0	0	0	0	0	0	0	3059.48	11.5457	0
944	Reykjavik	Iceland	Northern Europe	4.31789e+07	-1301221	7262360	Europe	72604.9	0	0	0	0	0	0	0	62724.6	9880.33	0	0	0	0	0	0	0	0	37.6045	5.39547	0	0	0	0	0	0	0	0	1668.01	1831.23	0
3	Aachen	Germany	Western Europe	4.80641e+07	459917	5954542	Europe	197643	3350.44	194182	110.871	0	0	0	0	0	0	0	1.37711	46.5553	0.0675474	0	0	0	0	0	0	0	2432.94	4170.99	1641.38	0	0	0	0	0	0	0
656	Luxembourg	Luxembourg	Western Europe	2.10224e+07	468833	5832976	Europe	68165.6	0	55299.6	12866	0	0	0	0	0	0	0	0	12.9069	8.09314	0	0	0	0	0	0	0	0	4284.51	1589.74	0	0	0	0	0	0	0
628	Limbe	Cameroon	Middle Africa	1.39072e+07	921214	496357	Africa	51121.9	0	0	0	0	0	0	0	48101.2	3020.69	0	0	0	0	0	0	0	0	12.3722	1.62777	0	0	0	0	0	0	0	0	3887.84	1855.72	0
395	Gyumri	Armenia	Western Asia	2.69732e+07	3696981	4877574	Asia	187898	0	0	0	0	0	164666	23231.9	0	0	0	0	0	0	0	0	20.1014	6.89857	0	0	0	0	0	0	0	0	8191.77	3367.63	0	0	0
836	Otaru	Japan	Eastern Asia	3.29857e+07	11610288	5143106	Asia	127612	0	0	0	0	0	127612	0	0	0	0	0	0	0	0	0	33	0	0	0	0	0	0	0	0	0	3867.02	0	0	0	0
1053	Sonsonate	El Salvador	Central America	1.29227e+07	-8833115	1690192	North America	77675	0	0	0	0	0	0	0	0	77675	0	0	0	0	0	0	0	0	0	13	0	0	0	0	0	0	0	0	0	5975	0
622	León	Nicaragua	Central America	1.39149e+07	-8580571	1533286	North America	120570	0	0	0	0	0	0	0	30209.4	90360.1	0	0	0	0	0	0	0	0	3.43457	10.5654	0	0	0	0	0	0	0	0	8795.68	8552.43	0
721	Mendoza	Argentina	South America	1.39614e+08	-6189650	-3982021	South America	468066	7607.26	0	0	0	0	0	0	0	0	0	4.72175	0	0	0	0	0	0	0	0	0	1611.11	0	0	0	0	0	0	0	0	0
494	João Teves	Cabo Verde	Western Africa	1.29247e+07	-2314115	1854423	Africa	71936.5	0	67872.5	4064	0	0	0	0	0	0	0	0	11.2642	1.73578	0	0	0	0	0	0	0	0	6025.49	2341.31	0	0	0	0	0	0	0
1237	Yerevan	Armenia	Western Asia	1.61816e+08	3773426	4808488	Asia	973476	0	0	0	0	0	755315	218161	0	0	0	0	0	0	0	0	132.361	29.6386	0	0	0	0	0	0	0	0	5706.46	7360.71	0	0	0
340	Fomboni	Comoros	Eastern Africa	8.94517e+06	4321722	-1514167	Africa	77353.5	0	0	74840.8	2512.71	0	0	0	0	0	0	0	0	5.79901	3.20099	0	0	0	0	0	0	0	0	12905.8	784.978	0	0	0	0	0	0
1039	Sigli	Indonesia	South-Eastern Asia	1.98684e+07	9590700	664400	Asia	99050.7	0	0	0	99050.7	0	0	0	0	0	0	0	0	0	20	0	0	0	0	0	0	0	0	0	4952.53	0	0	0	0	0	0
1018	Seoul	South Korea	Eastern Asia	9.8128e+08	11018651	4506901	Asia	10122208	3.72475e+06	2.58159e+06	473114	40343.1	0	0	0	0	0	0	279.526	175.697	35.5224	7.34788	0	0	0	0	0	0	13325.2	14693.4	13318.8	5490.44	0	0	0	0	0	0
1007	Sapporo	Japan	Eastern Asia	2.95863e+08	11654189	5129686	Asia	1.50617e+06	0	0	0	0	80408	997700	428058	0	0	0	0	0	0	0	29.0534	171.739	95.2077	0	0	0	0	0	0	0	2767.6	5809.4	4496.04	0	0	0
1192	Vancouver	Canada	Northern America	3.98387e+08	-9451445	5790668	North America	738634	0	52057.6	302949	383628	0	0	0	0	0	0	0	27.687	190.811	179.502	0	0	0	0	0	0	0	1880.21	1587.69	2137.18	0	0	0	0	0	0
674	Managua	Nicaragua	Central America	9.93893e+07	-8524560	1495990	North America	431881	0	0	0	0	0	0	0	0	142720	289161	0	0	0	0	0	0	0	0	34.3405	65.6595	0	0	0	0	0	0	0	0	4156.01	4403.95
979	San José	Costa Rica	Central America	2.11658e+08	-8348735	1226322	North America	623036	0	0	0	0	0	0	885.812	436828	185323	0	0	0	0	0	0	0	0.762757	123.058	89.1793	0	0	0	0	0	0	0	1161.33	3549.77	2078.09	0
997	Santa Cruz de Tenerife	Spain	Southern Europe	4.98165e+07	-1507440	3462020	Europe	234920	0	0	0	0	0	152833	82087.4	0	0	0	0	0	0	0	0	23.7028	26.2972	0	0	0	0	0	0	0	0	6447.87	3121.53	0	0	0
1107	Tbilisi	Georgia	Western Asia	1.29899e+08	3745631	4980331	Asia	884067	742304	50193.6	0	0	0	0	0	0	0	0	98.6329	9.46336	0	0	0	0	0	0	0	0	7525.93	5303.99	0	0	0	0	0	0	0	0
359	Ganja	Azerbaijan	Western Asia	4.29562e+07	3911849	4865872	Asia	238004	102545	135459	0	0	0	0	0	0	0	0	20.9965	22.0035	0	0	0	0	0	0	0	0	4883.92	6156.23	0	0	0	0	0	0	0	0
429	Hodeidah	Yemen	Western Asia	1.6901e+07	4215559	1821971	Asia	135611	0	135611	0	0	0	0	0	0	0	0	0	17	0	0	0	0	0	0	0	0	0	7977.12	0	0	0	0	0	0	0	0
302	Djibouti	Djibouti	Eastern Africa	2.38522e+07	4269583	1429083	Africa	75816.4	0	0	75816.4	0	0	0	0	0	0	0	0	0	24	0	0	0	0	0	0	0	0	0	3159.02	0	0	0	0	0	0	0
961	Saint-Denis	Réunion	Western Europe	1.8905e+07	5330395	-2560868	Europe	101668	0	0	0	0	0	101668	0	0	0	0	0	0	0	0	0.18945	18.8106	0	0	0	0	0	0	0	0	0	5404.81	0	0	0	0
726	Meulaboh	Indonesia	South-Eastern Asia	1.19205e+07	9618667	512167	Asia	102871	0	102871	0	0	0	0	0	0	0	0	0	12	0	0	0	0	0	0	0	0	0	8572.59	0	0	0	0	0	0	0	0
436	Hsinchu	Taiwan	Eastern Asia	6.27261e+07	11420690	3031770	Asia	309483	0	0	149584	159898	0	0	0	0	0	0	0	0	27.1735	35.8265	0	0	0	0	0	0	0	0	5504.79	4463.13	0	0	0	0	0	0
524	Karatsu	Japan	Eastern Asia	2.69287e+07	11643315	4045130	Asia	74184.8	0	63728.3	10456.6	0	0	0	0	0	0	0	0	22.8062	4.19382	0	0	0	0	0	0	0	0	2794.34	2493.33	0	0	0	0	0	0	0
995	Santa Ana	El Salvador	Central America	2.18698e+07	-8810318	1722545	North America	189692	0	0	0	0	0	0	0	0	157125	32566.9	0	0	0	0	0	0	0	0	17.496	4.504	0	0	0	0	0	0	0	0	8980.62	7230.68
987	San Pedro Sula	Honduras	Central America	3.77818e+07	-8622289	1908526	North America	185463	0	0	0	85690.9	99771.9	0	0	0	0	0	0	0	0	20.6784	17.3216	0	0	0	0	0	0	0	0	4143.98	5759.97	0	0	0	0	0
335	Esteli	Nicaragua	Central America	8.94589e+06	-8515389	1613167	North America	54405.2	0	0	54405.2	0	0	0	0	0	0	0	0	0	9	0	0	0	0	0	0	0	0	0	6045.02	0	0	0	0	0	0	0
203	Cartago	Costa Rica	Central America	2.48424e+07	-8334220	1216620	North America	83838.2	0	0	0	0	0	0	0	0	83838.2	0	0	0	0	0	0	0	0	0	25	0	0	0	0	0	0	0	0	0	3353.53	0
878	Pasto	Colombia	South America	2.38395e+07	-7743958	149708	South America	147028	0	0	0	0	0	0	0	0	89548.8	57479	0	0	0	0	0	0	0	0	13.7671	10.2329	0	0	0	0	0	0	0	0	6504.55	5617.09
557	Kigali	Rwanda	Eastern Africa	4.17195e+07	3013548	-241810	Africa	69468.9	0	5926.44	63542.5	0	0	0	0	0	0	0	0	7.23592	34.7641	0	0	0	0	0	0	0	0	819.03	1827.82	0	0	0	0	0	0	0
162	Bireuen	Indonesia	South-Eastern Asia	1.58946e+07	9667062	642688	Asia	130111	0	0	0	0	38064.7	92046.1	0	0	0	0	0	0	0	0	6.24641	9.75359	0	0	0	0	0	0	0	0	6093.85	9437.16	0	0	0	0
1150	Toufen	Taiwan	Eastern Asia	2.88732e+07	11418466	3015431	Asia	134212	9155.31	125057	0	0	0	0	0	0	0	0	3.58295	25.417	0	0	0	0	0	0	0	0	2555.24	4920.21	0	0	0	0	0	0	0	0
1009	Sasebo	Japan	Eastern Asia	3.19135e+07	11645219	4012188	Asia	91875	0	0	45538.3	46336.7	0	0	0	0	0	0	0	0	14.3213	17.6787	0	0	0	0	0	0	0	0	3179.75	2621.05	0	0	0	0	0	0
690	Masaya	Nicaragua	Central America	1.29204e+07	-8512192	1476577	North America	67072.6	0	0	0	0	0	0	0	0	757.258	66315.4	0	0	0	0	0	0	0	0	0.920193	12.0798	0	0	0	0	0	0	0	0	822.933	5489.77
612	Las Palmas de Gran Canaria	Spain	Southern Europe	4.08469e+07	-1431207	3421988	Europe	266885	0	0	0	0	0	0	0	63718	203167	0	0	0	0	0	0	0	0	12.6341	28.3659	0	0	0	0	0	0	0	0	5043.33	7162.38	0
594	Kumba	Cameroon	Middle Africa	1.98678e+07	944800	572750	Africa	109567	0	0	0	0	0	0	109564	2.89966	0	0	0	0	0	0	0	0	19.9172	0.0827957	0	0	0	0	0	0	0	0	5500.99	35.0219	0	0
1090	Takengon	Indonesia	South-Eastern Asia	1.19207e+07	9686750	572167	Asia	82785.2	0	0	0	0	0	0	0	0	82785.2	0	0	0	0	0	0	0	0	0	12	0	0	0	0	0	0	0	0	0	6898.77	0
729	Miaoli	Taiwan	Eastern Asia	1.99121e+07	11420150	2999950	Asia	104772	38586.2	0	0	0	0	0	0	0	0	0	6.58183	0	0	0	0	0	0	0	0	0	5862.53	0	0	0	0	0	0	0	0	0
91	Asahikawa	Japan	Eastern Asia	6.69801e+07	11651470	5207396	Asia	213372	0	0	0	0	0	106200	107172	0	0	0	0	0	0	0	0	37.1396	29.8604	0	0	0	0	0	0	0	0	2859.48	3589.1	0	0	0
312	Douala	Cameroon	Middle Africa	1.28145e+08	973864	500911	Africa	401131	0	0	36542.7	319853	44735.8	0	0	0	0	0	0	0	13.6733	93.8809	21.4458	0	0	0	0	0	0	0	2672.55	3407.01	2085.99	0	0	0	0	0
99	Athens	Greece	Southern Europe	3.91359e+08	2052245	4563707	Europe	2.93101e+06	0	0	0	554563	1.53218e+06	844264	0	0	0	0	0	0	0	125.8	141.048	125.152	0	0	0	0	0	0	0	4408.3	10862.8	6745.91	0	0	0	0
624	Lhokseumawe	Indonesia	South-Eastern Asia	1.58946e+07	9711188	640312	Asia	59433.2	0	0	0	0	59433.2	0	0	0	0	0	0	0	0	0.240349	15.7597	0	0	0	0	0	0	0	0	0	3771.23	0	0	0	0	0
351	Fukuoka	Japan	Eastern Asia	3.85991e+08	11671415	4063146	Asia	1.83407e+06	931129	848392	13507.8	0	0	0	0	0	0	0	192.277	163.869	5.6792	0	0	0	0	0	0	0	4842.65	5177.26	2378.47	0	0	0	0	0	0	0
988	San Salvador	El Salvador	Central America	1.4712e+08	-8780872	1687662	North America	974923	0	0	0	0	0	0	0	0	533862	441061	0	0	0	0	0	0	0	0	71.4459	76.5541	0	0	0	0	0	0	0	0	7472.25	5761.43
384	Granada	Nicaragua	Central America	1.19265e+07	-8499250	1471250	North America	70434.7	0	0	0	0	0	0	0	0	0	70434.7	0	0	0	0	0	0	0	0	0	12	0	0	0	0	0	0	0	0	0	5869.56
904	Popayán	Colombia	South America	1.68866e+07	-7673912	302265	South America	79166.9	0	0	0	0	0	0	9714.47	69452.4	0	0	0	0	0	0	0	0	2.62049	14.3795	0	0	0	0	0	0	0	0	3707.12	4829.96	0	0
1154	Trier	Germany	Western Europe	1.60176e+07	506875	5847125	Europe	66080.8	0	0	0	0	16573.9	49506.9	0	0	0	0	0	0	0	0	6.31787	9.68213	0	0	0	0	0	0	0	0	2623.33	5113.22	0	0	0	0
807	Nkongsamba	Cameroon	Middle Africa	1.49011e+07	993567	612833	Africa	100584	0	0	0	0	0	0	100584	0	0	0	0	0	0	0	0	0	15	0	0	0	0	0	0	0	0	0	6705.63	0	0	0
1252	Zalingei	Sudan	Northern Africa	1.09337e+07	2315136	1591318	Africa	72263.5	0	72263.5	0	0	0	0	0	0	0	0	0	11	0	0	0	0	0	0	0	0	0	6569.4	0	0	0	0	0	0	0	0
565	Kisumu	Kenya	Eastern Africa	2.68193e+07	3484685	-12574	Africa	79096	0	0	0	0	0	75512.8	3583.13	0	0	0	0	0	0	0	0	25.3178	1.68217	0	0	0	0	0	0	0	0	2982.6	2130.06	0	0	0
567	Kitakyushu	Japan	Eastern Asia	3.22179e+08	11682856	4097426	Asia	1.06418e+06	81521.6	645368	328144	9150.46	0	0	0	0	0	0	27.7581	192.786	96.9238	5.53237	0	0	0	0	0	0	2936.86	3347.59	3385.59	1653.99	0	0	0	0	0	0
1085	Taipei	Taiwan	Eastern Asia	5.00834e+08	11456568	3058544	Asia	3.72261e+06	0	0	0	0	0	46961.2	149766	1.14008e+06	2.11409e+06	271714	0	0	0	0	0	13.2162	61.5564	149.332	243.002	35.8935	0	0	0	0	0	3553.32	2432.99	7634.49	8699.92	7570.01
825	Omura	Japan	Eastern Asia	3.49036e+07	11684671	3983871	Asia	96427.1	0	0	0	0	0	1632.16	94794.9	0	0	0	0	0	0	0	0	2.88563	32.1144	0	0	0	0	0	0	0	0	565.618	2951.79	0	0	0
102	Auckland	New Zealand	Australia and New Zealand	5.1403e+08	15249735	-4439519	Oceania	613558	0	0	0	0	0	0	0	28610.9	268421	316526	0	0	0	0	0	0	0	30.2506	221.168	263.581	0	0	0	0	0	0	0	945.797	1213.65	1200.87
321	El Progreso	Honduras	Central America	1.29252e+07	-8603346	1895115	North America	63363.1	0	0	0	0	62722.4	640.703	0	0	0	0	0	0	0	0	12.6965	0.303451	0	0	0	0	0	0	0	0	4940.11	2111.39	0	0	0	0
694	Matagalpa	Nicaragua	Central America	6.9578e+06	-8475500	1593214	North America	54059.5	0	54059.5	0	0	0	0	0	0	0	0	0	7	0	0	0	0	0	0	0	0	0	7722.78	0	0	0	0	0	0	0	0
199	Cali	Colombia	South America	1.34103e+08	-7660367	424256	South America	1152297	0	313499	838798	0	0	0	0	0	0	0	0	35.9998	99.0002	0	0	0	0	0	0	0	0	8708.35	8472.69	0	0	0	0	0	0	0
255	Cologne	Germany	Western Europe	2.44337e+08	524750	5975303	Europe	865468	305893	537606	0	0	0	0	0	0	0	0	123.018	115.249	0	0	0	0	0	0	0	0	2486.58	4664.73	0	0	0	0	0	0	0	0
314	Dschang	Cameroon	Middle Africa	1.09277e+07	1005227	673591	Africa	61410.9	0	61410.9	0	0	0	0	0	0	0	0	0	11	0	0	0	0	0	0	0	0	0	5582.81	0	0	0	0	0	0	0	0
234	Chuncheon	South Korea	Eastern Asia	2.29618e+07	11053152	4550891	Asia	179241	0	0	0	168647	10593.8	0	0	0	0	0	0	0	0	18.5949	4.40513	0	0	0	0	0	0	0	0	9069.56	2404.88	0	0	0	0	0
775	Nagasaki	Japan	Eastern Asia	8.17716e+07	11688598	3967159	Asia	325226	0	0	0	0	0	220979	104247	0	0	0	0	0	0	0	0	59.8845	22.1155	0	0	0	0	0	0	0	0	3690.1	4713.73	0	0	0
232	Choluteca	Honduras	Central America	1.39161e+07	-8592500	1639000	North America	69640.1	0	0	0	0	3218.34	66421.8	0	0	0	0	0	0	0	0	1.46964	12.5304	0	0	0	0	0	0	0	0	2189.89	5300.86	0	0	0	0
532	Kebkabiya	Sudan	Northern Africa	9.94046e+06	2372400	1681400	Africa	111289	0	36251.2	75037.5	0	0	0	0	0	0	0	0	3.18472	6.81528	0	0	0	0	0	0	0	0	11382.9	11010.2	0	0	0	0	0	0	0
727	Mexicali	Mexico	Central America	1.04704e+08	-10403195	3949329	North America	202018	0	0	0	0	0	0	43870.6	142158	15990	0	0	0	0	0	0	0	24.3754	74.7895	5.83511	0	0	0	0	0	0	0	1799.79	1900.77	2740.3	0
1113	Tegucigalpa	Honduras	Central America	8.44979e+07	-8576041	1734453	North America	422220	414854	540.408	0	0	0	0	0	0	0	0	82.6576	0.203283	0	0	0	0	0	0	0	0	5018.94	2658.4	0	0	0	0	0	0	0	0
177	Bonn	Germany	Western Europe	2.35314e+08	534113	5954926	Europe	598373	0	52558.7	226720	306045	13050	0	0	0	0	0	0	15.3621	108.618	106.198	4.822	0	0	0	0	0	0	3421.32	2087.31	2881.84	2706.35	0	0	0	0	0
120	Bamenda	Cameroon	Middle Africa	3.47707e+07	1014443	736243	Africa	138540	0	0	0	0	73101.4	65439.1	0	0	0	0	0	0	0	0	17.9411	17.0589	0	0	0	0	0	0	0	0	4074.53	3836.06	0	0	0	0
527	Kas	Sudan	Northern Africa	7.95144e+06	2398375	1541750	Africa	54495.3	0	0	0	0	13113.4	41381.9	0	0	0	0	0	0	0	0	2.39458	5.60542	0	0	0	0	0	0	0	0	5476.3	7382.48	0	0	0	0
863	Pangkalan Brandan	Indonesia	South-Eastern Asia	1.09271e+07	9835591	496409	Asia	115518	46185.2	69332.8	0	0	0	0	0	0	0	0	3.70113	7.29887	0	0	0	0	0	0	0	0	12478.7	9499.11	0	0	0	0	0	0	0	0
457	Iizuka	Japan	Eastern Asia	2.79272e+07	11690786	4066893	Asia	69597.4	0	0	69597.4	0	0	0	0	0	0	0	0	0	28	0	0	0	0	0	0	0	0	0	2485.62	0	0	0	0	0	0	0
983	San Miguel	El Salvador	Central America	1.98806e+07	-8686550	1660900	North America	121968	0	0	0	0	0	0	0	0	42790.4	79177.7	0	0	0	0	0	0	0	0	7.21813	12.7819	0	0	0	0	0	0	0	0	5928.18	6194.54
680	Manisa	Turkey	Western Asia	1.59761e+07	2356500	4634375	Asia	84180.1	79656.4	0	0	0	0	0	0	0	0	0	13.3956	0	0	0	0	0	0	0	0	0	5946.46	0	0	0	0	0	0	0	0	0
1038	Sidiangkat	Indonesia	South-Eastern Asia	9.93336e+06	9846400	339700	Asia	92608.2	0	0	0	0	0	92608.2	0	0	0	0	0	0	0	0	0	10	0	0	0	0	0	0	0	0	0	9260.82	0	0	0	0
1148	Tosu	Japan	Eastern Asia	2.39363e+07	11698125	4037250	Asia	73337.8	0	0	66692	6645.84	0	0	0	0	0	0	0	0	20.3052	3.69481	0	0	0	0	0	0	0	0	3284.48	1798.7	0	0	0	0	0	0
708	Mbouda	Cameroon	Middle Africa	1.19212e+07	1024750	694917	Africa	68575.8	0	0	68575.8	0	0	0	0	0	0	0	0	0	12	0	0	0	0	0	0	0	0	0	5714.65	0	0	0	0	0	0	0
710	Medan	Indonesia	South-Eastern Asia	3.65556e+08	9876568	443889	Asia	1.68777e+06	0	0	0	0	146144	1.18898e+06	352656	0	0	0	0	0	0	0	51.5549	225.159	91.2864	0	0	0	0	0	0	0	2834.72	5280.61	3863.18	0	0	0
468	Isahaya	Japan	Eastern Asia	3.39058e+07	11699059	3974324	Asia	119043	0	0	0	0	0	0	12091.7	106952	0	0	0	0	0	0	0	0	3.31094	30.6891	0	0	0	0	0	0	0	0	3652.04	3485.01	0	0
109	Bafoussam	Cameroon	Middle Africa	3.47699e+07	1040671	677700	Africa	147811	0	147811	0	0	0	0	0	0	0	0	0	35	0	0	0	0	0	0	0	0	0	4223.17	0	0	0	0	0	0	0	0
778	Nairobi	Kenya	Eastern Africa	1.4701e+08	3691622	-158831	Africa	564452	0	0	0	192949	294508	76994.8	0	0	0	0	0	0	0	42.4809	82.6378	22.8813	0	0	0	0	0	0	0	4542.01	3563.84	3364.98	0	0	0	0
1056	Stabat	Indonesia	South-Eastern Asia	1.39071e+07	9854643	463357	Asia	127088	0	0	0	0	127088	0	0	0	0	0	0	0	0	0	14	0	0	0	0	0	0	0	0	0	9077.69	0	0	0	0	0
824	Olongapo	Philippines	South-Eastern Asia	2.18719e+07	11806136	1827045	Asia	156095	0	0	0	0	0	0	152614	3481.86	0	0	0	0	0	0	0	0	20.7662	1.23376	0	0	0	0	0	0	0	0	7349.12	2822.16	0	0
856	Palmira	Colombia	South America	1.98671e+07	-7637900	436800	South America	119855	0	0	119855	0	0	0	0	0	0	0	0	0	20	0	0	0	0	0	0	0	0	0	5992.73	0	0	0	0	0	0	0
627	Liège	Belgium	Western Europe	1.05137e+08	419462	5939586	Europe	316081	10621.9	0	0	0	0	0	0	0	0	0	4.27098	0	0	0	0	0	0	0	0	0	2487.01	0	0	0	0	0	0	0	0	0
504	Kabanjahe	Indonesia	South-Eastern Asia	9.93345e+06	9862500	383900	Asia	64901.2	0	0	0	0	0	0	0	0	64901.2	0	0	0	0	0	0	0	0	0	10	0	0	0	0	0	0	0	0	0	6490.12	0
599	Kurume	Japan	Eastern Asia	3.59038e+07	11704639	4028500	Asia	154000	0	0	0	154000	0	0	0	0	0	0	0	0	0	36	0	0	0	0	0	0	0	0	0	4277.77	0	0	0	0	0	0
1099	Tarlac City	Philippines	South-Eastern Asia	2.88333e+07	11813672	1904569	Asia	93615	0	0	0	0	92.3672	93522.6	0	0	0	0	0	0	0	0	0.373377	28.6266	0	0	0	0	0	0	0	0	247.383	3266.98	0	0	0	0
595	Kumbo	Cameroon	Middle Africa	7.94769e+06	1066750	767125	Africa	57671	0	0	0	0	0	0	0	49386.5	8284.46	0	0	0	0	0	0	0	0	6.55595	1.44405	0	0	0	0	0	0	0	0	7533.08	5736.96	0
58	Antananarivo	Madagascar	Eastern Africa	6.66449e+07	4604619	-2318037	Africa	290641	186443	104199	0	0	0	0	0	0	0	0	36.7341	30.2659	0	0	0	0	0	0	0	0	5075.48	3442.77	0	0	0	0	0	0	0	0
648	Lubuk Pakam	Indonesia	South-Eastern Asia	1.3907e+07	9897500	440000	Asia	53358.7	0	0	0	0	53358.7	0	0	0	0	0	0	0	0	0	14	0	0	0	0	0	0	0	0	0	3811.33	0	0	0	0	0
767	Muroran	Japan	Eastern Asia	5.39658e+07	11710296	5049426	Asia	128709	0	0	0	0	0	0	0	62469.6	66239.4	0	0	0	0	0	0	0	0	32.3437	21.6563	0	0	0	0	0	0	0	0	1931.43	3058.66	0
57	Angeles	Philippines	South-Eastern Asia	6.46239e+07	11826346	1864685	Asia	214015	0	0	0	0	0	0	70447.1	143568	0	0	0	0	0	0	0	0	16.5095	48.4905	0	0	0	0	0	0	0	0	4267.06	2960.74	0	0
932	Quevedo	Ecuador	South America	1.98662e+07	-7963400	-126700	South America	70308.5	0	0	0	70308.5	0	0	0	0	0	0	0	0	0	20	0	0	0	0	0	0	0	0	0	3515.43	0	0	0	0	0	0
1165	Tuluá	Colombia	South America	1.29139e+07	-7624962	505346	South America	103084	39183.4	0	0	0	0	0	0	0	0	0	5.44523	0	0	0	0	0	0	0	0	0	7195.91	0	0	0	0	0	0	0	0	0
342	Foumban	Cameroon	Middle Africa	1.68884e+07	1088500	707853	Africa	118701	0	0	118641	59.6173	0	0	0	0	0	0	0	0	16.9457	0.0542873	0	0	0	0	0	0	0	0	7001.26	1098.18	0	0	0	0	0	0
1035	Sibolga	Indonesia	South-Eastern Asia	1.19198e+07	9897833	214417	Asia	52930.3	52930.3	0	0	0	0	0	0	0	0	0	12	0	0	0	0	0	0	0	0	0	4410.86	0	0	0	0	0	0	0	0	0
1239	Yilan City	Taiwan	Eastern Asia	2.19041e+07	11495909	3023727	Asia	130443	0	0	0	0	0	0	0	129801	641.749	0	0	0	0	0	0	0	0	20.6742	1.32583	0	0	0	0	0	0	0	0	6278.44	484.036	0
389	Guatemala City	Guatemala	Central America	2.77368e+08	-8892668	1798002	North America	1.13083e+06	0	0	0	0	0	0	308018	519785	297247	5777.74	0	0	0	0	0	0	66.268	146.702	63.6869	2.34312	0	0	0	0	0	0	4648.07	3543.13	4667.32	2465.83
654	Luodong	Taiwan	Eastern Asia	1.99126e+07	11501750	3014700	Asia	113234	0	0	0	0	0	0	0	113234	0	0	0	0	0	0	0	0	0.00192163	19.9981	0	0	0	0	0	0	0	0	0	5662.24	0	0
203	Cartago	Colombia	South America	9.93397e+06	-7592100	586500	South America	75443.2	0	0	0	72688.4	2754.75	0	0	0	0	0	0	0	0	9.0458	0.954199	0	0	0	0	0	0	0	0	8035.6	2886.97	0	0	0	0	0
439	Hualien	Taiwan	Eastern Asia	2.98651e+07	11524967	2930467	Asia	115035	581.568	0	0	0	0	0	0	0	0	0	0.208155	0	0	0	0	0	0	0	0	0	2793.92	0	0	0	0	0	0	0	0	0
1143	Tomakomai	Japan	Eastern Asia	4.89724e+07	11724827	5082214	Asia	102409	0	0	0	0	0	0	0	38098.8	64310.2	0	0	0	0	0	0	0	0	23.8278	25.1722	0	0	0	0	0	0	0	0	1598.92	2554.81	0
890	Pereira	Colombia	South America	4.17228e+07	-7570262	595238	South America	231281	0	0	0	0	0	34452.1	196829	0	0	0	0	0	0	0	0	9.27898	32.721	0	0	0	0	0	0	0	0	3712.92	6015.36	0	0	0
5	Abha	Saudi Arabia	Western Asia	2.58598e+07	4127615	2238077	Asia	107385	107385	0	0	0	0	0	0	0	0	0	26	0	0	0	0	0	0	0	0	0	4130.19	0	0	0	0	0	0	0	0	0
145	Bayt al Faqih	Yemen	Western Asia	5.96485e+06	4256000	1787500	Asia	57260.2	0	57260.2	0	0	0	0	0	0	0	0	0	6	0	0	0	0	0	0	0	0	0	9543.37	0	0	0	0	0	0	0	0
826	Omuta	Japan	Eastern Asia	6.98086e+07	11721657	3994871	Asia	161693	0	0	0	0	0	0	114314	47379.6	0	0	0	0	0	0	0	0	44.6025	25.3975	0	0	0	0	0	0	0	0	2562.94	1865.52	0	0
679	Manila	Philippines	South-Eastern Asia	1.1383e+09	11882406	1797699	Asia	8456581	0	52782	1208512	3.46325e+06	2465972	863520	226174	119788	56580.9	0	0	16	186.992	252.854	303.446	240.312	72.6861	42.6777	30.0328	0	0	3298.88	6462.91	13696.7	8126.57	3593.33	3111.65	2806.81	1883.97	0
947	Riobamba	Ecuador	South America	2.1853e+07	-7880455	-206091	South America	85888.7	0	0	0	0	0	0	0	0	85888.7	0	0	0	0	0	0	0	0	0	22	0	0	0	0	0	0	0	0	0	3904.03	0
1005	Santiago	Chile	South America	5.05664e+08	-6327279	-4048530	South America	2826460	7784	967344	1.58775e+06	263582	0	0	0	0	0	0	2.43272	166.372	264.188	74.0077	0	0	0	0	0	0	3199.71	5814.34	6009.94	3561.55	0	0	0	0	0	0
576	Koblenz	Germany	Western Europe	3.50434e+07	574300	5911186	Europe	103721	0	0	0	5006.48	98714.6	0	0	0	0	0	0	0	0	1.73431	33.2657	0	0	0	0	0	0	0	0	2886.73	2967.46	0	0	0	0	0
887	Pematang Siantar	Indonesia	South-Eastern Asia	3.87403e+07	9921987	366346	Asia	365871	0	0	0	0	25195.2	340676	0	0	0	0	0	0	0	0	7.06143	31.9386	0	0	0	0	0	0	0	0	3568.01	10666.6	0	0	0	0
477	Izumo	Japan	Eastern Asia	3.29266e+07	11722894	4265015	Asia	102675	0	0	0	0	0	0	2816.83	99858	0	0	0	0	0	0	0	0	2.18947	30.8105	0	0	0	0	0	0	0	0	1286.53	3241.04	0	0
51	Ambato	Ecuador	South America	3.07927e+07	-7878984	-155048	South America	82765.9	0	0	0	0	0	0	60482.6	22283.4	0	0	0	0	0	0	0	0	20.6464	10.3536	0	0	0	0	0	0	0	0	2929.45	2152.24	0	0
1109	Tebing Tinggi	Indonesia	South-Eastern Asia	2.58271e+07	9927962	412731	Asia	130827	0	0	130827	0	0	0	0	0	0	0	0	0	26	0	0	0	0	0	0	0	0	0	5031.82	0	0	0	0	0	0	0
430	Hofu	Japan	Eastern Asia	3.8902e+07	11735321	4113115	Asia	110435	0	0	0	0	25119.3	85316.1	0	0	0	0	0	0	0	0	13.37	25.63	0	0	0	0	0	0	0	0	1878.78	3328.76	0	0	0	0
18	Agadez	Niger	Western Africa	9.9444e+06	778700	2086700	Africa	66745.3	66745.3	0	0	0	0	0	0	0	0	0	10	0	0	0	0	0	0	0	0	0	6674.53	0	0	0	0	0	0	0	0	0
844	Padang Sidempuan	Indonesia	South-Eastern Asia	1.68863e+07	9947971	170971	Asia	107387	0	104436	2951.11	0	0	0	0	0	0	0	0	15.6661	1.33393	0	0	0	0	0	0	0	0	6666.36	2212.34	0	0	0	0	0	0	0
698	Matsue	Japan	Eastern Asia	2.69405e+07	11742093	4275981	Asia	51504.7	0	0	0	0	51504.7	0	0	0	0	0	0	0	0	0	27	0	0	0	0	0	0	0	0	0	1907.58	0	0	0	0	0
935	Quito	Ecuador	South America	1.81775e+08	-7866374	-20516	South America	635489	0	0	0	0	0	0	0	0	615100	20388.7	0	0	0	0	0	0	0	0	175.641	7.3588	0	0	0	0	0	0	0	0	3502.03	2770.66
77	Armenia	Colombia	South America	2.38413e+07	-7570625	560250	South America	159844	0	0	0	0	0	0	159705	138.773	0	0	0	0	0	0	0	0	23.7112	0.288794	0	0	0	0	0	0	0	0	6735.44	480.525	0	0
7	Abu `Arish	Saudi Arabia	Western Asia	7.95552e+06	4176375	2086375	Asia	61879.7	0	0	0	0	0	0	0	0	970.461	60909.3	0	0	0	0	0	0	0	0	0.790982	7.20902	0	0	0	0	0	0	0	0	1226.91	8449.04
561	Kisaran	Indonesia	South-Eastern Asia	1.68868e+07	9977382	367971	Asia	162116	162116	0	0	0	0	0	0	0	0	0	17	0	0	0	0	0	0	0	0	0	9536.25	0	0	0	0	0	0	0	0	0
404	Hakodate	Japan	Eastern Asia	7.89399e+07	11750741	4988943	Asia	339970	0	0	0	0	0	0	172923	167047	0	0	0	0	0	0	0	0	42.8291	36.1709	0	0	0	0	0	0	0	0	4037.52	4618.27	0	0
1093	Talca	Chile	South America	2.69403e+07	-6324500	-4272500	South America	116338	0	116331	6.78524	0	0	0	0	0	0	0	0	26.9736	0.0264376	0	0	0	0	0	0	0	0	4312.79	256.651	0	0	0	0	0	0	0
867	Panyabungan	Indonesia	South-Eastern Asia	6.95316e+06	9977643	106071	Asia	90516.4	0	0	0	0	0	0	0	6607.39	83909	0	0	0	0	0	0	0	0	1.1445	5.8555	0	0	0	0	0	0	0	0	5773.14	14330	0
1034	Shunan	Japan	Eastern Asia	6.78291e+07	11757338	4113059	Asia	207989	0	0	0	35790.8	168800	3397.49	0	0	0	0	0	0	0	14.2674	52.7647	0.967949	0	0	0	0	0	0	0	2508.58	3199.12	3509.98	0	0	0	0
267	Curicó	Chile	South America	1.19723e+07	-6309500	-4221500	South America	50850.9	0	0	0	50850.9	0	0	0	0	0	0	0	0	0	12	0	0	0	0	0	0	0	0	0	4237.57	0	0	0	0	0	0
104	Aydin	Turkey	Western Asia	1.39766e+07	2409357	4546929	Asia	78787.4	1050.82	0	0	0	0	0	0	0	0	0	0.962661	0	0	0	0	0	0	0	0	0	1091.58	0	0	0	0	0	0	0	0	0
593	Kumamoto	Japan	Eastern Asia	1.29639e+08	11764708	3971123	Asia	433608	0	0	0	0	0	0	364637	68971.6	0	0	0	0	0	0	0	0	105.901	24.0991	0	0	0	0	0	0	0	0	3443.19	2862	0	0
450	Ibarra	Ecuador	South America	1.58929e+07	-7829438	42375	South America	58804.2	0	0	0	0	0	0	0	0	51200.8	7603.43	0	0	0	0	0	0	0	0	13.0106	2.98938	0	0	0	0	0	0	0	0	3935.31	2543.48
1243	Yonago	Japan	Eastern Asia	4.98897e+07	11768160	4274400	Asia	154564	0	0	153617	946.859	0	0	0	0	0	0	0	0.00669297	48.6968	1.29653	0	0	0	0	0	0	0	0	3154.56	730.301	0	0	0	0	0	0
223	Chillán	Chile	South America	2.09591e+07	-6305833	-4407262	South America	118278	0	0	90873.3	27405.2	0	0	0	0	0	0	0	0	17.0368	3.96319	0	0	0	0	0	0	0	0	5333.94	6914.92	0	0	0	0	0	0
568	Kitami	Japan	Eastern Asia	2.59924e+07	11770885	5210308	Asia	106944	0	0	0	0	1952.83	104992	0	0	0	0	0	0	0	0	0.523597	25.4764	0	0	0	0	0	0	0	0	3729.64	4121.13	0	0	0	0
1124	Tepic	Mexico	Central America	3.1843e+07	-10053656	2634438	North America	69215.8	0	0	0	0	0	0	0	7170.3	62045.5	0	0	0	0	0	0	0	0	2.81191	29.1881	0	0	0	0	0	0	0	0	2549.98	2125.71	0
681	Manizales	Colombia	South America	3.07957e+07	-7548855	625468	South America	239445	0	0	0	0	0	0	0	224835	14610.1	0	0	0	0	0	0	0	0	27.1166	3.8834	0	0	0	0	0	0	0	0	8291.4	3762.2	0
938	Rancagua	Chile	South America	2.29428e+07	-6303196	-4127717	South America	88057.2	0	0	0	88057.2	0	0	0	0	0	0	0	0	0	23	0	0	0	0	0	0	0	0	0	3828.57	0	0	0	0	0	0
425	Hiroshima	Japan	Eastern Asia	2.87299e+08	11782490	4154809	Asia	1.23306e+06	2114.38	714347	491093	25501	0	0	0	0	0	0	3.96227	138.26	136.967	8.80998	0	0	0	0	0	0	533.628	5166.68	3585.47	2894.56	0	0	0	0	0	0
795	Neiva	Colombia	South America	2.28468e+07	-7538413	362500	South America	119842	0	119842	0	0	0	0	0	0	0	0	0	23	0	0	0	0	0	0	0	0	0	5210.54	0	0	0	0	0	0	0	0
1213	Wiesbaden	Germany	Western Europe	9.81139e+07	627112	5876378	Europe	327066	121804	0	0	0	0	0	0	0	0	0	32.4011	0	0	0	0	0	0	0	0	0	3759.27	0	0	0	0	0	0	0	0	0
1236	Yatsushiro	Japan	Eastern Asia	2.59261e+07	11778000	3935577	Asia	82359.8	0	0	0	0	0	52771.6	29588.2	0	0	0	0	0	0	0	0	16.3322	9.66784	0	0	0	0	0	0	0	0	3231.15	3060.47	0	0	0
244	Ciudad Guzmán	Mexico	Central America	1.59171e+07	-9990438	2417375	North America	65146.9	0	0	0	0	0	0	0	65146.9	0	0	0	0	0	0	0	0	0	16	0	0	0	0	0	0	0	0	0	4071.68	0	0
968	Salihli	Turkey	Western Asia	8.98628e+06	2422944	4619167	Asia	50473.8	0	0	0	0	0	0	50473.8	0	0	0	0	0	0	0	0	0	9	0	0	0	0	0	0	0	0	0	5608.21	0	0	0
475	Iwakuni	Japan	Eastern Asia	6.08484e+07	11782320	4127877	Asia	151397	0	0	151397	0	0	0	0	0	0	0	0	0	61	0	0	0	0	0	0	0	0	0	2481.92	0	0	0	0	0	0	0
1119	Temuco	Chile	South America	2.39648e+07	-6236042	-4647875	South America	86579.4	0	61.9688	86517.4	0	0	0	0	0	0	0	0	0.0944859	23.9055	0	0	0	0	0	0	0	0	655.852	3619.14	0	0	0	0	0	0	0
843	Padang	Indonesia	South-Eastern Asia	1.08271e+08	10058876	-113427	Asia	366959	0	0	0	0	0	61451.1	272046	33462	0	0	0	0	0	0	0	15.5081	82.6252	10.8667	0	0	0	0	0	0	0	3962.51	3292.53	3079.31	0	0
156	Beppu	Japan	Eastern Asia	3.39091e+07	11791559	4027941	Asia	106840	0	0	0	0	0	0	0	0	54245.6	52594	0	0	0	0	0	0	0	0	18.1417	15.8583	0	0	0	0	0	0	0	0	2990.11	3316.49
449	Ibagué	Colombia	South America	3.17883e+07	-7523406	548938	South America	216768	0	0	0	0	0	0	0	89646.2	127122	0	0	0	0	0	0	0	0	19.1452	12.8548	0	0	0	0	0	0	0	0	4682.44	9889.04	0
183	Bukittinggi	Indonesia	South-Eastern Asia	2.88059e+07	10060914	-38534	Asia	207980	0	0	0	0	0	0	0	0	130308	77672	0	0	0	0	0	0	0	0	18.2921	10.7079	0	0	0	0	0	0	0	0	7123.75	7253.73
769	Musan	China	Eastern Asia	5.99604e+06	10743333	5036667	Asia	77124.5	77124.5	0	0	0	0	0	0	0	0	0	5.99936	0	0	0	0	0	0	0	0	0	12855.5	0	0	0	0	0	0	0	0	0
488	Jeju-si	South Korea	Eastern Asia	2.89238e+07	11329741	4051603	Asia	123626	0	0	0	0	0	0	0	344.398	123282	0	0	0	0	0	0	0	0	0.456507	28.5435	0	0	0	0	0	0	0	0	754.421	4319.08	0
597	Kure	Japan	Eastern Asia	2.19456e+07	11806273	4135909	Asia	107161	96251.7	0	0	0	0	0	0	0	0	0	20.6138	0	0	0	0	0	0	0	0	0	4669.28	0	0	0	0	0	0	0	0	0
834	Osorno	Chile	South America	1.59833e+07	-6178438	-4854000	South America	63152.3	0	25730.4	37421.9	0	0	0	0	0	0	0	0	7.54626	8.45374	0	0	0	0	0	0	0	0	3409.69	4426.67	0	0	0	0	0	0	0
789	Nazilli	Turkey	Western Asia	7.98677e+06	2450875	4555000	Asia	59447.7	0	0	59447.7	0	0	0	0	0	0	0	0	0	8	0	0	0	0	0	0	0	0	0	7430.97	0	0	0	0	0	0	0
822	Oita	Japan	Eastern Asia	7.67932e+07	11809695	4021201	Asia	140219	0	0	0	0	0	0	33.9375	119782	20403.1	0	0	0	0	0	0	0	0.837978	65.8268	10.3352	0	0	0	0	0	0	0	40.4993	1819.65	1974.14	0
916	Puerto Montt	Chile	South America	1.49875e+07	-6109767	-4952900	South America	61846	0	0	0	0	0	0	50426.2	11419.8	0	0	0	0	0	0	0	0	11.5166	3.48337	0	0	0	0	0	0	0	0	4378.55	3278.38	0	0
143	Batusangkar	Indonesia	South-Eastern Asia	9.93306e+06	10080500	-56300	Asia	57169.6	0	0	0	0	0	0	0	0	57169.6	0	0	0	0	0	0	0	0	0	10	0	0	0	0	0	0	0	0	0	5716.96	0
447	Hyesan	North Korea	Eastern Asia	1.19898e+07	10744250	4945750	Asia	130859	0	0	0	130859	0	0	0	0	0	0	0	0	0	12	0	0	0	0	0	0	0	0	0	10904.9	0	0	0	0	0	0
819	Obihiro	Japan	Eastern Asia	4.39781e+07	11821705	5113795	Asia	119534	0	0	0	946.055	118588	0	0	0	0	0	0	0	0	0.780446	43.2196	0	0	0	0	0	0	0	0	1212.2	2743.86	0	0	0	0	0
317	Durango	Mexico	Central America	5.47532e+07	-9917864	2936936	North America	181197	0	0	0	0	0	0	1175.31	180022	0	0	0	0	0	0	0	0	0.855143	54.1449	0	0	0	0	0	0	0	0	1374.4	3324.82	0	0
416	Heerlen	Germany	Western Europe	7.20982e+07	450500	5967458	Europe	202086	73061.6	0	0	0	0	0	0	0	0	0	29.6376	0	0	0	0	0	0	0	0	0	2465.17	0	0	0	0	0	0	0	0	0
507	Kagoshima	Japan	Eastern Asia	1.07672e+08	11846944	3826537	Asia	365529	0	0	0	0	0	0	0	0	324057	41471.5	0	0	0	0	0	0	0	0	91.1773	16.8227	0	0	0	0	0	0	0	0	3554.15	2465.22
160	Binangonan	Philippines	South-Eastern Asia	1.39179e+07	11905929	1783500	Asia	66313.7	0	0	0	0	0	55059.8	11253.9	0	0	0	0	0	0	0	0	11.4502	2.54977	0	0	0	0	0	0	0	0	4808.62	4413.69	0	0	0
269	Cusco	Peru	South America	3.97614e+07	-7086750	-1667200	South America	149633	134882	14750.2	0	0	0	0	0	0	0	0	28.8863	11.1137	0	0	0	0	0	0	0	0	4669.43	1327.21	0	0	0	0	0	0	0	0
22	Aira	Japan	Eastern Asia	2.49248e+07	11842940	3845140	Asia	68943.4	0	0	0	0	0	0	0	0	0	68943.4	0	0	0	0	0	0	0	0	0	25	0	0	0	0	0	0	0	0	0	2757.74
139	Batangas City	Philippines	South-Eastern Asia	2.58455e+07	11916808	1695462	Asia	71172.9	0	0	0	0	0	0	13310.9	57862	0	0	0	0	0	0	0	0	4.59648	21.4035	0	0	0	0	0	0	0	0	2895.88	2703.39	0	0
73	Arequipa	Peru	South America	5.46902e+07	-6986209	-2018064	South America	265155	0	0	0	0	0	0	0	41184.9	223970	0	0	0	0	0	0	0	0	7.71863	47.2814	0	0	0	0	0	0	0	0	5335.78	4736.96	0
126	Bangkinang	Indonesia	South-Eastern Asia	6.95314e+06	10124500	41786	Asia	67305.3	23070.3	0	0	0	0	0	0	0	0	0	3.3661	0	0	0	0	0	0	0	0	0	6853.72	0	0	0	0	0	0	0	0	0
353	Fukuyama	Japan	Eastern Asia	7.78113e+07	11860513	4163397	Asia	135019	23198.9	0	0	0	0	0	0	0	0	0	16.5922	0	0	0	0	0	0	0	0	0	1398.18	0	0	0	0	0	0	0	0	0
373	Girardot	Colombia	South America	1.68875e+07	-7483618	531735	South America	72513.3	0	0	6618.05	65895.2	0	0	0	0	0	0	0	0	2.73885	14.2612	0	0	0	0	0	0	0	0	2416.36	4620.61	0	0	0	0	0	0
828	Onomichi	Japan	Eastern Asia	5.0876e+07	11849382	4156618	Asia	97090	97090	0	0	0	0	0	0	0	0	0	51	0	0	0	0	0	0	0	0	0	1903.73	0	0	0	0	0	0	0	0	0
892	Perpignan	France	Western Europe	1.9989e+07	239600	5089000	Europe	67365.6	0	0	0	67365.6	0	0	0	0	0	0	0	0	0.00114333	19.9989	0	0	0	0	0	0	0	0	0	3368.47	0	0	0	0	0	0
559	Kirishima	Japan	Eastern Asia	3.68889e+07	11852959	3846635	Asia	101806	0	0	0	0	0	0	0	0	101806	0	0	0	0	0	0	0	0	0	37	0	0	0	0	0	0	0	0	0	2751.51	0
248	Clermont-Ferrand	France	Western Europe	5.10088e+07	248127	5424657	Europe	183500	0	0	0	0	0	0	0	0	65104.3	118395	0	0	0	0	0	0	0	0	23.8019	27.1981	0	0	0	0	0	0	0	0	2735.26	4353.07
292	Denizli	Turkey	Western Asia	2.99495e+07	2519533	4539600	Asia	153940	11917.1	0	0	0	0	0	0	0	0	0	3.84478	0	0	0	0	0	0	0	0	0	3099.55	0	0	0	0	0	0	0	0	0
63	Aomori	Japan	Eastern Asia	4.99507e+07	11862400	4881080	Asia	152058	0	0	0	0	0	0	0	106052	46005.9	0	0	0	0	0	0	0	0	36.2866	13.7134	0	0	0	0	0	0	0	0	2922.64	3354.8	0
1184	Usak	Turkey	Western Asia	1.09837e+07	2527136	4640591	Asia	61601.7	0	38.2109	61563.5	0	0	0	0	0	0	0	0	0.0235202	10.9765	0	0	0	0	0	0	0	0	1624.6	5608.68	0	0	0	0	0	0	0
758	Muara Bungo	Indonesia	South-Eastern Asia	8.93983e+06	10231722	-184389	Asia	69105.5	69105.5	0	0	0	0	0	0	0	0	0	9	0	0	0	0	0	0	0	0	0	7678.38	0	0	0	0	0	0	0	0	0
424	Hirosaki	Japan	Eastern Asia	2.39751e+07	11864125	4856625	Asia	73977.9	0	0	0	0	0	0	0	0	73977.9	0	0	0	0	0	0	0	0	0	24	0	0	0	0	0	0	0	0	0	3082.41	0
626	Lido di Ostia	Italy	Southern Europe	1.09915e+07	1025591	4982136	Europe	69130.5	0	0	0	0	0	133.32	68997.2	0	0	0	0	0	0	0	0	1.01383	9.98617	0	0	0	0	0	0	0	0	131.501	6909.28	0	0	0
808	Nobeoka	Japan	Eastern Asia	3.49011e+07	11868329	3944300	Asia	108941	0	0	0	108941	0	0	0	0	0	0	0	0	0	35	0	0	0	0	0	0	0	0	0	3112.59	0	0	0	0	0	0
1183	Uruapan	Mexico	Central America	3.18328e+07	-9863906	2382562	North America	84135.8	0	0	0	430.922	83704.9	0	0	0	0	0	0	0	0	0.104536	31.8955	0	0	0	0	0	0	0	0	4122.23	2624.35	0	0	0	0	0
12	Acilia	Italy	Southern Europe	3.19755e+07	1032594	4986188	Europe	101935	0	0	0	0	0	0	59712.1	42222.7	0	0	0	0	0	0	0	0	17.4999	14.5001	0	0	0	0	0	0	0	0	3412.14	2911.88	0	0
950	Rome	Italy	Southern Europe	3.57735e+08	1044559	4998911	Europe	1.95086e+06	0	0	0	0	0	0	199031	1.27285e+06	472907	6074.19	0	0	0	0	0	0	44.0158	199.519	112.29	2.17573	0	0	0	0	0	0	4521.8	6379.59	4211.49	2791.8
748	Miyakonojo	Japan	Eastern Asia	3.58918e+07	11882722	3846111	Asia	117959	0	0	0	0	0	0	62216.6	55742.2	0	0	0	0	0	0	0	0	17.5068	18.4932	0	0	0	0	0	0	0	0	3553.85	3014.2	0	0
1126	Terni	Italy	Southern Europe	3.0982e+07	1047113	5074177	Europe	87731.9	38714.4	49017.5	0	0	0	0	0	0	0	0	15.8287	15.1713	0	0	0	0	0	0	0	0	2445.83	3230.94	0	0	0	0	0	0	0	0
989	Sana'a	Yemen	Western Asia	7.65562e+07	4332643	1887682	Asia	153998	0	0	0	0	0	0	94096.8	59901.4	0	0	0	0	0	0	0	0	49.4304	27.5696	0	0	0	0	0	0	0	0	1903.62	2172.74	0	0
749	Miyazaki	Japan	Eastern Asia	3.98813e+07	11899450	3867000	Asia	86937.1	0	0	0	0	81342.2	5594.88	0	0	0	0	0	0	0	0	36.5577	3.44227	0	0	0	0	0	0	0	0	2225.03	1625.35	0	0	0	0
268	Curup	Indonesia	South-Eastern Asia	1.58937e+07	10264125	-429188	Asia	118312	0	0	0	0	0	0	0	0	111134	7178.08	0	0	0	0	0	0	0	0	13.3535	2.64647	0	0	0	0	0	0	0	0	8322.43	2712.32
600	Kushiro	Japan	Eastern Asia	6.39692e+07	11911922	5121031	Asia	170019	0	0	0	0	140035	29983.8	0	0	0	0	0	0	0	0	49.5806	14.4194	0	0	0	0	0	0	0	0	2824.39	2079.41	0	0	0	0
651	Lucena	Philippines	South-Eastern Asia	1.49112e+07	11965767	1717233	Asia	67205.4	0	0	0	0	0	0	0	49616.8	17588.6	0	0	0	0	0	0	0	0	10.1742	4.82584	0	0	0	0	0	0	0	0	4876.74	3644.67	0
70	Arba Minch	Ethiopia	Eastern Africa	1.0928e+07	3750773	743864	Africa	56332.6	56332.6	0	0	0	0	0	0	0	0	0	11	0	0	0	0	0	0	0	0	0	5121.14	0	0	0	0	0	0	0	0	0
25	Akita	Japan	Eastern Asia	7.99008e+07	11927475	4758638	Asia	183716	0	0	0	0	0	125437	58278.8	0	0	0	0	0	0	0	0	43.626	36.374	0	0	0	0	0	0	0	0	2875.27	1602.21	0	0	0
682	Manna	Indonesia	South-Eastern Asia	1.19206e+07	10294833	-550833	Asia	64871.3	0	0	0	0	11770.8	53100.5	0	0	0	0	0	0	0	0	3.27841	8.72159	0	0	0	0	0	0	0	0	3590.41	6088.39	0	0	0	0
650	Lubuklinggau	Indonesia	South-Eastern Asia	1.39069e+07	10298571	-407143	Asia	88030.1	0	0	0	0	0	0	88030.1	0	0	0	0	0	0	0	0	0	14	0	0	0	0	0	0	0	0	0	6287.87	0	0	0
512	Kanazawa	Japan	Eastern Asia	1.3274e+08	11951252	4402380	Asia	404120	0	0	0	0	79244.1	324876	0	0	0	0	0	0	0	0	40.1946	92.8054	0	0	0	0	0	0	0	0	1971.51	3500.61	0	0	0	0
753	Morelia	Mexico	Central America	6.16787e+07	-9771177	2417323	North America	157508	0	0	0	83350.6	74157	0	0	0	0	0	0	0	0	34.2721	27.7279	0	0	0	0	0	0	0	0	2432.03	2674.45	0	0	0	0	0
451	Ibb	Yemen	Western Asia	9.94081e+06	4345600	1720700	Asia	73204.8	0	73204.8	0	0	0	0	0	0	0	0	0	10	0	0	0	0	0	0	0	0	0	7320.48	0	0	0	0	0	0	0	0
609	Lahat	Indonesia	South-Eastern Asia	1.49005e+07	10363833	-467900	Asia	128660	0	0	0	0	128660	0	0	0	0	0	0	0	0	0	15	0	0	0	0	0	0	0	0	0	8577.36	0	0	0	0	0
396	Hachinohe	Japan	Eastern Asia	5.09462e+07	11960108	4847814	Asia	102789	0	0	0	0	97487.2	5301.38	0	0	0	0	0	0	0	0	47.6404	3.35956	0	0	0	0	0	0	0	0	2046.31	1578	0	0	0	0
459	Iloilo City	Philippines	South-Eastern Asia	5.66446e+07	12150342	1321026	Asia	260221	0	0	176348	83872.7	0	0	0	0	0	0	0	0	38.1455	18.8545	0	0	0	0	0	0	0	0	4623.05	4448.41	0	0	0	0	0	0
350	Fukui	Japan	Eastern Asia	4.39091e+07	11962795	4346727	Asia	114237	0	0	0	0	59256.6	54980.1	0	0	0	0	0	0	0	0	21.9673	22.0327	0	0	0	0	0	0	0	0	2697.49	2495.39	0	0	0	0
787	Naples	Italy	Southern Europe	5.15494e+08	1207860	4884413	Europe	2.58808e+06	0	0	0	0	0	0	0	56073.2	1.38058e+06	1.15143e+06	0	0	0	0	0	0	0	17.899	282.441	215.66	0	0	0	0	0	0	0	3132.75	4888.05	5339.08
205	Caserta	Italy	Southern Europe	6.09433e+07	1203057	4908238	Europe	188113	0	0	0	0	0	0	48962.7	139151	0	0	0	0	0	0	0	0	17.5695	43.4305	0	0	0	0	0	0	0	0	2786.81	3203.98	0	0
1087	Takaoka	Japan	Eastern Asia	6.08833e+07	11970598	4424762	Asia	96153.3	0	0	0	0	72465.3	23687.9	0	0	0	0	0	0	0	0	43.4916	17.5084	0	0	0	0	0	0	0	0	1666.19	1352.95	0	0	0	0
464	Irapuato	Mexico	Central America	3.28339e+07	-9748621	2534924	North America	116548	66713.9	0	0	0	0	0	0	0	0	0	15.5458	0	0	0	0	0	0	0	0	0	4291.43	0	0	0	0	0	0	0	0	0
72	Areka	Ethiopia	Eastern Africa	3.97403e+06	3761500	873000	Africa	71387	0	0	0	0	0	71387	0	0	0	0	0	0	0	0	0	4	0	0	0	0	0	0	0	0	0	17846.8	0	0	0	0
759	Muara Enim	Indonesia	South-Eastern Asia	7.94688e+06	10387500	-451750	Asia	65857.6	0	65857.6	0	0	0	0	0	0	0	0	0	8	0	0	0	0	0	0	0	0	0	8232.2	0	0	0	0	0	0	0	0
319	Echizen	Japan	Eastern Asia	2.69432e+07	11973759	4328130	Asia	82022.5	0	0	0	48223.8	33798.7	0	0	0	0	0	0	0	0	14.1902	12.8098	0	0	0	0	0	0	0	0	3398.4	2638.49	0	0	0	0	0
531	Keban Agung	Indonesia	South-Eastern Asia	1.0927e+07	10389227	-464318	Asia	88081.8	0	4.98438	88076.8	0	0	0	0	0	0	0	0	0.214814	10.7852	0	0	0	0	0	0	0	0	23.2032	8166.47	0	0	0	0	0	0	0
1152	Toyama	Japan	Eastern Asia	4.79075e+07	11991042	4417938	Asia	89102.9	0	0	0	0	0	0	89102.9	0	0	0	0	0	0	0	0	0	48	0	0	0	0	0	0	0	0	0	1856.31	0	0	0
364	Gela	Italy	Southern Europe	1.99631e+07	1241450	4458750	Europe	70511.1	13360.8	0	0	0	0	0	0	0	0	0	4.78562	0	0	0	0	0	0	0	0	0	2791.86	0	0	0	0	0	0	0	0	0
296	Dhamar	Yemen	Western Asia	1.78946e+07	4361333	1791389	Asia	71332.5	0	0	0	0	0	0	18013.4	53319.1	0	0	0	0	0	0	0	0	5.63582	12.3642	0	0	0	0	0	0	0	0	3196.24	4312.38	0	0
108	Bacolod	Philippines	South-Eastern Asia	7.55258e+07	12191092	1314921	Asia	237063	0	0	0	0	0	0	226771	10291.8	0	0	0	0	0	0	0	0.00223995	73.0352	2.96258	0	0	0	0	0	0	0	0	3104.95	3473.93	0	0
967	Salerno	Italy	Southern Europe	2.79714e+07	1246643	4864679	Europe	119699	0	0	0	0	0	0	118646	1053.13	0	0	0	0	0	0	0	0	27.2732	0.726811	0	0	0	0	0	0	0	0	4350.26	1448.97	0	0
142	Baturaja	Indonesia	South-Eastern Asia	1.19205e+07	10423833	-509250	Asia	108396	0	108396	0	0	0	0	0	0	0	0	0	12	0	0	0	0	0	0	0	0	0	9033.01	0	0	0	0	0	0	0	0
964	Salamanca	Mexico	Central America	2.08939e+07	-9737500	2522595	North America	65467.6	58313.7	0	0	0	0	0	0	0	0	0	15.9488	0	0	0	0	0	0	0	0	0	3656.31	0	0	0	0	0	0	0	0	0
141	Battipaglia	Italy	Southern Europe	1.29865e+07	1264577	4857500	Europe	50526.1	0	0	0	0	41061.2	9464.9	0	0	0	0	0	0	0	0	11.1734	1.82661	0	0	0	0	0	0	0	0	3674.91	5181.67	0	0	0	0
1235	Yarim	Yemen	Western Asia	6.95882e+06	4362071	1760786	Asia	70302.6	0	0	0	0	0	70302.6	0	0	0	0	0	0	0	0	0	7	0	0	0	0	0	0	0	0	0	10043.2	0	0	0	0
1158	Tsuruoka	Japan	Eastern Asia	2.09692e+07	12011310	4646976	Asia	110818	0	0	0	0	0	0	110470	348.553	0	0	0	0	0	0	0	0	20.4493	0.550685	0	0	0	0	0	0	0	0	5402.12	632.944	0	0
207	Catania	Italy	Southern Europe	9.88277e+07	1308217	4511742	Europe	432246	0	0	0	0	0	0	7164.28	417049	8032.32	0	0	0	0	0	0	0	3.57933	92.7823	2.63836	0	0	0	0	0	0	0	2001.57	4494.92	3044.44	0
754	Morioka	Japan	Eastern Asia	5.89267e+07	12017263	4757720	Asia	181589	0	0	0	0	0	0	0	84093.8	97494.8	0	0	0	0	0	0	0	0	22.6674	36.3326	0	0	0	0	0	0	0	0	3709.9	2683.39	0
13	Acireale	Italy	Southern Europe	1.39759e+07	1314214	4519714	Europe	52331.9	0	0	0	0	0	0	0	47180.5	5151.4	0	0	0	0	0	0	0	0	11.8858	2.11417	0	0	0	0	0	0	0	0	3969.48	2436.61	0
1074	Syracuse	Italy	Southern Europe	2.4954e+07	1330900	4461180	Europe	93575.8	0	4304.52	89271.3	0	0	0	0	0	0	0	0	2.62788	22.3721	0	0	0	0	0	0	0	0	1638.02	3990.29	0	0	0	0	0	0	0
805	Niigata	Japan	Eastern Asia	1.03828e+08	12028827	4554904	Asia	261126	0	0	88820.9	172305	0	0	0	0	0	0	0	0	41.8048	62.1952	0	0	0	0	0	0	0	0	2124.66	2770.39	0	0	0	0	0	0
966	Salem	United States of America	Northern America	4.5999e+07	-9939717	5335630	North America	61955.6	32472.3	0	0	0	0	0	0	0	0	0	20.544	0	0	0	0	0	0	0	0	0	1580.63	0	0	0	0	0	0	0	0	0
724	Messina	Italy	Southern Europe	4.49284e+07	1341567	4585944	Europe	197008	0	0	0	0	197008	0	0	0	0	0	0	0	0	0	45	0	0	0	0	0	0	0	0	0	4377.95	0	0	0	0	0
906	Portland	United States of America	Northern America	2.55029e+08	-9845755	5397822	North America	311513	0	0	0	87267.5	217685	6559.93	0	0	0	0	0	0	0	81.3057	168.268	5.42603	0	0	0	0	0	0	0	1073.33	1293.68	1208.97	0	0	0	0
940	Reggio Calabria	Italy	Southern Europe	3.49437e+07	1351957	4576929	Europe	123052	0	0	6397.08	116655	0	0	0	0	0	0	0	0	2.75892	32.2411	0	0	0	0	0	0	0	0	2318.69	3618.2	0	0	0	0	0	0
170	Boditi	Ethiopia	Eastern Africa	4.9675e+06	3776900	858700	Africa	56584	0	0	0	0	0	0	0	56584	0	0	0	0	0	0	0	0	0	5	0	0	0	0	0	0	0	0	0	11316.8	0	0
1080	Tacoma	United States of America	Northern America	1.21062e+08	-9642971	5579847	North America	99489.6	0	0	25993.4	73387.8	108.361	0	0	0	0	0	0	0	25.212	95.6633	0.124717	0	0	0	0	0	0	0	1030.99	767.147	868.849	0	0	0	0	0
1127	Terrassa	Spain	Southern Europe	1.99837e+07	169250	4963000	Europe	149877	0	60784	89092.8	0	0	0	0	0	0	0	0	9.75486	10.2451	0	0	0	0	0	0	0	0	6231.15	8696.1	0	0	0	0	0	0	0
516	Karaj	Iran	Southern Asia	1.47684e+08	4489331	4309520	Asia	837567	14342.9	0	0	0	0	0	0	0	0	0	6.9293	0	0	0	0	0	0	0	0	0	2069.89	0	0	0	0	0	0	0	0	0
495	Joetsu	Japan	Eastern Asia	3.69327e+07	12034284	4472311	Asia	93805	0	0	0	0	0	9330.21	79202.5	5272.29	0	0	0	0	0	0	0	6.04196	28.7503	2.20773	0	0	0	0	0	0	0	1544.24	2754.84	2388.11	0	0
588	Kotabumi	Indonesia	South-Eastern Asia	1.9868e+07	10489900	-597800	Asia	172906	0	172906	0	0	0	0	0	0	0	0	0	20	0	0	0	0	0	0	0	0	0	8645.31	0	0	0	0	0	0	0	0
993	Sant Boi de Llobregat	Spain	Southern Europe	1.89835e+07	169658	4937132	Europe	129361	7052.36	0	0	0	0	0	0	0	0	0	1.95297	0	0	0	0	0	0	0	0	0	3611.09	0	0	0	0	0	0	0	0	0
910	Pringsewu	Indonesia	South-Eastern Asia	1.39079e+07	10492429	-661357	Asia	68767	0	12727.7	56039.2	0	0	0	0	0	0	0	0	2.67985	11.3202	0	0	0	0	0	0	0	0	4749.43	4950.4	0	0	0	0	0	0	0
211	Cebu City	Philippines	South-Eastern Asia	1.36141e+08	12294551	1272376	Asia	563498	85981.2	459912	17605.8	0	0	0	0	0	0	0	32.9336	93.9936	10.0727	0	0	0	0	0	0	0	2610.74	4893.01	1747.86	0	0	0	0	0	0	0
136	Barcelona	Spain	Southern Europe	2.58781e+08	180361	4948836	Europe	2.23209e+06	1.04385e+06	927639	226859	0	0	0	0	0	0	0	100.39	109.297	41.5673	0	0	0	0	0	0	0	10398	8487.3	5457.65	0	0	0	0	0	0	0
529	Kashiwazaki	Japan	Eastern Asia	1.7968e+07	12041611	4493222	Asia	71817.1	0	0	0	71817.1	0	0	0	0	0	0	0	0	0	18	0	0	0	0	0	0	0	0	0	3989.84	0	0	0	0	0	0
1011	Seattle	United States of America	Northern America	2.96178e+08	-9589122	5620784	North America	371903	174829	85027.8	10050.6	0	0	0	0	0	0	0	119.243	89.4149	8.93907	0	0	0	0	0	0	0	1466.16	950.936	1124.35	0	0	0	0	0	0	0
385	Granollers	Spain	Southern Europe	1.29895e+07	191346	4968115	Europe	58234.2	0	0	0	58234.2	0	0	0	0	0	0	0	0	0	13	0	0	0	0	0	0	0	0	0	4479.56	0	0	0	0	0	0
1031	Shone	Ethiopia	Eastern Africa	3.97404e+06	3785750	881750	Africa	51751.1	0	0	0	0	0	0	0	0	51751.1	0	0	0	0	0	0	0	0	0	4	0	0	0	0	0	0	0	0	0	12937.8	0
696	Mataró	Spain	Southern Europe	1.29893e+07	203885	4960577	Europe	87291.8	0	0	56814	30477.8	0	0	0	0	0	0	0	0	8.82982	4.17018	0	0	0	0	0	0	0	0	6434.33	7308.5	0	0	0	0	0	0
886	Pemanggilan	Indonesia	South-Eastern Asia	1.39079e+07	10514857	-653571	Asia	79574.3	0	0	51293.9	28280.4	0	0	0	0	0	0	0	0	12.3775	1.62249	0	0	0	0	0	0	0	0	4144.12	17430.3	0	0	0	0	0	0
990	Sanjo	Japan	Eastern Asia	2.09639e+07	12049738	4522595	Asia	81088.2	0	0	0	556.531	80531.7	0	0	0	0	0	0	0	0	0.363294	20.6367	0	0	0	0	0	0	0	0	1531.9	3902.35	0	0	0	0	0
1114	Tehran	Iran	Southern Asia	6.71549e+08	4522451	4300151	Asia	4.15157e+06	317222	196241	1.23854e+06	1.55345e+06	245591	0	0	0	0	0	74.4312	78.3096	206.173	202.156	44.6702	0	0	0	0	0	4261.94	2505.97	6007.25	7684.41	5497.87	0	0	0	0	0
121	Bandar Lampung	Indonesia	South-Eastern Asia	4.66909e+07	10521138	-669032	Asia	143396	0	0	0	13253.5	130142	0	0	0	0	0	0	0	0	5.38363	41.6164	0	0	0	0	0	0	0	0	2461.82	3127.19	0	0	0	0	0
374	Girona	Spain	Southern Europe	9.99281e+06	234100	5008900	Europe	58359.4	0	0	0	0	0	0	58218.3	141.058	0	0	0	0	0	0	0	0	9.66739	0.332609	0	0	0	0	0	0	0	0	6022.13	424.097	0	0
777	Nagoya	Japan	Eastern Asia	1.99545e+09	12108242	4237996	Asia	6.08667e+06	1.83249e+06	1.4595e+06	342563	0	0	0	0	0	0	0	416.824	467.161	147.507	0	0	0	0	0	0	0	4396.3	3124.18	2322.36	0	0	0	0	0	0	0
725	Metro	Indonesia	South-Eastern Asia	2.08616e+07	10528833	-632976	Asia	78824.6	0	53245.8	25578.8	0	0	0	0	0	0	0	0	13.0711	7.92887	0	0	0	0	0	0	0	0	4073.54	3226.04	0	0	0	0	0	0	0
773	Nagano	Japan	Eastern Asia	3.2936e+07	12081652	4411591	Asia	73830.1	0	0	0	0	0	0	74.6875	73755.5	0	0	0	0	0	0	0	0	0.0345218	32.9655	0	0	0	0	0	0	0	0	2163.48	2237.35	0	0
1142	Toluca	Mexico	Central America	6.26697e+07	-9636198	2366833	North America	83390.4	0	0	0	0	0	0	0	74114.5	9275.88	0	0	0	0	0	0	0	0	58.1355	4.86452	0	0	0	0	0	0	0	0	1274.86	1906.84	0
26	Aksaray	Turkey	Western Asia	1.59752e+07	2931438	4606625	Asia	55054.1	0	0	0	0	0	0	17289.6	37764.5	0	0	0	0	0	0	0	0	7.64094	8.35906	0	0	0	0	0	0	0	0	2262.76	4517.8	0	0
41	Alaba Kulito	Ethiopia	Eastern Africa	5.96113e+06	3798333	902667	Africa	84007.2	0	0	0	0	0	0	0	84007.2	0	0	0	0	0	0	0	0	0	6	0	0	0	0	0	0	0	0	0	14001.2	0	0
1049	Sohung	North Korea	Eastern Asia	3.99384e+06	10872500	4612000	Asia	55212.8	55212.8	0	0	0	0	0	0	0	0	0	4	0	0	0	0	0	0	0	0	0	13803.2	0	0	0	0	0	0	0	0	0
513	Kani	Japan	Eastern Asia	3.69182e+07	12096770	4272230	Asia	92439.5	0	0	0	92439.5	0	0	0	0	0	0	0	0	0	37	0	0	0	0	0	0	0	0	0	2498.37	0	0	0	0	0	0
130	Banjarmasin	Indonesia	South-Eastern Asia	8.94123e+06	10565944	-788722	Asia	73986.9	0	0	0	0	0	0	0	0	73986.9	0	0	0	0	0	0	0	0	0	9	0	0	0	0	0	0	0	0	0	8220.76	0
580	Koksan	North Korea	Eastern Asia	3.99418e+06	10875500	4653000	Asia	73114.3	0	0	73114.3	0	0	0	0	0	0	0	0	0	4	0	0	0	0	0	0	0	0	0	18278.6	0	0	0	0	0	0	0
700	Matsumoto	Japan	Eastern Asia	2.29532e+07	12101717	4363587	Asia	58305.4	0	0	0	0	0	0	58305.4	0	0	0	0	0	0	0	0	0	23	0	0	0	0	0	0	0	0	0	2535.02	0	0	0
927	Qarchak	Iran	Southern Asia	1.49665e+07	4561367	4261767	Asia	78227	0	58973.1	19253.9	0	0	0	0	0	0	0	0	9.23062	5.76938	0	0	0	0	0	0	0	0	6388.86	3337.26	0	0	0	0	0	0	0
180	Braja Asri	Indonesia	South-Eastern Asia	6.9539e+06	10567357	-638786	Asia	61414.2	0	0	0	61414.2	0	0	0	0	0	0	0	0	0	7	0	0	0	0	0	0	0	0	0	8773.46	0	0	0	0	0	0
1232	Yamagata	Japan	Eastern Asia	3.19495e+07	12104750	4592906	Asia	108420	0	0	0	0	0	0	0	0	108420	0	0	0	0	0	0	0	0	0	32	0	0	0	0	0	0	0	0	0	3388.13	0
1173	Ueda	Japan	Eastern Asia	2.39521e+07	12109750	4383000	Asia	92039.8	0	0	0	0	0	0	0	92039.8	0	0	0	0	0	0	0	0	0	24	0	0	0	0	0	0	0	0	0	3834.99	0	0
765	Munchon	North Korea	Eastern Asia	1.49798e+07	10890300	4705300	Asia	87637.3	6855.36	0	0	0	0	0	0	0	0	0	2.62852	0	0	0	0	0	0	0	0	0	2608.07	0	0	0	0	0	0	0	0	0
1086	Tajimi	Japan	Eastern Asia	2.49443e+07	12111740	4262180	Asia	76592.7	0	0	26283.3	50309.4	0	0	0	0	0	0	0	0	9.45689	15.5431	0	0	0	0	0	0	0	0	2779.27	3236.77	0	0	0	0	0	0
265	Cuernavaca	Mexico	Central America	6.36612e+07	-9607562	2323844	North America	85770.9	0	0	0	0	0	0	0	84296.4	1474.49	0	0	0	0	0	0	0	0	62.9389	1.06111	0	0	0	0	0	0	0	0	1339.34	1389.57	0
896	Pishva	Iran	Southern Asia	9.97764e+06	4569400	4258700	Asia	69577.2	0	15642.7	53934.6	0	0	0	0	0	0	0	0	3.20295	6.79705	0	0	0	0	0	0	0	0	4883.84	7934.99	0	0	0	0	0	0	0
240	Cilegon	Indonesia	South-Eastern Asia	3.27839e+07	10593712	-744258	Asia	100825	0	0	0	0	0	0	12804.2	88021.2	0	0	0	0	0	0	0	0	4.94137	28.0586	0	0	0	0	0	0	0	0	2591.22	3137.05	0	0
458	Iligan	Philippines	South-Eastern Asia	1.68908e+07	12373088	1016441	Asia	59598.8	0	0	0	59598.8	0	0	0	0	0	0	0	0	0	17	0	0	0	0	0	0	0	0	0	3505.81	0	0	0	0	0	0
728	Mexico City	Mexico	Central America	1.68715e+09	-9579471	2387290	North America	11138410	0	0	0	119134	1320554	1.95994e+06	3.44402e+06	3.39512e+06	897306	2331.25	0	0	0	40.2679	299.516	305.958	449.324	414.872	184.58	1.48307	0	0	0	2958.54	4408.96	6405.9	7664.91	8183.54	4861.35	1571.91
1122	Tengchong	China	Eastern Asia	1.49353e+07	9287633	3056433	Asia	82534.9	0	0	0	0	0	0	0	82534.9	0	0	0	0	0	0	0	0	0	15	0	0	0	0	0	0	0	0	0	5502.32	0	0
861	Pandeglang	Indonesia	South-Eastern Asia	1.58955e+07	10594750	-779000	Asia	152265	0	0	0	0	0	0	0	0	0	152265	0	0	0	0	0	0	0	0	0	16	0	0	0	0	0	0	0	0	0	9516.55
823	Okaya	Japan	Eastern Asia	2.49483e+07	12125420	4345500	Asia	81102.4	0	0	0	0	0	0	0	81037.9	64.5438	0	0	0	0	0	0	0	0	24.3111	0.688901	0	0	0	0	0	0	0	0	3333.37	93.6909	0
1241	Yirga Cheffe	Ethiopia	Eastern Africa	3.97383e+06	3815000	761000	Africa	67818.8	0	0	67818.8	0	0	0	0	0	0	0	0	0	3.99952	0.000483288	0	0	0	0	0	0	0	0	16956.8	0	0	0	0	0	0	0
1078	Tacloban	Philippines	South-Eastern Asia	2.38514e+07	12379583	1385292	Asia	82108.6	0	0	0	44739	37369.6	0	0	0	0	0	0	0	0	12.9372	11.0628	0	0	0	0	0	0	0	0	3458.16	3377.96	0	0	0	0	0
482	Jakarta	Indonesia	South-Eastern Asia	2.10913e+09	10667760	-781825	Asia	11548081	0	0	178790	2648403	3696429	1.57965e+06	959657	583192	1.74681e+06	155153	0	0	55.8293	450.395	686.905	326.413	198.193	110.21	269.914	25.1415	0	0	3202.44	5880.18	5381.28	4839.42	4842.04	5291.64	6471.72	6171.2
1073	Suwa	Japan	Eastern Asia	3.19334e+07	12137500	4339000	Asia	82867.1	0	0	0	0	0	0	0	9742.35	73124.7	0	0	0	0	0	0	0	0	5.93173	26.0683	0	0	0	0	0	0	0	0	1642.41	2805.12	0
686	Marawi	Philippines	South-Eastern Asia	9.73692e+07	12385643	987429	Asia	353249	0	0	0	0	0	120613	232635	0	0	0	0	0	0	0	0	31.6069	66.3931	0	0	0	0	0	0	0	0	3816.03	3503.91	0	0	0
939	Rangkasbitung	Indonesia	South-Eastern Asia	1.39086e+07	10608500	-785214	Asia	207734	0	0	0	0	0	0	0	207734	0	0	0	0	0	0	0	0	0	14	0	0	0	0	0	0	0	0	0	14838.1	0	0
1017	Sendai	Japan	Eastern Asia	2.30637e+08	12153335	4595400	Asia	783088	0	0	0	0	117466	450255	215367	0	0	0	0	0	0	0	53.253	119.338	58.4089	0	0	0	0	0	0	0	2205.81	3772.94	3687.22	0	0	0
261	Cotabato City	Philippines	South-Eastern Asia	1.98703e+07	12391000	891700	Asia	121779	0	0	0	0	5557.19	116222	0	0	0	0	0	0	0	0	1.34079	18.6592	0	0	0	0	0	0	0	0	4144.72	6228.67	0	0	0	0
1223	Wonsan	North Korea	Eastern Asia	3.09575e+07	10907274	4694435	Asia	276237	273694	2543.42	0	0	0	0	0	0	0	0	28.8739	2.12607	0	0	0	0	0	0	0	0	9478.92	1196.3	0	0	0	0	0	0	0	0
462	Inter-nishi	Japan	Eastern Asia	2.89493e+07	12147224	4507534	Asia	125814	0	0	0	0	0	0	0	7449.9	118364	0	0	0	0	0	0	0	0	3.82906	25.1709	0	0	0	0	0	0	0	0	1945.62	4702.4	0
195	Cagayan de Oro	Philippines	South-Eastern Asia	5.1667e+07	12407058	1048558	Asia	120122	0	27071.1	93051.3	0	0	0	0	0	0	0	0	8.20817	43.7918	0	0	0	0	0	0	0	0	3298.07	2124.86	0	0	0	0	0	0	0
530	Kayseri	Turkey	Western Asia	4.094e+07	3051061	4648695	Asia	120042	0	0	0	0	0	0	28701.4	87761.5	3579.09	0	0	0	0	0	0	0	7.35864	31.6549	1.9865	0	0	0	0	0	0	0	3900.36	2772.45	1801.71	0
107	Babol	Iran	Southern Asia	1.79647e+07	4608833	4400056	Asia	58796.4	0	58796.4	0	0	0	0	0	0	0	0	0	18	0	0	0	0	0	0	0	0	0	3266.47	0	0	0	0	0	0	0	0
854	Palabuhanratu	Indonesia	South-Eastern Asia	2.18571e+07	10630727	-864955	Asia	128255	0	0	0	0	0	0	48522.2	79732.8	0	0	0	0	0	0	0	0	15.0023	6.99769	0	0	0	0	0	0	0	0	3234.32	11394.2	0	0
456	Iida	Japan	Eastern Asia	2.89364e+07	12158293	4281534	Asia	90065.1	0	0	0	0	90065.1	0	0	0	0	0	0	0	0	0	29	0	0	0	0	0	0	0	0	0	3105.69	0	0	0	0	0
846	Paechon	North Korea	Eastern Asia	3.99346e+06	10919000	4564000	Asia	86533.5	86533.5	0	0	0	0	0	0	0	0	0	4	0	0	0	0	0	0	0	0	0	21633.4	0	0	0	0	0	0	0	0	0
300	Dilla	Ethiopia	Eastern Africa	7.94777e+06	3824625	792250	Africa	51023.7	0	0	0	0	51023.7	0	0	0	0	0	0	0	0	0	8	0	0	0	0	0	0	0	0	0	6377.97	0	0	0	0	0
586	Kosan	North Korea	Eastern Asia	4.99281e+06	10932900	4661300	Asia	71608.6	0	0	0	206.781	71401.8	0	0	0	0	0	0	0	0	0.796615	4.20338	0	0	0	0	0	0	0	0	259.575	16986.7	0	0	0	0	0
352	Fukushima	Japan	Eastern Asia	4.89174e+07	12165582	4539112	Asia	102642	0	0	0	0	0	0	0	45774.1	56867.7	0	0	0	0	0	0	0	0	23.6427	25.3573	0	0	0	0	0	0	0	0	1936.08	2242.65	0
241	Cipanas	Indonesia	South-Eastern Asia	4.76874e+07	10682917	-831708	Asia	433187	0	0	0	0	0	0	0	0	99638	333549	0	0	0	0	0	0	0	0	19.2533	28.7467	0	0	0	0	0	0	0	0	5175.12	11603
506	Kaesong	North Korea	Eastern Asia	1.3977e+07	10942286	4561929	Asia	200096	0	3077.45	197019	0	0	0	0	0	0	0	0	1.2834	12.7166	0	0	0	0	0	0	0	0	2397.9	15493	0	0	0	0	0	0	0
470	Ishinomaki	Japan	Eastern Asia	2.596e+07	12168192	4612808	Asia	59837.1	0	0	0	7681.28	52155.8	0	0	0	0	0	0	0	0	4.20629	21.7937	0	0	0	0	0	0	0	0	1826.14	2393.16	0	0	0	0	0
135	Baoshan	China	Eastern Asia	1.19485e+07	9346500	3067333	Asia	52039.6	0	0	132.828	51906.8	0	0	0	0	0	0	0	0	0.307909	11.6921	0	0	0	0	0	0	0	0	431.387	4439.48	0	0	0	0	0	0
1088	Takasaki [Maebashi]	Japan	Eastern Asia	1.32734e+08	12182492	4378605	Asia	448830	0	0	0	0	0	0	0	320353	128477	0	0	0	0	0	0	0	0	78.6487	54.3513	0	0	0	0	0	0	0	0	4073.21	2363.83	0
233	Chucko	Ethiopia	Eastern Africa	2.98044e+06	3826167	813833	Africa	61206.9	0	0	0	0	0	61206.9	0	0	0	0	0	0	0	0	0	3	0	0	0	0	0	0	0	0	0	20402.3	0	0	0	0
465	Irba	Ethiopia	Eastern Africa	2.9805e+06	3828167	855167	Africa	60817.8	0	0	0	0	0	0	5524.89	55292.9	0	0	0	0	0	0	0	0	1.3247	1.6753	0	0	0	0	0	0	0	0	4170.67	33004.8	0	0
584	Koriyama	Japan	Eastern Asia	3.79327e+07	12195921	4495816	Asia	99244.3	0	0	0	0	0	0	32884.5	66359.9	0	0	0	0	0	0	0	0	14.2963	23.7037	0	0	0	0	0	0	0	0	2300.21	2799.56	0	0
122	Bandung	Indonesia	South-Eastern Asia	5.35496e+08	10738127	-855457	Asia	3.45905e+06	0	0	0	0	0	0	0	913294	2.36295e+06	182810	0	0	0	0	0	0	0	221.339	271.709	45.9522	0	0	0	0	0	0	0	4126.23	8696.6	3978.25
469	Isesaki	Japan	Eastern Asia	8.28339e+07	12201946	4379608	Asia	223105	0	0	0	0	0	0	3794.09	176492	42818.5	0	0	0	0	0	0	0	2.23052	63.0149	17.7546	0	0	0	0	0	0	0	1700.99	2800.8	2411.69	0
466	Irgalem	Ethiopia	Eastern Africa	6.95442e+06	3833214	833500	Africa	95358.2	0	0	0	0	0	95358.2	0	0	0	0	0	0	0	0	0.0185036	6.9815	0	0	0	0	0	0	0	0	0	13658.7	0	0	0	0
919	Purwakarta	Indonesia	South-Eastern Asia	2.98044e+07	10724800	-809100	Asia	162381	0	0	0	0	0	0	83030.9	79349.8	0	0	0	0	0	0	0	0	16.8078	13.1922	0	0	0	0	0	0	0	0	4940.03	6014.88	0	0
578	Kofu	Japan	Eastern Asia	1.4768e+08	12209770	4297527	Asia	393678	0	0	0	0	0	28984.9	364693	0	0	0	0	0	0	0	0	11.3644	136.636	0	0	0	0	0	0	0	0	2550.49	2669.1	0	0	0
191	Butuan	Philippines	South-Eastern Asia	1.98726e+07	12488000	1106050	Asia	54348.2	35032.5	0	0	0	0	0	0	0	0	0	10.3498	0	0	0	0	0	0	0	0	0	3384.85	0	0	0	0	0	0	0	0	0
45	Aleta Wendo	Ethiopia	Eastern Africa	3.97393e+06	3835000	816000	Africa	76805.2	0	0	0	0	76805.2	0	0	0	0	0	0	0	0	0	4	0	0	0	0	0	0	0	0	0	19201.3	0	0	0	0	0
620	Leku	Ethiopia	Eastern Africa	4.96748e+06	3836100	849300	Africa	92043.3	0	0	0	0	0	0	92043.3	0	0	0	0	0	0	0	0	0	5	0	0	0	0	0	0	0	0	0	18408.7	0	0	0
835	Ota	Japan	Eastern Asia	1.06784e+08	12221407	4371509	Asia	256641	0	0	0	0	0	7085.59	248047	1508.63	0	0	0	0	0	0	0	3.99437	102.163	0.842681	0	0	0	0	0	0	0	1773.9	2427.96	1790.28	0	0
367	General Santos	Philippines	South-Eastern Asia	2.88102e+07	12501397	754672	Asia	72142.7	0	0	0	0	0	0	16659	55483.7	0	0	0	0	0	0	0	0	8.31244	20.6876	0	0	0	0	0	0	0	0	2004.11	2681.98	0	0
412	Hawassa	Ethiopia	Eastern Africa	1.78831e+07	3838333	872167	Africa	91902.6	0	0	0	0	0	0	0	20.5078	91882.1	0	0	0	0	0	0	0	0	0.118615	17.8814	0	0	0	0	0	0	0	0	172.894	5138.42	0
1100	Tarogong	Indonesia	South-Eastern Asia	8.14682e+07	10763829	-888598	Asia	554524	0	0	0	0	0	0	0	0	313589	240935	0	0	0	0	0	0	0	0	45.1758	36.8242	0	0	0	0	0	0	0	0	6941.52	6542.84
348	Fukaya	Japan	Eastern Asia	2.79428e+07	12223893	4357929	Asia	79801.2	0	0	0	0	0	79801.2	0	0	0	0	0	0	0	0	0	28	0	0	0	0	0	0	0	0	0	2850.04	0	0	0	0
913	Puebla	Mexico	Central America	1.92976e+08	-9506314	2337263	North America	569925	0	0	0	0	0	0	209074	352576	8274.74	0	0	0	0	0	0	0	73.7486	116.936	3.31489	0	0	0	0	0	0	0	2834.95	3015.11	2496.23	0
16	Addis Ababa	Ethiopia	Eastern Africa	1.52026e+08	3854310	1112637	Africa	882702	0	0	0	0	0	172386	694190	16125.7	0	0	0	0	0	0	0	25.5348	122.683	4.78188	0	0	0	0	0	0	0	6751.04	5658.39	3372.25	0	0
1058	Subang	Indonesia	South-Eastern Asia	1.29152e+07	10756654	-811115	Asia	95348.9	0	0	0	0	0	0	17186.6	78162.3	0	0	0	0	0	0	0	0	1.82944	11.1706	0	0	0	0	0	0	0	0	9394.46	6997.17	0	0
1186	Utsunomiya	Japan	Eastern Asia	7.28568e+07	12238637	4400240	Asia	174558	0	0	0	0	0	86452.7	88105.1	0	0	0	0	0	0	0	0	35.8169	37.1831	0	0	0	0	0	0	0	0	2413.74	2369.49	0	0	0
278	Davao City	Philippines	South-Eastern Asia	5.56365e+07	12530304	875679	Asia	208812	0	0	0	60952.3	147859	0	0	0	0	0	0	0	0	11.9301	44.0699	0	0	0	0	0	0	0	0	5109.13	3355.11	0	0	0	0	0
417	Hegarsari	Indonesia	South-Eastern Asia	2.28507e+07	10762283	-875891	Asia	112197	0	0	0	0	0	0	0	0	8061.94	104136	0	0	0	0	0	0	0	0	3.63613	19.3639	0	0	0	0	0	0	0	0	2217.18	5377.82
592	Kumagaya	Japan	Eastern Asia	1.69651e+07	12233441	4354618	Asia	60354.3	0	0	0	0	7834.18	52520.1	0	0	0	0	0	0	0	0	2.44957	14.5504	0	0	0	0	0	0	0	0	3198.18	3609.52	0	0	0	0
991	Sano	Japan	Eastern Asia	1.59678e+07	12235250	4373375	Asia	51880.5	0	0	0	0	0	51880.5	0	0	0	0	0	0	0	0	0	16	0	0	0	0	0	0	0	0	0	3242.53	0	0	0	0
219	Cherkessk	Russia	Eastern Europe	1.89963e+07	3425395	5256132	Europe	68820.8	6485.6	0	0	0	0	0	0	0	0	0	2.09589	0	0	0	0	0	0	0	0	0	3094.44	0	0	0	0	0	0	0	0	0
1065	Sumedang	Indonesia	South-Eastern Asia	1.98699e+07	10768550	-845350	Asia	111209	0	0	0	0	0	0	0	0	56324.4	54884.5	0	0	0	0	0	0	0	0	9.59744	10.4026	0	0	0	0	0	0	0	0	5868.7	5276.06
1140	Tokyo	Japan	Eastern Asia	4.54717e+09	12303605	4299383	Asia	24049534	2846558	4023502	4841142	3.91747e+06	3.20832e+06	1.60335e+06	572848	198176	186939	19.8834	480.915	632.203	829.749	694.668	621.984	351.928	156.661	73.5736	62.3884	0.0723551	5919.04	6364.26	5834.47	5639.34	5158.2	4555.91	3656.6	2693.57	2996.37	274.803
1139	Tochigi	Japan	Eastern Asia	1.7964e+07	12241222	4381611	Asia	55388	0	0	0	0	0	55388	0	0	0	0	0	0	0	0	0	18	0	0	0	0	0	0	0	0	0	3077.11	0	0	0	0
1102	Tasikmalaya	Indonesia	South-Eastern Asia	1.98704e+08	10790090	-900850	Asia	1.08332e+06	0	0	0	0	0	0	242089	210932	578307	51996	0	0	0	0	0	0	18.8701	43.3338	125.55	12.2459	0	0	0	0	0	0	12829.2	4867.6	4606.19	4245.98
345	Fujieda	Japan	Eastern Asia	7.98131e+07	12258038	4206575	Asia	160178	0	2854.58	69549.5	87774.1	0	0	0	0	0	0	0	1.25993	33.8801	44.8599	0	0	0	0	0	0	0	2265.67	2052.81	1956.63	0	0	0	0	0	0
344	Fuji	Japan	Eastern Asia	8.38098e+07	12262071	4244262	Asia	226788	0	0	0	0	0	0	0	119795	106993	0	0	0	0	0	0	0	0	53.2608	30.7392	0	0	0	0	0	0	0	0	2249.22	3480.68	0
838	Oyama	Japan	Eastern Asia	2.49496e+07	12255660	4371820	Asia	89993.7	0	0	0	11712.9	78280.8	0	0	0	0	0	0	0	0	4.69766	20.3023	0	0	0	0	0	0	0	0	2493.35	3855.75	0	0	0	0	0
1029	Shizuoka	Japan	Eastern Asia	1.27705e+08	12260602	4221953	Asia	392662	0	0	0	0	195144	197513	5.41475	0	0	0	0	0	0	0	57.2841	70.5601	0.155779	0	0	0	0	0	0	0	3406.6	2799.21	34.7592	0	0	0
88	Arsi Negelle	Ethiopia	Eastern Africa	7.94819e+06	3856250	908250	Africa	74003.3	0	0	0	0	0	0	0	0	74003.3	0	0	0	0	0	0	0	0	0	8	0	0	0	0	0	0	0	0	0	9250.42	0
505	Kadipaten	Indonesia	South-Eastern Asia	2.58307e+07	10802923	-831654	Asia	106205	0	0	0	0	0	0	0	106205	0	0	0	0	0	0	0	0	0	26	0	0	0	0	0	0	0	0	0	4084.8	0	0
666	Majalengka	Indonesia	South-Eastern Asia	7.94795e+06	10800250	-844500	Asia	51449.7	0	0	0	0	0	0	0	31904.4	19545.3	0	0	0	0	0	0	0	0	3.50067	4.49933	0	0	0	0	0	0	0	0	9113.82	4344.04	0
816	Numazu	Japan	Eastern Asia	1.06756e+08	12289042	4236276	Asia	380551	0	0	0	0	0	0	0	84162.8	296388	0	0	0	0	0	0	0	0	35.0663	71.9337	0	0	0	0	0	0	0	0	2400.1	4120.3	0
564	Kislovodsk	Russia	Eastern Europe	2.19942e+07	3490773	5222364	Europe	93688.6	0	0	534	93154.6	0	0	0	0	0	0	0	0	0.711418	21.2886	0	0	0	0	0	0	0	0	750.614	4375.8	0	0	0	0	0	0
1238	Yessentuki	Russia	Eastern Europe	2.29946e+07	3498196	5235848	Europe	82467.6	0	82467.6	0	0	0	0	0	0	0	0	0	23	0	0	0	0	0	0	0	0	0	3585.55	0	0	0	0	0	0	0	0
461	Indramayu	Indonesia	South-Eastern Asia	3.47714e+07	10814614	-784557	Asia	137192	0	0	0	98065.9	39125.7	0	0	0	0	0	0	0	0	18.4995	16.5005	0	0	0	0	0	0	0	0	5301	2371.19	0	0	0	0	0
427	Hitachi	Japan	Eastern Asia	5.68884e+07	12303079	4402254	Asia	116963	0	116963	0	0	0	0	0	0	0	0	0	57	0	0	0	0	0	0	0	0	0	2051.99	0	0	0	0	0	0	0	0
923	Pyatigorsk	Russia	Eastern Europe	2.79933e+07	3514964	5235107	Europe	139167	120081	19086	0	0	0	0	0	0	0	0	22.1072	5.89283	0	0	0	0	0	0	0	0	5431.74	3238.85	0	0	0	0	0	0	0	0
746	Mito	Japan	Eastern Asia	4.0918e+07	12305793	4379817	Asia	82863.9	0	82646.7	217.194	0	0	0	0	0	0	0	0	40.8472	0.152816	0	0	0	0	0	0	0	0	2023.31	1421.28	0	0	0	0	0	0	0
486	Jatibarang	Indonesia	South-Eastern Asia	1.49021e+07	10812633	-799700	Asia	58618	0	0	0	0	117.906	58500.1	0	0	0	0	0	0	0	0	0.239426	14.7606	0	0	0	0	0	0	0	0	492.455	3963.27	0	0	0	0
539	Kefole	Ethiopia	Eastern Africa	3.97403e+06	3869000	874000	Africa	52069.3	0	0	0	0	0	52069.3	0	0	0	0	0	0	0	0	0	4	0	0	0	0	0	0	0	0	0	13017.3	0	0	0	0
242	Cirebon	Indonesia	South-Eastern Asia	1.29153e+08	10830577	-828562	Asia	765487	0	0	0	0	0	0	54970.5	708047	2469.75	0	0	0	0	0	0	0	14.7446	113.774	1.48186	0	0	0	0	0	0	0	3728.18	6223.3	1666.65	0
1155	Tsuchiura	Japan	Eastern Asia	4.1913e+07	12313905	4344167	Asia	107628	54716.2	0	0	0	0	0	0	0	0	0	17.1809	0	0	0	0	0	0	0	0	0	3184.72	0	0	0	0	0	0	0	0	0
830	Orizaba	Mexico	Central America	2.58621e+07	-9405885	2314538	North America	85313.9	0	0	0	0	0	0	99.8594	85214.1	0	0	0	0	0	0	0	0	0.217086	25.7829	0	0	0	0	0	0	0	0	460	3305.06	0	0
596	Kuningan	Indonesia	South-Eastern Asia	8.44475e+07	10823465	-857947	Asia	276325	0	0	0	0	0	0	0	0	189474	86851.5	0	0	0	0	0	0	0	0	52.3334	32.6666	0	0	0	0	0	0	0	0	3620.51	2658.73
128	Banjar	Indonesia	South-Eastern Asia	1.29158e+07	10822577	-910654	Asia	82425.6	0	0	0	0	82425.6	0	0	0	0	0	0	0	0	0	13	0	0	0	0	0	0	0	0	0	6340.43	0	0	0	0	0
562	Kisarazu	Japan	Eastern Asia	5.08865e+07	12354794	4264245	Asia	126416	0	78218.5	48197.6	0	0	0	0	0	0	0	0	28.0496	22.9504	0	0	0	0	0	0	0	0	2788.57	2100.08	0	0	0	0	0	0	0
178	Bonsa Bota	Ethiopia	Eastern Africa	3.97391e+06	3876000	806000	Africa	74494.9	0	74494.9	0	0	0	0	0	0	0	0	0	4	0	0	0	0	0	0	0	0	0	18623.7	0	0	0	0	0	0	0	0
132	Banjarsari	Indonesia	South-Eastern Asia	6.95472e+06	10827786	-924500	Asia	57895.7	0	0	0	57895.7	0	0	0	0	0	0	0	0	0	7	0	0	0	0	0	0	0	0	0	8270.82	0	0	0	0	0	0
1130	Teziutlán	Mexico	Central America	1.98967e+07	-9397450	2431300	North America	58519.8	0	0	0	0	0	0	0	1557.42	56962.4	0	0	0	0	0	0	0	0	0.963097	19.0369	0	0	0	0	0	0	0	0	1617.09	2992.21	0
115	Baksan	Russia	Eastern Europe	1.69945e+07	3566912	5196382	Europe	62646	62646	0	0	0	0	0	0	0	0	0	17	0	0	0	0	0	0	0	0	0	3685.06	0	0	0	0	0	0	0	0	0
667	Majenang	Indonesia	South-Eastern Asia	9.9352e+06	10845300	-901600	Asia	103396	0	0	0	0	22283.3	81112.3	0	0	0	0	0	0	0	0	5.61316	4.38684	0	0	0	0	0	0	0	0	3969.83	18489.9	0	0	0	0
260	Córdoba	Mexico	Central America	2.38728e+07	-9389500	2319083	North America	57951.5	0	0	0	0	0	5406.26	52545.2	0	0	0	0	0	0	0	0	2.7854	21.2146	0	0	0	0	0	0	0	0	1940.93	2476.84	0	0	0
1203	Waled	Indonesia	South-Eastern Asia	3.17919e+07	10847750	-850906	Asia	113857	0	0	0	0	0	0	113857	0	0	0	0	0	0	0	0	0	32	0	0	0	0	0	0	0	0	0	3558.03	0	0	0
783	Nalchik	Russia	Eastern Europe	3.39876e+07	3580882	5176147	Europe	158203	140764	0	0	0	0	0	0	0	0	0	28.743	0	0	0	0	0	0	0	0	0	4897.34	0	0	0	0	0	0	0	0	0
645	Losari	Indonesia	South-Eastern Asia	2.78178e+07	10858071	-844786	Asia	109481	0	0	0	0	597.562	108884	0	0	0	0	0	0	0	0	1.06034	26.9397	0	0	0	0	0	0	0	0	563.557	4041.76	0	0	0	0
907	Poza Rica	Mexico	Central America	2.68635e+07	-9377981	2518019	North America	63932.3	63932.3	0	0	0	0	0	0	0	0	0	27	0	0	0	0	0	0	0	0	0	2367.86	0	0	0	0	0	0	0	0	0
547	Kersana	Indonesia	South-Eastern Asia	1.29155e+07	10863500	-856962	Asia	67592.3	0	0	0	0	2562.6	65029.7	0	0	0	0	0	0	0	0	1.16143	11.8386	0	0	0	0	0	0	0	0	2206.42	5493.03	0	0	0	0
934	Quiha	Ethiopia	Eastern Africa	4.97014e+06	3894900	1660300	Africa	64924.8	0	64924.8	0	0	0	0	0	0	0	0	0	5	0	0	0	0	0	0	0	0	0	12985	0	0	0	0	0	0	0	0
238	Cilacap	Indonesia	South-Eastern Asia	6.55739e+07	10866909	-950258	Asia	732854	0	0	0	18.0625	698239	34597.2	0	0	0	0	0	0	0	0.302417	53.7727	11.9249	0	0	0	0	0	0	0	59.7272	12985	2901.27	0	0	0	0
575	Kluwut	Indonesia	South-Eastern Asia	1.09285e+07	10868773	-848955	Asia	66562.3	0	0	0	0	55666.4	10895.9	0	0	0	0	0	0	0	0	8.86451	2.13549	0	0	0	0	0	0	0	0	6279.7	5102.3	0	0	0	0
1228	Xalapa	Mexico	Central America	4.17814e+07	-9363881	2398810	North America	119759	0	0	0	0	0	0	0	111589	8170.3	0	0	0	0	0	0	0	0	39.458	2.54205	0	0	0	0	0	0	0	0	2828.04	3214.06	0
1047	Siverek	Turkey	Western Asia	7.98648e+06	3405875	4536750	Asia	68771.7	0	0	0	0	0	68771.7	0	0	0	0	0	0	0	0	0	8	0	0	0	0	0	0	0	0	0	8596.46	0	0	0	0
93	Asella	Ethiopia	Eastern Africa	1.19227e+07	3898583	982333	Africa	50381.9	0	0	0	0	0	0	0	0	24399.7	25982.3	0	0	0	0	0	0	0	0	6.33879	5.66121	0	0	0	0	0	0	0	0	3849.27	4589.52
850	Paguyangan	Indonesia	South-Eastern Asia	8.94166e+06	10871611	-896944	Asia	53178.7	0	0	0	0	0	0	0	52697.8	480.92	0	0	0	0	0	0	0	0	8.78888	0.211118	0	0	0	0	0	0	0	0	5995.96	2277.97	0
499	Jubang	Indonesia	South-Eastern Asia	2.1857e+07	10872045	-859364	Asia	63793.5	0	0	0	0	0	41129.5	22664	0	0	0	0	0	0	0	0	12.8605	9.13955	0	0	0	0	0	0	0	0	3198.14	2479.77	0	0	0
689	Martínez de la Torre	Mexico	Central America	1.19385e+07	-9357667	2461750	North America	50566.7	0	0	0	0	50566.7	0	0	0	0	0	0	0	0	0	12	0	0	0	0	0	0	0	0	0	4213.89	0	0	0	0	0
15	Adama	Ethiopia	Eastern Africa	1.78848e+07	3909333	1054500	Africa	68435.5	0	0	0	0	0	0	0	0	68435.5	0	0	0	0	0	0	0	0	0	18	0	0	0	0	0	0	0	0	0	3801.97	0
1112	Tegalglagah	Indonesia	South-Eastern Asia	2.08635e+07	10874262	-853167	Asia	82047.9	0	0	0	0	0	82047.9	0	0	0	0	0	0	0	0	0	21	0	0	0	0	0	0	0	0	0	3907.04	0	0	0	0
0	Viran?ehir	Turkey	Western Asia	6.98735e+06	3459357	4477929	Asia	54532	0	0	0	0	753.672	53778.4	0	0	0	0	0	0	0	0	0.690477	6.30952	0	0	0	0	0	0	0	0	1091.52	8523.36	0	0	0	0
1201	Vladikavkaz	Russia	Eastern Europe	5.59738e+07	3682625	5127839	Europe	273067	0	0	0	0	0	149055	124012	0	0	0	0	0	0	0	0	38.3656	17.6344	0	0	0	0	0	0	0	0	3885.12	7032.39	0	0	0
301	Diyarbakir	Turkey	Western Asia	1.69719e+07	3478735	4555676	Asia	125051	0	0	0	0	0	125051	0	0	0	0	0	0	0	0	0	17	0	0	0	0	0	0	0	0	0	7355.96	0	0	0	0
1111	Tegal	Indonesia	South-Eastern Asia	2.64271e+08	10886955	-855474	Asia	1.15806e+06	0	0	0	0	0.375	378858	630101	149103	0	0	0	0	0	0	0.000476827	84.9403	141.018	40.0416	0	0	0	0	0	0	786.448	4460.29	4468.24	3723.71	0	0
303	Dodolla	Ethiopia	Eastern Africa	4.96751e+06	3909100	861700	Africa	56503.9	0	56503.9	0	0	0	0	0	0	0	0	0	5	0	0	0	0	0	0	0	0	0	11300.8	0	0	0	0	0	0	0	0
161	Binangun	Indonesia	South-Eastern Asia	6.95478e+06	10889786	-941643	Asia	53917.8	0	0	0	0	0	53917.8	0	0	0	0	0	0	0	0	0	7	0	0	0	0	0	0	0	0	0	7702.54	0	0	0	0
1193	Veracruz	Mexico	Central America	9.64899e+07	-9302284	2353655	North America	269013	349.219	147649	121014	0	0	0	0	0	0	0	0.204862	55.1265	41.6687	0	0	0	0	0	0	0	1704.66	2678.38	2904.19	0	0	0	0	0	0	0
1067	Sunzha	Russia	Eastern Europe	1.09955e+07	3703955	5156864	Europe	145971	0	144749	1222.45	0	0	0	0	0	0	0	0	10.6688	0.331193	0	0	0	0	0	0	0	0	13567.5	3691.05	0	0	0	0	0	0	0
92	Asassa	Ethiopia	Eastern Africa	5.96105e+06	3909667	877333	Africa	59046.4	0	54017.4	5029.01	0	0	0	0	0	0	0	0	4.51474	1.48526	0	0	0	0	0	0	0	0	11964.7	3385.95	0	0	0	0	0	0	0
921	Purwokerto	Indonesia	South-Eastern Asia	1.7188e+08	10895962	-913246	Asia	1.13606e+06	0	0	0	0	0	0	0	682766	442738	10552.2	0	0	0	0	0	0	0	82.0868	87.262	3.65124	0	0	0	0	0	0	0	8317.62	5073.66	2890.03
0	Mandijara	Indonesia	South-Eastern Asia	8.94177e+06	10910389	-922167	Asia	63571.6	0	0	0	0	0	0	63571.6	0	0	0	0	0	0	0	0	0	9	0	0	0	0	0	0	0	0	0	7063.51	0	0	0
885	Pemalang	Indonesia	South-Eastern Asia	5.46424e+07	10914227	-852591	Asia	381648	0	0	0	0	0	354308	27339.9	0	0	0	0	0	0	0	0	46.4464	8.55358	0	0	0	0	0	0	0	0	7628.32	3196.31	0	0	0
378	Gombong	Indonesia	South-Eastern Asia	2.18579e+07	10915500	-939500	Asia	196756	0	0	0	0	191631	5125.1	0	0	0	0	0	0	0	0	20.4234	1.57658	0	0	0	0	0	0	0	0	9382.9	3250.77	0	0	0	0
1219	Woldia	Ethiopia	Eastern Africa	7.95092e+06	3916000	1458625	Africa	64820	0	0	54355.5	10464.4	0	0	0	0	0	0	0	0	5.73312	2.26688	0	0	0	0	0	0	0	0	9480.97	4616.23	0	0	0	0	0	0
577	Kobo	Ethiopia	Eastern Africa	7.95116e+06	3917375	1498625	Africa	85508.8	0	0	0	0	85508.8	0	0	0	0	0	0	0	0	0	8	0	0	0	0	0	0	0	0	0	10688.6	0	0	0	0	0
638	Loning	Indonesia	South-Eastern Asia	1.88764e+07	10922026	-850447	Asia	107166	0	0	0	0	42636	64530.2	0	0	0	0	0	0	0	0	4.90491	14.0951	0	0	0	0	0	0	0	0	8692.5	4578.2	0	0	0	0
768	Mus	Turkey	Western Asia	7.98828e+06	3564500	4648750	Asia	69436.4	0	0	0	69436.4	0	0	0	0	0	0	0	0	0	8	0	0	0	0	0	0	0	0	0	8679.55	0	0	0	0	0	0
722	Mersa	Ethiopia	Eastern Africa	7.9508e+06	3924000	1438500	Africa	60740.5	0	0	0	60740.5	0	0	0	0	0	0	0	0	0	8	0	0	0	0	0	0	0	0	0	7592.57	0	0	0	0	0	0
535	Kebumen	Indonesia	South-Eastern Asia	4.86836e+07	10929786	-947765	Asia	478529	0	0	0	0	478529	0	0	0	0	0	0	0	0	0	49	0	0	0	0	0	0	0	0	0	9765.9	0	0	0	0	0
884	Pekalongan	Indonesia	South-Eastern Asia	1.8181e+08	10936937	-852352	Asia	976286	0	0	0	0	132023	414891	429371	0	0	0	0	0	0	0	36.4631	95.9869	50.5501	0	0	0	0	0	0	0	3620.74	4322.38	8493.98	0	0	0
295	Dessie	Ethiopia	Eastern Africa	2.18636e+07	3926227	1373955	Africa	102656	40378.8	0	0	0	0	0	0	0	0	0	13.2031	0	0	0	0	0	0	0	0	0	3058.28	0	0	0	0	0	0	0	0	0
131	Banjarnegara	Indonesia	South-Eastern Asia	2.0864e+07	10936595	-913214	Asia	211700	0	0	0	0	0	0	58461.6	153238	0	0	0	0	0	0	0	0	10.1475	10.8525	0	0	0	0	0	0	0	0	5761.18	14120.1	0	0
1023	Shangdu	China	Eastern Asia	6.99429e+06	9502214	4962786	Asia	82074.7	0	0	0	0	0	0	82074.7	0	0	0	0	0	0	0	0	0	7	0	0	0	0	0	0	0	0	0	11725	0	0	0
601	Kutoarjo	Indonesia	South-Eastern Asia	1.0929e+07	10953318	-954045	Asia	167293	0	0	0	0	0	167285	8.19612	0	0	0	0	0	0	0	0	10.5859	0.414112	0	0	0	0	0	0	0	0	15802.6	19.792	0	0	0
251	Coatzacoalcos	Mexico	Central America	4.07784e+07	-9172915	2228598	North America	68727.5	53946.4	14781.1	0	0	0	0	0	0	0	0	30.7757	10.2243	0	0	0	0	0	0	0	0	1752.89	1445.68	0	0	0	0	0	0	0	0
582	Kombolcha	Ethiopia	Eastern Africa	1.68945e+07	3935912	1366794	Africa	117714	112610	0	0	0	0	0	0	0	0	0	14.7703	0	0	0	0	0	0	0	0	0	7624.12	0	0	0	0	0	0	0	0	0
437	Huade	China	Eastern Asia	5.99557e+06	9509667	4999833	Asia	68137	0	68134.3	2.6897	0	0	0	0	0	0	0	0	5.39709	0.602909	0	0	0	0	0	0	0	0	12624.3	4.4612	0	0	0	0	0	0	0
1222	Wonosobo	Indonesia	South-Eastern Asia	4.47086e+07	10962033	-909878	Asia	300232	0	0	0	0	0	0	0	0	235074	65158	0	0	0	0	0	0	0	0	25.6937	19.3063	0	0	0	0	0	0	0	0	9149.06	3374.97
1170	Tuxtla Gutiérrez	Mexico	Central America	4.67374e+07	-9085628	2060904	North America	68950.8	0	0	6435.27	62515.6	0	0	0	0	0	0	0	0	4.70002	42.3	0	0	0	0	0	0	0	0	1369.2	1477.91	0	0	0	0	0	0
922	Purworejo	Indonesia	South-Eastern Asia	1.88774e+07	10962289	-953289	Asia	290096	0	0	0	0	0	428.219	289668	0	0	0	0	0	0	0	0	0.787964	18.212	0	0	0	0	0	0	0	0	543.45	15905.3	0	0	0
1206	Wates	Indonesia	South-Eastern Asia	7.94844e+06	10976375	-970750	Asia	140431	0	0	0	0	0	140431	0	0	0	0	0	0	0	0	0	8	0	0	0	0	0	0	0	0	0	17553.9	0	0	0	0
1098	Tapachula	Mexico	Central America	2.48546e+07	-9053260	1834780	North America	83651.7	0	0	0	0	0	0	48842.2	34809.5	0	0	0	0	0	0	0	0	13.2125	11.7875	0	0	0	0	0	0	0	0	3696.66	2953.09	0	0
870	Parakan	Indonesia	South-Eastern Asia	2.38445e+07	10976292	-900000	Asia	124844	0	0	0	0	0	0	0	0	57245.6	67598.7	0	0	0	0	0	0	0	0	8	16	0	0	0	0	0	0	0	0	7155.7	4224.92
1014	Semarang	Indonesia	South-Eastern Asia	3.20902e+08	11010187	-867450	Asia	1.60478e+06	0	0	0	0	493644	699584	307966	103586	0	0	0	0	0	0	103.464	134.747	51.9874	32.8021	0	0	0	0	0	0	4771.16	5191.85	5923.86	3157.93	0	0
975	San Cristóbal de las Casas	Mexico	Central America	2.38658e+07	-9039833	2057750	North America	80527	80527	0	0	0	0	0	0	0	0	0	23.9892	0.010805	0	0	0	0	0	0	0	0	3356.8	0	0	0	0	0	0	0	0	0
1191	Van	Turkey	Western Asia	2.09681e+07	3733452	4622214	Asia	86638.6	7694.15	0	0	0	0	0	0	0	0	0	4.15603	0	0	0	0	0	0	0	0	0	1851.32	0	0	0	0	0	0	0	0	0
1179	Ulanqab	China	Eastern Asia	3.09709e+07	9514113	4904145	Asia	324108	0	0	0	319026	5082.84	0	0	0	0	0	0	0	0	29.2133	1.78669	0	0	0	0	0	0	0	0	10920.6	2844.84	0	0	0	0	0
870	Parakan	Indonesia	South-Eastern Asia	1.58963e+07	10987000	-903875	Asia	136698	0	0	0	0	0	0	0	0	136698	0	0	0	0	0	0	0	0	0	16	0	0	0	0	0	0	0	0	0	8543.64	0
663	Magelang	Indonesia	South-Eastern Asia	3.67607e+07	10988365	-924851	Asia	426341	0	0	0	0	0	0	0	176351	249990	0	0	0	0	0	0	0	0	19.7546	17.2454	0	0	0	0	0	0	0	0	8927.08	14496.1	0
766	Muntilan	Indonesia	South-Eastern Asia	2.7819e+07	10993000	-936464	Asia	138859	0	0	0	0	0	0	0	22779.3	116079	0	0	0	0	0	0	0	0	8.57347	19.4265	0	0	0	0	0	0	0	0	2656.95	5975.31	0
187	Busisi	Dem. Rep. Congo	Middle Africa	5.9599e+06	2907833	-210333	Africa	78127.9	0	0	0	0	0	0	78127.9	0	0	0	0	0	0	0	0	0	6	0	0	0	0	0	0	0	0	0	13021.3	0	0	0
1242	Yogyakarta	Indonesia	South-Eastern Asia	3.48735e+08	11009942	-957913	Asia	1.73454e+06	0	0	0	0	0	1554.12	611728	1.11494e+06	6320.88	0	0	0	0	0	0	0.800754	121.999	226.495	1.70495	0	0	0	0	0	0	1940.83	5014.2	4922.56	3707.38	0
50	Ambarawa	Indonesia	South-Eastern Asia	1.29157e+07	11010192	-896423	Asia	85102.6	0	0	0	0	0	0	0	85010.5	92.094	0	0	0	0	0	0	0	0	12.9154	0.084563	0	0	0	0	0	0	0	0	6582.08	1089.06	0
965	Salatiga	Indonesia	South-Eastern Asia	2.0864e+07	11018738	-905833	Asia	129327	0	0	0	0	0	0	0	0	129327	0	0	0	0	0	0	0	0	0	21	0	0	0	0	0	0	0	0	0	6158.45	0
963	Sake	Dem. Rep. Congo	Middle Africa	6.95321e+06	2911500	-194500	Africa	100909	0	0	0	0	0	0	0	100909	0	0	0	0	0	0	0	0	0	7	0	0	0	0	0	0	0	0	0	14415.6	0	0
1221	Wonosari	Indonesia	South-Eastern Asia	1.68905e+07	11018206	-983206	Asia	152763	0	0	0	0	94601.7	58161.5	0	0	0	0	0	0	0	0	8.08092	8.91908	0	0	0	0	0	0	0	0	11706.8	6521.02	0	0	0	0
377	Goma	Dem. Rep. Congo	Middle Africa	3.37728e+07	2927971	-205412	Africa	171885	0	0	0	0	0	0	0	0.21875	171885	0	0	0	0	0	0	0	0	0.76594	33.2341	0	0	0	0	0	0	0	0	0.285597	5171.95	0
1070	Surakarta	Indonesia	South-Eastern Asia	2.99054e+08	11044686	-933447	Asia	1.31068e+06	0	0	0	0	0	282821	679537	195467	152855	0	0	0	0	0	0	45.8417	181.184	51.7742	22.2002	0	0	0	0	0	0	6169.51	3750.54	3775.37	6885.31	0
515	Kanyabayonga	Dem. Rep. Congo	Middle Africa	4.96654e+06	2923900	-86700	Africa	64140.6	0	0	64140.6	0	0	0	0	0	0	0	0	0	5	0	0	0	0	0	0	0	0	0	12828.1	0	0	0	0	0	0	0
291	Demak	Indonesia	South-Eastern Asia	8.94147e+06	11039500	-851500	Asia	82774	0	0	0	82774	0	0	0	0	0	0	0	0	0	9	0	0	0	0	0	0	0	0	0	9197.11	0	0	0	0	0	0
365	Gelemso	Ethiopia	Eastern Africa	4.96809e+06	4031300	1087900	Africa	54262.6	0	0	27529.5	26733	0	0	0	0	0	0	0	0	2.57821	2.42179	0	0	0	0	0	0	0	0	10677.8	11038.6	0	0	0	0	0	0
490	Jepara	Indonesia	South-Eastern Asia	7.74919e+07	11049308	-827038	Asia	433524	185148	233217	12442.3	0	0	0	0	0	0	0	30.0027	43.3806	2.61939	0	0	0	0	0	0	0	6171.05	5376.06	4750.08	0	0	0	0	0	0	0
1061	Sukoharjo	Indonesia	South-Eastern Asia	1.49031e+07	11047367	-948300	Asia	73103.7	0	0	0	0	0	13695	59408.6	0	0	0	0	0	0	0	0	3.54904	11.451	0	0	0	0	0	0	0	0	3858.8	5188.09	0	0	0
189	Butembo	Dem. Rep. Congo	Middle Africa	2.2846e+07	2936239	15457	Africa	64193.8	0	0	64193.8	0	0	0	0	0	0	0	0	0	23	0	0	0	0	0	0	0	0	0	2791.03	0	0	0	0	0	0	0
150	Bekonang	Indonesia	South-Eastern Asia	2.18579e+07	11053227	-940000	Asia	70855.7	0	0	0	0	0	0	60357	10498.7	0	0	0	0	0	0	0	0	19.1477	2.85227	0	0	0	0	0	0	0	0	3152.18	3680.84	0	0
1220	Wonogiri	Indonesia	South-Eastern Asia	1.78839e+07	11053056	-964611	Asia	202820	0	0	0	0	0	0	202820	0	0	0	0	0	0	0	0	0	18	0	0	0	0	0	0	0	0	0	11267.8	0	0	0
591	Kudus	Indonesia	South-Eastern Asia	5.16616e+07	11059808	-840404	Asia	348084	0	348084	0	0	0	0	0	0	0	0	0	51.986	0.014022	0	0	0	0	0	0	0	0	6695.73	0	0	0	0	0	0	0	0
155	Beni	Dem. Rep. Congo	Middle Africa	2.88059e+07	2953224	61293	Africa	478080	0	351130	126949	0	0	0	0	0	0	0	0	22.7062	6.29384	0	0	0	0	0	0	0	0	15464.1	20170.4	0	0	0	0	0	0	0
920	Purwodadi	Indonesia	South-Eastern Asia	1.88767e+07	11063026	-875605	Asia	201636	0	0	0	201636	0	0	0	0	0	0	0	0	0	19	0	0	0	0	0	0	0	0	0	10612.4	0	0	0	0	0	0
956	Rutshuru	Dem. Rep. Congo	Middle Africa	6.95318e+06	2949214	-142500	Africa	55297.1	0	0	0	0	0	0	55297.1	0	0	0	0	0	0	0	0	0	7	0	0	0	0	0	0	0	0	0	7899.59	0	0	0
842	Pacitan	Indonesia	South-Eastern Asia	1.68908e+07	11064559	-1012206	Asia	196765	0	0	0	196765	0	0	0	0	0	0	0	0	0	17	0	0	0	0	0	0	0	0	0	11574.4	0	0	0	0	0	0
1055	Sragen	Indonesia	South-Eastern Asia	2.38447e+07	11069292	-917417	Asia	197624	0	0	0	0	0	0	15452.2	182171	0	0	0	0	0	0	0	0	3.94734	20.0527	0	0	0	0	0	0	0	0	3914.59	9084.64	0	0
880	Pati	Indonesia	South-Eastern Asia	2.58307e+07	11080038	-834500	Asia	183025	178709	0	0	0	0	0	0	0	0	0	24.2522	0	0	0	0	0	0	0	0	0	7368.8	0	0	0	0	0	0	0	0	0
502	Juwana	Indonesia	South-Eastern Asia	1.58958e+07	11093250	-829688	Asia	107522	9242.81	0	0	0	0	0	0	0	0	0	4.27937	0	0	0	0	0	0	0	0	0	2159.85	0	0	0	0	0	0	0	0	0
185	Bunia	Dem. Rep. Congo	Middle Africa	2.78128e+07	3030786	193071	Africa	185639	185639	0	0	0	0	0	0	0	0	0	28	0	0	0	0	0	0	0	0	0	6629.98	0	0	0	0	0	0	0	0	0
903	Ponorogo	Indonesia	South-Eastern Asia	2.98066e+07	11108267	-971433	Asia	213370	0	0	0	0	0	0	164180	49190.7	0	0	0	0	0	0	0	0	18.9307	11.0693	0	0	0	0	0	0	0	0	8672.66	4443.89	0	0
661	Madiun	Indonesia	South-Eastern Asia	9.04121e+07	11113841	-940489	Asia	360137	0	0	0	0	0	0	249239	110899	0	0	0	0	0	0	0	0	59.6913	31.3087	0	0	0	0	0	0	0	0	4175.46	3542.1	0	0
498	Joresan	Indonesia	South-Eastern Asia	2.28519e+07	11108065	-979848	Asia	82606.2	0	0	0	0	0	0	81497.4	1108.81	0	0	0	0	0	0	0	0	22.3319	0.668123	0	0	0	0	0	0	0	0	3649.38	1659.59	0	0
800	Ngawi	Indonesia	South-Eastern Asia	1.29158e+07	11111423	-914808	Asia	104742	0	0	0	0	0	0	104742	0	0	0	0	0	0	0	0	0	13	0	0	0	0	0	0	0	0	0	8057.1	0	0	0
169	Blora	Indonesia	South-Eastern Asia	1.5896e+07	11115438	-860875	Asia	123521	0	0	123521	0	0	0	0	0	0	0	0	0	16	0	0	0	0	0	0	0	0	0	7720.07	0	0	0	0	0	0	0
1153	Trenggalek	Indonesia	South-Eastern Asia	1.88778e+07	11126763	-995553	Asia	103445	0	0	0	0	0	0	21238.5	82207	0	0	0	0	0	0	0	0	5.14074	13.8593	0	0	0	0	0	0	0	0	4131.41	5931.56	0	0
845	Padangan	Indonesia	South-Eastern Asia	2.18573e+07	11131591	-882909	Asia	133585	0	0	44202.3	89383.2	0	0	0	0	0	0	0	0	9.82216	12.1778	0	0	0	0	0	0	0	0	4500.26	7339.82	0	0	0	0	0	0
1166	Tulungagung	Indonesia	South-Eastern Asia	7.74983e+07	11148231	-996218	Asia	370900	0	0	0	0	0	2867	320600	47433.5	0	0	0	0	0	0	0	0.909203	63.2489	13.8419	0	0	0	0	0	0	0	3153.31	5068.86	3426.81	0	0
799	Nganjuk	Indonesia	South-Eastern Asia	6.75606e+07	11152824	-938294	Asia	250899	0	0	0	0	0	0	45229.2	205670	0	0	0	0	0	0	0	0	11.9363	56.0637	0	0	0	0	0	0	0	0	3789.22	3668.5	0	0
173	Bojonegoro	Indonesia	South-Eastern Asia	2.58313e+07	11159885	-883308	Asia	230231	0	0	230231	0	0	0	0	0	0	0	0	0	26	0	0	0	0	0	0	0	0	0	8855.04	0	0	0	0	0	0	0
538	Kediri	Indonesia	South-Eastern Asia	8.6439e+07	11163649	-964937	Asia	358460	0	0	0	0	0	0	117311	241149	0	0	0	0	0	0	0	0	30.3245	56.6755	0	0	0	0	0	0	0	0	3868.51	4254.91	0	0
166	Blitar	Indonesia	South-Eastern Asia	7.94857e+07	11173012	-1003338	Asia	259348	0	0	0	0	0	0	8560.58	250787	0	0	0	0	0	0	0	0	4.27077	75.7292	0	0	0	0	0	0	0	0	2004.46	3311.63	0	0
874	Pare	Indonesia	South-Eastern Asia	5.66323e+07	11178833	-958886	Asia	188871	0	0	0	0	0	0	13556.3	155423	19891.7	0	0	0	0	0	0	0	6.33495	43.6794	6.98565	0	0	0	0	0	0	0	2139.92	3558.28	2847.51	0
1159	Tuban	Indonesia	South-Eastern Asia	3.07984e+07	11179855	-852274	Asia	160648	42544.8	0	0	0	0	0	0	0	0	0	11.1156	0	0	0	0	0	0	0	0	0	3827.5	0	0	0	0	0	0	0	0	0
497	Jombang	Indonesia	South-Eastern Asia	4.2722e+07	11189244	-930616	Asia	253024	0	0	0	0	0	228170	24854.3	0	0	0	0	0	0	0	0	36.9122	6.08785	0	0	0	0	0	0	0	0	6181.43	4082.61	0	0	0
1069	Surabaya	Indonesia	South-Eastern Asia	6.96462e+08	11235222	-914297	Asia	3.60938e+06	0	0	0	0	0	918581	1.2225e+06	697563	517651	253090	0	0	0	0	0	135.099	169.437	189.197	144.549	62.719	0	0	0	0	0	6799.33	7215.07	3686.98	3581.15	4035.3
671	Malang	Indonesia	South-Eastern Asia	2.26531e+08	11221478	-979325	Asia	1.17465e+06	0	0	0	0	0	0	0	586917	549763	37966.5	0	0	0	0	0	0	0	103.478	117.866	6.65631	0	0	0	0	0	0	0	5671.91	4664.31	5703.83
610	Lamongan	Indonesia	South-Eastern Asia	1.19221e+07	11212250	-879750	Asia	70521.8	0	0	0	11643.2	58878.6	0	0	0	0	0	0	0	0	3.68378	8.31622	0	0	0	0	0	0	0	0	3160.66	7079.97	0	0	0	0	0
545	Kepanjen	Indonesia	South-Eastern Asia	1.49036e+07	11211833	-1003633	Asia	64490.8	0	0	0	0	0	0	0	64490.8	0	0	0	0	0	0	0	0	0	15	0	0	0	0	0	0	0	0	0	4299.39	0	0
379	Gondanglegi	Indonesia	South-Eastern Asia	1.78843e+07	11223167	-1009056	Asia	62690.8	0	0	0	0	0	0	0.0117188	62690.8	0	0	0	0	0	0	0	0	0.00442011	17.9956	0	0	0	0	0	0	0	0	2.65123	3483.68	0	0
909	Prigen	Indonesia	South-Eastern Asia	9.93544e+06	11225800	-949800	Asia	71822.7	0	0	0	0	0	0	0	0	0	71822.7	0	0	0	0	0	0	0	0	0	10	0	0	0	0	0	0	0	0	0	7182.27
386	Gresik	Indonesia	South-Eastern Asia	4.86821e+07	11234684	-885051	Asia	268025	0	0	0	0	134162	133862	0	0	0	0	0	0	0	0	23.0966	25.9034	0	0	0	0	0	0	0	0	5808.75	5167.75	0	0	0	0
123	Bangkalan	Indonesia	South-Eastern Asia	1.68896e+07	11247794	-867794	Asia	123253	0	0	906.789	122346	0	0	0	0	0	0	0	0	0.961152	16.0388	0	0	0	0	0	0	0	0	943.44	7628.1	0	0	0	0	0	0
879	Pasuruan	Indonesia	South-Eastern Asia	2.3845e+07	11252750	-944333	Asia	102134	0	0	0	0	0	0	82412.5	19721.9	0	0	0	0	0	0	0	0	17.6308	6.36922	0	0	0	0	0	0	0	0	4674.35	3096.44	0	0
911	Probolinggo	Indonesia	South-Eastern Asia	6.85548e+07	11281601	-958833	Asia	215500	0	0	0	0	0	0	45663.8	169836	0	0	0	0	0	0	0	0	15.1633	53.8367	0	0	0	0	0	0	0	0	3011.46	3154.65	0	0
652	Lumajang	Indonesia	South-Eastern Asia	1.98714e+07	11276950	-1002900	Asia	199577	0	0	0	0	0	0	0	145773	53803.2	0	0	0	0	0	0	0	0	11.8155	8.18445	0	0	0	0	0	0	0	0	12337.4	6573.83	0
796	Nenjiang	China	Eastern Asia	1.30125e+07	9627115	5786577	Asia	132971	0	0	0	0	132971	0	0	0	0	0	0	0	0	0	13	0	0	0	0	0	0	0	0	0	10228.6	0	0	0	0	0
970	Sampang	Indonesia	South-Eastern Asia	1.78833e+07	11294222	-889500	Asia	184687	0	184687	0	0	0	0	0	0	0	0	0	17.8587	0.141333	0	0	0	0	0	0	0	0	10341.6	0	0	0	0	0	0	0	0
118	Balung	Indonesia	South-Eastern Asia	3.5769e+07	11307639	-1027250	Asia	187856	0	0	0	0	0	102215	85640.9	0	0	0	0	0	0	0	0	18.4963	17.5037	0	0	0	0	0	0	0	0	5526.24	4892.74	0	0	0
590	Kraksaan	Indonesia	South-Eastern Asia	1.19226e+07	11302833	-958333	Asia	69199.9	0	0	0	0	0	0	0	69199.9	0	0	0	0	0	0	0	0	0	12	0	0	0	0	0	0	0	0	0	5766.66	0	0
489	Jember	Indonesia	South-Eastern Asia	6.65695e+07	11322336	-1010619	Asia	559915	0	0	0	0	0	0	12517.2	547398	0	0	0	0	0	0	0	0	6.41376	60.5862	0	0	0	0	0	0	0	0	1951.62	9035.02	0	0
858	Pamekasan	Indonesia	South-Eastern Asia	3.87469e+07	11319705	-882782	Asia	250669	159780	90889.8	0	0	0	0	0	0	0	0	28.2305	10.7695	0	0	0	0	0	0	0	0	5659.82	8439.54	0	0	0	0	0	0	0	0
176	Bondowoso	Indonesia	South-Eastern Asia	1.7884e+07	11340722	-978000	Asia	170388	0	0	0	0	0	0	16846	153542	0	0	0	0	0	0	0	0	3.88577	14.1142	0	0	0	0	0	0	0	0	4335.31	10878.5	0	0
1046	Situbondo	Indonesia	South-Eastern Asia	2.78192e+07	11361036	-951250	Asia	171874	0	0	0	0	0	169285	2588.81	0	0	0	0	0	0	0	0.0101445	26.9398	1.05007	0	0	0	0	0	0	0	0	6283.85	2465.37	0	0	0
511	Kalianget	Indonesia	South-Eastern Asia	1.98701e+07	11364500	-870150	Asia	52226.3	8455.14	0	0	0	0	0	0	0	0	0	4.29549	0	0	0	0	0	0	0	0	0	1968.38	0	0	0	0	0	0	0	0	0
323	Elizovskiy rayon	Russia	Eastern Europe	4.8089e+07	11565250	6189250	Europe	156586	0	0	0	0	0	0	0.015625	156586	0	0	0	0	0	0	0	0	0.912862	47.0871	0	0	0	0	0	0	0	0	0.0171165	3325.46	0	0
368	Genteng	Indonesia	South-Eastern Asia	1.1923e+07	11365500	-1032417	Asia	74891.7	0	0	0	0	0	0	4307.48	70584.2	0	0	0	0	0	0	0	0	2.03004	9.96996	0	0	0	0	0	0	0	0	2121.87	7079.69	0	0
764	Muncar	Indonesia	South-Eastern Asia	1.09295e+07	11382045	-1042045	Asia	80976.8	0	0	0	0	0	80976.8	0	0	0	0	0	0	0	0	0	11	0	0	0	0	0	0	0	0	0	7361.53	0	0	0	0
134	Banyuwangi	Indonesia	South-Eastern Asia	2.88137e+07	11389672	-1014190	Asia	244740	0	0	0	0	0	0	0	242526	2214.38	0	0	0	0	0	0	0	0	28.1723	0.827688	0	0	0	0	0	0	0	0	8608.66	2675.38	0
793	Negara	Indonesia	South-Eastern Asia	9.93587e+06	11412600	-1032200	Asia	76241.4	0	0	0	0	76241.4	0	0	0	0	0	0	0	0	0	10	0	0	0	0	0	0	0	0	0	7624.14	0	0	0	0	0
1045	Singaraja	Indonesia	South-Eastern Asia	1.98714e+07	11462650	-1002450	Asia	131377	0	0	0	0	0	0	0	21314.1	110063	0	0	0	0	0	0	0	0	4.46557	15.5344	0	0	0	0	0	0	0	0	4772.99	7085.11	0
293	Denpasar	Indonesia	South-Eastern Asia	1.709e+08	11464785	-1068895	Asia	296755	0	0	0	0	9056.66	163691	52518	71489.6	0	0	0	0	0	0	7.09283	122.22	29.107	13.5799	0	0	0	0	0	0	1276.88	1339.31	1804.31	5264.35	0	0
695	Mataram	Indonesia	South-Eastern Asia	6.25969e+07	11555579	-1058516	Asia	202505	0	0	0	0	0	202347	158.612	0	0	0	0	0	0	0	0	62.71	0.289972	0	0	0	0	0	0	0	0	3226.7	546.992	0	0	0
908	Praya	Indonesia	South-Eastern Asia	9.93611e+06	11570300	-1075100	Asia	106192	0	0	0	0	0	0	106192	0	0	0	0	0	0	0	0	0	10	0	0	0	0	0	0	0	0	0	10619.2	0	0	0
1013	Selong	Indonesia	South-Eastern Asia	2.68274e+07	11594537	-1066796	Asia	153812	0	0	0	0	0	0	646.375	153166	0	0	0	0	0	0	0	0	0.913345	26.0867	0	0	0	0	0	0	0	0	707.7	5871.42	0	0
1063	Sumbawa Besar	Indonesia	South-Eastern Asia	1.29167e+07	11688192	-1048731	Asia	83366.2	0	0	8052.84	75313.4	0	0	0	0	0	0	0	0	4.34044	8.65956	0	0	0	0	0	0	0	0	1855.31	8697.13	0	0	0	0	0	0
306	Dompu	Indonesia	South-Eastern Asia	8.94239e+06	11788833	-1054833	Asia	57417.2	0	0	0	17835.1	39582.1	0	0	0	0	0	0	0	0	1.38342	7.61658	0	0	0	0	0	0	0	0	12892.1	5196.84	0	0	0	0	0
159	Bima	Indonesia	South-Eastern Asia	1.68911e+07	11820147	-1044618	Asia	62794.5	0	0	0	0	0	62794.5	0	0	0	0	0	0	0	0	0	17	0	0	0	0	0	0	0	0	0	3693.79	0	0	0	0
794	Nehe	China	Eastern Asia	1.20096e+07	9683333	5713333	Asia	107493	94859.6	0	0	0	0	0	0	0	0	0	8.53544	0	0	0	0	0	0	0	0	0	11113.6	0	0	0	0	0	0	0	0	0
955	Ruteng	Indonesia	South-Eastern Asia	1.09296e+07	11989045	-1063318	Asia	70517.2	0	0	0	0	0	0	0	0	0	70517.2	0	0	0	0	0	0	0	0	0.00661164	10.9934	0	0	0	0	0	0	0	0	0	6414.51
325	Ende	Indonesia	South-Eastern Asia	1.58979e+07	12103375	-1091625	Asia	110134	0	0	0	0	0	0	0	0	0	110134	0	0	0	0	0	0	0	0	0	16	0	0	0	0	0	0	0	0	0	6883.35
701	Maumere	Indonesia	South-Eastern Asia	1.49041e+07	12163033	-1063967	Asia	102769	0	0	0	0	0	0	14.8281	102754	0	0	0	0	0	0	0	0	0.145758	14.8542	0	0	0	0	0	0	0	0	101.731	6917.52	0	0
673	Manado	Indonesia	South-Eastern Asia	4.46992e+07	12510056	182989	Asia	192146	0	0	0	0	0	0	0	0	192144	1.46094	0	0	0	0	0	0	0	0	44.9322	0.0677886	0	0	0	0	0	0	0	0	4276.31	21.5514
165	Bitung	Indonesia	South-Eastern Asia	1.98663e+07	12542050	178200	Asia	56490.7	0	0	0	0	0	0	0	0	8004.43	48486.3	0	0	0	0	0	0	0	0	4.74094	15.2591	0	0	0	0	0	0	0	0	1688.36	3177.54
550	Keshan	China	Eastern Asia	9.00628e+06	9815833	5665500	Asia	57901	0	19970.5	37930.4	0	0	0	0	0	0	0	0	4.51598	4.48402	0	0	0	0	0	0	0	0	4422.19	8459.02	0	0	0	0	0	0	0
148	Bei'an	China	Eastern Asia	1.50112e+07	9839300	5688233	Asia	103019	0	0	0	25703.5	77315.3	0	0	0	0	0	0	0	0	4.59235	10.4076	0	0	0	0	0	0	0	0	5597.02	7428.7	0	0	0	0	0
309	Dongfeng	China	Eastern Asia	8.995e+06	10389944	5086389	Asia	85491.2	45.3359	85445.9	0	0	0	0	0	0	0	0	0.266259	8.73374	0	0	0	0	0	0	0	0	170.27	9783.42	0	0	0	0	0	0	0	0
865	Panshi	China	Eastern Asia	1.19941e+07	10405750	5115167	Asia	65657.9	0	0	65657.9	0	0	0	0	0	0	0	0	0	12	0	0	0	0	0	0	0	0	0	5471.49	0	0	0	0	0	0	0
713	Meihekou	China	Eastern Asia	1.99882e+07	10417300	5070450	Asia	163419	0	0	160671	2748.38	0	0	0	0	0	0	0	0	18.6483	1.35175	0	0	0	0	0	0	0	0	8615.85	2033.2	0	0	0	0	0	0
444	Huinan	China	Eastern Asia	8.99501e+06	10431056	5086833	Asia	116680	0	0	0	0	116680	0	0	0	0	0	0	0	0	0	9	0	0	0	0	0	0	0	0	0	12964.4	0	0	0	0	0
634	Liuhe	China	Eastern Asia	1.19922e+07	10448833	5042333	Asia	92848.2	0	0	0	91974.5	873.645	0	0	0	0	0	0	0	0	11.761	0.239036	0	0	0	0	0	0	0	0	7820.32	3654.86	0	0	0	0	0
438	Huadian	China	Eastern Asia	1.89908e+07	10458553	5118605	Asia	100487	0	0	100487	0	0	0	0	0	0	0	0	0	19	0	0	0	0	0	0	0	0	0	5288.77	0	0	0	0	0	0	0
760	Mudanjiang	China	Eastern Asia	8.79904e+07	10515989	5294659	Asia	584536	381.125	502345	81809.4	0	0	0	0	0	0	0	0.277941	69.1911	18.531	0	0	0	0	0	0	0	1371.25	7260.26	4414.73	0	0	0	0	0	0	0
1146	Tonghua	China	Eastern Asia	5.99527e+06	10511500	4976000	Asia	62176.4	62176.4	0	0	0	0	0	0	0	0	0	6	0	0	0	0	0	0	0	0	0	10362.7	0	0	0	0	0	0	0	0	0
1146	Tonghua	China	Eastern Asia	3.19752e+07	10522125	4981875	Asia	297851	0	284578	13272.6	0	0	0	0	0	0	0	0	21.2298	10.7702	0	0	0	0	0	0	0	0	13404.7	1232.35	0	0	0	0	0	0	0
327	Erdaojiang	China	Eastern Asia	9.99236e+06	10525400	4987300	Asia	60441.1	0	0	60441.1	0	0	0	0	0	0	0	0	0	9.84515	0.154846	0	0	0	0	0	0	0	0	6139.17	0	0	0	0	0	0	0
806	Ning'an	China	Eastern Asia	1.1998e+07	10532000	5268250	Asia	67614.8	0	0	0	660.148	66954.6	0	0	0	0	0	0	0	0	1.09934	10.9007	0	0	0	0	0	0	0	0	600.495	6142.25	0	0	0	0	0
315	Dunhua	China	Eastern Asia	2.59897e+07	10539731	5161500	Asia	205782	205782	0	0	0	0	0	0	0	0	0	25.6494	0.350567	0	0	0	0	0	0	0	0	8022.88	0	0	0	0	0	0	0	0	0
111	Baishan	China	Eastern Asia	1.0992e+07	10541591	5004864	Asia	128244	0	0	0	0	0	128244	0	0	0	0	0	0	0	0	0	11	0	0	0	0	0	0	0	0	0	11658.6	0	0	0	0
441	Huanglong	China	Eastern Asia	1.89021e+07	10567395	2441974	Asia	58705.1	0	0	58705.1	0	0	0	0	0	0	0	0	0	19	0	0	0	0	0	0	0	0	0	3089.74	0	0	0	0	0	0	0
631	Lingao County	China	Eastern Asia	9.94849e+06	10582000	2442500	Asia	67779.4	0	0	0	0	67779.4	0	0	0	0	0	0	0	0	0	10	0	0	0	0	0	0	0	0	0	6777.94	0	0	0	0	0
632	Linjiang	China	Eastern Asia	8.9932e+06	10594944	4991389	Asia	92981.2	0	0	0	92981.2	0	0	0	0	0	0	0	0	0	9	0	0	0	0	0	0	0	0	0	10331.2	0	0	0	0	0	0
1230	Xuwen	China	Eastern Asia	1.0944e+07	10611409	2493409	Asia	95033.6	0	0	0	0	0	95033.6	0	0	0	0	0	0	0	0	0	11	0	0	0	0	0	0	0	0	0	8639.42	0	0	0	0
218	Chengmai County	China	Eastern Asia	8.95341e+06	10620500	2421167	Asia	70731.2	0	0	0	0	0	0	46228.7	24502.5	0	0	0	0	0	0	0	0	5.4029	3.5971	0	0	0	0	0	0	0	0	8556.27	6811.74	0	0
1229	Xiuying District	China	Eastern Asia	8.8543e+07	10639208	2455545	Asia	377789	0	0	0	0	0	0	0	21547.1	356060	181.147	0	0	0	0	0	0	0	7.27231	81.703	0.0246433	0	0	0	0	0	0	0	2962.89	4357.98	7350.75
1167	Tunchang County	China	Eastern Asia	6.96339e+06	10643929	2377357	Asia	51465	0	0	0	48735.6	2729.45	0	0	0	0	0	0	0	0	5.44734	1.55266	0	0	0	0	0	0	0	0	8946.68	1757.92	0	0	0	0	0
928	Qionghai	China	Eastern Asia	8.95277e+06	10684611	2362056	Asia	109528	0	0	109528	0	0	0	0	0	0	0	0	0	9	0	0	0	0	0	0	0	0	0	12169.8	0	0	0	0	0	0	0
639	Lori	Armenia	Western Asia	2.09792e+07	3751214	4879357	Asia	103765	0	0	0	0	0	32298.1	71466.6	0	0	0	0	0	0	0	0	10.1283	10.8717	0	0	0	0	0	0	0	0	3188.9	6573.62	0	0	0
11	Aceh Utara	Indonesia	South-Eastern Asia	1.98683e+07	9689050	648700	Asia	62738.9	0	0	0	0	62738.9	0	0	0	0	0	0	0	0	0	20	0	0	0	0	0	0	0	0	0	3136.94	0	0	0	0	0
0	Köln	Germany	Western Europe	2.60352e+07	518231	5963192	Europe	66725.7	0	8885.35	57840.4	0	0	0	0	0	0	0	0	3.42454	22.5755	0	0	0	0	0	0	0	0	2594.61	2562.09	0	0	0	0	0	0	0
1244	Yonezawa	Japan	Eastern Asia	1.59735e+07	12121125	4554375	Asia	75532.8	0	0	0	0	0	0	0	73974.3	1558.48	0	0	0	0	0	0	0	0	15.5662	0.433828	0	0	0	0	0	0	0	0	4752.25	3592.4	0
0	Ragusa	Italy	Southern Europe	8.9831e+06	1283611	4442389	Europe	50099.1	50099.1	0	0	0	0	0	0	0	0	0	9	0	0	0	0	0	0	0	0	0	5566.57	0	0	0	0	0	0	0	0	0
0	Shahriyar	Iran	Southern Asia	1.29719e+07	4499885	4297654	Asia	120735	44114.5	0	0	0	0	0	0	0	0	0	6.99593	0	0	0	0	0	0	0	0	0	6305.74	0	0	0	0	0	0	0	0	0
495	Joetsu	Japan	Eastern Asia	1.39743e+07	12039786	4464429	Asia	72428.3	0	0	0	0	0	0	76.4688	72351.8	0	0	0	0	0	0	0	0	0.0993222	13.9007	0	0	0	0	0	0	0	0	769.906	5204.91	0	0
0	T'ongch'?n	North Korea	Eastern Asia	5.99151e+06	10964333	4672667	Asia	57228.9	0	57228.9	0	0	0	0	0	0	0	0	0	6	0	0	0	0	0	0	0	0	0	9538.15	0	0	0	0	0	0	0	0
0	Gurage	Ethiopia	Eastern Africa	2.9807e+06	3832167	995833	Africa	50130.2	0	0	0	0	0	0	0	0	50130.2	0	0	0	0	0	0	0	0	0	3	0	0	0	0	0	0	0	0	0	16710.1	0
0	Butig	Philippines	South-Eastern Asia	8.04779e+07	12389512	971290	Asia	285227	0	0	0	0	0	0	13304	228395	43527.2	0	0	0	0	0	0	0	6.02622	59.7112	15.2626	0	0	0	0	0	0	0	2207.69	3825	2851.88	0
0	Sakata	Japan	Eastern Asia	3.19544e+07	11991531	4667938	Asia	94358.2	0	0	0	0	0	0	2502.05	91856.1	0	0	0	0	0	0	0	0	3.86339	28.1366	0	0	0	0	0	0	0	0	647.63	3264.65	0	0
111	Baishan	China	Eastern Asia	7.99502e+06	10525250	5054625	Asia	54585.1	0	0	0	0	0	0	0	54585.1	0	0	0	0	0	0	0	0	0	8	0	0	0	0	0	0	0	0	0	6823.14	0	0
111	Baishan	China	Eastern Asia	9.99327e+06	10604800	5030900	Asia	55822.6	0	0	0	0	55822.6	0	0	0	0	0	0	0	0	0	10	0	0	0	0	0	0	0	0	0	5582.26	0	0	0	0	0
0	Maku	Iran	Southern Asia	1.69772e+07	3801794	4710029	Asia	91991.4	0	0	0	0	4602.65	87388.7	0	0	0	0	0	0	0	0	1.6675	15.3325	0	0	0	0	0	0	0	0	2760.21	5699.57	0	0	0	0
0	Kanoya	Japan	Eastern Asia	2.29292e+07	11890804	3805239	Asia	68472.2	0	0	0	0	0	0	9396.76	59075.5	0	0	0	0	0	0	0	0	5.1152	17.8848	0	0	0	0	0	0	0	0	1837.03	3303.11	0	0
0	Shahriyar	Iran	Southern Asia	1.49676e+07	4505767	4296767	Asia	67279.3	67279.3	0	0	0	0	0	0	0	0	0	15	0	0	0	0	0	0	0	0	0	4485.28	0	0	0	0	0	0	0	0	0
0	Ulaan Chab	China	Eastern Asia	7.99203e+06	9544875	4876750	Asia	58298.7	33944.6	24354	0	0	0	0	0	0	0	0	4.02611	3.97389	0	0	0	0	0	0	0	0	8431.12	6128.52	0	0	0	0	0	0	0	0
0	Munai	Philippines	South-Eastern Asia	4.37164e+07	12367568	972523	Asia	137872	0	0	0	0	0	0	132261	5610.14	0	0	0	0	0	0	0	0	41.4377	2.56227	0	0	0	0	0	0	0	0	3191.81	2189.52	0	0
1026	Shibata	Japan	Eastern Asia	1.79704e+07	12049000	4558944	Asia	67328.1	0	0	0	37069.5	30258.7	0	0	0	0	0	0	0	0	8.79804	9.20196	0	0	0	0	0	0	0	0	4213.38	3288.28	0	0	0	0	0
0	Ulaan Chab	China	Eastern Asia	6.99411e+06	9481786	4950929	Asia	55130.7	0	0	0	0	0	0	0	0	55130.7	0	0	0	0	0	0	0	0	0	7	0	0	0	0	0	0	0	0	0	7875.81	0
0	Mihara	Japan	Eastern Asia	1.79561e+07	11839500	4153833	Asia	50929.6	50929.6	0	0	0	0	0	0	0	0	0	18	0	0	0	0	0	0	0	0	0	2829.42	0	0	0	0	0	0	0	0	0
261	Cotabato City	Philippines	South-Eastern Asia	1.39092e+07	12389143	884929	Asia	111892	0	0	0	0	111892	0	0	0	0	0	0	0	0	0	14	0	0	0	0	0	0	0	0	0	7992.31	0	0	0	0	0
0	Catanzaro	Italy	Southern Europe	1.39802e+07	1397857	4673214	Europe	55798.5	55798.5	0	0	0	0	0	0	0	0	0	14	0	0	0	0	0	0	0	0	0	3985.61	0	0	0	0	0	0	0	0	0
387	Groznenskiy rayon	Russia	Eastern Europe	1.69924e+07	3751912	5136265	Europe	80452.1	80452.1	0	0	0	0	0	0	0	0	0	17	0	0	0	0	0	0	0	0	0	4732.48	0	0	0	0	0	0	0	0	0
0	Chinchiná	Colombia	South America	4.96703e+06	-7559900	615700	South America	52894.2	0	0	0	0	0	0	52894.2	0	0	0	0	0	0	0	0	0	5	0	0	0	0	0	0	0	0	0	10578.8	0	0	0
0	Satsumasendai	Japan	Eastern Asia	2.09373e+07	11806548	3855595	Asia	67607	0	0	0	0	0	0	1438.13	66168.9	0	0	0	0	0	0	0	0	1.26729	19.7327	0	0	0	0	0	0	0	0	1134.81	3353.26	0	0
0	Balindong	Philippines	South-Eastern Asia	2.08647e+07	12376833	979643	Asia	70841	0	0	0	0	0	0	68252.4	2588.6	0	0	0	0	0	0	0	0	19.1708	1.82919	0	0	0	0	0	0	0	0	3560.22	1415.16	0	0
0	Komatsu	Japan	Eastern Asia	1.8962e+07	11952974	4381711	Asia	55771.6	0	0	0	0	0	8547.9	47223.7	0	0	0	0	0	0	0	0	2.58485	16.4152	0	0	0	0	0	0	0	0	3306.93	2876.83	0	0	0
1157	Tsuruga	Japan	Eastern Asia	1.89589e+07	11989763	4297026	Asia	64462.5	0	64462.5	0	0	0	0	0	0	0	0	0	19	0	0	0	0	0	0	0	0	0	3392.76	0	0	0	0	0	0	0	0
0	Takayama	Japan	Eastern Asia	1.29733e+07	12046962	4353962	Asia	53458.4	0	0	0	0	0	0	1576.92	51881.5	0	0	0	0	0	0	0	0	0.999975	12	0	0	0	0	0	0	0	0	1576.96	4323.45	0	0
0	Fujikawaguchiko	Japan	Eastern Asia	2.89363e+07	12244534	4280121	Asia	79266.6	0	0	0	0	0	0	0	3851.77	75414.9	0	0	0	0	0	0	0	0	1.57045	27.4295	0	0	0	0	0	0	0	0	2452.65	2749.4	0
0	Zestaponi	Georgia	Western Asia	1.29911e+07	3581962	5023500	Asia	55485.3	0	55485.3	0	0	0	0	0	0	0	0	0	13	0	0	0	0	0	0	0	0	0	4268.1	0	0	0	0	0	0	0	0
889	Perbaungan	Indonesia	South-Eastern Asia	7.94686e+06	9906500	441000	Asia	60174.8	0	0	0	60174.8	0	0	0	0	0	0	0	0	0	8	0	0	0	0	0	0	0	0	0	7521.85	0	0	0	0	0	0
1101	Tarutung	Indonesia	South-Eastern Asia	7.94658e+06	9915125	249750	Asia	69646.6	0	0	0	69646.6	0	0	0	0	0	0	0	0	0	8	0	0	0	0	0	0	0	0	0	8705.82	0	0	0	0	0	0
74	Arga Makmur	Indonesia	South-Eastern Asia	7.94683e+06	10230750	-424750	Asia	57188.9	0	0	0	0	0	57188.9	0	0	0	0	0	0	0	0	0	8	0	0	0	0	0	0	0	0	0	7148.62	0	0	0	0
597	Kure	Japan	Eastern Asia	1.19703e+07	11812583	4135417	Asia	50089.7	8253.75	0	0	0	0	0	0	0	0	0	3.32461	0	0	0	0	0	0	0	0	0	2482.62	0	0	0	0	0	0	0	0	0
0	Parang	Philippines	South-Eastern Asia	1.39093e+07	12390143	901500	Asia	52097.6	0	0	0	0	0	12140.9	39956.7	0	0	0	0	0	0	0	0	1.83179	12.1682	0	0	0	0	0	0	0	0	6627.91	3283.69	0	0	0
0	Lumba-Bayabao	Philippines	South-Eastern Asia	2.6826e+07	12395426	974130	Asia	73640.5	0	0	0	0	0	0	0	73640.5	0	0	0	0	0	0	0	0	0	27	0	0	0	0	0	0	0	0	0	2727.43	0	0
0	Datu Anggal Midtimbang	Philippines	South-Eastern Asia	8.94154e+06	12400167	867389	Asia	98400.6	0	0	5.90625	98394.7	0	0	0	0	0	0	0	0	0.2357	8.7643	0	0	0	0	0	0	0	0	25.0583	11226.8	0	0	0	0	0	0
0	Loire	France	Western Europe	1.60037e+07	325000	5452875	Europe	55622.8	10561.1	45061.7	0	0	0	0	0	0	0	0	4.30278	11.6972	0	0	0	0	0	0	0	0	2454.48	3852.35	0	0	0	0	0	0	0	0
0	Hy?ga	Japan	Eastern Asia	2.69228e+07	11878019	3926944	Asia	55570.4	0	0	55570.4	0	0	0	0	0	0	0	0	0	27	0	0	0	0	0	0	0	0	0	2058.16	0	0	0	0	0	0	0
0	Caltanissetta	Italy	Southern Europe	7.986e+06	1220375	4506625	Europe	51314.6	8.5625	51306.1	0	0	0	0	0	0	0	0	0.00735967	7.99264	0	0	0	0	0	0	0	0	1163.43	6419.16	0	0	0	0	0	0	0	0
0	?date	Japan	Eastern Asia	1.39844e+07	11906571	4820643	Asia	53621.3	0	0	0	0	0	0	53621.3	0	0	0	0	0	0	0	0	0	14	0	0	0	0	0	0	0	0	0	3830.09	0	0	0
0	Yurihonj?	Japan	Eastern Asia	1.49803e+07	11959100	4721433	Asia	60470.5	0	0	0	0	0	0	60470.5	0	0	0	0	0	0	0	0	0	15	0	0	0	0	0	0	0	0	0	4031.36	0	0	0
0	Kitakami	Japan	Eastern Asia	1.99733e+07	12060500	4711550	Asia	66274.7	0	0	0	0	6873.09	59401.6	0	0	0	0	0	0	0	0	3.67531	16.3247	0	0	0	0	0	0	0	0	1870.07	3638.76	0	0	0	0
0	?sh?	Japan	Eastern Asia	1.69766e+07	12080676	4692853	Asia	61575.9	0	0	0	0	0	377.512	61198.4	0	0	0	0	0	0	0	0	0.328672	16.6713	0	0	0	0	0	0	0	0	1148.6	3670.88	0	0	0
0	Ichinoseki	Japan	Eastern Asia	1.39801e+07	12102000	4669000	Asia	57563.2	0	0	0	0	0	0	31992.7	25570.5	0	0	0	0	0	0	0	0	6.42673	7.57327	0	0	0	0	0	0	0	0	4978.07	3376.41	0	0
0	Gotemba	Japan	Eastern Asia	1.39687e+07	12275143	4257357	Asia	51175.5	0	0	0	0	0	0	0	0	47850.6	3324.92	0	0	0	0	0	0	0	0	12.3065	1.69352	0	0	0	0	0	0	0	0	3888.25	1963.32
0	Karanganyar	Indonesia	South-Eastern Asia	9.93542e+06	11076600	-946500	Asia	53555.3	0	0	0	0	0	0	0	0	1304.45	52250.9	0	0	0	0	0	0	0	0	0.88483	9.11517	0	0	0	0	0	0	0	0	1474.23	5732.3
0	Haut Nkam	Cameroon	Middle Africa	5.96048e+06	1017500	637333	Africa	55486.5	0	0	0	55486.5	0	0	0	0	0	0	0	0	0	6	0	0	0	0	0	0	0	0	0	9247.74	0	0	0	0	0	0
875	Pasaman	Indonesia	South-Eastern Asia	4.96653e+06	9977700	34100	Asia	55827.7	0	0	0	0	0	0	0	55827.7	0	0	0	0	0	0	0	0	0	5	0	0	0	0	0	0	0	0	0	11165.5	0	0
649	Lubuk Sikaping	Indonesia	South-Eastern Asia	3.97322e+06	10039250	16750	Asia	57657.6	0	0	0	0	0	0	0	57657.6	0	0	0	0	0	0	0	0	0	4	0	0	0	0	0	0	0	0	0	14414.4	0	0
0	Pesisir Selatan	Indonesia	South-Eastern Asia	5.95988e+06	10078000	-167000	Asia	57295.4	0	0	0	0	0	57295.4	0	0	0	0	0	0	0	0	0	6	0	0	0	0	0	0	0	0	0	9549.23	0	0	0	0
0	Datu Odin Sinsuat	Philippines	South-Eastern Asia	1.49026e+07	12403633	870633	Asia	63343.1	0	0	0	63343.1	0	0	0	0	0	0	0	0	0	15	0	0	0	0	0	0	0	0	0	4222.88	0	0	0	0	0	0
0	Noshiro	Japan	Eastern Asia	1.4983e+07	11870167	4811900	Asia	51093.5	0	0	0	0	0	3375.99	47717.5	0	0	0	0	0	0	0	0	1.6158	13.3842	0	0	0	0	0	0	0	0	2089.36	3565.21	0	0	0
0	Pesawaran	Indonesia	South-Eastern Asia	8.9408e+06	10504611	-664389	Asia	55456.7	0	0	55456.7	0	0	0	0	0	0	0	0	0	9	0	0	0	0	0	0	0	0	0	6161.86	0	0	0	0	0	0	0
0	Towada	Japan	Eastern Asia	1.39855e+07	11924929	4858071	Asia	50462.2	0	0	0	0	0	0	7930.38	42531.9	0	0	0	0	0	0	0	0	3.36153	10.6385	0	0	0	0	0	0	0	0	2359.16	3997.93	0	0
0	Le Gosier	Guadeloupe	Western Europe	1.19322e+07	-6013250	1997750	Europe	52144.3	0	0	0	0	0	0	0	52144.3	0	0	0	0	0	0	0	0	0	12	0	0	0	0	0	0	0	0	0	4345.36	0	0
370	Gimpo	South Korea	Eastern Asia	9.98279e+06	10989500	4521400	Asia	54407	54407	0	0	0	0	0	0	0	0	0	10	0	0	0	0	0	0	0	0	0	5440.7	0	0	0	0	0	0	0	0	0
797	Neuwied	Germany	Western Europe	2.50314e+07	562860	5918580	Europe	52483.6	0	0	0	0	38949.6	13534	0	0	0	0	0	0	0	0	19.0468	5.95317	0	0	0	0	0	0	0	0	2044.94	2273.41	0	0	0	0
0	Allier	France	Western Europe	1.70052e+07	206735	5485500	Europe	52216.9	0	0	8045.53	44171.4	0	0	0	0	0	0	0	0	3.36181	13.6382	0	0	0	0	0	0	0	0	2393.21	3238.8	0	0	0	0	0	0
0	Datu Abdullah Sanki	Philippines	South-Eastern Asia	1.09285e+07	12422136	851955	Asia	52535.9	0	52535.9	0	0	0	0	0	0	0	0	0	11	0	0	0	0	0	0	0	0	0	4775.99	0	0	0	0	0	0	0	0
0	Hanamaki	Japan	Eastern Asia	1.39816e+07	12050357	4721714	Asia	50114.7	0	0	0	0	7462.57	42652.2	0	0	0	0	0	0	0	0	2.84955	11.1505	0	0	0	0	0	0	0	0	2618.86	3825.15	0	0	0	0
166	Blitar	Indonesia	South-Eastern Asia	1.29164e+07	11188500	-997654	Asia	55153.5	0	0	0	0	0	0	0	0	55153.5	0	0	0	0	0	0	0	0	0	13	0	0	0	0	0	0	0	0	0	4242.58	0
123	Bangkalan	Indonesia	South-Eastern Asia	1.19221e+07	11241750	-884000	Asia	50955.5	0	0	0	0	50955.5	0	0	0	0	0	0	0	0	0	11.2901	0.709896	0	0	0	0	0	0	0	0	4513.29	0	0	0	0	0

## Sheet: 1980
city_ID	Name	Country	Subregion	Area_km2	Lat	Lon	Continent	Ttl_Ppl	100to90	90to80	80to70	70to60	60to50	50to40	40to30	30to20	20to10	Pp_10km	Area100to90	Area90to80	Area80to70	Area70to60	Area60to50	Area50to40	Area40to30	Area30to20	Area20to10	Ar_10_2	Dens100to90	Dens90to80	Dens80to70	Dens70to60	Dens60to50	Dens50to40	Dens40to30	Dens30to20	Dens20to10	Dens10
869	Papeete	Fr. Polynesia	Polynesia	3.67971e+07	-14556419	-2156770	Oceania	57348.6	0	25583.1	31765.5	0	0	0	0	0	0	0	0	20.8138	16.1862	0	0	0	0	0	0	0	0	1229.14	1962.5	0	0	0	0	0	0	0
21	Ahuachapan	El Salvador	Central America	9.94077e+06	-8840600	1715700	North America	52468.9	0	0	0	0	0	0	0	0	52468.9	0	0	0	0	0	0	0	0	0	10	0	0	0	0	0	0	0	0	0	5246.89	0
226	Chinandega	Nicaragua	Central America	8.94547e+06	-8601500	1556500	North America	88809.8	0	0	0	0	0	0	0	0	88809.8	0	0	0	0	0	0	0	0	0	9	0	0	0	0	0	0	0	0	0	9867.75	0
75	Arica	Chile	South America	1.69089e+07	-6818618	-2270029	South America	94274.9	94274.9	0	0	0	0	0	0	0	0	0	17	0	0	0	0	0	0	0	0	0	5545.58	0	0	0	0	0	0	0	0	0
341	Fort-de-France	Martinique	Western Europe	4.17544e+07	-5997357	1799619	Europe	128679	0	0	0	0	0	0	0	128679	0.428152	0	0	0	0	0	0	0	0	41.9848	0.0152241	0	0	0	0	0	0	0	0	3064.89	28.1232	0
944	Reykjavik	Iceland	Northern Europe	4.31789e+07	-1301221	7262360	Europe	80778.3	0	0	0	0	0	0	0	69874.3	10904.1	0	0	0	0	0	0	0	0	37.6045	5.39547	0	0	0	0	0	0	0	0	1858.13	2020.97	0
3	Aachen	Germany	Western Europe	5.10681e+07	459559	5954520	Europe	200616	3425.14	197065	126.277	0	0	0	0	0	0	0	1.37912	49.5533	0.0675474	0	0	0	0	0	0	0	2483.58	3976.82	1869.45	0	0	0	0	0	0	0
656	Luxembourg	Luxembourg	Western Europe	2.20235e+07	468773	5832864	Europe	70631.7	0	57445.9	13185.8	0	0	0	0	0	0	0	0	13.9069	8.09314	0	0	0	0	0	0	0	0	4130.76	1629.25	0	0	0	0	0	0	0
628	Limbe	Cameroon	Middle Africa	1.39072e+07	921214	496357	Africa	55015.4	0	0	0	0	0	0	0	51628	3387.39	0	0	0	0	0	0	0	0	12.3722	1.62777	0	0	0	0	0	0	0	0	4172.89	2080.99	0
395	Gyumri	Armenia	Western Asia	2.69732e+07	3696981	4877574	Asia	190381	0	0	0	0	0	166649	23731.3	0	0	0	0	0	0	0	0	20.1014	6.89857	0	0	0	0	0	0	0	0	8290.42	3440.03	0	0	0
780	Nakhchivan	Azerbaijan	Western Asia	1.69769e+07	3883735	4700441	Asia	56885.5	0	0	0	56885.5	0	0	0	0	0	0	0	0	0	17	0	0	0	0	0	0	0	0	0	3346.2	0	0	0	0	0	0
836	Otaru	Japan	Eastern Asia	3.29857e+07	11610288	5143106	Asia	129036	0	0	0	0	0	129036	0	0	0	0	0	0	0	0	0	33	0	0	0	0	0	0	0	0	0	3910.18	0	0	0	0
1053	Sonsonate	El Salvador	Central America	1.49108e+07	-8833100	1690500	North America	89845	0	0	0	0	0	0	0	0	89845	0	0	0	0	0	0	0	0	0	15	0	0	0	0	0	0	0	0	0	5989.67	0
622	León	Nicaragua	Central America	1.49088e+07	-8580500	1533167	North America	131603	0	0	0	0	0	0	0	33408.4	98195	0	0	0	0	0	0	0	0	3.91191	11.0881	0	0	0	0	0	0	0	0	8540.18	8855.9	0
721	Mendoza	Argentina	South America	1.41608e+08	-6189577	-3982049	South America	522673	7773.84	0	0	0	0	0	0	0	0	0	4.72175	0	0	0	0	0	0	0	0	0	1646.39	0	0	0	0	0	0	0	0	0
494	João Teves	Cabo Verde	Western Africa	1.59073e+07	-2314500	1854125	Africa	76128.6	0	69270.7	6857.88	0	0	0	0	0	0	0	0	12.5879	3.41207	0	0	0	0	0	0	0	0	5502.94	2009.89	0	0	0	0	0	0	0
1237	Yerevan	Armenia	Western Asia	1.73802e+08	3773080	4808598	Asia	1.11649e+06	0	0	0	0	0	867633	248862	0	0	0	0	0	0	0	0	143.457	30.5429	0	0	0	0	0	0	0	0	6048.03	8147.94	0	0	0
340	Fomboni	Comoros	Eastern Africa	8.94517e+06	4321722	-1514167	Africa	86786.3	0	0	82805.2	3981.02	0	0	0	0	0	0	0	0	5.79901	3.20099	0	0	0	0	0	0	0	0	14279.2	1243.68	0	0	0	0	0	0
1039	Sigli	Indonesia	South-Eastern Asia	1.98684e+07	9590700	664400	Asia	90374.6	0	0	0	90374.6	0	0	0	0	0	0	0	0	0	20	0	0	0	0	0	0	0	0	0	4518.73	0	0	0	0	0	0
1018	Seoul	South Korea	Eastern Asia	1.04816e+09	11019060	4506635	Asia	12235492	4.46922e+06	3091886	580080	53457.6	0	0	0	0	0	0	285.137	180.713	45.0995	8.7549	0	0	0	0	0	0	15673.9	17109.4	12862.2	6106.03	0	0	0	0	0	0
1007	Sapporo	Japan	Eastern Asia	3.0286e+08	11654437	5129579	Asia	1.69265e+06	0	0	0	0	85736.1	1.1186e+06	488315	0	0	0	0	0	0	0	29.0534	174.739	99.2077	0	0	0	0	0	0	0	2950.99	6401.54	4922.15	0	0	0
1192	Vancouver	Canada	Northern America	4.53442e+08	-9450930	5791498	North America	868186	0	62199.4	335090	420001	50896.1	0	0	0	0	0	0	32.061	202.437	190.218	28.2838	0	0	0	0	0	0	1940.03	1655.28	2208	1799.48	0	0	0	0	0
674	Managua	Nicaragua	Central America	1.04359e+08	-8524605	1495900	North America	516382	0	0	0	0	0	0	0	0	171221	345161	0	0	0	0	0	0	0	0	36.3405	68.6595	0	0	0	0	0	0	0	0	4711.58	5027.14
979	San José	Costa Rica	Central America	2.42463e+08	-8348705	1226480	North America	759702	0	0	0	0	0	0	1209.31	517735	240757	0	0	0	0	0	0	0	0.762757	134.058	109.179	0	0	0	0	0	0	0	1585.45	3862.03	2205.15	0
997	Santa Cruz de Tenerife	Spain	Southern Europe	5.28056e+07	-1507557	3462160	Europe	268817	0	0	0	0	0	173188	95629.6	0	0	0	0	0	0	0	0	24.7011	28.2989	0	0	0	0	0	0	0	0	7011.34	3379.27	0	0	0
1107	Tbilisi	Georgia	Western Asia	1.32896e+08	3745598	4980440	Asia	970922	812914	55020.4	0	0	0	0	0	0	0	0	100.633	9.46336	0	0	0	0	0	0	0	0	8078.01	5814.04	0	0	0	0	0	0	0	0
359	Ganja	Azerbaijan	Western Asia	4.39552e+07	3911932	4865864	Asia	263158	113853	149305	0	0	0	0	0	0	0	0	21.9965	22.0035	0	0	0	0	0	0	0	0	5175.98	6785.49	0	0	0	0	0	0	0	0
429	Hodeidah	Yemen	Western Asia	2.38602e+07	4216250	1821875	Asia	162961	828.328	162132	0	0	0	0	0	0	0	0	0.333358	23.6666	0	0	0	0	0	0	0	0	2484.8	6850.67	0	0	0	0	0	0	0	0
302	Djibouti	Djibouti	Eastern Africa	2.68337e+07	4269648	1428574	Africa	106489	0	0	106489	0	0	0	0	0	0	0	0	0	27	0	0	0	0	0	0	0	0	0	3944.05	0	0	0	0	0	0	0
961	Saint-Denis	Réunion	Western Europe	1.99e+07	5330450	-2561050	Europe	99060.1	0	0	0	0	0	99060.1	0	0	0	0	0	0	0	0	0.18945	19.8106	0	0	0	0	0	0	0	0	0	5000.37	0	0	0	0
726	Meulaboh	Indonesia	South-Eastern Asia	1.49006e+07	9618300	512567	Asia	102402	0	102402	0	0	0	0	0	0	0	0	0	15	0	0	0	0	0	0	0	0	0	6826.78	0	0	0	0	0	0	0	0
436	Hsinchu	Taiwan	Eastern Asia	8.36348e+07	11420381	3031464	Asia	384996	0	0	207949	177048	0	0	0	0	0	0	0	0	41.1607	42.8393	0	0	0	0	0	0	0	0	5052.11	4132.84	0	0	0	0	0	0
524	Karatsu	Japan	Eastern Asia	2.69287e+07	11643315	4045130	Asia	74838.7	0	64180.2	10658.4	0	0	0	0	0	0	0	0	22.8062	4.19382	0	0	0	0	0	0	0	0	2814.16	2541.46	0	0	0	0	0	0	0
995	Santa Ana	El Salvador	Central America	2.48521e+07	-8810220	1722500	North America	194239	0	0	0	0	0	0	0	0	160880	33358.6	0	0	0	0	0	0	0	0	20.496	4.504	0	0	0	0	0	0	0	0	7849.33	7406.44
987	San Pedro Sula	Honduras	Central America	4.57358e+07	-8621783	1908087	North America	226099	0	0	0	100015	126084	0	0	0	0	0	0	0	0	21.4173	24.5827	0	0	0	0	0	0	0	0	4669.84	5128.97	0	0	0	0	0
335	Esteli	Nicaragua	Central America	1.09339e+07	-8515500	1613045	North America	63234.4	0	0	63234.4	0	0	0	0	0	0	0	0	0	11	0	0	0	0	0	0	0	0	0	5748.58	0	0	0	0	0	0	0
203	Cartago	Costa Rica	Central America	2.88172e+07	-8334293	1216603	North America	98886.5	0	0	0	0	0	0	0	0	98886.5	0	0	0	0	0	0	0	0	0	29	0	0	0	0	0	0	0	0	0	3409.88	0
878	Pasto	Colombia	South America	2.38395e+07	-7743958	149708	South America	170387	0	0	0	0	0	0	0	0	103639	66748	0	0	0	0	0	0	0	0	13.7671	10.2329	0	0	0	0	0	0	0	0	7528.02	6522.9
557	Kigali	Rwanda	Eastern Africa	4.46995e+07	3013567	-241967	Africa	98766.6	0	9290.4	89476.2	0	0	0	0	0	0	0	0	8.23592	36.7641	0	0	0	0	0	0	0	0	1128.03	2433.8	0	0	0	0	0	0	0
162	Bireuen	Indonesia	South-Eastern Asia	1.68881e+07	9667265	642735	Asia	125965	0	0	0	0	37751.7	88213.8	0	0	0	0	0	0	0	0	6.24641	10.7536	0	0	0	0	0	0	0	0	6043.74	8203.2	0	0	0	0
1150	Toufen	Taiwan	Eastern Asia	3.08645e+07	11418565	3015145	Asia	140558	9105.48	131452	0	0	0	0	0	0	0	0	4.72632	26.2737	0	0	0	0	0	0	0	0	1926.55	5003.19	0	0	0	0	0	0	0	0
1009	Sasebo	Japan	Eastern Asia	3.19135e+07	11645219	4012188	Asia	93855.7	0	0	46293.5	47562.2	0	0	0	0	0	0	0	0	14.3213	17.6787	0	0	0	0	0	0	0	0	3232.49	2690.37	0	0	0	0	0	0
931	Quetzaltenango	Guatemala	Central America	2.38603e+07	-8982375	1827750	North America	58088.8	0	0	0	0	0	0	0	0	0	58088.8	0	0	0	0	0	0	0	0	0	24	0	0	0	0	0	0	0	0	0	2420.37
690	Masaya	Nicaragua	Central America	1.29204e+07	-8512192	1476577	North America	77374.3	0	0	0	0	0	0	0	0	1020.27	76354	0	0	0	0	0	0	0	0	0.920193	12.0798	0	0	0	0	0	0	0	0	1108.75	6320.8
612	Las Palmas de Gran Canaria	Spain	Southern Europe	4.08469e+07	-1431207	3421988	Europe	298465	0	0	0	0	0	0	0	71448.1	227017	0	0	0	0	0	0	0	0	12.6341	28.3659	0	0	0	0	0	0	0	0	5655.17	8003.17	0
594	Kumba	Cameroon	Middle Africa	2.18546e+07	944636	572909	Africa	120058	0	0	0	0	0	0	120055	3.35161	0	0	0	0	0	0	0	0	21.9172	0.0827957	0	0	0	0	0	0	0	0	5477.66	40.4805	0	0
1090	Takengon	Indonesia	South-Eastern Asia	1.19207e+07	9686750	572167	Asia	80544.7	0	0	0	0	0	0	0	0	80544.7	0	0	0	0	0	0	0	0	0	12	0	0	0	0	0	0	0	0	0	6712.06	0
729	Miaoli	Taiwan	Eastern Asia	1.99121e+07	11419900	3000250	Asia	102187	36936.8	0	0	0	0	0	0	0	0	0	6.6581	0	0	0	0	0	0	0	0	0	5547.64	0	0	0	0	0	0	0	0	0
91	Asahikawa	Japan	Eastern Asia	7.29783e+07	11651747	5207240	Asia	262810	0	0	0	0	0	128681	134129	0	0	0	0	0	0	0	0	39.1498	33.8502	0	0	0	0	0	0	0	0	3286.9	3962.41	0	0	0
312	Douala	Cameroon	Middle Africa	1.43046e+08	973979	500986	Africa	542484	0	0	58373.4	419679	64431.7	0	0	0	0	0	0	0	20.6733	97.8809	25.4458	0	0	0	0	0	0	0	2823.61	4287.65	2532.11	0	0	0	0	0
99	Athens	Greece	Southern Europe	3.91359e+08	2052339	4563658	Europe	3181834	0	0	0	596214	1.66582e+06	919796	0	0	0	0	0	0	0	125.8	141.299	124.901	0	0	0	0	0	0	0	4739.39	11789.3	7364.2	0	0	0	0
624	Lhokseumawe	Indonesia	South-Eastern Asia	1.6888e+07	9711147	640500	Asia	60865.9	0	0	0	0	60865.9	0	0	0	0	0	0	0	0	0.483587	16.5164	0	0	0	0	0	0	0	0	0	3685.18	0	0	0	0	0
351	Fukuoka	Japan	Eastern Asia	4.01949e+08	11672091	4062676	Asia	1.90455e+06	953618	873952	34544.9	0	0	0	0	0	0	0	194.277	167.869	15.6792	0	0	0	0	0	0	0	4908.55	5206.16	2203.23	0	0	0	0	0	0	0
988	San Salvador	El Salvador	Central America	1.67001e+08	-8780524	1687214	North America	1123734	0	0	0	0	0	0	0	0	602234	521500	0	0	0	0	0	0	0	0	86.3167	81.6833	0	0	0	0	0	0	0	0	6977.03	6384.41
384	Granada	Nicaragua	Central America	1.19265e+07	-8499250	1471250	North America	77392.6	0	0	0	0	0	0	0	0	0	77392.6	0	0	0	0	0	0	0	0	0	12	0	0	0	0	0	0	0	0	0	6449.39
904	Popayán	Colombia	South America	1.88733e+07	-7673711	302500	South America	100819	0	0	0	0	0	0	11992.9	88826	0	0	0	0	0	0	0	0	2.62049	16.3795	0	0	0	0	0	0	0	0	4576.6	5423	0	0
1154	Trier	Germany	Western Europe	1.60176e+07	506875	5847125	Europe	62392.9	0	0	0	0	15923.9	46469	0	0	0	0	0	0	0	0	6.31787	9.68213	0	0	0	0	0	0	0	0	2520.45	4799.46	0	0	0	0
807	Nkongsamba	Cameroon	Middle Africa	1.49011e+07	993567	612833	Africa	109951	0	0	0	0	0	0	109951	0	0	0	0	0	0	0	0	0	15	0	0	0	0	0	0	0	0	0	7330.03	0	0	0
1252	Zalingei	Sudan	Northern Africa	1.19276e+07	2315333	1591250	Africa	80545.3	0	80545.3	0	0	0	0	0	0	0	0	0	12	0	0	0	0	0	0	0	0	0	6712.11	0	0	0	0	0	0	0	0
565	Kisumu	Kenya	Eastern Africa	2.88059e+07	3484500	-12810	Africa	148152	0	0	0	0	0	139662	8490.72	0	0	0	0	0	0	0	0	25.3178	3.68217	0	0	0	0	0	0	0	0	5516.34	2305.9	0	0	0
567	Kitakyushu	Japan	Eastern Asia	3.37141e+08	11683178	4097621	Asia	1.10391e+06	83421.8	661369	349850	9265.38	0	0	0	0	0	0	27.7581	194.196	110.514	5.53237	0	0	0	0	0	0	3005.31	3405.69	3165.66	1674.76	0	0	0	0	0	0
406	Hamilton	New Zealand	Australia and New Zealand	5.79023e+07	15179138	-4539655	Oceania	61591.8	4293.62	0	0	0	0	0	0	0	0	0	4.48991	0	0	0	0	0	0	0	0	0	956.283	0	0	0	0	0	0	0	0	0
1085	Taipei	Taiwan	Eastern Asia	5.49622e+08	11455475	3057797	Asia	4.65109e+06	0	0	0	0	0	93437.5	254193	1.36811e+06	2.59323e+06	342113	0	0	0	0	0	26.332	83.4405	152.514	251.82	37.8935	0	0	0	0	0	3548.43	3046.4	8970.36	10298	9028.26
825	Omura	Japan	Eastern Asia	3.49036e+07	11684671	3983871	Asia	96747.8	0	0	0	0	0	1649.99	95097.8	0	0	0	0	0	0	0	0	2.88563	32.1144	0	0	0	0	0	0	0	0	571.796	2961.22	0	0	0
102	Auckland	New Zealand	Australia and New Zealand	5.21017e+08	15249636	-4439519	Oceania	653404	0	0	0	0	0	0	0	30198.1	288925	334281	0	0	0	0	0	0	0	30.4446	227.974	263.581	0	0	0	0	0	0	0	991.905	1267.36	1268.23
321	El Progreso	Honduras	Central America	1.29252e+07	-8603346	1895115	North America	69614.5	0	0	0	0	68902.6	711.87	0	0	0	0	0	0	0	0	12.6965	0.303451	0	0	0	0	0	0	0	0	5426.88	2345.92	0	0	0	0
694	Matagalpa	Nicaragua	Central America	7.95177e+06	-8475750	1593000	North America	63124.7	0	63124.7	0	0	0	0	0	0	0	0	0	8	0	0	0	0	0	0	0	0	0	7890.58	0	0	0	0	0	0	0	0
199	Cali	Colombia	South America	1.4205e+08	-7660416	424493	South America	1.2962e+06	0	361907	934298	0	0	0	0	0	0	0	0	42.4553	100.545	0	0	0	0	0	0	0	0	8524.41	9292.37	0	0	0	0	0	0	0
255	Cologne	Germany	Western Europe	2.4634e+08	524683	5975341	Europe	909824	320050	568151	0	0	0	0	0	0	0	0	125.018	115.249	0	0	0	0	0	0	0	0	2560.04	4929.76	0	0	0	0	0	0	0	0
314	Dschang	Cameroon	Middle Africa	1.19211e+07	1005417	673750	Africa	56937.8	0	56937.8	0	0	0	0	0	0	0	0	0	12	0	0	0	0	0	0	0	0	0	4744.82	0	0	0	0	0	0	0	0
234	Chuncheon	South Korea	Eastern Asia	2.29618e+07	11053152	4550891	Asia	185429	0	0	0	173989	11439.5	0	0	0	0	0	0	0	0	18.5949	4.40513	0	0	0	0	0	0	0	0	9356.83	2596.86	0	0	0	0	0
775	Nagasaki	Japan	Eastern Asia	8.17716e+07	11688598	3967159	Asia	328039	0	0	0	0	0	222629	105410	0	0	0	0	0	0	0	0	59.8845	22.1155	0	0	0	0	0	0	0	0	3717.65	4766.32	0	0	0
232	Choluteca	Honduras	Central America	1.39161e+07	-8592500	1639000	North America	76048	0	0	0	0	3859.34	72188.6	0	0	0	0	0	0	0	0	1.46964	12.5304	0	0	0	0	0	0	0	0	2626.05	5761.1	0	0	0	0
532	Kebkabiya	Sudan	Northern Africa	1.19286e+07	2372333	1681583	Africa	150341	0	53970	96371.5	0	0	0	0	0	0	0	0	4.96897	7.03103	0	0	0	0	0	0	0	0	10861.4	13706.6	0	0	0	0	0	0	0
959	Saga	Japan	Eastern Asia	2.29383e+07	11687500	4022804	Asia	54058.3	0	0	0	0	54058.3	0	0	0	0	0	0	0	0	0	23	0	0	0	0	0	0	0	0	0	2350.36	0	0	0	0	0
727	Mexicali	Mexico	Central America	1.08693e+08	-10403170	3949179	North America	230184	0	0	0	0	0	0	48601.8	162656	18927	0	0	0	0	0	0	0	24.3754	77.8431	6.78146	0	0	0	0	0	0	0	1993.89	2089.53	2791	0
1113	Tegucigalpa	Honduras	Central America	8.74802e+07	-8576114	1734330	North America	514684	505580	747.341	0	0	0	0	0	0	0	0	85.5909	0.269999	0	0	0	0	0	0	0	0	5906.93	2767.94	0	0	0	0	0	0	0	0
177	Bonn	Germany	Western Europe	2.33311e+08	534307	5954852	Europe	604640	0	56914.6	225723	308440	13562.2	0	0	0	0	0	0	16.3621	105.618	106.198	4.822	0	0	0	0	0	0	3478.44	2137.16	2904.4	2812.56	0	0	0	0	0
120	Bamenda	Cameroon	Middle Africa	3.47707e+07	1014443	736243	Africa	140254	0	0	0	0	74550.1	65703.5	0	0	0	0	0	0	0	0	17.9411	17.0589	0	0	0	0	0	0	0	0	4155.28	3851.56	0	0	0	0
527	Kas	Sudan	Northern Africa	1.09332e+07	2398682	1541591	Africa	77212.2	0	0	0	0	19613.4	57598.7	0	0	0	0	0	0	0	0	3.39458	7.60542	0	0	0	0	0	0	0	0	5777.87	7573.38	0	0	0	0
863	Pangkalan Brandan	Indonesia	South-Eastern Asia	1.29138e+07	9835423	496346	Asia	110491	43436.1	67054.7	0	0	0	0	0	0	0	0	4.70113	8.29887	0	0	0	0	0	0	0	0	9239.49	8079.98	0	0	0	0	0	0	0	0
457	Iizuka	Japan	Eastern Asia	2.79272e+07	11690786	4066893	Asia	70922.3	0	0	70922.3	0	0	0	0	0	0	0	0	0	28	0	0	0	0	0	0	0	0	0	2532.94	0	0	0	0	0	0	0
982	San Luis Río Colorado	Mexico	Central America	3.29058e+07	-10352561	3929409	North America	63860.7	0	0	0	0	49196.2	14664.5	0	0	0	0	0	0	0	0	25.506	7.49401	0	0	0	0	0	0	0	0	1928.81	1956.83	0	0	0	0
983	San Miguel	El Salvador	Central America	1.98806e+07	-8686550	1660900	North America	129975	0	0	0	0	0	0	0	0	45843.1	84131.8	0	0	0	0	0	0	0	0	7.21813	12.7819	0	0	0	0	0	0	0	0	6351.1	6582.12
680	Manisa	Turkey	Western Asia	1.99701e+07	2356000	4634200	Asia	101527	93952.9	0	0	0	0	0	0	0	0	0	15.6406	0	0	0	0	0	0	0	0	0	6006.99	0	0	0	0	0	0	0	0	0
782	Nakuru	Kenya	Eastern Africa	1.68862e+07	3614735	-36735	Africa	51282.9	0	0	0	0	0	0	0	0	44731.8	6551.07	0	0	0	0	0	0	0	0	13.2633	3.73668	0	0	0	0	0	0	0	0	3372.6	1753.18
1038	Sidiangkat	Indonesia	South-Eastern Asia	9.93336e+06	9846400	339700	Asia	84150.4	0	0	0	0	0	84150.4	0	0	0	0	0	0	0	0	0	10	0	0	0	0	0	0	0	0	0	8415.04	0	0	0	0
1148	Tosu	Japan	Eastern Asia	2.69283e+07	11697981	4037574	Asia	79776.1	0	0	73067	6709.1	0	0	0	0	0	0	0	0	23.3052	3.69481	0	0	0	0	0	0	0	0	3135.22	1815.82	0	0	0	0	0	0
708	Mbouda	Cameroon	Middle Africa	1.19212e+07	1024750	694917	Africa	62419.5	0	0	62419.5	0	0	0	0	0	0	0	0	0	12	0	0	0	0	0	0	0	0	0	5201.62	0	0	0	0	0	0	0
710	Medan	Indonesia	South-Eastern Asia	4.1125e+08	9876034	444587	Asia	2.29898e+06	0	0	0	24064.5	215570	1.58517e+06	474179	0	0	0	0	0	0	8.84209	56.7134	246.583	101.861	0	0	0	0	0	0	2721.59	3801.04	6428.52	4655.14	0	0	0
468	Isahaya	Japan	Eastern Asia	3.39058e+07	11699059	3974324	Asia	119153	0	0	0	0	0	0	11998.2	107155	0	0	0	0	0	0	0	0	3.31094	30.6891	0	0	0	0	0	0	0	0	3623.82	3491.64	0	0
109	Bafoussam	Cameroon	Middle Africa	3.47699e+07	1040671	677700	Africa	152809	0	152809	0	0	0	0	0	0	0	0	0	35	0	0	0	0	0	0	0	0	0	4365.97	0	0	0	0	0	0	0	0
778	Nairobi	Kenya	Eastern Africa	1.90716e+08	3689323	-158240	Africa	796861	0	0	0	255325	376150	129462	35923.4	0	0	0	0	0	0	49.8095	84.3092	38.9831	18.8981	0	0	0	0	0	0	5126.03	4461.56	3320.96	1900.9	0	0	0
1056	Stabat	Indonesia	South-Eastern Asia	1.49004e+07	9854700	463500	Asia	122992	0	0	0	0	122992	0	0	0	0	0	0	0	0	0	15	0	0	0	0	0	0	0	0	0	8199.46	0	0	0	0	0
824	Olongapo	Philippines	South-Eastern Asia	2.18719e+07	11806091	1826955	Asia	167866	0	0	0	0	0	0	164015	3850.55	0	0	0	0	0	0	0	0	20.7662	1.23376	0	0	0	0	0	0	0	0	7898.15	3121	0	0
856	Palmira	Colombia	South America	1.98671e+07	-7637900	436800	South America	135880	0	0	135880	0	0	0	0	0	0	0	0	0	20	0	0	0	0	0	0	0	0	0	6794.02	0	0	0	0	0	0	0
627	Liège	Belgium	Western Europe	1.09142e+08	419555	5939784	Europe	332297	10704.5	0	0	0	0	0	0	0	0	0	4.27098	0	0	0	0	0	0	0	0	0	2506.33	0	0	0	0	0	0	0	0	0
504	Kabanjahe	Indonesia	South-Eastern Asia	9.93345e+06	9862500	383900	Asia	65315.1	0	0	0	0	0	0	0	0	65315.1	0	0	0	0	0	0	0	0	0	10	0	0	0	0	0	0	0	0	0	6531.51	0
599	Kurume	Japan	Eastern Asia	3.59038e+07	11704639	4028500	Asia	157498	0	0	0	157498	0	0	0	0	0	0	0	0	0	36	0	0	0	0	0	0	0	0	0	4374.95	0	0	0	0	0	0
1099	Tarlac City	Philippines	South-Eastern Asia	2.88333e+07	11813672	1904569	Asia	98402.6	0	0	0	0	126.539	98276	0	0	0	0	0	0	0	0	0.373377	28.6266	0	0	0	0	0	0	0	0	338.904	3433.03	0	0	0	0
332	Escuintla	Guatemala	Central America	1.39176e+07	-8923429	1761286	North America	54450.8	0	0	0	0	0	0	0	5520.93	48929.9	0	0	0	0	0	0	0	0	2.03125	11.9687	0	0	0	0	0	0	0	0	2717.99	4088.14	0
595	Kumbo	Cameroon	Middle Africa	1.19215e+07	1066167	766833	Africa	67230.4	0	0	0	0	0	0	0	52802	14428.3	0	0	0	0	0	0	0	0	6.80266	5.19734	0	0	0	0	0	0	0	0	7761.96	2776.1	0
1077	Tabora	Tanzania	Eastern Africa	2.38418e+07	3280667	-620167	Africa	71629.7	59514.2	0	0	0	0	0	0	0	0	0	19.0516	0	0	0	0	0	0	0	0	0	3123.84	0	0	0	0	0	0	0	0	0
58	Antananarivo	Madagascar	Eastern Africa	8.25601e+07	4604392	-2318018	Africa	388621	243018	145603	0	0	0	0	0	0	0	0	41.7341	41.2659	0	0	0	0	0	0	0	0	5823.02	3528.4	0	0	0	0	0	0	0	0
648	Lubuk Pakam	Indonesia	South-Eastern Asia	1.49004e+07	9897633	440033	Asia	57960.2	0	0	0	0	57960.2	0	0	0	0	0	0	0	0	0	15	0	0	0	0	0	0	0	0	0	3864.01	0	0	0	0	0
767	Muroran	Japan	Eastern Asia	6.89563e+07	11709239	5049630	Asia	138346	0	0	0	0	0	0	0	70955.5	67390.6	0	0	0	0	0	0	0	0	45.2151	23.7849	0	0	0	0	0	0	0	0	1569.29	2833.33	0
57	Angeles	Philippines	South-Eastern Asia	7.05893e+07	11826092	1865077	Asia	263185	0	0	0	0	0	0	85283	177902	0	0	0	0	0	0	0	0	16.5095	54.4905	0	0	0	0	0	0	0	0	5165.69	3264.83	0	0
932	Quevedo	Ecuador	South America	1.98662e+07	-7963400	-126700	South America	76995.8	0	0	0	76995.8	0	0	0	0	0	0	0	0	0	20	0	0	0	0	0	0	0	0	0	3849.79	0	0	0	0	0	0
1165	Tuluá	Colombia	South America	1.39072e+07	-7624929	505143	South America	106220	40122.9	0	0	0	0	0	0	0	0	0	5.44523	0	0	0	0	0	0	0	0	0	7368.46	0	0	0	0	0	0	0	0	0
342	Foumban	Cameroon	Middle Africa	1.68884e+07	1088500	707853	Africa	114481	0	0	114417	64.1599	0	0	0	0	0	0	0	0	16.9457	0.0542873	0	0	0	0	0	0	0	0	6751.96	1181.86	0	0	0	0	0	0
1035	Sibolga	Indonesia	South-Eastern Asia	1.39064e+07	9898000	214143	Asia	58917.6	58917.6	0	0	0	0	0	0	0	0	0	14	0	0	0	0	0	0	0	0	0	4208.4	0	0	0	0	0	0	0	0	0
1239	Yilan City	Taiwan	Eastern Asia	2.19041e+07	11495909	3023727	Asia	120926	0	0	0	0	0	0	0	120175	750.233	0	0	0	0	0	0	0	0	20.6742	1.32583	0	0	0	0	0	0	0	0	5812.83	565.859	0
389	Guatemala City	Guatemala	Central America	3.07193e+08	-8893034	1797636	North America	1257612	0	0	0	0	0	0	335679	553131	362120	6682.24	0	0	0	0	0	0	74.699	148.064	83.8936	2.34312	0	0	0	0	0	0	4493.75	3735.75	4316.42	2851.85
654	Luodong	Taiwan	Eastern Asia	2.09082e+07	11501881	3014595	Asia	109314	0	0	0	0	0	0	0	109314	0	0	0	0	0	0	0	0	0.00192163	20.9981	0	0	0	0	0	0	0	0	0	5205.93	0	0
203	Cartago	Colombia	South America	9.93397e+06	-7592100	586500	South America	80585.1	0	0	0	77613.7	2971.39	0	0	0	0	0	0	0	0	9.0458	0.954199	0	0	0	0	0	0	0	0	8580.08	3114.01	0	0	0	0	0
439	Hualien	Taiwan	Eastern Asia	4.08157e+07	11525720	2930451	Asia	141275	10307.9	0	0	0	0	0	0	0	0	0	4.56959	0	0	0	0	0	0	0	0	0	2255.75	0	0	0	0	0	0	0	0	0
1143	Tomakomai	Japan	Eastern Asia	5.29701e+07	11724425	5081972	Asia	118295	0	0	0	0	0	0	0	42720.7	75574.8	0	0	0	0	0	0	0	0	23.8278	29.1722	0	0	0	0	0	0	0	0	1792.89	2590.64	0
890	Pereira	Colombia	South America	4.27162e+07	-7570174	595221	South America	264686	0	0	0	0	0	38896.2	225790	0	0	0	0	0	0	0	0	9.27898	33.721	0	0	0	0	0	0	0	0	4191.86	6695.83	0	0	0
5	Abha	Saudi Arabia	Western Asia	2.58598e+07	4127615	2238077	Asia	121200	121200	0	0	0	0	0	0	0	0	0	26	0	0	0	0	0	0	0	0	0	4661.53	0	0	0	0	0	0	0	0	0
145	Bayt al Faqih	Yemen	Western Asia	5.96485e+06	4256000	1787500	Asia	62381	0	62381	0	0	0	0	0	0	0	0	0	6	0	0	0	0	0	0	0	0	0	10396.8	0	0	0	0	0	0	0	0
826	Omuta	Japan	Eastern Asia	6.78141e+07	11721588	3994868	Asia	157397	0	0	0	0	0	0	109200	48196.8	0	0	0	0	0	0	0	0	42.6025	25.3975	0	0	0	0	0	0	0	0	2563.23	1897.7	0	0
679	Manila	Philippines	South-Eastern Asia	1292397469	11882315	1798362	Asia	10016259	0	63305	1456467	4031404	2.83878e+06	1.07391e+06	307642	172624	72133.2	0	0	19	215.513	296.63	322.955	275.506	85.713	52.6508	32.0328	0	0	3331.84	6758.15	13590.7	8790.01	3897.95	3589.21	3278.66	2251.86	0
947	Riobamba	Ecuador	South America	2.38396e+07	-7880292	-206125	South America	95182.9	0	0	0	0	0	0	0	0	95182.9	0	0	0	0	0	0	0	0	0	24	0	0	0	0	0	0	0	0	0	3965.96	0
1005	Santiago	Chile	South America	5.32593e+08	-6327047	-4048800	South America	3378886	9341.25	1142842	1.88562e+06	341088	0	0	0	0	0	0	2.43272	172.372	274.262	84.9331	0	0	0	0	0	0	3839.83	6630.09	6875.23	4015.95	0	0	0	0	0	0
576	Koblenz	Germany	Western Europe	3.50434e+07	574300	5911186	Europe	100733	0	0	0	5000.93	95732.2	0	0	0	0	0	0	0	0	1.73431	33.2657	0	0	0	0	0	0	0	0	2883.53	2877.81	0	0	0	0	0
707	Mbeya	Tanzania	Eastern Africa	3.37832e+07	3327706	-1099912	Africa	76273.2	0	0	0	0	0	0	0	0	76273.2	0	0	0	0	0	0	0	0	0	34	0	0	0	0	0	0	0	0	0	2243.33	0
887	Pematang Siantar	Indonesia	South-Eastern Asia	4.0727e+07	9921963	366256	Asia	359381	0	0	0	0	23942.9	335438	0	0	0	0	0	0	0	0	7.06143	33.9386	0	0	0	0	0	0	0	0	3390.66	9883.68	0	0	0	0
477	Izumo	Japan	Eastern Asia	3.29266e+07	11722894	4265015	Asia	101958	0	0	0	0	0	0	2896.31	99062.1	0	0	0	0	0	0	0	0	2.18947	30.8105	0	0	0	0	0	0	0	0	1322.84	3215.2	0	0
51	Ambato	Ecuador	South America	3.57592e+07	-7878750	-155194	South America	100005	0	0	0	0	0	0	70062.1	29942.9	0	0	0	0	0	0	0	0	21.9599	14.0401	0	0	0	0	0	0	0	0	3190.46	2132.67	0	0
1109	Tebing Tinggi	Indonesia	South-Eastern Asia	2.88072e+07	9927603	412672	Asia	154285	0	0	152260	2025.09	0	0	0	0	0	0	0	0	27.8546	1.14543	0	0	0	0	0	0	0	0	5466.25	1767.98	0	0	0	0	0	0
430	Hofu	Japan	Eastern Asia	3.8902e+07	11735321	4113115	Asia	111857	0	0	0	0	25422.7	86434	0	0	0	0	0	0	0	0	13.37	25.63	0	0	0	0	0	0	0	0	1901.47	3372.37	0	0	0	0
18	Agadez	Niger	Western Africa	1.39222e+07	779000	2086714	Africa	79926.1	79926.1	0	0	0	0	0	0	0	0	0	14	0	0	0	0	0	0	0	0	0	5709.01	0	0	0	0	0	0	0	0	0
958	Sabya	Saudi Arabia	Western Asia	9.94463e+06	4154800	2108700	Asia	50182.9	0	0	0	0	0	0	0	50182.9	0	0	0	0	0	0	0	0	0	10	0	0	0	0	0	0	0	0	0	5018.29	0	0
844	Padang Sidempuan	Indonesia	South-Eastern Asia	1.8873e+07	9947763	170974	Asia	115016	0	111688	3327.9	0	0	0	0	0	0	0	0	17.6661	1.33393	0	0	0	0	0	0	0	0	6322.16	2494.8	0	0	0	0	0	0	0
698	Matsue	Japan	Eastern Asia	2.79383e+07	11742000	4276107	Asia	54846.2	0	0	0	0	54846.2	0	0	0	0	0	0	0	0	0	28	0	0	0	0	0	0	0	0	0	1958.79	0	0	0	0	0
935	Quito	Ecuador	South America	2.00648e+08	-7866604	-21059	South America	805050	0	0	0	0	0	0	0	0	771721	33328.8	0	0	0	0	0	0	0	0	188.714	13.2857	0	0	0	0	0	0	0	0	4089.36	2508.62
77	Armenia	Colombia	South America	2.58281e+07	-7570423	560538	South America	170638	0	0	0	0	0	0	170497	140.608	0	0	0	0	0	0	0	0	25.7112	0.288794	0	0	0	0	0	0	0	0	6631.24	486.879	0	0
7	Abu `Arish	Saudi Arabia	Western Asia	8.94995e+06	4176167	2086389	Asia	74672.1	0	0	0	0	0	0	0	0	2198.62	72473.4	0	0	0	0	0	0	0	0	0.790982	8.20902	0	0	0	0	0	0	0	0	2779.61	8828.51
561	Kisaran	Indonesia	South-Eastern Asia	2.48335e+07	9977900	368140	Asia	174690	167707	0	0	0	0	0	0	0	0	0	22.5467	0	0	0	0	0	0	0	0	0	7438.2	0	0	0	0	0	0	0	0	0
404	Hakodate	Japan	Eastern Asia	7.89399e+07	11750741	4988943	Asia	344469	0	0	0	0	0	0	176268	168201	0	0	0	0	0	0	0	0	42.8291	36.1709	0	0	0	0	0	0	0	0	4115.63	4650.16	0	0
1093	Talca	Chile	South America	2.69403e+07	-6324500	-4272500	South America	117974	0	117967	7.1343	0	0	0	0	0	0	0	0	26.9736	0.0264376	0	0	0	0	0	0	0	0	4373.42	269.854	0	0	0	0	0	0	0
867	Panyabungan	Indonesia	South-Eastern Asia	6.95316e+06	9977643	106071	Asia	87743.3	0	0	0	0	0	0	0	6430.77	81312.5	0	0	0	0	0	0	0	0	1.1445	5.8555	0	0	0	0	0	0	0	0	5618.82	13886.5	0
1034	Shunan	Japan	Eastern Asia	6.78291e+07	11757338	4113059	Asia	209456	0	0	0	36062.8	169970	3423.4	0	0	0	0	0	0	0	14.2674	52.7647	0.967949	0	0	0	0	0	0	0	2527.64	3221.28	3536.75	0	0	0	0
267	Curicó	Chile	South America	1.19723e+07	-6309500	-4221500	South America	50877	0	0	0	50877	0	0	0	0	0	0	0	0	0	12	0	0	0	0	0	0	0	0	0	4239.75	0	0	0	0	0	0
104	Aydin	Turkey	Western Asia	1.39766e+07	2409357	4546929	Asia	87614.3	1198.87	0	0	0	0	0	0	0	0	0	0.962661	0	0	0	0	0	0	0	0	0	1245.37	0	0	0	0	0	0	0	0	0
593	Kumamoto	Japan	Eastern Asia	1.38614e+08	11764924	3971212	Asia	479391	0	0	0	0	0	0	400076	79314.8	0	0	0	0	0	0	0	0	108.901	30.0991	0	0	0	0	0	0	0	0	3673.76	2635.12	0	0
450	Ibarra	Ecuador	South America	1.68862e+07	-7829500	42559	South America	62704.9	0	0	0	0	0	0	0	0	55029.6	7675.33	0	0	0	0	0	0	0	0	14.0106	2.98938	0	0	0	0	0	0	0	0	3927.71	2567.53
1243	Yonago	Japan	Eastern Asia	4.98897e+07	11768160	4274400	Asia	155406	0	0	154436	970.235	0	0	0	0	0	0	0	0.00669297	48.6968	1.29653	0	0	0	0	0	0	0	0	3171.37	748.331	0	0	0	0	0	0
193	Cabanatuan	Philippines	South-Eastern Asia	1.49138e+07	11850100	1906100	Asia	54191.6	0	813.797	53377.8	0	0	0	0	0	0	0	0	0.143068	14.8569	0	0	0	0	0	0	0	0	5688.19	3592.79	0	0	0	0	0	0	0
223	Chillán	Chile	South America	2.09591e+07	-6305833	-4407262	South America	113808	0	0	87677	26131.4	0	0	0	0	0	0	0	0	17.0368	3.96319	0	0	0	0	0	0	0	0	5146.33	6593.51	0	0	0	0	0	0
568	Kitami	Japan	Eastern Asia	2.89916e+07	11771259	5210121	Asia	111983	0	0	0	0	2033.02	109950	0	0	0	0	0	0	0	0	0.523597	28.4764	0	0	0	0	0	0	0	0	3882.79	3861.11	0	0	0	0
1124	Tepic	Mexico	Central America	3.38332e+07	-10053735	2634647	North America	90713	0	0	0	0	0	0	0	10716.5	79996.5	0	0	0	0	0	0	0	0	4.2358	29.7642	0	0	0	0	0	0	0	0	2529.98	2687.68	0
681	Manizales	Colombia	South America	3.17891e+07	-7548812	625375	South America	267010	0	0	0	0	0	0	0	250411	16598.9	0	0	0	0	0	0	0	0	28.1166	3.8834	0	0	0	0	0	0	0	0	8906.16	4274.32	0
938	Rancagua	Chile	South America	2.39403e+07	-6303083	-4127792	South America	109494	0	0	0	109494	0	0	0	0	0	0	0	0	0	24	0	0	0	0	0	0	0	0	0	4562.27	0	0	0	0	0	0
821	Ödemis	Turkey	Western Asia	6.98892e+06	2413500	4590500	Asia	52755.5	0	0	0	52356.3	399.209	0	0	0	0	0	0	0	0	6.44501	0.554992	0	0	0	0	0	0	0	0	8123.55	719.306	0	0	0	0	0
425	Hiroshima	Japan	Eastern Asia	2.87299e+08	11782490	4154809	Asia	1.24055e+06	2172.62	716066	496247	26064.2	0	0	0	0	0	0	3.96227	138.26	136.967	8.80998	0	0	0	0	0	0	548.329	5179.11	3623.1	2958.49	0	0	0	0	0	0
795	Neiva	Colombia	South America	2.48335e+07	-7538460	362700	South America	144350	0	144350	0	0	0	0	0	0	0	0	0	25	0	0	0	0	0	0	0	0	0	5773.99	0	0	0	0	0	0	0	0
1213	Wiesbaden	Germany	Western Europe	9.81139e+07	627112	5876378	Europe	324681	120597	0	0	0	0	0	0	0	0	0	32.4011	0	0	0	0	0	0	0	0	0	3722.02	0	0	0	0	0	0	0	0	0
1236	Yatsushiro	Japan	Eastern Asia	2.69232e+07	11778019	3935685	Asia	85004.2	0	0	0	0	0	55004.4	29999.8	0	0	0	0	0	0	0	0	17.3322	9.66784	0	0	0	0	0	0	0	0	3173.54	3103.06	0	0	0
244	Ciudad Guzmán	Mexico	Central America	1.59171e+07	-9990438	2417375	North America	70808.9	0	0	0	0	0	0	0	70808.9	0	0	0	0	0	0	0	0	0	16	0	0	0	0	0	0	0	0	0	4425.56	0	0
968	Salihli	Turkey	Western Asia	8.98628e+06	2422944	4619167	Asia	57290.7	0	0	0	0	0	0	57290.7	0	0	0	0	0	0	0	0	0	9	0	0	0	0	0	0	0	0	0	6365.63	0	0	0
475	Iwakuni	Japan	Eastern Asia	6.08484e+07	11782320	4127877	Asia	152098	0	0	152098	0	0	0	0	0	0	0	0	0	61	0	0	0	0	0	0	0	0	0	2493.41	0	0	0	0	0	0	0
1119	Temuco	Chile	South America	2.49633e+07	-6235900	-4647820	South America	100549	0	70.1484	100479	0	0	0	0	0	0	0	0	0.0944859	24.9055	0	0	0	0	0	0	0	0	742.422	4034.4	0	0	0	0	0	0	0
843	Padang	Indonesia	South-Eastern Asia	1.40057e+08	10059684	-114337	Asia	575896	0	0	0	0	0	63901.2	432458	79536.8	0	0	0	0	0	0	0	15.5081	100.822	24.6698	0	0	0	0	0	0	0	4120.49	4289.32	3224.05	0	0
156	Beppu	Japan	Eastern Asia	4.38825e+07	11791023	4029568	Asia	131121	0	0	0	0	0	0	0	0	74445.6	56675.5	0	0	0	0	0	0	0	0	28.1417	15.8583	0	0	0	0	0	0	0	0	2645.39	3573.86
449	Ibagué	Colombia	South America	3.37751e+07	-7523029	549029	South America	238660	0	0	0	0	0	0	0	101263	137396	0	0	0	0	0	0	0	0	21.1452	12.8548	0	0	0	0	0	0	0	0	4788.96	10688.3	0
183	Bukittinggi	Indonesia	South-Eastern Asia	2.97992e+07	10060967	-38467	Asia	211353	0	0	0	0	0	0	0	0	134371	76982.6	0	0	0	0	0	0	0	0	19.2921	10.7079	0	0	0	0	0	0	0	0	6965.05	7189.34
769	Musan	North Korea	Eastern Asia	6.99538e+06	10743643	5036643	Asia	78797.8	78538.4	0	0	0	0	0	0	0	0	0	6.75223	0	0	0	0	0	0	0	0	0	11631.5	0	0	0	0	0	0	0	0	0
488	Jeju-si	South Korea	Eastern Asia	3.09185e+07	11329823	4051468	Asia	141310	0	0	0	0	0	0	0	426.281	140884	0	0	0	0	0	0	0	0	0.456507	30.5435	0	0	0	0	0	0	0	0	933.789	4612.58	0
597	Kure	Japan	Eastern Asia	2.19456e+07	11806273	4135909	Asia	109944	98542.2	0	0	0	0	0	0	0	0	0	20.6138	0	0	0	0	0	0	0	0	0	4780.39	0	0	0	0	0	0	0	0	0
834	Osorno	Chile	South America	1.89802e+07	-6177868	-4854184	South America	74514.8	0	28496.3	46018.5	0	0	0	0	0	0	0	0	7.54626	11.4537	0	0	0	0	0	0	0	0	3776.22	4017.77	0	0	0	0	0	0	0
789	Nazilli	Turkey	Western Asia	9.98347e+06	2450600	4555100	Asia	68758	0	0	68758	0	0	0	0	0	0	0	0	0	10	0	0	0	0	0	0	0	0	0	6875.8	0	0	0	0	0	0	0
89	Arusha	Tanzania	Eastern Africa	3.17872e+07	3672625	-415531	Africa	67149.5	0	0	0	0	0	0	0	0	67149.5	0	0	0	0	0	0	0	0	0	32	0	0	0	0	0	0	0	0	0	2098.42	0
822	Oita	Japan	Eastern Asia	9.47449e+07	11810721	4021111	Asia	195571	0	0	0	0	0	0	7432.19	160530	27609.1	0	0	0	0	0	0	0	10.6592	73.0055	11.3352	0	0	0	0	0	0	0	697.253	2198.87	2435.69	0
916	Puerto Montt	Chile	South America	1.49875e+07	-6109767	-4952900	South America	63533.7	0	0	0	0	0	0	51700.1	11833.5	0	0	0	0	0	0	0	0	11.5166	3.48337	0	0	0	0	0	0	0	0	4489.17	3397.15	0	0
143	Batusangkar	Indonesia	South-Eastern Asia	9.93306e+06	10080500	-56300	Asia	54498	0	0	0	0	0	0	0	0	54498	0	0	0	0	0	0	0	0	0	10	0	0	0	0	0	0	0	0	0	5449.8	0
447	Hyesan	North Korea	Eastern Asia	1.39881e+07	10744500	4946071	Asia	137222	0	0	0	137222	0	0	0	0	0	0	0	0	0	14	0	0	0	0	0	0	0	0	0	9801.57	0	0	0	0	0	0
819	Obihiro	Japan	Eastern Asia	4.99752e+07	11821220	5113800	Asia	137816	0	0	0	1040.83	136775	0	0	0	0	0	0	0	0	0.780446	49.2196	0	0	0	0	0	0	0	0	1333.63	2778.87	0	0	0	0	0
317	Durango	Mexico	Central America	7.56591e+07	-9916382	2937500	North America	291404	0	0	0	0	0	0	0	250854	40550.3	0	0	0	0	0	0	0	0	65.5388	10.4612	0	0	0	0	0	0	0	0	3827.56	3876.25	0
757	Moshi	Tanzania	Eastern Africa	1.78803e+07	3738444	-415389	Africa	52811.5	0	0	0	52811.5	0	0	0	0	0	0	0	0	0	18	0	0	0	0	0	0	0	0	0	2933.97	0	0	0	0	0	0
883	Payakumbuh	Indonesia	South-Eastern Asia	1.19197e+07	10085500	-28750	Asia	50471.2	0	0	0	0	0	0	0	50471.2	0	0	0	0	0	0	0	0	0	12	0	0	0	0	0	0	0	0	0	4205.94	0	0
416	Heerlen	Germany	Western Europe	7.41009e+07	450568	5967419	Europe	211983	77215.4	0	0	0	0	0	0	0	0	0	30.6376	0	0	0	0	0	0	0	0	0	2520.28	0	0	0	0	0	0	0	0	0
507	Kagoshima	Japan	Eastern Asia	1.19635e+08	11846617	3827250	Asia	437688	0	0	0	0	0	0	0	0	389041	48646.3	0	0	0	0	0	0	0	0	100.583	19.4172	0	0	0	0	0	0	0	0	3867.87	2505.33
160	Binangonan	Philippines	South-Eastern Asia	2.58476e+07	11907346	1783192	Asia	93640.2	0	0	0	0	0	79835.3	13804.9	0	0	0	0	0	0	0	0	19.7853	6.2147	0	0	0	0	0	0	0	0	4035.08	2221.33	0	0	0
269	Cusco	Peru	South America	4.17494e+07	-7086929	-1667071	South America	185990	167852	18137.5	0	0	0	0	0	0	0	0	30.8863	11.1137	0	0	0	0	0	0	0	0	5434.53	1631.99	0	0	0	0	0	0	0	0
22	Aira	Japan	Eastern Asia	2.49248e+07	11842940	3845140	Asia	69595.9	0	0	0	0	0	0	0	0	0	69595.9	0	0	0	0	0	0	0	0	0	25	0	0	0	0	0	0	0	0	0	2783.84
139	Batangas City	Philippines	South-Eastern Asia	2.58455e+07	11916808	1695462	Asia	79284.3	0	0	0	0	0	0	14651.5	64632.8	0	0	0	0	0	0	0	0	4.59648	21.4035	0	0	0	0	0	0	0	0	3187.55	3019.73	0	0
73	Arequipa	Peru	South America	6.86114e+07	-6986703	-2018341	South America	360539	0	0	0	0	0	0	0	79445.5	281094	0	0	0	0	0	0	0	0	16.7186	52.2814	0	0	0	0	0	0	0	0	4751.92	5376.55	0
126	Bangkinang	Indonesia	South-Eastern Asia	7.94645e+06	10124625	42000	Asia	68266.4	23344	0	0	0	0	0	0	0	0	0	3.3661	0	0	0	0	0	0	0	0	0	6935.01	0	0	0	0	0	0	0	0	0
353	Fukuyama	Japan	Eastern Asia	7.78113e+07	11860513	4163397	Asia	140366	24204.5	0	0	0	0	0	0	0	0	0	16.5922	0	0	0	0	0	0	0	0	0	1458.79	0	0	0	0	0	0	0	0	0
373	Girardot	Colombia	South America	1.68875e+07	-7483618	531735	South America	73518.2	0	0	6893.31	66624.9	0	0	0	0	0	0	0	0	2.73885	14.2612	0	0	0	0	0	0	0	0	2516.87	4671.78	0	0	0	0	0	0
828	Onomichi	Japan	Eastern Asia	5.0876e+07	11849382	4156618	Asia	97879.3	97879.3	0	0	0	0	0	0	0	0	0	51	0	0	0	0	0	0	0	0	0	1919.2	0	0	0	0	0	0	0	0	0
892	Perpignan	France	Western Europe	2.29873e+07	239109	5088761	Europe	77636.5	0	0	0	77636.5	0	0	0	0	0	0	0	0	0.00114333	22.9989	0	0	0	0	0	0	0	0	0	3375.67	0	0	0	0	0	0
559	Kirishima	Japan	Eastern Asia	3.68889e+07	11852959	3846635	Asia	101977	0	0	0	0	0	0	0	0	101977	0	0	0	0	0	0	0	0	0	37	0	0	0	0	0	0	0	0	0	2756.13	0
248	Clermont-Ferrand	France	Western Europe	5.10088e+07	248127	5424657	Europe	183971	0	0	0	0	0	0	0	0	65319.1	118652	0	0	0	0	0	0	0	0	23.8019	27.1981	0	0	0	0	0	0	0	0	2744.29	4362.51
292	Denizli	Turkey	Western Asia	3.09478e+07	2519435	4539629	Asia	187951	15538	0	0	0	0	0	0	0	0	0	4.39125	0	0	0	0	0	0	0	0	0	3538.4	0	0	0	0	0	0	0	0	0
63	Aomori	Japan	Eastern Asia	4.99507e+07	11862400	4881080	Asia	170881	0	0	0	0	0	0	0	119470	51411.5	0	0	0	0	0	0	0	0	36.2866	13.7134	0	0	0	0	0	0	0	0	3292.4	3748.98	0
1079	Tacna	Peru	South America	2.18807e+07	-6825182	-2211955	South America	63383	0	0	0	16795.9	46587.2	0	0	0	0	0	0	0	0	7.09423	14.9058	0	0	0	0	0	0	0	0	2367.54	3125.45	0	0	0	0	0
1184	Usak	Turkey	Western Asia	1.09837e+07	2527136	4640591	Asia	68274.7	0	43.4844	68231.2	0	0	0	0	0	0	0	0	0.0235202	10.9765	0	0	0	0	0	0	0	0	1848.81	6216.13	0	0	0	0	0	0	0
758	Muara Bungo	Indonesia	South-Eastern Asia	8.93983e+06	10231722	-184389	Asia	69227.6	69227.6	0	0	0	0	0	0	0	0	0	9	0	0	0	0	0	0	0	0	0	7691.95	0	0	0	0	0	0	0	0	0
424	Hirosaki	Japan	Eastern Asia	2.49741e+07	11864220	4856500	Asia	83466.4	0	0	0	0	0	0	0	0	83466.4	0	0	0	0	0	0	0	0	0	25	0	0	0	0	0	0	0	0	0	3338.66	0
1254	Zamora	Mexico	Central America	1.59178e+07	-9865188	2452125	North America	51997.7	0	0	0	4159.96	47837.7	0	0	0	0	0	0	0	0	0.862372	15.1376	0	0	0	0	0	0	0	0	4823.86	3160.19	0	0	0	0	0
626	Lido di Ostia	Italy	Southern Europe	1.09915e+07	1025591	4982136	Europe	70964.3	0	0	0	0	0	139.695	70824.6	0	0	0	0	0	0	0	0	1.01383	9.98617	0	0	0	0	0	0	0	0	137.789	7092.27	0	0	0
808	Nobeoka	Japan	Eastern Asia	3.49011e+07	11868329	3944300	Asia	110653	0	0	0	110653	0	0	0	0	0	0	0	0	0	35	0	0	0	0	0	0	0	0	0	3161.52	0	0	0	0	0	0
1183	Uruapan	Mexico	Central America	3.48172e+07	-9864214	2382643	North America	105516	0	0	0	483.367	105032	0	0	0	0	0	0	0	0	0.19986	34.8001	0	0	0	0	0	0	0	0	2418.53	3018.15	0	0	0	0	0
12	Acilia	Italy	Southern Europe	3.19755e+07	1032594	4986188	Europe	104647	0	0	0	0	0	0	61292.5	43354.5	0	0	0	0	0	0	0	0	17.4999	14.5001	0	0	0	0	0	0	0	0	3502.46	2989.94	0	0
950	Rome	Italy	Southern Europe	3.68727e+08	1044871	4998939	Europe	2018140	0	0	0	0	0	0	204349	1.3068e+06	499515	7478.18	0	0	0	0	0	0	44.0158	199.519	122.441	3.02416	0	0	0	0	0	0	4642.62	6549.75	4079.63	2472.81
748	Miyakonojo	Japan	Eastern Asia	3.58918e+07	11882722	3846111	Asia	119451	0	0	0	0	0	0	62856.2	56594.5	0	0	0	0	0	0	0	0	17.5068	18.4932	0	0	0	0	0	0	0	0	3590.39	3060.29	0	0
1126	Terni	Italy	Southern Europe	2.89832e+07	1046879	5074259	Europe	87487.3	39400.8	48086.5	0	0	0	0	0	0	0	0	15.8287	13.1713	0	0	0	0	0	0	0	0	2489.2	3650.86	0	0	0	0	0	0	0	0
989	Sana'a	Yemen	Western Asia	9.14698e+07	4332391	1888500	Asia	261496	0	0	0	0	0	0	142120	119376	0	0	0	0	0	0	0	0	50.4304	41.5696	0	0	0	0	0	0	0	0	2818.13	2871.72	0	0
749	Miyazaki	Japan	Eastern Asia	4.48665e+07	11899344	3867122	Asia	118845	0	0	0	0	111381	7463.87	0	0	0	0	0	0	0	0	41.5577	3.44227	0	0	0	0	0	0	0	0	2680.14	2168.3	0	0	0	0
268	Curup	Indonesia	South-Eastern Asia	2.28472e+07	10263674	-430587	Asia	143530	0	0	0	0	0	0	0	0	135390	8139.81	0	0	0	0	0	0	0	0	20.1794	2.82064	0	0	0	0	0	0	0	0	6709.35	2885.81
600	Kushiro	Japan	Eastern Asia	6.39692e+07	11911922	5121031	Asia	175619	0	0	0	0	144436	31183	0	0	0	0	0	0	0	0	49.5806	14.4194	0	0	0	0	0	0	0	0	2913.16	2162.58	0	0	0	0
651	Lucena	Philippines	South-Eastern Asia	1.49112e+07	11965767	1717233	Asia	78580.8	0	0	0	0	0	0	0	57914.3	20666.5	0	0	0	0	0	0	0	0	10.1742	4.82584	0	0	0	0	0	0	0	0	5692.3	4282.47	0
70	Arba Minch	Ethiopia	Eastern Africa	1.0928e+07	3750773	743864	Africa	57886.2	57886.2	0	0	0	0	0	0	0	0	0	11	0	0	0	0	0	0	0	0	0	5262.39	0	0	0	0	0	0	0	0	0
25	Akita	Japan	Eastern Asia	7.99008e+07	11927475	4758638	Asia	205456	0	0	0	0	0	140205	65250.9	0	0	0	0	0	0	0	0	43.626	36.374	0	0	0	0	0	0	0	0	3213.8	1793.89	0	0	0
614	Latina	Italy	Southern Europe	1.29891e+07	1080269	4952115	Europe	50041.8	0	0	0	0	0	0	50041.8	0	0	0	0	0	0	0	0	0	13	0	0	0	0	0	0	0	0	0	3849.37	0	0	0
682	Manna	Indonesia	South-Eastern Asia	1.19206e+07	10294833	-550833	Asia	64488.9	0	0	0	0	11278.6	53210.3	0	0	0	0	0	0	0	0	3.27841	8.72159	0	0	0	0	0	0	0	0	3440.26	6100.99	0	0	0	0
650	Lubuklinggau	Indonesia	South-Eastern Asia	1.49002e+07	10298633	-406967	Asia	91904.7	0	0	0	0	0	0.695312	91904	0	0	0	0	0	0	0	0	0.0601114	14.9399	0	0	0	0	0	0	0	0	11.5671	6151.59	0	0	0
512	Kanazawa	Japan	Eastern Asia	1.54697e+08	11950500	4402906	Asia	461460	0	0	0	0	94274.2	367186	0	0	0	0	0	0	0	0	53.863	101.137	0	0	0	0	0	0	0	0	1750.26	3630.58	0	0	0	0
753	Morelia	Mexico	Central America	7.75959e+07	-9771705	2417667	North America	233226	0	0	0	113456	119771	0	0	0	0	0	0	0	0	36.2769	41.7231	0	0	0	0	0	0	0	0	3127.49	2870.61	0	0	0	0	0
451	Ibb	Yemen	Western Asia	1.39171e+07	4345929	1720000	Asia	93070	0	93070	0	0	0	0	0	0	0	0	0	14	0	0	0	0	0	0	0	0	0	6647.85	0	0	0	0	0	0	0	0
609	Lahat	Indonesia	South-Eastern Asia	1.49005e+07	10363833	-467900	Asia	127712	0	0	0	0	127712	0	0	0	0	0	0	0	0	0	15	0	0	0	0	0	0	0	0	0	8514.12	0	0	0	0	0
396	Hachinohe	Japan	Eastern Asia	6.09356e+07	11960713	4847615	Asia	124104	0	0	0	0	118100	6003.63	0	0	0	0	0	0	0	0.358271	57.1814	3.46036	0	0	0	0	0	0	0	0	2065.36	1734.97	0	0	0	0
459	Iloilo City	Philippines	South-Eastern Asia	6.7576e+07	12149441	1320794	Asia	288374	0	0	199627	88747.7	0	0	0	0	0	0	0	0	49.1455	18.8545	0	0	0	0	0	0	0	0	4061.96	4706.97	0	0	0	0	0	0
350	Fukui	Japan	Eastern Asia	4.4907e+07	11962744	4346700	Asia	121176	0	0	0	0	63875.9	57299.6	0	0	0	0	0	0	0	0	22.9673	22.0327	0	0	0	0	0	0	0	0	2781.16	2600.67	0	0	0	0
787	Naples	Italy	Southern Europe	5.43468e+08	1207824	4884950	Europe	2.75098e+06	0	0	0	0	0	0	0	60112.5	1.48808e+06	1.20279e+06	0	0	0	0	0	0	0	21.546	306.794	215.66	0	0	0	0	0	0	0	2789.96	4850.42	5577.25
1182	Uriangato	Mexico	Central America	1.49232e+07	-9753767	2469433	North America	52383.2	0	0	0	52383.2	0	0	0	0	0	0	0	0	0	15	0	0	0	0	0	0	0	0	0	3492.21	0	0	0	0	0	0
205	Caserta	Italy	Southern Europe	6.09433e+07	1203057	4908238	Europe	199471	0	0	0	0	0	0	51903.7	147567	0	0	0	0	0	0	0	0	17.5695	43.4305	0	0	0	0	0	0	0	0	2954.2	3397.78	0	0
1087	Takaoka	Japan	Eastern Asia	6.38776e+07	11970344	4424766	Asia	102338	0	0	0	0	78149.9	24188.2	0	0	0	0	0	0	0	0	46.4916	17.5084	0	0	0	0	0	0	0	0	1680.95	1381.52	0	0	0	0
464	Irapuato	Mexico	Central America	4.17886e+07	-9748238	2535714	North America	155427	79824.2	0	0	0	0	0	0	0	0	0	15.5458	0	0	0	0	0	0	0	0	0	5134.76	0	0	0	0	0	0	0	0	0
72	Areka	Ethiopia	Eastern Africa	3.97403e+06	3761500	873000	Africa	74447.8	0	0	0	0	0	74447.8	0	0	0	0	0	0	0	0	0	4	0	0	0	0	0	0	0	0	0	18611.9	0	0	0	0
759	Muara Enim	Indonesia	South-Eastern Asia	8.94024e+06	10387389	-451944	Asia	66041.2	0	66041.2	0	0	0	0	0	0	0	0	0	9	0	0	0	0	0	0	0	0	0	7337.91	0	0	0	0	0	0	0	0
319	Echizen	Japan	Eastern Asia	2.79411e+07	11973821	4327964	Asia	84235	0	0	0	50173.7	34061.4	0	0	0	0	0	0	0	0	15.1902	12.8098	0	0	0	0	0	0	0	0	3303.04	2659	0	0	0	0	0
531	Keban Agung	Indonesia	South-Eastern Asia	1.19204e+07	10389333	-464333	Asia	85631.6	0	9.50781	85622.1	0	0	0	0	0	0	0	0	0.214814	11.7852	0	0	0	0	0	0	0	0	44.2606	7265.23	0	0	0	0	0	0	0
1152	Toyama	Japan	Eastern Asia	4.99037e+07	11990780	4418180	Asia	101941	0	0	0	0	0	6.6875	101934	0	0	0	0	0	0	0	0	0.0166779	49.9833	0	0	0	0	0	0	0	0	400.979	2039.37	0	0	0
364	Gela	Italy	Southern Europe	1.99631e+07	1241450	4458750	Europe	70602.8	13376.2	0	0	0	0	0	0	0	0	0	4.78562	0	0	0	0	0	0	0	0	0	2795.08	0	0	0	0	0	0	0	0	0
296	Dhamar	Yemen	Western Asia	2.18712e+07	4361455	1790773	Asia	92080.4	0	0	0	0	0	0	21899.7	70180.7	0	0	0	0	0	0	0	0	6.10762	15.8924	0	0	0	0	0	0	0	0	3585.63	4416	0	0
108	Bacolod	Philippines	South-Eastern Asia	9.04322e+07	12191357	1314060	Asia	298383	0	0	0	0	0	0	263093	35290	0	0	0	0	0	0	0	0.00223995	78.662	12.3358	0	0	0	0	0	0	0	0	3344.6	2860.79	0	0
967	Salerno	Italy	Southern Europe	2.89704e+07	1246638	4864810	Europe	126455	0	0	0	0	0	0	125346	1109.57	0	0	0	0	0	0	0	0	28.2732	0.726811	0	0	0	0	0	0	0	0	4433.38	1526.63	0	0
142	Baturaja	Indonesia	South-Eastern Asia	1.19205e+07	10423833	-509250	Asia	103665	0	103665	0	0	0	0	0	0	0	0	0	12	0	0	0	0	0	0	0	0	0	8638.75	0	0	0	0	0	0	0	0
964	Salamanca	Mexico	Central America	2.78586e+07	-9737286	2522821	North America	89293.7	77499.6	0	0	0	0	0	0	0	0	0	20.4881	0	0	0	0	0	0	0	0	0	3782.66	0	0	0	0	0	0	0	0	0
141	Battipaglia	Italy	Southern Europe	1.29865e+07	1264577	4857500	Europe	52760.8	0	0	0	0	42873.3	9887.53	0	0	0	0	0	0	0	0	11.1734	1.82661	0	0	0	0	0	0	0	0	3837.09	5413.05	0	0	0	0
1235	Yarim	Yemen	Western Asia	6.95882e+06	4362071	1760786	Asia	79648.2	0	0	0	0	0	79648.2	0	0	0	0	0	0	0	0	0	7	0	0	0	0	0	0	0	0	0	11378.3	0	0	0	0
619	Legazpi	Philippines	South-Eastern Asia	3.18078e+07	12199781	1620500	Asia	70216	0	0	0	0	0	0	0	0	70216	0	0	0	0	0	0	0	0	0	32	0	0	0	0	0	0	0	0	0	2194.25	0
1158	Tsuruoka	Japan	Eastern Asia	2.09692e+07	12011310	4646976	Asia	109023	0	0	0	0	0	0	108671	351.803	0	0	0	0	0	0	0	0	20.4493	0.550685	0	0	0	0	0	0	0	0	5314.18	638.847	0	0
207	Catania	Italy	Southern Europe	1.01823e+08	1308098	4511873	Europe	455475	0	0	0	0	0	0	7460.34	436225	11789.6	0	0	0	0	0	0	0	3.57933	93.8346	4.58611	0	0	0	0	0	0	0	2084.29	4648.88	2570.71	0
754	Morioka	Japan	Eastern Asia	5.99255e+07	12017217	4757717	Asia	203787	0	0	0	0	0	0	0	95227.3	108559	0	0	0	0	0	0	0	0	22.6674	37.3326	0	0	0	0	0	0	0	0	4201.07	2907.9	0
13	Acireale	Italy	Southern Europe	1.39759e+07	1314214	4519714	Europe	54692.5	0	0	0	0	0	0	0	49216.2	5476.32	0	0	0	0	0	0	0	0	11.8858	2.11417	0	0	0	0	0	0	0	0	4140.74	2590.3	0
1074	Syracuse	Italy	Southern Europe	2.4954e+07	1330900	4461180	Europe	99200.1	0	4562.82	94637.2	0	0	0	0	0	0	0	0	2.62788	22.3721	0	0	0	0	0	0	0	0	1736.31	4230.14	0	0	0	0	0	0	0
805	Niigata	Japan	Eastern Asia	1.05825e+08	12028934	4554858	Asia	317302	0	0	107360	209942	0	0	0	0	0	0	0	0	41.8048	64.1952	0	0	0	0	0	0	0	0	2568.14	3270.37	0	0	0	0	0	0
966	Salem	United States of America	Northern America	5.39988e+07	-9940685	5335019	North America	78090	37443.7	0	0	0	0	0	0	0	0	0	21.5364	0	0	0	0	0	0	0	0	0	1738.62	0	0	0	0	0	0	0	0	0
724	Messina	Italy	Southern Europe	4.49284e+07	1341567	4585944	Europe	200835	0	0	0	0	200835	0	0	0	0	0	0	0	0	0	45	0	0	0	0	0	0	0	0	0	4463.01	0	0	0	0	0
906	Portland	United States of America	Northern America	2.6203e+08	-9845866	5397779	North America	349294	0	0	0	99842.4	242204	7247.29	0	0	0	0	0	0	0	86.3057	170.268	5.42603	0	0	0	0	0	0	0	1156.85	1422.49	1335.65	0	0	0	0
940	Reggio Calabria	Italy	Southern Europe	3.49437e+07	1351957	4576929	Europe	125141	0	0	6505.76	118635	0	0	0	0	0	0	0	0	2.75892	32.2411	0	0	0	0	0	0	0	0	2358.08	3679.62	0	0	0	0	0	0
170	Boditi	Ethiopia	Eastern Africa	6.9545e+06	3776786	858929	Africa	62434.3	0	0	0	0	0	0	0	62434.3	0	0	0	0	0	0	0	0	0	7	0	0	0	0	0	0	0	0	0	8919.18	0	0
1080	Tacoma	United States of America	Northern America	1.28065e+08	-9643133	5579695	North America	114173	0	0	28020.8	86036.6	115.407	0	0	0	0	0	0	0	25.4033	102.472	0.124717	0	0	0	0	0	0	0	1103.04	839.611	925.346	0	0	0	0	0
1127	Terrassa	Spain	Southern Europe	1.99837e+07	169250	4963000	Europe	156142	0	63363.8	92778.2	0	0	0	0	0	0	0	0	9.75486	10.2451	0	0	0	0	0	0	0	0	6495.61	9055.83	0	0	0	0	0	0	0
516	Karaj	Iran	Southern Asia	1.55667e+08	4489077	4309942	Asia	988344	17784.4	0	0	0	0	0	0	0	0	0	7.34368	0	0	0	0	0	0	0	0	0	2421.73	0	0	0	0	0	0	0	0	0
495	Joetsu	Japan	Eastern Asia	3.69327e+07	12034284	4472311	Asia	96157.2	0	0	0	0	0	9606.95	81199.4	5350.82	0	0	0	0	0	0	0	6.04196	28.7503	2.20773	0	0	0	0	0	0	0	1590.04	2824.3	2423.68	0	0
588	Kotabumi	Indonesia	South-Eastern Asia	2.08614e+07	10489786	-597643	Asia	165975	0	165975	0	0	0	0	0	0	0	0	0	21	0	0	0	0	0	0	0	0	0	7903.59	0	0	0	0	0	0	0	0
993	Sant Boi de Llobregat	Spain	Southern Europe	1.89835e+07	169658	4937132	Europe	134633	7331.24	0	0	0	0	0	0	0	0	0	1.95297	0	0	0	0	0	0	0	0	0	3753.89	0	0	0	0	0	0	0	0	0
910	Pringsewu	Indonesia	South-Eastern Asia	1.39079e+07	10492429	-661357	Asia	69983.2	0	13077.1	56906.1	0	0	0	0	0	0	0	0	2.67985	11.3202	0	0	0	0	0	0	0	0	4879.78	5026.98	0	0	0	0	0	0	0
211	Cebu City	Philippines	South-Eastern Asia	1.78872e+08	12294722	1271728	Asia	747547	137536	556143	53869	0	0	0	0	0	0	0	56.2662	99.4621	24.2717	0	0	0	0	0	0	0	2444.37	5591.5	2219.42	0	0	0	0	0	0	0
136	Barcelona	Spain	Southern Europe	2.79764e+08	181636	4949482	Europe	2381551	1.08845e+06	966433	291579	70.3414	0	0	0	0	0	0	100.39	109.297	62.5257	0.0415568	0	0	0	0	0	0	10842.2	8842.25	4663.35	1692.66	0	0	0	0	0	0
529	Kashiwazaki	Japan	Eastern Asia	1.7968e+07	12041611	4493222	Asia	72300.1	0	0	0	72300.1	0	0	0	0	0	0	0	0	0	18	0	0	0	0	0	0	0	0	0	4016.67	0	0	0	0	0	0
1011	Seattle	United States of America	Northern America	2.99179e+08	-9589022	5620808	North America	400528	187814	91118	12292.2	0	0	0	0	0	0	0	121.243	89.4149	9.93907	0	0	0	0	0	0	0	1549.07	1019.05	1236.75	0	0	0	0	0	0	0
385	Granollers	Spain	Southern Europe	1.29895e+07	191346	4968115	Europe	60393	0	0	0	60393	0	0	0	0	0	0	0	0	0	13	0	0	0	0	0	0	0	0	0	4645.62	0	0	0	0	0	0
1031	Shone	Ethiopia	Eastern Africa	4.96756e+06	3785700	882100	Africa	56487.5	0	0	0	0	0	0	0	0	56487.5	0	0	0	0	0	0	0	0	0	5	0	0	0	0	0	0	0	0	0	11297.5	0
696	Mataró	Spain	Southern Europe	1.29893e+07	203885	4960577	Europe	90809.9	0	0	58880.3	31929.6	0	0	0	0	0	0	0	0	8.82982	4.17018	0	0	0	0	0	0	0	0	6668.35	7656.63	0	0	0	0	0	0
886	Pemanggilan	Indonesia	South-Eastern Asia	1.49013e+07	10514967	-653767	Asia	77839.9	0	0	52222.4	25617.4	0	0	0	0	0	0	0	0	12.3775	2.62249	0	0	0	0	0	0	0	0	4219.14	9768.38	0	0	0	0	0	0
990	Sanjo	Japan	Eastern Asia	2.39587e+07	12049833	4522417	Asia	86265.5	0	0	0	584.602	85680.9	0	0	0	0	0	0	0	0	0.385885	23.6141	0	0	0	0	0	0	0	0	1514.96	3628.37	0	0	0	0	0
1114	Tehran	Iran	Southern Asia	7.02482e+08	4522526	4300010	Asia	4946068	366097	271344	1.47812e+06	1.84938e+06	297497	0	0	0	0	0	75.595	93.8504	213.633	205.156	47.6702	0	0	0	0	0	4842.88	2891.24	6918.97	9014.51	6240.73	0	0	0	0	0
121	Bandar Lampung	Indonesia	South-Eastern Asia	8.04673e+07	10521130	-668858	Asia	262290	0	0	0	45357	207352	9581.08	0	0	0	0	0	0	0	20.3569	54.9665	5.67657	0	0	0	0	0	0	0	2228.09	3772.34	1687.83	0	0	0	0
374	Girona	Spain	Southern Europe	1.09921e+07	233955	5008955	Europe	61587.3	0	0	0	0	0	0	61438.2	149.17	0	0	0	0	0	0	0	0	10.3163	0.683724	0	0	0	0	0	0	0	0	5955.46	218.172	0	0
777	Nagoya	Japan	Eastern Asia	2.05531e+09	12108292	4238130	Asia	6.47382e+06	1.95179e+06	1.55518e+06	367691	0	0	0	0	0	0	0	424.492	489.494	153.507	0	0	0	0	0	0	0	4597.96	3177.11	2395.27	0	0	0	0	0	0	0
725	Metro	Indonesia	South-Eastern Asia	2.58287e+07	10528923	-632962	Asia	85090.2	0	57841.1	27249.1	0	0	0	0	0	0	0	0	16.1541	9.84588	0	0	0	0	0	0	0	0	3580.58	2767.57	0	0	0	0	0	0	0
773	Nagano	Japan	Eastern Asia	3.59302e+07	12081417	4411889	Asia	93310.7	0	0	0	0	0	0	90.125	93220.6	0	0	0	0	0	0	0	0	0.0345218	35.9655	0	0	0	0	0	0	0	0	2610.67	2591.95	0	0
1142	Toluca	Mexico	Central America	8.55491e+07	-9635930	2366814	North America	196280	0	0	0	0	0	0	1425.38	169638	25217.1	0	0	0	0	0	0	0	0.482139	74.0398	11.4781	0	0	0	0	0	0	0	2956.36	2291.17	2196.98	0
26	Aksaray	Turkey	Western Asia	1.59752e+07	2931438	4606625	Asia	58756.1	0	0	0	0	0	0	18553.9	40202.3	0	0	0	0	0	0	0	0	7.64094	8.35906	0	0	0	0	0	0	0	0	2428.22	4809.43	0	0
41	Alaba Kulito	Ethiopia	Eastern Africa	5.96113e+06	3798333	902667	Africa	90153.9	0	0	0	0	0	0	0	90153.9	0	0	0	0	0	0	0	0	0	6	0	0	0	0	0	0	0	0	0	15025.6	0	0
1049	Sohung	North Korea	Eastern Asia	3.99384e+06	10872500	4612000	Asia	54974.7	54974.7	0	0	0	0	0	0	0	0	0	4	0	0	0	0	0	0	0	0	0	13743.7	0	0	0	0	0	0	0	0	0
513	Kani	Japan	Eastern Asia	3.7916e+07	12096684	4272316	Asia	96848.8	0	0	0	96848.8	0	0	0	0	0	0	0	0	0	38	0	0	0	0	0	0	0	0	0	2548.65	0	0	0	0	0	0
130	Banjarmasin	Indonesia	South-Eastern Asia	1.09282e+07	10566045	-788500	Asia	73512.8	0	0	0	0	0	0	0	0	73512.8	0	0	0	0	0	0	0	0	0	11	0	0	0	0	0	0	0	0	0	6682.99	0
580	Koksan	North Korea	Eastern Asia	3.99418e+06	10875500	4653000	Asia	74371	0	0	74371	0	0	0	0	0	0	0	0	0	4	0	0	0	0	0	0	0	0	0	18592.8	0	0	0	0	0	0	0
700	Matsumoto	Japan	Eastern Asia	2.29532e+07	12101717	4363587	Asia	58393.3	0	0	0	0	0	0	58393.3	0	0	0	0	0	0	0	0	0	23	0	0	0	0	0	0	0	0	0	2538.84	0	0	0
927	Qarchak	Iran	Southern Asia	1.59643e+07	4561562	4261688	Asia	91408.8	0	68811.1	22597.7	0	0	0	0	0	0	0	0	9.68718	6.31282	0	0	0	0	0	0	0	0	7103.32	3579.65	0	0	0	0	0	0	0
180	Braja Asri	Indonesia	South-Eastern Asia	7.94731e+06	10567250	-639000	Asia	57108.1	0	0	0	57108.1	0	0	0	0	0	0	0	0	0	8	0	0	0	0	0	0	0	0	0	7138.52	0	0	0	0	0	0
1232	Yamagata	Japan	Eastern Asia	3.49448e+07	12104700	4593014	Asia	128737	0	0	0	0	0	0	0	0	128737	0	0	0	0	0	0	0	0	0	35	0	0	0	0	0	0	0	0	0	3678.21	0
980	San Juan del Río	Mexico	Central America	2.38781e+07	-9627208	2500458	North America	57137.2	0	0	57137.2	0	0	0	0	0	0	0	0	0	24	0	0	0	0	0	0	0	0	0	2380.72	0	0	0	0	0	0	0
1173	Ueda	Japan	Eastern Asia	2.89421e+07	12110534	4382707	Asia	102884	0	0	0	0	0	0	0	102884	0	0	0	0	0	0	0	0	0	29	0	0	0	0	0	0	0	0	0	3547.74	0	0
765	Munchon	North Korea	Eastern Asia	1.49798e+07	10890300	4705300	Asia	88630.2	7126.35	0	0	0	0	0	0	0	0	0	2.62852	0	0	0	0	0	0	0	0	0	2711.17	0	0	0	0	0	0	0	0	0
1086	Tajimi	Japan	Eastern Asia	2.5942e+07	12111808	4262192	Asia	80212.8	0	0	27150.8	53061.9	0	0	0	0	0	0	0	0	9.45689	16.5431	0	0	0	0	0	0	0	0	2871.01	3207.49	0	0	0	0	0	0
265	Cuernavaca	Mexico	Central America	6.46559e+07	-9607608	2323885	North America	105327	0	0	0	0	0	0	0	103561	1766.12	0	0	0	0	0	0	0	0	63.9389	1.06111	0	0	0	0	0	0	0	0	1619.69	1664.4	0
896	Pishva	Iran	Southern Asia	9.97764e+06	4569400	4258700	Asia	79241.7	0	17534.5	61707.3	0	0	0	0	0	0	0	0	3.20295	6.79705	0	0	0	0	0	0	0	0	5474.48	9078.53	0	0	0	0	0	0	0
240	Cilegon	Indonesia	South-Eastern Asia	4.47053e+07	10593367	-743189	Asia	129741	0	0	0	0	0	0	30038.8	99702.3	0	0	0	0	0	0	0	0	14.9247	30.0753	0	0	0	0	0	0	0	0	2012.69	3315.09	0	0
458	Iligan	Philippines	South-Eastern Asia	2.38459e+07	12373250	1016083	Asia	90639.4	0	0	0	90639.4	0	0	0	0	0	0	0	0	0	24	0	0	0	0	0	0	0	0	0	3776.64	0	0	0	0	0	0
728	Mexico City	Mexico	Central America	1.79956e+09	-9579354	2387700	North America	13384581	0	0	0	193945	1647125	2372756	4139032	3.9825e+06	1.04648e+06	2747.71	0	0	0	66.1577	324.626	313.048	477.437	441.669	184.58	1.48307	0	0	0	2931.56	5073.92	7579.54	8669.28	9016.92	5669.52	1852.72
52	Amol	Iran	Southern Asia	2.19565e+07	4583727	4390955	Asia	62248.2	0	0	0	55298.4	6949.79	0	0	0	0	0	0	0	0	19.4737	2.52627	0	0	0	0	0	0	0	0	2839.64	2751.01	0	0	0	0	0
1122	Tengchong	China	Eastern Asia	1.49353e+07	9287633	3056433	Asia	85610.2	0	0	0	0	0	0	0	85610.2	0	0	0	0	0	0	0	0	0	15	0	0	0	0	0	0	0	0	0	5707.35	0	0
861	Pandeglang	Indonesia	South-Eastern Asia	1.98693e+07	10594450	-779800	Asia	159270	0	0	0	0	0	0	0	0	284.438	158985	0	0	0	0	0	0	0	0	0.63213	19.3679	0	0	0	0	0	0	0	0	449.967	8208.7
895	Phyongsan	North Korea	Eastern Asia	1.09828e+07	10896136	4601955	Asia	70982.2	0	51461.1	19521.1	0	0	0	0	0	0	0	0	7.11222	3.88778	0	0	0	0	0	0	0	0	7235.6	5021.15	0	0	0	0	0	0	0
823	Okaya	Japan	Eastern Asia	2.49483e+07	12125420	4345500	Asia	82596.8	0	0	0	0	0	0	0	82529.6	67.1536	0	0	0	0	0	0	0	0	24.3111	0.688901	0	0	0	0	0	0	0	0	3394.73	97.4793	0
1241	Yirga Cheffe	Ethiopia	Eastern Africa	3.97383e+06	3815000	761000	Africa	69907.3	0	0	69907.3	0	0	0	0	0	0	0	0	0	3.99952	0.000483288	0	0	0	0	0	0	0	0	17478.9	0	0	0	0	0	0	0
1078	Tacloban	Philippines	South-Eastern Asia	2.98143e+07	12379800	1384700	Asia	103123	0	0	0	60221.6	42901.1	0	0	0	0	0	0	0	0	18.9372	11.0628	0	0	0	0	0	0	0	0	3180.06	3877.98	0	0	0	0	0
482	Jakarta	Indonesia	South-Eastern Asia	2.43201e+09	10667413	-782717	Asia	14017204	0	0	207641	3357431	4.48115e+06	2047142	1.04224e+06	686102	1.99048e+06	205019	0	0	56.652	520.907	732.364	403.834	229.977	137.478	324.085	42.7028	0	0	3665.2	6445.36	6118.75	5069.26	4531.9	4990.63	6141.86	4801.07
1073	Suwa	Japan	Eastern Asia	3.19334e+07	12137500	4339000	Asia	84283.5	0	0	0	0	0	0	0	9926.95	74356.6	0	0	0	0	0	0	0	0	5.93173	26.0683	0	0	0	0	0	0	0	0	1673.53	2852.38	0
686	Marawi	Philippines	South-Eastern Asia	8.74335e+07	12385500	987545	Asia	332832	0	0	0	0	0	112610	220222	0	0	0	0	0	0	0	0	30.3944	57.6056	0	0	0	0	0	0	0	0	3704.98	3822.92	0	0	0
555	Kibet	Ethiopia	Eastern Africa	3.97426e+06	3818000	991000	Africa	57218.8	0	0	0	0	0	0	0	0	0	57218.8	0	0	0	0	0	0	0	0	0	4	0	0	0	0	0	0	0	0	0	14304.7
939	Rangkasbitung	Indonesia	South-Eastern Asia	1.4902e+07	10608633	-785100	Asia	204181	0	0	0	0	0	0	0	204181	0	0	0	0	0	0	0	0	0	15	0	0	0	0	0	0	0	0	0	13612.1	0	0
1017	Sendai	Japan	Eastern Asia	2.42618e+08	12153179	4595418	Asia	876193	0	0	0	0	129719	507190	239283	0	0	0	0	0	0	0	53.253	130.075	59.6722	0	0	0	0	0	0	0	2435.91	3899.22	4009.96	0	0	0
261	Cotabato City	Philippines	South-Eastern Asia	1.98703e+07	12391000	891700	Asia	147023	0	0	0	0	6876.08	140147	0	0	0	0	0	0	0	0	1.34079	18.6592	0	0	0	0	0	0	0	0	5128.39	7510.86	0	0	0	0
1223	Wonsan	North Korea	Eastern Asia	3.19561e+07	10907219	4694500	Asia	289096	286076	3020.45	0	0	0	0	0	0	0	0	29.8739	2.12607	0	0	0	0	0	0	0	0	9576.09	1420.68	0	0	0	0	0	0	0	0
462	Inter-nishi	Japan	Eastern Asia	2.89493e+07	12147224	4507534	Asia	126497	0	0	0	0	0	0	0	7460.61	119037	0	0	0	0	0	0	0	0	3.82906	25.1709	0	0	0	0	0	0	0	0	1948.42	4729.13	0
195	Cagayan de Oro	Philippines	South-Eastern Asia	5.26606e+07	12407066	1048481	Asia	164509	0	37091.4	127418	0	0	0	0	0	0	0	0	8.90466	44.0953	0	0	0	0	0	0	0	0	4165.4	2889.59	0	0	0	0	0	0	0
530	Kayseri	Turkey	Western Asia	4.69312e+07	3050755	4648649	Asia	167417	0	0	0	0	0	0	32748.2	129568	5100.83	0	0	0	0	0	0	0	7.35864	37.6549	1.9865	0	0	0	0	0	0	0	4450.31	3440.94	2567.75	0
107	Babol	Iran	Southern Asia	1.89627e+07	4608921	4399921	Asia	68564.4	0	68564.4	0	0	0	0	0	0	0	0	0	19	0	0	0	0	0	0	0	0	0	3608.65	0	0	0	0	0	0	0	0
854	Palabuhanratu	Indonesia	South-Eastern Asia	2.28506e+07	10630935	-864935	Asia	127302	0	0	0	0	0	0	49062.3	78240.1	0	0	0	0	0	0	0	0	15.0023	7.99769	0	0	0	0	0	0	0	0	3270.32	9782.83	0	0
456	Iida	Japan	Eastern Asia	2.89364e+07	12158293	4281534	Asia	91728.9	0	0	0	0	91728.9	0	0	0	0	0	0	0	0	0	29	0	0	0	0	0	0	0	0	0	3163.06	0	0	0	0	0
846	Paechon	North Korea	Eastern Asia	4.99182e+06	10919100	4563700	Asia	86741.6	86741.6	0	0	0	0	0	0	0	0	0	5	0	0	0	0	0	0	0	0	0	17348.3	0	0	0	0	0	0	0	0	0
300	Dilla	Ethiopia	Eastern Africa	1.09282e+07	3824591	792409	Africa	59191.5	0	0	0	0	59191.5	0	0	0	0	0	0	0	0	0	11	0	0	0	0	0	0	0	0	0	5381.05	0	0	0	0	0
586	Kosan	North Korea	Eastern Asia	5.99137e+06	10933167	4661333	Asia	72146.9	0	0	0	285.055	71861.8	0	0	0	0	0	0	0	0	0.869293	5.13071	0	0	0	0	0	0	0	0	327.915	14006.2	0	0	0	0	0
352	Fukushima	Japan	Eastern Asia	4.89174e+07	12165582	4539112	Asia	112390	0	0	0	0	0	0	0	49229.7	63160.6	0	0	0	0	0	0	0	0	23.6427	25.3573	0	0	0	0	0	0	0	0	2082.24	2490.82	0
926	Qaem Shahr	Iran	Southern Asia	1.89624e+07	4627974	4390974	Asia	56514.8	11570.9	44943.9	0	0	0	0	0	0	0	0	4.72291	14.2771	0	0	0	0	0	0	0	0	2449.95	3147.97	0	0	0	0	0	0	0	0
241	Cipanas	Indonesia	South-Eastern Asia	5.66288e+07	10683061	-831939	Asia	470032	0	0	0	0	0	0	0	0	116608	353424	0	0	0	0	0	0	0	0	23.855	33.145	0	0	0	0	0	0	0	0	4888.21	10663
506	Kaesong	North Korea	Eastern Asia	1.3977e+07	10942286	4561929	Asia	205292	0	3242.61	202049	0	0	0	0	0	0	0	0	1.2834	12.7166	0	0	0	0	0	0	0	0	2526.58	15888.6	0	0	0	0	0	0	0
470	Ishinomaki	Japan	Eastern Asia	2.596e+07	12168192	4612808	Asia	65495.9	0	0	0	8463.35	57032.5	0	0	0	0	0	0	0	0	4.20629	21.7937	0	0	0	0	0	0	0	0	2012.07	2616.93	0	0	0	0	0
135	Baoshan	China	Eastern Asia	1.49356e+07	9346300	3067900	Asia	67327.8	0	0	251.141	67076.6	0	0	0	0	0	0	0	0	0.307909	14.6921	0	0	0	0	0	0	0	0	815.632	4565.49	0	0	0	0	0	0
1088	Takasaki [Maebashi]	Japan	Eastern Asia	1.52693e+08	12183310	4378350	Asia	489674	0	0	0	0	0	0	0	356003	133670	0	0	0	0	0	0	0	0	98.6487	54.3513	0	0	0	0	0	0	0	0	3608.8	2459.38	0
1128	Texcoco de Mora	Mexico	Central America	2.68594e+07	-9555167	2396944	North America	58770.4	0	0	0	0	9536.56	49233.8	0	0	0	0	0	0	0	0	3.87584	23.1242	0	0	0	0	0	0	0	0	2460.51	2129.11	0	0	0	0
233	Chucko	Ethiopia	Eastern Africa	3.97392e+06	3826500	813750	Africa	66596	0	0	0	0	0	66596	0	0	0	0	0	0	0	0	0	4	0	0	0	0	0	0	0	0	0	16649	0	0	0	0
465	Irba	Ethiopia	Eastern Africa	4.9675e+06	3828100	855700	Africa	61001.6	0	0	0	0	0	0	6197.63	54803.9	0	0	0	0	0	0	0	0	1.3247	3.6753	0	0	0	0	0	0	0	0	4678.51	14911.4	0	0
584	Koriyama	Japan	Eastern Asia	4.49203e+07	12195700	4496056	Asia	133829	0	0	0	0	0	0	42123.7	91705.4	0	0	0	0	0	0	0	0	14.9164	30.0836	0	0	0	0	0	0	0	0	2823.98	3048.35	0	0
122	Bandung	Indonesia	South-Eastern Asia	5.5934e+08	10738141	-855402	Asia	3.9054e+06	0	0	0	0	0	0	0	1.04701e+06	2.63073e+06	227664	0	0	0	0	0	0	0	229.339	276.709	56.9522	0	0	0	0	0	0	0	4565.34	9507.21	3997.45
469	Isesaki	Japan	Eastern Asia	8.38319e+07	12201952	4379500	Asia	232241	0	0	0	0	0	0	4962.22	182990	44288.6	0	0	0	0	0	0	0	2.84816	63.3973	17.7546	0	0	0	0	0	0	0	1742.25	2886.4	2494.49	0
466	Irgalem	Ethiopia	Eastern Africa	8.9414e+06	3833611	833611	Africa	104249	0	0	0	0	0	104249	0	0	0	0	0	0	0	0	0.161287	8.83871	0	0	0	0	0	0	0	0	0	11794.6	0	0	0	0
919	Purwakarta	Indonesia	South-Eastern Asia	4.07326e+07	10724744	-808451	Asia	213050	0	0	0	0	0	0	132651	80399.1	0	0	0	0	0	0	0	0	27.734	13.266	0	0	0	0	0	0	0	0	4782.96	6060.53	0	0
578	Kofu	Japan	Eastern Asia	1.4768e+08	12209770	4297527	Asia	411220	0	0	0	0	0	30137	381083	0	0	0	0	0	0	0	0	11.3644	136.636	0	0	0	0	0	0	0	0	2651.87	2789.05	0	0	0
191	Butuan	Philippines	South-Eastern Asia	2.18598e+07	12487818	1106273	Asia	73699.1	48737.5	0	0	0	0	0	0	0	0	0	12.3498	0	0	0	0	0	0	0	0	0	3946.42	0	0	0	0	0	0	0	0	0
45	Aleta Wendo	Ethiopia	Eastern Africa	3.97393e+06	3835000	816000	Africa	82206.1	0	0	0	0	82206.1	0	0	0	0	0	0	0	0	0	4	0	0	0	0	0	0	0	0	0	20551.5	0	0	0	0	0
841	Pachuca	Mexico	Central America	2.4872e+07	-9519020	2467260	North America	52130	4.14232	0	0	0	0	0	0	0	0	0	0.0122432	0	0	0	0	0	0	0	0	0	338.335	0	0	0	0	0	0	0	0	0
620	Leku	Ethiopia	Eastern Africa	4.96748e+06	3836100	849300	Africa	95094.4	0	0	0	0	0	0	95094.4	0	0	0	0	0	0	0	0	0	5	0	0	0	0	0	0	0	0	0	19018.9	0	0	0
835	Ota	Japan	Eastern Asia	1.06784e+08	12221407	4371509	Asia	266303	0	0	0	0	0	7444.08	257256	1603.31	0	0	0	0	0	0	0	3.99437	102.163	0.842681	0	0	0	0	0	0	0	1863.64	2518.09	1902.63	0	0
367	General Santos	Philippines	South-Eastern Asia	4.96728e+07	12499720	754400	Asia	155594	0	0	0	0	0	0	20661	134933	0	0	0	0	0	0	0	0	8.31244	41.6876	0	0	0	0	0	0	0	0	2485.55	3236.77	0	0
1129	Texmelucan	Mexico	Central America	1.79057e+07	-9520833	2367833	North America	67035.5	0	0	0	0	0	0	0	67035.5	0	0	0	0	0	0	0	0	0	18	0	0	0	0	0	0	0	0	0	3724.2	0	0
412	Hawassa	Ethiopia	Eastern Africa	1.98701e+07	3838450	872300	Africa	94792.9	0	0	0	0	0	0	0	183.305	94609.6	0	0	0	0	0	0	0	0	0.15534	19.8447	0	0	0	0	0	0	0	0	1180.02	4767.51	0
1100	Tarogong	Indonesia	South-Eastern Asia	9.93514e+07	10764540	-888930	Asia	612029	0	0	0	0	0	0	0	0	337459	274570	0	0	0	0	0	0	0	0	52.1758	47.8242	0	0	0	0	0	0	0	0	6467.74	5741.23
348	Fukaya	Japan	Eastern Asia	2.99387e+07	12223633	4358100	Asia	87529.3	0	0	0	0	0	87510.3	18.9672	0	0	0	0	0	0	0	0	29.9731	0.0269467	0	0	0	0	0	0	0	0	2919.63	703.877	0	0	0
913	Puebla	Mexico	Central America	2.02923e+08	-9506392	2337216	North America	700959	0	0	0	0	0	0	263763	425306	11889.7	0	0	0	0	0	0	0	81.7486	116.936	5.31489	0	0	0	0	0	0	0	3226.52	3637.07	2237.05	0
16	Addis Ababa	Ethiopia	Eastern Africa	1.8879e+08	3854584	1112347	Africa	1.13917e+06	0	0	0	0	0	225683	876377	37105.8	0	0	0	0	0	0	0	33.3696	141.361	15.2696	0	0	0	0	0	0	0	6763.14	6199.58	2430.04	0	0
929	Quang Ngãi	Vietnam	South-Eastern Asia	1.19305e+07	10669083	1860667	Asia	62997.9	0	0	0	0	0	62997.9	0	0	0	0	0	0	0	0	0	12	0	0	0	0	0	0	0	0	0	5249.82	0	0	0	0
1058	Subang	Indonesia	South-Eastern Asia	1.39087e+07	10756500	-811071	Asia	101081	0	0	0	0	0	0	17715.6	83365.1	0	0	0	0	0	0	0	0	1.82944	12.1706	0	0	0	0	0	0	0	0	9683.65	6849.74	0	0
1186	Utsunomiya	Japan	Eastern Asia	8.38353e+07	12238571	4400202	Asia	211877	0	0	0	0	0	104156	107721	0	0	0	0	0	0	0	0	41.8169	42.1831	0	0	0	0	0	0	0	0	2490.77	2553.65	0	0	0
278	Davao City	Philippines	South-Eastern Asia	1.04318e+08	12529529	876357	Asia	365629	0	0	0	135414	197520	32695.7	0	0	0	0	0	0	0	37.9301	55.8579	11.2121	0	0	0	0	0	0	0	3570.09	3536.11	2916.11	0	0	0	0
417	Hegarsari	Indonesia	South-Eastern Asia	2.48377e+07	10762260	-876140	Asia	122331	0	0	0	0	0	0	0	0	8980.93	113350	0	0	0	0	0	0	0	0	3.63613	21.3639	0	0	0	0	0	0	0	0	2469.92	5305.68
592	Kumagaya	Japan	Eastern Asia	1.79631e+07	12233278	4354667	Asia	64661.8	0	0	0	0	8163.81	56498	0	0	0	0	0	0	0	0	2.44957	15.5504	0	0	0	0	0	0	0	0	3332.75	3633.21	0	0	0	0
991	Sano	Japan	Eastern Asia	1.69658e+07	12235265	4373265	Asia	55455.5	0	0	0	0	0	55455.5	0	0	0	0	0	0	0	0	0	17	0	0	0	0	0	0	0	0	0	3262.09	0	0	0	0
219	Cherkessk	Russia	Eastern Europe	2.19958e+07	3425682	5255909	Europe	82370.3	9384.2	0	0	0	0	0	0	0	0	0	3.49999	0	0	0	0	0	0	0	0	0	2681.21	0	0	0	0	0	0	0	0	0
19	Agre Salam	Ethiopia	Eastern Africa	2.98043e+06	3845500	801500	Africa	50706.6	0	0	0	50706.6	0	0	0	0	0	0	0	0	0	3	0	0	0	0	0	0	0	0	0	16902.2	0	0	0	0	0	0
1065	Sumedang	Indonesia	South-Eastern Asia	1.98699e+07	10768550	-845350	Asia	116929	0	0	0	0	0	0	0	0	58354.9	58574.4	0	0	0	0	0	0	0	0	9.59744	10.4026	0	0	0	0	0	0	0	0	6080.26	5630.77
1140	Tokyo	Japan	Eastern Asia	4.65294e+09	12303596	4299597	Asia	25808954	3057448	4312647	5188513	4171874	3.44497e+06	1.70412e+06	608632	216413	200102	20.8663	503.011	641.107	831.749	697.668	649.873	353.039	156.661	79.3693	66.5927	0.0723551	6078.3	6726.87	6238.08	5979.74	5300.98	4827.01	3885.02	2726.66	3004.87	288.387
1139	Tochigi	Japan	Eastern Asia	1.7964e+07	12241222	4381611	Asia	56999.5	0	0	0	0	0	56999.5	0	0	0	0	0	0	0	0	0	18	0	0	0	0	0	0	0	0	0	3166.64	0	0	0	0
65	Apizaco	Mexico	Central America	1.59164e+07	-9487062	2382812	North America	53650.2	0	0	0	0	0	0	0	53650.2	0	0	0	0	0	0	0	0	0	16	0	0	0	0	0	0	0	0	0	3353.14	0	0
1024	Shashamane	Ethiopia	Eastern Africa	2.18573e+07	3849545	889864	Africa	78910.1	0	0	0	0	0	0	0	78910.1	0	0	0	0	0	0	0	0	0	22	0	0	0	0	0	0	0	0	0	3586.82	0	0
1102	Tasikmalaya	Indonesia	South-Eastern Asia	2.59309e+08	10789837	-899646	Asia	1229300	0	0	0	0	0	0	246743	240085	673472	68999.4	0	0	0	0	0	0	22.8566	50.5593	162.788	24.7964	0	0	0	0	0	0	10795.3	4748.58	4137.12	2782.64
345	Fujieda	Japan	Eastern Asia	8.77944e+07	12258011	4206557	Asia	183398	0	3063.81	81828	98506.5	0	0	0	0	0	0	0	1.25993	38.8766	47.8635	0	0	0	0	0	0	0	2431.74	2104.81	2058.07	0	0	0	0	0	0
344	Fuji	Japan	Eastern Asia	8.87985e+07	12262006	4244433	Asia	245206	0	0	0	0	0	0	0	128855	116351	0	0	0	0	0	0	0	0	53.4807	35.5193	0	0	0	0	0	0	0	0	2409.37	3275.71	0
838	Oyama	Japan	Eastern Asia	2.49496e+07	12255660	4371820	Asia	93230	0	0	0	12197.2	81032.8	0	0	0	0	0	0	0	0	4.69766	20.3023	0	0	0	0	0	0	0	0	2596.44	3991.31	0	0	0	0	0
1029	Shizuoka	Japan	Eastern Asia	1.38679e+08	12260788	4221888	Asia	426553	0	0	0	0	213477	213070	6.54224	0	0	0	0	0	0	0	61.8729	76.9469	0.180245	0	0	0	0	0	0	0	3450.25	2769.05	36.2965	0	0	0
88	Arsi Negelle	Ethiopia	Eastern Africa	7.94819e+06	3856250	908250	Africa	81910.9	0	0	0	0	0	0	0	0	81910.9	0	0	0	0	0	0	0	0	0	8	0	0	0	0	0	0	0	0	0	10238.9	0
505	Kadipaten	Indonesia	South-Eastern Asia	4.37135e+07	10799886	-833182	Asia	179264	0	0	0	0	0	0	0	179264	0	0	0	0	0	0	0	0	0	44	0	0	0	0	0	0	0	0	0	4074.17	0	0
666	Majalengka	Indonesia	South-Eastern Asia	1.09284e+07	10799409	-844318	Asia	63188.4	0	0	0	0	0	0	0	41867.7	21320.7	0	0	0	0	0	0	0	0	6.50067	4.49933	0	0	0	0	0	0	0	0	6440.52	4738.64	0
816	Numazu	Japan	Eastern Asia	1.14738e+08	12288578	4237013	Asia	406250	0	0	0	0	0	0	0	85724.4	315471	5054.82	0	0	0	0	0	0	0	35.0663	77.5087	2.42494	0	0	0	0	0	0	0	2444.64	4070.13	2084.51
564	Kislovodsk	Russia	Eastern Europe	2.19942e+07	3490773	5222364	Europe	99515.4	0	0	576.305	98939.1	0	0	0	0	0	0	0	0	0.711418	21.2886	0	0	0	0	0	0	0	0	810.079	4647.52	0	0	0	0	0	0
1115	Tehuacán	Mexico	Central America	2.88446e+07	-9447810	2267052	North America	73672.7	0	0	0	73672.7	0	0	0	0	0	0	0	0	0	29	0	0	0	0	0	0	0	0	0	2540.44	0	0	0	0	0	0
1238	Yessentuki	Russia	Eastern Europe	2.29946e+07	3498196	5235848	Europe	83417.8	0	83417.8	0	0	0	0	0	0	0	0	0	23	0	0	0	0	0	0	0	0	0	3626.86	0	0	0	0	0	0	0	0
461	Indramayu	Indonesia	South-Eastern Asia	4.07322e+07	10814329	-785207	Asia	160471	0	0	0	104594	55877.3	0	0	0	0	0	0	0	0	18.5422	22.4578	0	0	0	0	0	0	0	0	5640.88	2488.1	0	0	0	0	0
427	Hitachi	Japan	Eastern Asia	5.68884e+07	12303079	4402254	Asia	131645	0	131645	0	0	0	0	0	0	0	0	0	57	0	0	0	0	0	0	0	0	0	2309.57	0	0	0	0	0	0	0	0
923	Pyatigorsk	Russia	Eastern Europe	3.09926e+07	3514887	5235210	Europe	144829	123814	21014.3	0	0	0	0	0	0	0	0	24.1072	6.89283	0	0	0	0	0	0	0	0	5136	3048.72	0	0	0	0	0	0	0	0
746	Mito	Japan	Eastern Asia	4.19159e+07	12305929	4379714	Asia	98355.4	0	98102.8	252.572	0	0	0	0	0	0	0	0	41.8472	0.152816	0	0	0	0	0	0	0	0	2344.31	1652.79	0	0	0	0	0	0	0
486	Jatibarang	Indonesia	South-Eastern Asia	1.49021e+07	10812633	-799700	Asia	63442.3	0	0	0	0	140.375	63302	0	0	0	0	0	0	0	0	0.239426	14.7606	0	0	0	0	0	0	0	0	586.299	4288.58	0	0	0	0
1156	Tsukuba	Japan	Eastern Asia	2.49483e+07	12305180	4346180	Asia	61564.1	61564.1	0	0	0	0	0	0	0	0	0	25	0	0	0	0	0	0	0	0	0	2462.56	0	0	0	0	0	0	0	0	0
718	Meki	Ethiopia	Eastern Africa	6.95501e+06	3866500	1006500	Africa	53102	0	0	0	0	0	0	13569.5	39532.5	0	0	0	0	0	0	0	0	2.12713	4.87287	0	0	0	0	0	0	0	0	6379.24	8112.78	0	0
539	Kefole	Ethiopia	Eastern Africa	3.97403e+06	3869000	874000	Africa	58525.8	0	0	0	0	0	58525.8	0	0	0	0	0	0	0	0	0	4	0	0	0	0	0	0	0	0	0	14631.4	0	0	0	0
242	Cirebon	Indonesia	South-Eastern Asia	1.83795e+08	10830197	-829019	Asia	908489	0	0	0	0	0	0	60065.7	804393	44030.3	0	0	0	0	0	0	0	14.8116	149.079	21.1094	0	0	0	0	0	0	0	4055.33	5395.75	2085.81	0
1155	Tsuchiura	Japan	Eastern Asia	4.29109e+07	12313895	4344081	Asia	113245	56608.7	0	0	0	0	0	0	0	0	0	17.1809	0	0	0	0	0	0	0	0	0	3294.87	0	0	0	0	0	0	0	0	0
830	Orizaba	Mexico	Central America	2.78515e+07	-9405893	2314821	North America	91990.8	0	0	0	0	0	0	185.75	91805.1	0	0	0	0	0	0	0	0	0.217086	27.7829	0	0	0	0	0	0	0	0	855.653	3304.37	0	0
163	Bishoftu	Ethiopia	Eastern Africa	2.28531e+07	3876978	1080326	Africa	68483.7	0	0	0	0	0	0	0	0	0	68483.7	0	0	0	0	0	0	0	0	0	23	0	0	0	0	0	0	0	0	0	2977.55
596	Kuningan	Indonesia	South-Eastern Asia	9.63695e+07	10823582	-857180	Asia	321190	0	0	0	0	0	0	0	0	210246	110943	0	0	0	0	0	0	0	0	55.016	41.984	0	0	0	0	0	0	0	0	3821.55	2642.52
128	Banjar	Indonesia	South-Eastern Asia	1.49029e+07	10822300	-910567	Asia	91547.7	0	0	0	0	91547.7	0	0	0	0	0	0	0	0	0	15	0	0	0	0	0	0	0	0	0	6103.18	0	0	0	0	0
562	Kisarazu	Japan	Eastern Asia	5.08865e+07	12354794	4264245	Asia	133298	0	82577.3	50720.8	0	0	0	0	0	0	0	0	28.0496	22.9504	0	0	0	0	0	0	0	0	2943.97	2210.02	0	0	0	0	0	0	0
178	Bonsa Bota	Ethiopia	Eastern Africa	4.96739e+06	3876100	806300	Africa	83784.8	0	83784.8	0	0	0	0	0	0	0	0	0	5	0	0	0	0	0	0	0	0	0	16757	0	0	0	0	0	0	0	0
862	Pangandaran	Indonesia	South-Eastern Asia	7.94835e+06	10829250	-949750	Asia	51814.5	0	0	51814.5	0	0	0	0	0	0	0	0	0.0534819	7.94652	0	0	0	0	0	0	0	0	0	6520.41	0	0	0	0	0	0	0
132	Banjarsari	Indonesia	South-Eastern Asia	6.95472e+06	10827786	-924500	Asia	57000.5	0	0	0	57000.5	0	0	0	0	0	0	0	0	0	7	0	0	0	0	0	0	0	0	0	8142.93	0	0	0	0	0	0
1130	Teziutlán	Mexico	Central America	1.98967e+07	-9397450	2431300	North America	62325.9	0	0	0	0	0	0	0	1535.1	60790.8	0	0	0	0	0	0	0	0	0.963097	19.0369	0	0	0	0	0	0	0	0	1593.92	3193.31	0
115	Baksan	Russia	Eastern Europe	1.69945e+07	3566912	5196382	Europe	61784.4	61784.4	0	0	0	0	0	0	0	0	0	17	0	0	0	0	0	0	0	0	0	3634.38	0	0	0	0	0	0	0	0	0
523	Karangwareng	Indonesia	South-Eastern Asia	1.39089e+07	10839786	-845643	Asia	55304.4	0	0	0	0	0	0	0	55304.4	0	0	0	0	0	0	0	0	0	14	0	0	0	0	0	0	0	0	0	3950.31	0	0
667	Majenang	Indonesia	South-Eastern Asia	9.9352e+06	10845300	-901600	Asia	98383	0	0	0	0	23304.6	75078.4	0	0	0	0	0	0	0	0	5.61316	4.38684	0	0	0	0	0	0	0	0	4151.77	17114.5	0	0	0	0
260	Córdoba	Mexico	Central America	2.18834e+07	-9389455	2319227	North America	62763.5	0	0	0	0	0	6047.6	56715.9	0	0	0	0	0	0	0	0	2.7854	19.2146	0	0	0	0	0	0	0	0	2171.18	2951.71	0	0	0
1203	Waled	Indonesia	South-Eastern Asia	4.07334e+07	10847695	-851305	Asia	138290	0	0	0	0	0	0	138290	0	0	0	0	0	0	0	0	0	41	0	0	0	0	0	0	0	0	0	3372.93	0	0	0
783	Nalchik	Russia	Eastern Europe	3.49873e+07	3580957	5176214	Europe	184184	162834	0	0	0	0	0	0	0	0	0	28.743	0	0	0	0	0	0	0	0	0	5665.16	0	0	0	0	0	0	0	0	0
645	Losari	Indonesia	South-Eastern Asia	2.98048e+07	10857800	-845067	Asia	120460	0	0	0	0	789.102	119671	0	0	0	0	0	0	0	0	1.06034	28.9397	0	0	0	0	0	0	0	0	744.197	4135.18	0	0	0	0
907	Poza Rica	Mexico	Central America	2.98483e+07	-9377900	2518133	North America	80453.1	80453.1	0	0	0	0	0	0	0	0	0	30	0	0	0	0	0	0	0	0	0	2681.77	0	0	0	0	0	0	0	0	0
547	Kersana	Indonesia	South-Eastern Asia	2.9805e+07	10862600	-854800	Asia	146605	0	0	0	0	58461.6	88143.1	0	0	0	0	0	0	0	0	13.1113	16.8887	0	0	0	0	0	0	0	0	4458.87	5219.06	0	0	0	0
934	Quiha	Ethiopia	Eastern Africa	4.97014e+06	3894900	1660300	Africa	69312.9	0	69312.9	0	0	0	0	0	0	0	0	0	5	0	0	0	0	0	0	0	0	0	13862.6	0	0	0	0	0	0	0	0
238	Cilacap	Indonesia	South-Eastern Asia	8.34577e+07	10868750	-949714	Asia	772006	0	0	0	41.625	671097	100867	0	0	0	0	0	0	0	1.12032	56.9506	25.9291	0	0	0	0	0	0	0	37.1547	11783.9	3890.1	0	0	0	0
575	Kluwut	Indonesia	South-Eastern Asia	1.09285e+07	10868773	-848955	Asia	67524.8	0	0	0	0	56133.6	11391.2	0	0	0	0	0	0	0	0	8.86451	2.13549	0	0	0	0	0	0	0	0	6332.4	5334.22	0	0	0	0
1228	Xalapa	Mexico	Central America	4.77502e+07	-9363750	2398562	North America	156832	0	0	0	0	0	0	0	144535	12297.1	0	0	0	0	0	0	0	0	43.458	4.54205	0	0	0	0	0	0	0	0	3325.86	2707.38	0
1047	Siverek	Turkey	Western Asia	7.98648e+06	3405875	4536750	Asia	78364.2	0	0	0	0	0	78364.2	0	0	0	0	0	0	0	0	0	8	0	0	0	0	0	0	0	0	0	9795.53	0	0	0	0
93	Asella	Ethiopia	Eastern Africa	1.29163e+07	3898654	982423	Africa	55413.5	0	0	0	0	0	0	0	0	26878.7	28534.7	0	0	0	0	0	0	0	0	7.17712	5.82288	0	0	0	0	0	0	0	0	3745.06	4900.45
850	Paguyangan	Indonesia	South-Eastern Asia	1.78833e+07	10871167	-897167	Asia	73069.6	0	0	0	0	0	0	0	69960.6	3109.06	0	0	0	0	0	0	0	0	16.7537	1.24635	0	0	0	0	0	0	0	0	4175.84	2494.54	0
499	Jubang	Indonesia	South-Eastern Asia	2.1857e+07	10872045	-859364	Asia	68773.3	0	0	0	0	0	44111.8	24661.6	0	0	0	0	0	0	0	0	12.8605	9.13955	0	0	0	0	0	0	0	0	3430.03	2698.33	0	0	0
689	Martínez de la Torre	Mexico	Central America	1.19385e+07	-9357667	2461750	North America	56200.5	0	0	0	0	56200.5	0	0	0	0	0	0	0	0	0	12	0	0	0	0	0	0	0	0	0	4683.37	0	0	0	0	0
15	Adama	Ethiopia	Eastern Africa	2.38464e+07	3909417	1054750	Africa	89055.3	0	0	0	0	0	0	0	0	89055.3	0	0	0	0	0	0	0	0	0	24	0	0	0	0	0	0	0	0	0	3710.64	0
1112	Tegalglagah	Indonesia	South-Eastern Asia	2.08635e+07	10874262	-853167	Asia	85092.3	0	0	0	0	0	85092.3	0	0	0	0	0	0	0	0	0	21	0	0	0	0	0	0	0	0	0	4052.01	0	0	0	0
1200	Viransehir	Turkey	Western Asia	6.98735e+06	3459357	4477929	Asia	61797.9	0	0	0	0	807.637	60990.3	0	0	0	0	0	0	0	0	0.690477	6.30952	0	0	0	0	0	0	0	0	1169.68	9666.38	0	0	0	0
1201	Vladikavkaz	Russia	Eastern Europe	5.69734e+07	3682675	5127851	Europe	293256	0	0	0	0	0	160230	133025	0	0	0	0	0	0	0	0	39.3656	17.6344	0	0	0	0	0	0	0	0	4070.32	7543.5	0	0	0
301	Diyarbakir	Turkey	Western Asia	2.19637e+07	3478227	4555909	Asia	172923	0	0	0	0	0	172923	0	0	0	0	0	0	0	0	0	22	0	0	0	0	0	0	0	0	0	7860.16	0	0	0	0
1111	Tegal	Indonesia	South-Eastern Asia	2.65264e+08	10886976	-855436	Asia	1.2164e+06	0	0	0	0	0.75	396479	664944	154978	0	0	0	0	0	0	0.000476827	85.9403	141.018	40.0416	0	0	0	0	0	0	1572.9	4613.43	4715.32	3870.42	0	0
303	Dodolla	Ethiopia	Eastern Africa	4.96751e+06	3909100	861700	Africa	59690.4	0	59690.4	0	0	0	0	0	0	0	0	0	5	0	0	0	0	0	0	0	0	0	11938.1	0	0	0	0	0	0	0	0
161	Binangun	Indonesia	South-Eastern Asia	7.94832e+06	10889625	-941875	Asia	56770.7	0	0	0	0	0	56770.7	0	0	0	0	0	0	0	0	0	8	0	0	0	0	0	0	0	0	0	7096.34	0	0	0	0
1193	Veracruz	Mexico	Central America	1.00469e+08	-9302262	2353441	North America	320426	1313.97	173737	145375	0	0	0	0	0	0	0	1.96296	55.418	43.619	0	0	0	0	0	0	0	669.38	3135.02	3332.84	0	0	0	0	0	0	0
1067	Sunzha	Russia	Eastern Europe	1.09955e+07	3703955	5156864	Europe	138491	0	137333	1157.7	0	0	0	0	0	0	0	0	10.6688	0.331193	0	0	0	0	0	0	0	0	12872.4	3495.55	0	0	0	0	0	0	0
92	Asassa	Ethiopia	Eastern Africa	5.96105e+06	3909667	877333	Africa	62931.1	0	57266.8	5664.28	0	0	0	0	0	0	0	0	4.51474	1.48526	0	0	0	0	0	0	0	0	12684.4	3813.66	0	0	0	0	0	0	0
921	Purwokerto	Indonesia	South-Eastern Asia	2.11621e+08	10896251	-913387	Asia	1.19711e+06	0	0	0	0	0	0	0	694044	491190	11880.9	0	0	0	0	0	0	0	100.296	109.053	3.65124	0	0	0	0	0	0	0	6919.94	4504.16	3253.93
0	Mandijara	Indonesia	South-Eastern Asia	9.9353e+06	10910500	-922300	Asia	62115.5	0	0	0	0	0	0	62115.5	0	0	0	0	0	0	0	0	0	10	0	0	0	0	0	0	0	0	0	6211.55	0	0	0
885	Pemalang	Indonesia	South-Eastern Asia	5.66294e+07	10914307	-852746	Asia	376056	0	0	0	0	0	347854	28202.5	0	0	0	0	0	0	0	0	48.424	8.576	0	0	0	0	0	0	0	0	7183.5	3288.54	0	0	0
378	Gombong	Indonesia	South-Eastern Asia	2.88126e+07	10916086	-939534	Asia	197699	0	0	0	0	192194	5504.82	0	0	0	0	0	0	0	0	26.9758	2.0242	0	0	0	0	0	0	0	0	7124.7	2719.51	0	0	0	0
1219	Woldia	Ethiopia	Eastern Africa	7.95092e+06	3916000	1458625	Africa	67010.5	0	0	56609.1	10401.4	0	0	0	0	0	0	0	0	5.73312	2.26688	0	0	0	0	0	0	0	0	9874.05	4588.4	0	0	0	0	0	0
577	Kobo	Ethiopia	Eastern Africa	7.95116e+06	3917375	1498625	Africa	86983.6	0	0	0	0	86983.6	0	0	0	0	0	0	0	0	0	8	0	0	0	0	0	0	0	0	0	10873	0	0	0	0	0
638	Loning	Indonesia	South-Eastern Asia	2.28504e+07	10922065	-851152	Asia	118535	0	0	0	0	44470.4	74064.4	0	0	0	0	0	0	0	0	5.90491	17.0951	0	0	0	0	0	0	0	0	7531.08	4332.5	0	0	0	0
768	Mus	Turkey	Western Asia	7.98828e+06	3564500	4648750	Asia	73651.2	0	0	0	73651.2	0	0	0	0	0	0	0	0	0	8	0	0	0	0	0	0	0	0	0	9206.4	0	0	0	0	0	0
722	Mersa	Ethiopia	Eastern Africa	7.9508e+06	3924000	1438500	Africa	62643.8	0	0	0	62643.8	0	0	0	0	0	0	0	0	0	8	0	0	0	0	0	0	0	0	0	7830.48	0	0	0	0	0	0
535	Kebumen	Indonesia	South-Eastern Asia	5.76255e+07	10930293	-947759	Asia	491277	0	0	0	0	490529	747.663	0	0	0	0	0	0	0	0	57.645	0.355001	0	0	0	0	0	0	0	0	8509.49	2106.09	0	0	0	0
884	Pekalongan	Indonesia	South-Eastern Asia	2.02674e+08	10937206	-852931	Asia	1.01865e+06	0	0	0	0	145332	434464	438852	0	0	0	0	0	0	0	36.4631	103.942	63.5948	0	0	0	0	0	0	0	3985.73	4179.86	6900.75	0	0	0
295	Dessie	Ethiopia	Eastern Africa	1.9876e+07	3926050	1373950	Africa	109620	45913	0	0	0	0	0	0	0	0	0	11.2031	0	0	0	0	0	0	0	0	0	4098.25	0	0	0	0	0	0	0	0	0
131	Banjarnegara	Indonesia	South-Eastern Asia	2.78187e+07	10936107	-913429	Asia	203190	0	0	0	0	0	0	67145.9	136045	0	0	0	0	0	0	0	0	16.1717	11.8283	0	0	0	0	0	0	0	0	4152.05	11501.7	0	0
283	Debre Birhan	Ethiopia	Eastern Africa	8.94313e+06	3926944	1194167	Africa	50066.3	0	0	50066.3	0	0	0	0	0	0	0	0	0	9	0	0	0	0	0	0	0	0	0	5562.92	0	0	0	0	0	0	0
1023	Shangdu	China	Eastern Asia	7.99348e+06	9502125	4963000	Asia	86741.8	0	0	0	0	0	0	86741.8	0	0	0	0	0	0	0	0	0	8	0	0	0	0	0	0	0	0	0	10842.7	0	0	0
601	Kutoarjo	Indonesia	South-Eastern Asia	1.29161e+07	10953500	-954115	Asia	160552	0	0	0	0	0	159713	839.222	0	0	0	0	0	0	0	0	12.0827	0.917255	0	0	0	0	0	0	0	0	13218.3	914.928	0	0	0
251	Coatzacoalcos	Mexico	Central America	4.6746e+07	-9173032	2228117	North America	97129.1	77592.5	19536.7	0	0	0	0	0	0	0	0	36.7757	10.2243	0	0	0	0	0	0	0	0	2109.89	1910.8	0	0	0	0	0	0	0	0
20	Agri	Turkey	Western Asia	7.99007e+06	3665500	4758000	Asia	52409.1	0	52407.2	1.92035	0	0	0	0	0	0	0	0	7.99867	0.00132805	0	0	0	0	0	0	0	0	6551.98	1446	0	0	0	0	0	0	0
582	Kombolcha	Ethiopia	Eastern Africa	1.78883e+07	3935778	1366833	Africa	123443	118360	0	0	0	0	0	0	0	0	0	15.6516	0	0	0	0	0	0	0	0	0	7562.19	0	0	0	0	0	0	0	0	0
881	Patnos	Turkey	Western Asia	9.98647e+06	3665000	4703700	Asia	51102.7	0	51102.7	0	0	0	0	0	0	0	0	0	10	0	0	0	0	0	0	0	0	0	5110.27	0	0	0	0	0	0	0	0
712	Mehal Meda	Ethiopia	Eastern Africa	3.97493e+06	3935000	1272000	Africa	51786.7	51786.7	0	0	0	0	0	0	0	0	0	4	0	0	0	0	0	0	0	0	0	12946.7	0	0	0	0	0	0	0	0	0
437	Huade	China	Eastern Asia	5.99557e+06	9509667	4999833	Asia	71469	0	71466	3.08515	0	0	0	0	0	0	0	0	5.39709	0.602909	0	0	0	0	0	0	0	0	13241.6	5.1171	0	0	0	0	0	0	0
1222	Wonosobo	Indonesia	South-Eastern Asia	5.66309e+07	10961991	-909851	Asia	306562	0	0	0	0	0	0	0	0	232395	74167.4	0	0	0	0	0	0	0	0	31.0331	25.9669	0	0	0	0	0	0	0	0	7488.61	2856.23
1170	Tuxtla Gutiérrez	Mexico	Central America	6.16536e+07	-9085403	2060710	North America	114404	0	0	15750.2	98654	0	0	0	0	0	0	0	0	8.98233	53.0177	0	0	0	0	0	0	0	0	1753.46	1860.78	0	0	0	0	0	0
922	Purworejo	Indonesia	South-Eastern Asia	2.58322e+07	10961654	-953154	Asia	283043	0	0	0	0	0	653.094	282390	0	0	0	0	0	0	0	0	0.787964	25.212	0	0	0	0	0	0	0	0	828.838	11200.6	0	0	0
1206	Wates	Indonesia	South-Eastern Asia	1.09291e+07	10976409	-970773	Asia	134268	0	0	0	0	202.438	134066	0	0	0	0	0	0	0	0	0.336577	10.6634	0	0	0	0	0	0	0	0	601.461	12572.5	0	0	0	0
1098	Tapachula	Mexico	Central America	3.57907e+07	-9054222	1834333	North America	119626	0	0	0	0	0	0	77179.8	42446.3	0	0	0	0	0	0	0	0	22.2125	13.7875	0	0	0	0	0	0	0	0	3474.61	3078.61	0	0
870	Parakan	Indonesia	South-Eastern Asia	2.78185e+07	10976321	-899893	Asia	124325	0	0	0	0	0	0	0	0	54960.9	69364.2	0	0	0	0	0	0	0	0	8.62615	19.3738	0	0	0	0	0	0	0	0	6371.43	3580.3
1014	Semarang	Indonesia	South-Eastern Asia	3.91441e+08	11010000	-867629	Asia	1.9321e+06	0	0	0	0	624270	851837	336692	119297	0	0	0	0	0	0	117.952	164.916	71.3301	39.8021	0	0	0	0	0	0	5292.57	5165.29	4720.19	2997.26	0	0
975	San Cristóbal de las Casas	Mexico	Central America	2.38658e+07	-9039833	2057750	North America	89724	89723.4	0.558257	0	0	0	0	0	0	0	0	23.9892	0.010805	0	0	0	0	0	0	0	0	3740.16	51.6664	0	0	0	0	0	0	0	0
1191	Van	Turkey	Western Asia	2.6959e+07	3733574	4622204	Asia	110540	12151	0	0	0	0	0	0	0	0	0	6.40159	0	0	0	0	0	0	0	0	0	1898.12	0	0	0	0	0	0	0	0	0
1179	Ulanqab	China	Eastern Asia	3.2969e+07	9514409	4904045	Asia	344565	0	0	0	338633	5931.42	0	0	0	0	0	0	0	0	31.2133	1.78669	0	0	0	0	0	0	0	0	10849	3319.78	0	0	0	0	0
1117	Temanggung	Indonesia	South-Eastern Asia	1.78834e+07	10986778	-903722	Asia	134756	0	0	0	0	0	0	0	0	134756	0	0	0	0	0	0	0	0	0	18	0	0	0	0	0	0	0	0	0	7486.44	0
663	Magelang	Indonesia	South-Eastern Asia	3.77542e+07	10988421	-924842	Asia	404708	0	0	0	0	0	0	0	183179	221529	0	0	0	0	0	0	0	0	20.7546	17.2454	0	0	0	0	0	0	0	0	8825.94	12845.7	0
766	Muntilan	Indonesia	South-Eastern Asia	2.88126e+07	10992948	-936397	Asia	141808	0	0	0	0	0	0	0	26539.2	115269	0	0	0	0	0	0	0	0	9.34232	19.6577	0	0	0	0	0	0	0	0	2840.75	5863.82	0
187	Busisi	Dem. Rep. Congo	Middle Africa	5.9599e+06	2907833	-210333	Africa	83200.5	0	0	0	0	0	0	83200.5	0	0	0	0	0	0	0	0	0	6	0	0	0	0	0	0	0	0	0	13866.7	0	0	0
1242	Yogyakarta	Indonesia	South-Eastern Asia	4.36168e+08	11009147	-959072	Asia	1.96352e+06	0	0	0	0	0	42363.1	726950	1.18429e+06	9919.06	0	0	0	0	0	0	13.6254	163.7	258.03	3.64451	0	0	0	0	0	0	3109.14	4440.75	4589.73	2721.65	0
50	Ambarawa	Indonesia	South-Eastern Asia	1.88768e+07	11011079	-896289	Asia	88079.1	0	0	0	0	0	0	0	87966.5	112.647	0	0	0	0	0	0	0	0	18.9154	0.084563	0	0	0	0	0	0	0	0	4650.51	1332.1	0
965	Salatiga	Indonesia	South-Eastern Asia	2.2851e+07	11018630	-905674	Asia	133231	0	0	0	0	0	0	0	0	133231	0	0	0	0	0	0	0	0	0	23	0	0	0	0	0	0	0	0	0	5792.63	0
963	Sake	Dem. Rep. Congo	Middle Africa	6.95321e+06	2911500	-194500	Africa	103532	0	0	0	0	0	0	0	103532	0	0	0	0	0	0	0	0	0	7	0	0	0	0	0	0	0	0	0	14790.3	0	0
1221	Wonosari	Indonesia	South-Eastern Asia	1.68905e+07	11018206	-983206	Asia	138013	0	0	0	0	84193.3	53819.6	0	0	0	0	0	0	0	0	8.08092	8.91908	0	0	0	0	0	0	0	0	10418.8	6034.21	0	0	0	0
377	Goma	Dem. Rep. Congo	Middle Africa	4.17193e+07	2928095	-205119	Africa	208643	0	0	0	0	0	0	0	0.796875	208643	0	0	0	0	0	0	0	0	0.76594	41.2341	0	0	0	0	0	0	0	0	1.04039	5059.96	0
1070	Surakarta	Indonesia	South-Eastern Asia	3.15944e+08	11044947	-933796	Asia	1.36567e+06	0	0	0	0	0	295172	731770	195373	143355	0	0	0	0	0	0	45.8463	193.179	56.7742	22.2002	0	0	0	0	0	0	6438.28	3788.04	3441.22	6457.39	0
515	Kanyabayonga	Dem. Rep. Congo	Middle Africa	4.96654e+06	2923900	-86700	Africa	68736.2	0	0	68736.2	0	0	0	0	0	0	0	0	0	5	0	0	0	0	0	0	0	0	0	13747.2	0	0	0	0	0	0	0
291	Demak	Indonesia	South-Eastern Asia	9.93497e+06	11039400	-851400	Asia	82025.7	0	0	0	82025.7	0	0	0	0	0	0	0	0	0	10	0	0	0	0	0	0	0	0	0	8202.57	0	0	0	0	0	0
560	Kirumba	Dem. Rep. Congo	Middle Africa	7.94646e+06	2924625	-69375	Africa	56334.5	56334.5	0	0	0	0	0	0	0	0	0	8	0	0	0	0	0	0	0	0	0	7041.81	0	0	0	0	0	0	0	0	0
365	Gelemso	Ethiopia	Eastern Africa	4.96809e+06	4031300	1087900	Africa	54806.9	0	0	27265.3	27541.7	0	0	0	0	0	0	0	0	2.57821	2.42179	0	0	0	0	0	0	0	0	10575.3	11372.5	0	0	0	0	0	0
490	Jepara	Indonesia	South-Eastern Asia	8.94138e+07	11049522	-828256	Asia	458081	189053	252838	12816.1	0	0	0	0	0	0	0	30.828	55.255	2.745	0	0	0	0	0	0	0	6132.51	4575.84	4668.88	0	0	0	0	0	0	0
1061	Sukoharjo	Indonesia	South-Eastern Asia	1.58967e+07	11047312	-948062	Asia	73894.6	0	0	0	0	0	14492.5	59402.1	0	0	0	0	0	0	0	0	4.19622	11.8038	0	0	0	0	0	0	0	0	3453.7	5032.47	0	0	0
189	Butembo	Dem. Rep. Congo	Middle Africa	2.58259e+07	2936462	15269	Africa	73255.6	0	0	72652.1	603.427	0	0	0	0	0	0	0	0	25.5112	0.48876	0	0	0	0	0	0	0	0	2847.85	1234.61	0	0	0	0	0	0
150	Bekonang	Indonesia	South-Eastern Asia	2.28514e+07	11053457	-940065	Asia	72766.1	0	0	0	0	0	0	61117.5	11648.6	0	0	0	0	0	0	0	0	19.1477	3.85227	0	0	0	0	0	0	0	0	3191.89	3023.84	0	0
1220	Wonogiri	Indonesia	South-Eastern Asia	1.78839e+07	11053056	-964611	Asia	177925	0	0	0	0	0	0	177925	0	0	0	0	0	0	0	0	0	18	0	0	0	0	0	0	0	0	0	9884.7	0	0	0
591	Kudus	Indonesia	South-Eastern Asia	6.55705e+07	11060879	-840682	Asia	383071	0	380897	2174.55	0	0	0	0	0	0	0	0.012029	65.1242	0.863776	0	0	0	0	0	0	0	0	5848.77	2517.5	0	0	0	0	0	0	0
155	Beni	Dem. Rep. Congo	Middle Africa	3.07925e+07	2953081	61113	Africa	551580	0	404844	146735	0	0	0	0	0	0	0	0	24.6613	6.33872	0	0	0	0	0	0	0	0	16416.2	23149.1	0	0	0	0	0	0	0
920	Purwodadi	Indonesia	South-Eastern Asia	2.58312e+07	11063346	-876577	Asia	196036	0	0	0	196036	0	0	0	0	0	0	0	0	0	26	0	0	0	0	0	0	0	0	0	7539.86	0	0	0	0	0	0
956	Rutshuru	Dem. Rep. Congo	Middle Africa	6.95318e+06	2949214	-142500	Africa	59435.8	0	0	0	0	0	0	59435.8	0	0	0	0	0	0	0	0	0	7	0	0	0	0	0	0	0	0	0	8490.83	0	0	0
842	Pacitan	Indonesia	South-Eastern Asia	1.98715e+07	11064600	-1012100	Asia	208858	0	0	0	208858	0	0	0	0	0	0	0	0	0	20	0	0	0	0	0	0	0	0	0	10442.9	0	0	0	0	0	0
1055	Sragen	Indonesia	South-Eastern Asia	2.38447e+07	11069292	-917417	Asia	184642	0	0	0	0	0	0	15137.4	169505	0	0	0	0	0	0	0	0	3.94734	20.0527	0	0	0	0	0	0	0	0	3834.84	8452.98	0	0
880	Pati	Indonesia	South-Eastern Asia	2.58307e+07	11080038	-834500	Asia	181228	176622	0	0	0	0	0	0	0	0	0	24.2522	0	0	0	0	0	0	0	0	0	7282.75	0	0	0	0	0	0	0	0	0
502	Juwana	Indonesia	South-Eastern Asia	2.28502e+07	11093109	-830457	Asia	117728	22466.2	0	0	0	0	0	0	0	0	0	11.2794	0	0	0	0	0	0	0	0	0	1991.8	0	0	0	0	0	0	0	0	0
185	Bunia	Dem. Rep. Congo	Middle Africa	2.88061e+07	3030810	192948	Africa	208847	208847	0	0	0	0	0	0	0	0	0	29	0	0	0	0	0	0	0	0	0	7201.61	0	0	0	0	0	0	0	0	0
903	Ponorogo	Indonesia	South-Eastern Asia	6.2594e+07	11104659	-972024	Asia	272004	0	0	0	0	0	0	223339	48664.5	0	0	0	0	0	0	0	0	51.9307	11.0693	0	0	0	0	0	0	0	0	4300.72	4396.35	0	0
661	Madiun	Indonesia	South-Eastern Asia	9.04121e+07	11113841	-940489	Asia	368866	0	0	0	0	0	0	257401	111465	0	0	0	0	0	0	0	0	59.6913	31.3087	0	0	0	0	0	0	0	0	4312.2	3560.19	0	0
498	Joresan	Indonesia	South-Eastern Asia	2.28519e+07	11108065	-979848	Asia	83839.7	0	0	0	0	0	0	82583.9	1255.81	0	0	0	0	0	0	0	0	22.3319	0.668123	0	0	0	0	0	0	0	0	3698.03	1879.61	0	0
800	Ngawi	Indonesia	South-Eastern Asia	1.39094e+07	11111571	-914857	Asia	99081.1	0	0	0	0	0	0	99081.1	0	0	0	0	0	0	0	0	0	14	0	0	0	0	0	0	0	0	0	7077.22	0	0	0
169	Blora	Indonesia	South-Eastern Asia	1.68895e+07	11115618	-860912	Asia	120246	0	0	120246	0	0	0	0	0	0	0	0	0	17	0	0	0	0	0	0	0	0	0	7073.3	0	0	0	0	0	0	0
1153	Trenggalek	Indonesia	South-Eastern Asia	2.28521e+07	11126543	-995935	Asia	106549	0	0	0	0	0	0	27294.7	79254.6	0	0	0	0	0	0	0	0	8.14074	14.8593	0	0	0	0	0	0	0	0	3352.85	5333.68	0	0
845	Padangan	Indonesia	South-Eastern Asia	2.18573e+07	11131591	-882909	Asia	129862	0	0	43489.8	86372.5	0	0	0	0	0	0	0	0	9.82216	12.1778	0	0	0	0	0	0	0	0	4427.73	7092.6	0	0	0	0	0	0
1166	Tulungagung	Indonesia	South-Eastern Asia	1.2519e+08	11151611	-998770	Asia	452858	0	0	0	0	0	33928.8	371083	47846.7	0	0	0	0	0	0	0	16.0299	95.1282	14.8419	0	0	0	0	0	0	0	2116.6	3900.87	3223.76	0	0
799	Nganjuk	Indonesia	South-Eastern Asia	8.44508e+07	11153347	-939371	Asia	276905	0	0	0	0	0	0	44446	232459	0	0	0	0	0	0	0	0	11.9363	73.0637	0	0	0	0	0	0	0	0	3723.6	3181.6	0	0
173	Bojonegoro	Indonesia	South-Eastern Asia	2.58313e+07	11159885	-883308	Asia	216063	0	0	216063	0	0	0	0	0	0	0	0	0	26	0	0	0	0	0	0	0	0	0	8310.12	0	0	0	0	0	0	0
538	Kediri	Indonesia	South-Eastern Asia	1.02336e+08	11163286	-964908	Asia	409109	0	0	0	0	0	0	116086	293023	0	0	0	0	0	0	0	0	30.3245	72.6755	0	0	0	0	0	0	0	0	3828.11	4031.94	0	0
166	Blitar	Indonesia	South-Eastern Asia	8.64407e+07	11172856	-1003247	Asia	256636	0	0	0	0	0	0	6764.66	249872	0	0	0	0	0	0	0	0	3.27936	83.7068	0.0138867	0	0	0	0	0	0	0	2062.8	2985.08	0	0
874	Pare	Indonesia	South-Eastern Asia	5.0671e+07	11180206	-960559	Asia	169575	0	0	0	0	0	0	0	139826	29749.5	0	0	0	0	0	0	0	0	38.4154	12.5846	0	0	0	0	0	0	0	0	3639.83	2363.96	0
1159	Tuban	Indonesia	South-Eastern Asia	3.07984e+07	11179855	-852274	Asia	162981	44802.2	0	0	0	0	0	0	0	0	0	11.1156	0	0	0	0	0	0	0	0	0	4030.58	0	0	0	0	0	0	0	0	0
497	Jombang	Indonesia	South-Eastern Asia	4.37155e+07	11189250	-930523	Asia	252352	0	0	0	0	0	226376	25975.5	0	0	0	0	0	0	0	0	37.9122	6.08785	0	0	0	0	0	0	0	0	5971.07	4266.78	0	0	0
1069	Surabaya	Indonesia	South-Eastern Asia	7.69983e+08	11234694	-914601	Asia	4.07601e+06	0	0	0	0	0	1.04982e+06	1.38463e+06	804209	570338	267008	0	0	0	0	0	139.059	177.484	228.092	165.035	65.3298	0	0	0	0	0	7549.42	7801.45	3525.82	3455.86	4087.08
671	Malang	Indonesia	South-Eastern Asia	2.61306e+08	11221013	-980492	Asia	1.29716e+06	0	0	0	0	0	0	0	662104	592082	42976.9	0	0	0	0	0	0	0	127.434	127.276	8.28965	0	0	0	0	0	0	0	5195.64	4651.96	5184.41
610	Lamongan	Indonesia	South-Eastern Asia	1.29156e+07	11212423	-879654	Asia	71455.2	0	0	0	12288.7	59166.5	0	0	0	0	0	0	0	0	3.73253	9.26747	0	0	0	0	0	0	0	0	3292.33	6384.32	0	0	0	0	0
545	Kepanjen	Indonesia	South-Eastern Asia	1.98714e+07	11212050	-1003450	Asia	71714.8	0	0	0	0	0	0	0	71714.8	0	0	0	0	0	0	0	0	0	20	0	0	0	0	0	0	0	0	0	3585.74	0	0
379	Gondanglegi	Indonesia	South-Eastern Asia	1.78843e+07	11223167	-1009056	Asia	67325.1	0	0	0	0	0	0	0.0078125	67325.1	0	0	0	0	0	0	0	0	0.00442011	17.9956	0	0	0	0	0	0	0	0	1.76749	3741.2	0	0
909	Prigen	Indonesia	South-Eastern Asia	9.93544e+06	11225800	-949800	Asia	72638.2	0	0	0	0	0	0	0	0	0	72638.2	0	0	0	0	0	0	0	0	0	10	0	0	0	0	0	0	0	0	0	7263.82
386	Gresik	Indonesia	South-Eastern Asia	5.36497e+07	11234426	-884852	Asia	279757	0	0	0	0	139712	140045	0	0	0	0	0	0	0	0	27.0122	26.9878	0	0	0	0	0	0	0	0	5172.17	5189.2	0	0	0	0
123	Bangkalan	Indonesia	South-Eastern Asia	1.78831e+07	11247667	-867833	Asia	114828	0	0	1046.96	113781	0	0	0	0	0	0	0	0	0.961152	17.0388	0	0	0	0	0	0	0	0	1089.28	6677.72	0	0	0	0	0	0
879	Pasuruan	Indonesia	South-Eastern Asia	2.98062e+07	11252333	-945367	Asia	136141	0	0	0	0	0	0	95613.1	40528.2	0	0	0	0	0	0	0	0	17.8281	12.1719	0	0	0	0	0	0	0	0	5363.05	3329.67	0	0
518	Karang Kliwon	Indonesia	South-Eastern Asia	3.07999e+07	11261790	-951855	Asia	80630.8	0	0	0	0	0	0	0	80630.8	0	0	0	0	0	0	0	0	0.010227	30.9898	0	0	0	0	0	0	0	0	0	2601.85	0	0
533	Kebonan	Indonesia	South-Eastern Asia	1.19229e+07	11276250	-1015750	Asia	50441.2	0	0	0	0	0	0	21951.5	28489.7	0	0	0	0	0	0	0	0	4.11168	7.88832	0	0	0	0	0	0	0	0	5338.81	3611.63	0	0
911	Probolinggo	Indonesia	South-Eastern Asia	6.95484e+07	11281543	-958900	Asia	219097	0	0	0	0	0	0	43114.2	175983	0	0	0	0	0	0	0	0	15.1633	54.8367	0	0	0	0	0	0	0	0	2843.32	3209.22	0	0
652	Lumajang	Indonesia	South-Eastern Asia	1.98714e+07	11276950	-1002900	Asia	179601	0	0	0	0	0	0	0	128091	51510	0	0	0	0	0	0	0	0	11.8155	8.18445	0	0	0	0	0	0	0	0	10840.9	6293.64	0
796	Nenjiang	China	Eastern Asia	1.30125e+07	9627115	5786577	Asia	139656	0	0	0	0	139656	0	0	0	0	0	0	0	0	0	13	0	0	0	0	0	0	0	0	0	10742.8	0	0	0	0	0
970	Sampang	Indonesia	South-Eastern Asia	1.88768e+07	11294132	-889342	Asia	162814	0	162814	0	0	0	0	0	0	0	0	0	18.8587	0.141333	0	0	0	0	0	0	0	0	8633.36	0	0	0	0	0	0	0	0
118	Balung	Indonesia	South-Eastern Asia	7.55125e+07	11304750	-1029447	Asia	298808	0	0	0	0	0	202275	96532.9	0	0	0	0	0	0	0	0	53.5867	22.4133	0	0	0	0	0	0	0	0	3774.72	4306.95	0	0	0
590	Kraksaan	Indonesia	South-Eastern Asia	1.19226e+07	11302833	-958333	Asia	67261.8	0	0	0	0	0	0	0	67261.8	0	0	0	0	0	0	0	0	0	12	0	0	0	0	0	0	0	0	0	5605.15	0	0
587	Kotaanyar	Indonesia	South-Eastern Asia	1.68903e+07	11313618	-954500	Asia	54634.5	0	0	0	0	0	0	1.93359	54632.6	0	0	0	0	0	0	0	0	0.0545802	16.9454	0	0	0	0	0	0	0	0	35.4267	3224.03	0	0
489	Jember	Indonesia	South-Eastern Asia	7.45181e+07	11322193	-1010673	Asia	537706	0	0	0	0	0	0	13824.4	523882	0	0	0	0	0	0	0	0	6.93825	68.0617	0	0	0	0	0	0	0	0	1992.49	7697.16	0	0
858	Pamekasan	Indonesia	South-Eastern Asia	4.17275e+07	11319690	-882524	Asia	247360	161452	85907.7	0	0	0	0	0	0	0	0	31.2305	10.7695	0	0	0	0	0	0	0	0	5169.7	7976.93	0	0	0	0	0	0	0	0
176	Bondowoso	Indonesia	South-Eastern Asia	2.18583e+07	11340227	-978273	Asia	166736	0	0	0	0	0	0	17101	149635	0	0	0	0	0	0	0	0	3.88577	18.1142	0	0	0	0	0	0	0	0	4400.94	8260.62	0	0
1046	Situbondo	Indonesia	South-Eastern Asia	2.78192e+07	11361036	-951250	Asia	169978	0	0	0	0	0	167250	2727.65	0	0	0	0	0	0	0	0.0101445	26.9398	1.05007	0	0	0	0	0	0	0	0	6208.29	2597.59	0	0	0
511	Kalianget	Indonesia	South-Eastern Asia	1.98701e+07	11364500	-870150	Asia	55579.1	8609.63	0	0	0	0	0	0	0	0	0	4.29549	0	0	0	0	0	0	0	0	0	2004.34	0	0	0	0	0	0	0	0	0
323	Elizovskiy rayon	Russia	Eastern Europe	4.8089e+07	11565250	6189250	Europe	180769	0	0	0	0	0	0	0	180769	0	0	0	0	0	0	0	0	0.912862	47.0871	0	0	0	0	0	0	0	0	0	3839.03	0	0
368	Genteng	Indonesia	South-Eastern Asia	1.1923e+07	11365500	-1032417	Asia	73081.3	0	0	0	0	0	0	4356.25	68725	0	0	0	0	0	0	0	0	2.03004	9.96996	0	0	0	0	0	0	0	0	2145.89	6893.21	0	0
764	Muncar	Indonesia	South-Eastern Asia	1.09295e+07	11382045	-1042045	Asia	77415	0	0	0	0	0	77415	0	0	0	0	0	0	0	0	0	11	0	0	0	0	0	0	0	0	0	7037.73	0	0	0	0
134	Banyuwangi	Indonesia	South-Eastern Asia	2.88137e+07	11389672	-1014190	Asia	225809	0	0	0	0	0	0	0	223670	2138.52	0	0	0	0	0	0	0	0	28.1723	0.827688	0	0	0	0	0	0	0	0	7939.36	2583.73	0
793	Negara	Indonesia	South-Eastern Asia	9.93587e+06	11412600	-1032200	Asia	80222.5	0	0	0	0	80222.5	0	0	0	0	0	0	0	0	0	10	0	0	0	0	0	0	0	0	0	8022.25	0	0	0	0	0
1045	Singaraja	Indonesia	South-Eastern Asia	3.27878e+07	11462500	-1002561	Asia	157613	0	0	0	0	0	0	0	32017.6	125595	0	0	0	0	0	0	0	0	9.7224	23.2776	0	0	0	0	0	0	0	0	3293.18	5395.53	0
293	Denpasar	Indonesia	South-Eastern Asia	1.86798e+08	11464548	-1068926	Asia	363939	0	0	0	0	16234.9	190697	81994.7	75012.6	0	0	0	0	0	0	13.0928	122.22	39.107	13.5799	0	0	0	0	0	0	1239.99	1560.27	2096.68	5523.78	0	0
522	Karangasem	Indonesia	South-Eastern Asia	1.39103e+07	11507929	-1043143	Asia	56698.9	0	0	0	0	0	0	0	0	56698.9	0	0	0	0	0	0	0	0	0	14	0	0	0	0	0	0	0	0	0	4049.92	0
695	Mataram	Indonesia	South-Eastern Asia	8.94242e+07	11556000	-1060278	Asia	292493	0	0	0	0	0	292262	231.442	0	0	0	0	0	0	0	0	89.71	0.289972	0	0	0	0	0	0	0	0	3257.85	798.154	0	0	0
908	Praya	Indonesia	South-Eastern Asia	9.93611e+06	11570300	-1075100	Asia	103476	0	0	0	0	0	0	103476	0	0	0	0	0	0	0	0	0	10	0	0	0	0	0	0	0	0	0	10347.6	0	0	0
1013	Selong	Indonesia	South-Eastern Asia	3.57698e+07	11594444	-1066639	Asia	174728	0	0	0	0	0	0	835.828	173893	0	0	0	0	0	0	0	0	0.913345	35.0867	0	0	0	0	0	0	0	0	915.128	4956.09	0	0
1063	Sumbawa Besar	Indonesia	South-Eastern Asia	1.58975e+07	11687812	-1048312	Asia	89310.9	0	0	11918.2	77392.7	0	0	0	0	0	0	0	0	7.34044	8.65956	0	0	0	0	0	0	0	0	1623.64	8937.25	0	0	0	0	0	0
306	Dompu	Indonesia	South-Eastern Asia	8.94239e+06	11788833	-1054833	Asia	60542.2	0	0	0	18029.7	42512.4	0	0	0	0	0	0	0	0	1.38342	7.61658	0	0	0	0	0	0	0	0	13032.7	5581.56	0	0	0	0	0
159	Bima	Indonesia	South-Eastern Asia	1.88783e+07	11820447	-1044763	Asia	71738.4	0	0	0	0	0	71738.4	0	0	0	0	0	0	0	0	0	19	0	0	0	0	0	0	0	0	0	3775.71	0	0	0	0
794	Nehe	China	Eastern Asia	1.40112e+07	9683429	5713286	Asia	113362	98544.2	0	0	0	0	0	0	0	0	0	9.53544	0	0	0	0	0	0	0	0	0	10334.5	0	0	0	0	0	0	0	0	0
955	Ruteng	Indonesia	South-Eastern Asia	1.09296e+07	11989045	-1063318	Asia	74023.3	0	0	0	0	0	0	0	0	0	74023.3	0	0	0	0	0	0	0	0	0.00661164	10.9934	0	0	0	0	0	0	0	0	0	6733.44
325	Ende	Indonesia	South-Eastern Asia	1.78852e+07	12103333	-1091833	Asia	119048	0	0	0	0	0	0	0	0	0	119048	0	0	0	0	0	0	0	0	0	18	0	0	0	0	0	0	0	0	0	6613.76
701	Maumere	Indonesia	South-Eastern Asia	1.78849e+07	12163167	-1064056	Asia	110365	0	0	0	0	0	0	523.117	109842	0	0	0	0	0	0	0	0	0.682486	17.3175	0	0	0	0	0	0	0	0	766.488	6342.85	0	0
510	Kalabahi	Indonesia	South-Eastern Asia	1.19229e+07	12401000	-1014750	Asia	52276.6	0	0	0	0	52276.6	0	0	0	0	0	0	0	0	0	12	0	0	0	0	0	0	0	0	0	4356.39	0	0	0	0	0
589	Kotamobagu	Indonesia	South-Eastern Asia	1.2913e+07	12457962	91346	Asia	54752	0	0	0	0	0	0	0	0	54752	0	0	0	0	0	0	0	0	0	13	0	0	0	0	0	0	0	0	0	4211.69	0
673	Manado	Indonesia	South-Eastern Asia	4.66858e+07	12510032	182734	Asia	204696	0	0	0	0	0	0	0	0	200598	4097.71	0	0	0	0	0	0	0	0	45.0107	1.98928	0	0	0	0	0	0	0	0	4456.67	2059.9
165	Bitung	Indonesia	South-Eastern Asia	2.28462e+07	12542239	178283	Asia	64779.5	0	0	0	0	0	0	0	0	9095.47	55684	0	0	0	0	0	0	0	0	4.76108	18.2389	0	0	0	0	0	0	0	0	1910.38	3053.03
1125	Ternate	Indonesia	South-Eastern Asia	1.98662e+07	12765800	98150	Asia	61344.4	0	0	0	0	0	0	0	0	0	61344.4	0	0	0	0	0	0	0	0	0	20	0	0	0	0	0	0	0	0	0	3067.22
550	Keshan	China	Eastern Asia	9.00628e+06	9815833	5665500	Asia	60400	0	21158.7	39241.3	0	0	0	0	0	0	0	0	4.51598	4.48402	0	0	0	0	0	0	0	0	4685.3	8751.36	0	0	0	0	0	0	0
148	Bei'an	China	Eastern Asia	1.50112e+07	9839300	5688233	Asia	107229	0	0	0	26642.2	80586.7	0	0	0	0	0	0	0	0	4.59235	10.4076	0	0	0	0	0	0	0	0	5801.42	7743.03	0	0	0	0	0
309	Dongfeng	China	Eastern Asia	8.995e+06	10389944	5086389	Asia	86635.6	112.602	86523	0	0	0	0	0	0	0	0	0.266259	8.73374	0	0	0	0	0	0	0	0	422.903	9906.75	0	0	0	0	0	0	0	0
865	Panshi	China	Eastern Asia	1.19941e+07	10405750	5115167	Asia	73314.7	0	0	73314.7	0	0	0	0	0	0	0	0	0	12	0	0	0	0	0	0	0	0	0	6109.56	0	0	0	0	0	0	0
713	Meihekou	China	Eastern Asia	1.99882e+07	10417300	5070450	Asia	175148	0	0	171636	3511.95	0	0	0	0	0	0	0	0	18.6483	1.35175	0	0	0	0	0	0	0	0	9203.85	2598.08	0	0	0	0	0	0
444	Huinan	China	Eastern Asia	8.99501e+06	10431056	5086833	Asia	120209	0	0	0	0	120209	0	0	0	0	0	0	0	0	0	9	0	0	0	0	0	0	0	0	0	13356.6	0	0	0	0	0
634	Liuhe	China	Eastern Asia	1.19922e+07	10448833	5042333	Asia	94679.7	0	0	0	93753.7	926.013	0	0	0	0	0	0	0	0	11.761	0.239036	0	0	0	0	0	0	0	0	7971.6	3873.94	0	0	0	0	0
438	Huadian	China	Eastern Asia	1.99903e+07	10458650	5118650	Asia	107329	0	0	107329	0	0	0	0	0	0	0	0	0	20	0	0	0	0	0	0	0	0	0	5366.43	0	0	0	0	0	0	0
760	Mudanjiang	China	Eastern Asia	8.79904e+07	10515989	5294659	Asia	620437	425.688	531950	88060.9	0	0	0	0	0	0	0	0.277941	69.1911	18.531	0	0	0	0	0	0	0	1531.58	7688.14	4752.09	0	0	0	0	0	0	0
1146	Tonghua	China	Eastern Asia	5.99527e+06	10511500	4976000	Asia	62532.6	62532.6	0	0	0	0	0	0	0	0	0	6	0	0	0	0	0	0	0	0	0	10422.1	0	0	0	0	0	0	0	0	0
1146	Tonghua	China	Eastern Asia	3.19752e+07	10522125	4981875	Asia	308448	0	294647	13800.4	0	0	0	0	0	0	0	0	21.2298	10.7702	0	0	0	0	0	0	0	0	13878.9	1281.35	0	0	0	0	0	0	0
327	Erdaojiang	China	Eastern Asia	9.99236e+06	10525400	4987300	Asia	60916.3	0	0	60916.3	0	0	0	0	0	0	0	0	0	9.84515	0.154846	0	0	0	0	0	0	0	0	6187.44	0	0	0	0	0	0	0
806	Ning'an	China	Eastern Asia	1.29978e+07	10532192	5268269	Asia	73983.4	0	0	0	2205.28	71778.1	0	0	0	0	0	0	0	0	1.98063	11.0194	0	0	0	0	0	0	0	0	1113.42	6513.82	0	0	0	0	0
315	Dunhua	China	Eastern Asia	2.59897e+07	10539731	5161500	Asia	214692	214692	0	0	0	0	0	0	0	0	0	25.6494	0.350567	0	0	0	0	0	0	0	0	8370.26	0	0	0	0	0	0	0	0	0
111	Baishan	China	Eastern Asia	1.99855e+07	10540850	5005400	Asia	170325	0	0	0	0	0	170325	0	0	0	0	0	0	0	0	0	20	0	0	0	0	0	0	0	0	0	8516.27	0	0	0	0
491	Jiangyuan	China	Eastern Asia	1.2991e+07	10541577	5019885	Asia	62312.4	0	0	0	0	0	0	19113.1	43199.3	0	0	0	0	0	0	0	0	4.88833	8.11167	0	0	0	0	0	0	0	0	3909.94	5325.58	0	0
441	Huanglong	China	Eastern Asia	1.89021e+07	10567395	2441974	Asia	63333	0	0	63333	0	0	0	0	0	0	0	0	0	19	0	0	0	0	0	0	0	0	0	3333.31	0	0	0	0	0	0	0
631	Lingao County	China	Eastern Asia	9.94849e+06	10582000	2442500	Asia	72398.9	0	0	0	0	72398.9	0	0	0	0	0	0	0	0	0	10	0	0	0	0	0	0	0	0	0	7239.89	0	0	0	0	0
632	Linjiang	China	Eastern Asia	9.99244e+06	10594800	4991500	Asia	95973.4	0	0	0	95973.4	0	0	0	0	0	0	0	0	0	10	0	0	0	0	0	0	0	0	0	9597.34	0	0	0	0	0	0
1230	Xuwen	China	Eastern Asia	1.0944e+07	10611409	2493409	Asia	105321	0	0	0	0	0	105321	0	0	0	0	0	0	0	0	0	11	0	0	0	0	0	0	0	0	0	9574.62	0	0	0	0
218	Chengmai County	China	Eastern Asia	9.94823e+06	10620500	2421000	Asia	74190.4	0	0	0	0	0	0	48786.6	25403.8	0	0	0	0	0	0	0	0	6.4029	3.5971	0	0	0	0	0	0	0	0	7619.45	7062.31	0	0
1229	Xiuying District	China	Eastern Asia	1.06451e+08	10639491	2455435	Asia	447718	0	0	0	0	0	0	0	35335.8	402078	10304.7	0	0	0	0	0	0	0	16.2117	87.5762	3.21217	0	0	0	0	0	0	0	2179.65	4591.18	3208.01
1167	Tunchang County	China	Eastern Asia	8.95292e+06	10644167	2376833	Asia	56705	0	0	0	53486.4	3218.58	0	0	0	0	0	0	0	0	7.44734	1.55266	0	0	0	0	0	0	0	0	7181.94	2072.95	0	0	0	0	0
928	Qionghai	China	Eastern Asia	9.94752e+06	10684500	2362000	Asia	112318	0	0	112318	0	0	0	0	0	0	0	0	0	10	0	0	0	0	0	0	0	0	0	11231.8	0	0	0	0	0	0	0
639	Lori	Armenia	Western Asia	2.09792e+07	3751214	4879357	Asia	106828	0	0	0	0	0	33422.7	73405.1	0	0	0	0	0	0	0	0	10.1283	10.8717	0	0	0	0	0	0	0	0	3299.94	6751.93	0	0	0
11	Aceh Utara	Indonesia	South-Eastern Asia	1.98683e+07	9689050	648700	Asia	61317.1	0	0	0	0	61317.1	0	0	0	0	0	0	0	0	0	20	0	0	0	0	0	0	0	0	0	3065.86	0	0	0	0	0
0	Köln	Germany	Western Europe	2.60352e+07	518231	5963192	Europe	66135.9	0	8834.18	57301.8	0	0	0	0	0	0	0	0	3.42454	22.5755	0	0	0	0	0	0	0	0	2579.67	2538.23	0	0	0	0	0	0	0
1244	Yonezawa	Japan	Eastern Asia	1.79702e+07	12120833	4554667	Asia	78532.2	0	0	0	0	0	0	0	76999.8	1532.36	0	0	0	0	0	0	0	0	17.5662	0.433828	0	0	0	0	0	0	0	0	4383.41	3532.19	0
0	Ragusa	Italy	Southern Europe	9.98122e+06	1283700	4442200	Europe	51084	51084	0	0	0	0	0	0	0	0	0	10	0	0	0	0	0	0	0	0	0	5108.4	0	0	0	0	0	0	0	0	0
0	Shahriyar	Iran	Southern Asia	1.29719e+07	4499885	4297654	Asia	136578	50130.5	0	0	0	0	0	0	0	0	0	6.99593	0	0	0	0	0	0	0	0	0	7165.67	0	0	0	0	0	0	0	0	0
495	Joetsu	Japan	Eastern Asia	1.39743e+07	12039786	4464429	Asia	73298.5	0	0	0	0	0	0	74.7031	73223.8	0	0	0	0	0	0	0	0	0.0993222	13.9007	0	0	0	0	0	0	0	0	752.129	5267.64	0	0
0	T'ongch'on	North Korea	Eastern Asia	5.99151e+06	10964333	4672667	Asia	56033.7	0	56033.7	0	0	0	0	0	0	0	0	0	6	0	0	0	0	0	0	0	0	0	9338.95	0	0	0	0	0	0	0	0
0	Gurage	Ethiopia	Eastern Africa	3.97427e+06	3832250	995500	Africa	53724.1	0	0	0	0	0	0	0	0	53724.1	0	0	0	0	0	0	0	0	0	4	0	0	0	0	0	0	0	0	0	13431	0
0	Butig	Philippines	South-Eastern Asia	7.25295e+07	12389130	970842	Asia	259502	0	0	0	0	0	0	14740.2	202076	42685.8	0	0	0	0	0	0	0	6.02622	50.7112	16.2626	0	0	0	0	0	0	0	2446	3984.83	2624.78	0
0	Sakata	Japan	Eastern Asia	3.19544e+07	11991531	4667938	Asia	93747.5	0	0	0	0	0	0	2486.78	91260.7	0	0	0	0	0	0	0	0	3.86339	28.1366	0	0	0	0	0	0	0	0	643.679	3243.49	0	0
111	Baishan	China	Eastern Asia	8.9944e+06	10525500	5054500	Asia	57660.6	0	0	0	0	0	0	0	57660.6	0	0	0	0	0	0	0	0	0	9	0	0	0	0	0	0	0	0	0	6406.73	0	0
111	Baishan	China	Eastern Asia	9.99327e+06	10604800	5030900	Asia	58158.6	0	0	0	0	58158.6	0	0	0	0	0	0	0	0	0	10	0	0	0	0	0	0	0	0	0	5815.86	0	0	0	0	0
0	Maku	Iran	Southern Asia	1.69772e+07	3801794	4710029	Asia	105017	0	0	0	0	5512.59	99504.8	0	0	0	0	0	0	0	0	1.6675	15.3325	0	0	0	0	0	0	0	0	3305.9	6489.79	0	0	0	0
0	Kanoya	Japan	Eastern Asia	2.29292e+07	11890804	3805239	Asia	68743.8	0	0	0	0	0	0	9468.39	59275.4	0	0	0	0	0	0	0	0	5.1152	17.8848	0	0	0	0	0	0	0	0	1851.03	3314.29	0	0
0	Shahriyar	Iran	Southern Asia	2.59435e+07	4504577	4290962	Asia	91547.6	57095	0	0	0	0	0	0	0	0	0	15.3834	0	0	0	0	0	0	0	0	0	3711.47	0	0	0	0	0	0	0	0	0
0	Shahriyar	Iran	Southern Asia	1.49676e+07	4505767	4296767	Asia	75664.2	75664.2	0	0	0	0	0	0	0	0	0	15	0	0	0	0	0	0	0	0	0	5044.28	0	0	0	0	0	0	0	0	0
0	Ulaan Chab	China	Eastern Asia	7.99203e+06	9544875	4876750	Asia	61059.6	35506.6	25553.1	0	0	0	0	0	0	0	0	4.02611	3.97389	0	0	0	0	0	0	0	0	8819.07	6430.24	0	0	0	0	0	0	0	0
0	Munai	Philippines	South-Eastern Asia	5.86197e+07	12367568	970585	Asia	159093	0	0	0	0	0	0	133190	25903.4	0	0	0	0	0	0	0	0	47.5491	11.4509	0	0	0	0	0	0	0	0	2801.1	2262.13	0	0
0	Parang	Philippines	South-Eastern Asia	1.8877e+07	12391237	908921	Asia	59374.8	0	0	0	0	0	0	55369.3	4005.46	0	0	0	0	0	0	0	0	16.1688	2.83122	0	0	0	0	0	0	0	0	3424.46	1414.75	0	0
0	Seiro	Japan	Eastern Asia	1.79704e+07	12049000	4558944	Asia	67932.8	0	0	0	37425	30507.8	0	0	0	0	0	0	0	0	8.79804	9.20196	0	0	0	0	0	0	0	0	4253.79	3315.36	0	0	0	0	0
0	Ulaan Chab	China	Eastern Asia	8.99243e+06	9482056	4950833	Asia	60400.4	0	0	0	0	0	0	0	0	60400.4	0	0	0	0	0	0	0	0	0	9	0	0	0	0	0	0	0	0	0	6711.16	0
0	Gori	Georgia	Western Asia	9.99284e+06	3675900	5010300	Asia	50548.2	0	0	0	23114.6	27433.5	0	0	0	0	0	0	0	0	4.92187	5.07813	0	0	0	0	0	0	0	0	4696.31	5402.29	0	0	0	0	0
0	Mihara	Japan	Eastern Asia	1.79561e+07	11839500	4153833	Asia	50910.6	50910.6	0	0	0	0	0	0	0	0	0	18	0	0	0	0	0	0	0	0	0	2828.37	0	0	0	0	0	0	0	0	0
261	Cotabato City	Philippines	South-Eastern Asia	1.29157e+07	12389269	885038	Asia	97736.2	0	0	0	0	97736.2	0	0	0	0	0	0	0	0	0	13	0	0	0	0	0	0	0	0	0	7518.17	0	0	0	0	0
1240	Yingjiang County	China	Eastern Asia	8.9607e+06	9249833	3018500	Asia	50790.2	0	48682.4	2107.82	0	0	0	0	0	0	0	0	7.67513	1.32487	0	0	0	0	0	0	0	0	6342.87	1590.97	0	0	0	0	0	0	0
0	Catanzaro	Italy	Southern Europe	1.39802e+07	1397857	4673214	Europe	55421.5	55421.5	0	0	0	0	0	0	0	0	0	14	0	0	0	0	0	0	0	0	0	3958.68	0	0	0	0	0	0	0	0	0
0	Fujioka	Japan	Eastern Asia	2.29534e+07	12196457	4367630	Asia	54747.7	0	0	0	0	0	0	52314	2433.68	0	0	0	0	0	0	0	0	21.6166	1.38335	0	0	0	0	0	0	0	0	2420.08	1759.26	0	0
387	Groznenskiy rayon	Russia	Eastern Europe	1.79919e+07	3751833	5136222	Europe	84280.3	84280.3	0	0	0	0	0	0	0	0	0	18	0	0	0	0	0	0	0	0	0	4682.24	0	0	0	0	0	0	0	0	0
0	Chinchiná	Colombia	South America	4.96703e+06	-7559900	615700	South America	52833.5	0	0	0	0	0	0	52833.5	0	0	0	0	0	0	0	0	0	5	0	0	0	0	0	0	0	0	0	10566.7	0	0	0
0	Satsumasendai	Japan	Eastern Asia	2.09373e+07	11806548	3855595	Asia	67284.6	0	0	0	0	0	0	1456.77	65827.9	0	0	0	0	0	0	0	0	1.26729	19.7327	0	0	0	0	0	0	0	0	1149.52	3335.98	0	0
0	Balindong	Philippines	South-Eastern Asia	1.5897e+07	12377500	981562	Asia	58468.9	0	0	0	0	0	0	58468.9	0	0	0	0	0	0	0	0	0	16	0	0	0	0	0	0	0	0	0	3654.3	0	0	0
0	Komatsu	Japan	Eastern Asia	1.99601e+07	11952900	4381900	Asia	58809.3	0	0	0	0	0	10215.8	48593.6	0	0	0	0	0	0	0	0	3.55467	16.4453	0	0	0	0	0	0	0	0	2873.89	2954.86	0	0	0
1157	Tsuruga	Japan	Eastern Asia	1.89589e+07	11989763	4297026	Asia	65217	0	65217	0	0	0	0	0	0	0	0	0	19	0	0	0	0	0	0	0	0	0	3432.47	0	0	0	0	0	0	0	0
0	Takayama	Japan	Eastern Asia	1.29733e+07	12046962	4353962	Asia	54566.8	0	0	0	0	0	0	1627.64	52939.2	0	0	0	0	0	0	0	0	0.999975	12	0	0	0	0	0	0	0	0	1627.68	4411.59	0	0
0	Fujikawaguchiko	Japan	Eastern Asia	3.19298e+07	12244625	4280344	Asia	86497.6	0	0	0	0	0	0	0	8834.05	77663.5	0	0	0	0	0	0	0	0	3.57045	28.4295	0	0	0	0	0	0	0	0	2474.21	2731.79	0
0	Zestaponi	Georgia	Western Asia	1.29911e+07	3581962	5023500	Asia	54696.7	0	54696.7	0	0	0	0	0	0	0	0	0	13	0	0	0	0	0	0	0	0	0	4207.44	0	0	0	0	0	0	0	0
889	Perbaungan	Indonesia	South-Eastern Asia	7.94686e+06	9906500	441000	Asia	55904.5	0	0	0	55904.5	0	0	0	0	0	0	0	0	0	8	0	0	0	0	0	0	0	0	0	6988.06	0	0	0	0	0	0
1101	Tarutung	Indonesia	South-Eastern Asia	7.94658e+06	9915125	249750	Asia	61474.7	0	0	0	61474.7	0	0	0	0	0	0	0	0	0	8	0	0	0	0	0	0	0	0	0	7684.33	0	0	0	0	0	0
0	Hita	Japan	Eastern Asia	1.39626e+07	11739786	4030071	Asia	51183.6	0	0	0	0	0	12611.6	38572	0	0	0	0	0	0	0	0	5.3058	8.6942	0	0	0	0	0	0	0	0	2376.94	4436.52	0	0	0
74	Arga Makmur	Indonesia	South-Eastern Asia	7.94683e+06	10230750	-424750	Asia	56008.4	0	0	0	0	0	56008.4	0	0	0	0	0	0	0	0	0	8	0	0	0	0	0	0	0	0	0	7001.05	0	0	0	0
597	Kure	Japan	Eastern Asia	1.29679e+07	11812423	4135346	Asia	52287.5	8423.7	0	0	0	0	0	0	0	0	0	3.32461	0	0	0	0	0	0	0	0	0	2533.74	0	0	0	0	0	0	0	0	0
0	Parang	Philippines	South-Eastern Asia	1.78834e+07	12390500	901889	Asia	54512	0	0	0	0	0	10862.8	43649.2	0	0	0	0	0	0	0	0	1.83179	16.1682	0	0	0	0	0	0	0	0	5930.19	2699.69	0	0	0
0	Lumba-Bayabao	Philippines	South-Eastern Asia	2.08647e+07	12396024	973881	Asia	67879.9	0	0	0	0	0	0	0	67879.9	0	0	0	0	0	0	0	0	0	21	0	0	0	0	0	0	0	0	0	3232.38	0	0
0	Datu Odin Sinsuat	Philippines	South-Eastern Asia	1.98701e+06	12401500	868000	Asia	67963.7	0	0	0	67963.7	0	0	0	0	0	0	0	0	0	2	0	0	0	0	0	0	0	0	0	33981.9	0	0	0	0	0	0
0	Loire	France	Western Europe	1.7004e+07	325088	5453029	Europe	54821.9	11303.8	43518.1	0	0	0	0	0	0	0	0	5.30278	11.6972	0	0	0	0	0	0	0	0	2131.67	3720.38	0	0	0	0	0	0	0	0
0	Hyuga	Japan	Eastern Asia	2.69228e+07	11878019	3926944	Asia	56307.9	0	0	56307.9	0	0	0	0	0	0	0	0	0	27	0	0	0	0	0	0	0	0	0	2085.48	0	0	0	0	0	0	0
0	Caltanissetta	Italy	Southern Europe	7.986e+06	1220375	4506625	Europe	51351.4	8.64453	51342.7	0	0	0	0	0	0	0	0	0.00735967	7.99264	0	0	0	0	0	0	0	0	1174.58	6423.75	0	0	0	0	0	0	0	0
0	Odate	Japan	Eastern Asia	1.29855e+07	11906731	4820423	Asia	51345.7	0	0	0	0	0	0	51345.7	0	0	0	0	0	0	0	0	0	13	0	0	0	0	0	0	0	0	0	3949.67	0	0	0
0	Yurihonjo	Japan	Eastern Asia	1.39816e+07	11958857	4721571	Asia	56835.6	0	0	0	0	0	0	56835.6	0	0	0	0	0	0	0	0	0	14	0	0	0	0	0	0	0	0	0	4059.68	0	0	0
0	Kitakami	Japan	Eastern Asia	1.99733e+07	12060500	4711550	Asia	66173.8	0	0	0	0	6971.15	59202.7	0	0	0	0	0	0	0	0	3.67531	16.3247	0	0	0	0	0	0	0	0	1896.75	3626.57	0	0	0	0
0	Oshu	Japan	Eastern Asia	1.5978e+07	12080812	4692625	Asia	59123.1	0	0	0	0	0	0	59123.1	0	0	0	0	0	0	0	0	0	16	0	0	0	0	0	0	0	0	0	3695.2	0	0	0
0	Ichinoseki	Japan	Eastern Asia	1.39801e+07	12102000	4669000	Asia	56149.2	0	0	0	0	0	0	31020.7	25128.5	0	0	0	0	0	0	0	0	6.42673	7.57327	0	0	0	0	0	0	0	0	4826.83	3318.05	0	0
0	Gotemba	Japan	Eastern Asia	1.39687e+07	12275143	4257357	Asia	51841.8	0	0	0	0	0	0	0	0	48297.9	3543.9	0	0	0	0	0	0	0	0	12.3065	1.69352	0	0	0	0	0	0	0	0	3924.59	2092.62
0	Karanganyar	Indonesia	South-Eastern Asia	9.93542e+06	11076600	-946500	Asia	52128.2	0	0	0	0	0	0	0	0	1623.3	50504.9	0	0	0	0	0	0	0	0	0.88483	9.11517	0	0	0	0	0	0	0	0	1834.59	5540.75
0	Haut Nkam	Cameroon	Middle Africa	6.95389e+06	1017214	637214	Africa	52355	0	0	0	52355	0	0	0	0	0	0	0	0	0	7	0	0	0	0	0	0	0	0	0	7479.28	0	0	0	0	0	0
875	Pasaman	Indonesia	South-Eastern Asia	4.96653e+06	9977700	34100	Asia	50484.4	0	0	0	0	0	0	0	50484.4	0	0	0	0	0	0	0	0	0	5	0	0	0	0	0	0	0	0	0	10096.9	0	0
649	Lubuk Sikaping	Indonesia	South-Eastern Asia	4.96653e+06	10039300	16300	Asia	53198.2	0	0	0	0	0	0	0	53198.2	0	0	0	0	0	0	0	0	0	5	0	0	0	0	0	0	0	0	0	10639.6	0	0
0	Pesisir Selatan	Indonesia	South-Eastern Asia	7.9465e+06	10078000	-166625	Asia	51004.3	0	0	0	0	0	51004.3	0	0	0	0	0	0	0	0	0	8	0	0	0	0	0	0	0	0	0	6375.54	0	0	0	0
0	Datu Odin Sinsuat	Philippines	South-Eastern Asia	2.08636e+07	12402738	871500	Asia	69299.3	0	0	0	69299.3	0	0	0	0	0	0	0	0	0	21	0	0	0	0	0	0	0	0	0	3299.97	0	0	0	0	0	0
0	Noshiro	Japan	Eastern Asia	1.4983e+07	11870167	4811900	Asia	50197.6	0	0	0	0	0	3337.89	46859.7	0	0	0	0	0	0	0	0	1.6158	13.3842	0	0	0	0	0	0	0	0	2065.78	3501.12	0	0	0
0	Pesawaran	Indonesia	South-Eastern Asia	8.9408e+06	10504611	-664389	Asia	51532.7	0	0	51532.7	0	0	0	0	0	0	0	0	0	9	0	0	0	0	0	0	0	0	0	5725.86	0	0	0	0	0	0	0
0	Towada	Japan	Eastern Asia	1.39855e+07	11924929	4858071	Asia	50359.3	0	0	0	0	0	0	8015.43	42343.9	0	0	0	0	0	0	0	0	3.36153	10.6385	0	0	0	0	0	0	0	0	2384.46	3980.26	0	0
0	Anbyon	North Korea	Eastern Asia	5.99162e+06	10923333	4682167	Asia	50688.8	0	50673.6	15.2654	0	0	0	0	0	0	0	0	5.30487	0.695125	0	0	0	0	0	0	0	0	9552.27	21.9606	0	0	0	0	0	0	0

## Sheet: 1985
city_ID	Name	Country	Subregion	Area_km2	Lat	Lon	Continent	Ttl_Ppl	100to90	90to80	80to70	70to60	60to50	50to40	40to30	30to20	20to10	Pp_10km	Area100to90	Area90to80	Area80to70	Area70to60	Area60to50	Area50to40	Area40to30	Area30to20	Area20to10	Ar_10_2	Dens100to90	Dens90to80	Dens80to70	Dens70to60	Dens60to50	Dens50to40	Dens40to30	Dens30to20	Dens20to10	Dens10
869	Papeete	Fr. Polynesia	Polynesia	3.87861e+07	-14556449	-2157064	Oceania	66052.7	0	31165.1	34887.7	0	0	0	0	0	0	0	0	22.8138	16.1862	0	0	0	0	0	0	0	0	1366.06	2155.39	0	0	0	0	0	0	0
21	Ahuachapan	El Salvador	Central America	9.94077e+06	-8840600	1715700	North America	54838.6	0	0	0	0	0	0	0	0	54838.6	0	0	0	0	0	0	0	0	0	10	0	0	0	0	0	0	0	0	0	5483.86	0
226	Chinandega	Nicaragua	Central America	8.94547e+06	-8601500	1556500	North America	93576.3	0	0	0	0	0	0	0	0	93576.3	0	0	0	0	0	0	0	0	0	9	0	0	0	0	0	0	0	0	0	10397.4	0
75	Arica	Chile	South America	1.69089e+07	-6818618	-2270029	South America	105512	105512	0	0	0	0	0	0	0	0	0	17	0	0	0	0	0	0	0	0	0	6206.57	0	0	0	0	0	0	0	0	0
341	Fort-de-France	Martinique	Western Europe	4.37427e+07	-5997364	1799614	Europe	130647	0	0	0	0	0	0	0	130646	0.68327	0	0	0	0	0	0	0	0	43.9848	0.0152241	0	0	0	0	0	0	0	0	2970.26	44.8808	0
944	Reykjavik	Iceland	Northern Europe	4.81998e+07	-1301938	7262562	Europe	87997.1	0	0	0	0	0	0	0	76384.1	11612.9	0	0	0	0	0	0	0	0	42.6045	5.39547	0	0	0	0	0	0	0	0	1792.86	2152.35	0
3	Aachen	Germany	Western Europe	5.10681e+07	459696	5954578	Europe	193376	3421.12	189818	136.975	0	0	0	0	0	0	0	1.37912	49.5533	0.0675474	0	0	0	0	0	0	0	2480.67	3830.59	2027.84	0	0	0	0	0	0	0
656	Luxembourg	Luxembourg	Western Europe	2.30245e+07	468804	5832717	Europe	70922.2	0	57821.2	13101.1	0	0	0	0	0	0	0	0	14.9069	8.09314	0	0	0	0	0	0	0	0	3878.83	1618.79	0	0	0	0	0	0	0
628	Limbe	Cameroon	Middle Africa	1.49006e+07	921300	496233	Africa	61349.4	0	0	0	0	0	0	0	57443.5	3905.98	0	0	0	0	0	0	0	0	13.3722	1.62777	0	0	0	0	0	0	0	0	4295.73	2399.58	0
953	Rubavu	Rwanda	Eastern Africa	2.58262e+07	2932654	-207077	Africa	62804.7	0	0	0	0	0	0	0	0	62804.7	0	0	0	0	0	0	0	0	0	26	0	0	0	0	0	0	0	0	0	2415.57	0
395	Gyumri	Armenia	Western Asia	2.39762e+07	3696542	4877708	Asia	143621	0	0	0	0	0	130113	13508.6	0	0	0	0	0	0	0	0	20.1014	3.89857	0	0	0	0	0	0	0	0	6472.8	3465.01	0	0	0
780	Nakhchivan	Azerbaijan	Western Asia	1.89742e+07	3883921	4700395	Asia	70727.3	0	0	0	70727.3	0	0	0	0	0	0	0	0	0	19	0	0	0	0	0	0	0	0	0	3722.49	0	0	0	0	0	0
755	Moroni	Comoros	Eastern Africa	1.59016e+07	4279438	-1442188	Africa	51878.4	0	0	0	0	0	0	0	0	51878.4	0	0	0	0	0	0	0	0	0	16	0	0	0	0	0	0	0	0	0	3242.4	0
836	Otaru	Japan	Eastern Asia	3.39852e+07	11610471	5143000	Asia	130875	0	0	0	0	0	130875	0	0	0	0	0	0	0	0	0	34	0	0	0	0	0	0	0	0	0	3849.25	0	0	0	0
1053	Sonsonate	El Salvador	Central America	1.49108e+07	-8833100	1690500	North America	96984.3	0	0	0	0	0	0	0	0	96984.3	0	0	0	0	0	0	0	0	0	15	0	0	0	0	0	0	0	0	0	6465.62	0
622	León	Nicaragua	Central America	1.49088e+07	-8580500	1533167	North America	138021	0	0	0	0	0	0	0	35267	102754	0	0	0	0	0	0	0	0	3.91191	11.0881	0	0	0	0	0	0	0	0	9015.29	9267.07	0
721	Mendoza	Argentina	South America	1.42606e+08	-6189612	-3982052	South America	580854	8211.23	0	0	0	0	0	0	0	0	0	4.72175	0	0	0	0	0	0	0	0	0	1739.02	0	0	0	0	0	0	0	0	0
494	João Teves	Cabo Verde	Western Africa	1.59073e+07	-2314500	1854125	Africa	79572.3	0	72500.7	7071.59	0	0	0	0	0	0	0	0	12.5879	3.41207	0	0	0	0	0	0	0	0	5759.54	2072.52	0	0	0	0	0	0	0
1237	Yerevan	Armenia	Western Asia	1.90783e+08	3772961	4808652	Asia	1.21194e+06	0	0	0	0	0	938750	273189	0	0	0	0	0	0	0	0	157.064	33.9358	0	0	0	0	0	0	0	0	5976.86	8050.17	0	0	0
340	Fomboni	Comoros	Eastern Africa	1.19269e+07	4322333	-1514667	Africa	108656	0	0	103066	5590.5	0	0	0	0	0	0	0	0	8.79901	3.20099	0	0	0	0	0	0	0	0	11713.3	1746.49	0	0	0	0	0	0
1039	Sigli	Indonesia	South-Eastern Asia	2.18553e+07	9590545	664682	Asia	83376.9	0	0	0	83376.9	0	0	0	0	0	0	0	0	0	22	0	0	0	0	0	0	0	0	0	3789.86	0	0	0	0	0	0
1018	Seoul	South Korea	Eastern Asia	1.22086e+09	11019830	4506462	Asia	14438193	4988167	3.55311e+06	654050	75500.4	0	0	0	0	0	0	296.789	234.106	47.0995	15.7549	0	0	0	0	0	0	16807.1	15177.4	13886.6	4792.18	0	0	0	0	0	0
1007	Sapporo	Japan	Eastern Asia	3.06858e+08	11654428	5129568	Asia	1.80164e+06	0	0	0	0	89155.2	1.18906e+06	523430	0	0	0	0	0	0	0	29.0534	177.739	100.208	0	0	0	0	0	0	0	3068.67	6689.9	5223.46	0	0	0
1192	Vancouver	Canada	Northern America	5.00488e+08	-9449228	5791960	North America	1.02033e+06	0	67469	373711	517822	61327.2	0	0	0	0	0	0	32.061	214.437	221.218	32.2838	0	0	0	0	0	0	2104.39	1742.75	2340.78	1899.62	0	0	0	0	0
674	Managua	Nicaragua	Central America	1.08334e+08	-8524665	1495803	North America	605538	0	0	0	0	0	0	0	0	202678	402860	0	0	0	0	0	0	0	0	37.616	71.384	0	0	0	0	0	0	0	0	5388.08	5643.56
979	San José	Costa Rica	Central America	2.54388e+08	-8348430	1226680	North America	888905	0	0	0	0	0	0	1617	589381	297907	0	0	0	0	0	0	0	0.762757	134.058	121.179	0	0	0	0	0	0	0	2119.94	4396.46	2458.4	0
997	Santa Cruz de Tenerife	Spain	Southern Europe	5.28056e+07	-1507557	3462160	Europe	277363	0	0	0	0	0	179077	98285.7	0	0	0	0	0	0	0	0	24.7011	28.2989	0	0	0	0	0	0	0	0	7249.77	3473.13	0	0	0
1107	Tbilisi	Georgia	Western Asia	1.37893e+08	3745688	4980428	Asia	1.05402e+06	875334	60958.5	0	0	0	0	0	0	0	0	101.633	10.4634	0	0	0	0	0	0	0	0	8612.71	5825.9	0	0	0	0	0	0	0	0
359	Ganja	Azerbaijan	Western Asia	4.59532e+07	3911826	4865870	Asia	289388	123621	165767	0	0	0	0	0	0	0	0	21.9965	24.0035	0	0	0	0	0	0	0	0	5620.03	6905.96	0	0	0	0	0	0	0	0
429	Hodeidah	Yemen	Western Asia	2.78369e+07	4216214	1822036	Asia	197742	1103	196639	0	0	0	0	0	0	0	0	0.333358	27.6666	0	0	0	0	0	0	0	0	3308.75	7107.44	0	0	0	0	0	0	0	0
302	Djibouti	Djibouti	Eastern Africa	4.57167e+07	4269109	1427609	Africa	213065	0	0	185779	27286.5	0	0	0	0	0	0	0	0	42.3518	3.64822	0	0	0	0	0	0	0	0	4386.56	7479.39	0	0	0	0	0	0
961	Saint-Denis	Réunion	Western Europe	2.2885e+07	5330413	-2561370	Europe	100730	0	0	0	0	0	100730	0	0	0	0	0	0	0	0	0.18945	22.8106	0	0	0	0	0	0	0	0	0	4415.92	0	0	0	0
726	Meulaboh	Indonesia	South-Eastern Asia	1.49006e+07	9618300	512567	Asia	96202.2	0	96202.2	0	0	0	0	0	0	0	0	0	15	0	0	0	0	0	0	0	0	0	6413.48	0	0	0	0	0	0	0	0
436	Hsinchu	Taiwan	Eastern Asia	8.86131e+07	11420242	3031579	Asia	423371	0	0	234858	188513	0	0	0	0	0	0	0	0	43.2512	45.7488	0	0	0	0	0	0	0	0	5430.1	4120.61	0	0	0	0	0	0
524	Karatsu	Japan	Eastern Asia	2.69287e+07	11643315	4045130	Asia	74885.6	0	64120.6	10765	0	0	0	0	0	0	0	0	22.8062	4.19382	0	0	0	0	0	0	0	0	2811.55	2566.87	0	0	0	0	0	0	0
995	Santa Ana	El Salvador	Central America	2.58462e+07	-8810231	1722615	North America	192828	0	0	0	0	0	0	0	0	157217	35611.5	0	0	0	0	0	0	0	0	20.496	5.504	0	0	0	0	0	0	0	0	7670.59	6470.12
987	San Pedro Sula	Honduras	Central America	4.77243e+07	-8621750	1907938	North America	258278	0	0	0	114174	144104	0	0	0	0	0	0	0	0	21.4173	26.5827	0	0	0	0	0	0	0	0	5330.93	5420.98	0	0	0	0	0
335	Esteli	Nicaragua	Central America	1.19279e+07	-8515417	1613250	North America	71099.3	0	0	71099.3	0	0	0	0	0	0	0	0	0	12	0	0	0	0	0	0	0	0	0	5924.94	0	0	0	0	0	0	0
203	Cartago	Costa Rica	Central America	2.88172e+07	-8334293	1216603	North America	110473	0	0	0	0	0	0	0	0	110473	0	0	0	0	0	0	0	0	0	29	0	0	0	0	0	0	0	0	0	3809.4	0
878	Pasto	Colombia	South America	2.68194e+07	-7743648	149574	South America	199853	0	0	0	0	0	0	0	0	122986	76867.6	0	0	0	0	0	0	0	0	16.7671	10.2329	0	0	0	0	0	0	0	0	7334.94	7511.82
557	Kigali	Rwanda	Eastern Africa	4.76794e+07	3013458	-242000	Africa	128805	0	13550.4	115254	0	0	0	0	0	0	0	0	9.23592	38.7641	0	0	0	0	0	0	0	0	1467.14	2973.23	0	0	0	0	0	0	0
162	Bireuen	Indonesia	South-Eastern Asia	1.78815e+07	9667167	642833	Asia	119015	0	0	0	0	38126.2	80889	0	0	0	0	0	0	0	0	7.24641	10.7536	0	0	0	0	0	0	0	0	5261.39	7522.05	0	0	0	0
1150	Toufen	Taiwan	Eastern Asia	3.28557e+07	11418621	3015015	Asia	149104	8165.62	140939	0	0	0	0	0	0	0	0	4.72632	28.2737	0	0	0	0	0	0	0	0	1727.69	4984.81	0	0	0	0	0	0	0	0
1009	Sasebo	Japan	Eastern Asia	3.19135e+07	11645219	4012188	Asia	90518.2	0	0	44444.9	46073.3	0	0	0	0	0	0	0	0	14.3213	17.6787	0	0	0	0	0	0	0	0	3103.41	2606.15	0	0	0	0	0	0
273	Dagupan [Lingayen]	Philippines	South-Eastern Asia	4.57387e+07	11763500	1972196	Asia	90913.7	32510.6	0	0	0	0	0	0	0	0	0	22.2	0	0	0	0	0	0	0	0	0	1464.44	0	0	0	0	0	0	0	0	0
931	Quetzaltenango	Guatemala	Central America	2.98254e+07	-8982800	1828233	North America	74816.4	0	0	0	0	0	0	0	0	350.742	74465.7	0	0	0	0	0	0	0	0	0.170146	29.8299	0	0	0	0	0	0	0	0	2061.42	2496.35
690	Masaya	Nicaragua	Central America	1.29204e+07	-8512192	1476577	North America	86779.8	0	0	0	0	0	0	0	0	1333.14	85446.7	0	0	0	0	0	0	0	0	0.920193	12.0798	0	0	0	0	0	0	0	0	1448.76	7073.51
612	Las Palmas de Gran Canaria	Spain	Southern Europe	4.08469e+07	-1431207	3421988	Europe	298561	0	0	0	0	0	0	0	71643.1	226918	0	0	0	0	0	0	0	0	12.6341	28.3659	0	0	0	0	0	0	0	0	5670.61	7999.67	0
594	Kumba	Cameroon	Middle Africa	2.18546e+07	944636	572909	Africa	128489	0	0	0	0	0	0	128486	3.80889	0	0	0	0	0	0	0	0	21.9172	0.0827957	0	0	0	0	0	0	0	0	5862.32	46.0034	0	0
1090	Takengon	Indonesia	South-Eastern Asia	1.19207e+07	9686750	572167	Asia	76712.6	0	0	0	0	0	0	0	0	76712.6	0	0	0	0	0	0	0	0	0	12	0	0	0	0	0	0	0	0	0	6392.72	0
729	Miaoli	Taiwan	Eastern Asia	1.69253e+07	11419441	3001147	Asia	93575.5	35467.9	0	0	0	0	0	0	0	0	0	6.6581	0	0	0	0	0	0	0	0	0	5327.03	0	0	0	0	0	0	0	0	0
91	Asahikawa	Japan	Eastern Asia	7.69771e+07	11651734	5207266	Asia	278737	0	0	0	0	0	135848	142889	0	0	0	0	0	0	0	0	40.2293	36.7707	0	0	0	0	0	0	0	0	3376.84	3885.94	0	0	0
312	Douala	Cameroon	Middle Africa	1.49999e+08	973791	501109	Africa	701675	0	0	79218.2	537089	85367.9	0	0	0	0	0	0	0	20.6733	102.881	27.4458	0	0	0	0	0	0	0	3831.91	5220.5	3110.42	0	0	0	0	0
99	Athens	Greece	Southern Europe	3.91359e+08	2052339	4563658	Europe	3.2438e+06	0	0	0	613463	1.69375e+06	936586	0	0	0	0	0	0	0	125.8	141.299	124.901	0	0	0	0	0	0	0	4876.51	11987	7498.63	0	0	0	0
624	Lhokseumawe	Indonesia	South-Eastern Asia	2.08617e+07	9710738	640690	Asia	66106.7	0	0	0	0	66106.7	0	0	0	0	0	0	0	0	0.483587	20.5164	0	0	0	0	0	0	0	0	0	3222.14	0	0	0	0	0
351	Fukuoka	Japan	Eastern Asia	4.06936e+08	11672172	4062544	Asia	2.00472e+06	999868	921907	38001.3	0	0	0	0	0	0	0	194.277	171.869	16.6792	0	0	0	0	0	0	0	5146.62	5364.02	2278.36	0	0	0	0	0	0	0
988	San Salvador	El Salvador	Central America	1.99805e+08	-8780420	1688336	North America	1.33914e+06	0	0	0	0	0	0	0	0	746513	592624	0	0	0	0	0	0	0	0	107.611	93.3888	0	0	0	0	0	0	0	0	6937.13	6345.77
384	Granada	Nicaragua	Central America	1.19265e+07	-8499250	1471250	North America	82694.9	0	0	0	0	0	0	0	0	0	82694.9	0	0	0	0	0	0	0	0	0	12	0	0	0	0	0	0	0	0	0	6891.24
904	Popayán	Colombia	South America	2.08599e+07	-7673881	302357	South America	127500	0	0	0	0	0	0	16546.2	110954	0	0	0	0	0	0	0	0	3.62049	17.3795	0	0	0	0	0	0	0	0	4570.14	6384.17	0	0
1154	Trier	Germany	Western Europe	1.60176e+07	506875	5847125	Europe	61040.7	0	0	0	0	15842.8	45197.9	0	0	0	0	0	0	0	0	6.31787	9.68213	0	0	0	0	0	0	0	0	2507.62	4668.18	0	0	0	0
807	Nkongsamba	Cameroon	Middle Africa	1.49011e+07	993567	612833	Africa	115791	0	0	0	0	0	0	115791	0	0	0	0	0	0	0	0	0	15	0	0	0	0	0	0	0	0	0	7719.38	0	0	0
1252	Zalingei	Sudan	Northern Africa	1.19276e+07	2315333	1591250	Africa	81736.2	0	81736.2	0	0	0	0	0	0	0	0	0	12	0	0	0	0	0	0	0	0	0	6811.35	0	0	0	0	0	0	0	0
565	Kisumu	Kenya	Eastern Africa	3.77456e+07	3484684	-11684	Africa	182874	0	0	0	0	0	173260	9614.77	0	0	0	0	0	0	0	0	34.3178	3.68217	0	0	0	0	0	0	0	0	5048.68	2611.17	0	0	0
567	Kitakyushu	Japan	Eastern Asia	3.38138e+08	11683217	4097603	Asia	1.14667e+06	87503.1	690946	358929	9291.16	0	0	0	0	0	0	27.7581	194.196	111.514	5.53237	0	0	0	0	0	0	3152.35	3557.99	3218.7	1679.42	0	0	0	0	0	0
406	Hamilton	New Zealand	Australia and New Zealand	5.89006e+07	15179178	-4539568	Oceania	74814.5	5189.98	0	0	0	0	0	0	0	0	0	4.51135	0	0	0	0	0	0	0	0	0	1150.43	0	0	0	0	0	0	0	0	0
1085	Taipei	Taiwan	Eastern Asia	6.76073e+08	11452927	3056286	Asia	5738134	0	0	0	0	16403	250192	450990	1.64266e+06	2.99874e+06	379146	0	0	0	0	3.91082	81.1761	116.715	166.485	269.264	41.4493	0	0	0	0	4194.26	3082.09	3864.02	9866.73	11136.8	9147.21
825	Omura	Japan	Eastern Asia	3.49036e+07	11684671	3983871	Asia	96176.8	0	0	0	0	0	1651.7	94525.1	0	0	0	0	0	0	0	0	2.88563	32.1144	0	0	0	0	0	0	0	0	572.389	2943.39	0	0	0
102	Auckland	New Zealand	Australia and New Zealand	5.36987e+08	15249634	-4439457	Oceania	690815	0	0	0	0	0	0	0	33023.7	308694	349098	0	0	0	0	0	0	0	31.4446	239.462	267.094	0	0	0	0	0	0	0	1050.22	1289.12	1307.02
321	El Progreso	Honduras	Central America	1.59079e+07	-8603250	1895625	North America	78898.3	0	0	0	0	78108.7	789.633	0	0	0	0	0	0	0	0	15.6965	0.303451	0	0	0	0	0	0	0	0	4976.17	2602.18	0	0	0	0
694	Matagalpa	Nicaragua	Central America	9.93972e+06	-8475800	1593300	North America	74110.1	0	74110.1	0	0	0	0	0	0	0	0	0	10	0	0	0	0	0	0	0	0	0	7411.01	0	0	0	0	0	0	0	0
199	Cali	Colombia	South America	1.4801e+08	-7660601	424198	South America	1.45165e+06	0	408738	1.04291e+06	0	0	0	0	0	0	0	0	43.4597	105.54	0	0	0	0	0	0	0	0	9404.98	9881.63	0	0	0	0	0	0	0
255	Cologne	Germany	Western Europe	2.48343e+08	524690	5975351	Europe	870310	311679	535332	0	0	0	0	0	0	0	0	125.018	116.249	0	0	0	0	0	0	0	0	2493.08	4605.04	0	0	0	0	0	0	0	0
314	Dschang	Cameroon	Middle Africa	1.29145e+07	1005423	673577	Africa	52555	0	52555	0	0	0	0	0	0	0	0	0	13	0	0	0	0	0	0	0	0	0	4042.69	0	0	0	0	0	0	0	0
693	Massawa	Eritrea	Eastern Africa	1.4914e+07	3864367	1921300	Africa	58441.7	58441.7	0	0	0	0	0	0	0	0	0	15	0	0	0	0	0	0	0	0	0	3896.11	0	0	0	0	0	0	0	0	0
234	Chuncheon	South Korea	Eastern Asia	2.39601e+07	11053292	4550750	Asia	181885	0	0	0	170354	11530.9	0	0	0	0	0	0	0	0	19.5949	4.40513	0	0	0	0	0	0	0	0	8693.79	2617.61	0	0	0	0	0
775	Nagasaki	Japan	Eastern Asia	7.878e+07	11688576	3967259	Asia	317335	0	0	0	0	0	215449	101886	0	0	0	0	0	0	0	0	56.8845	22.1155	0	0	0	0	0	0	0	0	3787.49	4606.98	0	0	0
232	Choluteca	Honduras	Central America	1.49102e+07	-8592367	1639167	North America	83162.1	0	0	0	0	5145.73	78016.3	0	0	0	0	0	0	0	0	1.86571	13.1343	0	0	0	0	0	0	0	0	2758.06	5939.9	0	0	0	0
532	Kebkabiya	Sudan	Northern Africa	1.39167e+07	2372357	1681571	Africa	190300	0	74527.1	115773	0	0	0	0	0	0	0	0	5.48186	8.51814	0	0	0	0	0	0	0	0	13595.2	13591.4	0	0	0	0	0	0	0
959	Saga	Japan	Eastern Asia	2.39356e+07	11687625	4022792	Asia	61540.9	0	0	0	0	61540.9	0	0	0	0	0	0	0	0	0	24	0	0	0	0	0	0	0	0	0	2564.21	0	0	0	0	0
727	Mexicali	Mexico	Central America	1.32625e+08	-10402410	3949229	North America	340790	0	0	0	0	0	0	65670.1	241233	33886.7	0	0	0	0	0	0	0	25.9114	95.4911	11.5975	0	0	0	0	0	0	0	2534.41	2526.24	2921.9	0
1113	Tegucigalpa	Honduras	Central America	8.94684e+07	-8576211	1734322	North America	621118	609926	1006.27	0	0	0	0	0	0	0	0	87.5909	0.269999	0	0	0	0	0	0	0	0	6963.34	3726.93	0	0	0	0	0	0	0	0
177	Bonn	Germany	Western Europe	2.34313e+08	534308	5954876	Europe	600459	0	53644.4	223693	309195	13927	0	0	0	0	0	0	16.3621	106.618	106.198	4.822	0	0	0	0	0	0	3278.58	2098.08	2911.5	2888.23	0	0	0	0	0
120	Bamenda	Cameroon	Middle Africa	4.47052e+07	1014256	736833	Africa	158600	0	0	0	0	82360.6	76239.5	0	0	0	0	0	0	0	0	21.9777	23.0223	0	0	0	0	0	0	0	0	3747.45	3311.56	0	0	0	0
527	Kas	Sudan	Northern Africa	1.19272e+07	2398583	1541583	Africa	98318.3	0	0	0	0	25562.6	72755.7	0	0	0	0	0	0	0	0	3.39458	8.60542	0	0	0	0	0	0	0	0	7530.41	8454.64	0	0	0	0
863	Pangkalan Brandan	Indonesia	South-Eastern Asia	1.29138e+07	9835423	496346	Asia	101541	39073.5	62467.7	0	0	0	0	0	0	0	0	4.70113	8.29887	0	0	0	0	0	0	0	0	8311.51	7527.26	0	0	0	0	0	0	0	0
457	Iizuka	Japan	Eastern Asia	2.79272e+07	11690786	4066893	Asia	74108	0	0	74108	0	0	0	0	0	0	0	0	0	28	0	0	0	0	0	0	0	0	0	2646.72	0	0	0	0	0	0	0
982	San Luis Río Colorado	Mexico	Central America	4.38744e+07	-10353432	3929114	North America	83995	0	0	0	0	56061	27934	0	0	0	0	0	0	0	0	28.2131	15.7869	0	0	0	0	0	0	0	0	1987.06	1769.44	0	0	0	0
999	Santa Lucía Cotzumalguapa	Guatemala	Central America	6.95885e+06	-8946071	1765643	North America	52059.4	0	0	0	0	0	0	0	46236.4	5822.99	0	0	0	0	0	0	0	0	6.33171	0.668288	0	0	0	0	0	0	0	0	7302.36	8713.29	0
983	San Miguel	El Salvador	Central America	2.18686e+07	-8686682	1661136	North America	136358	0	0	0	0	0	0	0	0	49967.9	86389.6	0	0	0	0	0	0	0	0	9.00636	12.9936	0	0	0	0	0	0	0	0	5548.07	6648.61
680	Manisa	Turkey	Western Asia	1.99701e+07	2356000	4634200	Asia	115507	106883	0	0	0	0	0	0	0	0	0	15.6406	0	0	0	0	0	0	0	0	0	6833.69	0	0	0	0	0	0	0	0	0
782	Nakuru	Kenya	Eastern Africa	2.08594e+07	3614643	-36452	Africa	78138.7	0	0	0	0	0	0	0	0	63620.6	14518.1	0	0	0	0	0	0	0	0	14.2633	6.73668	0	0	0	0	0	0	0	0	4460.43	2155.09
853	Pakokku	Myanmar	South-Eastern Asia	9.95068e+06	9119900	2614600	Asia	62713.4	0	0	0	0	7784.48	54929	0	0	0	0	0	0	0	0	2.3258	7.6742	0	0	0	0	0	0	0	0	3347	7157.62	0	0	0	0
1038	Sidiangkat	Indonesia	South-Eastern Asia	1.192e+07	9846833	339333	Asia	80692.8	0	0	0	0	0	80692.8	0	0	0	0	0	0	0	0	0	12	0	0	0	0	0	0	0	0	0	6724.4	0	0	0	0
380	Gonghuakeng	Taiwan	Eastern Asia	1.49354e+07	11442433	3060833	Asia	60329.7	0	0	0	0	0	0	0	53686.8	6642.94	0	0	0	0	0	0	0	0	13.4415	1.55851	0	0	0	0	0	0	0	0	3994.11	4262.36	0
1148	Tosu	Japan	Eastern Asia	2.69283e+07	11697981	4037574	Asia	82601.6	0	0	75666.8	6934.82	0	0	0	0	0	0	0	0	23.3052	3.69481	0	0	0	0	0	0	0	0	3246.78	1876.91	0	0	0	0	0	0
708	Mbouda	Cameroon	Middle Africa	1.19212e+07	1024750	694917	Africa	56039	0	0	56039	0	0	0	0	0	0	0	0	0	12	0	0	0	0	0	0	0	0	0	4669.92	0	0	0	0	0	0	0
710	Medan	Indonesia	South-Eastern Asia	4.43038e+08	9875554	444787	Asia	2.6235e+06	0	0	0	33624.8	255069	1.78061e+06	554196	0	0	0	0	0	0	12.8421	61.7134	258.583	112.861	0	0	0	0	0	0	2618.32	4133.12	6886.03	4910.42	0	0	0
468	Isahaya	Japan	Eastern Asia	3.39058e+07	11699059	3974324	Asia	118191	0	0	0	0	0	0	11804.5	106387	0	0	0	0	0	0	0	0	3.31094	30.6891	0	0	0	0	0	0	0	0	3565.32	3466.6	0	0
109	Bafoussam	Cameroon	Middle Africa	3.67568e+07	1040716	677824	Africa	161351	0	161351	0	0	0	0	0	0	0	0	0	37	0	0	0	0	0	0	0	0	0	4360.83	0	0	0	0	0	0	0	0
778	Nairobi	Kenya	Eastern Africa	2.36408e+08	3690500	-156941	Africa	1113678	0	0	0	383353	515540	171755	43029.5	0	0	0	0	0	0	73.8671	96.9205	47.3143	19.8981	0	0	0	0	0	0	5189.77	5319.21	3630.08	2162.49	0	0	0
1056	Stabat	Indonesia	South-Eastern Asia	1.58938e+07	9854688	463625	Asia	116781	0	0	0	0	116781	0	0	0	0	0	0	0	0	0	16	0	0	0	0	0	0	0	0	0	7298.8	0	0	0	0	0
231	Chitose	Japan	Eastern Asia	1.69912e+07	11704853	5103735	Asia	55995.1	0	0	0	0	0	0	15.2773	55979.8	0	0	0	0	0	0	0	0	0.235838	16.7642	0	0	0	0	0	0	0	0	64.779	3339.25	0	0
824	Olongapo	Philippines	South-Eastern Asia	2.38603e+07	11806042	1827000	Asia	180287	0	0	0	0	0	0	174569	5717.61	0	0	0	0	0	0	0	0	21.7662	2.23376	0	0	0	0	0	0	0	0	8020.19	2559.64	0	0
106	Babahoyo	Ecuador	South America	1.19198e+07	-7967833	-223000	South America	54183.1	0	54183.1	0	0	0	0	0	0	0	0	0	12	0	0	0	0	0	0	0	0	0	4515.26	0	0	0	0	0	0	0	0
856	Palmira	Colombia	South America	2.18538e+07	-7637864	436682	South America	155803	0	0	155803	0	0	0	0	0	0	0	0	0	22	0	0	0	0	0	0	0	0	0	7081.93	0	0	0	0	0	0	0
627	Liège	Belgium	Western Europe	1.09142e+08	419555	5939784	Europe	332010	10663.3	0	0	0	0	0	0	0	0	0	4.27098	0	0	0	0	0	0	0	0	0	2496.69	0	0	0	0	0	0	0	0	0
504	Kabanjahe	Indonesia	South-Eastern Asia	9.93345e+06	9862500	383900	Asia	65404.6	0	0	0	0	0	0	0	0	65404.6	0	0	0	0	0	0	0	0	0	10	0	0	0	0	0	0	0	0	0	6540.46	0
599	Kurume	Japan	Eastern Asia	3.78985e+07	11704395	4028605	Asia	168920	0	0	0	168920	0	0	0	0	0	0	0	0	0	38	0	0	0	0	0	0	0	0	0	4445.27	0	0	0	0	0	0
1099	Tarlac City	Philippines	South-Eastern Asia	3.08219e+07	11813758	1904726	Asia	105600	0	0	0	0	293.945	105306	0	0	0	0	0	0	0	0	0.469092	30.5309	0	0	0	0	0	0	0	0	626.626	3449.15	0	0	0	0
332	Escuintla	Guatemala	Central America	1.39176e+07	-8923429	1761286	North America	56419.8	0	0	0	0	0	0	0	5969.39	50450.5	0	0	0	0	0	0	0	0	2.03125	11.9687	0	0	0	0	0	0	0	0	2938.77	4215.18	0
974	San Carlos de Bariloche	Argentina	South America	1.89827e+07	-5991026	-4917500	South America	54355.6	0	0	0	0	11264.7	43091	0	0	0	0	0	0	0	0	3.81765	15.1824	0	0	0	0	0	0	0	0	2950.68	2838.23	0	0	0	0
1171	Ube	Japan	Eastern Asia	3.29164e+07	11714652	4102318	Asia	53351.7	0	0	0	53351.7	0	0	0	0	0	0	0	0	0	33	0	0	0	0	0	0	0	0	0	1616.72	0	0	0	0	0	0
797	Neuwied	Germany	Western Europe	2.50314e+07	562860	5918580	Europe	52251.3	0	0	0	0	38768	13483.3	0	0	0	0	0	0	0	0	19.0468	5.95317	0	0	0	0	0	0	0	0	2035.4	2264.9	0	0	0	0
595	Kumbo	Cameroon	Middle Africa	1.78823e+07	1066389	767611	Africa	81954	0	0	0	0	0	0	0	63253.6	18700.4	0	0	0	0	0	0	0	0	10.3898	7.61025	0	0	0	0	0	0	0	0	6088.08	2457.26	0
1077	Tabora	Tanzania	Eastern Africa	2.58286e+07	3280808	-620308	Africa	82861.4	67269.9	0	0	0	0	0	0	0	0	0	19.0516	0	0	0	0	0	0	0	0	0	3530.92	0	0	0	0	0	0	0	0	0
58	Antananarivo	Madagascar	Eastern Africa	9.44964e+07	4604584	-2317847	Africa	511032	323264	187768	0	0	0	0	0	0	0	0	49.7341	45.2659	0	0	0	0	0	0	0	0	6499.86	4148.11	0	0	0	0	0	0	0	0
648	Lubuk Pakam	Indonesia	South-Eastern Asia	1.49004e+07	9897633	440033	Asia	60974.1	0	0	0	0	60974.1	0	0	0	0	0	0	0	0	0	15	0	0	0	0	0	0	0	0	0	4064.94	0	0	0	0	0
767	Muroran	Japan	Eastern Asia	7.79508e+07	11709359	5050385	Asia	141512	0	0	0	0	0	0	0	63084	71802.1	6626.42	0	0	0	0	0	0	0	45.2151	30.7699	2.01509	0	0	0	0	0	0	0	1395.2	2333.52	3288.4
57	Angeles	Philippines	South-Eastern Asia	1.22288e+08	11829654	1861915	Asia	426840	0	0	0	0	0	38316.7	159167	229356	0	0	0	0	0	0	0	11.9835	47.1238	63.8927	0	0	0	0	0	0	0	3197.45	3377.63	3589.71	0	0
932	Quevedo	Ecuador	South America	2.28461e+07	-7963500	-126239	South America	89652	0	0	0	89652	0	0	0	0	0	0	0	0	0	23	0	0	0	0	0	0	0	0	0	3897.91	0	0	0	0	0	0
1165	Tuluá	Colombia	South America	1.39072e+07	-7624929	505143	South America	107905	41046.9	0	0	0	0	0	0	0	0	0	5.44523	0	0	0	0	0	0	0	0	0	7538.14	0	0	0	0	0	0	0	0	0
342	Foumban	Cameroon	Middle Africa	1.78819e+07	1088611	707778	Africa	112088	0	0	112022	66.7312	0	0	0	0	0	0	0	0	17.9457	0.0542873	0	0	0	0	0	0	0	0	6242.25	1229.22	0	0	0	0	0	0
771	Myingyan	Myanmar	South-Eastern Asia	9.95087e+06	9145300	2629000	Asia	53245.1	0	0	0	46684.2	6560.92	0	0	0	0	0	0	0	0	8.05645	1.94355	0	0	0	0	0	0	0	0	5794.63	3375.74	0	0	0	0	0
1035	Sibolga	Indonesia	South-Eastern Asia	1.39064e+07	9897643	214643	Asia	63143.4	63143.4	0	0	0	0	0	0	0	0	0	14	0	0	0	0	0	0	0	0	0	4510.24	0	0	0	0	0	0	0	0	0
1239	Yilan City	Taiwan	Eastern Asia	2.28997e+07	11495935	3023630	Asia	115161	0	0	0	0	0	0	0	114352	808.445	0	0	0	0	0	0	0	0	21.6742	1.32583	0	0	0	0	0	0	0	0	5275.96	609.765	0
389	Guatemala City	Guatemala	Central America	3.15146e+08	-8892970	1797724	North America	1.3765e+06	0	0	0	0	0	0	371374	600339	397165	7618.44	0	0	0	0	0	0	78.699	150.237	85.7213	2.34312	0	0	0	0	0	0	4718.92	3995.96	4633.21	3251.4
1006	Santo Domingo de los Tsachilas	Ecuador	South America	2.18527e+07	-7935409	-31955	South America	73189.5	0	0	0	72557.4	632.066	0	0	0	0	0	0	0	0	21.5748	0.425201	0	0	0	0	0	0	0	0	3363.06	1486.51	0	0	0	0	0
665	Magway	Myanmar	South-Eastern Asia	1.39284e+07	9150357	2471643	Asia	58402.1	58092.9	309.117	0	0	0	0	0	0	0	0	13.5485	0.451526	0	0	0	0	0	0	0	0	4287.79	684.604	0	0	0	0	0	0	0	0
654	Luodong	Taiwan	Eastern Asia	2.09082e+07	11501881	3014595	Asia	105275	0	0	0	0	0	0	0	105275	0	0	0	0	0	0	0	0	0.00192163	20.9981	0	0	0	0	0	0	0	0	0	5013.57	0	0
203	Cartago	Colombia	South America	9.93397e+06	-7592100	586500	South America	86060.1	0	0	0	82860.2	3199.88	0	0	0	0	0	0	0	0	9.0458	0.954199	0	0	0	0	0	0	0	0	9160.07	3353.47	0	0	0	0	0
439	Hualien	Taiwan	Eastern Asia	7.2672e+07	11525295	2932596	Asia	190787	45722.9	0	0	0	0	0	0	0	0	0	28.8634	0	0	0	0	0	0	0	0	0	1584.11	0	0	0	0	0	0	0	0	0
1143	Tomakomai	Japan	Eastern Asia	5.4969e+07	11724645	5081973	Asia	126894	0	0	0	0	0	0	0	47217.4	79677.1	0	0	0	0	0	0	0	0	25.8278	29.1722	0	0	0	0	0	0	0	0	1828.16	2731.26	0
890	Pereira	Colombia	South America	4.27162e+07	-7570174	595221	South America	300578	0	0	0	0	0	43966.2	256612	0	0	0	0	0	0	0	0	9.27898	33.721	0	0	0	0	0	0	0	0	4738.25	7609.85	0	0	0
1169	Turgutlu	Turkey	Western Asia	7.98783e+06	2384500	4621000	Asia	54230.4	0	0	54230.3	0.17446	0	0	0	0	0	0	0	0	7.9904	0.00960063	0	0	0	0	0	0	0	0	6786.93	18.1717	0	0	0	0	0	0
1131	Thika	Kenya	Eastern Africa	1.39063e+07	3716929	-129786	Africa	53001	0	0	52997.4	3.6424	0	0	0	0	0	0	0	0	13.8766	0.12339	0	0	0	0	0	0	0	0	3819.19	29.5194	0	0	0	0	0	0
5	Abha	Saudi Arabia	Western Asia	2.88436e+07	4128052	2238086	Asia	134764	134563	0	0	0	0	0	0	0	0	0	28.3164	0	0	0	0	0	0	0	0	0	4752.14	0	0	0	0	0	0	0	0	0
145	Bayt al Faqih	Yemen	Western Asia	5.96485e+06	4256000	1787500	Asia	67278	0	67278	0	0	0	0	0	0	0	0	0	6	0	0	0	0	0	0	0	0	0	11213	0	0	0	0	0	0	0	0
826	Omuta	Japan	Eastern Asia	6.78141e+07	11721559	3994735	Asia	154030	0	0	0	0	0	0	105303	48726.7	0	0	0	0	0	0	0	0	41.6025	26.3975	0	0	0	0	0	0	0	0	2531.17	1845.88	0	0
679	Manila	Philippines	South-Eastern Asia	1.45743e+09	11882100	1797717	Asia	11635922	0	73068	1696028	4.5438e+06	3.21809e+06	1.26754e+06	522312	231130	83954	0	0	19	226.911	336.623	355.121	291.103	126.558	77.6508	33.0328	0	0	3845.68	7474.41	13498.2	9061.95	4354.25	4127.06	2976.53	2541.54	0
1190	Vallejo	United States of America	Northern America	6.0902e+07	-10556057	4578205	North America	98994.6	5759.88	0	0	0	0	0	0	0	0	0	7.17271	0	0	0	0	0	0	0	0	0	803.028	0	0	0	0	0	0	0	0	0
947	Riobamba	Ecuador	South America	2.48329e+07	-7880380	-206140	South America	103855	0	0	0	0	0	0	0	0	103855	0	0	0	0	0	0	0	0	0	25	0	0	0	0	0	0	0	0	0	4154.18	0
1005	Santiago	Chile	South America	5.63512e+08	-6326866	-4049035	South America	3.83788e+06	10865	1.28389e+06	2.11591e+06	427218	0	0	0	0	0	0	2.51505	177.787	284.764	99.9331	0	0	0	0	0	0	4320	7221.5	7430.39	4275.04	0	0	0	0	0	0
576	Koblenz	Germany	Western Europe	4.10507e+07	574695	5910207	Europe	110858	0	0	0	5091.41	105767	0	0	0	0	0	0	0	0	1.73431	39.2657	0	0	0	0	0	0	0	0	2935.7	2693.62	0	0	0	0	0
24	Akhisar	Turkey	Western Asia	8.98718e+06	2387167	4668500	Asia	57038.5	0	0	40217.3	16821.2	0	0	0	0	0	0	0	0	5.92666	3.07334	0	0	0	0	0	0	0	0	6785.82	5473.28	0	0	0	0	0	0
707	Mbeya	Tanzania	Eastern Africa	3.77577e+07	3327868	-1099921	Africa	96849.8	0	0	0	0	0	0	0	0	96849.8	0	0	0	0	0	0	0	0	0	38	0	0	0	0	0	0	0	0	0	2548.68	0
887	Pematang Siantar	Indonesia	South-Eastern Asia	4.17203e+07	9921881	366167	Asia	367184	0	0	0	0	22563	344621	0	0	0	0	0	0	0	0	7.06143	34.9386	0	0	0	0	0	0	0	0	3195.25	9863.64	0	0	0	0
477	Izumo	Japan	Eastern Asia	3.29266e+07	11722894	4265015	Asia	100346	0	0	0	0	0	0	2943.95	97402.2	0	0	0	0	0	0	0	0	2.18947	30.8105	0	0	0	0	0	0	0	0	1344.59	3161.33	0	0
116	Balanga	Philippines	South-Eastern Asia	2.08774e+07	11837167	1807024	Asia	61928.9	0	0	0	0	61928.9	0	0	0	0	0	0	0	0	0	21	0	0	0	0	0	0	0	0	0	2949	0	0	0	0	0
51	Ambato	Ecuador	South America	3.97325e+07	-7878500	-155375	South America	118376	0	0	0	0	0	0	79310.3	39066.1	0	0	0	0	0	0	0	0	21.9599	18.0401	0	0	0	0	0	0	0	0	3611.6	2165.51	0	0
1109	Tebing Tinggi	Indonesia	South-Eastern Asia	3.07939e+07	9927435	412629	Asia	164542	0	0	160080	4462.13	0	0	0	0	0	0	0	0	28.518	2.48197	0	0	0	0	0	0	0	0	5613.29	1797.82	0	0	0	0	0	0
430	Hofu	Japan	Eastern Asia	3.8902e+07	11735321	4113115	Asia	112276	0	0	0	0	25501.8	86774.5	0	0	0	0	0	0	0	0	13.37	25.63	0	0	0	0	0	0	0	0	1907.39	3385.66	0	0	0	0
18	Agadez	Niger	Western Africa	1.5911e+07	778812	2086688	Africa	94012.1	94012.1	0	0	0	0	0	0	0	0	0	16	0	0	0	0	0	0	0	0	0	5875.76	0	0	0	0	0	0	0	0	0
958	Sabya	Saudi Arabia	Western Asia	9.94463e+06	4154800	2108700	Asia	54790.4	0	0	0	0	0	0	0	54790.4	0	0	0	0	0	0	0	0	0	10	0	0	0	0	0	0	0	0	0	5479.04	0	0
844	Padang Sidempuan	Indonesia	South-Eastern Asia	1.98663e+07	9947700	171100	Asia	123054	0	119351	3703	0	0	0	0	0	0	0	0	18.6661	1.33393	0	0	0	0	0	0	0	0	6394.03	2776	0	0	0	0	0	0	0
698	Matsue	Japan	Eastern Asia	2.79383e+07	11742000	4276107	Asia	56890.7	0	0	0	0	56890.7	0	0	0	0	0	0	0	0	0	28	0	0	0	0	0	0	0	0	0	2031.81	0	0	0	0	0
935	Quito	Ecuador	South America	2.23494e+08	-7866771	-21936	South America	996782	0	0	0	0	0	0	0	0	930655	66126.7	0	0	0	0	0	0	0	0	199.87	25.13	0	0	0	0	0	0	0	0	4656.3	2631.39
77	Armenia	Colombia	South America	2.58281e+07	-7570423	560538	South America	179062	0	0	0	0	0	0	178919	142.727	0	0	0	0	0	0	0	0	25.7112	0.288794	0	0	0	0	0	0	0	0	6958.79	494.218	0	0
7	Abu `Arish	Saudi Arabia	Western Asia	8.94995e+06	4176167	2086389	Asia	83025.7	0	0	0	0	0	0	0	0	3430.41	79595.3	0	0	0	0	0	0	0	0	0.790982	8.20902	0	0	0	0	0	0	0	0	4336.91	9696.08
561	Kisaran	Indonesia	South-Eastern Asia	2.48335e+07	9977900	368140	Asia	171819	163867	0	0	0	0	0	0	0	0	0	22.5467	0	0	0	0	0	0	0	0	0	7267.91	0	0	0	0	0	0	0	0	0
404	Hakodate	Japan	Eastern Asia	7.99391e+07	11750838	4988938	Asia	347595	0	0	0	0	0	0	178102	169493	0	0	0	0	0	0	0	0	42.8291	37.1709	0	0	0	0	0	0	0	0	4158.44	4559.83	0	0
1093	Talca	Chile	South America	2.79381e+07	-6324357	-4272500	South America	124669	0	123257	1412.16	0	0	0	0	0	0	0	0	27.0041	0.995895	0	0	0	0	0	0	0	0	4564.37	1417.99	0	0	0	0	0	0	0
720	Mellit	Sudan	Northern Africa	9.94099e+06	2512200	1740700	Africa	51264.1	0	0	0	3666.87	47597.3	0	0	0	0	0	0	0	0	1.1032	8.8968	0	0	0	0	0	0	0	0	3323.83	5349.94	0	0	0	0	0
969	Samitah	Saudi Arabia	Western Asia	8.94952e+06	4191278	2040389	Asia	59725.4	0	0	0	0	59725.4	0	0	0	0	0	0	0	0	0	9	0	0	0	0	0	0	0	0	0	6636.15	0	0	0	0	0
867	Panyabungan	Indonesia	South-Eastern Asia	9.93309e+06	9977700	106800	Asia	97634.4	0	0	0	0	0	0	0	19313	78321.4	0	0	0	0	0	0	0	0	4.1445	5.8555	0	0	0	0	0	0	0	0	4659.9	13375.7	0
1034	Shunan	Japan	Eastern Asia	6.78291e+07	11757338	4113059	Asia	209024	0	0	0	36001.2	169605	3418.31	0	0	0	0	0	0	0	14.2674	52.7647	0.967949	0	0	0	0	0	0	0	2523.32	3214.36	3531.5	0	0	0	0
267	Curicó	Chile	South America	1.19723e+07	-6309500	-4221500	South America	52351	0	0	0	52351	0	0	0	0	0	0	0	0	0	12	0	0	0	0	0	0	0	0	0	4362.59	0	0	0	0	0	0
104	Aydin	Turkey	Western Asia	1.39766e+07	2409357	4546929	Asia	97359.7	1364.74	0	0	0	0	0	0	0	0	0	0.962661	0	0	0	0	0	0	0	0	0	1417.67	0	0	0	0	0	0	0	0	0
593	Kumamoto	Japan	Eastern Asia	1.44597e+08	11765010	3971086	Asia	520164	0	0	0	0	0	0	434962	85201.2	0	0	0	0	0	0	0	0	111.901	33.0991	0	0	0	0	0	0	0	0	3887.03	2574.12	0	0
450	Ibarra	Ecuador	South America	1.78795e+07	-7829500	42778	South America	68299.8	0	0	0	0	0	0	0	0	60498.1	7801.77	0	0	0	0	0	0	0	0	15.0106	2.98938	0	0	0	0	0	0	0	0	4030.35	2609.83
1243	Yonago	Japan	Eastern Asia	4.98897e+07	11768160	4274400	Asia	154848	0	0	153864	984.43	0	0	0	0	0	0	0	0.00669297	48.6968	1.29653	0	0	0	0	0	0	0	0	3159.63	759.279	0	0	0	0	0	0
193	Cabanatuan	Philippines	South-Eastern Asia	1.59081e+07	11850000	1906250	Asia	66174.1	0	773.172	65401	0	0	0	0	0	0	0	0	0.143068	15.8569	0	0	0	0	0	0	0	0	5404.23	4124.44	0	0	0	0	0	0	0
223	Chillán	Chile	South America	2.29552e+07	-6305587	-4407457	South America	115640	0	0	86897.2	28743	0	0	0	0	0	0	0	0	17.0368	5.96319	0	0	0	0	0	0	0	0	5100.56	4820.07	0	0	0	0	0	0
568	Kitami	Japan	Eastern Asia	2.89916e+07	11771259	5210121	Asia	112136	0	0	0	0	2093.13	110042	0	0	0	0	0	0	0	0	0.523597	28.4764	0	0	0	0	0	0	0	0	3997.6	3864.34	0	0	0	0
1124	Tepic	Mexico	Central America	4.07989e+07	-10053549	2634939	North America	133988	0	0	0	0	0	0	0	16416.1	117572	0	0	0	0	0	0	0	0	5.2358	35.7642	0	0	0	0	0	0	0	0	3135.36	3287.43	0
681	Manizales	Colombia	South America	3.87429e+07	-7548192	624885	South America	310359	0	0	0	0	0	0	0	283940	26419.4	0	0	0	0	0	0	0	0	31.6981	7.30189	0	0	0	0	0	0	0	0	8957.63	3618.16	0
938	Rancagua	Chile	South America	2.69329e+07	-6303352	-4127574	South America	133405	0	0	0	133405	0	0	0	0	0	0	0	0	0	27	0	0	0	0	0	0	0	0	0	4940.91	0	0	0	0	0	0
821	Ödemis	Turkey	Western Asia	7.98734e+06	2413375	4590625	Asia	58920	0	0	0	58493	427.053	0	0	0	0	0	0	0	0	7.44501	0.554992	0	0	0	0	0	0	0	0	7856.67	769.477	0	0	0	0	0
714	Meiktila	Myanmar	South-Eastern Asia	1.99e+07	9212400	2560400	Asia	63192.9	0	0	0	63192.9	0	0	0	0	0	0	0	0	0	20	0	0	0	0	0	0	0	0	0	3159.65	0	0	0	0	0	0
425	Hiroshima	Japan	Eastern Asia	2.88296e+08	11782458	4154804	Asia	1.27573e+06	2275.62	732838	513441	27171.6	0	0	0	0	0	0	3.96227	138.26	137.967	8.80998	0	0	0	0	0	0	574.324	5300.42	3721.46	3084.18	0	0	0	0	0	0
254	Colima	Mexico	Central America	3.18321e+07	-10032406	2362344	North America	78259.3	0	0	0	0	0	0	74106.8	4152.47	0	0	0	0	0	0	0	0	29.6018	2.39822	0	0	0	0	0	0	0	0	2503.46	1731.48	0	0
795	Neiva	Colombia	South America	2.68202e+07	-7538463	362796	South America	174537	0	174537	0	0	0	0	0	0	0	0	0	27	0	0	0	0	0	0	0	0	0	6464.34	0	0	0	0	0	0	0	0
1213	Wiesbaden	Germany	Western Europe	1.00116e+08	627110	5876500	Europe	331525	123203	0	0	0	0	0	0	0	0	0	33.4011	0	0	0	0	0	0	0	0	0	3688.59	0	0	0	0	0	0	0	0	0
1236	Yatsushiro	Japan	Eastern Asia	2.89176e+07	11777776	3935741	Asia	87165.7	0	0	0	0	0	55320.9	31844.7	0	0	0	0	0	0	0	0	17.3322	11.6678	0	0	0	0	0	0	0	0	3191.81	2729.27	0	0	0
244	Ciudad Guzmán	Mexico	Central America	1.59171e+07	-9990438	2417375	North America	75044.8	0	0	0	0	0	0	0	75044.8	0	0	0	0	0	0	0	0	0	16	0	0	0	0	0	0	0	0	0	4690.3	0	0
968	Salihli	Turkey	Western Asia	8.98628e+06	2422944	4619167	Asia	64804.3	0	0	0	0	0	0	64804.3	0	0	0	0	0	0	0	0	0	9	0	0	0	0	0	0	0	0	0	7200.48	0	0	0
475	Iwakuni	Japan	Eastern Asia	6.38409e+07	11782516	4127672	Asia	152821	0	0	152821	0	0	0	0	0	0	0	0	0	64	0	0	0	0	0	0	0	0	0	2387.83	0	0	0	0	0	0	0
1119	Temuco	Chile	South America	2.89575e+07	-6235776	-4647534	South America	119690	0	79.2734	119611	0	0	0	0	0	0	0	0	0.0944859	28.9055	0	0	0	0	0	0	0	0	838.997	4137.99	0	0	0	0	0	0	0
843	Padang	Indonesia	South-Eastern Asia	1.56943e+08	10059722	-113728	Asia	666415	0	0	0	0	0	72186.2	493419	100810	0	0	0	0	0	0	0	23.5081	102.822	31.6699	0	0	0	0	0	0	0	3070.69	4798.77	3183.14	0	0
156	Beppu	Japan	Eastern Asia	4.38825e+07	11791023	4029568	Asia	131785	0	0	0	0	0	0	0	0	74235.1	57549.5	0	0	0	0	0	0	0	0	28.1417	15.8583	0	0	0	0	0	0	0	0	2637.91	3628.97
449	Ibagué	Colombia	South America	3.57619e+07	-7523028	549139	South America	261598	0	0	0	0	0	0	0	113194	148404	0	0	0	0	0	0	0	0	23.0339	12.9661	0	0	0	0	0	0	0	0	4914.21	11445.6	0
183	Bukittinggi	Indonesia	South-Eastern Asia	3.17858e+07	10060969	-38344	Asia	213854	0	0	0	0	0	0	0	0	139020	74833.6	0	0	0	0	0	0	0	0	21.2921	10.7079	0	0	0	0	0	0	0	0	6529.19	6988.66
769	Musan	North Korea	Eastern Asia	6.99538e+06	10743643	5036643	Asia	80721.7	80426.4	0	0	0	0	0	0	0	0	0	6.75223	0	0	0	0	0	0	0	0	0	11911.1	0	0	0	0	0	0	0	0	0
488	Jeju-si	South Korea	Eastern Asia	3.29132e+07	11329833	4051500	Asia	149315	0	0	0	0	0	0	0	513.703	148801	0	0	0	0	0	0	0	0	1.45651	31.5435	0	0	0	0	0	0	0	0	352.695	4717.34	0
597	Kure	Japan	Eastern Asia	2.29432e+07	11806370	4135761	Asia	113432	101611	0	0	0	0	0	0	0	0	0	21.1329	0	0	0	0	0	0	0	0	0	4808.2	0	0	0	0	0	0	0	0	0
834	Osorno	Chile	South America	2.09781e+07	-6178071	-4853976	South America	82342.3	0	33549	48793.3	0	0	0	0	0	0	0	0	9.54626	11.4537	0	0	0	0	0	0	0	0	3514.36	4260.03	0	0	0	0	0	0	0
789	Nazilli	Turkey	Western Asia	9.98347e+06	2450600	4555100	Asia	75463.4	0	0	75463.4	0	0	0	0	0	0	0	0	0	10	0	0	0	0	0	0	0	0	0	7546.34	0	0	0	0	0	0	0
89	Arusha	Tanzania	Eastern Africa	4.17208e+07	3672262	-416429	Africa	96738.1	0	0	0	0	0	0	0	3638.05	93100	0	0	0	0	0	0	0	0	2.36667	39.6333	0	0	0	0	0	0	0	0	1537.21	2349.03	0
822	Oita	Japan	Eastern Asia	9.97314e+07	11810980	4021050	Asia	221124	0	0	0	0	0	0	11489.2	179029	30605.8	0	0	0	0	0	0	0	13.6592	75.0055	11.3352	0	0	0	0	0	0	0	841.131	2386.87	2700.06	0
916	Puerto Montt	Chile	South America	1.49875e+07	-6109767	-4952900	South America	67406.5	0	0	0	0	0	0	54747.2	12659.3	0	0	0	0	0	0	0	0	11.5166	3.48337	0	0	0	0	0	0	0	0	4753.75	3634.22	0	0
143	Batusangkar	Indonesia	South-Eastern Asia	1.09264e+07	10080500	-56500	Asia	53368	0	0	0	0	0	0	0	0	53368	0	0	0	0	0	0	0	0	0	11	0	0	0	0	0	0	0	0	0	4851.64	0
447	Hyesan	North Korea	Eastern Asia	1.39881e+07	10744500	4946071	Asia	145757	0	0	0	145757	0	0	0	0	0	0	0	0	0	14	0	0	0	0	0	0	0	0	0	10411.2	0	0	0	0	0	0
819	Obihiro	Japan	Eastern Asia	5.09747e+07	11821265	5113735	Asia	154856	0	0	0	1190.55	153666	0	0	0	0	0	0	0	0	0.780446	50.2196	0	0	0	0	0	0	0	0	1525.47	3059.88	0	0	0	0	0
317	Durango	Mexico	Central America	8.36232e+07	-9916393	2937357	North America	339889	0	0	0	0	0	0	3281.34	287643	48964.4	0	0	0	0	0	0	0	2.07607	69.7145	12.2094	0	0	0	0	0	0	0	1580.55	4126.02	4010.38	0
246	Ciudad Real	Spain	Southern Europe	6.99013e+06	-336786	4675500	Europe	50613.5	0	0	0	0	0	0	0	0	50613.5	0	0	0	0	0	0	0	0	0	7	0	0	0	0	0	0	0	0	0	7230.5	0
757	Moshi	Tanzania	Eastern Africa	1.88737e+07	3738342	-415395	Africa	62803.2	0	0	0	62803.2	0	0	0	0	0	0	0	0	0	19	0	0	0	0	0	0	0	0	0	3305.43	0	0	0	0	0	0
883	Payakumbuh	Indonesia	South-Eastern Asia	1.58929e+07	10085250	-28375	Asia	58603.2	0	0	0	0	0	0	0	58603.2	0	0	0	0	0	0	0	0	0	16	0	0	0	0	0	0	0	0	0	3662.7	0	0
416	Heerlen	Netherlands	Western Europe	7.41009e+07	450568	5967419	Europe	213961	78106.3	0	0	0	0	0	0	0	0	0	30.6376	0	0	0	0	0	0	0	0	0	2549.36	0	0	0	0	0	0	0	0	0
702	Mawza`	Yemen	Western Asia	2.98202e+06	4288167	1634833	Asia	51271.1	51271.1	0	0	0	0	0	0	0	0	0	3	0	0	0	0	0	0	0	0	0	17090.4	0	0	0	0	0	0	0	0	0
507	Kagoshima	Japan	Eastern Asia	1.21629e+08	11846639	3827131	Asia	465037	0	0	0	0	0	0	0	0	413904	51133	0	0	0	0	0	0	0	0	102.583	19.4172	0	0	0	0	0	0	0	0	4034.82	2633.39
160	Binangonan	Philippines	South-Eastern Asia	2.68417e+07	11907241	1783315	Asia	111667	0	0	0	0	0	95486	16181	0	0	0	0	0	0	0	0	20.7853	6.2147	0	0	0	0	0	0	0	0	4593.92	2603.66	0	0	0
269	Cusco	Peru	South America	4.27435e+07	-7087035	-1666988	South America	215025	193753	21271.8	0	0	0	0	0	0	0	0	31.8863	11.1137	0	0	0	0	0	0	0	0	6076.38	1914.01	0	0	0	0	0	0	0	0
22	Aira	Japan	Eastern Asia	2.59218e+07	11842962	3845231	Asia	71135.9	0	0	0	0	0	0	0	0	0	71135.9	0	0	0	0	0	0	0	0	0	26	0	0	0	0	0	0	0	0	0	2736
139	Batangas City	Philippines	South-Eastern Asia	2.68396e+07	11916796	1695648	Asia	88775.2	0	0	0	0	0	0	15972.6	72802.6	0	0	0	0	0	0	0	0	4.59648	22.4035	0	0	0	0	0	0	0	0	3474.96	3249.61	0	0
73	Arequipa	Peru	South America	7.65664e+07	-6986604	-2018825	South America	425569	0	0	0	0	0	0	0	101400	324168	0	0	0	0	0	0	0	0	23.4669	53.5331	0	0	0	0	0	0	0	0	4320.99	6055.48	0
126	Bangkinang	Indonesia	South-Eastern Asia	8.93975e+06	10124611	42167	Asia	68660.1	23316.3	0	0	0	0	0	0	0	0	0	3.3661	0	0	0	0	0	0	0	0	0	6926.81	0	0	0	0	0	0	0	0	0
353	Fukuyama	Japan	Eastern Asia	7.98065e+07	11860575	4163475	Asia	145246	24820.3	0	0	0	0	0	0	0	0	0	16.5922	0	0	0	0	0	0	0	0	0	1495.9	0	0	0	0	0	0	0	0	0
373	Girardot	Colombia	South America	1.68875e+07	-7483618	531735	South America	74426.9	0	0	7159.04	67267.9	0	0	0	0	0	0	0	0	2.73885	14.2612	0	0	0	0	0	0	0	0	2613.89	4716.86	0	0	0	0	0	0
828	Onomichi	Japan	Eastern Asia	5.28711e+07	11849292	4156726	Asia	101680	101680	0	0	0	0	0	0	0	0	0	53	0	0	0	0	0	0	0	0	0	1918.49	0	0	0	0	0	0	0	0	0
633	Lipa	Philippines	South-Eastern Asia	2.28638e+07	11919717	1717457	Asia	66238.8	0	0	0	0	0	0	0	2866.66	63372.2	0	0	0	0	0	0	0	0	1.30308	21.6969	0	0	0	0	0	0	0	0	2199.92	2920.79	0
892	Perpignan	France	Western Europe	2.39868e+07	239125	5088958	Europe	85014.2	0	0	685.898	84328.3	0	0	0	0	0	0	0	0	0.800404	23.1996	0	0	0	0	0	0	0	0	856.94	3634.9	0	0	0	0	0	0
1	`Amran	Yemen	Western Asia	9.94275e+06	4302000	1926700	Asia	54385.7	0	0	0	0	0	0	0	996.281	53389.4	0	0	0	0	0	0	0	0	0.571329	9.42867	0	0	0	0	0	0	0	0	1743.79	5662.45	0
559	Kirishima	Japan	Eastern Asia	3.68889e+07	11852959	3846635	Asia	101286	0	0	0	0	0	0	0	0	101286	0	0	0	0	0	0	0	0	0	37	0	0	0	0	0	0	0	0	0	2737.46	0
248	Clermont-Ferrand	France	Western Europe	5.10088e+07	248127	5424657	Europe	182877	0	0	0	0	0	0	0	0	64988.9	117888	0	0	0	0	0	0	0	0	23.8019	27.1981	0	0	0	0	0	0	0	0	2730.41	4334.41
292	Denizli	Turkey	Western Asia	3.09478e+07	2519435	4539629	Asia	222021	18353.5	0	0	0	0	0	0	0	0	0	4.39125	0	0	0	0	0	0	0	0	0	4179.57	0	0	0	0	0	0	0	0	0
63	Aomori	Japan	Eastern Asia	4.99507e+07	11862400	4881080	Asia	169704	0	0	0	0	0	0	0	118928	50775.3	0	0	0	0	0	0	0	0	36.2866	13.7134	0	0	0	0	0	0	0	0	3277.48	3702.59	0
1079	Tacna	Peru	South America	2.28753e+07	-6825239	-2211848	South America	82382.1	0	0	0	21208.6	61173.4	0	0	0	0	0	0	0	0	7.09423	15.9058	0	0	0	0	0	0	0	0	2989.56	3845.99	0	0	0	0	0
1184	Usak	Turkey	Western Asia	1.09837e+07	2527136	4640591	Asia	75622.8	0	49.3281	75573.4	0	0	0	0	0	0	0	0	0.0235202	10.9765	0	0	0	0	0	0	0	0	2097.27	6885.03	0	0	0	0	0	0	0
758	Muara Bungo	Indonesia	South-Eastern Asia	9.93315e+06	10231900	-184500	Asia	70947.5	70947.5	0	0	0	0	0	0	0	0	0	10	0	0	0	0	0	0	0	0	0	7094.75	0	0	0	0	0	0	0	0	0
424	Hirosaki	Japan	Eastern Asia	2.5973e+07	11864231	4856423	Asia	89779.7	0	0	0	0	0	0	0	0	89779.7	0	0	0	0	0	0	0	0	0	26	0	0	0	0	0	0	0	0	0	3453.06	0
1254	Zamora	Mexico	Central America	1.79075e+07	-9865111	2452389	North America	68713.2	0	0	0	5008.93	63704.3	0	0	0	0	0	0	0	0	1.13413	16.8659	0	0	0	0	0	0	0	0	4416.55	3777.11	0	0	0	0	0
626	Lido di Ostia	Italy	Southern Europe	1.19907e+07	1025833	4982000	Europe	74895.4	0	0	0	0	0	148.453	74746.9	0	0	0	0	0	0	0	0	1.01383	10.9862	0	0	0	0	0	0	0	0	146.427	6803.73	0	0	0
808	Nobeoka	Japan	Eastern Asia	3.49011e+07	11868329	3944300	Asia	111442	0	0	0	111442	0	0	0	0	0	0	0	0	0	35	0	0	0	0	0	0	0	0	0	3184.06	0	0	0	0	0	0
1183	Uruapan	Mexico	Central America	4.17806e+07	-9864452	2382071	North America	145159	0	0	0	12233.2	132926	0	0	0	0	0	0	0	0	5.66234	36.3377	0	0	0	0	0	0	0	0	2160.45	3658.09	0	0	0	0	0
12	Acilia	Italy	Southern Europe	3.19755e+07	1032594	4986188	Europe	109065	0	0	0	0	0	0	63873.2	45192.2	0	0	0	0	0	0	0	0	17.4999	14.5001	0	0	0	0	0	0	0	0	3649.93	3116.68	0	0
950	Rome	Italy	Southern Europe	3.89712e+08	1044469	4999300	Europe	2.14746e+06	0	0	0	0	0	0	254519	1.36201e+06	523130	7797.84	0	0	0	0	0	0	62.0158	199.519	125.441	3.02416	0	0	0	0	0	0	4104.1	6826.49	4170.32	2578.51
154	Bengkulu	Indonesia	South-Eastern Asia	4.07279e+07	10237451	-471963	Asia	81321.6	0	0	0	0	5086.91	76234.6	0	0	0	0	0	0	0	0	10.3142	30.6858	0	0	0	0	0	0	0	0	493.197	2484.36	0	0	0	0
748	Miyakonojo	Japan	Eastern Asia	3.58918e+07	11882722	3846111	Asia	119978	0	0	0	0	0	0	62988.9	56989.3	0	0	0	0	0	0	0	0	17.5068	18.4932	0	0	0	0	0	0	0	0	3597.97	3081.64	0	0
1126	Terni	Italy	Southern Europe	2.89832e+07	1046879	5074259	Europe	87468.4	39390.5	48077.9	0	0	0	0	0	0	0	0	15.8287	13.1713	0	0	0	0	0	0	0	0	2488.55	3650.21	0	0	0	0	0	0	0	0
989	Sana'a	Yemen	Western Asia	1.21297e+08	4332238	1889451	Asia	466341	0	0	0	0	0	0	232535	233806	0	0	0	0	0	0	0	0	59.1645	62.8355	0	0	0	0	0	0	0	0	3930.31	3720.92	0	0
749	Miyazaki	Japan	Eastern Asia	4.58635e+07	11899283	3867087	Asia	128666	0	0	0	0	118858	9807.74	0	0	0	0	0	0	0	0	41.5577	4.44227	0	0	0	0	0	0	0	0	2860.07	2207.82	0	0	0	0
268	Curup	Indonesia	South-Eastern Asia	2.28472e+07	10263674	-430587	Asia	145552	0	0	0	0	0	0	0	0	136436	9115.77	0	0	0	0	0	0	0	0	20.1794	2.82064	0	0	0	0	0	0	0	0	6761.17	3231.81
600	Kushiro	Japan	Eastern Asia	6.69678e+07	11911724	5121187	Asia	180736	0	0	0	0	146234	34501.9	0	0	0	0	0	0	0	0	50.3173	16.6827	0	0	0	0	0	0	0	0	2906.24	2068.12	0	0	0	0
651	Lucena	Philippines	South-Eastern Asia	1.59052e+07	11965625	1717250	Asia	95385.3	0	0	0	0	0	0	0	67000.4	28384.9	0	0	0	0	0	0	0	0	10.1742	5.82584	0	0	0	0	0	0	0	0	6585.35	4872.24	0
70	Arba Minch	Ethiopia	Eastern Africa	1.29149e+07	3750654	744115	Africa	66587.9	66587.9	0	0	0	0	0	0	0	0	0	13	0	0	0	0	0	0	0	0	0	5122.15	0	0	0	0	0	0	0	0	0
369	Gimbichu	Ethiopia	Eastern Africa	3.97412e+06	3751000	920000	Africa	52678	0	0	0	52678	0	0	0	0	0	0	0	0	0	4	0	0	0	0	0	0	0	0	0	13169.5	0	0	0	0	0	0
25	Akita	Japan	Eastern Asia	7.99008e+07	11927475	4758638	Asia	220071	0	0	0	0	0	150099	69972	0	0	0	0	0	0	0	0	43.626	36.374	0	0	0	0	0	0	0	0	3440.58	1923.68	0	0	0
614	Latina	Italy	Southern Europe	1.39883e+07	1080143	4952143	Europe	55314.3	0	0	0	0	0	0	55314.3	0	0	0	0	0	0	0	0	0	14	0	0	0	0	0	0	0	0	0	3951.02	0	0	0
682	Manna	Indonesia	South-Eastern Asia	1.19206e+07	10294833	-550833	Asia	63449.4	0	0	0	0	10777.1	52672.3	0	0	0	0	0	0	0	0	3.27841	8.72159	0	0	0	0	0	0	0	0	3287.29	6039.3	0	0	0	0
650	Lubuklinggau	Indonesia	South-Eastern Asia	1.49002e+07	10298633	-406967	Asia	94004.2	0	0	0	0	0	4.29688	93999.9	0	0	0	0	0	0	0	0	0.0601114	14.9399	0	0	0	0	0	0	0	0	71.4819	6291.88	0	0	0
512	Kanazawa	Japan	Eastern Asia	1.54697e+08	11950500	4402906	Asia	476489	0	0	0	0	97924.8	378564	0	0	0	0	0	0	0	0	53.863	101.137	0	0	0	0	0	0	0	0	1818.03	3743.09	0	0	0	0
772	Naga	Philippines	South-Eastern Asia	1.68988e+07	12131206	1678794	Asia	56571.9	0	0	0	0	0	0	0	36510.9	20061	0	0	0	0	0	0	0	0	9.77108	7.22892	0	0	0	0	0	0	0	0	3736.63	2775.1	0
753	Morelia	Mexico	Central America	8.35648e+07	-9771750	2417655	North America	322127	0	0	0	155034	167093	0	0	0	0	0	0	0	0	38.2815	45.7185	0	0	0	0	0	0	0	0	4049.85	3654.81	0	0	0	0	0
451	Ibb	Yemen	Western Asia	1.78934e+07	4345500	1720000	Asia	118237	0	118237	0	0	0	0	0	0	0	0	0	18	0	0	0	0	0	0	0	0	0	6568.74	0	0	0	0	0	0	0	0
609	Lahat	Indonesia	South-Eastern Asia	1.49005e+07	10363833	-467900	Asia	125350	0	0	0	0	125350	0	0	0	0	0	0	0	0	0	15	0	0	0	0	0	0	0	0	0	8356.68	0	0	0	0	0
396	Hachinohe	Japan	Eastern Asia	6.09356e+07	11960713	4847615	Asia	119469	0	0	0	0	113652	5816.72	0	0	0	0	0	0	0	0.358271	57.1814	3.46036	0	0	0	0	0	0	0	0	1987.57	1680.96	0	0	0	0
459	Iloilo City	Philippines	South-Eastern Asia	6.7576e+07	12148882	1320544	Asia	319319	0	3014.69	219884	96420.2	0	0	0	0	0	0	0	1.97127	49.8197	16.209	0	0	0	0	0	0	0	1529.31	4413.59	5948.56	0	0	0	0	0	0
350	Fukui	Japan	Eastern Asia	4.4907e+07	11962744	4346700	Asia	120704	0	0	0	0	63574.9	57129.5	0	0	0	0	0	0	0	0	22.9673	22.0327	0	0	0	0	0	0	0	0	2768.06	2592.95	0	0	0	0
787	Naples	Italy	Southern Europe	5.44467e+08	1207839	4884990	Europe	2797797	0	0	0	0	0	0	0	62358.5	1.51919e+06	1.21625e+06	0	0	0	0	0	0	0	21.546	308.794	214.66	0	0	0	0	0	0	0	2894.2	4919.75	5665.93
1182	Uriangato	Mexico	Central America	1.49232e+07	-9753767	2469433	North America	55439.1	0	0	0	55439.1	0	0	0	0	0	0	0	0	0	15	0	0	0	0	0	0	0	0	0	3695.94	0	0	0	0	0	0
205	Caserta	Italy	Southern Europe	6.19423e+07	1203032	4908161	Europe	209901	0	0	0	0	0	0	54201.8	155700	0	0	0	0	0	0	0	0	17.5695	44.4305	0	0	0	0	0	0	0	0	3085.01	3504.33	0	0
1087	Takaoka	Japan	Eastern Asia	6.38776e+07	11970344	4424766	Asia	101611	0	0	0	0	77164.2	24446.5	0	0	0	0	0	0	0	0	46.4916	17.5084	0	0	0	0	0	0	0	0	1659.74	1396.27	0	0	0	0
942	Reno	United States of America	Northern America	4.59409e+07	-10215913	4736826	North America	56370.3	0	11796.1	44574.3	0	0	0	0	0	0	0	0	8.29942	37.7006	0	0	0	0	0	0	0	0	1421.32	1182.32	0	0	0	0	0	0	0
464	Irapuato	Mexico	Central America	4.57684e+07	-9748152	2535500	North America	198567	103158	0	0	0	0	0	0	0	0	0	17.7668	0	0	0	0	0	0	0	0	0	5806.21	0	0	0	0	0	0	0	0	0
72	Areka	Ethiopia	Eastern Africa	4.96753e+06	3761700	872900	Africa	83296.5	0	0	0	0	0	83296.5	0	0	0	0	0	0	0	0	0	5	0	0	0	0	0	0	0	0	0	16659.3	0	0	0	0
759	Muara Enim	Indonesia	South-Eastern Asia	8.94024e+06	10387389	-451944	Asia	64115.9	0	64115.9	0	0	0	0	0	0	0	0	0	9	0	0	0	0	0	0	0	0	0	7123.98	0	0	0	0	0	0	0	0
319	Echizen	Japan	Eastern Asia	2.79411e+07	11973821	4327964	Asia	84258.4	0	0	0	50213.1	34045.3	0	0	0	0	0	0	0	0	15.1902	12.8098	0	0	0	0	0	0	0	0	3305.64	2657.74	0	0	0	0	0
809	Nola	Italy	Southern Europe	2.09798e+07	1223262	4893500	Europe	53341	0	0	0	0	0	0	0	0	53341	0	0	0	0	0	0	0	0	0	21	0	0	0	0	0	0	0	0	0	2540.05	0
531	Keban Agung	Indonesia	South-Eastern Asia	1.29137e+07	10389423	-464423	Asia	83869.6	0	38.4219	83831.2	0	0	0	0	0	0	0	0	0.214814	12.7852	0	0	0	0	0	0	0	0	178.861	6556.9	0	0	0	0	0	0	0
1152	Toyama	Japan	Eastern Asia	4.99037e+07	11990780	4418180	Asia	104461	0	0	0	0	0	7	104454	0	0	0	0	0	0	0	0	0.0166779	49.9833	0	0	0	0	0	0	0	0	419.717	2089.78	0	0	0
364	Gela	Italy	Southern Europe	1.99631e+07	1241450	4458750	Europe	69567.5	13179	0	0	0	0	0	0	0	0	0	4.78562	0	0	0	0	0	0	0	0	0	2753.88	0	0	0	0	0	0	0	0	0
103	Avellino	Italy	Southern Europe	1.09894e+07	1246136	4891500	Europe	50636.7	0	0	0	0	0	0	50636.7	0.000492038	0	0	0	0	0	0	0	0	10.9973	0.00269561	0	0	0	0	0	0	0	0	4604.47	0.182533	0	0
296	Dhamar	Yemen	Western Asia	2.18712e+07	4361455	1790773	Asia	108618	0	0	0	0	0	0	26009.1	82608.9	0	0	0	0	0	0	0	0	6.10762	15.8924	0	0	0	0	0	0	0	0	4258.47	5198.02	0	0
108	Bacolod	Philippines	South-Eastern Asia	1.01364e+08	12191343	1315039	Asia	375857	0	0	0	0	0	25522.2	310232	40103	0	0	0	0	0	0	0	5.18145	84.4828	12.3358	0	0	0	0	0	0	0	4925.68	3672.13	3250.96	0	0
967	Salerno	Italy	Southern Europe	2.89704e+07	1246638	4864810	Europe	130375	0	0	0	0	0	0	129223	1152.36	0	0	0	0	0	0	0	0	28.2732	0.726811	0	0	0	0	0	0	0	0	4570.5	1585.5	0	0
142	Baturaja	Indonesia	South-Eastern Asia	1.19205e+07	10423833	-509250	Asia	97786.7	0	97786.7	0	0	0	0	0	0	0	0	0	12	0	0	0	0	0	0	0	0	0	8148.89	0	0	0	0	0	0	0	0
964	Salamanca	Mexico	Central America	2.78586e+07	-9737286	2522821	North America	100185	86807.1	0	0	0	0	0	0	0	0	0	20.4881	0	0	0	0	0	0	0	0	0	4236.95	0	0	0	0	0	0	0	0	0
141	Battipaglia	Italy	Southern Europe	1.29865e+07	1264577	4857500	Europe	54467.8	0	0	0	0	44250.8	10216.9	0	0	0	0	0	0	0	0	11.1734	1.82661	0	0	0	0	0	0	0	0	3960.38	5593.39	0	0	0	0
1027	Shinshicho	Ethiopia	Eastern Africa	3.97406e+06	3768000	890000	Africa	52146.6	0	0	0	0	0	0	52146.6	0	0	0	0	0	0	0	0	0	4	0	0	0	0	0	0	0	0	0	13036.6	0	0	0
1235	Yarim	Yemen	Western Asia	6.95882e+06	4362071	1760786	Asia	91555.8	0	0	0	0	0	91555.8	0	0	0	0	0	0	0	0	0	7	0	0	0	0	0	0	0	0	0	13079.4	0	0	0	0
619	Legazpi	Philippines	South-Eastern Asia	3.37958e+07	12199735	1620706	Asia	85686.3	0	0	0	0	0	0	0	0	85686.3	0	0	0	0	0	0	0	0	0	33.9975	0.00251747	0	0	0	0	0	0	0	0	2520.37	0
1158	Tsuruoka	Japan	Eastern Asia	2.09692e+07	12011310	4646976	Asia	106215	0	0	0	0	0	0	105864	351.262	0	0	0	0	0	0	0	0	20.4493	0.550685	0	0	0	0	0	0	0	0	5176.88	637.864	0	0
207	Catania	Italy	Southern Europe	1.01823e+08	1308098	4511873	Europe	461678	0	0	0	0	0	0	7542.34	442104	12031.3	0	0	0	0	0	0	0	3.57933	93.8346	4.58611	0	0	0	0	0	0	0	2107.2	4711.53	2623.43	0
754	Morioka	Japan	Eastern Asia	5.99255e+07	12017217	4757717	Asia	204708	0	0	0	0	0	0	0	95824.3	108883	0	0	0	0	0	0	0	0	22.6674	37.3326	0	0	0	0	0	0	0	0	4227.41	2916.58	0
13	Acireale	Italy	Southern Europe	1.39759e+07	1314214	4519714	Europe	55578.1	0	0	0	0	0	0	0	49941.9	5636.21	0	0	0	0	0	0	0	0	11.8858	2.11417	0	0	0	0	0	0	0	0	4201.8	2665.93	0
683	Manresa	Spain	Southern Europe	6.99456e+06	153071	4981500	Europe	50236.5	0	0	50236.5	0	0	0	0	0	0	0	0	0	7	0	0	0	0	0	0	0	0	0	7176.64	0	0	0	0	0	0	0
1074	Syracuse	Italy	Southern Europe	2.4954e+07	1330900	4461180	Europe	101989	0	4690.66	97298.2	0	0	0	0	0	0	0	0	2.62788	22.3721	0	0	0	0	0	0	0	0	1784.96	4349.08	0	0	0	0	0	0	0
805	Niigata	Japan	Eastern Asia	1.05825e+08	12028934	4554858	Asia	328215	0	0	111632	216583	0	0	0	0	0	0	0	0	41.8048	64.1952	0	0	0	0	0	0	0	0	2670.31	3373.82	0	0	0	0	0	0
966	Salem	United States of America	Northern America	5.69987e+07	-9940430	5335289	North America	81206.3	37329.5	0	0	0	0	0	0	0	0	0	21.5364	0	0	0	0	0	0	0	0	0	1733.32	0	0	0	0	0	0	0	0	0
724	Messina	Italy	Southern Europe	4.69252e+07	1341691	4586202	Europe	194652	0	0	0	0	194652	0	0	0	0	0	0	0	0	0	47	0	0	0	0	0	0	0	0	0	4141.53	0	0	0	0	0
906	Portland	United States of America	Northern America	3.40038e+08	-9848962	5396618	North America	474964	0	0	74670.8	106557	268745	24991.4	0	0	0	0	0	0	54.9715	88.3342	180.16	16.5343	0	0	0	0	0	0	1358.35	1206.3	1491.7	1511.49	0	0	0	0
940	Reggio Calabria	Italy	Southern Europe	3.49437e+07	1351957	4576929	Europe	126293	0	0	6566.46	119727	0	0	0	0	0	0	0	0	2.75892	32.2411	0	0	0	0	0	0	0	0	2380.08	3713.49	0	0	0	0	0	0
170	Boditi	Ethiopia	Eastern Africa	6.9545e+06	3776786	858929	Africa	70049.1	0	0	0	0	0	0	0	70049.1	0	0	0	0	0	0	0	0	0	7	0	0	0	0	0	0	0	0	0	10007	0	0
1080	Tacoma	United States of America	Northern America	1.31067e+08	-9643057	5579698	North America	129447	0	0	32284.3	97034.9	127.961	0	0	0	0	0	0	0	26.0051	104.87	0.124717	0	0	0	0	0	0	0	1241.46	925.286	1026	0	0	0	0	0
1127	Terrassa	Spain	Southern Europe	2.09829e+07	169119	4962976	Europe	162910	0	67063.2	95846.5	0	0	0	0	0	0	0	0	10.7549	10.2451	0	0	0	0	0	0	0	0	6235.62	9355.31	0	0	0	0	0	0	0
516	Karaj	Iran	Southern Asia	1.81611e+08	4488560	4310445	Asia	1.27112e+06	35927.8	0	0	0	0	0	0	0	0	0	13.2993	0	0	0	0	0	0	0	0	0	2701.47	0	0	0	0	0	0	0	0	0
495	Joetsu	Japan	Eastern Asia	3.69327e+07	12034284	4472311	Asia	97628	0	0	0	0	0	9789.79	82455.7	5382.46	0	0	0	0	0	0	0	6.04196	28.7503	2.20773	0	0	0	0	0	0	0	1620.3	2867.99	2438.01	0	0
316	Durame	Ethiopia	Eastern Africa	6.95462e+06	3779929	895214	Africa	52141.2	0	0	0	0	0	0	4285.41	47855.8	0	0	0	0	0	0	0	0	1.42459	5.57541	0	0	0	0	0	0	0	0	3008.16	8583.38	0	0
588	Kotabumi	Indonesia	South-Eastern Asia	1.88746e+07	10490026	-597921	Asia	152665	0	152665	0	0	0	0	0	0	0	0	0	19	0	0	0	0	0	0	0	0	0	8034.99	0	0	0	0	0	0	0	0
993	Sant Boi de Llobregat	Spain	Southern Europe	2.09817e+07	169500	4937119	Europe	140682	7559.79	0	0	0	0	0	0	0	0	0	1.95297	0	0	0	0	0	0	0	0	0	3870.92	0	0	0	0	0	0	0	0	0
910	Pringsewu	Indonesia	South-Eastern Asia	1.39079e+07	10492429	-661357	Asia	70060	0	13179.1	56880.9	0	0	0	0	0	0	0	0	2.67985	11.3202	0	0	0	0	0	0	0	0	4917.85	5024.75	0	0	0	0	0	0	0
211	Cebu City	Philippines	South-Eastern Asia	2.09677e+08	12295187	1272472	Asia	923786	210519	638857	74409.8	0	0	0	0	0	0	0	80.2662	101.462	29.2717	0	0	0	0	0	0	0	2622.76	6296.51	2542.04	0	0	0	0	0	0	0
136	Barcelona	Spain	Southern Europe	2.82761e+08	181581	4949535	Europe	2.46533e+06	1.12584e+06	1.00211e+06	301244	74.7599	0	0	0	0	0	0	100.39	112.185	62.6381	0.0415568	0	0	0	0	0	0	11214.7	8932.65	4809.28	1798.98	0	0	0	0	0	0
529	Kashiwazaki	Japan	Eastern Asia	1.7968e+07	12041611	4493222	Asia	72219	0	0	0	72219	0	0	0	0	0	0	0	0	0	18	0	0	0	0	0	0	0	0	0	4012.17	0	0	0	0	0	0
1011	Seattle	United States of America	Northern America	3.08185e+08	-9588838	5620870	North America	453618	209237	103532	15517.6	0	0	0	0	0	0	0	121.243	93.2052	11.1487	0	0	0	0	0	0	0	1725.77	1110.8	1391.87	0	0	0	0	0	0	0
385	Granollers	Spain	Southern Europe	1.29895e+07	191346	4968115	Europe	62146.1	0	0	0	62146.1	0	0	0	0	0	0	0	0	0	13	0	0	0	0	0	0	0	0	0	4780.47	0	0	0	0	0	0
1031	Shone	Ethiopia	Eastern Africa	6.95458e+06	3785643	881929	Africa	67490.3	0	0	0	0	0	0	0	0	67490.3	0	0	0	0	0	0	0	0	0	7	0	0	0	0	0	0	0	0	0	9641.47	0
454	Iguala	Mexico	Central America	1.29301e+07	-9659885	2253731	North America	50366.7	0	50366.7	0	0	0	0	0	0	0	0	0	13	0	0	0	0	0	0	0	0	0	3874.36	0	0	0	0	0	0	0	0
696	Mataró	Spain	Southern Europe	1.29893e+07	203885	4960577	Europe	93713.9	0	0	60537.9	33175.9	0	0	0	0	0	0	0	0	8.82982	4.17018	0	0	0	0	0	0	0	0	6856.08	7955.5	0	0	0	0	0	0
886	Pemanggilan	Indonesia	South-Eastern Asia	2.18552e+07	10515409	-654636	Asia	86392.2	0	0	52979.3	33412.9	0	0	0	0	0	0	0	0	14.1838	7.81621	0	0	0	0	0	0	0	0	3735.2	4274.83	0	0	0	0	0	0
990	Sanjo	Japan	Eastern Asia	2.39587e+07	12049833	4522417	Asia	86737	0	0	0	605.18	86131.8	0	0	0	0	0	0	0	0	0.385885	23.6141	0	0	0	0	0	0	0	0	1568.29	3647.47	0	0	0	0	0
1114	Tehran	Iran	Southern Asia	7.36408e+08	4522427	4300003	Asia	5764600	445158	322948	1.72113e+06	2.12636e+06	344482	0	0	0	0	0	76.595	106.85	226.736	208.052	49.6702	0	0	0	0	0	5811.84	3022.43	7590.88	10220.3	6935.4	0	0	0	0	0
121	Bandar Lampung	Indonesia	South-Eastern Asia	8.54345e+07	10521314	-669012	Asia	297504	0	0	0	55060.1	230518	11925.4	0	0	0	0	0	0	0	20.3569	58.9665	6.67657	0	0	0	0	0	0	0	2704.74	3909.3	1786.16	0	0	0	0
374	Girona	Spain	Southern Europe	1.19914e+07	234000	5009083	Europe	65408.8	0	0	0	0	0	0	65251.8	156.994	0	0	0	0	0	0	0	0	11.3163	0.683724	0	0	0	0	0	0	0	0	5766.19	229.617	0	0
777	Nagoya	Japan	Eastern Asia	2.07527e+09	12108446	4238075	Asia	6.64911e+06	2.00769e+06	1.58808e+06	378758	0	0	0	0	0	0	0	424.492	489.494	158.506	0	0	0	0	0	0	0	4729.63	3244.32	2389.54	0	0	0	0	0	0	0
725	Metro	Indonesia	South-Eastern Asia	2.68221e+07	10528796	-633019	Asia	87932.1	0	60114.4	27817.6	0	0	0	0	0	0	0	0	17.1541	9.84588	0	0	0	0	0	0	0	0	3504.37	2825.31	0	0	0	0	0	0	0
773	Nagano	Japan	Eastern Asia	3.59302e+07	12081417	4411889	Asia	99531.1	0	0	0	0	0	0	96.4219	99434.7	0	0	0	0	0	0	0	0	0.0345218	35.9655	0	0	0	0	0	0	0	0	2793.07	2764.73	0	0
1142	Toluca	Mexico	Central America	1.43245e+08	-9634194	2366674	North America	361994	0	0	0	0	0	0	8879.34	303285	49829.3	0	0	0	0	0	0	0	8.9783	115.61	19.4114	0	0	0	0	0	0	0	988.978	2623.34	2567.02	0
26	Aksaray	Turkey	Western Asia	1.69737e+07	2931382	4606794	Asia	64056.2	0	0	0	0	0	0	21347.3	42708.9	0	0	0	0	0	0	0	0	8.64094	8.35906	0	0	0	0	0	0	0	0	2470.48	5109.3	0	0
41	Alaba Kulito	Ethiopia	Eastern Africa	7.94817e+06	3798375	903000	Africa	106684	0	0	0	0	0	0	0	106684	0	0	0	0	0	0	0	0	0	8	0	0	0	0	0	0	0	0	0	13335.5	0	0
1049	Sohung	North Korea	Eastern Asia	3.99384e+06	10872500	4612000	Asia	55877.8	55877.8	0	0	0	0	0	0	0	0	0	4	0	0	0	0	0	0	0	0	0	13969.5	0	0	0	0	0	0	0	0	0
513	Kani	Japan	Eastern Asia	4.19072e+07	12096238	4272571	Asia	101514	0	0	0	101514	0	0	0	0	0	0	0	0	0	42	0	0	0	0	0	0	0	0	0	2417.01	0	0	0	0	0	0
130	Banjarmasin	Indonesia	South-Eastern Asia	1.09282e+07	10566045	-788500	Asia	70970.6	0	0	0	0	0	0	0	0	70970.6	0	0	0	0	0	0	0	0	0	11	0	0	0	0	0	0	0	0	0	6451.88	0
580	Koksan	North Korea	Eastern Asia	3.99418e+06	10875500	4653000	Asia	76259.1	0	0	76259.1	0	0	0	0	0	0	0	0	0	4	0	0	0	0	0	0	0	0	0	19064.8	0	0	0	0	0	0	0
700	Matsumoto	Japan	Eastern Asia	2.29532e+07	12101717	4363587	Asia	58457.1	0	0	0	0	0	0	58457.1	0	0	0	0	0	0	0	0	0	23	0	0	0	0	0	0	0	0	0	2541.61	0	0	0
927	Qarchak	Iran	Southern Asia	1.69621e+07	4561559	4261794	Asia	112499	0	83135.4	29363.3	0	0	0	0	0	0	0	0	9.68718	7.31282	0	0	0	0	0	0	0	0	8582.01	4015.32	0	0	0	0	0	0	0
180	Braja Asri	Indonesia	South-Eastern Asia	8.94072e+06	10567056	-639167	Asia	54957.1	0	0	0	54957.1	0	0	0	0	0	0	0	0	0	9	0	0	0	0	0	0	0	0	0	6106.35	0	0	0	0	0	0
1232	Yamagata	Japan	Eastern Asia	3.69416e+07	12104878	4592743	Asia	135756	0	0	0	0	0	0	0	0	135756	0	0	0	0	0	0	0	0	0	37	0	0	0	0	0	0	0	0	0	3669.09	0
980	San Juan del Río	Mexico	Central America	2.5868e+07	-9627154	2500500	North America	64736.1	0	564.812	64171.2	0	0	0	0	0	0	0	0	0.295057	25.7049	0	0	0	0	0	0	0	0	1914.25	2496.46	0	0	0	0	0	0	0
1173	Ueda	Japan	Eastern Asia	3.09381e+07	12110274	4382726	Asia	106509	0	0	0	0	0	0	0	106509	0	0	0	0	0	0	0	0	0	31	0	0	0	0	0	0	0	0	0	3435.78	0	0
765	Munchon	North Korea	Eastern Asia	1.49798e+07	10890300	4705300	Asia	91439.2	7524.11	0	0	0	0	0	0	0	0	0	2.62852	0	0	0	0	0	0	0	0	0	2862.49	0	0	0	0	0	0	0	0	0
1086	Tajimi	Japan	Eastern Asia	2.5942e+07	12111808	4262192	Asia	79932.4	0	0	27191.7	52740.7	0	0	0	0	0	0	0	0	9.45689	16.5431	0	0	0	0	0	0	0	0	2875.33	3188.07	0	0	0	0	0	0
265	Cuernavaca	Mexico	Central America	1.06433e+08	-9607930	2322500	North America	230776	0	0	0	0	0	0	20992.8	201297	8485.57	0	0	0	0	0	0	0	10.6778	92.8837	3.43845	0	0	0	0	0	0	0	1966.02	2167.2	2467.84	0
896	Pishva	Iran	Southern Asia	9.97764e+06	4569400	4258700	Asia	95584.8	0	20836.8	74748	0	0	0	0	0	0	0	0	3.20295	6.79705	0	0	0	0	0	0	0	0	6505.51	10997.1	0	0	0	0	0	0	0
240	Cilegon	Indonesia	South-Eastern Asia	4.47053e+07	10593367	-743189	Asia	143905	0	0	0	0	0	0	34130.5	109775	0	0	0	0	0	0	0	0	14.9247	30.0753	0	0	0	0	0	0	0	0	2286.85	3650	0	0
458	Iligan	Philippines	South-Eastern Asia	2.38459e+07	12373250	1016083	Asia	105039	0	0	0	105039	0	0	0	0	0	0	0	0	0	24	0	0	0	0	0	0	0	0	0	4376.63	0	0	0	0	0	0
728	Mexico City	Mexico	Central America	1.82344e+09	-9579248	2387606	North America	14418561	0	0	0	218125	1815385	2584530	4453436	4.24438e+06	1.10006e+06	2648.81	0	0	0	69.9119	324.872	315.048	482.437	454.638	184.611	1.48307	0	0	0	3120	5588.01	8203.62	9231.13	9335.74	5958.78	1786.04
52	Amol	Iran	Southern Asia	2.29545e+07	4583674	4391065	Asia	77287.6	0	0	0	68861.6	8426.08	0	0	0	0	0	0	0	0	20.4737	2.52627	0	0	0	0	0	0	0	0	3363.41	3335.39	0	0	0	0	0
1122	Tengchong	China	Eastern Asia	1.5931e+07	9287750	3056500	Asia	89777.6	0	0	0	0	0	0	0	89777.6	0	0	0	0	0	0	0	0	0	16	0	0	0	0	0	0	0	0	0	5611.1	0	0
861	Pandeglang	Indonesia	South-Eastern Asia	2.58301e+07	10593385	-780462	Asia	180237	0	0	0	0	0	0	0	0	478.656	179758	0	0	0	0	0	0	0	0	0.63213	25.3679	0	0	0	0	0	0	0	0	757.211	7086.06
895	Phyongsan	North Korea	Eastern Asia	1.09828e+07	10896136	4601955	Asia	73525.9	0	53192.2	20333.8	0	0	0	0	0	0	0	0	7.11222	3.88778	0	0	0	0	0	0	0	0	7478.99	5230.16	0	0	0	0	0	0	0
823	Okaya	Japan	Eastern Asia	2.49483e+07	12125420	4345500	Asia	83396	0	0	0	0	0	0	0	83326.8	69.1836	0	0	0	0	0	0	0	0	24.3111	0.688901	0	0	0	0	0	0	0	0	3427.52	100.426	0
1241	Yirga Cheffe	Ethiopia	Eastern Africa	3.97383e+06	3815000	761000	Africa	75299.6	0	0	75299.6	0	0	0	0	0	0	0	0	0	3.99952	0.000483288	0	0	0	0	0	0	0	0	18827.2	0	0	0	0	0	0	0
431	Hoi An	Vietnam	South-Eastern Asia	3.67894e+07	10593581	1958500	Asia	111077	429.223	0	0	0	0	0	0	0	0	0	0.434144	0	0	0	0	0	0	0	0	0	988.666	0	0	0	0	0	0	0	0	0
1078	Tacloban	Philippines	South-Eastern Asia	3.08081e+07	12379758	1384661	Asia	119218	0	0	0	69267	49951.3	0	0	0	0	0	0	0	0	19.4531	11.5469	0	0	0	0	0	0	0	0	3560.72	4325.95	0	0	0	0	0
482	Jakarta	Indonesia	South-Eastern Asia	2.89397e+09	10666541	-784419	Asia	16601548	0	0	243907	3927517	5.26976e+06	2495365	1.34645e+06	928641	2.15648e+06	233431	0	0	70.4123	547.687	792.26	476.181	363.815	225.227	387.757	49.6609	0	0	3463.98	7171.1	6651.56	5240.37	3700.91	4123.14	5561.42	4700.51
1073	Suwa	Japan	Eastern Asia	3.19334e+07	12137500	4339000	Asia	84983.4	0	0	0	0	0	0	0	10027.9	74955.5	0	0	0	0	0	0	0	0	5.93173	26.0683	0	0	0	0	0	0	0	0	1690.56	2875.35	0
686	Marawi	Philippines	South-Eastern Asia	8.84271e+07	12385410	987601	Asia	318323	0	0	0	0	0	107979	210344	0	0	0	0	0	0	0	0	31.3944	57.6056	0	0	0	0	0	0	0	0	3439.44	3651.44	0	0	0
555	Kibet	Ethiopia	Eastern Africa	3.97426e+06	3818000	991000	Africa	71736	0	0	0	0	0	0	0	0	0	71736	0	0	0	0	0	0	0	0	0	4	0	0	0	0	0	0	0	0	0	17934
939	Rangkasbitung	Indonesia	South-Eastern Asia	1.78824e+07	10608611	-785278	Asia	203772	0	0	0	0	0	0	0	203772	0	0	0	0	0	0	0	0	0	18	0	0	0	0	0	0	0	0	0	11320.7	0	0
1017	Sendai	Japan	Eastern Asia	2.45613e+08	12153220	4595435	Asia	939531	0	0	0	0	141296	540622	257613	0	0	0	0	0	0	0	55.253	130.075	60.6722	0	0	0	0	0	0	0	2557.25	4156.24	4245.99	0	0	0
261	Cotabato City	Philippines	South-Eastern Asia	2.18573e+07	12390955	891636	Asia	177937	0	0	0	0	9984.72	167953	0	0	0	0	0	0	0	0	2.34079	19.6592	0	0	0	0	0	0	0	0	4265.54	8543.2	0	0	0	0
1223	Wonsan	North Korea	Eastern Asia	3.69493e+07	10906608	4694743	Asia	306599	303095	3503.73	0	0	0	0	0	0	0	0	34.8739	2.12607	0	0	0	0	0	0	0	0	8691.16	1647.99	0	0	0	0	0	0	0	0
462	Inter-nishi	Japan	Eastern Asia	2.69528e+07	12147130	4507870	Asia	121525	0	0	0	0	0	0	0	2901.52	118624	0	0	0	0	0	0	0	0	1.82906	25.1709	0	0	0	0	0	0	0	0	1586.35	4712.72	0
195	Cagayan de Oro	Philippines	South-Eastern Asia	6.16029e+07	12407210	1047758	Asia	218253	0	47907.8	170345	0	0	0	0	0	0	0	0	10.784	51.216	0	0	0	0	0	0	0	0	4442.48	3326.02	0	0	0	0	0	0	0
530	Kayseri	Turkey	Western Asia	5.09253e+07	3050441	4648676	Asia	204359	0	0	0	0	0	0	38889.5	159365	6104.41	0	0	0	0	0	0	0	8.35864	40.6549	1.9865	0	0	0	0	0	0	0	4652.61	3919.95	3072.95	0
107	Babol	Iran	Southern Asia	2.19568e+07	4609000	4399636	Asia	87930.9	0	87930.8	0.0784346	0	0	0	0	0	0	0	0	22	4.92976e-05	0	0	0	0	0	0	0	0	3996.86	1591.04	0	0	0	0	0	0	0
854	Palabuhanratu	Indonesia	South-Eastern Asia	2.28506e+07	10630935	-864935	Asia	124306	0	0	0	0	0	0	48973.1	75332.6	0	0	0	0	0	0	0	0	15.0023	7.99769	0	0	0	0	0	0	0	0	3264.37	9419.29	0	0
456	Iida	Japan	Eastern Asia	2.89364e+07	12158293	4281534	Asia	92606.4	0	0	0	0	92606.4	0	0	0	0	0	0	0	0	0	29	0	0	0	0	0	0	0	0	0	3193.32	0	0	0	0	0
846	Paechon	North Korea	Eastern Asia	4.99182e+06	10919100	4563700	Asia	86915.2	86915.2	0	0	0	0	0	0	0	0	0	5	0	0	0	0	0	0	0	0	0	17383	0	0	0	0	0	0	0	0	0
300	Dilla	Ethiopia	Eastern Africa	1.09282e+07	3824591	792409	Africa	67865.6	0	0	0	0	67865.6	0	0	0	0	0	0	0	0	0	11	0	0	0	0	0	0	0	0	0	6169.6	0	0	0	0	0
586	Kosan	North Korea	Eastern Asia	5.99137e+06	10933167	4661333	Asia	72705.7	0	0	0	384.531	72321.2	0	0	0	0	0	0	0	0	0.869293	5.13071	0	0	0	0	0	0	0	0	442.349	14095.7	0	0	0	0	0
352	Fukushima	Japan	Eastern Asia	4.99157e+07	12165660	4539060	Asia	116859	0	0	0	0	0	0	0	51657.1	65201.7	0	0	0	0	0	0	0	0	24.6427	25.3573	0	0	0	0	0	0	0	0	2096.25	2571.32	0
926	Qaem Shahr	Iran	Southern Asia	2.39525e+07	4627708	4390542	Asia	76563	13969.6	62593.4	0	0	0	0	0	0	0	0	4.72291	19.2771	0	0	0	0	0	0	0	0	2957.84	3247.03	0	0	0	0	0	0	0	0
241	Cipanas	Indonesia	South-Eastern Asia	6.06028e+07	10683123	-832123	Asia	500782	0	0	0	0	0	0	0	0	131650	369132	0	0	0	0	0	0	0	0	25.855	35.145	0	0	0	0	0	0	0	0	5091.87	10503.1
506	Kaesong	North Korea	Eastern Asia	1.3977e+07	10942286	4561929	Asia	215026	0	3496.84	211529	0	0	0	0	0	0	0	0	1.2834	12.7166	0	0	0	0	0	0	0	0	2724.68	16634.1	0	0	0	0	0	0	0
470	Ishinomaki	Japan	Eastern Asia	2.596e+07	12168192	4612808	Asia	69442.6	0	0	0	9032.3	60410.3	0	0	0	0	0	0	0	0	4.20629	21.7937	0	0	0	0	0	0	0	0	2147.33	2771.92	0	0	0	0	0
135	Baoshan	China	Eastern Asia	3.38542e+07	9347265	3070676	Asia	138820	0	0	54406.4	84413.1	0	0	0	0	0	0	0	0	16.279	17.721	0	0	0	0	0	0	0	0	3342.13	4763.44	0	0	0	0	0	0
1088	Takasaki [Maebashi]	Japan	Eastern Asia	1.54689e+08	12183365	4378274	Asia	504077	0	0	0	0	0	0	0	366685	137392	0	0	0	0	0	0	0	0	100.649	54.3513	0	0	0	0	0	0	0	0	3643.22	2527.84	0
1128	Texcoco de Mora	Mexico	Central America	2.8849e+07	-9555052	2397224	North America	68783	0	0	0	0	13029.5	55753.5	0	0	0	0	0	0	0	0	4.92409	24.0759	0	0	0	0	0	0	0	0	2646.07	2315.74	0	0	0	0
233	Chucko	Ethiopia	Eastern Africa	4.9674e+06	3826300	813500	Africa	76629.2	0	0	0	0	0	76629.2	0	0	0	0	0	0	0	0	0	5	0	0	0	0	0	0	0	0	0	15325.8	0	0	0	0
465	Irba	Ethiopia	Eastern Africa	4.9675e+06	3828100	855700	Africa	65452.3	0	0	0	0	0	0	8426.96	57025.4	0	0	0	0	0	0	0	0	1.3247	3.6753	0	0	0	0	0	0	0	0	6361.4	15515.8	0	0
584	Koriyama	Japan	Eastern Asia	4.69167e+07	12195862	4495926	Asia	150823	0	0	0	0	0	0	49808.4	101015	0	0	0	0	0	0	0	0	16.9164	30.0836	0	0	0	0	0	0	0	0	2944.38	3357.81	0	0
122	Bandung	Indonesia	South-Eastern Asia	6.36833e+08	10738060	-856044	Asia	4483231	0	0	0	0	0	0	0	1.23278e+06	2.96813e+06	282313	0	0	0	0	0	0	0	264.416	302.013	74.5717	0	0	0	0	0	0	0	4662.3	9827.84	3785.8
469	Isesaki	Japan	Eastern Asia	1.03792e+08	12202971	4378240	Asia	278372	0	0	0	0	0	0	26425.8	206678	45268.3	0	0	0	0	0	0	0	11.7963	74.4492	17.7546	0	0	0	0	0	0	0	2240.18	2776.1	2549.67	0
466	Irgalem	Ethiopia	Eastern Africa	8.9414e+06	3833611	833611	Africa	117676	0	0	0	0	0	117676	0	0	0	0	0	0	0	0	0.161287	8.83871	0	0	0	0	0	0	0	0	0	13313.7	0	0	0	0
919	Purwakarta	Indonesia	South-Eastern Asia	4.86804e+07	10724990	-808643	Asia	230270	0	0	0	0	0	0	143639	86631.8	0	0	0	0	0	0	0	0	29.8803	19.1197	0	0	0	0	0	0	0	0	4807.13	4531.02	0	0
578	Kofu	Japan	Eastern Asia	1.45684e+08	12209808	4297596	Asia	409708	0	0	0	0	0	30631.2	379077	0	0	0	0	0	0	0	0	11.3644	134.636	0	0	0	0	0	0	0	0	2695.35	2815.58	0	0	0
191	Butuan	Philippines	South-Eastern Asia	2.28535e+07	12487891	1106196	Asia	85494.7	56490	0	0	0	0	0	0	0	0	0	12.3498	0	0	0	0	0	0	0	0	0	4574.16	0	0	0	0	0	0	0	0	0
45	Aleta Wendo	Ethiopia	Eastern Africa	3.97393e+06	3835000	816000	Africa	93381.6	0	0	0	0	93381.6	0	0	0	0	0	0	0	0	0	4	0	0	0	0	0	0	0	0	0	23345.4	0	0	0	0	0
877	Pasirukem	Indonesia	South-Eastern Asia	1.68888e+07	10731618	-764618	Asia	60698.8	0	0	0	60698.8	0	0	0	0	0	0	0	0	0	17	0	0	0	0	0	0	0	0	0	3570.52	0	0	0	0	0	0
434	Honjo	Japan	Eastern Asia	2.29533e+07	12205848	4364674	Asia	63177.6	0	0	0	0	0	0	63177.6	0	0	0	0	0	0	0	0	0	23	0	0	0	0	0	0	0	0	0	2746.85	0	0	0
841	Pachuca	Mexico	Central America	3.58157e+07	-9519806	2467139	North America	98487.1	6.98524	0	0	0	0	0	0	0	0	0	0.0122432	0	0	0	0	0	0	0	0	0	570.538	0	0	0	0	0	0	0	0	0
620	Leku	Ethiopia	Eastern Africa	4.96748e+06	3836100	849300	Africa	102822	0	0	0	0	0	0	102822	0	0	0	0	0	0	0	0	0	5	0	0	0	0	0	0	0	0	0	20564.5	0	0	0
835	Ota	Japan	Eastern Asia	1.0878e+08	12221344	4371619	Asia	275639	0	0	0	0	0	7723.38	266234	1681.52	0	0	0	0	0	0	0	3.99437	104.163	0.842681	0	0	0	0	0	0	0	1933.57	2555.94	1995.45	0	0
367	General Santos	Philippines	South-Eastern Asia	5.76205e+07	12499517	754483	Asia	198686	0	0	0	0	0	0	25464.6	173221	0	0	0	0	0	0	0	0	8.90908	49.0909	0	0	0	0	0	0	0	0	2858.28	3528.58	0	0
1129	Texmelucan	Mexico	Central America	1.89004e+07	-9520921	2367763	North America	69662.4	0	0	0	0	0	0	0	69662.4	0	0	0	0	0	0	0	0	0	19	0	0	0	0	0	0	0	0	0	3666.44	0	0
412	Hawassa	Ethiopia	Eastern Africa	2.58312e+07	3838385	871615	Africa	112539	0	0	0	0	0	0	0	10043.2	102496	0	0	0	0	0	0	0	0	3.49474	22.5053	0	0	0	0	0	0	0	0	2873.79	4554.29	0
1100	Tarogong	Indonesia	South-Eastern Asia	1.37105e+08	10762420	-889529	Asia	714158	0	0	0	0	0	0	0	0	361796	352362	0	0	0	0	0	0	0	0	58.6594	79.3406	0	0	0	0	0	0	0	0	6167.73	4441.14
348	Fukaya	Japan	Eastern Asia	2.99387e+07	12223633	4358100	Asia	91605.4	0	0	0	0	0	91584.9	20.4782	0	0	0	0	0	0	0	0	29.9731	0.0269467	0	0	0	0	0	0	0	0	3055.57	759.951	0	0	0
913	Puebla	Mexico	Central America	2.16849e+08	-9506459	2337477	North America	924593	0	0	0	0	0	0	344225	562758	17611	0	0	0	0	0	0	0	85.5872	126.098	6.31489	0	0	0	0	0	0	0	4021.92	4462.86	2788.81	0
16	Addis Ababa	Ethiopia	Eastern Africa	2.49401e+08	3855054	1110819	Africa	1.50507e+06	0	0	0	0	0	291268	1.09385e+06	119953	0	0	0	0	0	0	0	44.7097	158.647	47.6429	0	0	0	0	0	0	0	6514.65	6894.84	2517.76	0	0
929	Quang Ngãi	Vietnam	South-Eastern Asia	3.18147e+07	10666594	1860438	Asia	94639.7	0	0	0	0	14991.7	79648	0	0	0	0	0	0	0	0	7.21604	24.784	0	0	0	0	0	0	0	0	2077.55	3213.69	0	0	0	0
1058	Subang	Indonesia	South-Eastern Asia	1.78826e+07	10756111	-810500	Asia	112642	0	0	0	0	0	0	19984.2	92657.5	0	0	0	0	0	0	0	0	2.83761	15.1624	0	0	0	0	0	0	0	0	7042.62	6111.01	0	0
1186	Utsunomiya	Japan	Eastern Asia	8.78274e+07	12238409	4400227	Asia	236085	0	0	0	0	0	114671	121414	0	0	0	0	0	0	0	0	42.8169	45.1831	0	0	0	0	0	0	0	0	2678.17	2687.15	0	0	0
278	Davao City	Philippines	South-Eastern Asia	1.05312e+08	12529575	876377	Asia	430676	0	0	0	159675	233098	37902.5	0	0	0	0	0	0	0	37.9301	56.8579	11.2121	0	0	0	0	0	0	0	4209.73	4099.67	3380.51	0	0	0	0
417	Hegarsari	Indonesia	South-Eastern Asia	3.07988e+07	10762145	-875919	Asia	139965	0	0	0	0	0	0	0	0	14143.2	125822	0	0	0	0	0	0	0	0	5.63613	25.3639	0	0	0	0	0	0	0	0	2509.39	4960.66
592	Kumagaya	Japan	Eastern Asia	1.8961e+07	12233079	4354711	Asia	68437.2	0	0	0	0	8423.1	60014.1	0	0	0	0	0	0	0	0	2.44957	16.5504	0	0	0	0	0	0	0	0	3438.6	3626.14	0	0	0	0
991	Sano	Japan	Eastern Asia	1.89617e+07	12234974	4373447	Asia	59672.2	0	0	0	0	0	59672.2	0	0	0	0	0	0	0	0	0	19	0	0	0	0	0	0	0	0	0	3140.64	0	0	0	0
219	Cherkessk	Russia	Eastern Europe	2.39954e+07	3425625	5255625	Europe	97398.9	14029	0	0	0	0	0	0	0	0	0	5.49999	0	0	0	0	0	0	0	0	0	2550.73	0	0	0	0	0	0	0	0	0
19	Agre Salam	Ethiopia	Eastern Africa	2.98043e+06	3845500	801500	Africa	56974	0	0	0	56974	0	0	0	0	0	0	0	0	0	3	0	0	0	0	0	0	0	0	0	18991.3	0	0	0	0	0	0
1065	Sumedang	Indonesia	South-Eastern Asia	2.08634e+07	10768452	-845310	Asia	124017	0	0	0	0	0	0	0	0	61311	62706.1	0	0	0	0	0	0	0	0	10.5699	10.4301	0	0	0	0	0	0	0	0	5800.55	6012
1140	Tokyo	Japan	Eastern Asia	4.69884e+09	12303475	4299751	Asia	27342244	3235998	4571684	5521272	4.41767e+06	3.64408e+06	1794573	640224	230393	213870	21.6843	503.022	645.096	849.749	706.659	650.882	353.039	156.661	80.3693	69.5927	0.0723551	6433.11	7086.83	6497.54	6251.49	5598.69	5083.22	4086.67	2866.68	3073.17	299.693
1137	Tlaxcala	Mexico	Central America	3.28272e+07	-9496924	2371288	North America	79275.3	0	0	0	0	0	0	0	50372.3	28903	0	0	0	0	0	0	0	0	22.3563	10.6437	0	0	0	0	0	0	0	0	2253.16	2715.5	0
422	Higashimatsuyama	Japan	Eastern Asia	2.49482e+07	12245020	4342580	Asia	61362.8	0	0	0	39224.5	22138.3	0	0	0	0	0	0	0	0	12.6038	12.3962	0	0	0	0	0	0	0	0	3112.12	1785.89	0	0	0	0	0
1139	Tochigi	Japan	Eastern Asia	1.7964e+07	12241222	4381611	Asia	57983.1	0	0	0	0	0	57983.1	0	0	0	0	0	0	0	0	0	18	0	0	0	0	0	0	0	0	0	3221.28	0	0	0	0
65	Apizaco	Mexico	Central America	2.18851e+07	-9486545	2382591	North America	63985.1	0	0	0	0	0	0	0	63985.1	0	0	0	0	0	0	0	0	0	22	0	0	0	0	0	0	0	0	0	2908.41	0	0
1024	Shashamane	Ethiopia	Eastern Africa	2.68249e+07	3849537	889389	Africa	132029	0	0	0	0	0	0	0	132029	0	0	0	0	0	0	0	0	0	27	0	0	0	0	0	0	0	0	0	4889.96	0	0
1102	Tasikmalaya	Indonesia	South-Eastern Asia	3.81511e+08	10789995	-898307	Asia	1.49726e+06	0	0	0	0	0	0	257046	321259	834900	84053.2	0	0	0	0	0	0	25.6208	77.7288	245.625	35.0257	0	0	0	0	0	0	10032.7	4133.07	3399.09	2399.76
345	Fujieda	Japan	Eastern Asia	9.27827e+07	12258285	4206382	Asia	190152	0	3062.72	88108.8	98980.1	0	0	0	0	0	0	0	1.25993	43.6953	48.0448	0	0	0	0	0	0	0	2430.87	2016.44	2060.16	0	0	0	0	0	0
344	Fuji	Japan	Eastern Asia	8.87985e+07	12262006	4244433	Asia	246175	0	0	0	0	0	0	0	128829	117346	0	0	0	0	0	0	0	0	53.4807	35.5193	0	0	0	0	0	0	0	0	2408.89	3303.72	0
838	Oyama	Japan	Eastern Asia	3.39314e+07	12256265	4371235	Asia	104992	0	0	0	21415	83576.5	0	0	0	0	0	0	0	0	13.0796	20.9204	0	0	0	0	0	0	0	0	1637.28	3994.99	0	0	0	0	0
1029	Shizuoka	Japan	Eastern Asia	1.4267e+08	12260850	4222087	Asia	431038	0	0	0	0	213114	214386	3537.97	0	0	0	0	0	0	0	61.8729	77.4708	3.65628	0	0	0	0	0	0	0	3444.39	2767.31	967.642	0	0	0
88	Arsi Negelle	Ethiopia	Eastern Africa	8.94171e+06	3856167	908500	Africa	98284.1	0	0	0	0	0	0	0	0	98284.1	0	0	0	0	0	0	0	0	0	9	0	0	0	0	0	0	0	0	0	10920.5	0
505	Kadipaten	Indonesia	South-Eastern Asia	4.6694e+07	10799777	-833223	Asia	193582	0	0	0	0	0	0	0	193582	0	0	0	0	0	0	0	0	0	47	0	0	0	0	0	0	0	0	0	4118.77	0	0
666	Majalengka	Indonesia	South-Eastern Asia	1.49024e+07	10799967	-844700	Asia	73292.8	0	0	0	0	0	0	0	43469.9	29823	0	0	0	0	0	0	0	0	6.50067	8.49933	0	0	0	0	0	0	0	0	6686.99	3508.86	0
816	Numazu	Japan	Eastern Asia	1.19727e+08	12288375	4237225	Asia	421943	0	0	0	0	0	0	0	91816	324398	5728.87	0	0	0	0	0	0	0	37.0663	79.6282	3.30547	0	0	0	0	0	0	0	2477.07	4073.91	1733.15
564	Kislovodsk	Russia	Eastern Europe	2.19942e+07	3490773	5222364	Europe	105638	0	0	619.195	105019	0	0	0	0	0	0	0	0	0.711418	21.2886	0	0	0	0	0	0	0	0	870.368	4933.09	0	0	0	0	0	0
1115	Tehuacán	Mexico	Central America	3.28231e+07	-9447864	2267197	North America	106954	0	0	0	106954	0	0	0	0	0	0	0	0	0	33	0	0	0	0	0	0	0	0	0	3241.02	0	0	0	0	0	0
1238	Yessentuki	Russia	Eastern Europe	2.39943e+07	3498083	5235917	Europe	88909.1	0	88909.1	0	0	0	0	0	0	0	0	0	24	0	0	0	0	0	0	0	0	0	3704.55	0	0	0	0	0	0	0	0
461	Indramayu	Indonesia	South-Eastern Asia	5.46408e+07	10814609	-785045	Asia	193379	0	0	0	123545	69833.7	0	0	0	0	0	0	0	0	26.6727	28.3273	0	0	0	0	0	0	0	0	4631.91	2465.24	0	0	0	0	0
427	Hitachi	Japan	Eastern Asia	5.78865e+07	12303172	4402138	Asia	133036	0	133036	0	0	0	0	0	0	0	0	0	58	0	0	0	0	0	0	0	0	0	2293.73	0	0	0	0	0	0	0	0
923	Pyatigorsk	Russia	Eastern Europe	3.69912e+07	3514662	5235392	Europe	161860	134602	27257.5	0	0	0	0	0	0	0	0	27.9815	9.01854	0	0	0	0	0	0	0	0	4810.4	3022.39	0	0	0	0	0	0	0	0
746	Mito	Japan	Eastern Asia	4.59079e+07	12306065	4379457	Asia	119455	0	119165	289.967	0	0	0	0	0	0	0	0	45.8472	0.152816	0	0	0	0	0	0	0	0	2599.18	1897.49	0	0	0	0	0	0	0
486	Jatibarang	Indonesia	South-Eastern Asia	1.49021e+07	10812633	-799700	Asia	68162	0	0	0	0	162.648	67999.3	0	0	0	0	0	0	0	0	0.239426	14.7606	0	0	0	0	0	0	0	0	679.328	4606.82	0	0	0	0
1156	Tsukuba	Japan	Eastern Asia	2.49483e+07	12305180	4346180	Asia	63967.9	63967.9	0	0	0	0	0	0	0	0	0	25	0	0	0	0	0	0	0	0	0	2558.72	0	0	0	0	0	0	0	0	0
718	Meki	Ethiopia	Eastern Africa	6.95501e+06	3866500	1006500	Africa	61373.8	0	0	0	0	0	0	16787.4	44586.4	0	0	0	0	0	0	0	0	2.12713	4.87287	0	0	0	0	0	0	0	0	7892.02	9149.94	0	0
539	Kefole	Ethiopia	Eastern Africa	3.97403e+06	3869000	874000	Africa	69634.3	0	0	0	0	0	69634.3	0	0	0	0	0	0	0	0	0	4	0	0	0	0	0	0	0	0	0	17408.6	0	0	0	0
242	Cirebon	Indonesia	South-Eastern Asia	2.14593e+08	10829171	-829449	Asia	1.04859e+06	0	0	0	0	0	0	65375.4	880818	102401	0	0	0	0	0	0	0	14.8116	155.076	46.1126	0	0	0	0	0	0	0	4413.81	5679.91	2220.68	0
1155	Tsuchiura	Japan	Eastern Asia	4.69027e+07	12313436	4344564	Asia	122902	64556.9	0	0	0	0	0	0	0	0	0	21.1809	0	0	0	0	0	0	0	0	0	3047.89	0	0	0	0	0	0	0	0	0
830	Orizaba	Mexico	Central America	3.48144e+07	-9405900	2315071	North America	124020	0	0	0	0	0	0	414.125	123606	0	0	0	0	0	0	0	0	0.252862	34.7471	0	0	0	0	0	0	0	0	1637.75	3557.31	0	0
163	Bishoftu	Ethiopia	Eastern Africa	2.28531e+07	3876978	1080326	Africa	79881.5	0	0	0	0	0	0	0	0	0	79881.5	0	0	0	0	0	0	0	0	0	23	0	0	0	0	0	0	0	0	0	3473.11
596	Kuningan	Indonesia	South-Eastern Asia	1.13259e+08	10824079	-857167	Asia	372362	0	0	0	0	0	0	0	0	250371	121991	0	0	0	0	0	0	0	0	71.9941	42.0059	0	0	0	0	0	0	0	0	3477.66	2904.13
128	Banjar	Indonesia	South-Eastern Asia	1.49029e+07	10822300	-910567	Asia	96966.8	0	0	0	0	96966.8	0	0	0	0	0	0	0	0	0	15	0	0	0	0	0	0	0	0	0	6464.45	0	0	0	0	0
562	Kisarazu	Japan	Eastern Asia	5.18843e+07	12354808	4264327	Asia	140737	0	87882.9	52853.9	0	0	0	0	0	0	0	0	29.0496	22.9504	0	0	0	0	0	0	0	0	3025.27	2302.96	0	0	0	0	0	0	0
178	Bonsa Bota	Ethiopia	Eastern Africa	5.96086e+06	3876000	806000	Africa	98901.6	0	98901.6	0	0	0	0	0	0	0	0	0	6	0	0	0	0	0	0	0	0	0	16483.6	0	0	0	0	0	0	0	0
17	Adigrat	Ethiopia	Eastern Africa	8.94704e+06	3879167	1759056	Africa	52329.3	0	52329.3	0	0	0	0	0	0	0	0	0	9	0	0	0	0	0	0	0	0	0	5814.37	0	0	0	0	0	0	0	0
862	Pangandaran	Indonesia	South-Eastern Asia	7.94835e+06	10829250	-949750	Asia	52248.6	0	0	52248.6	0	0	0	0	0	0	0	0	0.0534819	7.94652	0	0	0	0	0	0	0	0	0	6575.03	0	0	0	0	0	0	0
132	Banjarsari	Indonesia	South-Eastern Asia	6.95472e+06	10827786	-924500	Asia	55048.2	0	0	0	55048.2	0	0	0	0	0	0	0	0	0	7	0	0	0	0	0	0	0	0	0	7864.03	0	0	0	0	0	0
1130	Teziutlán	Mexico	Central America	2.28812e+07	-9397674	2430891	North America	67048.9	0	0	0	0	0	0	0	1582.61	65466.3	0	0	0	0	0	0	0	0	0.963097	22.0369	0	0	0	0	0	0	0	0	1643.25	2970.76	0
115	Baksan	Russia	Eastern Europe	1.69945e+07	3566912	5196382	Europe	62941	62941	0	0	0	0	0	0	0	0	0	17	0	0	0	0	0	0	0	0	0	3702.41	0	0	0	0	0	0	0	0	0
523	Karangwareng	Indonesia	South-Eastern Asia	1.58959e+07	10839750	-845625	Asia	64345.4	0	0	0	0	0	0	0	64345.4	0	0	0	0	0	0	0	0	0	16	0	0	0	0	0	0	0	0	0	4021.59	0	0
667	Majenang	Indonesia	South-Eastern Asia	1.29158e+07	10845192	-901808	Asia	96189.7	0	0	0	0	25659.6	70530.1	0	0	0	0	0	0	0	0	7.13745	5.86255	0	0	0	0	0	0	0	0	3595.07	12030.6	0	0	0	0
260	Córdoba	Mexico	Central America	3.08357e+07	-9389661	2319435	North America	103133	0	0	0	0	0	10336.7	92795.8	0	0	0	0	0	0	0	0	3.7854	27.2146	0	0	0	0	0	0	0	0	2730.69	3409.78	0	0	0
1203	Waled	Indonesia	South-Eastern Asia	4.07334e+07	10847695	-851305	Asia	151674	0	0	0	0	0	0	151674	0	0	0	0	0	0	0	0	0	41	0	0	0	0	0	0	0	0	0	3699.36	0	0	0
783	Nalchik	Russia	Eastern Europe	3.79862e+07	3580947	5176132	Europe	197513	173486	0	0	0	0	0	0	0	0	0	30.743	0	0	0	0	0	0	0	0	0	5643.13	0	0	0	0	0	0	0	0	0
645	Losari	Indonesia	South-Eastern Asia	3.67593e+07	10857446	-845419	Asia	139122	0	0	0	0	1029.7	131652	6440.16	0	0	0	0	0	0	0	1.12845	33.7005	2.17109	0	0	0	0	0	0	0	912.495	3906.54	2966.32	0	0	0
907	Poza Rica	Mexico	Central America	3.5818e+07	-9378250	2518000	North America	119139	119139	0	0	0	0	0	0	0	0	0	36	0	0	0	0	0	0	0	0	0	3309.42	0	0	0	0	0	0	0	0	0
547	Kersana	Indonesia	South-Eastern Asia	3.47725e+07	10862614	-854900	Asia	158635	0	0	0	0	63360.4	95274.1	0	0	0	0	0	0	0	0	17.5402	17.4598	0	0	0	0	0	0	0	0	3612.29	5456.78	0	0	0	0
934	Quiha	Ethiopia	Eastern Africa	5.96417e+06	3895000	1660500	Africa	80091	0	80091	0	0	0	0	0	0	0	0	0	6	0	0	0	0	0	0	0	0	0	13348.5	0	0	0	0	0	0	0	0
238	Cilacap	Indonesia	South-Eastern Asia	8.54448e+07	10868791	-949686	Asia	747564	0	0	0	53.125	630609	116901	0	0	0	0	0	0	0	1.12032	57.9506	26.9291	0	0	0	0	0	0	0	47.4196	10881.8	4341.08	0	0	0	0
575	Kluwut	Indonesia	South-Eastern Asia	1.09285e+07	10868773	-848955	Asia	67918.5	0	0	0	0	56138.3	11780.2	0	0	0	0	0	0	0	0	8.86451	2.13549	0	0	0	0	0	0	0	0	6332.93	5516.4	0	0	0	0
1228	Xalapa	Mexico	Central America	5.07346e+07	-9363853	2398735	North America	212068	0	0	0	0	0	0	0	195970	16098.6	0	0	0	0	0	0	0	0	46.458	4.54205	0	0	0	0	0	0	0	0	4218.22	3544.36	0
1047	Siverek	Turkey	Western Asia	7.98648e+06	3405875	4536750	Asia	88945.3	0	0	0	0	0	88945.3	0	0	0	0	0	0	0	0	0	8	0	0	0	0	0	0	0	0	0	11118.2	0	0	0	0
93	Asella	Ethiopia	Eastern Africa	1.49034e+07	3898500	982233	Africa	66544.6	0	0	0	0	0	0	0	0	32505.2	34039.4	0	0	0	0	0	0	0	0	8.20174	6.79826	0	0	0	0	0	0	0	0	3963.2	5007.08
850	Paguyangan	Indonesia	South-Eastern Asia	2.28509e+07	10871022	-897630	Asia	83410.4	0	0	0	0	0	0	0	79892	3518.47	0	0	0	0	0	0	0	0	21.7537	1.24635	0	0	0	0	0	0	0	0	3672.58	2823.03	0
499	Jubang	Indonesia	South-Eastern Asia	2.48375e+07	10872180	-859140	Asia	75144.9	0	0	0	0	0	47028.9	28116	0	0	0	0	0	0	0	0	15.0832	9.91678	0	0	0	0	0	0	0	0	3117.96	2835.2	0	0	0
689	Martínez de la Torre	Mexico	Central America	1.19385e+07	-9357667	2461750	North America	56600.9	0	0	0	0	56600.9	0	0	0	0	0	0	0	0	0	12	0	0	0	0	0	0	0	0	0	4716.74	0	0	0	0	0
487	Jatilawang	Indonesia	South-Eastern Asia	1.58965e+07	10874500	-929500	Asia	66450.7	0	0	0	0	0	0	66450.7	0	0	0	0	0	0	0	0	0	16	0	0	0	0	0	0	0	0	0	4153.17	0	0	0
15	Adama	Ethiopia	Eastern Africa	3.4776e+07	3909586	1054929	Africa	128729	0	0	0	0	0	0	0	0	128701	27.837	0	0	0	0	0	0	0	0	34.98	0.0199757	0	0	0	0	0	0	0	0	3679.27	1393.54
1112	Tegalglagah	Indonesia	South-Eastern Asia	2.28505e+07	10874022	-853413	Asia	89025.1	0	0	0	0	0	89025.1	0	0	0	0	0	0	0	0	0	23	0	0	0	0	0	0	0	0	0	3870.66	0	0	0	0
1200	Viransehir	Turkey	Western Asia	6.98735e+06	3459357	4477929	Asia	69677.1	0	0	0	0	863.906	68813.2	0	0	0	0	0	0	0	0	0.690477	6.30952	0	0	0	0	0	0	0	0	1251.17	10906.2	0	0	0	0
1201	Vladikavkaz	Russia	Eastern Europe	5.79729e+07	3682707	5127759	Europe	304811	0	0	0	0	0	166013	138797	0	0	0	0	0	0	0	0	39.3656	18.6344	0	0	0	0	0	0	0	0	4217.22	7448.44	0	0	0
301	Diyarbakir	Turkey	Western Asia	2.59571e+07	3478269	4556231	Asia	215476	0	0	0	0	0	215476	0	0	0	0	0	0	0	0	0	26	0	0	0	0	0	0	0	0	0	8287.53	0	0	0	0
1111	Tegal	Indonesia	South-Eastern Asia	2.95069e+08	10886753	-855436	Asia	1.3353e+06	0	0	0	0	12266.2	441905	707279	173851	0	0	0	0	0	0	3.9994	94.9335	149.808	48.2592	0	0	0	0	0	0	3067.03	4654.89	4721.24	3602.44	0	0
303	Dodolla	Ethiopia	Eastern Africa	4.96751e+06	3909100	861700	Africa	66723.7	0	66723.7	0	0	0	0	0	0	0	0	0	5	0	0	0	0	0	0	0	0	0	13344.7	0	0	0	0	0	0	0	0
161	Binangun	Indonesia	South-Eastern Asia	9.9354e+06	10889500	-942000	Asia	61817.3	0	0	0	0	0	61817.3	0	0	0	0	0	0	0	0	0	10	0	0	0	0	0	0	0	0	0	6181.73	0	0	0	0
1193	Veracruz	Mexico	Central America	1.32301e+08	-9303711	2353432	North America	429794	1592.59	226512	201690	0	0	0	0	0	0	0	1.96296	63.3729	67.6642	0	0	0	0	0	0	0	811.321	3574.28	2980.75	0	0	0	0	0	0	0
1067	Sunzha	Russia	Eastern Europe	1.09955e+07	3703955	5156864	Europe	135381	0	134250	1130.3	0	0	0	0	0	0	0	0	10.6688	0.331193	0	0	0	0	0	0	0	0	12583.4	3412.82	0	0	0	0	0	0	0
92	Asassa	Ethiopia	Eastern Africa	5.96105e+06	3909667	877333	Africa	71049.8	0	64313.6	6736.22	0	0	0	0	0	0	0	0	4.51474	1.48526	0	0	0	0	0	0	0	0	14245.2	4535.39	0	0	0	0	0	0	0
921	Purwokerto	Indonesia	South-Eastern Asia	2.61297e+08	10896401	-913215	Asia	1.2567e+06	0	0	0	0	0	0	0	717658	526042	13000.4	0	0	0	0	0	0	0	124.25	135.099	3.65124	0	0	0	0	0	0	0	5775.92	3893.76	3560.55
0	Mandijara	Indonesia	South-Eastern Asia	2.98059e+07	10917500	-920200	Asia	136546	0	0	0	0	0	74757.6	61788.3	0	0	0	0	0	0	0	0	19	11	0	0	0	0	0	0	0	0	3934.61	5617.12	0	0	0
164	Bismil	Turkey	Western Asia	5.98999e+06	3519500	4548000	Asia	51909.3	0	0	51909.3	0	0	0	0	0	0	0	0	0	6	0	0	0	0	0	0	0	0	0	8651.54	0	0	0	0	0	0	0
149	Bekoji	Ethiopia	Eastern Africa	4.96767e+06	3913100	930300	Africa	51039.1	0	0	0	0	51039.1	0	0	0	0	0	0	0	0	0	5	0	0	0	0	0	0	0	0	0	10207.8	0	0	0	0	0
885	Pemalang	Indonesia	South-Eastern Asia	6.06034e+07	10914270	-852664	Asia	367658	0	0	0	0	0	338008	29650	0	0	0	0	0	0	0	0	51.7185	9.28146	0	0	0	0	0	0	0	0	6535.52	3194.54	0	0	0
378	Gombong	Indonesia	South-Eastern Asia	3.17932e+07	10916062	-939812	Asia	192201	0	0	0	0	186634	5566.65	0	0	0	0	0	0	0	0	29.9758	2.0242	0	0	0	0	0	0	0	0	6226.17	2750.05	0	0	0	0
1219	Woldia	Ethiopia	Eastern Africa	9.93865e+06	3915800	1458700	Africa	76359.3	0	0	64989.6	11369.7	0	0	0	0	0	0	0	0	7.73312	2.26688	0	0	0	0	0	0	0	0	8404.07	5015.55	0	0	0	0	0	0
577	Kobo	Ethiopia	Eastern Africa	8.94506e+06	3917167	1498500	Africa	95834.9	0	0	0	0	95834.9	0	0	0	0	0	0	0	0	0	9	0	0	0	0	0	0	0	0	0	10648.3	0	0	0	0	0
638	Loning	Indonesia	South-Eastern Asia	2.48374e+07	10921980	-851300	Asia	120811	0	0	0	0	44162.8	76648.1	0	0	0	0	0	0	0	0	5.90491	19.0951	0	0	0	0	0	0	0	0	7479	4014.02	0	0	0	0
768	Mus	Turkey	Western Asia	7.98828e+06	3564500	4648750	Asia	77646.7	0	0	0	77646.7	0	0	0	0	0	0	0	0	0	8	0	0	0	0	0	0	0	0	0	9705.84	0	0	0	0	0	0
722	Mersa	Ethiopia	Eastern Africa	7.9508e+06	3924000	1438500	Africa	69641.5	0	0	0	69641.5	0	0	0	0	0	0	0	0	0	8	0	0	0	0	0	0	0	0	0	8705.19	0	0	0	0	0	0
535	Kebumen	Indonesia	South-Eastern Asia	6.25932e+07	10930357	-947817	Asia	477607	0	0	0	0	475144	2463.08	0	0	0	0	0	0	0	0	61.8336	1.16642	0	0	0	0	0	0	0	0	7684.24	2111.65	0	0	0	0
884	Pekalongan	Indonesia	South-Eastern Asia	2.27511e+08	10937382	-853317	Asia	1105165	0	0	0	0	157803	478771	468591	0	0	0	0	0	0	0	36.4631	110.97	81.567	0	0	0	0	0	0	0	4327.76	4314.42	5744.86	0	0	0
295	Dessie	Ethiopia	Eastern Africa	1.9876e+07	3926050	1373950	Africa	126985	57760.7	0	0	0	0	0	0	0	0	0	11.2031	0	0	0	0	0	0	0	0	0	5155.78	0	0	0	0	0	0	0	0	0
131	Banjarnegara	Indonesia	South-Eastern Asia	3.57669e+07	10935472	-913361	Asia	213138	0	0	0	0	0	0	87187.6	125951	0	0	0	0	0	0	0	0	20.1717	15.8283	0	0	0	0	0	0	0	0	4322.26	7957.33	0	0
283	Debre Birhan	Ethiopia	Eastern Africa	1.29179e+07	3926731	1193962	Africa	60622.2	0	0	60622.2	0	0	0	0	0	0	0	0	0	13	0	0	0	0	0	0	0	0	0	4663.25	0	0	0	0	0	0	0
734	Minatitlán	Mexico	Central America	3.48102e+07	-9187757	2210929	North America	80818.1	77608.6	3209.48	0	0	0	0	0	0	0	0	33.5749	1.42509	0	0	0	0	0	0	0	0	2311.51	2252.13	0	0	0	0	0	0	0	0
414	Hayq	Ethiopia	Eastern Africa	5.9629e+06	3929000	1395000	Africa	53984	0	53984	0	0	0	0	0	0	0	0	0	6	0	0	0	0	0	0	0	0	0	8997.33	0	0	0	0	0	0	0	0
1023	Shangdu	China	Eastern Asia	8.99266e+06	9502389	4962833	Asia	91362.9	0	0	0	0	0	0	91362.9	0	0	0	0	0	0	0	0	0	9	0	0	0	0	0	0	0	0	0	10151.4	0	0	0
601	Kutoarjo	Indonesia	South-Eastern Asia	1.88774e+07	10952395	-954237	Asia	156733	0	0	0	0	0	155775	958.662	0	0	0	0	0	0	0	0	18.0827	0.917255	0	0	0	0	0	0	0	0	8614.54	1045.14	0	0	0
251	Coatzacoalcos	Mexico	Central America	5.56973e+07	-9172607	2227821	North America	142439	114907	27532.6	0	0	0	0	0	0	0	0	45.7757	10.2243	0	0	0	0	0	0	0	0	2510.21	2692.85	0	0	0	0	0	0	0	0
525	Kars	Turkey	Western Asia	9.98962e+06	3639600	4856300	Asia	54071.7	54071.7	0	0	0	0	0	0	0	0	0	10	0	0	0	0	0	0	0	0	0	5407.17	0	0	0	0	0	0	0	0	0
20	Agri	Turkey	Western Asia	7.99007e+06	3665500	4758000	Asia	57563.7	0	57561.6	2.08254	0	0	0	0	0	0	0	0	7.99867	0.00132805	0	0	0	0	0	0	0	0	7196.39	1568.12	0	0	0	0	0	0	0
582	Kombolcha	Ethiopia	Eastern Africa	1.98759e+07	3935550	1367050	Africa	139844	134580	0	0	0	0	0	0	0	0	0	17.6516	0	0	0	0	0	0	0	0	0	7624.25	0	0	0	0	0	0	0	0	0
881	Patnos	Turkey	Western Asia	9.98647e+06	3665000	4703700	Asia	56287.6	0	56287.6	0	0	0	0	0	0	0	0	0	10	0	0	0	0	0	0	0	0	0	5628.76	0	0	0	0	0	0	0	0
712	Mehal Meda	Ethiopia	Eastern Africa	3.97493e+06	3935000	1272000	Africa	57193.4	57193.4	0	0	0	0	0	0	0	0	0	4	0	0	0	0	0	0	0	0	0	14298.3	0	0	0	0	0	0	0	0	0
437	Huade	China	Eastern Asia	6.99484e+06	9509786	4999929	Asia	76383.3	0	76379.8	3.49736	0	0	0	0	0	0	0	0	6.39709	0.602909	0	0	0	0	0	0	0	0	11939.8	5.80081	0	0	0	0	0	0	0
1222	Wonosobo	Indonesia	South-Eastern Asia	6.45791e+07	10961915	-909069	Asia	316898	0	0	0	0	0	0	0	0	224531	92366.4	0	0	0	0	0	0	0	0	33.0331	31.9669	0	0	0	0	0	0	0	0	6797.16	2889.44
1170	Tuxtla Gutiérrez	Mexico	Central America	6.36424e+07	-9085297	2060734	North America	189071	0	0	27225.3	161845	0	0	0	0	0	0	0	0	9.98233	54.0177	0	0	0	0	0	0	0	0	2727.35	2996.15	0	0	0	0	0	0
376	Gobesa	Ethiopia	Eastern Africa	3.97416e+06	3936500	941000	Africa	51988.9	0	0	0	51988.9	0	0	0	0	0	0	0	0	0	4	0	0	0	0	0	0	0	0	0	12997.2	0	0	0	0	0	0
922	Purworejo	Indonesia	South-Eastern Asia	2.78193e+07	10961893	-953250	Asia	262202	0	0	0	0	0	867.062	261335	0	0	0	0	0	0	0	0	0.787964	27.212	0	0	0	0	0	0	0	0	1100.38	9603.66	0	0	0
948	Robe	Ethiopia	Eastern Africa	4.96777e+06	3948900	971300	Africa	53448.3	0	0	0	53448.3	0	0	0	0	0	0	0	0	0	5	0	0	0	0	0	0	0	0	0	10689.7	0	0	0	0	0	0
1206	Wates	Indonesia	South-Eastern Asia	2.18582e+07	10974955	-972727	Asia	146355	0	0	0	0	25968.7	120386	0	0	0	0	0	0	0	0	11.286	10.714	0	0	0	0	0	0	0	0	2300.97	11236.3	0	0	0	0
1098	Tapachula	Mexico	Central America	3.57907e+07	-9054222	1834333	North America	126000	0	0	0	0	0	0	81161.2	44839	0	0	0	0	0	0	0	0	22.2125	13.7875	0	0	0	0	0	0	0	0	3653.85	3252.16	0	0
870	Parakan	Indonesia	South-Eastern Asia	2.78185e+07	10976321	-899893	Asia	118747	0	0	0	0	0	0	0	0	51840.6	66906.5	0	0	0	0	0	0	0	0	8.62615	19.3738	0	0	0	0	0	0	0	0	6009.71	3453.45
1014	Semarang	Indonesia	South-Eastern Asia	4.6496e+08	11011521	-866953	Asia	2.13067e+06	0	0	0	0	742068	925485	338079	125035	0	0	0	0	0	0	165.476	186.392	74.574	41.5583	0	0	0	0	0	0	4484.46	4965.26	4533.47	3008.68	0	0
975	San Cristóbal de las Casas	Mexico	Central America	2.38658e+07	-9039833	2057750	North America	93888.6	93887.8	0.792941	0	0	0	0	0	0	0	0	23.9892	0.010805	0	0	0	0	0	0	0	0	3913.75	73.3863	0	0	0	0	0	0	0	0
1191	Van	Turkey	Western Asia	2.99545e+07	3733367	4622333	Asia	133986	17090.2	0	0	0	0	0	0	0	0	0	8.37151	0	0	0	0	0	0	0	0	0	2041.47	0	0	0	0	0	0	0	0	0
1179	Ulanqab	China	Eastern Asia	3.2969e+07	9514409	4904045	Asia	360374	0	0	0	353400	6973.72	0	0	0	0	0	0	0	0	31.2133	1.78669	0	0	0	0	0	0	0	0	11322.1	3903.15	0	0	0	0	0
1117	Temanggung	Indonesia	South-Eastern Asia	2.4838e+07	10986100	-903220	Asia	138233	0	0	0	0	0	0	0	0	138233	0	0	0	0	0	0	0	0	0	25	0	0	0	0	0	0	0	0	0	5529.32	0
1197	Villahermosa	Mexico	Central America	3.38155e+07	-9030676	2209559	North America	86669.5	0	0	86669.5	0	0	0	0	0	0	0	0	0	34	0	0	0	0	0	0	0	0	0	2549.1	0	0	0	0	0	0	0
663	Magelang	Indonesia	South-Eastern Asia	5.26572e+07	10988198	-924972	Asia	399364	0	0	0	0	0	0	0	191693	207671	0	0	0	0	0	0	0	0	26.7546	26.2454	0	0	0	0	0	0	0	0	7164.86	7912.67	0
304	Dogubayazit	Turkey	Western Asia	1.09859e+07	3758227	4739318	Asia	50097.4	0	0	0	0	0	0	0	50097.4	0	0	0	0	0	0	0	0	0	11	0	0	0	0	0	0	0	0	0	4554.31	0	0
766	Muntilan	Indonesia	South-Eastern Asia	4.47092e+07	10993078	-935544	Asia	174320	0	0	0	0	0	0	0	47760.5	126559	0	0	0	0	0	0	0	0	15.9975	29.0025	0	0	0	0	0	0	0	0	2985.49	4363.74	0
187	Busisi	Dem. Rep. Congo	Middle Africa	6.95322e+06	2907786	-210643	Africa	85470	0	0	0	0	0	0	85470	0	0	0	0	0	0	0	0	0	7	0	0	0	0	0	0	0	0	0	12210	0	0	0
1242	Yogyakarta	Indonesia	South-Eastern Asia	4.67961e+08	11008878	-959290	Asia	2.07113e+06	0	0	0	0	0	62473.9	773222	1.21945e+06	15974.6	0	0	0	0	0	0	21.6254	171.738	270.993	6.64418	0	0	0	0	0	0	2888.92	4502.35	4499.95	2404.31	0
50	Ambarawa	Indonesia	South-Eastern Asia	2.08639e+07	11011167	-896119	Asia	85922.6	0	0	0	0	0	0	0	85800.1	122.543	0	0	0	0	0	0	0	0	20.9154	0.084563	0	0	0	0	0	0	0	0	4102.24	1449.13	0
965	Salatiga	Indonesia	South-Eastern Asia	2.68251e+07	11018685	-906167	Asia	141517	0	0	0	0	0	0	0	0	141517	0	0	0	0	0	0	0	0	0	27	0	0	0	0	0	0	0	0	0	5241.39	0
963	Sake	Dem. Rep. Congo	Middle Africa	7.94652e+06	2911500	-194250	Africa	104463	0	0	0	0	0	0	0	104463	0	0	0	0	0	0	0	0	0	8	0	0	0	0	0	0	0	0	0	13057.9	0	0
1221	Wonosari	Indonesia	South-Eastern Asia	2.08648e+07	11017881	-983786	Asia	128807	0	0	0	0	80479.7	48327	0	0	0	0	0	0	0	0	12.0809	8.91908	0	0	0	0	0	0	0	0	6661.72	5418.38	0	0	0	0
377	Goma	Dem. Rep. Congo	Middle Africa	4.37059e+07	2927977	-205068	Africa	232863	0	0	0	0	0	0	0	1.39062	232861	0	0	0	0	0	0	0	0	0.76594	43.2341	0	0	0	0	0	0	0	0	1.81558	5386.07	0
1070	Surakarta	Indonesia	South-Eastern Asia	3.73569e+08	11042412	-933793	Asia	1461928	0	0	0	0	0	301899	750021	218218	191489	300.948	0	0	0	0	0	47.9636	197.062	75.501	55.2011	0.27235	0	0	0	0	0	6294.34	3806.02	2890.26	3468.94	1105
515	Kanyabayonga	Dem. Rep. Congo	Middle Africa	4.96654e+06	2923900	-86700	Africa	72200.6	0	0	72200.6	0	0	0	0	0	0	0	0	0	5	0	0	0	0	0	0	0	0	0	14440.1	0	0	0	0	0	0	0
291	Demak	Indonesia	South-Eastern Asia	9.93497e+06	11039400	-851400	Asia	79624.7	0	0	0	79624.7	0	0	0	0	0	0	0	0	0	10	0	0	0	0	0	0	0	0	0	7962.47	0	0	0	0	0	0
560	Kirumba	Dem. Rep. Congo	Middle Africa	7.94646e+06	2924625	-69375	Africa	65048.7	65048.7	0	0	0	0	0	0	0	0	0	8	0	0	0	0	0	0	0	0	0	8131.09	0	0	0	0	0	0	0	0	0
365	Gelemso	Ethiopia	Eastern Africa	4.96809e+06	4031300	1087900	Africa	58126.2	0	0	28426.1	29700.1	0	0	0	0	0	0	0	0	2.57821	2.42179	0	0	0	0	0	0	0	0	11025.5	12263.7	0	0	0	0	0	0
490	Jepara	Indonesia	South-Eastern Asia	1.02329e+08	11049403	-828083	Asia	517993	198029	302005	13884.8	0	0	0	0	0	0	0	34.9028	63.1857	3.73952	0	0	0	0	0	0	0	5673.71	4779.64	3712.99	0	0	0	0	0	0	0
1061	Sukoharjo	Indonesia	South-Eastern Asia	1.78838e+07	11047056	-948167	Asia	75323.2	0	0	0	0	0	16848.7	58474.5	0	0	0	0	0	0	0	0	6.19622	11.8038	0	0	0	0	0	0	0	0	2719.19	4953.88	0	0	0
189	Butembo	Dem. Rep. Congo	Middle Africa	2.78126e+07	2936500	15071	Africa	80234.1	0	0	78368.8	1865.34	0	0	0	0	0	0	0	0	26.7892	1.2108	0	0	0	0	0	0	0	0	2925.39	1540.58	0	0	0	0	0	0
150	Bekonang	Indonesia	South-Eastern Asia	2.38449e+07	11053458	-940000	Asia	74488.3	0	0	0	0	0	0	63094	11394.3	0	0	0	0	0	0	0	0	20.1477	3.85227	0	0	0	0	0	0	0	0	3131.57	2957.81	0	0
230	Chiro	Ethiopia	Eastern Africa	9.93637e+06	4064200	1120900	Africa	55369.4	0	55369.4	0	0	0	0	0	0	0	0	0	10	0	0	0	0	0	0	0	0	0	5536.94	0	0	0	0	0	0	0	0
1220	Wonogiri	Indonesia	South-Eastern Asia	1.88775e+07	11052974	-964447	Asia	154887	0	0	0	0	0	0	154887	0	0	0	0	0	0	0	0	0	19	0	0	0	0	0	0	0	0	0	8151.93	0	0	0
591	Kudus	Indonesia	South-Eastern Asia	1.31141e+08	11062152	-839591	Asia	530756	41485.5	486947	2322.9	0	0	0	0	0	0	0	14.9536	116.183	0.863776	0	0	0	0	0	0	0	2774.28	4191.22	2689.24	0	0	0	0	0	0	0
155	Beni	Dem. Rep. Congo	Middle Africa	3.27791e+07	2953136	60955	Africa	626694	0	456468	170226	0	0	0	0	0	0	0	0	24.6613	8.33872	0	0	0	0	0	0	0	0	18509.5	20413.9	0	0	0	0	0	0	0
423	Hirna	Ethiopia	Eastern Africa	4.96824e+06	4086300	1138100	Africa	51723.4	51723.4	0	0	0	0	0	0	0	0	0	5	0	0	0	0	0	0	0	0	0	10344.7	0	0	0	0	0	0	0	0	0
920	Purwodadi	Indonesia	South-Eastern Asia	2.68247e+07	11063426	-876648	Asia	179231	0	0	0	179231	0	0	0	0	0	0	0	0	0	27	0	0	0	0	0	0	0	0	0	6638.2	0	0	0	0	0	0
956	Rutshuru	Dem. Rep. Congo	Middle Africa	7.94649e+06	2949375	-142375	Africa	64537.2	0	0	0	0	0	0	64537.2	0	0	0	0	0	0	0	0	0	8	0	0	0	0	0	0	0	0	0	8067.15	0	0	0
842	Pacitan	Indonesia	South-Eastern Asia	2.68266e+07	11065130	-1012574	Asia	220773	0	0	0	220773	0	0	0	0	0	0	0	0	0	27	0	0	0	0	0	0	0	0	0	8176.78	0	0	0	0	0	0
1055	Sragen	Indonesia	South-Eastern Asia	2.48382e+07	11069340	-917500	Asia	172399	0	0	0	0	0	0	14732.9	157666	0	0	0	0	0	0	0	0	3.94734	21.0527	0	0	0	0	0	0	0	0	3732.36	7489.14	0	0
880	Pati	Indonesia	South-Eastern Asia	3.27851e+07	11080652	-833803	Asia	198780	177278	0	0	0	0	0	0	0	0	0	26.4068	0	0	0	0	0	0	0	0	0	6713.35	0	0	0	0	0	0	0	0	0
502	Juwana	Indonesia	South-Eastern Asia	2.28502e+07	11093109	-830457	Asia	114741	23431.5	0	0	0	0	0	0	0	0	0	11.2794	0	0	0	0	0	0	0	0	0	2077.37	0	0	0	0	0	0	0	0	0
185	Bunia	Dem. Rep. Congo	Middle Africa	3.07928e+07	3030661	193016	Africa	230596	230596	0	0	0	0	0	0	0	0	0	31	0	0	0	0	0	0	0	0	0	7438.58	0	0	0	0	0	0	0	0	0
903	Ponorogo	Indonesia	South-Eastern Asia	6.45811e+07	11104408	-972115	Asia	272519	0	0	0	0	0	0	224711	47808.4	0	0	0	0	0	0	0	0	53.9307	11.0693	0	0	0	0	0	0	0	0	4166.65	4319.02	0	0
661	Madiun	Indonesia	South-Eastern Asia	9.83604e+07	11114025	-940460	Asia	387830	0	0	0	0	0	0	275944	111886	0	0	0	0	0	0	0	0	67.6913	31.3087	0	0	0	0	0	0	0	0	4076.52	3573.63	0	0
498	Joresan	Indonesia	South-Eastern Asia	2.4839e+07	11108060	-980140	Asia	87439.2	0	0	0	0	0	0	86067.8	1371.42	0	0	0	0	0	0	0	0	24.3319	0.668123	0	0	0	0	0	0	0	0	3537.24	2052.65	0	0
800	Ngawi	Indonesia	South-Eastern Asia	1.49029e+07	11111433	-914900	Asia	94185.3	0	0	0	0	0	0	94185.3	0	0	0	0	0	0	0	0	0	15	0	0	0	0	0	0	0	0	0	6279.02	0	0	0
305	Dolopo	Indonesia	South-Eastern Asia	3.08e+07	11112855	-960371	Asia	83100.1	0	0	0	0	0	0	1591.74	81508.4	0	0	0	0	0	0	0	0	0.702489	30.2975	0	0	0	0	0	0	0	0	2265.86	2690.27	0	0
169	Blora	Indonesia	South-Eastern Asia	1.68895e+07	11115618	-860912	Asia	115244	0	0	115244	0	0	0	0	0	0	0	0	0	17	0	0	0	0	0	0	0	0	0	6779.05	0	0	0	0	0	0	0
1153	Trenggalek	Indonesia	South-Eastern Asia	2.48392e+07	11126500	-995860	Asia	108165	0	0	0	0	0	0	31256	76908.5	0	0	0	0	0	0	0	0	9.14074	15.8593	0	0	0	0	0	0	0	0	3419.41	4849.44	0	0
845	Padangan	Indonesia	South-Eastern Asia	2.58313e+07	11131654	-882692	Asia	131001	0	0	46622.5	84378.2	0	0	0	0	0	0	0	0	12.8222	13.1778	0	0	0	0	0	0	0	0	3636.09	6403.03	0	0	0	0	0	0
1166	Tulungagung	Indonesia	South-Eastern Asia	1.48042e+08	11151668	-998789	Asia	493375	0	0	0	0	0	47115.5	397803	48456.7	0	0	0	0	0	0	0	20.0299	112.134	16.8362	0	0	0	0	0	0	0	2352.26	3547.57	2878.12	0	0
799	Nganjuk	Indonesia	South-Eastern Asia	1.06309e+08	11153332	-940360	Asia	316308	0	0	0	0	0	0	49497.3	259050	7760.83	0	0	0	0	0	0	0	16.659	86.9517	3.38933	0	0	0	0	0	0	0	2971.21	2979.24	2289.78	0
173	Bojonegoro	Indonesia	South-Eastern Asia	3.37794e+07	11159735	-883618	Asia	213191	0	0	213191	0	0	0	0	0	0	0	0	0	34	0	0	0	0	0	0	0	0	0	6270.31	0	0	0	0	0	0	0
538	Kediri	Indonesia	South-Eastern Asia	1.03329e+08	11163298	-964952	Asia	419539	0	0	0	0	0	0	115460	304080	0	0	0	0	0	0	0	0	31.3245	72.6755	0	0	0	0	0	0	0	0	3685.92	4184.08	0	0
166	Blitar	Indonesia	South-Eastern Asia	1.30158e+08	11173531	-1002202	Asia	337456	0	0	0	0	0	0	6507.47	288109	42840	0	0	0	0	0	0	0	3.27936	112.751	14.9695	0	0	0	0	0	0	0	1984.37	2555.26	2861.83	0
874	Pare	Indonesia	South-Eastern Asia	5.96129e+07	11180600	-960117	Asia	189895	0	0	0	0	0	0	0	157641	32253.4	0	0	0	0	0	0	0	0	47.3141	12.6859	0	0	0	0	0	0	0	0	3331.81	2542.45	0
1159	Tuban	Indonesia	South-Eastern Asia	3.67594e+07	11179689	-851932	Asia	172477	48644	0	0	0	0	0	0	0	0	0	12.1156	0	0	0	0	0	0	0	0	0	4015	0	0	0	0	0	0	0	0	0
497	Jombang	Indonesia	South-Eastern Asia	7.84893e+07	11189361	-933449	Asia	334669	0	0	0	0	0	230839	103830	0	0	0	0	0	0	0	0	40.8335	38.1665	0	0	0	0	0	0	0	0	5653.17	2720.46	0	0	0
1069	Surabaya	Indonesia	South-Eastern Asia	8.79271e+08	11233667	-914910	Asia	4540102	0	0	0	0	0	1.15963e+06	1.53357e+06	912325	659096	275484	0	0	0	0	0	144.059	209.485	261.046	205.08	65.3298	0	0	0	0	0	8049.67	7320.66	3494.88	3213.85	4216.82
671	Malang	Indonesia	South-Eastern Asia	2.67267e+08	11221221	-980199	Asia	1.40079e+06	0	0	0	0	0	0	0	717312	638336	45145	0	0	0	0	0	0	0	127.703	133.007	8.28965	0	0	0	0	0	0	0	5617.04	4799.25	5445.95
610	Lamongan	Indonesia	South-Eastern Asia	1.58962e+07	11212375	-880062	Asia	75232.3	0	0	0	12905.3	62326.9	0	0	0	0	0	0	0	0	3.73253	12.2675	0	0	0	0	0	0	0	0	3457.53	5080.67	0	0	0	0	0
545	Kepanjen	Indonesia	South-Eastern Asia	2.18586e+07	11212136	-1003636	Asia	75498.2	0	0	0	0	0	0	0	75498.2	0	0	0	0	0	0	0	0	0	22	0	0	0	0	0	0	0	0	0	3431.74	0	0
379	Gondanglegi	Indonesia	South-Eastern Asia	4.07366e+07	11222159	-1009378	Asia	137190	0	0	0	0	0	0	25716.1	111474	0	0	0	0	0	0	0	0	6.23345	34.7665	0	0	0	0	0	0	0	0	4125.5	3206.35	0	0
909	Prigen	Indonesia	South-Eastern Asia	9.93544e+06	11225800	-949800	Asia	73008.5	0	0	0	0	0	0	0	0	0	73008.5	0	0	0	0	0	0	0	0	0	10	0	0	0	0	0	0	0	0	0	7300.85
386	Gresik	Indonesia	South-Eastern Asia	5.86172e+07	11234178	-884602	Asia	298785	0	0	0	0	152367	146418	0	0	0	0	0	0	0	0	31.0122	27.9878	0	0	0	0	0	0	0	0	4913.13	5231.51	0	0	0	0
123	Bangkalan	Indonesia	South-Eastern Asia	1.88766e+07	11247500	-867921	Asia	103740	0	0	1104.24	102636	0	0	0	0	0	0	0	0	0.961152	18.0388	0	0	0	0	0	0	0	0	1148.87	5689.71	0	0	0	0	0	0
879	Pasuruan	Indonesia	South-Eastern Asia	3.87481e+07	11252449	-946013	Asia	165838	0	0	0	0	0	0	108137	57701.1	0	0	0	0	0	0	0	0	20.5668	18.4332	0	0	0	0	0	0	0	0	5257.86	3130.27	0	0
518	Karang Kliwon	Indonesia	South-Eastern Asia	3.07999e+07	11261790	-951855	Asia	83865	0	0	0	0	0	0	0	83865	0	0	0	0	0	0	0	0	0.010227	30.9898	0	0	0	0	0	0	0	0	0	2706.22	0	0
1118	Tempeh	Indonesia	South-Eastern Asia	1.68908e+07	11271853	-1008147	Asia	59999.6	0	0	0	0	0	0	0	59999.6	0	0	0	0	0	0	0	0	0	17	0	0	0	0	0	0	0	0	0	3529.39	0	0
533	Kebonan	Indonesia	South-Eastern Asia	1.29165e+07	11276269	-1015654	Asia	53661.5	0	0	0	0	0	0	22002.3	31659.2	0	0	0	0	0	0	0	0	4.11168	8.88832	0	0	0	0	0	0	0	0	5351.18	3561.89	0	0
911	Probolinggo	Indonesia	South-Eastern Asia	7.2529e+07	11281678	-958952	Asia	242182	0	0	0	0	0	0	41627.1	200555	0	0	0	0	0	0	0	0	15.1633	57.8367	0	0	0	0	0	0	0	0	2745.25	3467.61	0	0
652	Lumajang	Indonesia	South-Eastern Asia	1.98714e+07	11276950	-1002900	Asia	160156	0	0	0	0	0	0	0	111479	48676.6	0	0	0	0	0	0	0	0	11.8155	8.18445	0	0	0	0	0	0	0	0	9434.96	5947.45	0
796	Nenjiang	China	Eastern Asia	1.80173e+07	9627556	5786278	Asia	154458	0	0	0	0	154458	0	0	0	0	0	0	0	0	0	18	0	0	0	0	0	0	0	0	0	8581.02	0	0	0	0	0
543	Kencong	Indonesia	South-Eastern Asia	1.49037e+07	11288433	-1021233	Asia	68172.4	0	0	0	0	0	0	65861.9	2310.53	0	0	0	0	0	0	0	0	14.0093	0.990749	0	0	0	0	0	0	0	0	4701.31	2332.1	0	0
970	Sampang	Indonesia	South-Eastern Asia	2.08638e+07	11294357	-889500	Asia	137503	0	137503	0	0	0	0	0	0	0	0	0	20.8587	0.141333	0	0	0	0	0	0	0	0	6592.11	0	0	0	0	0	0	0	0
118	Balung	Indonesia	South-Eastern Asia	1.02339e+08	11306393	-1029257	Asia	393780	0	0	0	0	0	265776	128004	0	0	0	0	0	0	0	0	67.1738	35.8262	0	0	0	0	0	0	0	0	3956.55	3572.92	0	0	0
590	Kraksaan	Indonesia	South-Eastern Asia	1.78839e+07	11304000	-958444	Asia	76734.6	0	0	0	0	0	0	0	76734.6	0	0	0	0	0	0	0	0	0	18	0	0	0	0	0	0	0	0	0	4263.03	0	0
587	Kotaanyar	Indonesia	South-Eastern Asia	1.68903e+07	11313618	-954500	Asia	54850.9	0	0	0	0	0	0	4.40625	54846.5	0	0	0	0	0	0	0	0	0.0545802	16.9454	0	0	0	0	0	0	0	0	80.7299	3236.65	0	0
489	Jember	Indonesia	South-Eastern Asia	7.65053e+07	11322175	-1010721	Asia	504483	0	0	0	0	0	0	16132.8	488350	0	0	0	0	0	0	0	0	7.93825	69.0617	0	0	0	0	0	0	0	0	2032.29	7071.21	0	0
858	Pamekasan	Indonesia	South-Eastern Asia	4.37145e+07	11319841	-882364	Asia	235239	156270	78969.7	0	0	0	0	0	0	0	0	33.2305	10.7695	0	0	0	0	0	0	0	0	4702.6	7332.7	0	0	0	0	0	0	0	0
176	Bondowoso	Indonesia	South-Eastern Asia	2.28518e+07	11340326	-978152	Asia	159101	0	0	0	0	0	0	18676.7	140424	0	0	0	0	0	0	0	0	4.88577	18.1142	0	0	0	0	0	0	0	0	3822.68	7752.15	0	0
1046	Situbondo	Indonesia	South-Eastern Asia	3.37805e+07	11361324	-951294	Asia	178378	0	0	0	0	0	175554	2824.27	0	0	0	0	0	0	0	0.0101445	32.9398	1.05007	0	0	0	0	0	0	0	0	5329.54	2689.6	0	0	0
511	Kalianget	Indonesia	South-Eastern Asia	1.98701e+07	11364500	-870150	Asia	56595.7	8371.64	0	0	0	0	0	0	0	0	0	4.29549	0	0	0	0	0	0	0	0	0	1948.94	0	0	0	0	0	0	0	0	0
323	Elizovskiy rayon	Russia	Eastern Europe	4.8089e+07	11565250	6189250	Europe	190866	0	0	0	0	0	0	0	190866	0	0	0	0	0	0	0	0	0.912862	47.0871	0	0	0	0	0	0	0	0	0	4053.47	0	0
368	Genteng	Indonesia	South-Eastern Asia	1.29166e+07	11365423	-1032269	Asia	72418.8	0	0	0	0	0	0	4316.26	68102.6	0	0	0	0	0	0	0	0	2.03004	10.97	0	0	0	0	0	0	0	0	2126.19	6208.1	0	0
764	Muncar	Indonesia	South-Eastern Asia	3.17949e+07	11381906	-1039125	Asia	116328	0	0	0	0	0	78772.4	37555.9	0	0	0	0	0	0	0	0	17.6135	14.3865	0	0	0	0	0	0	0	0	4472.27	2610.49	0	0	0
134	Banyuwangi	Indonesia	South-Eastern Asia	2.88137e+07	11389672	-1014190	Asia	205440	0	0	0	0	0	0	0	203402	2037.39	0	0	0	0	0	0	0	0	28.1723	0.827688	0	0	0	0	0	0	0	0	7219.94	2461.54	0
793	Negara	Indonesia	South-Eastern Asia	1.09295e+07	11412773	-1032136	Asia	83412.1	0	0	0	0	83412.1	0	0	0	0	0	0	0	0	0	11	0	0	0	0	0	0	0	0	0	7582.92	0	0	0	0	0
1045	Singaraja	Indonesia	South-Eastern Asia	3.27878e+07	11462500	-1002561	Asia	164797	0	0	0	0	0	0	0	33286.3	131510	0	0	0	0	0	0	0	0	9.7224	23.2776	0	0	0	0	0	0	0	0	3423.67	5649.65	0
293	Denpasar	Indonesia	South-Eastern Asia	1.97728e+08	11464595	-1068982	Asia	423579	0	0	0	0	17463.2	230658	97321.9	78136.1	0	0	0	0	0	0	13.1872	130.126	42.107	13.5799	0	0	0	0	0	0	1324.25	1772.57	2311.3	5753.79	0	0
153	Beng	Indonesia	South-Eastern Asia	1.68912e+07	11480618	-1054618	Asia	54285.6	0	0	0	0	0	0	11911.6	42373.9	0	0	0	0	0	0	0	0	2.81066	14.1893	0	0	0	0	0	0	0	0	4238.02	2986.32	0	0
1015	Semarapura	Indonesia	South-Eastern Asia	1.29168e+07	11487192	-1054808	Asia	56432.3	0	0	0	0	0	0	0	56432.3	0	0	0	0	0	0	0	0	0	13	0	0	0	0	0	0	0	0	0	4340.95	0	0
522	Karangasem	Indonesia	South-Eastern Asia	1.39103e+07	11507929	-1043143	Asia	59089.4	0	0	0	0	0	0	0	0	59089.4	0	0	0	0	0	0	0	0	0	14	0	0	0	0	0	0	0	0	0	4220.67	0
695	Mataram	Indonesia	South-Eastern Asia	1.14264e+08	11556204	-1060857	Asia	384451	0	0	0	0	0	371566	12885.4	0	0	0	0	0	0	0	0	106.787	8.21336	0	0	0	0	0	0	0	0	3479.52	1568.83	0	0	0
908	Praya	Indonesia	South-Eastern Asia	9.93611e+06	11570300	-1075100	Asia	99540.1	0	0	0	0	0	0	99540.1	0	0	0	0	0	0	0	0	0	10	0	0	0	0	0	0	0	0	0	9954.01	0	0	0
1013	Selong	Indonesia	South-Eastern Asia	4.47122e+07	11593967	-1065944	Asia	200406	0	0	0	0	0	0	1030.23	196976	2399.05	0	0	0	0	0	0	0	0.913345	43.3559	0.730792	0	0	0	0	0	0	0	1127.98	4543.25	3282.81	0
1063	Sumbawa Besar	Indonesia	South-Eastern Asia	1.78847e+07	11687667	-1048389	Asia	95821.8	0	0	16754.6	79067.1	0	0	0	0	0	0	0	0	9.34044	8.65956	0	0	0	0	0	0	0	0	1793.77	9130.61	0	0	0	0	0	0
306	Dompu	Indonesia	South-Eastern Asia	1.19232e+07	11789250	-1055000	Asia	67495.8	0	0	0	21465.2	46030.5	0	0	0	0	0	0	0	0	3.08526	8.91474	0	0	0	0	0	0	0	0	6957.35	5163.42	0	0	0	0	0
159	Bima	Indonesia	South-Eastern Asia	1.98719e+07	11820300	-1044650	Asia	78281.8	0	0	0	0	0	78281.8	0	0	0	0	0	0	0	0	0	20	0	0	0	0	0	0	0	0	0	3914.09	0	0	0	0
794	Nehe	China	Eastern Asia	1.5012e+07	9683300	5713367	Asia	117677	101750	0	0	0	0	0	0	0	0	0	10.5083	0	0	0	0	0	0	0	0	0	9682.82	0	0	0	0	0	0	0	0	0
955	Ruteng	Indonesia	South-Eastern Asia	1.09296e+07	11989045	-1063318	Asia	74682.9	0	0	0	0	0	0	0	0	0	74682.9	0	0	0	0	0	0	0	0	0.00661164	10.9934	0	0	0	0	0	0	0	0	0	6793.43
325	Ende	Indonesia	South-Eastern Asia	2.0866e+07	12103167	-1092167	Asia	124896	0	0	0	0	0	0	0	0	0	124896	0	0	0	0	0	0	0	0	0	21	0	0	0	0	0	0	0	0	0	5947.44
701	Maumere	Indonesia	South-Eastern Asia	1.78849e+07	12163167	-1064056	Asia	111850	0	0	0	0	0	0	665.969	111184	0	0	0	0	0	0	0	0	0.682486	17.3175	0	0	0	0	0	0	0	0	975.799	6420.3	0	0
510	Kalabahi	Indonesia	South-Eastern Asia	1.19229e+07	12401000	-1014750	Asia	53366.4	0	0	0	0	53366.4	0	0	0	0	0	0	0	0	0	12	0	0	0	0	0	0	0	0	0	4447.2	0	0	0	0	0
589	Kotamobagu	Indonesia	South-Eastern Asia	1.39063e+07	12457929	91143	Asia	61961.5	0	0	0	0	0	0	0	0	61961.5	0	0	0	0	0	0	0	0	0	14	0	0	0	0	0	0	0	0	0	4425.82	0
673	Manado	Indonesia	South-Eastern Asia	4.66858e+07	12510032	182734	Asia	242948	0	0	0	0	0	0	0	0	237853	5095.68	0	0	0	0	0	0	0	0	45.0107	1.98928	0	0	0	0	0	0	0	0	5284.36	2561.57
165	Bitung	Indonesia	South-Eastern Asia	2.58262e+07	12541654	178192	Asia	75188.5	0	0	0	0	0	0	0	0	12188.4	63000	0	0	0	0	0	0	0	0	6.16385	19.8361	0	0	0	0	0	0	0	0	1977.41	3176.02
1125	Ternate	Indonesia	South-Eastern Asia	2.68193e+07	12765463	98130	Asia	83450.5	0	0	0	0	0	0	0	0	0	83450.5	0	0	0	0	0	0	0	0	0	27	0	0	0	0	0	0	0	0	0	3090.76
550	Keshan	China	Eastern Asia	1.0007e+07	9815800	5665300	Asia	64277.8	0	23912.9	40364.9	0	0	0	0	0	0	0	0	5.51598	4.48402	0	0	0	0	0	0	0	0	4335.2	9001.96	0	0	0	0	0	0	0
148	Bei'an	China	Eastern Asia	2.10157e+07	9838786	5688500	Asia	125140	0	0	0	29415.4	95724.8	0	0	0	0	0	0	0	0	6.01749	14.9825	0	0	0	0	0	0	0	0	4888.31	6389.1	0	0	0	0	0
309	Dongfeng	China	Eastern Asia	8.995e+06	10389944	5086389	Asia	86489.7	225.039	86264.7	0	0	0	0	0	0	0	0	0.266259	8.73374	0	0	0	0	0	0	0	0	845.19	9877.17	0	0	0	0	0	0	0	0
865	Panshi	China	Eastern Asia	1.29936e+07	10405500	5115269	Asia	82876.9	0	0	82876.9	0	0	0	0	0	0	0	0	0	13	0	0	0	0	0	0	0	0	0	6375.15	0	0	0	0	0	0	0
713	Meihekou	China	Eastern Asia	2.29865e+07	10417500	5070326	Asia	193340	0	0	185837	7502.79	0	0	0	0	0	0	0	0	19.6917	3.30831	0	0	0	0	0	0	0	0	9437.33	2267.87	0	0	0	0	0	0
444	Huinan	China	Eastern Asia	9.99446e+06	10430800	5086800	Asia	124546	0	0	0	0	124546	0	0	0	0	0	0	0	0	0	10	0	0	0	0	0	0	0	0	0	12454.6	0	0	0	0	0
634	Liuhe	China	Eastern Asia	1.19922e+07	10448833	5042333	Asia	95903.9	0	0	0	94936.9	966.928	0	0	0	0	0	0	0	0	11.761	0.239036	0	0	0	0	0	0	0	0	8072.21	4045.11	0	0	0	0	0
438	Huadian	China	Eastern Asia	2.19893e+07	10458909	5118682	Asia	115772	0	0	115772	0	0	0	0	0	0	0	0	0	22	0	0	0	0	0	0	0	0	0	5262.35	0	0	0	0	0	0	0
760	Mudanjiang	China	Eastern Asia	9.79892e+07	10515449	5294633	Asia	694339	468.062	565356	128515	0	0	0	0	0	0	0	0.277941	71.1288	26.5933	0	0	0	0	0	0	0	1684.04	7948.34	4832.62	0	0	0	0	0	0	0
1146	Tonghua	China	Eastern Asia	6.99448e+06	10511500	4975786	Asia	63875.5	63875.5	0	0	0	0	0	0	0	0	0	7	0	0	0	0	0	0	0	0	0	9125.07	0	0	0	0	0	0	0	0	0
1146	Tonghua	China	Eastern Asia	3.39736e+07	10522206	4981676	Asia	320017	0	305939	14078	0	0	0	0	0	0	0	0	23.2298	10.7702	0	0	0	0	0	0	0	0	13170.1	1307.12	0	0	0	0	0	0	0
327	Erdaojiang	China	Eastern Asia	9.99236e+06	10525400	4987300	Asia	60037	0	0	60037	0	0	0	0	0	0	0	0	0	9.84515	0.154846	0	0	0	0	0	0	0	0	6098.12	0	0	0	0	0	0	0
806	Ning'an	China	Eastern Asia	1.29978e+07	10532192	5268269	Asia	78374.3	0	0	0	2689.99	75684.3	0	0	0	0	0	0	0	0	1.98063	11.0194	0	0	0	0	0	0	0	0	1358.15	6868.29	0	0	0	0	0
315	Dunhua	China	Eastern Asia	2.69893e+07	10539907	5161426	Asia	224583	224583	0	0	0	0	0	0	0	0	0	26.6494	0.350567	0	0	0	0	0	0	0	0	8427.31	0	0	0	0	0	0	0	0	0
111	Baishan	China	Eastern Asia	2.1984e+07	10540864	5005364	Asia	190734	0	0	0	0	0	190734	0	0	0	0	0	0	0	0	0	22	0	0	0	0	0	0	0	0	0	8669.75	0	0	0	0
491	Jiangyuan	China	Eastern Asia	1.79875e+07	10541556	5019444	Asia	74417.9	0	0	0	0	0	0	28910.2	45507.8	0	0	0	0	0	0	0	0	8.85233	9.14767	0	0	0	0	0	0	0	0	3265.82	4974.79	0	0
441	Huanglong	China	Eastern Asia	1.9897e+07	10567350	2441900	Asia	68114.9	0	0	68114.9	0	0	0	0	0	0	0	0	0	20	0	0	0	0	0	0	0	0	0	3405.75	0	0	0	0	0	0	0
631	Lingao County	China	Eastern Asia	9.94849e+06	10582000	2442500	Asia	76935.4	0	0	0	0	76935.4	0	0	0	0	0	0	0	0	0	10	0	0	0	0	0	0	0	0	0	7693.54	0	0	0	0	0
274	Danzhou City	China	Eastern Asia	8.95312e+06	10587278	2395056	Asia	55064.2	0	54910.3	153.949	0	0	0	0	0	0	0	0	8.66583	0.334169	0	0	0	0	0	0	0	0	6336.41	460.693	0	0	0	0	0	0	0
632	Linjiang	China	Eastern Asia	9.99244e+06	10594800	4991500	Asia	95766.4	0	0	0	95766.4	0	0	0	0	0	0	0	0	0	10	0	0	0	0	0	0	0	0	0	9576.64	0	0	0	0	0	0
1230	Xuwen	China	Eastern Asia	1.0944e+07	10611409	2493409	Asia	117032	0	0	0	0	0	117032	0	0	0	0	0	0	0	0	0	11	0	0	0	0	0	0	0	0	0	10639.3	0	0	0	0
218	Chengmai County	China	Eastern Asia	9.94823e+06	10620500	2421000	Asia	76274.2	0	0	0	0	0	0	49950.4	26323.8	0	0	0	0	0	0	0	0	6.4029	3.5971	0	0	0	0	0	0	0	0	7801.21	7318.07	0	0
1229	Xiuying District	China	Eastern Asia	1.18389e+08	10639097	2454937	Asia	555670	0	0	0	0	0	0	0	39391.2	447193	69086.1	0	0	0	0	0	0	0	16.2117	89.5581	13.2302	0	0	0	0	0	0	0	2429.8	4993.33	5221.84
1167	Tunchang County	China	Eastern Asia	8.95292e+06	10644167	2376833	Asia	59304.7	0	0	0	55398.1	3906.63	0	0	0	0	0	0	0	0	7.44734	1.55266	0	0	0	0	0	0	0	0	7438.64	2516.09	0	0	0	0	0
928	Qionghai	China	Eastern Asia	1.29318e+07	10684654	2362500	Asia	118176	0	0	118176	0	0	0	0	0	0	0	0	0	13	0	0	0	0	0	0	0	0	0	9090.44	0	0	0	0	0	0	0
639	Lori	Armenia	Western Asia	1.99802e+07	3751400	4879300	Asia	77333.9	0	0	0	0	0	25862.6	51471.3	0	0	0	0	0	0	0	0	10.1283	9.87172	0	0	0	0	0	0	0	0	2553.5	5214.01	0	0	0
11	Aceh Utara	Indonesia	South-Eastern Asia	1.88749e+07	9689079	648763	Asia	56521.4	0	0	0	0	56521.4	0	0	0	0	0	0	0	0	0	19	0	0	0	0	0	0	0	0	0	2974.81	0	0	0	0	0
0	Köln	Germany	Western Europe	2.60352e+07	518231	5963192	Europe	66607.2	0	8844.21	57763	0	0	0	0	0	0	0	0	3.42454	22.5755	0	0	0	0	0	0	0	0	2582.59	2558.66	0	0	0	0	0	0	0
1244	Yonezawa	Japan	Eastern Asia	1.79702e+07	12120833	4554667	Asia	77663.9	0	0	0	0	0	0	0	76171.2	1492.7	0	0	0	0	0	0	0	0	17.5662	0.433828	0	0	0	0	0	0	0	0	4336.24	3440.76	0
0	Ragusa	Italy	Southern Europe	9.98122e+06	1283700	4442200	Europe	51184.3	51184.3	0	0	0	0	0	0	0	0	0	10	0	0	0	0	0	0	0	0	0	5118.43	0	0	0	0	0	0	0	0	0
0	Shahriyar	Iran	Southern Asia	1.49676e+07	4499567	4297833	Asia	163730	59564.4	0	0	0	0	0	0	0	0	0	6.99593	0	0	0	0	0	0	0	0	0	8514.16	0	0	0	0	0	0	0	0	0
495	Joetsu	Japan	Eastern Asia	1.49725e+07	12039567	4464567	Asia	75028.8	0	0	0	0	0	0	72.4375	74956.4	0	0	0	0	0	0	0	0	0.0993222	14.9007	0	0	0	0	0	0	0	0	729.318	5030.4	0	0
0	T'ongch'on	North Korea	Eastern Asia	5.99151e+06	10964333	4672667	Asia	55814.4	0	55814.4	0	0	0	0	0	0	0	0	0	6	0	0	0	0	0	0	0	0	0	9302.4	0	0	0	0	0	0	0	0
0	Gurage	Ethiopia	Eastern Africa	3.97427e+06	3832250	995500	Africa	60087.5	0	0	0	0	0	0	0	0	60087.5	0	0	0	0	0	0	0	0	0	4	0	0	0	0	0	0	0	0	0	15021.9	0
0	Butig	Philippines	South-Eastern Asia	6.85552e+07	12389036	970601	Asia	243284	0	0	0	0	0	0	14660.1	188478	40146	0	0	0	0	0	0	0	6.02622	46.7112	16.2626	0	0	0	0	0	0	0	2432.72	4034.96	2468.61	0
0	Sakata	Japan	Eastern Asia	3.19544e+07	11991531	4667938	Asia	92233.6	0	0	0	0	0	0	2448.91	89784.7	0	0	0	0	0	0	0	0	3.86339	28.1366	0	0	0	0	0	0	0	0	633.875	3191.03	0	0
111	Baishan	China	Eastern Asia	8.9944e+06	10525500	5054500	Asia	59336.1	0	0	0	0	0	0	0	59336.1	0	0	0	0	0	0	0	0	0	9	0	0	0	0	0	0	0	0	0	6592.9	0	0
111	Baishan	China	Eastern Asia	9.99327e+06	10604800	5030900	Asia	60237.1	0	0	0	0	60237.1	0	0	0	0	0	0	0	0	0	10	0	0	0	0	0	0	0	0	0	6023.71	0	0	0	0	0
0	Maku	Iran	Southern Asia	1.79759e+07	3802056	4710056	Asia	126779	0	0	0	0	6842.52	119936	0	0	0	0	0	0	0	0	1.6675	16.3325	0	0	0	0	0	0	0	0	4103.47	7343.41	0	0	0	0
0	Kanoya	Japan	Eastern Asia	2.29292e+07	11890804	3805239	Asia	68411	0	0	0	0	0	0	9456.66	58954.3	0	0	0	0	0	0	0	0	5.1152	17.8848	0	0	0	0	0	0	0	0	1848.74	3296.34	0	0
0	Shahriyar	Iran	Southern Asia	2.59435e+07	4504577	4290962	Asia	108770	67880.1	0	0	0	0	0	0	0	0	0	15.3834	0	0	0	0	0	0	0	0	0	4412.56	0	0	0	0	0	0	0	0	0
0	Shahriyar	Iran	Southern Asia	1.59654e+07	4505625	4296812	Asia	90809.3	90809.3	0	0	0	0	0	0	0	0	0	16	0	0	0	0	0	0	0	0	0	5675.58	0	0	0	0	0	0	0	0	0
0	Caspian Sea	Iran	Southern Asia	1.99615e+07	4601150	4417350	Asia	66240	66160.5	0	0	0	0	0	0	0	0	0	19.5202	0	0	0	0	0	0	0	0	0	3389.33	0	0	0	0	0	0	0	0	0
0	Ulaan Chab	China	Eastern Asia	7.99203e+06	9544875	4876750	Asia	63283.7	36801.7	26482	0	0	0	0	0	0	0	0	4.02611	3.97389	0	0	0	0	0	0	0	0	9140.75	6664.01	0	0	0	0	0	0	0	0
0	Le Gosier	Guadeloupe	Western Europe	2.287e+07	-6014413	1996978	Europe	51714.4	0	0	0	0	0	0	0	51714.4	0	0	0	0	0	0	0	0	0	23	0	0	0	0	0	0	0	0	0	2248.45	0	0
0	Munai	Philippines	South-Eastern Asia	6.16004e+07	12367371	970371	Asia	155408	0	0	0	0	0	0	130961	24446.9	0	0	0	0	0	0	0	0	50.5503	11.4497	0	0	0	0	0	0	0	0	2590.71	2135.16	0	0
0	Parang	Philippines	South-Eastern Asia	1.8877e+07	12391237	908921	Asia	64798	0	0	0	0	0	0	60261.8	4536.2	0	0	0	0	0	0	0	0	16.1688	2.83122	0	0	0	0	0	0	0	0	3727.04	1602.21	0	0
0	Seiro	Japan	Eastern Asia	1.79704e+07	12049000	4558944	Asia	67962.5	0	0	0	37462.2	30500.3	0	0	0	0	0	0	0	0	8.79804	9.20196	0	0	0	0	0	0	0	0	4258.02	3314.55	0	0	0	0	0
0	Ulaan Chab	China	Eastern Asia	8.99243e+06	9482056	4950833	Asia	63071.9	0	0	0	0	0	0	0	0	63071.9	0	0	0	0	0	0	0	0	0	9	0	0	0	0	0	0	0	0	0	7007.99	0
0	Gori	Georgia	Western Asia	1.09921e+07	3676045	5010136	Asia	57368.7	0	0	0	25653.7	31715.1	0	0	0	0	0	0	0	0	4.92187	6.07813	0	0	0	0	0	0	0	0	5212.18	5217.9	0	0	0	0	0
0	Mihara	Japan	Eastern Asia	1.79561e+07	11839500	4153833	Asia	51943.7	51943.7	0	0	0	0	0	0	0	0	0	18	0	0	0	0	0	0	0	0	0	2885.76	0	0	0	0	0	0	0	0	0
261	Cotabato City	Philippines	South-Eastern Asia	1.29157e+07	12389269	885038	Asia	84213.4	0	0	0	0	84213.4	0	0	0	0	0	0	0	0	0	13	0	0	0	0	0	0	0	0	0	6477.95	0	0	0	0	0
1240	Yingjiang County	China	Eastern Asia	8.9607e+06	9249833	3018500	Asia	51436.9	0	49066.2	2370.7	0	0	0	0	0	0	0	0	7.67513	1.32487	0	0	0	0	0	0	0	0	6392.87	1789.39	0	0	0	0	0	0	0
0	Catanzaro	Italy	Southern Europe	1.39802e+07	1397857	4673214	Europe	54110.7	54110.7	0	0	0	0	0	0	0	0	0	14	0	0	0	0	0	0	0	0	0	3865.05	0	0	0	0	0	0	0	0	0
0	Fujioka	Japan	Eastern Asia	2.29534e+07	12196457	4367630	Asia	55831.3	0	0	0	0	0	0	53250.2	2581.08	0	0	0	0	0	0	0	0	21.6166	1.38335	0	0	0	0	0	0	0	0	2463.39	1865.81	0	0
0	Ulaan Chab	China	Eastern Asia	7.99225e+06	9480000	4889750	Asia	50944.4	1048.56	49895.9	0	0	0	0	0	0	0	0	1.85589	6.14411	0	0	0	0	0	0	0	0	564.989	8120.93	0	0	0	0	0	0	0	0
387	Groznenskiy rayon	Russia	Eastern Europe	1.79919e+07	3751833	5136222	Europe	85223.3	85223.3	0	0	0	0	0	0	0	0	0	18	0	0	0	0	0	0	0	0	0	4734.63	0	0	0	0	0	0	0	0	0
0	Chinchiná	Colombia	South America	4.96703e+06	-7559900	615700	South America	51985.6	0	0	0	0	0	0	51985.6	0	0	0	0	0	0	0	0	0	5	0	0	0	0	0	0	0	0	0	10397.1	0	0	0
0	Satsumasendai	Japan	Eastern Asia	2.09373e+07	11806548	3855595	Asia	66411.1	0	0	0	0	0	0	1465.09	64946	0	0	0	0	0	0	0	0	1.26729	19.7327	0	0	0	0	0	0	0	0	1156.09	3291.29	0	0
0	Balindong	Philippines	South-Eastern Asia	1.98712e+07	12377050	981050	Asia	61963.5	0	0	0	0	0	0	61963.5	0	0	0	0	0	0	0	0	0	20	0	0	0	0	0	0	0	0	0	3098.17	0	0	0
0	Komatsu	Japan	Eastern Asia	1.99601e+07	11952900	4381900	Asia	59960.1	0	0	0	0	0	10361.4	49598.7	0	0	0	0	0	0	0	0	3.55467	16.4453	0	0	0	0	0	0	0	0	2914.86	3015.97	0	0	0
1157	Tsuruga	Japan	Eastern Asia	1.99568e+07	11989700	4297200	Asia	66949.8	0	66949.8	0	0	0	0	0	0	0	0	0	20	0	0	0	0	0	0	0	0	0	3347.49	0	0	0	0	0	0	0	0
0	Takayama	Japan	Eastern Asia	1.29733e+07	12046962	4353962	Asia	55231.1	0	0	0	0	0	0	1664.32	53566.8	0	0	0	0	0	0	0	0	0.999975	12	0	0	0	0	0	0	0	0	1664.36	4463.89	0	0
0	Fujikawaguchiko	Japan	Eastern Asia	3.19298e+07	12244625	4280344	Asia	86665.3	0	0	0	0	0	0	0	8903.43	77761.9	0	0	0	0	0	0	0	0	3.57045	28.4295	0	0	0	0	0	0	0	0	2493.64	2735.25	0
0	Düren	Germany	Western Europe	1.40188e+07	487714	5957357	Europe	52123.3	0	0	52123.3	0	0	0	0	0	0	0	0	0	14	0	0	0	0	0	0	0	0	0	3723.09	0	0	0	0	0	0	0
0	Zestaponi	Georgia	Western Asia	1.29911e+07	3581962	5023500	Asia	54374.4	0	54374.4	0	0	0	0	0	0	0	0	0	13	0	0	0	0	0	0	0	0	0	4182.64	0	0	0	0	0	0	0	0
1002	Santa Rosa	United States of America	Northern America	3.79417e+07	-10568132	4614921	North America	55644.1	0	0	0	12086.8	43557.3	0	0	0	0	0	0	0	0	7.1475	30.8525	0	0	0	0	0	0	0	0	1691.05	1411.79	0	0	0	0	0
889	Perbaungan	Indonesia	South-Eastern Asia	7.94686e+06	9906500	441000	Asia	51453.9	0	0	0	51453.9	0	0	0	0	0	0	0	0	0	8	0	0	0	0	0	0	0	0	0	6431.73	0	0	0	0	0	0
1101	Tarutung	Indonesia	South-Eastern Asia	7.94658e+06	9915125	249750	Asia	53421	0	0	0	53421	0	0	0	0	0	0	0	0	0	8	0	0	0	0	0	0	0	0	0	6677.62	0	0	0	0	0	0
0	Hita	Japan	Eastern Asia	1.59573e+07	11739688	4029875	Asia	52938.8	0	0	0	0	0	14200.8	38738.1	0	0	0	0	0	0	0	0	6.31096	9.68904	0	0	0	0	0	0	0	0	2250.17	3998.13	0	0	0
698	Matsue	Japan	Eastern Asia	2.09541e+07	11751119	4283881	Asia	51166.6	0	0	44508.4	6658.26	0	0	0	0	0	0	0	0	13.3813	7.61866	0	0	0	0	0	0	0	0	3326.15	873.941	0	0	0	0	0	0
74	Arga Makmur	Indonesia	South-Eastern Asia	7.94683e+06	10230750	-424750	Asia	52727	0	0	0	0	0	52727	0	0	0	0	0	0	0	0	0	8	0	0	0	0	0	0	0	0	0	6590.87	0	0	0	0
597	Kure	Japan	Eastern Asia	1.29679e+07	11812423	4135346	Asia	52796	8529.83	0	0	0	0	0	0	0	0	0	3.32461	0	0	0	0	0	0	0	0	0	2565.66	0	0	0	0	0	0	0	0	0
0	Parang	Philippines	South-Eastern Asia	4.07343e+07	12392402	900549	Asia	108622	0	0	0	0	0	42023.6	66598.4	0	0	0	0	0	0	0	0	15.1303	25.8697	0	0	0	0	0	0	0	0	2777.45	2574.38	0	0	0
0	Lumba-Bayabao	Philippines	South-Eastern Asia	1.98711e+07	12396250	973800	Asia	63219.5	0	0	0	0	0	0	0	63219.5	0	0	0	0	0	0	0	0	0	20	0	0	0	0	0	0	0	0	0	3160.98	0	0
0	Datu Odin Sinsuat	Philippines	South-Eastern Asia	2.98051e+06	12401833	868167	Asia	59053.2	0	0	0	59053.2	0	0	0	0	0	0	0	0	0	3	0	0	0	0	0	0	0	0	0	19684.4	0	0	0	0	0	0
0	Loire	France	Western Europe	1.7004e+07	325088	5453029	Europe	52281	10852.9	41428.1	0	0	0	0	0	0	0	0	5.30278	11.6972	0	0	0	0	0	0	0	0	2046.64	3541.71	0	0	0	0	0	0	0	0
0	Hyuga	Japan	Eastern Asia	2.69228e+07	11878019	3926944	Asia	56581	0	0	56581	0	0	0	0	0	0	0	0	0	27	0	0	0	0	0	0	0	0	0	2095.59	0	0	0	0	0	0	0
0	Caltanissetta	Italy	Southern Europe	7.986e+06	1220375	4506625	Europe	50539.9	8.58203	50531.3	0	0	0	0	0	0	0	0	0.00735967	7.99264	0	0	0	0	0	0	0	0	1166.09	6322.23	0	0	0	0	0	0	0	0
0	Odate	Japan	Eastern Asia	1.29855e+07	11906731	4820423	Asia	50038.4	0	0	0	0	0	0	50038.4	0	0	0	0	0	0	0	0	0	13	0	0	0	0	0	0	0	0	0	3849.1	0	0	0
0	Yurihonjo	Japan	Eastern Asia	1.39816e+07	11958857	4721571	Asia	54216.2	0	0	0	0	0	0	54216.2	0	0	0	0	0	0	0	0	0	14	0	0	0	0	0	0	0	0	0	3872.59	0	0	0
0	Kitakami	Japan	Eastern Asia	2.09719e+07	12060452	4711500	Asia	66927.2	0	0	0	0	6996.82	59930.4	0	0	0	0	0	0	0	0	3.67531	17.3247	0	0	0	0	0	0	0	0	1903.73	3459.25	0	0	0	0
0	Oshu	Japan	Eastern Asia	1.5978e+07	12080812	4692625	Asia	57494.4	0	0	0	0	0	0	57494.4	0	0	0	0	0	0	0	0	0	16	0	0	0	0	0	0	0	0	0	3593.4	0	0	0
0	Ichinoseki	Japan	Eastern Asia	1.39801e+07	12102000	4669000	Asia	54250.8	0	0	0	0	0	0	29801.8	24448.9	0	0	0	0	0	0	0	0	6.42673	7.57327	0	0	0	0	0	0	0	0	4637.17	3228.32	0	0
0	Gotemba	Japan	Eastern Asia	1.49664e+07	12275033	4257500	Asia	53807	0	0	0	0	0	0	0	0	50069.2	3737.83	0	0	0	0	0	0	0	0	13.3065	1.69352	0	0	0	0	0	0	0	0	3762.77	2207.13
0	Karanganyar	Indonesia	South-Eastern Asia	9.93542e+06	11076600	-946500	Asia	50011.7	0	0	0	0	0	0	0	0	1931.55	48080.2	0	0	0	0	0	0	0	0	0.88483	9.11517	0	0	0	0	0	0	0	0	2182.96	5274.74

## Sheet: 1990
city_ID	Name	Country	Subregion	Area_km2	Lat	Lon	Continent	Ttl_Ppl	100to90	90to80	80to70	70to60	60to50	50to40	40to30	30to20	20to10	Pp_10km	Area100to90	Area90to80	Area80to70	Area70to60	Area60to50	Area50to40	Area40to30	Area30to20	Area20to10	Ar_10_2	Dens100to90	Dens90to80	Dens80to70	Dens70to60	Dens60to50	Dens50to40	Dens40to30	Dens30to20	Dens20to10	Dens10
869	Papeete	Fr. Polynesia	Polynesia	3.87861e+07	-14556449	-2157064	Oceania	71917.2	0	34733.7	37183.5	0	0	0	0	0	0	0	0	22.8138	16.1862	0	0	0	0	0	0	0	0	1522.49	2297.23	0	0	0	0	0	0	0
21	Ahuachapan	El Salvador	Central America	1.78934e+07	-8840056	1716111	North America	68683.2	0	0	0	0	0	0	0	0	66876	1807.26	0	0	0	0	0	0	0	0	17.002	0.997969	0	0	0	0	0	0	0	0	3933.41	1810.94
226	Chinandega	Nicaragua	Central America	9.93942e+06	-8601500	1556700	North America	97912.7	0	0	0	0	0	0	0	0	97912.7	0	0	0	0	0	0	0	0	0	10	0	0	0	0	0	0	0	0	0	9791.27	0
75	Arica	Chile	South America	2.28768e+07	-6819370	-2270065	South America	114586	114586	0	0	0	0	0	0	0	0	0	23	0	0	0	0	0	0	0	0	0	4982.01	0	0	0	0	0	0	0	0	0
341	Fort-de-France	Martinique	Western Europe	4.37427e+07	-5997364	1799614	Europe	131478	0	0	0	0	0	0	0	131477	0.96342	0	0	0	0	0	0	0	0	43.9848	0.0152241	0	0	0	0	0	0	0	0	2989.14	63.2825	0
354	Funchal	Portugal	Southern Europe	3.98876e+07	-1525800	3953000	Europe	102007	0	0	0	0	0	0	0	0	29570.4	72436.1	0	0	0	0	0	0	0	0	13.498	26.502	0	0	0	0	0	0	0	0	2190.73	2733.23
944	Reykjavik	Iceland	Northern Europe	4.81998e+07	-1301938	7262562	Europe	94498.3	0	0	0	0	0	0	0	82163.8	12334.6	0	0	0	0	0	0	0	0	42.6045	5.39547	0	0	0	0	0	0	0	0	1928.52	2286.1	0
3	Aachen	Germany	Western Europe	5.10681e+07	459696	5954578	Europe	191376	3474.23	187753	148.606	0	0	0	0	0	0	0	1.37912	49.5533	0.0675474	0	0	0	0	0	0	0	2519.18	3788.9	2200.03	0	0	0	0	0	0	0
656	Luxembourg	Luxembourg	Western Europe	2.20235e+07	468864	5832818	Europe	68119.5	0	55140.4	12979.1	0	0	0	0	0	0	0	0	13.9069	8.09314	0	0	0	0	0	0	0	0	3964.98	1603.72	0	0	0	0	0	0	0
628	Limbe	Cameroon	Middle Africa	1.58939e+07	921312	496375	Africa	73171.1	0	0	0	0	0	0	0	66575.3	6595.81	0	0	0	0	0	0	0	0	13.3722	2.62777	0	0	0	0	0	0	0	0	4978.62	2510.04	0
953	Rubavu	Rwanda	Eastern Africa	2.97995e+07	2932967	-207400	Africa	80991.8	0	0	0	0	0	0	0	2671.01	78320.8	0	0	0	0	0	0	0	0	1.62462	28.3754	0	0	0	0	0	0	0	0	1644.09	2760.17	0
395	Gyumri	Armenia	Western Asia	2.39762e+07	3696542	4877708	Asia	122540	0	0	0	0	0	110862	11678.1	0	0	0	0	0	0	0	0	20.1014	3.89857	0	0	0	0	0	0	0	0	5515.11	2995.47	0	0	0
780	Nakhchivan	Azerbaijan	Western Asia	1.89742e+07	3883921	4700395	Asia	82499.4	0	0	0	82499.4	0	0	0	0	0	0	0	0	0	19	0	0	0	0	0	0	0	0	0	4342.07	0	0	0	0	0	0
755	Moroni	Comoros	Eastern Africa	2.18648e+07	4279455	-1442727	Africa	66078.1	0	0	0	0	0	0	0	0	66078.1	0	0	0	0	0	0	0	0	0	22	0	0	0	0	0	0	0	0	0	3003.55	0
836	Otaru	Japan	Eastern Asia	3.29857e+07	11610288	5143106	Asia	117110	0	0	0	0	0	117110	0	0	0	0	0	0	0	0	0	33	0	0	0	0	0	0	0	0	0	3548.79	0	0	0	0
1053	Sonsonate	El Salvador	Central America	1.68989e+07	-8833029	1690676	North America	109695	0	0	0	0	0	0	0	0	109695	0	0	0	0	0	0	0	0	0	17	0	0	0	0	0	0	0	0	0	6452.62	0
622	León	Nicaragua	Central America	1.59028e+07	-8580375	1533312	North America	143022	0	0	0	0	0	0	0	36161.4	106860	0	0	0	0	0	0	0	0	3.91191	12.0881	0	0	0	0	0	0	0	0	9243.92	8840.14	0
721	Mendoza	Argentina	South America	1.47592e+08	-6189534	-3982236	South America	648665	8621.75	0	0	0	0	0	0	0	0	0	4.72175	0	0	0	0	0	0	0	0	0	1825.96	0	0	0	0	0	0	0	0	0
494	João Teves	Cabo Verde	Western Africa	1.39189e+07	-2314857	1853929	Africa	80546.3	0	73688.2	6858.07	0	0	0	0	0	0	0	0	10.5879	3.41207	0	0	0	0	0	0	0	0	6959.64	2009.94	0	0	0	0	0	0	0
182	Buea	Cameroon	Middle Africa	1.49006e+07	926967	513767	Africa	50578.5	0	0	0	0	0	0	0	0	38750.2	11828.3	0	0	0	0	0	0	0	0	10.6784	4.32161	0	0	0	0	0	0	0	0	3628.84	2737.01
1237	Yerevan	Armenia	Western Asia	1.90783e+08	3772961	4808652	Asia	1.26196e+06	0	0	0	0	0	977215	284747	0	0	0	0	0	0	0	0	157.064	33.9358	0	0	0	0	0	0	0	0	6221.75	8390.76	0	0	0
340	Fomboni	Comoros	Eastern Africa	1.29208e+07	4322500	-1514885	Africa	122582	0	0	115009	7572.29	0	0	0	0	0	0	0	0	9.79901	3.20099	0	0	0	0	0	0	0	0	11736.8	2365.61	0	0	0	0	0	0
1039	Sigli	Indonesia	South-Eastern Asia	2.18553e+07	9590545	664682	Asia	75853.2	0	0	0	75853.2	0	0	0	0	0	0	0	0	0	22	0	0	0	0	0	0	0	0	0	3447.87	0	0	0	0	0	0
1018	Seoul	South Korea	Eastern Asia	1.35462e+09	11019857	4506563	Asia	16928704	5.58228e+06	4.00103e+06	784112	98734.2	0	0	0	0	0	0	321.357	256.859	68.9267	15.7549	0	0	0	0	0	0	17371	15576.8	11376	6266.89	0	0	0	0	0	0
1007	Sapporo	Japan	Eastern Asia	3.10856e+08	11654587	5129352	Asia	1.90051e+06	0	0	0	0	86991.2	1.25234e+06	561174	0	0	0	0	0	0	0	28.0534	177.739	105.208	0	0	0	0	0	0	0	3100.92	7045.96	5333.96	0	0	0
1192	Vancouver	Canada	Northern America	5.15503e+08	-9448834	5792003	North America	1.19412e+06	0	82190.2	435476	605137	71313.5	0	0	0	0	0	0	34.3714	218.127	229.113	33.3887	0	0	0	0	0	0	2391.24	1996.43	2641.21	2135.86	0	0	0	0	0
214	Chalchuapa	El Salvador	Central America	1.09349e+07	-8823227	1722409	North America	58484.2	0	0	0	0	0	0	0	0	12164	46320.2	0	0	0	0	0	0	0	0	4.91726	6.08274	0	0	0	0	0	0	0	0	2473.73	7615.02
674	Managua	Nicaragua	Central America	1.47096e+08	-8526236	1495804	North America	786290	0	0	0	0	0	0	0	0	245976	540314	0	0	0	0	0	0	0	0	41.616	106.384	0	0	0	0	0	0	0	0	5910.61	5078.9
979	San José	Costa Rica	Central America	2.89167e+08	-8349143	1227404	North America	1.09649e+06	0	0	0	0	0	0	2075.38	674972	419447	0	0	0	0	0	0	0	0.762757	140.1	150.138	0	0	0	0	0	0	0	2720.88	4817.8	2793.75	0
463	Ipiales	Colombia	South America	1.09264e+07	-7780500	102136	South America	53645.9	0	0	0	0	0	0	0	53645.9	0	0	0	0	0	0	0	0	0	11	0	0	0	0	0	0	0	0	0	4876.9	0	0
997	Santa Cruz de Tenerife	Spain	Southern Europe	5.28056e+07	-1507557	3462160	Europe	282259	0	0	0	0	0	182819	99440.3	0	0	0	0	0	0	0	0	24.7011	28.2989	0	0	0	0	0	0	0	0	7401.25	3513.92	0	0	0
1107	Tbilisi	Georgia	Western Asia	1.36893e+08	3745726	4980361	Asia	1.09194e+06	905239	63471.2	0	0	0	0	0	0	0	0	100.633	10.4634	0	0	0	0	0	0	0	0	8995.46	6066.04	0	0	0	0	0	0	0	0
359	Ganja	Azerbaijan	Western Asia	4.59532e+07	3911826	4865870	Asia	311252	132807	178444	0	0	0	0	0	0	0	0	21.9965	24.0035	0	0	0	0	0	0	0	0	6037.66	7434.09	0	0	0	0	0	0	0	0
429	Hodeidah	Yemen	Western Asia	3.28077e+07	4216136	1822379	Asia	252892	1519.62	251372	0	0	0	0	0	0	0	0	0.333358	32.6666	0	0	0	0	0	0	0	0	4558.54	7695.07	0	0	0	0	0	0	0	0
302	Djibouti	Djibouti	Eastern Africa	4.67105e+07	4269032	1427543	Africa	349300	0	0	300900	48399.9	0	0	0	0	0	0	0	0	42.3518	4.64822	0	0	0	0	0	0	0	0	7104.78	10412.6	0	0	0	0	0	0
961	Saint-Denis	Réunion	Western Europe	2.985e+07	5331133	-2561933	Europe	117348	0	0	0	0	0	117348	0	0	0	0	0	0	0	0	0.18945	29.8106	0	0	0	0	0	0	0	0	0	3936.45	0	0	0	0
726	Meulaboh	Indonesia	South-Eastern Asia	1.49006e+07	9618300	512567	Asia	87273.1	0	87273.1	0	0	0	0	0	0	0	0	0	15	0	0	0	0	0	0	0	0	0	5818.21	0	0	0	0	0	0	0	0
436	Hsinchu	Taiwan	Eastern Asia	9.85696e+07	11420540	3031419	Asia	451761	0	0	249936	201825	0	0	0	0	0	0	0	0	45.2512	53.7488	0	0	0	0	0	0	0	0	5523.31	3754.97	0	0	0	0	0	0
524	Karatsu	Japan	Eastern Asia	2.69287e+07	11643315	4045130	Asia	67674.1	0	57862.6	9811.57	0	0	0	0	0	0	0	0	22.8062	4.19382	0	0	0	0	0	0	0	0	2537.14	2339.53	0	0	0	0	0	0	0
995	Santa Ana	El Salvador	Central America	2.98225e+07	-8810367	1722367	North America	193021	0	0	0	0	0	0	0	0	154181	38839.3	0	0	0	0	0	0	0	0	22.9775	7.02252	0	0	0	0	0	0	0	0	6710.11	5530.68
987	San Pedro Sula	Honduras	Central America	5.26956e+07	-8621670	1907877	North America	300800	0	0	0	133793	167007	0	0	0	0	0	0	0	0	23.4173	29.5827	0	0	0	0	0	0	0	0	5713.42	5645.44	0	0	0	0	0
335	Esteli	Nicaragua	Central America	1.19279e+07	-8515417	1613250	North America	76809.9	0	0	76809.9	0	0	0	0	0	0	0	0	0	12	0	0	0	0	0	0	0	0	0	6400.83	0	0	0	0	0	0	0
203	Cartago	Costa Rica	Central America	3.47793e+07	-8334014	1216671	North America	130034	0	0	0	0	0	0	0	0	130034	0	0	0	0	0	0	0	0	0	35	0	0	0	0	0	0	0	0	0	3715.26	0
878	Pasto	Colombia	South America	2.78127e+07	-7743750	149571	South America	228493	0	0	0	0	0	0	0	0	139721	88771.3	0	0	0	0	0	0	0	0	16.7671	11.2329	0	0	0	0	0	0	0	0	8333.06	7902.81
557	Kigali	Rwanda	Eastern Africa	5.46327e+07	3013336	-241882	Africa	172382	0	19279.2	153102	0	0	0	0	0	0	0	0	10.2359	44.7641	0	0	0	0	0	0	0	0	1883.48	3420.21	0	0	0	0	0	0	0
162	Bireuen	Indonesia	South-Eastern Asia	2.08617e+07	9667167	642786	Asia	114092	0	0	0	0	38237.3	75854.3	0	0	0	0	0	0	0	0	8.24641	12.7536	0	0	0	0	0	0	0	0	4636.84	5947.68	0	0	0	0
1150	Toufen	Taiwan	Eastern Asia	2.98689e+07	11418433	3015700	Asia	148390	2360.42	146029	0	0	0	0	0	0	0	0	1.58295	28.417	0	0	0	0	0	0	0	0	1491.15	5138.79	0	0	0	0	0	0	0	0
1009	Sasebo	Japan	Eastern Asia	3.78974e+07	11644737	4012737	Asia	127189	0	0	64699.8	62489.6	0	0	0	0	0	0	0	0	19.3213	18.6787	0	0	0	0	0	0	0	0	3348.62	3345.51	0	0	0	0	0	0
273	Dagupan [Lingayen]	Philippines	South-Eastern Asia	5.36933e+07	11763685	1972056	Asia	112911	41544.8	0	0	0	0	0	0	0	0	0	28.2	0	0	0	0	0	0	0	0	0	1473.22	0	0	0	0	0	0	0	0	0
931	Quetzaltenango	Guatemala	Central America	2.98254e+07	-8982800	1828233	North America	82429.9	0	0	0	0	0	0	0	0	416.539	82013.3	0	0	0	0	0	0	0	0	0.170146	29.8299	0	0	0	0	0	0	0	0	2448.13	2749.37
690	Masaya	Nicaragua	Central America	1.29204e+07	-8512192	1476577	North America	95024.9	0	0	0	0	0	0	0	0	1752.22	93272.6	0	0	0	0	0	0	0	0	0.920193	12.0798	0	0	0	0	0	0	0	0	1904.19	7721.37
629	Limón	Costa Rica	Central America	1.58993e+07	-8244000	1233000	North America	52160.4	0	21273.2	30887.2	0	0	0	0	0	0	0	0	8.78149	7.21851	0	0	0	0	0	0	0	0	2422.51	4278.88	0	0	0	0	0	0	0
612	Las Palmas de Gran Canaria	Spain	Southern Europe	4.08469e+07	-1431207	3421988	Europe	293553	0	0	0	0	0	0	0	70618.1	222935	0	0	0	0	0	0	0	0	12.6341	28.3659	0	0	0	0	0	0	0	0	5589.48	7859.25	0
594	Kumba	Cameroon	Middle Africa	2.38414e+07	944667	572667	Africa	145244	0	0	0	0	0	0	145240	4.40585	0	0	0	0	0	0	0	0	23.9172	0.0827957	0	0	0	0	0	0	0	0	6072.62	53.2135	0	0
563	Kisii	Kenya	Eastern Africa	1.88728e+07	3484868	-82816	Africa	60201	0	0	0	0	0	60201	0	0	0	0	0	0	0	0	0	19	0	0	0	0	0	0	0	0	0	3168.48	0	0	0	0
1090	Takengon	Indonesia	South-Eastern Asia	1.19207e+07	9686750	572167	Asia	71631.6	0	0	0	0	0	0	0	0	71631.6	0	0	0	0	0	0	0	0	0	12	0	0	0	0	0	0	0	0	0	5969.3	0
729	Miaoli	Taiwan	Eastern Asia	1.69253e+07	11419441	3001147	Asia	85772.8	32045.2	0	0	0	0	0	0	0	0	0	6.6581	0	0	0	0	0	0	0	0	0	4812.96	0	0	0	0	0	0	0	0	0
91	Asahikawa	Japan	Eastern Asia	8.29753e+07	11651620	5207271	Asia	306259	0	0	0	0	0	150513	155746	0	0	0	0	0	0	0	0	44.2293	38.7707	0	0	0	0	0	0	0	0	3403.02	4017.09	0	0	0
704	Mazatenango	Guatemala	Central America	9.94144e+06	-8988500	1789600	North America	50784	0	0	0	0	0	0	0	50784	0	0	0	0	0	0	0	0	0	10	0	0	0	0	0	0	0	0	0	5078.4	0	0
312	Douala	Cameroon	Middle Africa	1.71853e+08	973731	501118	Africa	906673	0	0	115915	675836	114923	0	0	0	0	0	0	0	27.1373	109.417	36.4458	0	0	0	0	0	0	0	4271.41	6176.7	3153.26	0	0	0	0	0
99	Athens	Greece	Southern Europe	3.98347e+08	2052292	4563898	Europe	3277964	0	0	0	634160	1.70145e+06	942357	0	0	0	0	0	0	0	132.8	141.299	124.901	0	0	0	0	0	0	0	4775.31	12041.4	7544.83	0	0	0	0
624	Lhokseumawe	Indonesia	South-Eastern Asia	2.08617e+07	9710738	640690	Asia	65269.5	0	0	0	0	65269.5	0	0	0	0	0	0	0	0	0.483587	20.5164	0	0	0	0	0	0	0	0	0	3181.33	0	0	0	0	0
351	Fukuoka	Japan	Eastern Asia	4.11923e+08	11672004	4062682	Asia	2.11514e+06	1.05346e+06	973745	40223.6	0	0	0	0	0	0	0	196.707	173.869	16.6792	0	0	0	0	0	0	0	5355.48	5600.46	2411.6	0	0	0	0	0	0	0
988	San Salvador	El Salvador	Central America	2.16704e+08	-8780431	1689106	North America	1.52808e+06	0	0	0	0	0	0	0	0	867822	660261	0	0	0	0	0	0	0	0	123.558	94.4416	0	0	0	0	0	0	0	0	7023.58	6991.21
384	Granada	Nicaragua	Central America	1.19265e+07	-8499250	1471250	North America	85987.6	0	0	0	0	0	0	0	0	0	85987.6	0	0	0	0	0	0	0	0	0	12	0	0	0	0	0	0	0	0	0	7165.63
904	Popayán	Colombia	South America	2.28466e+07	-7673848	302283	South America	140917	0	0	0	0	0	0	17968.3	122949	0	0	0	0	0	0	0	0	3.62049	19.3795	0	0	0	0	0	0	0	0	4962.95	6344.29	0	0
1154	Trier	Germany	Western Europe	1.50165e+07	506700	5846967	Europe	58327.6	0	0	0	0	15762.9	42564.7	0	0	0	0	0	0	0	0	6.31787	8.68213	0	0	0	0	0	0	0	0	2494.98	4902.56	0	0	0	0
807	Nkongsamba	Cameroon	Middle Africa	1.58945e+07	993500	613000	Africa	117925	0	0	0	0	0	0	117925	0	0	0	0	0	0	0	0	0	16	0	0	0	0	0	0	0	0	0	7370.28	0	0	0
1252	Zalingei	Sudan	Northern Africa	1.19276e+07	2315333	1591250	Africa	74133.6	0	74133.6	0	0	0	0	0	0	0	0	0	12	0	0	0	0	0	0	0	0	0	6177.8	0	0	0	0	0	0	0	0
565	Kisumu	Kenya	Eastern Africa	4.46988e+07	3485122	-11122	Africa	209368	0	0	0	0	1910.53	196716	10741.7	0	0	0	0	0	0	0	1.23644	40.0814	3.68217	0	0	0	0	0	0	0	1545.18	4907.92	2917.22	0	0	0
567	Kitakyushu	Japan	Eastern Asia	3.36143e+08	11682933	4096927	Asia	1.1644e+06	92034.1	733084	330878	8405.22	0	0	0	0	0	0	27.7581	203.786	99.9238	5.53237	0	0	0	0	0	0	3315.58	3597.32	3311.3	1519.28	0	0	0	0	0	0
406	Hamilton	New Zealand	Australia and New Zealand	5.89006e+07	15179178	-4539568	Oceania	79220.2	5510	0	0	0	0	0	0	0	0	0	4.51135	0	0	0	0	0	0	0	0	0	1221.36	0	0	0	0	0	0	0	0	0
290	Dekemhare	Eritrea	Eastern Africa	7.95364e+06	3829250	1855000	Africa	59676	59676	0	0	0	0	0	0	0	0	0	8	0	0	0	0	0	0	0	0	0	7459.5	0	0	0	0	0	0	0	0	0
1085	Taipei	Taiwan	Eastern Asia	7.41788e+08	11452391	3056007	Asia	6813482	0	0	0	0	26758	364404	634598	1976498	3.38382e+06	427403	0	0	0	0	7.30649	92.7804	132.379	184.804	275.28	52.4493	0	0	0	0	3662.22	3927.6	4793.78	10695.1	12292.3	8148.88
825	Omura	Japan	Eastern Asia	3.39063e+07	11684794	3983765	Asia	85630.6	0	0	0	0	0	859.492	84771.1	0	0	0	0	0	0	0	0	1.88563	32.1144	0	0	0	0	0	0	0	0	455.812	2639.66	0	0	0
102	Auckland	New Zealand	Australia and New Zealand	5.52956e+08	15249585	-4439421	Oceania	738606	0	0	0	0	0	0	0	35140.7	331480	371985	0	0	0	0	0	0	0	31.4446	246.499	276.056	0	0	0	0	0	0	0	1117.54	1344.75	1347.5
321	El Progreso	Honduras	Central America	1.69022e+07	-8603382	1895500	North America	87124.7	0	0	0	0	84885.6	2239.09	0	0	0	0	0	0	0	0	15.8814	1.11858	0	0	0	0	0	0	0	0	5344.97	2001.72	0	0	0	0
694	Matagalpa	Nicaragua	Central America	9.93972e+06	-8475800	1593300	North America	82311	0	82311	0	0	0	0	0	0	0	0	0	10	0	0	0	0	0	0	0	0	0	8231.1	0	0	0	0	0	0	0	0
199	Cali	Colombia	South America	1.5397e+08	-7660565	423919	South America	1.63256e+06	0	461338	1.17123e+06	0	0	0	0	0	0	0	0	43.4597	111.54	0	0	0	0	0	0	0	0	10615.3	10500.5	0	0	0	0	0	0	0
255	Cologne	Germany	Western Europe	2.58357e+08	524744	5975620	Europe	908012	334322	548141	0	0	0	0	0	0	0	0	133.916	116.249	0	0	0	0	0	0	0	0	2496.51	4715.22	0	0	0	0	0	0	0	0
314	Dschang	Cameroon	Middle Africa	1.3908e+07	1005286	673500	Africa	50172.6	0	50172.6	0	0	0	0	0	0	0	0	0	14	0	0	0	0	0	0	0	0	0	3583.76	0	0	0	0	0	0	0	0
322	Eldoret	Kenya	Eastern Africa	2.88059e+07	3533362	65810	Africa	83882.8	67586	16296.8	0	0	0	0	0	0	0	0	24.0915	4.9085	0	0	0	0	0	0	0	0	2805.39	3320.13	0	0	0	0	0	0	0	0
693	Massawa	Eritrea	Eastern Africa	1.78969e+07	3864000	1921278	Africa	97469.9	97469.9	0	0	0	0	0	0	0	0	0	18	0	0	0	0	0	0	0	0	0	5415	0	0	0	0	0	0	0	0	0
234	Chuncheon	South Korea	Eastern Asia	2.49584e+07	11053380	4550620	Asia	178843	0	0	0	167244	11599.2	0	0	0	0	0	0	0	0	20.5949	4.40513	0	0	0	0	0	0	0	0	8120.66	2633.11	0	0	0	0	0
775	Nagasaki	Japan	Eastern Asia	8.07744e+07	11688735	3967093	Asia	350062	0	0	0	0	0	233318	116744	0	0	0	0	0	0	0	0	57.4935	23.5065	0	0	0	0	0	0	0	0	4058.16	4966.45	0	0	0
232	Choluteca	Honduras	Central America	1.49102e+07	-8592367	1639167	North America	89149.9	0	0	0	0	6350.37	82799.5	0	0	0	0	0	0	0	0	1.86571	13.1343	0	0	0	0	0	0	0	0	3403.73	6304.07	0	0	0	0
1226	Wum	Cameroon	Middle Africa	6.95429e+06	1005929	789500	Africa	52735.8	0	0	0	0	11892.8	40842.9	0	0	0	0	0	0	0	0	2.26395	4.73605	0	0	0	0	0	0	0	0	5253.15	8623.83	0	0	0	0
532	Kebkabiya	Sudan	Northern Africa	1.39167e+07	2372357	1681571	Africa	214796	0	91042.6	123754	0	0	0	0	0	0	0	0	5.48186	8.51814	0	0	0	0	0	0	0	0	16608	14528.3	0	0	0	0	0	0	0
959	Saga	Japan	Eastern Asia	2.69276e+07	11687907	4022574	Asia	91192	0	0	0	0	91192	0	0	0	0	0	0	0	0	0	27	0	0	0	0	0	0	0	0	0	3377.48	0	0	0	0	0
727	Mexicali	Mexico	Central America	1.37611e+08	-10402275	3949167	North America	448198	0	0	0	0	0	0	86391.8	315774	46032.7	0	0	0	0	0	0	0	26.9114	97.4911	13.5975	0	0	0	0	0	0	0	3210.23	3239	3385.38	0
1185	Usulután	El Salvador	Central America	1.29222e+07	-8714654	1644115	North America	58114.2	0	0	0	0	0	0	0	0	9564.27	48550	0	0	0	0	0	0	0	0	4.00195	8.99805	0	0	0	0	0	0	0	0	2389.91	5395.61
1113	Tegucigalpa	Honduras	Central America	9.64271e+07	-8576294	1734438	North America	720966	704785	3515.27	0	0	0	0	0	0	0	0	91.6687	1.32987	0	0	0	0	0	0	0	0	7688.39	2643.31	0	0	0	0	0	0	0	0
177	Bonn	Germany	Western Europe	2.44326e+08	534176	5955160	Europe	621774	0	56817.1	244619	306291	14047.3	0	0	0	0	0	0	17.0978	115.883	106.198	4.822	0	0	0	0	0	0	3323.06	2110.92	2884.16	2913.18	0	0	0	0	0
120	Bamenda	Cameroon	Middle Africa	5.36463e+07	1014759	736944	Africa	185973	0	0	0	0	90445.5	95527.6	0	0	0	0	0	0	0	0	22.3365	31.6635	0	0	0	0	0	0	0	0	4049.22	3016.96	0	0	0	0
527	Kas	Sudan	Northern Africa	1.19272e+07	2398583	1541583	Africa	111716	0	0	0	0	29755.3	81960.4	0	0	0	0	0	0	0	0	3.39458	8.60542	0	0	0	0	0	0	0	0	8765.52	9524.28	0	0	0	0
216	Chauk	Myanmar	South-Eastern Asia	7.96e+06	9112000	2561500	Asia	53926.3	0	0	0	0	0	53926.3	0	0	0	0	0	0	0	0	0	8	0	0	0	0	0	0	0	0	0	6740.79	0	0	0	0
863	Pangkalan Brandan	Indonesia	South-Eastern Asia	1.49006e+07	9835500	496100	Asia	94547.9	35000.3	59547.6	0	0	0	0	0	0	0	0	4.70113	10.2989	0	0	0	0	0	0	0	0	7445.08	5781.96	0	0	0	0	0	0	0	0
457	Iizuka	Japan	Eastern Asia	2.89246e+07	11690672	4066914	Asia	79171.7	0	0.453125	79171.2	0	0	0	0	0	0	0	0	0.000412532	28.9996	0	0	0	0	0	0	0	0	1098.4	2730.08	0	0	0	0	0	0	0
982	San Luis Río Colorado	Mexico	Central America	4.28772e+07	-10353453	3929035	North America	81722.2	0	0	0	0	54638.7	27083.6	0	0	0	0	0	0	0	0	27.6461	15.3539	0	0	0	0	0	0	0	0	1976.36	1763.95	0	0	0	0
999	Santa Lucía Cotzumalguapa	Guatemala	Central America	6.95885e+06	-8946071	1765643	North America	57084.1	0	0	0	0	0	0	0	50747.4	6336.7	0	0	0	0	0	0	0	0	6.33171	0.668288	0	0	0	0	0	0	0	0	8014.8	9481.98	0
983	San Miguel	El Salvador	Central America	2.88268e+07	-8686466	1661052	North America	152398	0	0	0	0	0	0	0	0	55462.1	96936.3	0	0	0	0	0	0	0	0	9.97733	19.0227	0	0	0	0	0	0	0	0	5558.81	5095.83
680	Manisa	Turkey	Western Asia	1.99701e+07	2356000	4634200	Asia	132154	122249	0	0	0	0	0	0	0	0	0	15.6406	0	0	0	0	0	0	0	0	0	7816.11	0	0	0	0	0	0	0	0	0
782	Nakuru	Kenya	Eastern Africa	3.87389e+07	3616449	-35603	Africa	145894	0	0	0	0	0	0	0	0	108631	37263.2	0	0	0	0	0	0	0	0	23.7856	15.2144	0	0	0	0	0	0	0	0	4567.08	2449.2
853	Pakokku	Myanmar	South-Eastern Asia	1.19408e+07	9120167	2614583	Asia	83365.7	0	0	0	0	10612.9	72752.8	0	0	0	0	0	0	0	0	2.32597	9.67403	0	0	0	0	0	0	0	0	4562.8	7520.42	0	0	0	0
1038	Sidiangkat	Indonesia	South-Eastern Asia	1.192e+07	9846833	339333	Asia	73670.1	0	0	0	0	0	73670.1	0	0	0	0	0	0	0	0	0	12	0	0	0	0	0	0	0	0	0	6139.18	0	0	0	0
380	Gonghuakeng	Taiwan	Eastern Asia	1.69268e+07	11442559	3060500	Asia	78994.4	0	0	0	0	0	0	0	71374.2	7620.27	0	0	0	0	0	0	0	0	15.4415	1.55851	0	0	0	0	0	0	0	0	4622.23	4889.45	0
1148	Tosu	Japan	Eastern Asia	2.69283e+07	11697981	4037574	Asia	85707.1	0	0	78532.8	7174.27	0	0	0	0	0	0	0	0	23.3052	3.69481	0	0	0	0	0	0	0	0	3369.76	1941.72	0	0	0	0	0	0
708	Mbouda	Cameroon	Middle Africa	1.19212e+07	1024750	694917	Africa	52571.2	0	0	52571.2	0	0	0	0	0	0	0	0	0	12	0	0	0	0	0	0	0	0	0	4380.94	0	0	0	0	0	0	0
710	Medan	Indonesia	South-Eastern Asia	4.74825e+08	9875738	445050	Asia	2934075	0	0	0	40111.2	310397	1.95922e+06	624348	0	0	0	0	0	0	16.8421	77.0233	263.273	120.861	0	0	0	0	0	0	2381.61	4029.92	7441.77	5165.82	0	0	0
468	Isahaya	Japan	Eastern Asia	2.99168e+07	11698667	3974200	Asia	101400	0	0	0	0	0	0	10485	90915.4	0	0	0	0	0	0	0	0	3.31094	26.6891	0	0	0	0	0	0	0	0	3166.79	3406.46	0	0
109	Bafoussam	Cameroon	Middle Africa	3.97371e+07	1040825	677775	Africa	179190	0	179190	0	0	0	0	0	0	0	0	0	40	0	0	0	0	0	0	0	0	0	4479.74	0	0	0	0	0	0	0	0
778	Nairobi	Kenya	Eastern Africa	2.85081e+08	3689911	-156389	Africa	1.48946e+06	0	0	0	515865	663261	251428	58908.4	0	0	0	0	0	0	83.6137	107.174	72.1391	24.0734	0	0	0	0	0	0	6169.62	6188.65	3485.32	2447.04	0	0	0
1056	Stabat	Indonesia	South-Eastern Asia	1.58938e+07	9854688	463625	Asia	109000	0	0	0	0	109000	0	0	0	0	0	0	0	0	0	16	0	0	0	0	0	0	0	0	0	6812.5	0	0	0	0	0
231	Chitose	Japan	Eastern Asia	1.69912e+07	11704853	5103735	Asia	58386.6	0	0	0	0	0	0	16.2109	58370.4	0	0	0	0	0	0	0	0	0.235838	16.7642	0	0	0	0	0	0	0	0	68.7376	3481.85	0	0
824	Olongapo	Philippines	South-Eastern Asia	2.48545e+07	11806020	1826820	Asia	187264	0	0	0	0	0	0	181186	6078.07	0	0	0	0	0	0	0	0	22.7662	2.23376	0	0	0	0	0	0	0	0	7958.54	2721.01	0	0
106	Babahoyo	Ecuador	South America	1.29131e+07	-7967654	-223115	South America	60615.3	0	60615.3	0	0	0	0	0	0	0	0	0	13	0	0	0	0	0	0	0	0	0	4662.72	0	0	0	0	0	0	0	0
856	Palmira	Colombia	South America	2.18538e+07	-7637864	436682	South America	171962	0	0	171962	0	0	0	0	0	0	0	0	0	22	0	0	0	0	0	0	0	0	0	7816.45	0	0	0	0	0	0	0
627	Liège	Belgium	Western Europe	1.09142e+08	419555	5939784	Europe	330182	10605	0	0	0	0	0	0	0	0	0	4.27098	0	0	0	0	0	0	0	0	0	2483.05	0	0	0	0	0	0	0	0	0
504	Kabanjahe	Indonesia	South-Eastern Asia	1.09268e+07	9862500	383682	Asia	65586.4	0	0	0	0	0	0	0	0	65586.4	0	0	0	0	0	0	0	0	0	11	0	0	0	0	0	0	0	0	0	5962.4	0
599	Kurume	Japan	Eastern Asia	3.88958e+07	11704449	4028654	Asia	178861	0	0	0	178861	0	0	0	0	0	0	0	0	0	39	0	0	0	0	0	0	0	0	0	4586.19	0	0	0	0	0	0
1099	Tarlac City	Philippines	South-Eastern Asia	3.18161e+07	11813656	1904781	Asia	115150	0	0	0	0	339.078	114811	0	0	0	0	0	0	0	0	0.469092	31.5309	0	0	0	0	0	0	0	0	722.839	3641.23	0	0	0	0
332	Escuintla	Guatemala	Central America	1.39176e+07	-8923429	1761286	North America	58424.1	0	0	0	0	0	0	0	6427.86	51996.3	0	0	0	0	0	0	0	0	2.03125	11.9687	0	0	0	0	0	0	0	0	3164.48	4344.34	0
974	San Carlos de Bariloche	Argentina	South America	1.89827e+07	-5991026	-4917500	South America	59675.9	0	0	0	0	12399.2	47276.8	0	0	0	0	0	0	0	0	3.81765	15.1824	0	0	0	0	0	0	0	0	3247.85	3113.93	0	0	0	0
1171	Ube	Japan	Eastern Asia	5.98481e+07	11711683	4103967	Asia	117740	0	0	0	114935	2804.29	0	0	0	0	0	0	0	0	58.6183	1.38168	0	0	0	0	0	0	0	0	1960.74	2029.62	0	0	0	0	0
224	Chimaltenango	Guatemala	Central America	1.09357e+07	-8918318	1805045	North America	56905	0	0	0	0	0	0	0	2536.64	54368.3	0	0	0	0	0	0	0	0	1.36709	9.63291	0	0	0	0	0	0	0	0	1855.5	5644.02	0
797	Neuwied	Germany	Western Europe	2.60327e+07	562769	5918654	Europe	54846.3	0	0	0	0	41094.5	13751.8	0	0	0	0	0	0	0	0	20.0468	5.95317	0	0	0	0	0	0	0	0	2049.92	2310	0	0	0	0
595	Kumbo	Cameroon	Middle Africa	1.98692e+07	1066500	767350	Africa	98476.3	0	0	0	0	0	0	0	77523.7	20952.6	0	0	0	0	0	0	0	0	12.3898	7.61025	0	0	0	0	0	0	0	0	6257.08	2753.21	0
1077	Tabora	Tanzania	Eastern Africa	2.58286e+07	3280808	-620308	Africa	91851.4	74684.1	0	0	0	0	0	0	0	0	0	19.0516	0	0	0	0	0	0	0	0	0	3920.08	0	0	0	0	0	0	0	0	0
58	Antananarivo	Madagascar	Eastern Africa	1.28316e+08	4604136	-2316562	Africa	762892	447121	315771	0	0	0	0	0	0	0	0	60.2952	68.7048	0	0	0	0	0	0	0	0	7415.53	4596.05	0	0	0	0	0	0	0	0
648	Lubuk Pakam	Indonesia	South-Eastern Asia	1.49004e+07	9897633	440033	Asia	62690.9	0	0	0	0	62690.9	0	0	0	0	0	0	0	0	0	15	0	0	0	0	0	0	0	0	0	4179.4	0	0	0	0	0
767	Muroran	Japan	Eastern Asia	7.89501e+07	11709411	5050348	Asia	138431	0	0	0	0	0	0	0	60205	71295.2	6930.88	0	0	0	0	0	0	0	46.2151	30.7699	2.01509	0	0	0	0	0	0	0	1302.71	2317.05	3439.49
57	Angeles	Philippines	South-Eastern Asia	1.1334e+08	11828912	1862702	Asia	457745	0	0	0	0	0	44924.1	160729	252092	0	0	0	0	0	0	0	11.9835	37.1238	64.8927	0	0	0	0	0	0	0	3748.83	4329.53	3884.75	0	0
932	Quevedo	Ecuador	South America	2.48327e+07	-7963540	-126420	South America	102395	0	0	0	102395	0	0	0	0	0	0	0	0	0	25	0	0	0	0	0	0	0	0	0	4095.79	0	0	0	0	0	0
1165	Tuluá	Colombia	South America	1.49006e+07	-7624833	505033	South America	120649	47117.3	0	0	0	0	0	0	0	0	0	6.42815	0	0	0	0	0	0	0	0	0	7329.85	0	0	0	0	0	0	0	0	0
342	Foumban	Cameroon	Middle Africa	1.78819e+07	1088611	707778	Africa	115269	0	0	115197	72.0098	0	0	0	0	0	0	0	0	17.9457	0.0542873	0	0	0	0	0	0	0	0	6419.19	1326.46	0	0	0	0	0	0
771	Myingyan	Myanmar	South-Eastern Asia	1.0946e+07	9145136	2629045	Asia	71604.5	0	0	0	62876.8	8727.71	0	0	0	0	0	0	0	0	9.05645	1.94355	0	0	0	0	0	0	0	0	6942.76	4490.6	0	0	0	0	0
1035	Sibolga	Indonesia	South-Eastern Asia	1.39064e+07	9897643	214643	Asia	66346.9	66346.9	0	0	0	0	0	0	0	0	0	14	0	0	0	0	0	0	0	0	0	4739.07	0	0	0	0	0	0	0	0	0
1239	Yilan City	Taiwan	Eastern Asia	2.09085e+07	11495833	3023405	Asia	101470	0	0	0	0	0	0	0	101353	116.682	0	0	0	0	0	0	0	0	20.7235	0.27648	0	0	0	0	0	0	0	0	4890.74	422.027	0
389	Guatemala City	Guatemala	Central America	3.21111e+08	-8893014	1797646	North America	1.50957e+06	0	0	0	0	0	0	408280	651263	441406	8622.21	0	0	0	0	0	0	80.699	150.237	89.7213	2.34312	0	0	0	0	0	0	5059.29	4334.92	4919.75	3679.79
1006	Santo Domingo de los Tsachilas	Ecuador	South America	3.07925e+07	-7935145	-31565	South America	106484	0	0	0	105478	1005.43	0	0	0	0	0	0	0	0	30.1513	0.848653	0	0	0	0	0	0	0	0	3498.29	1184.73	0	0	0	0	0
665	Magway	Myanmar	South-Eastern Asia	1.39284e+07	9150357	2471643	Asia	74681.8	74202.7	479.059	0	0	0	0	0	0	0	0	13.5485	0.451526	0	0	0	0	0	0	0	0	5476.83	1060.98	0	0	0	0	0	0	0	0
654	Luodong	Taiwan	Eastern Asia	2.09082e+07	11501881	3014595	Asia	95302.8	0	0	0	0	0	0	0.117188	95302.7	0	0	0	0	0	0	0	0	0.00192163	20.9981	0	0	0	0	0	0	0	0	60.9835	4538.64	0	0
981	San Juan Sacatepéquez	Guatemala	Central America	7.95332e+06	-8900125	1812750	North America	52565.9	0	0	0	0	0	0	31402.8	21163.1	0	0	0	0	0	0	0	0	4.96893	3.03107	0	0	0	0	0	0	0	0	6319.83	6982.05	0	0
203	Cartago	Colombia	South America	1.39076e+07	-7592786	587000	South America	93546.8	0	0	0	90252.3	3294.5	0	0	0	0	0	0	0	0	13.0458	0.954199	0	0	0	0	0	0	0	0	6918.11	3452.63	0	0	0	0	0
439	Hualien	Taiwan	Eastern Asia	7.26721e+07	11525295	2933048	Asia	193103	49542.7	0	0	0	0	0	0	0	0	0	31.8634	0	0	0	0	0	0	0	0	0	1554.85	0	0	0	0	0	0	0	0	0
1143	Tomakomai	Japan	Eastern Asia	5.4969e+07	11724645	5081973	Asia	133444	0	0	0	0	0	0	0	49897.7	83545.8	0	0	0	0	0	0	0	0	25.8278	29.1722	0	0	0	0	0	0	0	0	1931.94	2863.88	0
890	Pereira	Colombia	South America	4.86766e+07	-7570133	595031	South America	366566	0	0	0	0	0	55509.2	311056	0	0	0	0	0	0	0	0	10.3256	38.6744	0	0	0	0	0	0	0	0	5375.88	8042.95	0	0	0
1169	Turgutlu	Turkey	Western Asia	8.98631e+06	2384722	4620944	Asia	62659.9	0	0	61738.3	921.664	0	0	0	0	0	0	0	0	8.37784	0.622162	0	0	0	0	0	0	0	0	7369.24	1481.39	0	0	0	0	0	0
1131	Thika	Kenya	Eastern Africa	2.18528e+07	3717182	-130636	Africa	85001.1	0	0	84996.8	4.32738	0	0	0	0	0	0	0	0	21.8766	0.12339	0	0	0	0	0	0	0	0	3885.28	35.0708	0	0	0	0	0	0
5	Abha	Saudi Arabia	Western Asia	2.88436e+07	4128052	2238086	Asia	136017	135710	0	0	0	0	0	0	0	0	0	28.3164	0	0	0	0	0	0	0	0	0	4792.63	0	0	0	0	0	0	0	0	0
145	Bayt al Faqih	Yemen	Western Asia	5.96485e+06	4256000	1787500	Asia	72737.1	0	72737.1	0	0	0	0	0	0	0	0	0	6	0	0	0	0	0	0	0	0	0	12122.9	0	0	0	0	0	0	0	0
826	Omuta	Japan	Eastern Asia	7.08059e+07	11721613	3994838	Asia	160432	0	0	0	0	0	0	115088	45343.7	0	0	0	0	0	0	0	0	44.6025	26.3975	0	0	0	0	0	0	0	0	2580.3	1717.72	0	0
679	Manila	Philippines	South-Eastern Asia	1.74971e+09	11881466	1797698	Asia	13513606	0	93507	1961327	5041428	3.62995e+06	1.56751e+06	788066	267948	124970	38904.3	0	23.1659	268.872	370.766	394.614	366.206	199.692	77.6508	44.5386	14.4941	0	4036.41	7294.66	13597.3	9198.72	4280.4	3946.4	3450.68	2805.87	2684.14
1190	Vallejo	United States of America	Northern America	6.19004e+07	-10555984	4578306	North America	106232	7703.91	0	0	0	0	0	0	0	0	0	8.16848	0	0	0	0	0	0	0	0	0	943.126	0	0	0	0	0	0	0	0	0
947	Riobamba	Ecuador	South America	2.88062e+07	-7880603	-206293	South America	118264	0	0	0	0	0	0	0	0	118264	0	0	0	0	0	0	0	0	0	28.9995	0.000474762	0	0	0	0	0	0	0	0	4078.15	0
1005	Santiago	Chile	South America	5.80467e+08	-6326969	-4049242	South America	4227932	12118.5	1.41475e+06	2.29643e+06	504638	0	0	0	0	0	0	2.51505	187.787	287.764	103.933	0	0	0	0	0	0	4818.4	7533.76	7980.24	4855.41	0	0	0	0	0	0
576	Koblenz	Germany	Western Europe	4.10507e+07	574695	5910207	Europe	108590	0	0	0	5240.59	103349	0	0	0	0	0	0	0	0	1.73431	39.2657	0	0	0	0	0	0	0	0	3021.72	2632.05	0	0	0	0	0
24	Akhisar	Turkey	Western Asia	1.09843e+07	2387318	4668409	Asia	67119.5	0	0	45423.3	21696.2	0	0	0	0	0	0	0	0	6.06968	4.93032	0	0	0	0	0	0	0	0	7483.63	4400.57	0	0	0	0	0	0
707	Mbeya	Tanzania	Eastern Africa	4.17322e+07	3327905	-1100190	Africa	121593	0	0	0	0	0	0	0	0	121593	0	0	0	0	0	0	0	0	0	42	0	0	0	0	0	0	0	0	0	2895.08	0
887	Pematang Siantar	Indonesia	South-Eastern Asia	6.05938e+07	9922516	367221	Asia	410104	0	0	0	0	47237.4	362867	0	0	0	0	0	0	0	0	23.0608	37.9392	0	0	0	0	0	0	0	0	2048.38	9564.43	0	0	0	0
477	Izumo	Japan	Eastern Asia	3.19288e+07	11722875	4264938	Asia	87699.6	0	0	0	0	0	0	1483.88	86215.8	0	0	0	0	0	0	0	0	1.25288	30.7471	0	0	0	0	0	0	0	0	1184.37	2804.03	0	0
116	Balanga	Philippines	South-Eastern Asia	2.68423e+07	11836870	1807500	Asia	73173.3	0	0	0	0	73173.3	0	0	0	0	0	0	0	0	0	27	0	0	0	0	0	0	0	0	0	2710.12	0	0	0	0	0
51	Ambato	Ecuador	South America	4.66857e+07	-7878138	-155436	South America	142182	0	0	0	0	0	0	90480.9	51701	0	0	0	0	0	0	0	0	23.3012	23.6988	0	0	0	0	0	0	0	0	3883.1	2181.59	0	0
1109	Tebing Tinggi	Indonesia	South-Eastern Asia	3.07939e+07	9927435	412629	Asia	172017	0	0	166959	5057.96	0	0	0	0	0	0	0	0	28.518	2.48197	0	0	0	0	0	0	0	0	5854.5	2037.88	0	0	0	0	0	0
430	Hofu	Japan	Eastern Asia	3.8902e+07	11735321	4113115	Asia	101697	0	0	0	0	23084.1	78612.7	0	0	0	0	0	0	0	0	13.37	25.63	0	0	0	0	0	0	0	0	1726.56	3067.21	0	0	0	0
483	Jalapa	Guatemala	Central America	8.9474e+06	-8836944	1802167	North America	52821.1	0	0	0	0	0	0	0	52821.1	0	0	0	0	0	0	0	0	0	9	0	0	0	0	0	0	0	0	0	5869.01	0	0
18	Agadez	Niger	Western Africa	1.69055e+07	778735	2086735	Africa	109553	109553	0	0	0	0	0	0	0	0	0	17	0	0	0	0	0	0	0	0	0	6444.27	0	0	0	0	0	0	0	0	0
958	Sabya	Saudi Arabia	Western Asia	9.94463e+06	4154800	2108700	Asia	56160.7	0	0	0	0	0	0	0	56160.7	0	0	0	0	0	0	0	0	0	10	0	0	0	0	0	0	0	0	0	5616.07	0	0
844	Padang Sidempuan	Indonesia	South-Eastern Asia	2.18529e+07	9947455	171318	Asia	132268	0	128172	4096.19	0	0	0	0	0	0	0	0	20.6661	1.33393	0	0	0	0	0	0	0	0	6202.04	3070.76	0	0	0	0	0	0	0
698	Matsue	Japan	Eastern Asia	3.29273e+07	11742197	4276106	Asia	87272.4	0	0	0	0	87239.8	32.5678	0	0	0	0	0	0	0	0	32.9269	0.0730898	0	0	0	0	0	0	0	0	2649.5	445.586	0	0	0	0
917	Puerto Vallarta	Mexico	Central America	2.5869e+07	-10121423	2531692	North America	82733.8	0	0	0	0	0	82733.8	0	0	0	0	0	0	0	0	0	25.9821	0.0178638	0	0	0	0	0	0	0	0	3184.26	0	0	0	0
935	Quito	Ecuador	South America	3.01965e+08	-7866365	-25319	South America	1.29269e+06	0	0	0	0	0	0	0	12132.4	1.18605e+06	94511.8	0	0	0	0	0	0	0	7.1753	262.649	34.1762	0	0	0	0	0	0	0	1690.85	4515.72	2765.43
77	Armenia	Colombia	South America	2.58281e+07	-7570423	560538	South America	194106	0	0	0	0	0	0	193956	149.694	0	0	0	0	0	0	0	0	25.7112	0.288794	0	0	0	0	0	0	0	0	7543.65	518.342	0	0
7	Abu `Arish	Saudi Arabia	Western Asia	8.94995e+06	4176167	2086389	Asia	86940.9	0	0	0	0	0	0	0	0	4222.41	82718.5	0	0	0	0	0	0	0	0	0.790982	8.20902	0	0	0	0	0	0	0	0	5338.19	10076.5
561	Kisaran	Indonesia	South-Eastern Asia	2.48335e+07	9977900	368140	Asia	166461	157723	0	0	0	0	0	0	0	0	0	22.5467	0	0	0	0	0	0	0	0	0	6995.41	0	0	0	0	0	0	0	0	0
404	Hakodate	Japan	Eastern Asia	7.89399e+07	11750741	4988943	Asia	313920	0	0	0	0	0	0	162426	151495	0	0	0	0	0	0	0	0	42.8291	36.1709	0	0	0	0	0	0	0	0	3792.41	4188.3	0	0
1093	Talca	Chile	South America	2.79381e+07	-6324357	-4272500	South America	135806	0	134288	1517.84	0	0	0	0	0	0	0	0	27.0041	0.995895	0	0	0	0	0	0	0	0	4972.87	1524.1	0	0	0	0	0	0	0
720	Mellit	Sudan	Northern Africa	1.09351e+07	2512136	1740864	Africa	61536.2	0	0	0	3488.76	58047.5	0	0	0	0	0	0	0	0	1.1032	9.8968	0	0	0	0	0	0	0	0	3162.39	5865.28	0	0	0	0	0
969	Samitah	Saudi Arabia	Western Asia	8.94952e+06	4191278	2040389	Asia	60947.8	0	0	0	0	60947.8	0	0	0	0	0	0	0	0	0	9	0	0	0	0	0	0	0	0	0	6771.98	0	0	0	0	0
867	Panyabungan	Indonesia	South-Eastern Asia	9.93309e+06	9977700	106800	Asia	92991.3	0	0	0	0	0	0	0	18699.2	74292.1	0	0	0	0	0	0	0	0	4.1445	5.8555	0	0	0	0	0	0	0	0	4511.81	12687.6	0
1034	Shunan	Japan	Eastern Asia	6.78291e+07	11757338	4113059	Asia	188258	0	0	0	32442.3	152736	3080.04	0	0	0	0	0	0	0	14.2674	52.7647	0.967949	0	0	0	0	0	0	0	2273.88	2894.65	3182.03	0	0	0	0
1160	Tuguegarao	Philippines	South-Eastern Asia	1.98905e+07	11842200	2165850	Asia	54605	0	10127.8	44477.2	0	0	0	0	0	0	0	0	5.54031	14.4597	0	0	0	0	0	0	0	0	1828.03	3075.94	0	0	0	0	0	0	0
267	Curicó	Chile	South America	1.19723e+07	-6309500	-4221500	South America	56151.5	0	0	0	56151.5	0	0	0	0	0	0	0	0	0	12	0	0	0	0	0	0	0	0	0	4679.29	0	0	0	0	0	0
104	Aydin	Turkey	Western Asia	1.4975e+07	2409500	4546967	Asia	110124	2429.31	0	0	0	0	0	0	0	0	0	1.83233	0	0	0	0	0	0	0	0	0	1325.8	0	0	0	0	0	0	0	0	0
593	Kumamoto	Japan	Eastern Asia	1.47589e+08	11764973	3971000	Asia	598670	0	0	0	0	0	0	513400	85269.5	0	0	0	0	0	0	0	0	114.901	33.0991	0	0	0	0	0	0	0	0	4468.2	2576.19	0	0
450	Ibarra	Ecuador	South America	2.2846e+07	-7829283	43674	South America	83268.8	0	0	0	0	0	0	0	0	75233.3	8035.44	0	0	0	0	0	0	0	0	20.0106	2.98938	0	0	0	0	0	0	0	0	3759.67	2688
1243	Yonago	Japan	Eastern Asia	4.98897e+07	11768160	4274400	Asia	139248	0	0	138347	901.198	0	0	0	0	0	0	0	0.00669297	48.6968	1.29653	0	0	0	0	0	0	0	0	2840.99	695.084	0	0	0	0	0	0
193	Cabanatuan	Philippines	South-Eastern Asia	1.78966e+07	11849833	1906333	Asia	80174.3	0	759.477	79414.8	0	0	0	0	0	0	0	0	0.143068	17.8569	0	0	0	0	0	0	0	0	5308.51	4447.28	0	0	0	0	0	0	0
223	Chillán	Chile	South America	2.29552e+07	-6305587	-4407457	South America	119279	0	0	89738.9	29540.1	0	0	0	0	0	0	0	0	17.0368	5.96319	0	0	0	0	0	0	0	0	5267.35	4953.75	0	0	0	0	0	0
568	Kitami	Japan	Eastern Asia	2.49927e+07	11770780	5210300	Asia	96322.6	0	0	0	0	1941.21	94381.4	0	0	0	0	0	0	0	0	0.523597	24.4764	0	0	0	0	0	0	0	0	3707.45	3856.02	0	0	0	0
1124	Tepic	Mexico	Central America	5.274e+07	-10052877	2634651	North America	202614	0	0	0	0	0	0	0	22172.6	180441	0	0	0	0	0	0	0	0	5.2358	47.718	0.0462429	0	0	0	0	0	0	0	4234.81	3781.41	0
681	Manizales	Colombia	South America	4.07298e+07	-7548159	624744	South America	328302	0	0	0	0	0	0	0	300133	28169.3	0	0	0	0	0	0	0	0	33.6981	7.30189	0	0	0	0	0	0	0	0	8906.52	3857.81	0
938	Rancagua	Chile	South America	2.69329e+07	-6303352	-4127574	South America	152196	0	0	0	152196	0	0	0	0	0	0	0	0	0	27	0	0	0	0	0	0	0	0	0	5636.88	0	0	0	0	0	0
821	Ödemis	Turkey	Western Asia	7.98734e+06	2413375	4590625	Asia	63812.9	0	0	0	63357.4	455.494	0	0	0	0	0	0	0	0	7.44501	0.554992	0	0	0	0	0	0	0	0	8510.05	820.721	0	0	0	0	0
714	Meiktila	Myanmar	South-Eastern Asia	2.0895e+07	9212357	2560262	Asia	83481.4	0	0	0	83481.4	0	0	0	0	0	0	0	0	0	21	0	0	0	0	0	0	0	0	0	3975.3	0	0	0	0	0	0
425	Hiroshima	Japan	Eastern Asia	2.98272e+08	11782343	4154824	Asia	1.29822e+06	2345.62	740919	527040	27916.2	0	0	0	0	0	0	3.96227	140.764	145.464	8.80998	0	0	0	0	0	0	591.991	5263.55	3623.17	3168.7	0	0	0	0	0	0
337	Fairfield	United States of America	Northern America	3.19496e+07	-10524719	4594156	North America	68409.1	9606.63	0	0	0	0	0	0	0	0	0	5.43716	0	0	0	0	0	0	0	0	0	1766.85	0	0	0	0	0	0	0	0	0
254	Colima	Mexico	Central America	4.37691e+07	-10032750	2363045	North America	141175	0	0	0	0	0	0	114503	26671.9	0	0	0	0	0	0	0	0	34.5017	9.49834	0	0	0	0	0	0	0	0	3318.76	2808.06	0	0
795	Neiva	Colombia	South America	2.68202e+07	-7538463	362796	South America	202118	0	202118	0	0	0	0	0	0	0	0	0	27	0	0	0	0	0	0	0	0	0	7485.84	0	0	0	0	0	0	0	0
1213	Wiesbaden	Germany	Western Europe	1.00116e+08	627110	5876500	Europe	340303	126085	0	0	0	0	0	0	0	0	0	33.4011	0	0	0	0	0	0	0	0	0	3774.86	0	0	0	0	0	0	0	0	0
1236	Yatsushiro	Japan	Eastern Asia	2.69232e+07	11777870	3935574	Asia	76351.6	0	0	0	0	0	48777.9	27573.7	0	0	0	0	0	0	0	0	16.3322	10.6678	0	0	0	0	0	0	0	0	2986.61	2584.75	0	0	0
244	Ciudad Guzmán	Mexico	Central America	1.59171e+07	-9990438	2417375	North America	79229.3	0	0	0	0	0	0	0	79229.3	0	0	0	0	0	0	0	0	0	16	0	0	0	0	0	0	0	0	0	4951.83	0	0
968	Salihli	Turkey	Western Asia	8.98628e+06	2422944	4619167	Asia	73036.9	0	0	0	0	0	0	73036.9	0	0	0	0	0	0	0	0	0	9	0	0	0	0	0	0	0	0	0	8115.21	0	0	0
475	Iwakuni	Japan	Eastern Asia	6.38409e+07	11782516	4127672	Asia	139283	0	0	139283	0	0	0	0	0	0	0	0	0	64	0	0	0	0	0	0	0	0	0	2176.3	0	0	0	0	0	0	0
1119	Temuco	Chile	South America	3.09545e+07	-6236016	-4647435	South America	139800	0	89.5469	139710	0	0	0	0	0	0	0	0	0.0944859	30.9055	0	0	0	0	0	0	0	0	947.727	4520.56	0	0	0	0	0	0	0
843	Padang	Indonesia	South-Eastern Asia	1.75816e+08	10059782	-113353	Asia	753210	0	0	0	0	0	76474.9	557191	119545	0	0	0	0	0	0	0	28.5081	109.445	39.0469	0	0	0	0	0	0	0	2682.57	5091.06	3061.57	0	0
156	Beppu	Japan	Eastern Asia	3.49064e+07	11791557	4027871	Asia	118696	0	0	0	0	0	0	0	0	57442	61254.1	0	0	0	0	0	0	0	0	18.1417	16.8583	0	0	0	0	0	0	0	0	3166.31	3633.46
449	Ibagué	Colombia	South America	3.77486e+07	-7523316	549026	South America	297092	0	0	0	0	0	0	0	126463	170629	0	0	0	0	0	0	0	0	23.0339	14.9661	0	0	0	0	0	0	0	0	5490.3	11401	0
183	Bukittinggi	Indonesia	South-Eastern Asia	3.27791e+07	10060864	-38288	Asia	211042	0	0	0	0	0	0	0	0	139786	71255.6	0	0	0	0	0	0	0	0	22.2921	10.7079	0	0	0	0	0	0	0	0	6270.66	6654.51
769	Musan	North Korea	Eastern Asia	6.99538e+06	10743643	5036643	Asia	82822.1	82484.9	0	0	0	0	0	0	0	0	0	6.75223	0	0	0	0	0	0	0	0	0	12215.9	0	0	0	0	0	0	0	0	0
488	Jeju-si	South Korea	Eastern Asia	4.08922e+07	11330378	4051890	Asia	158734	0	0	0	0	0	0	0	5091.06	153643	0	0	0	0	0	0	0	0	6.1829	34.8171	0	0	0	0	0	0	0	0	823.41	4412.86	0
597	Kure	Japan	Eastern Asia	2.19456e+07	11806273	4135909	Asia	102933	91871.5	0	0	0	0	0	0	0	0	0	20.6138	0	0	0	0	0	0	0	0	0	4456.79	0	0	0	0	0	0	0	0	0
834	Osorno	Chile	South America	2.09781e+07	-6178071	-4853976	South America	85965.5	0	35232.9	50732.6	0	0	0	0	0	0	0	0	9.54626	11.4537	0	0	0	0	0	0	0	0	3690.75	4429.34	0	0	0	0	0	0	0
789	Nazilli	Turkey	Western Asia	1.09818e+07	2450773	4555136	Asia	84145.7	0	0	84145.7	0	0	0	0	0	0	0	0	0	11	0	0	0	0	0	0	0	0	0	7649.61	0	0	0	0	0	0	0
89	Arusha	Tanzania	Eastern Africa	4.76809e+07	3672146	-416708	Africa	130541	0	0	0	0	0	0	0	11212.1	119329	0	0	0	0	0	0	0	0	6.12549	41.8745	0	0	0	0	0	0	0	0	1830.41	2849.68	0
822	Oita	Japan	Eastern Asia	1.05715e+08	11810906	4020849	Asia	285379	0	0	0	0	0	0	14854.5	228004	42520.6	0	0	0	0	0	0	0	13.806	77.3643	14.8298	0	0	0	0	0	0	0	1075.95	2947.15	2867.24	0
1187	Vacaville	United States of America	Northern America	2.79564e+07	-10512179	4603536	North America	56497.2	43630.6	0	0	0	0	0	0	0	0	0	21.7302	0	0	0	0	0	0	0	0	0	2007.83	0	0	0	0	0	0	0	0	0
916	Puerto Montt	Chile	South America	1.69858e+07	-6109676	-4953029	South America	78004.7	0	0	0	0	0	0	62198.7	15806	0	0	0	0	0	0	0	0	12.5166	4.48337	0	0	0	0	0	0	0	0	4969.28	3525.49	0	0
143	Batusangkar	Indonesia	South-Eastern Asia	1.2913e+07	10080731	-56577	Asia	53463.5	0	0	0	0	0	0	0	0	53463.5	0	0	0	0	0	0	0	0	0	13	0	0	0	0	0	0	0	0	0	4112.58	0
447	Hyesan	North Korea	Eastern Asia	1.49872e+07	10744567	4945833	Asia	156829	0	0	0	156829	0	0	0	0	0	0	0	0	0	15	0	0	0	0	0	0	0	0	0	10455.3	0	0	0	0	0	0
819	Obihiro	Japan	Eastern Asia	5.19742e+07	11821154	5113750	Asia	163252	0	0	0	1283.41	161968	0	0	0	0	0	0	0	0	0.780446	51.2196	0	0	0	0	0	0	0	0	1644.45	3162.24	0	0	0	0	0
317	Durango	Mexico	Central America	8.46187e+07	-9916359	2937406	North America	383911	0	0	0	0	0	0	3503.12	325661	54746.6	0	0	0	0	0	0	0	2.07607	70.7145	12.2094	0	0	0	0	0	0	0	1687.38	4605.29	4483.97	0
246	Ciudad Real	Spain	Southern Europe	6.99013e+06	-336786	4675500	Europe	51099.6	0	0	0	0	0	0	0	0	51099.6	0	0	0	0	0	0	0	0	0	7	0	0	0	0	0	0	0	0	0	7299.94	0
757	Moshi	Tanzania	Eastern Africa	2.28471e+07	3737935	-415500	Africa	77563	0	0	0	77563	0	0	0	0	0	0	0	0	0	23	0	0	0	0	0	0	0	0	0	3372.31	0	0	0	0	0	0
883	Payakumbuh	Indonesia	South-Eastern Asia	1.88728e+07	10085658	-28342	Asia	65369.2	0	0	0	0	0	0	0	65369.2	0	0	0	0	0	0	0	0	0	19	0	0	0	0	0	0	0	0	0	3440.49	0	0
416	Heerlen	Netherlands	Western Europe	7.41009e+07	450568	5967419	Europe	214625	78483.2	0	0	0	0	0	0	0	0	0	30.6376	0	0	0	0	0	0	0	0	0	2561.66	0	0	0	0	0	0	0	0	0
702	Mawza`	Yemen	Western Asia	2.98202e+06	4288167	1634833	Asia	57597.6	57597.6	0	0	0	0	0	0	0	0	0	3	0	0	0	0	0	0	0	0	0	19199.2	0	0	0	0	0	0	0	0	0
507	Kagoshima	Japan	Eastern Asia	1.27611e+08	11846539	3827250	Asia	521769	0	0	0	0	0	0	0	0	465359	56410.6	0	0	0	0	0	0	0	0	108.583	19.4172	0	0	0	0	0	0	0	0	4285.75	2905.19
160	Binangonan	Philippines	South-Eastern Asia	2.78359e+07	11907179	1783429	Asia	132692	0	0	0	0	0	113454	19238.2	0	0	0	0	0	0	0	0	21.7853	6.2147	0	0	0	0	0	0	0	0	5207.81	3095.59	0	0	0
269	Cusco	Peru	South America	4.37375e+07	-7087136	-1667000	South America	244199	218789	25410	0	0	0	0	0	0	0	0	32.8863	11.1137	0	0	0	0	0	0	0	0	6652.89	2286.37	0	0	0	0	0	0	0	0
22	Aira	Japan	Eastern Asia	2.49248e+07	11842940	3845140	Asia	62869.5	0	0	0	0	0	0	0	0	0	62869.5	0	0	0	0	0	0	0	0	0	25	0	0	0	0	0	0	0	0	0	2514.78
139	Batangas City	Philippines	South-Eastern Asia	5.46733e+07	11914100	1696773	Asia	163104	0	0	0	0	0	0	17427	145677	0	0	0	0	0	0	0	0	4.59648	50.4035	0	0	0	0	0	0	0	0	3791.38	2890.21	0	0
73	Arequipa	Peru	South America	8.35269e+07	-6986381	-2018750	South America	486948	0	0	0	0	0	0	0	114319	372629	0	0	0	0	0	0	0	0	23.4669	60.5331	0	0	0	0	0	0	0	0	4871.48	6155.79	0
126	Bangkinang	Indonesia	South-Eastern Asia	1.09264e+07	10124500	41955	Asia	71836.2	25894.4	0	0	0	0	0	0	0	0	0	5.07963	0	0	0	0	0	0	0	0	0	5097.7	0	0	0	0	0	0	0	0	0
353	Fukuyama	Japan	Eastern Asia	7.48186e+07	11860780	4163540	Asia	201441	34083.6	0	0	0	0	0	0	0	0	0	14.4345	0	0	0	0	0	0	0	0	0	2361.26	0	0	0	0	0	0	0	0	0
373	Girardot	Colombia	South America	1.78808e+07	-7483778	531556	South America	81048.8	0	0	7912.41	73136.4	0	0	0	0	0	0	0	0	2.73885	15.2612	0	0	0	0	0	0	0	0	2888.95	4792.32	0	0	0	0	0	0
828	Onomichi	Japan	Eastern Asia	4.58881e+07	11849022	4156500	Asia	103524	103524	0	0	0	0	0	0	0	0	0	46	0	0	0	0	0	0	0	0	0	2250.53	0	0	0	0	0	0	0	0	0
633	Lipa	Philippines	South-Eastern Asia	4.97043e+07	11919780	1717820	Asia	139006	0	0	0	0	0	0	0	3369.52	135637	0	0	0	0	0	0	0	0	1.30308	48.6969	0	0	0	0	0	0	0	0	2585.82	2785.32	0
892	Perpignan	France	Western Europe	2.29873e+07	239109	5088761	Europe	89623.9	0	0	0	89623.9	0	0	0	0	0	0	0	0	0.00114333	22.9989	0	0	0	0	0	0	0	0	0	3896.88	0	0	0	0	0	0
1	`Amran	Yemen	Western Asia	1.0937e+07	4302045	1926864	Asia	64444.3	0	0	0	0	0	0	0	1436.13	63008.1	0	0	0	0	0	0	0	0	0.571329	10.4287	0	0	0	0	0	0	0	0	2513.66	6041.82	0
559	Kirishima	Japan	Eastern Asia	3.38979e+07	11852912	3846765	Asia	87495	0	0	0	0	0	0	0	0	87495	0	0	0	0	0	0	0	0	0	34	0	0	0	0	0	0	0	0	0	2573.38	0
248	Clermont-Ferrand	France	Western Europe	5.10088e+07	248127	5424657	Europe	181147	0	0	0	0	0	0	0	0	64448.4	116698	0	0	0	0	0	0	0	0	23.8019	27.1981	0	0	0	0	0	0	0	0	2707.7	4290.67
984	San Pablo	Philippines	South-Eastern Asia	1.78937e+07	11933000	1733056	Asia	63526.8	0	0	0	0	0	0	0	0	0	63526.8	0	0	0	0	0	0	0	0	0	18	0	0	0	0	0	0	0	0	0	3529.27
292	Denizli	Turkey	Western Asia	3.39427e+07	2519176	4539882	Asia	256427	25674	0	0	0	0	0	0	0	0	0	7.39125	0	0	0	0	0	0	0	0	0	3473.56	0	0	0	0	0	0	0	0	0
63	Aomori	Japan	Eastern Asia	5.59448e+07	11861893	4881214	Asia	199979	0	0	0	0	0	0	0	140329	59649.8	0	0	0	0	0	0	0	0	41.2866	14.7134	0	0	0	0	0	0	0	0	3398.9	4054.1	0
604	La Dorada	Colombia	South America	1.29145e+07	-7462038	674962	South America	59029.5	0	42174.5	16855.1	0	0	0	0	0	0	0	0	10.888	2.112	0	0	0	0	0	0	0	0	3873.48	7980.62	0	0	0	0	0	0	0
996	Santa Cruz	Philippines	South-Eastern Asia	2.98234e+07	11933667	1756900	Asia	69584.9	0	0	0	0	0	0	0	36310.8	33274	0	0	0	0	0	0	0	0	14.4364	15.5636	0	0	0	0	0	0	0	0	2515.23	2137.94	0
1079	Tacna	Peru	South America	3.7794e+07	-6825026	-2214132	South America	136581	0	0	0	58273	78308.3	0	0	0	0	0	0	0	0	21.0942	16.9058	0	0	0	0	0	0	0	0	2762.51	4632.04	0	0	0	0	0
1184	Usak	Turkey	Western Asia	1.29807e+07	2527115	4640577	Asia	87089.2	0	56.0938	87033.1	0	0	0	0	0	0	0	0	0.0235202	12.9765	0	0	0	0	0	0	0	0	2384.92	6706.99	0	0	0	0	0	0	0
758	Muara Bungo	Indonesia	South-Eastern Asia	1.09265e+07	10232045	-184500	Asia	71844.7	71844.7	0	0	0	0	0	0	0	0	0	11	0	0	0	0	0	0	0	0	0	6531.33	0	0	0	0	0	0	0	0	0
424	Hirosaki	Japan	Eastern Asia	3.09678e+07	11864306	4856113	Asia	118083	0	0	0	0	0	0	0	0	118083	0	0	0	0	0	0	0	0	0	31	0	0	0	0	0	0	0	0	0	3809.12	0
1254	Zamora	Mexico	Central America	1.89024e+07	-9864974	2452447	North America	87341.3	0	0	0	6130.71	81210.6	0	0	0	0	0	0	0	0	1.13413	17.8659	0	0	0	0	0	0	0	0	5405.67	4545.57	0	0	0	0	0
626	Lido di Ostia	Italy	Southern Europe	9.99225e+06	1025400	4982300	Europe	77212.2	0	0	0	0	0	159.188	77053	0	0	0	0	0	0	0	0	1.01383	8.98617	0	0	0	0	0	0	0	0	157.015	8574.63	0	0	0
808	Nobeoka	Japan	Eastern Asia	3.49011e+07	11868329	3944300	Asia	101345	0	0	0	101345	0	0	0	0	0	0	0	0	0	35	0	0	0	0	0	0	0	0	0	2895.58	0	0	0	0	0	0
1183	Uruapan	Mexico	Central America	4.77492e+07	-9864146	2382188	North America	187865	0	0	0	17868	169997	0	0	0	0	0	0	0	0	6.66234	41.3377	0	0	0	0	0	0	0	0	2681.94	4112.4	0	0	0	0	0
12	Acilia	Italy	Southern Europe	3.19755e+07	1032594	4986188	Europe	114155	0	0	0	0	0	0	66847.9	47307.2	0	0	0	0	0	0	0	0	17.4999	14.5001	0	0	0	0	0	0	0	0	3819.91	3262.54	0	0
950	Rome	Italy	Southern Europe	3.88712e+08	1044405	4999243	Europe	2.24977e+06	0	0	0	0	0	0	266398	1.42825e+06	546951	8170.22	0	0	0	0	0	0	62.0158	199.397	124.563	3.02416	0	0	0	0	0	0	4295.64	7162.87	4390.95	2701.65
154	Bengkulu	Indonesia	South-Eastern Asia	4.3708e+07	10237523	-471886	Asia	119466	0	0	0	0	7293.39	112173	0	0	0	0	0	0	0	0	11.0036	32.9964	0	0	0	0	0	0	0	0	662.818	3399.55	0	0	0	0
748	Miyakonojo	Japan	Eastern Asia	3.58918e+07	11882722	3846111	Asia	108843	0	0	0	0	0	0	57018.2	51824.6	0	0	0	0	0	0	0	0	17.5068	18.4932	0	0	0	0	0	0	0	0	3256.92	2802.36	0	0
1126	Terni	Italy	Southern Europe	2.89832e+07	1046879	5074259	Europe	86893.7	39129.5	47764.2	0	0	0	0	0	0	0	0	15.8287	13.1713	0	0	0	0	0	0	0	0	2472.06	3626.39	0	0	0	0	0	0	0	0
989	Sana'a	Yemen	Western Asia	1.49136e+08	4331667	1890380	Asia	793063	0	0	0	0	0	0	350367	442696	0	0	0	0	0	0	0	0	62.1645	87.8355	0	0	0	0	0	0	0	0	5636.13	5040.06	0	0
127	Bangko	Indonesia	South-Eastern Asia	1.09266e+07	10246318	-255591	Asia	51656.1	0	0	51514.9	141.25	0	0	0	0	0	0	0	0	10.9279	0.0720793	0	0	0	0	0	0	0	0	4714.06	1959.65	0	0	0	0	0	0
749	Miyazaki	Japan	Eastern Asia	5.18457e+07	11899462	3867346	Asia	178181	0	0	0	0	164746	13435.1	0	0	0	0	0	0	0	0	47.5577	4.44227	0	0	0	0	0	0	0	0	3464.12	3024.37	0	0	0	0
268	Curup	Indonesia	South-Eastern Asia	2.68206e+07	10263796	-430241	Asia	150372	0	0	0	0	0	0	0	0	138529	11843.5	0	0	0	0	0	0	0	0	22.1794	4.82064	0	0	0	0	0	0	0	0	6245.85	2456.82
600	Kushiro	Japan	Eastern Asia	6.79673e+07	11911838	5121147	Asia	185100	0	0	0	0	149553	35546.9	0	0	0	0	0	0	0	0	51.3173	16.6827	0	0	0	0	0	0	0	0	2914.28	2130.76	0	0	0	0
651	Lucena	Philippines	South-Eastern Asia	1.59052e+07	11965625	1717250	Asia	108277	0	0	0	0	0	0	0	76179	32097.6	0	0	0	0	0	0	0	0	10.1742	5.82584	0	0	0	0	0	0	0	0	7487.49	5509.52	0
70	Arba Minch	Ethiopia	Eastern Africa	1.29149e+07	3750654	744115	Africa	76798.9	76798.9	0	0	0	0	0	0	0	0	0	13	0	0	0	0	0	0	0	0	0	5907.61	0	0	0	0	0	0	0	0	0
369	Gimbichu	Ethiopia	Eastern Africa	3.97412e+06	3751000	920000	Africa	62249.3	0	0	0	62249.3	0	0	0	0	0	0	0	0	0	4	0	0	0	0	0	0	0	0	0	15562.3	0	0	0	0	0	0
25	Akita	Japan	Eastern Asia	8.18983e+07	11927512	4758683	Asia	247154	0	0	0	0	0	168094	79059.2	0	0	0	0	0	0	0	0	44.9519	37.0481	0	0	0	0	0	0	0	0	3739.43	2133.96	0	0	0
614	Latina	Italy	Southern Europe	1.39883e+07	1080143	4952143	Europe	59186.7	0	0	0	0	0	0	59186.7	0	0	0	0	0	0	0	0	0	14	0	0	0	0	0	0	0	0	0	4227.62	0	0	0
682	Manna	Indonesia	South-Eastern Asia	1.2914e+07	10294885	-550962	Asia	63024	0	0	0	0	10243.7	52780.3	0	0	0	0	0	0	0	0	3.27841	9.72159	0	0	0	0	0	0	0	0	3124.6	5429.19	0	0	0	0
217	Chencha	Ethiopia	Eastern Africa	4.96732e+06	3751900	772300	Africa	55056.8	0	0	55056.8	0	0	0	0	0	0	0	0	0	5	0	0	0	0	0	0	0	0	0	11011.4	0	0	0	0	0	0	0
650	Lubuklinggau	Indonesia	South-Eastern Asia	1.49002e+07	10298633	-406967	Asia	94409.9	0	0	0	0	0	6	94403.9	0	0	0	0	0	0	0	0	0.0601114	14.9399	0	0	0	0	0	0	0	0	99.8147	6318.91	0	0	0
398	Hadero	Ethiopia	Eastern Africa	5.96109e+06	3757000	888667	Africa	50979.4	0	0	0	0	17700.7	33278.7	0	0	0	0	0	0	0	0	1.78771	4.21229	0	0	0	0	0	0	0	0	9901.35	7900.38	0	0	0	0
512	Kanazawa	Japan	Eastern Asia	1.55695e+08	11950513	4403019	Asia	513209	0	0	0	0	109521	403688	0	0	0	0	0	0	0	0	55.863	100.137	0	0	0	0	0	0	0	0	1960.54	4031.35	0	0	0	0
772	Naga	Philippines	South-Eastern Asia	2.1869e+07	12131682	1678773	Asia	75541.8	0	0	0	0	0	0	0	45383	30158.8	0	0	0	0	0	0	0	0	10.7711	11.2289	0	0	0	0	0	0	0	0	4213.41	2685.81	0
753	Morelia	Mexico	Central America	9.45078e+07	-9771479	2418047	North America	439445	0	0	0	211867	227578	0	0	0	0	0	0	0	0	44.466	50.534	0	0	0	0	0	0	0	0	4764.7	4503.46	0	0	0	0	0
451	Ibb	Yemen	Western Asia	1.88875e+07	4345605	1719974	Asia	148466	0	148466	0	0	0	0	0	0	0	0	0	19	0	0	0	0	0	0	0	0	0	7814.01	0	0	0	0	0	0	0	0
66	Ar Rijad	Yemen	Western Asia	9.94095e+06	4345500	1736600	Asia	56267.8	0	0	56267.8	0	0	0	0	0	0	0	0	0	10	0	0	0	0	0	0	0	0	0	5626.78	0	0	0	0	0	0	0
609	Lahat	Indonesia	South-Eastern Asia	1.49005e+07	10363833	-467900	Asia	120137	0	0	0	0	120137	0	0	0	0	0	0	0	0	0	15	0	0	0	0	0	0	0	0	0	8009.13	0	0	0	0	0
396	Hachinohe	Japan	Eastern Asia	6.09356e+07	11960713	4847615	Asia	149114	0	0	0	0	141807	7307.08	0	0	0	0	0	0	0	0.358271	57.1814	3.46036	0	0	0	0	0	0	0	0	2479.95	2111.65	0	0	0	0
459	Iloilo City	Philippines	South-Eastern Asia	8.34763e+07	12149548	1321488	Asia	370809	0	3763.78	260431	106615	0	0	0	0	0	0	0	1.97127	59.7679	22.2609	0	0	0	0	0	0	0	1909.31	4357.37	4789.34	0	0	0	0	0	0
350	Fukui	Japan	Eastern Asia	5.38884e+07	11963019	4346148	Asia	167924	0	0	0	0	94239	73685.1	0	0	0	0	0	0	0	0	29.2524	24.7476	0	0	0	0	0	0	0	0	3221.59	2977.46	0	0	0	0
787	Naples	Italy	Southern Europe	5.23487e+08	1207781	4884624	Europe	2.77812e+06	0	0	0	0	0	0	0	64542.8	1.49617e+06	1.21741e+06	0	0	0	0	0	0	0	21.546	287.794	214.66	0	0	0	0	0	0	0	2995.58	5198.76	5671.33
1182	Uriangato	Mexico	Central America	1.49232e+07	-9753767	2469433	North America	54988.9	0	0	0	54988.9	0	0	0	0	0	0	0	0	0	15	0	0	0	0	0	0	0	0	0	3665.93	0	0	0	0	0	0
205	Caserta	Italy	Southern Europe	6.19423e+07	1203032	4908161	Europe	218124	0	0	0	0	0	0	56290.5	161834	0	0	0	0	0	0	0	0	17.5695	44.4305	0	0	0	0	0	0	0	0	3203.88	3642.39	0	0
1087	Takaoka	Japan	Eastern Asia	6.48757e+07	11970315	4424700	Asia	123239	0	0	0	0	100366	22872.7	0	0	0	0	0	0	0	0	47.4916	17.5084	0	0	0	0	0	0	0	0	2113.35	1306.38	0	0	0	0
942	Reno	United States of America	Northern America	4.49422e+07	-10216011	4737167	North America	60516.2	0	15342.1	45174.1	0	0	0	0	0	0	0	0	10.2103	34.7897	0	0	0	0	0	0	0	0	1502.62	1298.49	0	0	0	0	0	0	0
464	Irapuato	Mexico	Central America	4.97483e+07	-9748160	2535520	North America	251089	131354	0	0	0	0	0	0	0	0	0	19.7668	0	0	0	0	0	0	0	0	0	6645.17	0	0	0	0	0	0	0	0	0
72	Areka	Ethiopia	Eastern Africa	8.94156e+06	3761389	872944	Africa	102036	0	0	0	0	0	102036	0	0	0	0	0	0	0	0	0	9	0	0	0	0	0	0	0	0	0	11337.3	0	0	0	0
759	Muara Enim	Indonesia	South-Eastern Asia	9.9336e+06	10387400	-452200	Asia	63549.2	0	63549.2	0	0	0	0	0	0	0	0	0	10	0	0	0	0	0	0	0	0	0	6354.92	0	0	0	0	0	0	0	0
319	Echizen	Japan	Eastern Asia	2.59453e+07	11973654	4328154	Asia	73238.7	0	0	0	43918	29320.7	0	0	0	0	0	0	0	0	14.1902	11.8098	0	0	0	0	0	0	0	0	3094.96	2482.73	0	0	0	0	0
809	Nola	Italy	Southern Europe	2.29779e+07	1223370	4893717	Europe	58775.8	0	0	0	0	0	0	0	0	58775.8	0	0	0	0	0	0	0	0	0	23	0	0	0	0	0	0	0	0	0	2555.47	0
531	Keban Agung	Indonesia	South-Eastern Asia	1.29137e+07	10389423	-464423	Asia	80279.9	0	66.0625	80213.8	0	0	0	0	0	0	0	0	0.214814	12.7852	0	0	0	0	0	0	0	0	307.533	6273.97	0	0	0	0	0	0	0
1152	Toyama	Japan	Eastern Asia	5.88864e+07	11990754	4418008	Asia	165300	0	0	0	0	0	10.2031	165290	0	0	0	0	0	0	0	0	0.0166779	58.9833	0	0	0	0	0	0	0	0	611.775	2802.32	0	0	0
364	Gela	Italy	Southern Europe	1.99631e+07	1241450	4458750	Europe	68591.1	12993.1	0	0	0	0	0	0	0	0	0	4.78562	0	0	0	0	0	0	0	0	0	2715.03	0	0	0	0	0	0	0	0	0
1076	Tabaco	Philippines	South-Eastern Asia	1.78923e+07	12192111	1645389	Asia	53175	0	0	0	0	0	0	0	0	51210.4	1964.6	0	0	0	0	0	0	0	0	17.1349	0.865094	0	0	0	0	0	0	0	0	2988.66	2270.97
103	Avellino	Italy	Southern Europe	2.19788e+07	1244773	4891545	Europe	66532.8	0	0	0	0	0	0	56202.3	10330.4	0	0	0	0	0	0	0	0	16.5969	5.40311	0	0	0	0	0	0	0	0	3386.32	1911.94	0	0
296	Dhamar	Yemen	Western Asia	2.38595e+07	4361542	1790375	Asia	131304	0	0	0	0	0	0	30860.2	100444	0	0	0	0	0	0	0	0	6.12716	17.8728	0	0	0	0	0	0	0	0	5036.62	5619.9	0	0
108	Bacolod	Philippines	South-Eastern Asia	1.05339e+08	12191292	1315349	Asia	430874	0	0	0	0	0	29056.8	356237	45579.8	0	0	0	0	0	0	0	6.66239	87.0018	12.3358	0	0	0	0	0	0	0	4361.31	4094.59	3694.93	0	0
967	Salerno	Italy	Southern Europe	2.89704e+07	1246638	4864810	Europe	133599	0	0	0	0	0	0	132412	1187.58	0	0	0	0	0	0	0	0	28.2732	0.726811	0	0	0	0	0	0	0	0	4683.29	1633.96	0	0
142	Baturaja	Indonesia	South-Eastern Asia	1.19205e+07	10423833	-509250	Asia	91305.7	0	91305.7	0	0	0	0	0	0	0	0	0	12	0	0	0	0	0	0	0	0	0	7608.81	0	0	0	0	0	0	0	0
964	Salamanca	Mexico	Central America	3.08434e+07	-9737435	2522468	North America	117482	102320	0	0	0	0	0	0	0	0	0	23.4881	0	0	0	0	0	0	0	0	0	4356.25	0	0	0	0	0	0	0	0	0
141	Battipaglia	Italy	Southern Europe	1.29865e+07	1264577	4857500	Europe	55985.7	0	0	0	0	45462.6	10523.1	0	0	0	0	0	0	0	0	11.1734	1.82661	0	0	0	0	0	0	0	0	4068.83	5761.01	0	0	0	0
1027	Shinshicho	Ethiopia	Eastern Africa	3.97406e+06	3768000	890000	Africa	59714.6	0	0	0	0	0	0	59714.6	0	0	0	0	0	0	0	0	0	4	0	0	0	0	0	0	0	0	0	14928.7	0	0	0
1235	Yarim	Yemen	Western Asia	8.94706e+06	4362056	1761278	Asia	108578	0	0	0	0	0	108578	0	0	0	0	0	0	0	0	0	9	0	0	0	0	0	0	0	0	0	12064.3	0	0	0	0
619	Legazpi	Philippines	South-Eastern Asia	3.77718e+07	12199711	1621053	Asia	103881	0	0	0	0	0	0	0	0	102914	967.435	0	0	0	0	0	0	0	0	36.8046	1.19536	0	0	0	0	0	0	0	0	2796.22	809.324
1158	Tsuruoka	Japan	Eastern Asia	2.09692e+07	12011310	4646976	Asia	93298.4	0	0	0	0	0	0	92982	316.344	0	0	0	0	0	0	0	0	20.4493	0.550685	0	0	0	0	0	0	0	0	4546.95	574.456	0	0
207	Catania	Italy	Southern Europe	1.01823e+08	1308098	4511873	Europe	462821	0	0	0	0	0	0	7532.22	443071	12218.2	0	0	0	0	0	0	0	3.57933	93.8346	4.58611	0	0	0	0	0	0	0	2104.37	4721.83	2664.17	0
1108	Tebela	Ethiopia	Eastern Africa	3.97395e+06	3769500	828000	Africa	57142	0	0	0	0	0	0	0	57142	0	0	0	0	0	0	0	0	0	4	0	0	0	0	0	0	0	0	0	14285.5	0	0
754	Morioka	Japan	Eastern Asia	6.29217e+07	12017849	4757246	Asia	237094	0	0	0	0	0	0	0	117047	120048	0	0	0	0	0	0	0	0	25.809	37.191	0	0	0	0	0	0	0	0	4535.11	3227.86	0
13	Acireale	Italy	Southern Europe	1.39759e+07	1314214	4519714	Europe	55984.2	0	0	0	0	0	0	0	50250.3	5733.89	0	0	0	0	0	0	0	0	11.8858	2.11417	0	0	0	0	0	0	0	0	4227.75	2712.13	0
683	Manresa	Spain	Southern Europe	6.99456e+06	153071	4981500	Europe	50749.3	0	0	50749.3	0	0	0	0	0	0	0	0	0	7	0	0	0	0	0	0	0	0	0	7249.9	0	0	0	0	0	0	0
1074	Syracuse	Italy	Southern Europe	2.4954e+07	1330900	4461180	Europe	103618	0	4765.16	98853.1	0	0	0	0	0	0	0	0	2.62788	22.3721	0	0	0	0	0	0	0	0	1813.31	4418.58	0	0	0	0	0	0	0
805	Niigata	Japan	Eastern Asia	1.208e+08	12029244	4554599	Asia	416392	0	0	136493	279899	0	0	0	0	0	0	0	0	41.9323	79.0677	0	0	0	0	0	0	0	0	3255.08	3540	0	0	0	0	0	0
966	Salem	United States of America	Northern America	4.99989e+07	-9940120	5335480	North America	81878.1	41803.6	0	0	0	0	0	0	0	0	0	21.544	0	0	0	0	0	0	0	0	0	1940.39	0	0	0	0	0	0	0	0	0
724	Messina	Italy	Southern Europe	4.59268e+07	1341717	4586130	Europe	182910	0	0	0	0	182910	0	0	0	0	0	0	0	0	0	46	0	0	0	0	0	0	0	0	0	3976.31	0	0	0	0	0
906	Portland	United States of America	Northern America	3.08034e+08	-9849422	5395750	North America	483968	0	0	77319	111734	270167	24748.7	0	0	0	0	0	0	50.9989	81.9023	159.565	15.5343	0	0	0	0	0	0	1516.09	1364.23	1693.15	1593.17	0	0	0	0
940	Reggio Calabria	Italy	Southern Europe	3.69404e+07	1352041	4576824	Europe	129962	0	0	8257.62	121705	0	0	0	0	0	0	0	0	4.19101	32.809	0	0	0	0	0	0	0	0	1970.32	3709.49	0	0	0	0	0	0
170	Boditi	Ethiopia	Eastern Africa	6.9545e+06	3776786	858929	Africa	80544.2	0	0	0	0	0	0	0	80544.2	0	0	0	0	0	0	0	0	0	7	0	0	0	0	0	0	0	0	0	11506.3	0	0
1080	Tacoma	United States of America	Northern America	5.90306e+07	-9638297	5583669	North America	58396.7	0	0	33973.6	24423.1	0	0	0	0	0	0	0	0	24.4909	34.5091	0	0	0	0	0	0	0	0	1387.19	707.731	0	0	0	0	0	0
1127	Terrassa	Spain	Southern Europe	2.19821e+07	169045	4963091	Europe	169708	0	69294.9	100413	0	0	0	0	0	0	0	0	10.7549	11.2451	0	0	0	0	0	0	0	0	6443.12	8929.49	0	0	0	0	0	0	0
516	Karaj	Iran	Southern Asia	2.02566e+08	4484352	4317167	Asia	1.58029e+06	55129.8	0	0	0	0	0	0	0	0	0	17.1928	0	0	0	0	0	0	0	0	0	3206.56	0	0	0	0	0	0	0	0	0
495	Joetsu	Japan	Eastern Asia	3.69327e+07	12034284	4472311	Asia	89407.7	0	0	0	0	0	8997.66	75522.3	4887.74	0	0	0	0	0	0	0	6.04196	28.7503	2.20773	0	0	0	0	0	0	0	1489.2	2626.83	2213.92	0	0
316	Durame	Ethiopia	Eastern Africa	6.95462e+06	3779929	895214	Africa	62029.2	0	0	0	0	0	0	6250.12	55779.1	0	0	0	0	0	0	0	0	1.42459	5.57541	0	0	0	0	0	0	0	0	4387.3	10004.5	0	0
588	Kotabumi	Indonesia	South-Eastern Asia	2.58284e+07	10489808	-598115	Asia	152732	0	150640	2092.46	0	0	0	0	0	0	0	0	25.1854	0.814633	0	0	0	0	0	0	0	0	5981.24	2568.59	0	0	0	0	0	0	0
993	Sant Boi de Llobregat	Spain	Southern Europe	2.09817e+07	169500	4937119	Europe	145134	7786.3	0	0	0	0	0	0	0	0	0	1.95297	0	0	0	0	0	0	0	0	0	3986.9	0	0	0	0	0	0	0	0	0
910	Pringsewu	Indonesia	South-Eastern Asia	1.39079e+07	10492429	-661357	Asia	68571.2	0	12992.2	55579	0	0	0	0	0	0	0	0	2.67985	11.3202	0	0	0	0	0	0	0	0	4848.12	4909.74	0	0	0	0	0	0	0
211	Cebu City	Philippines	South-Eastern Asia	2.41477e+08	12294447	1271899	Asia	1.12318e+06	264167	739448	119565	0	0	0	0	0	0	0	87.2662	113.626	42.1081	0	0	0	0	0	0	0	3027.14	6507.75	2839.49	0	0	0	0	0	0	0
136	Barcelona	Spain	Southern Europe	2.85759e+08	181549	4949601	Europe	2549076	1.16329e+06	1.03576e+06	312847	79.1021	0	0	0	0	0	0	100.559	113.016	64.6381	0.0415568	0	0	0	0	0	0	11568.3	9164.71	4839.98	1903.47	0	0	0	0	0	0
529	Kashiwazaki	Japan	Eastern Asia	1.7968e+07	12041611	4493222	Asia	65136.2	0	0	0	65136.2	0	0	0	0	0	0	0	0	0	18	0	0	0	0	0	0	0	0	0	3618.68	0	0	0	0	0	0
1011	Seattle	United States of America	Northern America	3.1719e+08	-9589084	5620402	North America	517075	230615	123087	24213.4	0	0	0	0	0	0	0	120.528	98.5684	15.7856	0	0	0	0	0	0	0	1913.37	1248.75	1533.9	0	0	0	0	0	0	0
385	Granollers	Spain	Southern Europe	1.39887e+07	191286	4968286	Europe	65459.9	0	0	0	65459.9	0	0	0	0	0	0	0	0	0	14	0	0	0	0	0	0	0	0	0	4675.71	0	0	0	0	0	0
1031	Shone	Ethiopia	Eastern Africa	6.95458e+06	3785643	881929	Africa	79641.5	0	0	0	0	0	0	0	0	79641.5	0	0	0	0	0	0	0	0	0	7	0	0	0	0	0	0	0	0	0	11377.4	0
110	Bagelen	Indonesia	South-Eastern Asia	1.19211e+07	10504417	-665000	Asia	50458.6	0	0	50458.6	0	0	0	0	0	0	0	0	0	12	0	0	0	0	0	0	0	0	0	4204.89	0	0	0	0	0	0	0
454	Iguala	Mexico	Central America	1.79033e+07	-9659500	2254111	North America	68668.5	120.43	68548	0	0	0	0	0	0	0	0	0.22272	17.7773	0	0	0	0	0	0	0	0	540.723	3855.94	0	0	0	0	0	0	0	0
696	Mataró	Spain	Southern Europe	1.29893e+07	203885	4960577	Europe	96600.2	0	0	62174.6	34425.7	0	0	0	0	0	0	0	0	8.82982	4.17018	0	0	0	0	0	0	0	0	7041.44	8255.19	0	0	0	0	0	0
886	Pemanggilan	Indonesia	South-Eastern Asia	2.18552e+07	10515409	-654636	Asia	85851.8	0	0	52709	33142.8	0	0	0	0	0	0	0	0	14.1838	7.81621	0	0	0	0	0	0	0	0	3716.14	4240.26	0	0	0	0	0	0
990	Sanjo	Japan	Eastern Asia	2.09639e+07	12049738	4522595	Asia	74763.5	0	0	0	562.438	74201.1	0	0	0	0	0	0	0	0	0.363294	20.6367	0	0	0	0	0	0	0	0	1548.16	3595.59	0	0	0	0	0
1083	Tagbilaran	Philippines	South-Eastern Asia	3.17977e+07	12305531	1191156	Asia	62107.4	9883.03	0	0	0	0	0	0	0	0	0	8.95026	0	0	0	0	0	0	0	0	0	1104.22	0	0	0	0	0	0	0	0	0
1231	Yakima	United States of America	Northern America	3.6013e+07	-9561417	5511917	North America	54649.8	0	54649.8	0	0	0	0	0	0	0	0	0	36	0	0	0	0	0	0	0	0	0	1518.05	0	0	0	0	0	0	0	0
1114	Tehran	Iran	Southern Asia	7.55367e+08	4522024	4299467	Asia	6368440	533139	360184	1.88191e+06	2.31642e+06	380631	0	0	0	0	0	84.595	106.85	226.736	204.052	50.6702	0	0	0	0	0	6302.26	3370.92	8299.97	11352.1	7511.94	0	0	0	0	0
121	Bandar Lampung	Indonesia	South-Eastern Asia	9.43753e+07	10521142	-668563	Asia	338536	0	0	0	73024	252892	12620.9	0	0	0	0	0	0	0	26.7192	61.6042	6.67657	0	0	0	0	0	0	0	2733.01	4105.1	1890.32	0	0	0	0
774	Nagaoka	Japan	Eastern Asia	1.89666e+07	12059079	4502079	Asia	67842.7	0	0	0	67842.7	0	0	0	0	0	0	0	0	0	18.9999	8.23642e-05	0	0	0	0	0	0	0	0	3570.69	0	0	0	0	0	0
374	Girona	Spain	Southern Europe	1.19914e+07	234000	5009083	Europe	66843.3	0	0	0	0	0	0	66681.1	162.231	0	0	0	0	0	0	0	0	11.3163	0.683724	0	0	0	0	0	0	0	0	5892.5	237.276	0	0
777	Nagoya	Japan	Eastern Asia	2.06629e+09	12108708	4238148	Asia	6.94914e+06	2.10353e+06	1.64712e+06	394566	0	0	0	0	0	0	0	428.719	489.585	161.416	0	0	0	0	0	0	0	4906.54	3364.32	2444.41	0	0	0	0	0	0	0
725	Metro	Indonesia	South-Eastern Asia	3.3776e+07	10528765	-632559	Asia	97999.8	0	68374.7	29625	0	0	0	0	0	0	0	0	23.1469	10.8531	0	0	0	0	0	0	0	0	2953.94	2729.65	0	0	0	0	0	0	0
773	Nagano	Japan	Eastern Asia	5.68894e+07	12081886	4410939	Asia	173088	0	0	0	0	0	0	20350.9	152737	0	0	0	0	0	0	0	0	11.5113	45.4887	0	0	0	0	0	0	0	0	1767.9	3357.7	0	0
1142	Toluca	Mexico	Central America	2.17852e+08	-9633418	2367838	North America	610165	0	0	0	0	0	0	58529.6	475270	76366	0	0	0	0	0	0	0	34.9506	159.638	24.4114	0	0	0	0	0	0	0	1674.64	2977.17	3128.3	0
26	Aksaray	Turkey	Western Asia	1.79721e+07	2931278	4606722	Asia	69828.5	0	0	0	0	0	0	23158.4	46670.2	0	0	0	0	0	0	0	0	9.09423	8.90577	0	0	0	0	0	0	0	0	2546.49	5240.44	0	0
41	Alaba Kulito	Ethiopia	Eastern Africa	8.94169e+06	3798389	903167	Africa	129587	0	0	0	0	0	0	0	129587	0	0	0	0	0	0	0	0	0	9	0	0	0	0	0	0	0	0	0	14398.6	0	0
1049	Sohung	North Korea	Eastern Asia	4.9923e+06	10872300	4611900	Asia	58349.8	58349.8	0	0	0	0	0	0	0	0	0	5	0	0	0	0	0	0	0	0	0	11670	0	0	0	0	0	0	0	0	0
513	Kani	Japan	Eastern Asia	5.88695e+07	12096331	4271805	Asia	126643	0	0	3112.28	123531	0	0	0	0	0	0	0	0	1.60568	57.3943	0	0	0	0	0	0	0	0	1938.29	2152.32	0	0	0	0	0	0
861	Pandeglang	Indonesia	South-Eastern Asia	1.29151e+07	10566038	-788654	Asia	70806.8	0	0	0	0	0	0	0	0	70806.8	0	0	0	0	0	0	0	0	0	13	0	0	0	0	0	0	0	0	0	5446.67	0
580	Koksan	North Korea	Eastern Asia	3.99418e+06	10875500	4653000	Asia	78430.8	0	0	78430.8	0	0	0	0	0	0	0	0	0	4	0	0	0	0	0	0	0	0	0	19607.7	0	0	0	0	0	0	0
700	Matsumoto	Japan	Eastern Asia	3.0937e+07	12101661	4363758	Asia	95681.3	0	0	0	0	0	0	95681.3	0	0	0	0	0	0	0	0	0	31	0	0	0	0	0	0	0	0	0	3086.49	0	0	0
927	Qarchak	Iran	Southern Asia	3.79155e+07	4558158	4265368	Asia	214960	0	97859.2	117100	0	0	0	0	0	0	0	0	9.68718	28.3128	0	0	0	0	0	0	0	0	10101.9	4135.95	0	0	0	0	0	0	0
180	Braja Asri	Indonesia	South-Eastern Asia	8.94072e+06	10567056	-639167	Asia	51413.2	0	0	0	51413.2	0	0	0	0	0	0	0	0	0	9	0	0	0	0	0	0	0	0	0	5712.58	0	0	0	0	0	0
1232	Yamagata	Japan	Eastern Asia	4.19337e+07	12105000	4592762	Asia	174184	0	0	0	0	0	0	0	0	174184	0	0	0	0	0	0	0	0	0	42	0	0	0	0	0	0	0	0	0	4147.24	0
980	San Juan del Río	Mexico	Central America	2.5868e+07	-9627154	2500500	North America	65625.7	0	550.195	65075.5	0	0	0	0	0	0	0	0	0.295057	25.7049	0	0	0	0	0	0	0	0	1864.71	2531.63	0	0	0	0	0	0	0
1173	Ueda	Japan	Eastern Asia	2.29541e+07	12109848	4383065	Asia	84430.8	0	0	0	0	0	0	0	84430.8	0	0	0	0	0	0	0	0	0	23	0	0	0	0	0	0	0	0	0	3670.91	0	0
765	Munchon	North Korea	Eastern Asia	1.49798e+07	10890300	4705300	Asia	94179.2	7957.85	0	0	0	0	0	0	0	0	0	2.62852	0	0	0	0	0	0	0	0	0	3027.51	0	0	0	0	0	0	0	0	0
1086	Tajimi	Japan	Eastern Asia	3.69174e+07	12113986	4261230	Asia	104295	0	0	41690.3	62605.1	0	0	0	0	0	0	0	0	15.2408	21.7592	0	0	0	0	0	0	0	0	2735.44	2877.18	0	0	0	0	0	0
265	Cuernavaca	Mexico	Central America	1.56168e+08	-9608213	2320774	North America	469937	0	0	0	0	0	0	104509	346921	18507.6	0	0	0	0	0	0	0	42.1147	108.682	6.20313	0	0	0	0	0	0	0	2481.54	3192.06	2983.58	0
804	Nigde	Turkey	Western Asia	9.98359e+06	2998600	4561100	Asia	50164.9	0	0	0	0	597.418	49567.5	0	0	0	0	0	0	0	0	0.592047	9.40795	0	0	0	0	0	0	0	0	1009.07	5268.68	0	0	0	0
896	Pishva	Iran	Southern Asia	9.97764e+06	4569400	4258700	Asia	112969	0	24272.5	88696.5	0	0	0	0	0	0	0	0	3.20295	6.79705	0	0	0	0	0	0	0	0	7578.19	13049.3	0	0	0	0	0	0	0
655	Lushui	China	Eastern Asia	8.96253e+06	9282722	3152722	Asia	52243.2	0	0	52243.2	0	0	0	0	0	0	0	0	0	9	0	0	0	0	0	0	0	0	0	5804.8	0	0	0	0	0	0	0
240	Cilegon	Indonesia	South-Eastern Asia	9.63648e+07	10589046	-743552	Asia	248472	0	0	0	0	0	0	47743	200729	0	0	0	0	0	0	0	0	27.7843	69.2157	0	0	0	0	0	0	0	0	1718.34	2900.05	0	0
458	Iligan	Philippines	South-Eastern Asia	3.17945e+07	12373094	1015531	Asia	140088	0	0	0	140088	0	0	0	0	0	0	0	0	0	32	0	0	0	0	0	0	0	0	0	4377.74	0	0	0	0	0	0
728	Mexico City	Mexico	Central America	1.84532e+09	-9579223	2387479	North America	15495828	0	0	0	242576	2000542	2807336	4.78554e+06	4.5021e+06	1.15501e+06	2730.04	0	0	0	72.084	326.7	316.048	484.663	469.412	184.611	1.48307	0	0	0	3365.18	6123.49	8882.63	9873.95	9590.93	6256.46	1840.8
52	Amol	Iran	Southern Asia	2.39525e+07	4583583	4391208	Asia	93322.4	0	0	0	83329	9993.39	0	0	0	0	0	0	0	0	21.4737	2.52627	0	0	0	0	0	0	0	0	3880.51	3955.79	0	0	0	0	0
1122	Tengchong	China	Eastern Asia	1.5931e+07	9287750	3056500	Asia	93572.7	0	0	0	0	0	0	0	93572.7	0	0	0	0	0	0	0	0	0	16	0	0	0	0	0	0	0	0	0	5848.29	0	0
861	Pandeglang	Indonesia	South-Eastern Asia	3.47713e+07	10593443	-780157	Asia	196059	0	0	0	0	0	0	0	0	655.875	195403	0	0	0	0	0	0	0	0	0.632218	34.3678	0	0	0	0	0	0	0	0	1037.42	5685.65
895	Phyongsan	North Korea	Eastern Asia	1.09828e+07	10896136	4601955	Asia	76021.1	0	54893.3	21127.8	0	0	0	0	0	0	0	0	7.11222	3.88778	0	0	0	0	0	0	0	0	7718.17	5434.41	0	0	0	0	0	0	0
823	Okaya	Japan	Eastern Asia	2.49483e+07	12125420	4345500	Asia	76023.9	0	0	0	0	0	0	0	75959.7	64.1783	0	0	0	0	0	0	0	0	24.3111	0.688901	0	0	0	0	0	0	0	0	3124.49	93.1605	0
1241	Yirga Cheffe	Ethiopia	Eastern Africa	4.96729e+06	3815100	760700	Africa	85826.9	0	0	85826.9	0	0	0	0	0	0	0	0	0	4.99952	0.000483288	0	0	0	0	0	0	0	0	17167	0	0	0	0	0	0	0
431	Hoi An	Vietnam	South-Eastern Asia	1.98861e+07	10596600	1955400	Asia	66171.4	533.794	0	0	0	0	0	0	0	0	0	0.434144	0	0	0	0	0	0	0	0	0	1229.53	0	0	0	0	0	0	0	0	0
1078	Tacloban	Philippines	South-Eastern Asia	3.08081e+07	12379823	1384565	Asia	133286	0	0	0	77802.6	55483.7	0	0	0	0	0	0	0	0	19.9372	11.0628	0	0	0	0	0	0	0	0	3902.37	5015.36	0	0	0	0	0
264	Cuautla	Mexico	Central America	3.97877e+07	-9584975	2312150	North America	115130	0	0	0	0	0	51959.9	63169.7	0	0	0	0	0	0	0	0	16.6027	23.3973	0	0	0	0	0	0	0	0	3129.62	2699.87	0	0	0
482	Jakarta	Indonesia	South-Eastern Asia	3.17215e+09	10666032	-785259	Asia	19326940	0	0	279826	4599140	6.18402e+06	3015606	1.51772e+06	1103677	2.35967e+06	267283	0	0	76.0217	575.077	848.519	519.923	370.74	281.763	460.189	60.7673	0	0	3680.87	7997.43	7288.01	5800.11	4093.75	3917.04	5127.62	4398.47
1073	Suwa	Japan	Eastern Asia	2.99376e+07	12141500	4337000	Asia	74475.3	0	0	0	0	0	0	0	7708.97	66766.3	0	0	0	0	0	0	0	0	4.93173	25.0683	0	0	0	0	0	0	0	0	1563.14	2663.38	0
686	Marawi	Philippines	South-Eastern Asia	8.54464e+07	12381500	989500	Asia	290498	0	0	0	0	0	102220	188277	0	0	0	0	0	0	0	0	31.3944	54.6056	0	0	0	0	0	0	0	0	3256.01	3447.95	0	0	0
555	Kibet	Ethiopia	Eastern Africa	3.97426e+06	3818000	991000	Africa	88423.5	0	0	0	0	0	0	0	0	0	88423.5	0	0	0	0	0	0	0	0	0	4	0	0	0	0	0	0	0	0	0	22105.9
939	Rangkasbitung	Indonesia	South-Eastern Asia	2.28498e+07	10608152	-785109	Asia	209274	0	0	0	0	0	0	0	209274	0	0	0	0	0	0	0	0	0	23	0	0	0	0	0	0	0	0	0	9098.87	0	0
1017	Sendai	Japan	Eastern Asia	2.6059e+08	12152462	4595987	Asia	1.05754e+06	0	0	0	0	153764	622877	280903	0	0	0	0	0	0	0	55.253	144.946	60.801	0	0	0	0	0	0	0	2782.9	4297.3	4620.05	0	0	0
261	Cotabato City	Philippines	South-Eastern Asia	2.38444e+07	12390833	891625	Asia	210779	0	0	0	0	13764.4	197015	0	0	0	0	0	0	0	0	3.34079	20.6592	0	0	0	0	0	0	0	0	4120.11	9536.41	0	0	0	0
1223	Wonsan	North Korea	Eastern Asia	3.79479e+07	10906711	4694658	Asia	324299	318619	5680.65	0	0	0	0	0	0	0	0	34.8739	3.12607	0	0	0	0	0	0	0	0	9136.3	1817.19	0	0	0	0	0	0	0	0
462	Inter-nishi	Japan	Eastern Asia	2.49563e+07	12147340	4507780	Asia	106891	0	0	0	0	0	0	0	2612.98	104278	0	0	0	0	0	0	0	0	1.82906	23.1709	0	0	0	0	0	0	0	0	1428.6	4500.39	0
195	Cagayan de Oro	Philippines	South-Eastern Asia	7.45197e+07	12406580	1048247	Asia	282008	0	58265	223743	0	0	0	0	0	0	0	0	10.784	64.216	0	0	0	0	0	0	0	0	5402.91	3484.23	0	0	0	0	0	0	0
530	Kayseri	Turkey	Western Asia	6.19092e+07	3050581	4648694	Asia	246609	0	0	0	0	0	0	44330.1	195417	6861.73	0	0	0	0	0	0	0	8.35864	51.6549	1.9865	0	0	0	0	0	0	0	5303.5	3783.13	3454.18	0
107	Babol	Iran	Southern Asia	2.7945e+07	4608929	4399464	Asia	112680	0	112228	451.839	0	0	0	0	0	0	0	0	27.4708	0.529182	0	0	0	0	0	0	0	0	4085.34	853.845	0	0	0	0	0	0	0
854	Palabuhanratu	Indonesia	South-Eastern Asia	2.88116e+07	10630707	-865328	Asia	127790	0	0	0	0	0	0	54547.9	73241.7	0	0	0	0	0	0	0	0	20.337	8.66301	0	0	0	0	0	0	0	0	2682.2	8454.53	0	0
456	Iida	Japan	Eastern Asia	2.79386e+07	12158250	4281464	Asia	83023.3	0	0	0	0	83023.3	0	0	0	0	0	0	0	0	0	28	0	0	0	0	0	0	0	0	0	2965.12	0	0	0	0	0
362	Gedeb	Ethiopia	Eastern Africa	3.97379e+06	3821000	731000	Africa	54518.5	54518.5	0	0	0	0	0	0	0	0	0	4	0	0	0	0	0	0	0	0	0	13629.6	0	0	0	0	0	0	0	0	0
846	Paechon	North Korea	Eastern Asia	4.99182e+06	10919100	4563700	Asia	86547.3	86547.3	0	0	0	0	0	0	0	0	0	5	0	0	0	0	0	0	0	0	0	17309.5	0	0	0	0	0	0	0	0	0
300	Dilla	Ethiopia	Eastern Africa	1.09282e+07	3824591	792409	Africa	79157.3	0	0	0	0	79157.3	0	0	0	0	0	0	0	0	0	11	0	0	0	0	0	0	0	0	0	7196.12	0	0	0	0	0
586	Kosan	North Korea	Eastern Asia	5.99137e+06	10933167	4661333	Asia	73049.6	0	0	0	471.219	72578.4	0	0	0	0	0	0	0	0	0.869293	5.13071	0	0	0	0	0	0	0	0	542.071	14145.9	0	0	0	0	0
352	Fukushima	Japan	Eastern Asia	6.28938e+07	12165421	4539103	Asia	163907	0	0	0	0	0	0	0	64974.8	98932	0	0	0	0	0	0	0	0	29.6114	33.3886	0	0	0	0	0	0	0	0	2194.25	2963.05	0
926	Qaem Shahr	Iran	Southern Asia	2.39525e+07	4627708	4390542	Asia	90791.1	16513.1	74278	0	0	0	0	0	0	0	0	4.72291	19.2771	0	0	0	0	0	0	0	0	3496.39	3853.17	0	0	0	0	0	0	0	0
241	Cipanas	Indonesia	South-Eastern Asia	6.35833e+07	10682969	-832094	Asia	521096	0	0	0	0	0	0	0	0	140885	380211	0	0	0	0	0	0	0	0	25.855	38.145	0	0	0	0	0	0	0	0	5449.03	9967.52
506	Kaesong	North Korea	Eastern Asia	1.3977e+07	10942286	4561929	Asia	225496	0	3886.89	221609	0	0	0	0	0	0	0	0	1.2834	12.7166	0	0	0	0	0	0	0	0	3028.59	17426.7	0	0	0	0	0	0	0
470	Ishinomaki	Japan	Eastern Asia	2.596e+07	12168192	4612808	Asia	74901.8	0	0	0	9810.16	65091.7	0	0	0	0	0	0	0	0	4.20629	21.7937	0	0	0	0	0	0	0	0	2332.26	2986.72	0	0	0	0	0
135	Baoshan	China	Eastern Asia	7.26866e+07	9348130	3068048	Asia	234513	0	0	105773	128741	0	0	0	0	0	0	0	0	41.3357	31.6643	0	0	0	0	0	0	0	0	2558.87	4065.8	0	0	0	0	0	0
548	Kertasari	Indonesia	South-Eastern Asia	1.39089e+07	10706214	-842000	Asia	52997.8	0	0	0	0	0	0	52997.8	0	0	0	0	0	0	0	0	0	14	0	0	0	0	0	0	0	0	0	3785.56	0	0	0
1088	Takasaki [Maebashi]	Japan	Eastern Asia	1.59679e+08	12183450	4378194	Asia	526463	0	0	0	0	0	0	0	381244	145218	0	0	0	0	0	0	0	0	103.649	56.3513	0	0	0	0	0	0	0	0	3678.24	2577.02	0
1128	Texcoco de Mora	Mexico	Central America	3.97918e+07	-9554350	2397500	North America	92248.8	0	0	0	0	14363.9	77884.9	0	0	0	0	0	0	0	0	4.92409	35.0759	0	0	0	0	0	0	0	0	2917.08	2220.47	0	0	0	0
[truncated: 338 more rows]

## Sheet: 1995
city_ID	Name	Country	Subregion	Area_km2	Lat	Lon	Continent	Ttl_Ppl	100to90	90to80	80to70	70to60	60to50	50to40	40to30	30to20	20to10	Pp_10km	Area100to90	Area90to80	Area80to70	Area70to60	Area60to50	Area50to40	Area40to30	Area30to20	Area20to10	Ar_10_2	Dens100to90	Dens90to80	Dens80to70	Dens70to60	Dens60to50	Dens50to40	Dens40to30	Dens30to20	Dens20to10	Dens10
[truncated: 837 more rows]

[truncated: 7 more sheets: 2000, 2005, 2010, 2015, 2020, 2025, 2030]
