# Supplementary material for: Cities near volcanoes are increasingly threatened by volcanic hazards
Source: Research Square preprint supplement (doi:10.21203/rs.3.rs-8315006/v1), 2025-12-10
Supplement: Supplementary file 3 [file b9a621cde10c2afcf6b0fc92.xlsx]

## Sheet: Sheet1
Supplementary 3: Datasets used to generate flow direction probabilities for volcanoes <30km of case study cities, used in the FlowDIR tool of Tennant et al., 2023 and presented in Figure 9.
City	Volcano	UTM zone	StartX	StartY	DEM	Swath length (m)	Buffer (m)	Elevation threshold	Start uncertainty (radius)	Notes
Jakarta and Bandung	Pulosari	48S	607860	9299233	8.3m	500	100	100	50
					DEMNAS	Long enough to extend outside of the crater.	Breached crater towards west, this is sufficient to extend away from this.	Between min and max crater to rim height. SE rim unlikely to be overtopped	Covers the flat bottom of the crater where the fumaroles are.
	Karang	48S	617209	9306117	8.3m	500	20	500	50	Two craters are mentioned in GVP, only one is visible in topography, used this one as start.
					DEMNAS	Long enough to extend outside of the crater.	Small, crater is well defined	All directions can be overtopped	Covers the flat bottom of the crater.
	Salak	48S	689854	9257298	8.3m	400	100	150	100	Used Kawah Ratu as starting point, this is a bit off the summit, but this is the location of the fumaroles and is where the CVGHM hazard map considers the summit.
					DEMNAS	Enough to reach over the ridge in the N direction	Sufficient to extend simulation downslope towards the SW direction	All directions can be overtopped	Width of Kawah ratu
	Gede	48S	719153	9249485	8.3m	800	100	100	50	As in Tennant et al., 2023
					DEMNAS	Extends out of summit region	Breached crater towards north, want to extend away from this.	Steep S crater wall cannot be overtopped	Covers 1840 dome
	Papandayan	48S	801598	9190435	8.3m	1000	100	500	50
					DEMNAS	Enough to reach outside of the fumarole field	Large to extend simulation away from starting point	Everything can be overtopped	Covers central area of fumarole field (more than this and the variable is too large for matlab)
	Tampomas	49S	163982	9251247	8.3m	400	50	Not applicable for convex summit	50
					DEMNAS	Long enough to extend away from summit region.	Tampomas has a convex summit, this is sufficient to extend calculation away from summit		Sufficient to cover peak
	Talagabodas	49S	175889	9201952	8.3m	500	20	150	0	Has lake in the crater. Lake is treated as flat in the DEM. We don’t run FlowDIRs second method the PSD as this doesn’t work on the flat topography
					DEMNAS	Long enough to extend away from summit region.	Well defined crater rim.	Everything can be overtopped.	No need as surrounding cells are flat.
	Patuha	48S	765065	9207756	8.3m	300 m	30	60	50 m
					DEMNAS	Sufficient to extend outside of the crater in all directions.	Well defined crater rim.	Crater is shallow, allow everything to be overtopped.	Fills crater floor with start points.
	Guntur	48S	814964	9208138	8.3 m DEMNAS	300 m	30	60 m
						Sufficient to extend outside of the crater in all directions.	Well defined crater rim.	Between min and max crater wall height.	80 m
	Galunggung	48S	839731	9196816	8.3m	600 m	30	50 m	100 m
					DEMNAS	Long enough to reach the crater rim visible in the SE direction	Well defined crater rim.	Max crater floor to rim height ~ 100m, min ~0 in the upslope direction. We choose in between the two values.	Crater diameter ~ 1km, 200 m results in a large part of the crater floor covered in initialisation points. Trade off with execution time, because the crater is very wide, a lot of steps are needed to reach the edge in the least cost path calculation. N = 441
	Tangkuban-Parahu	48S	789098	9252124	8.3m	600 m	30	150 m	100 m
					DEMNAS	Long enough to extend out of the wide flat crater	Well defined crater rim.	Between min and max crater wall height.	Crater diameter = 900 x 600m. A start uncertainty of 100 m results in a decent amount of the crater to be covered in initialisation points, but is a trade off with execution time. N = 441
	Perbakti-Gagak									Not conducted as heavily eroded so setting the initialisation polygon is too uncertain.
	Kendang									Not conducted as heavily eroded so setting the initialisation polygon is too uncertain.
Manila	Taal									Not conducted as it has a crater lake, in the DEM this appears as flat
	Banahaw	51N	337073	1554688	30m	1500	200	700	200
					SRTM	Long enough to extend outside of the crater.	Enough to extend calculation away from breach direction	Everything can be overtopped	Covers the bottom of the crater
	San Pablo Volcanic Field									Not conducted - volcanic field, vent unknown
Quito	Guagua Pichincha	17N	765915	18311	30m	1200	60	500	250
						Long enough to extend outside of the crater.	Low value used, (2 grid cells) crater wall is well defined	Unlikely to overtop the steep NE wall segment (> 500m from floor to rim)	Covers existing dome
					Souris, M. (2006). Ecuador DEMs from digitized topographic maps (1:50000 and 1:100000). Available online at: http://www.savgis.org/ecuador.htm (Accessed December 29, 2023).
	Atacazo	17N	764802	39128	30m	700	60	500	100
					Souris, M. (2006). Ecuador DEMs from digitized topographic maps (1:50000 and 1:100000). Available online at: http://www.savgis.org/ecuador.htm (Accessed December 29, 2023).	Long enough to extend outside of the crater.	Low (2 grid cells) crater wall is well defined	All directions can be overtopped	Covers bottom of crater
	Pululahua									Not conducted - Caldera with no obvious evidence of future vent location.
	Chacana									Not conducted - Caldera with no obvious evidence of future vent location.
Tokyo	Hakoneyama	54 N	319603	3900895	30m	300	50	150	100	Start location Kanmurigatake (latest lava dome ~3ka) very flat top. Most recent eruption was phreatic from the fumarole field ~500 m away towards the NNE. Note that dome sits within caldera rim ~ 6 km away. There is infrastructure within caldera though unlikely to overtop wall
					SRTM	Long enough to extend away from summit region.	Extends calculation away from breach	NA for convex topography	Covers bottom of the crater	Mannen et al., 2018 (https://link.springer.com/article/ 10.1186/s40623-018-0844-2)
San Salvador	San Salvador	16N	252841	1519817	30m	900	30	500	250
					SRTM	Long enough to extend outside of the crater.	Low (1 grid cell) crater wall is well defined	All directions likely to be overtopped	Covers bottom of the crater
	Cinotepeque Cerro	16N	257466	1549728	30m	200	30	50	20	This looks like a scoria cone, the whole edifice is ~ 500m in diameter, unlikely to erupt again at same location
					SRTM	Long enough to extend outside of the crater.	Extends calculation away from breach	Very low crater rim, all directions likely to be overtopped	Covers bottom of the crater
	San Vicente	16N	252841	1519817	30m	350	30	150	60	Crater locations have migrated eastwards (Major et al., 2001) we use the furthest E crater
					SRTM	Long enough to extend outside of the crater.	Low, crater is well defined	Low crater rim, all directions likely to be overtopped	Covers bottom of the crater
	Apastepeque Field									Not conducted - volcanic field, vent unknown
	Ilopango									Not conducted - Caldera with no obvious evidence of future vent location.
	Mojanda									Not conducted as heavily eroded so setting the initialisation polygon is too uncertain.
	Guazapa									Not conducted as heavily eroded so setting the initialisation polygon is too uncertain.
Addis Ababa	Bishoftu Volcanic Field									Not conducted - volcanic field, vent unknown
Naples	Vesuvius	33N	957685	4533125	10m	500	20	400	80
					https://tinitaly.pi.ingv.it/	Long enough to extend outside of the crater.	Low, crater is well defined	All directions likely to be overtopped	Covers bottom of the crater
					Download_Area1_0.html
	Ischia									Not conducted as heavily eroded so setting the initialisation polygon is too uncertain.
	Campi Flegrei									Not conducted - Caldera with no obvious evidence of future vent location.
