# Supplementary material for: Cities near volcanoes are increasingly threatened by volcanic hazards
Source: Research Square preprint supplement (doi:10.21203/rs.3.rs-8315006/v1), 2025-12-10
Supplement: Supplementary file 4 [file e78d18bdee0df67f8b33fc5e.xlsx]

## Sheet: Supplementary 4
Supplementary 4: Number and proportion of cities located at different distances from a volcano. Only cities from 2030 that were exposed prior are included.
The 10, 30 and 100 km distances buffers are typically associated with the distance of life-threatening volcanic hazards that a city may be exposed to.
Buffer Condition	Number of Cities	% of cities (total = 1137)
Part of city within 10 km	94	8.26737
Part of city within 30 km	384	33.7731
Part of city within 100 km	1137	100
Part of city within 10 – 30 km	367	32.2779
Part of city within 30 – 100 km	886	77.9244
City fully within 10 km	17	1.49516
City fully within 30 km	251	22.0756
City fully within 100 km	1041	91.5567
City fully within 10 – 30 km	167	14.6878
City fully within 30 – 100 km	658	57.8716
